# Supplementary material for: Three-metal-ion catalysis by ribonuclease P holoenzyme: a new mechanistic insight into transfer RNA maturation
Source: Research Square preprint supplement (doi:10.21203/rs.3.rs-9187222/v1), 2026-05-14

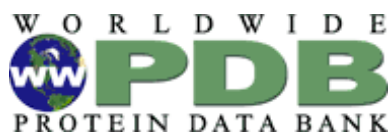

# Full wwPDB EM Validation Report ⓘ

Jun 4, 2025 – 05:26 AM EDT

PDB ID : 9OWR / pdb\_00009owr  
EMDB ID : EMD-70941  
Title : Structure of Geobacillus stearothermophilus RNase P holoenzyme in 5 mM Ca<sup>2+</sup>  
Deposited on : 2025-06-02  
Resolution : 2.96 Å (reported)  
Based on initial model : 2A64

**This wwPDB validation report is for manuscript review**

This is a Full wwPDB EM Validation Report.

This report is produced by the wwPDB biocuration pipeline after annotation of the structure.

We welcome your comments at [validation@mail.wwpdb.org](mailto:validation@mail.wwpdb.org)

A user guide is available at

<https://www.wwpdb.org/validation/2017/EMValidationReportHelp>

with specific help available everywhere you see the ⓘ symbol.

The types of validation reports are described at

<http://www.wwpdb.org/validation/2017/FAQs#types>.

---

The following versions of software and data (see [references ⓘ](#)) were used in the production of this report:

EMDB validation analysis : 0.0.1.dev118  
MolProbity : 4-5-2 with Phenix2.0rc1  
Percentile statistics : 20231227.v01 (using entries in the PDB archive December 27th 2023)  
MapQ : 1.9.13  
Ideal geometry (proteins) : Engh & Huber (2001)  
Ideal geometry (DNA, RNA) : Parkinson et al. (1996)  
Validation Pipeline (wwPDB-VP) : 2.43.1

# 1 Overall quality at a glance i

The following experimental techniques were used to determine the structure:  
*ELECTRON MICROSCOPY*

The reported resolution of this entry is 2.96 Å.

Percentile scores (ranging between 0-100) for global validation metrics of the entry are shown in the following graphic. The table shows the number of entries on which the scores are based.

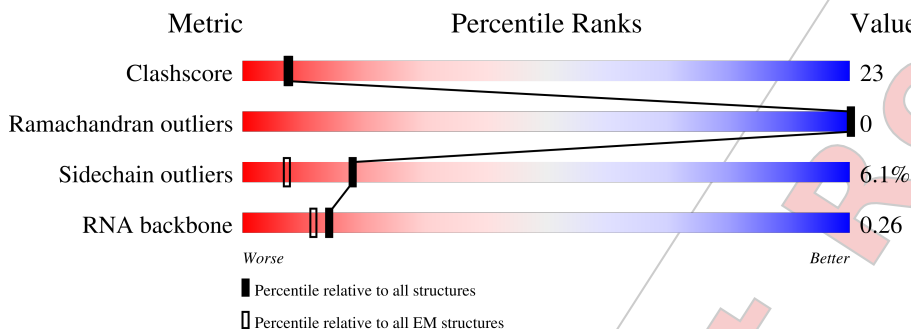

| Metric                | Whole archive (#Entries) | EM structures (#Entries) |
|-----------------------|--------------------------|--------------------------|
| Clashscore            | 210492                   | 15764                    |
| Ramachandran outliers | 207382                   | 16835                    |
| Sidechain outliers    | 206894                   | 16415                    |
| RNA backbone          | 6643                     | 2191                     |

The table below summarises the geometric issues observed across the polymeric chains and their fit to the map. The red, orange, yellow and green segments of the bar indicate the fraction of residues that contain outliers for  $\geq 3$ , 2, 1 and 0 types of geometric quality criteria respectively. A grey segment represents the fraction of residues that are not modelled. The numeric value for each fraction is indicated below the corresponding segment, with a dot representing fractions  $\leq 5\%$ . The upper red bar (where present) indicates the fraction of residues that have poor fit to the EM map (all-atom inclusion  $< 40\%$ ). The numeric value is given above the bar.

| Mol | Chain | Length | Quality of chain   |
|-----|-------|--------|--------------------|
| 1   | A     | 417    | <br>6% 23% 51% 25% |
| 2   | B     | 116    | <br>65% 31%        |

## 2 Entry composition [i](#)

There are 3 unique types of molecules in this entry. The entry contains 9927 atoms, of which 0 are hydrogens and 0 are deuteriums.

In the tables below, the AltConf column contains the number of residues with at least one atom in alternate conformation and the Trace column contains the number of residues modelled with at most 2 atoms.

- Molecule 1 is a RNA chain called RNase P RNA component.

| Mol | Chain | Residues | Atoms |      |      |      |     | AltConf | Trace |
|-----|-------|----------|-------|------|------|------|-----|---------|-------|
|     |       |          | Total | C    | N    | O    | P   |         |       |
| 1   | A     | 417      | 8962  | 3996 | 1660 | 2889 | 417 | 0       | 0     |

There are 2 discrepancies between the modelled and reference sequences:

| Chain | Residue | Modelled | Actual | Comment  | Reference |
|-------|---------|----------|--------|----------|-----------|
| A     | 126     | U        | C      | conflict | GB 143442 |
| A     | 417     | C        | G      | conflict | GB 143442 |

- Molecule 2 is a protein called Ribonuclease P protein component.

| Mol | Chain | Residues | Atoms |     |     |     |   | AltConf | Trace |
|-----|-------|----------|-------|-----|-----|-----|---|---------|-------|
|     |       |          | Total | C   | N   | O   | S |         |       |
| 2   | B     | 116      | 947   | 608 | 174 | 162 | 3 | 0       | 0     |

There are 2 discrepancies between the modelled and reference sequences:

| Chain | Residue | Modelled | Actual | Comment        | Reference      |
|-------|---------|----------|--------|----------------|----------------|
| B     | 0       | GLY      | -      | expression tag | UNP A0A150N245 |
| B     | 64      | ILE      | VAL    | conflict       | UNP A0A150N245 |

- Molecule 3 is CALCIUM ION (CCD ID: CA) (formula: Ca) (labeled as "Ligand of Interest" by depositor).

| Mol | Chain | Residues | Atoms |    | AltConf |
|-----|-------|----------|-------|----|---------|
| 3   | A     | 18       | Total | Ca | 0       |
|     |       |          | 18    | 18 |         |

### 3 Residue-property plots

These plots are drawn for all protein, RNA, DNA and oligosaccharide chains in the entry. The first graphic for a chain summarises the proportions of the various outlier classes displayed in the second graphic. The second graphic shows the sequence view annotated by issues in geometry and atom inclusion in map density. Residues are color-coded according to the number of geometric quality criteria for which they contain at least one outlier: green = 0, yellow = 1, orange = 2 and red = 3 or more. A red diamond above a residue indicates a poor fit to the EM map for this residue (all-atom inclusion < 40%). Stretches of 2 or more consecutive residues without any outlier are shown as a green connector. Residues present in the sample, but not in the model, are shown in grey.

● Molecule 1: RNase P RNA component

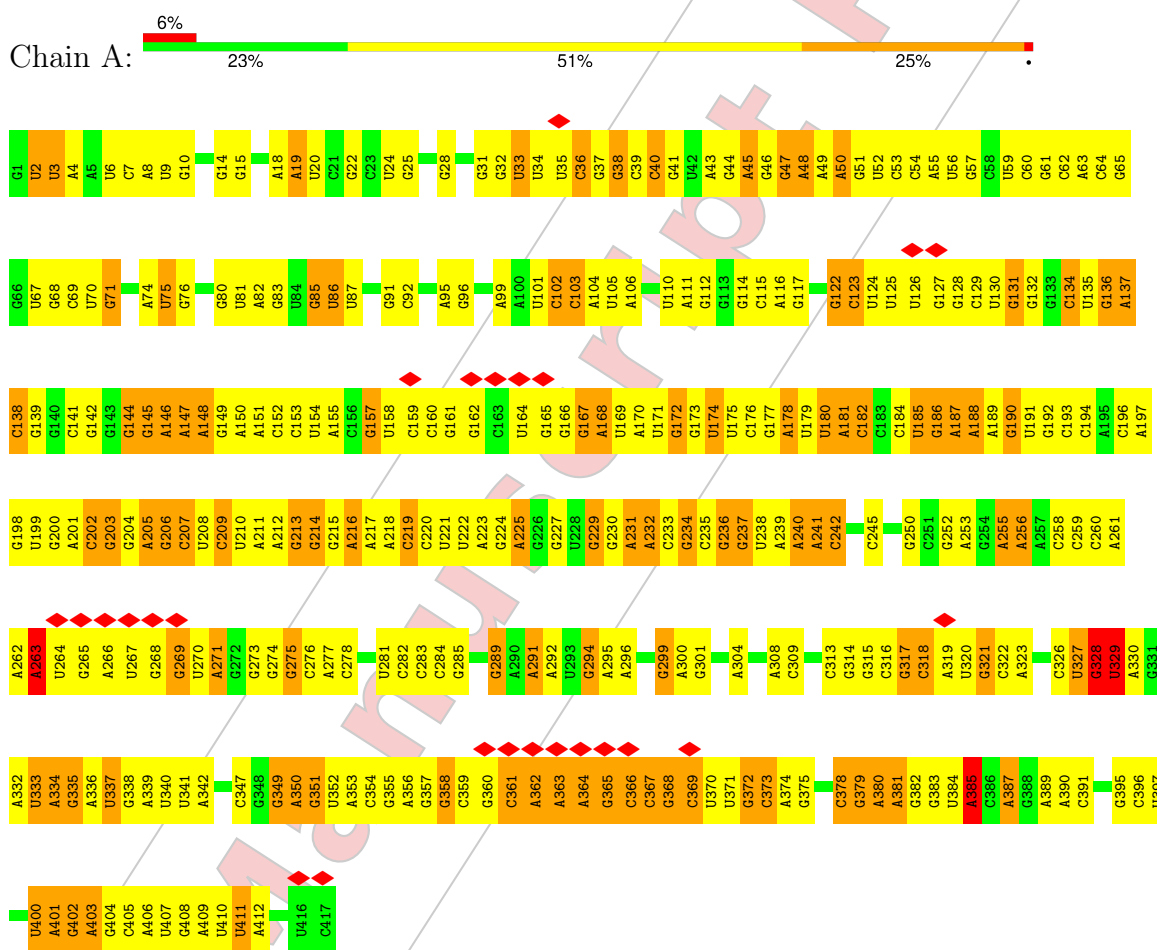

● Molecule 2: Ribonuclease P protein component

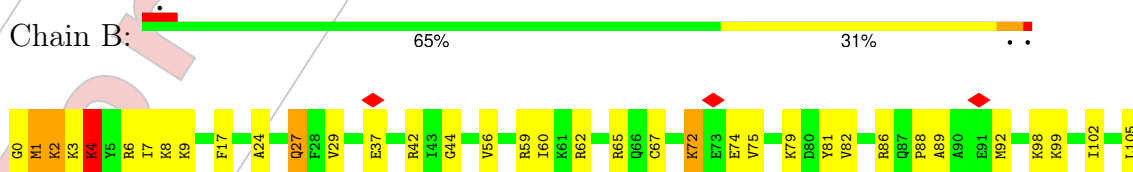

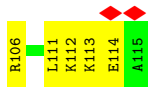

For Manuscript Review

## 4 Experimental information i

| Property                             | Value                                   | Source    |
|--------------------------------------|-----------------------------------------|-----------|
| EM reconstruction method             | SINGLE PARTICLE                         | Depositor |
| Imposed symmetry                     | POINT, Not provided                     |           |
| Number of particles used             | 615963                                  | Depositor |
| Resolution determination method      | FSC 0.143 CUT-OFF                       | Depositor |
| CTF correction method                | PHASE FLIPPING AND AMPLITUDE CORRECTION | Depositor |
| Microscope                           | FEI TALOS ARCTICA                       | Depositor |
| Voltage (kV)                         | 200                                     | Depositor |
| Electron dose ( $e^-/\text{\AA}^2$ ) | 57                                      | Depositor |
| Minimum defocus (nm)                 | 500                                     | Depositor |
| Maximum defocus (nm)                 | 1500                                    | Depositor |
| Magnification                        | Not provided                            |           |
| Image detector                       | GATAN K3 BIOQUANTUM (6k x 4k)           | Depositor |
| Maximum map value                    | 0.472                                   | Depositor |
| Minimum map value                    | -0.153                                  | Depositor |
| Average map value                    | -0.000                                  | Depositor |
| Map value standard deviation         | 0.005                                   | Depositor |
| Recommended contour level            | 0.0519                                  | Depositor |
| Map size (Å)                         | 414.72, 414.72, 414.72                  | wwPDB     |
| Map dimensions                       | 400, 400, 400                           | wwPDB     |
| Map angles (°)                       | 90.0, 90.0, 90.0                        | wwPDB     |
| Pixel spacing (Å)                    | 1.0368, 1.0368, 1.0368                  | Depositor |

## 5 Model quality [i](#)

### 5.1 Standard geometry [i](#)

Bond lengths and bond angles in the following residue types are not validated in this section: CA

The Z score for a bond length (or angle) is the number of standard deviations the observed value is removed from the expected value. A bond length (or angle) with  $|Z| > 5$  is considered an outlier worth inspection. RMSZ is the root-mean-square of all Z scores of the bond lengths (or angles).

| Mol | Chain | Bond lengths |         | Bond angles |                 |
|-----|-------|--------------|---------|-------------|-----------------|
|     |       | RMSZ         | # Z  >5 | RMSZ        | # Z  >5         |
| 1   | A     | 0.59         | 0/10038 | 0.91        | 13/15661 (0.1%) |
| 2   | B     | 0.34         | 0/962   | 0.64        | 1/1281 (0.1%)   |
| All | All   | 0.58         | 0/11000 | 0.89        | 14/16942 (0.1%) |

Chiral center outliers are detected by calculating the chiral volume of a chiral center and verifying if the center is modelled as a planar moiety or with the opposite hand. A planarity outlier is detected by checking planarity of atoms in a peptide group, atoms in a mainchain group or atoms of a sidechain that are expected to be planar.

| Mol | Chain | #Chirality outliers | #Planarity outliers |
|-----|-------|---------------------|---------------------|
| 2   | B     | 0                   | 1                   |

There are no bond length outliers.

All (14) bond angle outliers are listed below:

| Mol | Chain | Res | Type | Atoms       | Z     | Observed(°) | Ideal(°) |
|-----|-------|-----|------|-------------|-------|-------------|----------|
| 1   | A     | 327 | U    | O3'-P-O5'   | -9.40 | 89.90       | 104.00   |
| 1   | A     | 299 | G    | O3'-P-O5'   | -7.17 | 93.25       | 104.00   |
| 1   | A     | 328 | G    | O3'-P-O5'   | -6.42 | 94.38       | 104.00   |
| 1   | A     | 329 | U    | C1'-C2'-O2' | -6.26 | 102.41      | 111.80   |
| 1   | A     | 387 | A    | O3'-P-O5'   | -5.81 | 95.29       | 104.00   |
| 1   | A     | 385 | A    | C4'-C3'-C2' | -5.72 | 96.88       | 102.60   |
| 1   | A     | 139 | G    | O3'-P-O5'   | -5.71 | 95.44       | 104.00   |
| 1   | A     | 263 | A    | C2'-C3'-O3' | -5.53 | 105.41      | 113.70   |
| 2   | B     | 4   | LYS  | N-CA-C      | -5.41 | 105.03      | 111.03   |
| 1   | A     | 289 | G    | C4'-C3'-C2' | -5.38 | 97.22       | 102.60   |
| 1   | A     | 44  | G    | C4'-C3'-C2' | -5.36 | 97.25       | 102.60   |
| 1   | A     | 333 | U    | O3'-P-O5'   | -5.32 | 96.02       | 104.00   |
| 1   | A     | 263 | A    | P-O3'-C3'   | 5.14  | 127.91      | 120.20   |
| 1   | A     | 385 | A    | O4'-C4'-C3' | -5.09 | 98.91       | 104.00   |

There are no chirality outliers.

All (1) planarity outliers are listed below:

| Mol | Chain | Res | Type | Group     |
|-----|-------|-----|------|-----------|
| 2   | B     | 6   | ARG  | Sidechain |

## 5.2 Too-close contacts [\(i\)](#)

In the following table, the Non-H and H(model) columns list the number of non-hydrogen atoms and hydrogen atoms in the chain respectively. The H(added) column lists the number of hydrogen atoms added and optimized by MolProbity. The Clashes column lists the number of clashes within the asymmetric unit, whereas Symm-Clashes lists symmetry-related clashes.

| Mol | Chain | Non-H | H(model) | H(added) | Clashes | Symm-Clashes |
|-----|-------|-------|----------|----------|---------|--------------|
| 1   | A     | 8962  | 0        | 4509     | 287     | 0            |
| 2   | B     | 947   | 0        | 1008     | 29      | 0            |
| 3   | A     | 18    | 0        | 0        | 0       | 0            |
| All | All   | 9927  | 0        | 5517     | 312     | 0            |

The all-atom clashscore is defined as the number of clashes found per 1000 atoms (including hydrogen atoms). The all-atom clashscore for this structure is 23.

All (312) close contacts within the same asymmetric unit are listed below, sorted by their clash magnitude.

| Atom-1         | Atom-2        | Interatomic distance (Å) | Clash overlap (Å) |
|----------------|---------------|--------------------------|-------------------|
| 1:A:364:A:C4   | 1:A:365:G:H1' | 1.96                     | 1.01              |
| 1:A:148:A:N6   | 1:A:177:G:N3  | 2.19                     | 0.90              |
| 1:A:371:U:H5'' | 1:A:372:G:H5' | 1.54                     | 0.89              |
| 1:A:148:A:H61  | 1:A:177:G:H1' | 1.44                     | 0.83              |
| 1:A:230:G:H21  | 1:A:231:A:H2' | 1.45                     | 0.82              |
| 1:A:172:G:H5'' | 1:A:216:A:H61 | 1.42                     | 0.82              |
| 1:A:363:A:H2'  | 1:A:364:A:C4  | 2.13                     | 0.82              |
| 1:A:367:C:H2'  | 1:A:368:G:C8  | 2.15                     | 0.80              |
| 1:A:378:C:H3'  | 1:A:379:G:C8  | 2.18                     | 0.79              |
| 1:A:378:C:H3'  | 1:A:379:G:H8  | 1.50                     | 0.77              |
| 1:A:154:U:H2'  | 1:A:155:A:C8  | 2.21                     | 0.76              |
| 1:A:379:G:C8   | 1:A:379:G:OP2 | 2.41                     | 0.73              |
| 1:A:207:C:H2'  | 1:A:208:U:C6  | 2.24                     | 0.72              |
| 1:A:322:C:H2'  | 1:A:323:A:C8  | 2.25                     | 0.71              |
| 1:A:230:G:N2   | 1:A:231:A:H2' | 2.06                     | 0.70              |
| 1:A:47:G:H1    | 1:A:385:A:H62 | 1.37                     | 0.69              |
| 1:A:206:G:N1   | 1:A:232:A:O2' | 2.25                     | 0.69              |

Continued on next page...

*Continued from previous page...*

| Atom-1        | Atom-2          | Interatomic distance (Å) | Clash overlap (Å) |
|---------------|-----------------|--------------------------|-------------------|
| 1:A:364:A:C5  | 1:A:365:G:H1'   | 2.27                     | 0.69              |
| 1:A:385:A:H1' | 1:A:401:A:C8    | 2.28                     | 0.68              |
| 2:B:7:ILE:HA  | 2:B:42:ARG:HH21 | 1.58                     | 0.68              |
| 1:A:382:G:H2' | 1:A:383:G:O4'   | 1.94                     | 0.68              |
| 1:A:363:A:C8  | 1:A:363:A:H5''  | 2.28                     | 0.68              |
| 1:A:148:A:H61 | 1:A:177:G:C1'   | 2.08                     | 0.66              |
| 1:A:31:G:N2   | 1:A:32:G:N2     | 2.43                     | 0.66              |
| 1:A:364:A:H3' | 1:A:365:G:O4'   | 1.95                     | 0.65              |
| 1:A:185:U:H2' | 1:A:186:G:C8    | 2.32                     | 0.65              |
| 2:B:0:GLY:HA2 | 2:B:65:ARG:HB3  | 1.79                     | 0.65              |
| 1:A:45:A:H62  | 2:B:62:ARG:NH2  | 1.96                     | 0.64              |
| 1:A:138:C:H4' | 1:A:138:C:OP2   | 1.94                     | 0.64              |
| 1:A:161:G:H3' | 1:A:162:G:H8    | 1.62                     | 0.64              |
| 1:A:187:A:N3  | 1:A:245:C:O2'   | 2.28                     | 0.64              |
| 1:A:122:G:H3' | 1:A:123:C:H5''  | 1.78                     | 0.64              |
| 1:A:130:U:H2' | 1:A:131:G:C8    | 2.34                     | 0.63              |
| 1:A:380:A:H3' | 1:A:381:A:H8    | 1.63                     | 0.63              |
| 1:A:45:A:H62  | 2:B:62:ARG:HH22 | 1.46                     | 0.63              |
| 1:A:157:G:H1  | 1:A:169:U:H3    | 1.46                     | 0.63              |
| 1:A:206:G:H1' | 1:A:207:C:H5    | 1.62                     | 0.63              |
| 2:B:56:VAL:O  | 2:B:60:ILE:HG12 | 1.98                     | 0.63              |
| 1:A:241:A:H2' | 1:A:242:C:C6    | 2.35                     | 0.62              |
| 1:A:154:U:H2' | 1:A:155:A:H8    | 1.62                     | 0.62              |
| 1:A:155:A:H1' | 1:A:217:A:N3    | 2.15                     | 0.61              |
| 1:A:379:G:H8  | 1:A:379:G:OP2   | 1.83                     | 0.61              |
| 1:A:130:U:H2' | 1:A:131:G:H8    | 1.65                     | 0.61              |
| 1:A:177:G:C8  | 1:A:178:A:H2'   | 2.36                     | 0.60              |
| 2:B:89:ALA:HA | 2:B:92:MET:SD   | 2.42                     | 0.60              |
| 1:A:363:A:O3' | 1:A:364:A:O4'   | 2.15                     | 0.60              |
| 1:A:374:A:H2' | 1:A:375:G:C8    | 2.37                     | 0.59              |
| 1:A:147:A:H2' | 1:A:148:A:O4'   | 2.03                     | 0.59              |
| 1:A:186:G:N2  | 1:A:188:A:H3'   | 2.16                     | 0.59              |
| 1:A:364:A:OP1 | 1:A:365:G:N7    | 2.35                     | 0.59              |
| 1:A:216:A:H2' | 1:A:217:A:C8    | 2.38                     | 0.59              |
| 1:A:136:G:O2' | 1:A:137:A:N7    | 2.36                     | 0.58              |
| 1:A:379:G:H8  | 1:A:379:G:P     | 2.25                     | 0.58              |
| 1:A:186:G:N1  | 1:A:189:A:OP2   | 2.35                     | 0.58              |
| 1:A:360:G:H22 | 1:A:363:A:H5''  | 1.68                     | 0.58              |
| 1:A:360:G:N2  | 1:A:363:A:H5''  | 2.18                     | 0.58              |
| 1:A:373:C:H2' | 1:A:374:A:C8    | 2.39                     | 0.58              |
| 1:A:407:U:H2' | 1:A:408:G:C8    | 2.39                     | 0.58              |

*Continued on next page...*

Continued from previous page...

| Atom-1          | Atom-2         | Interatomic distance (Å) | Clash overlap (Å) |
|-----------------|----------------|--------------------------|-------------------|
| 1:A:137:A:H1'   | 1:A:240:A:N1   | 2.19                     | 0.58              |
| 1:A:220:C:H2'   | 1:A:221:U:C6   | 2.38                     | 0.58              |
| 1:A:159:C:H2'   | 1:A:160:C:C6   | 2.39                     | 0.57              |
| 1:A:147:A:H3'   | 1:A:148:A:H8   | 1.69                     | 0.57              |
| 1:A:60:C:H2'    | 1:A:61:G:H8    | 1.68                     | 0.57              |
| 1:A:208:U:H3    | 1:A:225:A:H61  | 1.52                     | 0.57              |
| 1:A:252:G:C2'   | 1:A:253:A:H5'  | 2.35                     | 0.57              |
| 1:A:31:G:C2     | 1:A:32:G:C2    | 2.93                     | 0.56              |
| 1:A:32:G:H2'    | 1:A:33:U:H5'   | 1.88                     | 0.56              |
| 1:A:364:A:H3'   | 1:A:364:A:OP2  | 2.05                     | 0.56              |
| 2:B:106:ARG:HB2 | 2:B:113:LYS:HA | 1.88                     | 0.56              |
| 1:A:381:A:C2    | 1:A:382:G:H1'  | 2.41                     | 0.56              |
| 1:A:63:A:H2'    | 1:A:64:C:O4'   | 2.06                     | 0.56              |
| 1:A:411:U:H2'   | 1:A:412:A:C8   | 2.40                     | 0.56              |
| 1:A:360:G:H22   | 1:A:363:A:C5'  | 2.19                     | 0.56              |
| 1:A:147:A:O2'   | 1:A:148:A:H5'  | 2.06                     | 0.56              |
| 1:A:194:C:N4    | 1:A:202:C:OP2  | 2.37                     | 0.55              |
| 1:A:115:C:H2'   | 1:A:116:A:H8   | 1.72                     | 0.55              |
| 1:A:31:G:N2     | 1:A:37:G:C4    | 2.75                     | 0.55              |
| 1:A:181:A:H2'   | 1:A:182:C:O4'  | 2.06                     | 0.55              |
| 1:A:381:A:H2'   | 1:A:382:G:O4'  | 2.07                     | 0.55              |
| 1:A:198:G:H22   | 1:A:200:G:H3'  | 1.71                     | 0.55              |
| 1:A:241:A:H2'   | 1:A:242:C:H6   | 1.71                     | 0.55              |
| 1:A:161:G:H3'   | 1:A:162:G:C8   | 2.42                     | 0.55              |
| 1:A:207:C:H2'   | 1:A:208:U:H6   | 1.72                     | 0.55              |
| 1:A:255:A:OP1   | 1:A:256:A:O2'  | 2.25                     | 0.55              |
| 1:A:198:G:N2    | 1:A:200:G:H3'  | 2.21                     | 0.54              |
| 1:A:338:G:H2'   | 1:A:339:A:H8   | 1.73                     | 0.54              |
| 1:A:123:C:H4'   | 1:A:123:C:OP1  | 2.08                     | 0.54              |
| 1:A:338:G:H2'   | 1:A:339:A:C8   | 2.43                     | 0.54              |
| 1:A:59:U:H2'    | 1:A:60:C:C6    | 2.42                     | 0.54              |
| 1:A:166:G:H2'   | 1:A:167:G:C8   | 2.43                     | 0.54              |
| 1:A:315:G:H2'   | 1:A:316:C:C6   | 2.43                     | 0.54              |
| 1:A:161:G:N2    | 1:A:164:U:H3'  | 2.23                     | 0.54              |
| 1:A:187:A:O2'   | 1:A:188:A:C8   | 2.61                     | 0.54              |
| 1:A:64:C:O2'    | 1:A:82:A:N1    | 2.29                     | 0.54              |
| 1:A:186:G:H22   | 1:A:189:A:P    | 2.31                     | 0.53              |
| 1:A:205:A:H2'   | 1:A:205:A:N3   | 2.23                     | 0.53              |
| 1:A:339:A:O2'   | 1:A:340:U:H5'  | 2.08                     | 0.53              |
| 1:A:385:A:H8    | 1:A:400:U:HO2' | 1.52                     | 0.53              |
| 1:A:190:G:H2'   | 1:A:191:U:O4'  | 2.09                     | 0.53              |

Continued on next page...

Continued from previous page...

| Atom-1          | Atom-2           | Interatomic distance (Å) | Clash overlap (Å) |
|-----------------|------------------|--------------------------|-------------------|
| 1:A:262:A:H2    | 1:A:270:U:O2     | 1.92                     | 0.53              |
| 1:A:172:G:H4'   | 1:A:217:A:N1     | 2.24                     | 0.53              |
| 1:A:364:A:OP2   | 1:A:365:G:O4'    | 2.21                     | 0.53              |
| 1:A:60:C:H2'    | 1:A:61:G:C8      | 2.43                     | 0.52              |
| 1:A:364:A:C3'   | 1:A:365:G:O4'    | 2.56                     | 0.52              |
| 2:B:79:LYS:HD2  | 2:B:81:TYR:HE1   | 1.74                     | 0.52              |
| 2:B:56:VAL:HA   | 2:B:59:ARG:HH12  | 1.75                     | 0.52              |
| 1:A:176:C:H2'   | 1:A:177:G:O4'    | 2.08                     | 0.52              |
| 1:A:268:G:H2'   | 1:A:269:G:C8     | 2.45                     | 0.52              |
| 2:B:17:PHE:HE1  | 2:B:82:VAL:HG11  | 1.75                     | 0.52              |
| 2:B:112:LYS:HG3 | 2:B:114:GLU:HG2  | 1.92                     | 0.52              |
| 1:A:381:A:C6    | 1:A:382:G:C4     | 2.98                     | 0.52              |
| 1:A:178:A:C8    | 1:A:180:U:C5     | 2.98                     | 0.51              |
| 1:A:153:C:H2'   | 1:A:154:U:C6     | 2.46                     | 0.51              |
| 1:A:349:G:N2    | 1:A:350:A:H62    | 2.08                     | 0.51              |
| 1:A:316:C:H2'   | 1:A:317:G:N7     | 2.26                     | 0.51              |
| 1:A:181:A:C2    | 1:A:182:C:H1'    | 2.45                     | 0.51              |
| 1:A:222:U:H2'   | 1:A:223:A:C8     | 2.45                     | 0.51              |
| 1:A:350:A:C5    | 1:A:380:A:H1'    | 2.46                     | 0.51              |
| 1:A:3:U:H2'     | 1:A:4:A:C8       | 2.45                     | 0.50              |
| 1:A:230:G:N3    | 1:A:230:G:H2'    | 2.26                     | 0.50              |
| 1:A:215:G:N2    | 1:A:217:A:H3'    | 2.26                     | 0.50              |
| 1:A:252:G:H2'   | 1:A:253:A:H5'    | 1.94                     | 0.50              |
| 2:B:99:LYS:O    | 2:B:102:ILE:HG13 | 2.12                     | 0.50              |
| 1:A:199:U:H2'   | 1:A:200:G:O4'    | 2.12                     | 0.50              |
| 1:A:203:G:C4    | 1:A:205:A:H1'    | 2.46                     | 0.50              |
| 1:A:18:A:H2'    | 1:A:19:A:C8      | 2.47                     | 0.50              |
| 1:A:208:U:H3    | 1:A:225:A:N6     | 2.09                     | 0.50              |
| 1:A:174:U:H2'   | 1:A:175:U:C6     | 2.46                     | 0.50              |
| 1:A:116:A:H2'   | 1:A:117:G:H8     | 1.76                     | 0.50              |
| 1:A:165:G:H3'   | 1:A:166:G:H8     | 1.77                     | 0.50              |
| 1:A:322:C:H2'   | 1:A:323:A:H8     | 1.74                     | 0.50              |
| 1:A:379:G:H21   | 1:A:380:A:H8     | 1.57                     | 0.50              |
| 1:A:261:A:H2    | 1:A:271:A:N7     | 2.10                     | 0.50              |
| 1:A:363:A:H5''  | 1:A:363:A:H8     | 1.74                     | 0.50              |
| 1:A:75:U:H3     | 1:A:291:A:H1'    | 1.77                     | 0.49              |
| 1:A:356:A:H3'   | 1:A:357:G:H8     | 1.77                     | 0.49              |
| 1:A:2:U:H2'     | 1:A:3:U:C6       | 2.46                     | 0.49              |
| 1:A:383:G:H2'   | 1:A:384:U:O4'    | 2.11                     | 0.49              |
| 1:A:124:U:H2'   | 1:A:125:U:O4'    | 2.13                     | 0.49              |
| 1:A:138:C:H5''  | 1:A:138:C:C6     | 2.48                     | 0.49              |

Continued on next page...

Continued from previous page...

| Atom-1         | Atom-2           | Interatomic distance (Å) | Clash overlap (Å) |
|----------------|------------------|--------------------------|-------------------|
| 1:A:363:A:O2'  | 1:A:364:A:C1'    | 2.60                     | 0.49              |
| 2:B:74:GLU:HB3 | 2:B:111:LEU:HD11 | 1.94                     | 0.49              |
| 1:A:361:C:O2'  | 1:A:362:A:H3'    | 2.12                     | 0.49              |
| 1:A:175:U:H2'  | 1:A:176:C:C6     | 2.48                     | 0.49              |
| 1:A:319:A:H1'  | 1:A:320:U:C5     | 2.47                     | 0.49              |
| 1:A:378:C:C3'  | 1:A:379:G:H8     | 2.21                     | 0.49              |
| 1:A:92:C:OP2   | 1:A:138:C:H5'    | 2.13                     | 0.49              |
| 2:B:44:GLY:HA3 | 2:B:82:VAL:HG22  | 1.95                     | 0.49              |
| 1:A:161:G:H22  | 1:A:164:U:H3'    | 1.78                     | 0.48              |
| 1:A:334:A:O4'  | 1:A:335:G:N2     | 2.46                     | 0.48              |
| 1:A:378:C:H2'  | 1:A:379:G:H1'    | 1.95                     | 0.48              |
| 1:A:141:C:O2   | 1:A:241:A:N6     | 2.46                     | 0.48              |
| 1:A:327:U:H2'  | 1:A:328:G:C8     | 2.49                     | 0.48              |
| 1:A:230:G:H2'  | 1:A:231:A:C8     | 2.49                     | 0.48              |
| 1:A:380:A:C6   | 1:A:381:A:C5     | 3.01                     | 0.48              |
| 2:B:24:ALA:HB2 | 2:B:29:VAL:HG22  | 1.96                     | 0.48              |
| 1:A:147:A:C4   | 1:A:148:A:C8     | 3.02                     | 0.48              |
| 1:A:38:G:H2'   | 1:A:39:C:H6      | 1.79                     | 0.48              |
| 1:A:55:A:H2'   | 1:A:56:U:C6      | 2.49                     | 0.48              |
| 1:A:274:G:H2'  | 1:A:275:G:O4'    | 2.14                     | 0.48              |
| 1:A:354:C:H2'  | 1:A:355:G:C8     | 2.49                     | 0.48              |
| 1:A:95:A:H2'   | 1:A:96:G:C8      | 2.49                     | 0.47              |
| 1:A:327:U:H2'  | 1:A:328:G:H8     | 1.79                     | 0.47              |
| 1:A:360:G:H1'  | 1:A:365:G:N2     | 2.29                     | 0.47              |
| 1:A:177:G:H2'  | 1:A:178:A:C8     | 2.50                     | 0.47              |
| 1:A:196:C:H2'  | 1:A:197:A:O4'    | 2.15                     | 0.47              |
| 1:A:295:A:O2'  | 1:A:296:A:H5'    | 2.13                     | 0.47              |
| 1:A:378:C:C3'  | 1:A:379:G:C8     | 2.94                     | 0.47              |
| 1:A:262:A:H3'  | 1:A:263:A:C8     | 2.49                     | 0.47              |
| 1:A:70:U:H2'   | 1:A:71:G:O4'     | 2.14                     | 0.47              |
| 1:A:236:G:H2'  | 1:A:237:G:H8     | 1.79                     | 0.47              |
| 1:A:31:G:C2    | 1:A:32:G:N1      | 2.83                     | 0.47              |
| 1:A:45:A:C8    | 1:A:45:A:H5'     | 2.50                     | 0.47              |
| 1:A:224:G:H2'  | 1:A:225:A:O4'    | 2.14                     | 0.47              |
| 1:A:379:G:H2'  | 1:A:380:A:H5''   | 1.97                     | 0.47              |
| 1:A:159:C:H2'  | 1:A:160:C:H6     | 1.78                     | 0.46              |
| 1:A:169:U:H2'  | 1:A:170:A:C8     | 2.49                     | 0.46              |
| 1:A:230:G:C5   | 1:A:231:A:C6     | 3.04                     | 0.46              |
| 1:A:380:A:H3'  | 1:A:381:A:C8     | 2.47                     | 0.46              |
| 1:A:114:G:H2'  | 1:A:115:C:C6     | 2.50                     | 0.46              |
| 1:A:71:G:H1'   | 1:A:295:A:H2     | 1.81                     | 0.46              |

Continued on next page...

Continued from previous page...

| Atom-1           | Atom-2         | Interatomic distance (Å) | Clash overlap (Å) |
|------------------|----------------|--------------------------|-------------------|
| 1:A:340:U:H2'    | 1:A:341:U:O4'  | 2.16                     | 0.46              |
| 1:A:315:G:H2'    | 1:A:316:C:H6   | 1.81                     | 0.46              |
| 1:A:85:G:H1'     | 1:A:86:U:C4    | 2.50                     | 0.46              |
| 1:A:95:A:H2'     | 1:A:96:G:H8    | 1.79                     | 0.46              |
| 1:A:102:C:H2'    | 1:A:103:C:C6   | 2.51                     | 0.46              |
| 1:A:110:U:H2'    | 1:A:111:A:C8   | 2.50                     | 0.46              |
| 1:A:207:C:H2'    | 1:A:208:U:O4'  | 2.16                     | 0.46              |
| 1:A:37:G:N1      | 1:A:38:G:C5    | 2.84                     | 0.45              |
| 1:A:116:A:H2'    | 1:A:117:G:C8   | 2.50                     | 0.45              |
| 1:A:14:G:C2'     | 1:A:401:A:H61  | 2.29                     | 0.45              |
| 1:A:135:U:H2'    | 1:A:136:G:O4'  | 2.14                     | 0.45              |
| 1:A:214:G:H1     | 1:A:219:C:H42  | 1.63                     | 0.45              |
| 1:A:38:G:H2'     | 1:A:39:C:C6    | 2.51                     | 0.45              |
| 1:A:24:U:H5''    | 2:B:3:LYS:HE2  | 1.99                     | 0.45              |
| 1:A:110:U:H2'    | 1:A:111:A:H8   | 1.81                     | 0.45              |
| 1:A:178:A:C4     | 1:A:180:U:C4   | 3.05                     | 0.45              |
| 1:A:222:U:H2'    | 1:A:223:A:H8   | 1.81                     | 0.45              |
| 1:A:350:A:H3'    | 1:A:351:G:O4'  | 2.17                     | 0.45              |
| 2:B:111:LEU:HD12 | 2:B:111:LEU:HA | 1.86                     | 0.45              |
| 1:A:284:C:H2'    | 1:A:285:G:O4'  | 2.17                     | 0.45              |
| 1:A:167:G:H2'    | 1:A:168:A:C8   | 2.52                     | 0.44              |
| 1:A:144:G:C2     | 1:A:145:G:H1'  | 2.52                     | 0.44              |
| 1:A:201:A:C4     | 1:A:231:A:H2   | 2.35                     | 0.44              |
| 1:A:201:A:H4'    | 1:A:202:C:H6   | 1.82                     | 0.44              |
| 1:A:364:A:H2'    | 1:A:365:G:O4'  | 2.18                     | 0.44              |
| 1:A:9:U:H2'      | 1:A:10:G:H8    | 1.82                     | 0.44              |
| 1:A:277:A:H61    | 1:A:391:C:H4'  | 1.81                     | 0.44              |
| 1:A:337:U:H3'    | 1:A:338:G:H5'  | 1.99                     | 0.44              |
| 1:A:365:G:H2'    | 1:A:365:G:N3   | 2.33                     | 0.44              |
| 2:B:56:VAL:HA    | 2:B:59:ARG:NH1 | 2.32                     | 0.44              |
| 1:A:165:G:H3'    | 1:A:166:G:C8   | 2.52                     | 0.44              |
| 1:A:172:G:H5''   | 1:A:216:A:N6   | 2.22                     | 0.44              |
| 1:A:230:G:C2     | 1:A:231:A:C4   | 3.06                     | 0.44              |
| 1:A:352:U:H2'    | 1:A:353:A:C8   | 2.53                     | 0.44              |
| 1:A:360:G:H3'    | 1:A:361:C:H6   | 1.82                     | 0.44              |
| 1:A:115:C:H2'    | 1:A:116:A:C8   | 2.51                     | 0.44              |
| 1:A:206:G:H1'    | 1:A:207:C:C5   | 2.48                     | 0.44              |
| 1:A:220:C:H2'    | 1:A:221:U:H6   | 1.79                     | 0.44              |
| 2:B:37:GLU:CD    | 2:B:37:GLU:H   | 2.26                     | 0.44              |
| 1:A:335:G:OP2    | 2:B:8:LYS:NZ   | 2.49                     | 0.43              |
| 1:A:407:U:H2'    | 1:A:408:G:H8   | 1.81                     | 0.43              |

Continued on next page...

Continued from previous page...

| Atom-1           | Atom-2         | Interatomic distance (Å) | Clash overlap (Å) |
|------------------|----------------|--------------------------|-------------------|
| 2:B:27:GLN:HB3   | 2:B:88:PRO:HG2 | 2.00                     | 0.43              |
| 2:B:1:MET:HE3    | 2:B:1:MET:HB3  | 1.54                     | 0.43              |
| 1:A:134:C:H2'    | 1:A:135:U:C6   | 2.53                     | 0.43              |
| 1:A:214:G:H2'    | 1:A:215:G:C8   | 2.53                     | 0.43              |
| 1:A:396:C:H2'    | 1:A:397:U:C6   | 2.53                     | 0.43              |
| 1:A:114:G:H2'    | 1:A:115:C:H6   | 1.83                     | 0.43              |
| 1:A:198:G:O2'    | 1:A:227:G:N2   | 2.51                     | 0.43              |
| 1:A:402:G:C2'    | 1:A:403:A:H5'  | 2.48                     | 0.43              |
| 1:A:56:U:H2'     | 1:A:57:G:H8    | 1.83                     | 0.43              |
| 2:B:4:LYS:HE2    | 2:B:4:LYS:HB2  | 1.75                     | 0.43              |
| 2:B:72:LYS:HE3   | 2:B:72:LYS:HB3 | 1.67                     | 0.43              |
| 1:A:197:A:N1     | 1:A:232:A:N6   | 2.66                     | 0.43              |
| 1:A:363:A:O2'    | 1:A:364:A:O4'  | 2.33                     | 0.43              |
| 1:A:59:U:HO2'    | 1:A:258:C:HO2' | 1.65                     | 0.43              |
| 1:A:82:A:H3'     | 1:A:83:G:H8    | 1.83                     | 0.43              |
| 1:A:85:G:H2'     | 1:A:87:U:C4    | 2.53                     | 0.43              |
| 1:A:281:U:H2'    | 1:A:282:C:H6   | 1.83                     | 0.43              |
| 1:A:358:G:H1     | 1:A:366:C:H42  | 1.66                     | 0.43              |
| 1:A:146:A:N7     | 1:A:180:U:C4   | 2.87                     | 0.42              |
| 1:A:36:C:H6      | 1:A:36:C:P     | 2.42                     | 0.42              |
| 1:A:37:G:C2      | 1:A:38:G:C8    | 3.07                     | 0.42              |
| 1:A:48:A:N1      | 1:A:50:A:H1'   | 2.34                     | 0.42              |
| 1:A:321:G:C2     | 1:A:322:C:C2   | 3.08                     | 0.42              |
| 2:B:105:LEU:HD23 | 2:B:105:LEU:HA | 1.85                     | 0.42              |
| 1:A:334:A:H4'    | 1:A:335:G:OP1  | 2.19                     | 0.42              |
| 1:A:405:C:C2     | 1:A:406:A:C8   | 3.08                     | 0.42              |
| 1:A:31:G:N1      | 1:A:37:G:C5    | 2.87                     | 0.42              |
| 1:A:38:G:C6      | 1:A:39:C:C4    | 3.07                     | 0.42              |
| 1:A:71:G:O2'     | 1:A:294:G:N2   | 2.52                     | 0.42              |
| 1:A:104:A:H2'    | 1:A:105:U:O4'  | 2.20                     | 0.42              |
| 1:A:206:G:H1     | 1:A:232:A:HO2' | 1.58                     | 0.42              |
| 1:A:213:G:H2'    | 1:A:214:G:C8   | 2.55                     | 0.42              |
| 1:A:221:U:H2'    | 1:A:222:U:C6   | 2.55                     | 0.42              |
| 1:A:123:C:H2'    | 1:A:124:U:O4'  | 2.19                     | 0.42              |
| 1:A:269:G:H3'    | 1:A:270:U:H6   | 1.84                     | 0.42              |
| 1:A:308:A:H2'    | 1:A:309:C:C6   | 2.54                     | 0.42              |
| 1:A:355:G:H2'    | 1:A:356:A:C8   | 2.54                     | 0.42              |
| 1:A:364:A:H3'    | 1:A:364:A:P    | 2.60                     | 0.42              |
| 1:A:404:G:C6     | 1:A:405:C:C4   | 3.08                     | 0.42              |
| 1:A:137:A:H1'    | 1:A:240:A:H61  | 1.83                     | 0.42              |
| 1:A:62:C:H2'     | 1:A:63:A:H8    | 1.85                     | 0.42              |

Continued on next page...

Continued from previous page...

| Atom-1          | Atom-2         | Interatomic distance (Å) | Clash overlap (Å) |
|-----------------|----------------|--------------------------|-------------------|
| 1:A:229:G:N3    | 1:A:230:G:N2   | 2.68                     | 0.42              |
| 1:A:31:G:N2     | 1:A:32:G:H22   | 2.17                     | 0.42              |
| 1:A:172:G:OP1   | 1:A:216:A:N6   | 2.53                     | 0.42              |
| 1:A:317:G:O6    | 1:A:321:G:C2   | 2.73                     | 0.42              |
| 1:A:7:C:H2'     | 1:A:8:A:H8     | 1.85                     | 0.42              |
| 1:A:208:U:H2'   | 1:A:209:C:O4'  | 2.20                     | 0.42              |
| 1:A:317:G:C5    | 1:A:318:C:N3   | 2.87                     | 0.42              |
| 1:A:349:G:H22   | 1:A:350:A:H62  | 1.65                     | 0.41              |
| 1:A:363:A:C2'   | 1:A:364:A:C1'  | 2.93                     | 0.41              |
| 1:A:380:A:C4    | 1:A:381:A:C8   | 3.08                     | 0.41              |
| 1:A:39:C:H2'    | 1:A:40:C:C6    | 2.55                     | 0.41              |
| 1:A:353:A:H3'   | 1:A:354:C:C6   | 2.55                     | 0.41              |
| 2:B:27:GLN:HA   | 2:B:86:ARG:HB2 | 2.01                     | 0.41              |
| 1:A:316:C:H2'   | 1:A:317:G:C8   | 2.54                     | 0.41              |
| 1:A:379:G:C3'   | 1:A:380:A:H5'' | 2.51                     | 0.41              |
| 1:A:14:G:H2'    | 1:A:385:A:N1   | 2.36                     | 0.41              |
| 1:A:111:A:H2'   | 1:A:112:G:C8   | 2.55                     | 0.41              |
| 1:A:283:C:H2'   | 1:A:284:C:C6   | 2.55                     | 0.41              |
| 1:A:356:A:H3'   | 1:A:357:G:C8   | 2.56                     | 0.41              |
| 2:B:67:CYS:SG   | 2:B:98:LYS:HA  | 2.60                     | 0.41              |
| 1:A:144:G:H8    | 1:A:144:G:H5'' | 1.86                     | 0.41              |
| 1:A:223:A:H2'   | 1:A:224:G:C8   | 2.55                     | 0.41              |
| 1:A:239:A:H5'   | 1:A:240:A:OP1  | 2.20                     | 0.41              |
| 1:A:263:A:OP2   | 1:A:263:A:H8   | 2.03                     | 0.41              |
| 1:A:36:C:H2'    | 1:A:37:G:H8    | 1.83                     | 0.41              |
| 1:A:218:A:H3'   | 1:A:219:C:C6   | 2.55                     | 0.41              |
| 2:B:2:LYS:HE2   | 2:B:2:LYS:HB3  | 1.55                     | 0.41              |
| 1:A:178:A:C5    | 1:A:180:U:C5   | 3.08                     | 0.41              |
| 1:A:33:U:H4'    | 1:A:34:U:O4'   | 2.20                     | 0.41              |
| 1:A:59:U:H2'    | 1:A:60:C:H6    | 1.86                     | 0.41              |
| 1:A:82:A:H3'    | 1:A:83:G:C8    | 2.56                     | 0.41              |
| 1:A:158:U:H2'   | 1:A:159:C:O4'  | 2.20                     | 0.41              |
| 1:A:166:G:H2'   | 1:A:167:G:H8   | 1.85                     | 0.41              |
| 1:A:230:G:N3    | 1:A:230:G:C2'  | 2.84                     | 0.41              |
| 1:A:270:U:C2'   | 1:A:271:A:H5'' | 2.51                     | 0.41              |
| 1:A:329:U:H5''  | 1:A:329:U:H6   | 1.86                     | 0.41              |
| 2:B:75:VAL:HG13 | 2:B:81:TYR:HE2 | 1.86                     | 0.41              |
| 1:A:262:A:H8    | 1:A:262:A:O5'  | 2.03                     | 0.40              |
| 1:A:300:A:H2'   | 1:A:301:G:H5'  | 2.02                     | 0.40              |
| 1:A:19:A:H2'    | 1:A:20:U:C6    | 2.56                     | 0.40              |
| 1:A:144:G:C6    | 1:A:145:G:C4   | 3.08                     | 0.40              |

Continued on next page...

Continued from previous page...

| Atom-1        | Atom-2        | Interatomic distance (Å) | Clash overlap (Å) |
|---------------|---------------|--------------------------|-------------------|
| 1:A:25:G:C6   | 1:A:43:A:C2   | 3.10                     | 0.40              |
| 1:A:234:G:N3  | 1:A:234:G:C2' | 2.84                     | 0.40              |
| 1:A:320:U:H2' | 1:A:321:G:O4' | 2.22                     | 0.40              |
| 1:A:7:C:H2'   | 1:A:8:A:C8    | 2.56                     | 0.40              |
| 1:A:85:G:H4'  | 1:A:86:U:C6   | 2.57                     | 0.40              |
| 1:A:148:A:N1  | 1:A:177:G:O2' | 2.52                     | 0.40              |
| 1:A:230:G:C4  | 1:A:231:A:C5  | 3.10                     | 0.40              |
| 1:A:369:C:H2' | 1:A:370:U:O4' | 2.22                     | 0.40              |

There are no symmetry-related clashes.

### 5.3 Torsion angles [i](#)

#### 5.3.1 Protein backbone [i](#)

In the following table, the Percentiles column shows the percent Ramachandran outliers of the chain as a percentile score with respect to all PDB entries followed by that with respect to all EM entries.

The Analysed column shows the number of residues for which the backbone conformation was analysed, and the total number of residues.

| Mol | Chain | Analysed      | Favoured  | Allowed | Outliers | Percentiles |
|-----|-------|---------------|-----------|---------|----------|-------------|
| 2   | B     | 114/116 (98%) | 104 (91%) | 10 (9%) | 0        | 100 100     |

There are no Ramachandran outliers to report.

#### 5.3.2 Protein sidechains [i](#)

In the following table, the Percentiles column shows the percent sidechain outliers of the chain as a percentile score with respect to all PDB entries followed by that with respect to all EM entries.

The Analysed column shows the number of residues for which the sidechain conformation was analysed, and the total number of residues.

| Mol | Chain | Analysed     | Rotameric | Outliers | Percentiles |
|-----|-------|--------------|-----------|----------|-------------|
| 2   | B     | 99/99 (100%) | 93 (94%)  | 6 (6%)   | 15 36       |

All (6) residues with a non-rotameric sidechain are listed below:

| Mol | Chain | Res | Type |
|-----|-------|-----|------|
| 2   | B     | 1   | MET  |
| 2   | B     | 2   | LYS  |
| 2   | B     | 4   | LYS  |
| 2   | B     | 9   | LYS  |
| 2   | B     | 27  | GLN  |
| 2   | B     | 72  | LYS  |

Sometimes sidechains can be flipped to improve hydrogen bonding and reduce clashes. All (3) such sidechains are listed below:

| Mol | Chain | Res | Type |
|-----|-------|-----|------|
| 2   | B     | 14  | GLN  |
| 2   | B     | 27  | GLN  |
| 2   | B     | 38  | GLN  |

### 5.3.3 RNA [i](#)

| Mol | Chain | Analysed      | Backbone Outliers | Pucker Outliers |
|-----|-------|---------------|-------------------|-----------------|
| 1   | A     | 416/417 (99%) | 178 (42%)         | 16 (3%)         |

All (178) RNA backbone outliers are listed below:

| Mol | Chain | Res | Type |
|-----|-------|-----|------|
| 1   | A     | 2   | U    |
| 1   | A     | 3   | U    |
| 1   | A     | 6   | U    |
| 1   | A     | 15  | G    |
| 1   | A     | 19  | A    |
| 1   | A     | 22  | G    |
| 1   | A     | 28  | G    |
| 1   | A     | 33  | U    |
| 1   | A     | 35  | U    |
| 1   | A     | 36  | C    |
| 1   | A     | 38  | G    |
| 1   | A     | 40  | C    |
| 1   | A     | 41  | G    |
| 1   | A     | 45  | A    |
| 1   | A     | 46  | G    |
| 1   | A     | 47  | G    |
| 1   | A     | 48  | A    |
| 1   | A     | 49  | A    |
| 1   | A     | 50  | A    |

*Continued on next page...*

*Continued from previous page...*

| Mol | Chain | Res | Type |
|-----|-------|-----|------|
| 1   | A     | 51  | G    |
| 1   | A     | 52  | U    |
| 1   | A     | 53  | C    |
| 1   | A     | 54  | C    |
| 1   | A     | 65  | G    |
| 1   | A     | 67  | U    |
| 1   | A     | 68  | G    |
| 1   | A     | 69  | C    |
| 1   | A     | 71  | G    |
| 1   | A     | 74  | A    |
| 1   | A     | 75  | U    |
| 1   | A     | 76  | G    |
| 1   | A     | 80  | G    |
| 1   | A     | 81  | U    |
| 1   | A     | 85  | G    |
| 1   | A     | 86  | U    |
| 1   | A     | 99  | A    |
| 1   | A     | 101 | U    |
| 1   | A     | 102 | C    |
| 1   | A     | 103 | C    |
| 1   | A     | 106 | A    |
| 1   | A     | 122 | G    |
| 1   | A     | 123 | C    |
| 1   | A     | 126 | U    |
| 1   | A     | 127 | G    |
| 1   | A     | 128 | G    |
| 1   | A     | 129 | C    |
| 1   | A     | 131 | G    |
| 1   | A     | 132 | G    |
| 1   | A     | 134 | C    |
| 1   | A     | 136 | G    |
| 1   | A     | 137 | A    |
| 1   | A     | 138 | C    |
| 1   | A     | 142 | G    |
| 1   | A     | 144 | G    |
| 1   | A     | 145 | G    |
| 1   | A     | 146 | A    |
| 1   | A     | 147 | A    |
| 1   | A     | 148 | A    |
| 1   | A     | 149 | G    |
| 1   | A     | 150 | A    |
| 1   | A     | 151 | A    |

*Continued on next page...*

*Continued from previous page...*

| Mol | Chain | Res | Type |
|-----|-------|-----|------|
| 1   | A     | 152 | C    |
| 1   | A     | 157 | G    |
| 1   | A     | 167 | G    |
| 1   | A     | 168 | A    |
| 1   | A     | 171 | U    |
| 1   | A     | 172 | G    |
| 1   | A     | 173 | G    |
| 1   | A     | 174 | U    |
| 1   | A     | 178 | A    |
| 1   | A     | 179 | U    |
| 1   | A     | 180 | U    |
| 1   | A     | 181 | A    |
| 1   | A     | 182 | C    |
| 1   | A     | 184 | C    |
| 1   | A     | 185 | U    |
| 1   | A     | 186 | G    |
| 1   | A     | 187 | A    |
| 1   | A     | 188 | A    |
| 1   | A     | 190 | G    |
| 1   | A     | 192 | G    |
| 1   | A     | 193 | C    |
| 1   | A     | 202 | C    |
| 1   | A     | 203 | G    |
| 1   | A     | 204 | G    |
| 1   | A     | 205 | A    |
| 1   | A     | 206 | G    |
| 1   | A     | 207 | C    |
| 1   | A     | 209 | C    |
| 1   | A     | 210 | U    |
| 1   | A     | 212 | A    |
| 1   | A     | 213 | G    |
| 1   | A     | 214 | G    |
| 1   | A     | 216 | A    |
| 1   | A     | 219 | C    |
| 1   | A     | 225 | A    |
| 1   | A     | 229 | G    |
| 1   | A     | 231 | A    |
| 1   | A     | 232 | A    |
| 1   | A     | 233 | C    |
| 1   | A     | 234 | G    |
| 1   | A     | 235 | C    |
| 1   | A     | 236 | G    |

*Continued on next page...*

*Continued from previous page...*

| Mol | Chain | Res | Type |
|-----|-------|-----|------|
| 1   | A     | 237 | G    |
| 1   | A     | 238 | U    |
| 1   | A     | 240 | A    |
| 1   | A     | 241 | A    |
| 1   | A     | 242 | C    |
| 1   | A     | 250 | G    |
| 1   | A     | 255 | A    |
| 1   | A     | 256 | A    |
| 1   | A     | 259 | C    |
| 1   | A     | 260 | C    |
| 1   | A     | 263 | A    |
| 1   | A     | 264 | U    |
| 1   | A     | 265 | G    |
| 1   | A     | 266 | A    |
| 1   | A     | 267 | U    |
| 1   | A     | 269 | G    |
| 1   | A     | 271 | A    |
| 1   | A     | 273 | G    |
| 1   | A     | 275 | G    |
| 1   | A     | 278 | C    |
| 1   | A     | 289 | G    |
| 1   | A     | 291 | A    |
| 1   | A     | 292 | A    |
| 1   | A     | 294 | G    |
| 1   | A     | 299 | G    |
| 1   | A     | 304 | A    |
| 1   | A     | 313 | C    |
| 1   | A     | 314 | G    |
| 1   | A     | 317 | G    |
| 1   | A     | 318 | C    |
| 1   | A     | 321 | G    |
| 1   | A     | 326 | C    |
| 1   | A     | 328 | G    |
| 1   | A     | 329 | U    |
| 1   | A     | 330 | A    |
| 1   | A     | 332 | A    |
| 1   | A     | 333 | U    |
| 1   | A     | 334 | A    |
| 1   | A     | 335 | G    |
| 1   | A     | 336 | A    |
| 1   | A     | 337 | U    |
| 1   | A     | 342 | A    |

*Continued on next page...*

Continued from previous page...

| Mol | Chain | Res | Type |
|-----|-------|-----|------|
| 1   | A     | 347 | C    |
| 1   | A     | 349 | G    |
| 1   | A     | 350 | A    |
| 1   | A     | 351 | G    |
| 1   | A     | 358 | G    |
| 1   | A     | 359 | C    |
| 1   | A     | 361 | C    |
| 1   | A     | 362 | A    |
| 1   | A     | 363 | A    |
| 1   | A     | 364 | A    |
| 1   | A     | 365 | G    |
| 1   | A     | 366 | C    |
| 1   | A     | 367 | C    |
| 1   | A     | 368 | G    |
| 1   | A     | 369 | C    |
| 1   | A     | 372 | G    |
| 1   | A     | 373 | C    |
| 1   | A     | 378 | C    |
| 1   | A     | 379 | G    |
| 1   | A     | 380 | A    |
| 1   | A     | 381 | A    |
| 1   | A     | 385 | A    |
| 1   | A     | 387 | A    |
| 1   | A     | 389 | A    |
| 1   | A     | 390 | A    |
| 1   | A     | 395 | G    |
| 1   | A     | 400 | U    |
| 1   | A     | 401 | A    |
| 1   | A     | 402 | G    |
| 1   | A     | 403 | A    |
| 1   | A     | 409 | A    |
| 1   | A     | 410 | U    |
| 1   | A     | 411 | U    |

All (16) RNA pucker outliers are listed below:

| Mol | Chain | Res | Type |
|-----|-------|-----|------|
| 1   | A     | 51  | G    |
| 1   | A     | 52  | U    |
| 1   | A     | 67  | U    |
| 1   | A     | 75  | U    |
| 1   | A     | 91  | G    |

Continued on next page...

Continued from previous page...

| Mol | Chain | Res | Type |
|-----|-------|-----|------|
| 1   | A     | 126 | U    |
| 1   | A     | 204 | G    |
| 1   | A     | 211 | A    |
| 1   | A     | 232 | A    |
| 1   | A     | 235 | C    |
| 1   | A     | 263 | A    |
| 1   | A     | 276 | C    |
| 1   | A     | 333 | U    |
| 1   | A     | 363 | A    |
| 1   | A     | 365 | G    |
| 1   | A     | 389 | A    |

#### 5.4 Non-standard residues in protein, DNA, RNA chains [i](#)

There are no non-standard protein/DNA/RNA residues in this entry.

#### 5.5 Carbohydrates [i](#)

There are no oligosaccharides in this entry.

#### 5.6 Ligand geometry [i](#)

Of 18 ligands modelled in this entry, 18 are monoatomic - leaving 0 for Mogul analysis.

There are no bond length outliers.

There are no bond angle outliers.

There are no chirality outliers.

There are no torsion outliers.

There are no ring outliers.

No monomer is involved in short contacts.

#### 5.7 Other polymers [i](#)

There are no such residues in this entry.

#### 5.8 Polymer linkage issues [i](#)

There are no chain breaks in this entry.

## 6 Map visualisation [i](#)

This section contains visualisations of the EMDB entry EMD-70941. These allow visual inspection of the internal detail of the map and identification of artifacts.

Images derived from a raw map, generated by summing the deposited half-maps, are presented below the corresponding image components of the primary map to allow further visual inspection and comparison with those of the primary map.

### 6.1 Orthogonal projections [i](#)

#### 6.1.1 Primary map

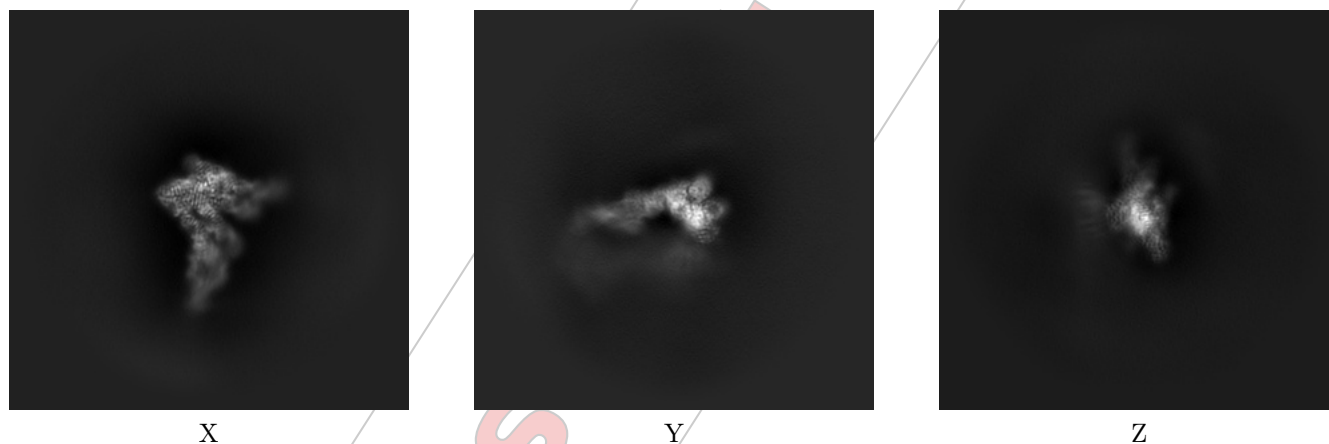

#### 6.1.2 Raw map

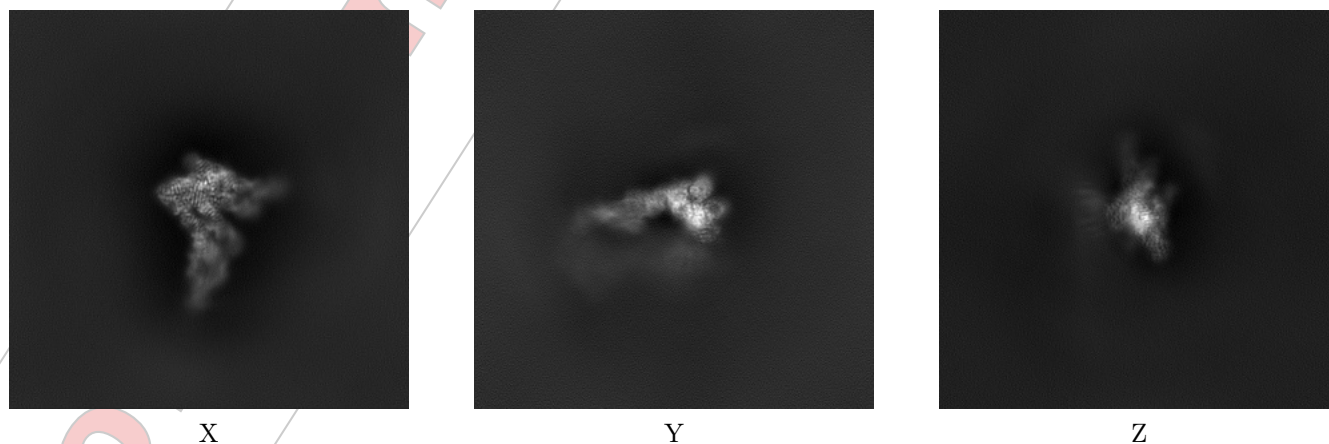

The images above show the map projected in three orthogonal directions.

## 6.2 Central slices [i](#)

### 6.2.1 Primary map

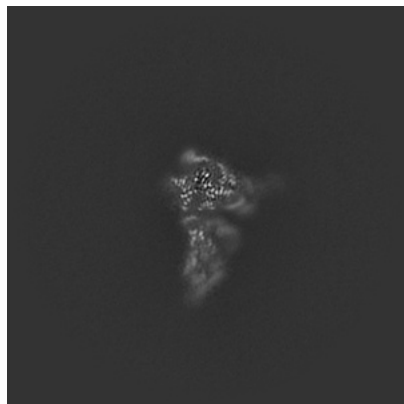

X Index: 200

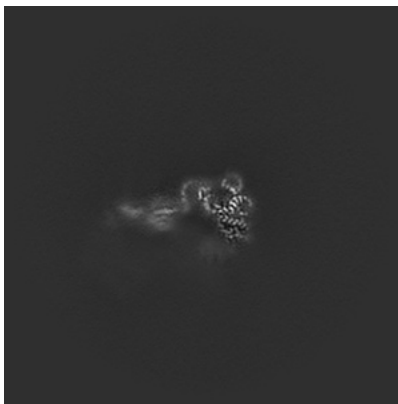

Y Index: 200

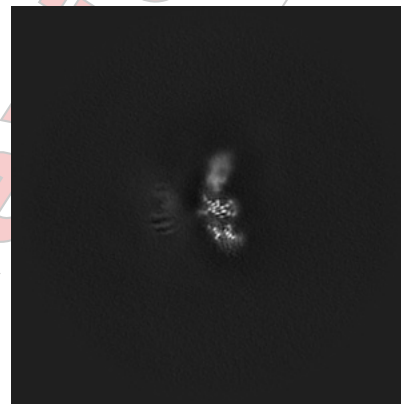

Z Index: 200

### 6.2.2 Raw map

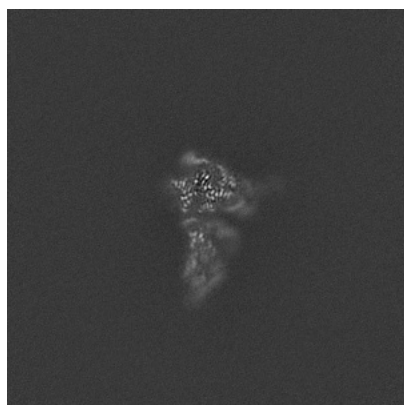

X Index: 200

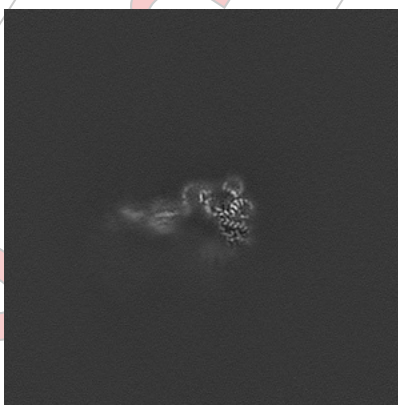

Y Index: 200

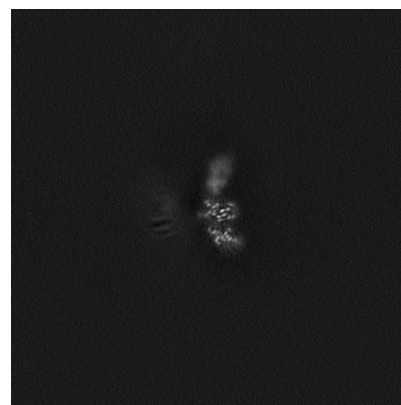

Z Index: 200

The images above show central slices of the map in three orthogonal directions.

## 6.3 Largest variance slices [i](#)

### 6.3.1 Primary map

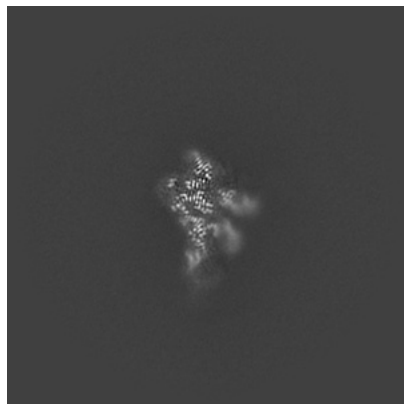

X Index: 207

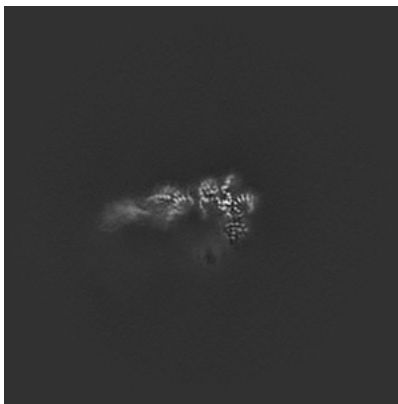

Y Index: 192

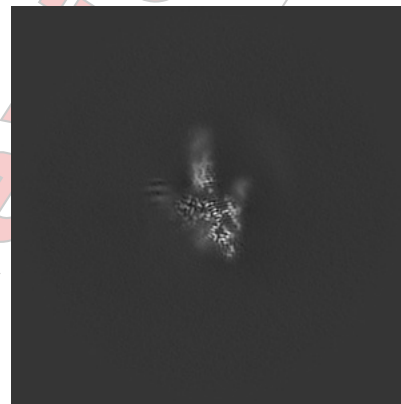

Z Index: 222

### 6.3.2 Raw map

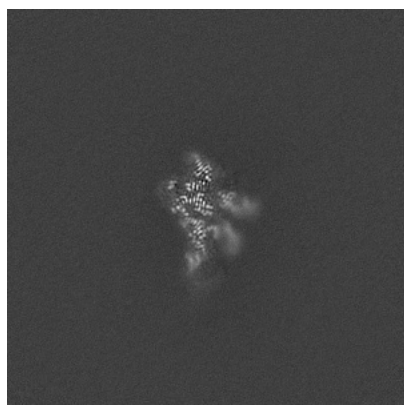

X Index: 207

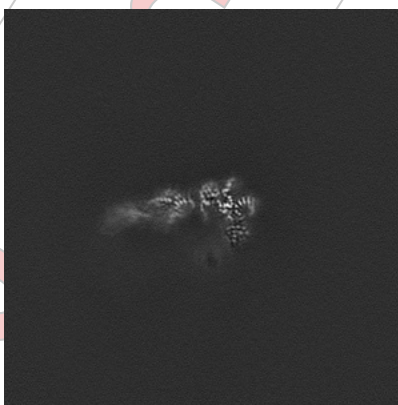

Y Index: 192

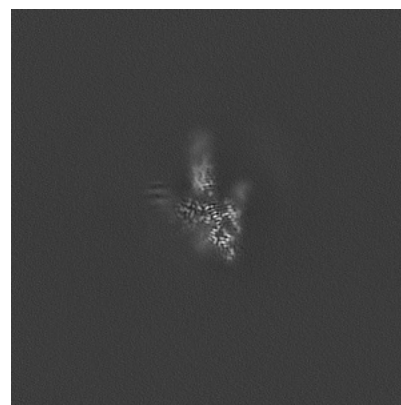

Z Index: 223

The images above show the largest variance slices of the map in three orthogonal directions.

## 6.4 Orthogonal standard-deviation projections (False-color) [i](#)

### 6.4.1 Primary map

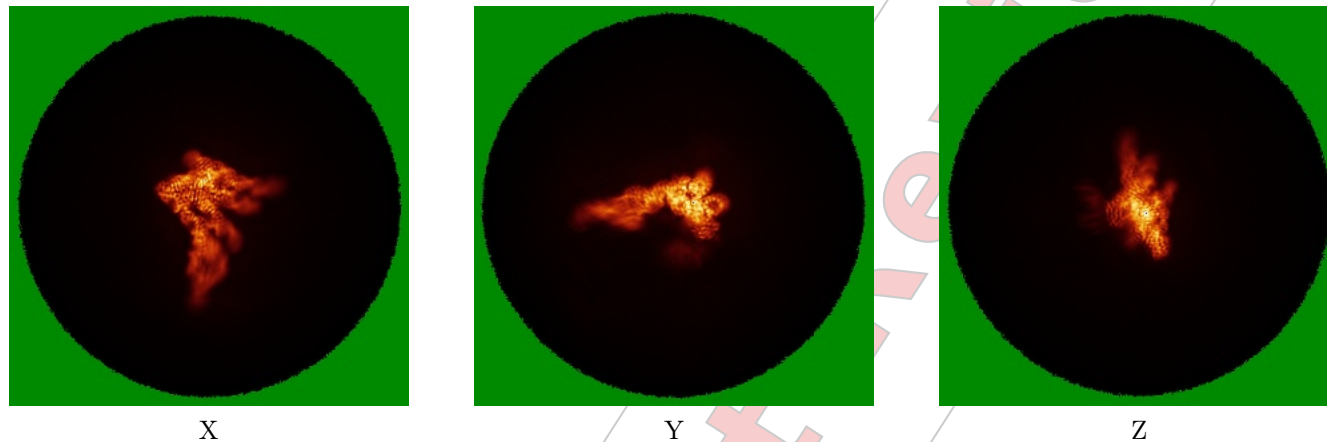

### 6.4.2 Raw map

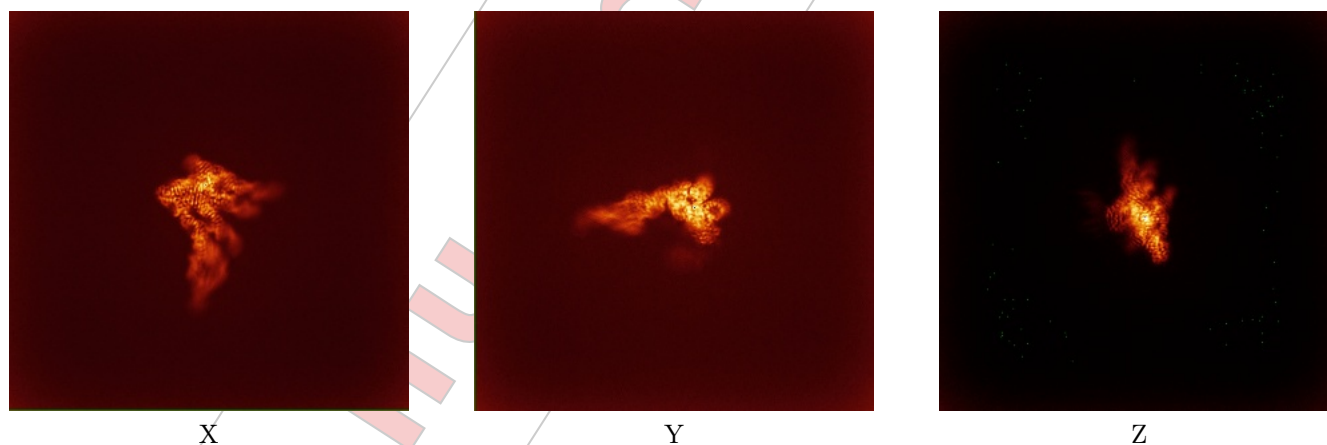

The images above show the map standard deviation projections with false color in three orthogonal directions. Minimum values are shown in green, max in blue, and dark to light orange shades represent small to large values respectively.

## 6.5 Orthogonal surface views [i](#)

### 6.5.1 Primary map

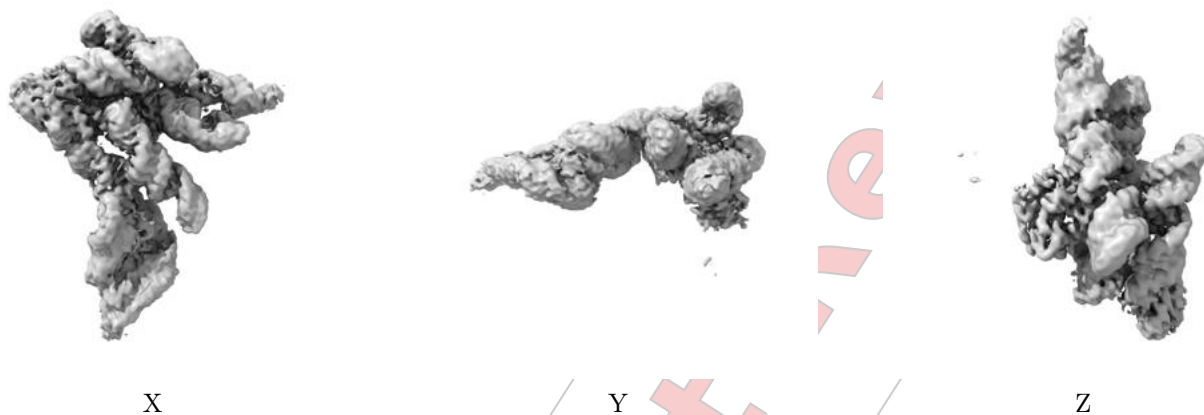

The images above show the 3D surface view of the map at the recommended contour level 0.0519. These images, in conjunction with the slice images, may facilitate assessment of whether an appropriate contour level has been provided.

### 6.5.2 Raw map

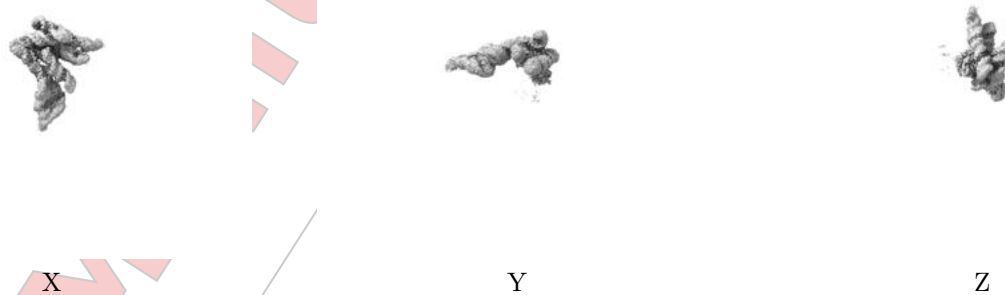

These images show the 3D surface of the raw map. The raw map's contour level was selected so that its surface encloses the same volume as the primary map does at its recommended contour level.

## 6.6 Mask visualisation [i](#)

This section was not generated. No masks/segmentation were deposited.

## 7 Map analysis [i](#)

This section contains the results of statistical analysis of the map.

### 7.1 Map-value distribution [i](#)

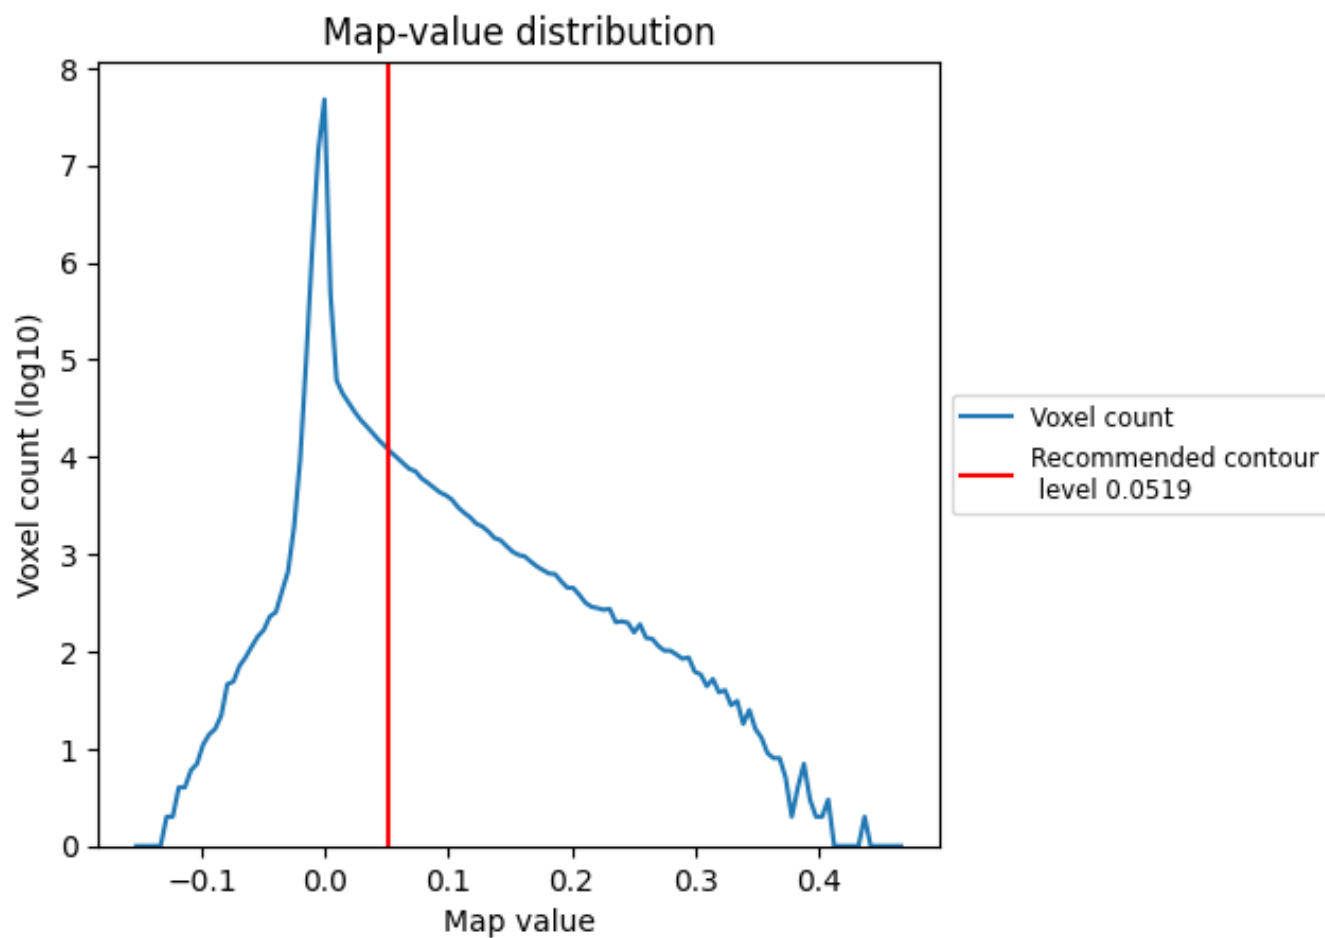

The map-value distribution is plotted in 128 intervals along the x-axis. The y-axis is logarithmic. A spike in this graph at zero usually indicates that the volume has been masked.

## 7.2 Volume estimate [i](#)

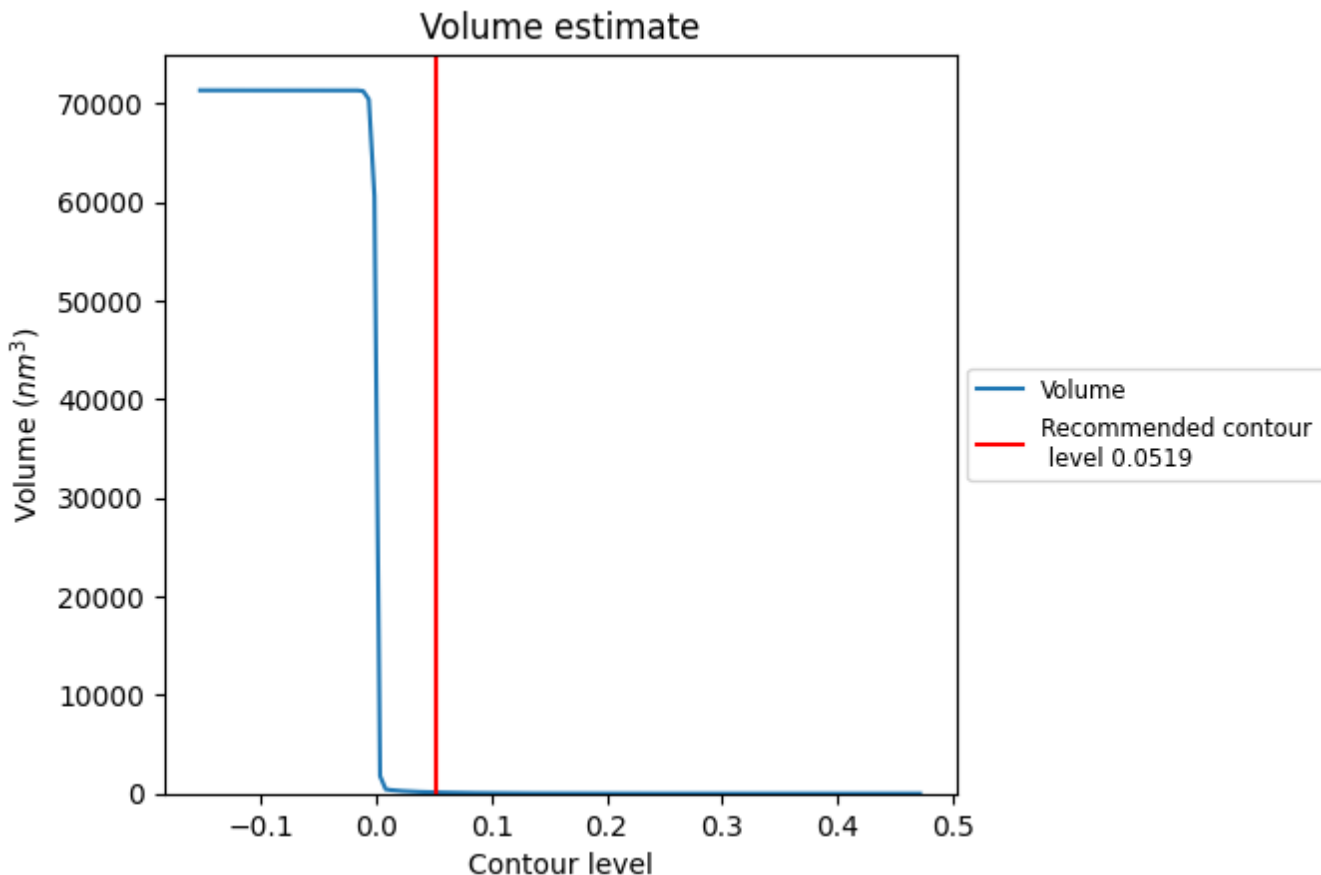

The volume at the recommended contour level is 119  $\text{nm}^3$ ; this corresponds to an approximate mass of 108 kDa.

The volume estimate graph shows how the enclosed volume varies with the contour level. The recommended contour level is shown as a vertical line and the intersection between the line and the curve gives the volume of the enclosed surface at the given level.

7.3 Rotationally averaged power spectrum 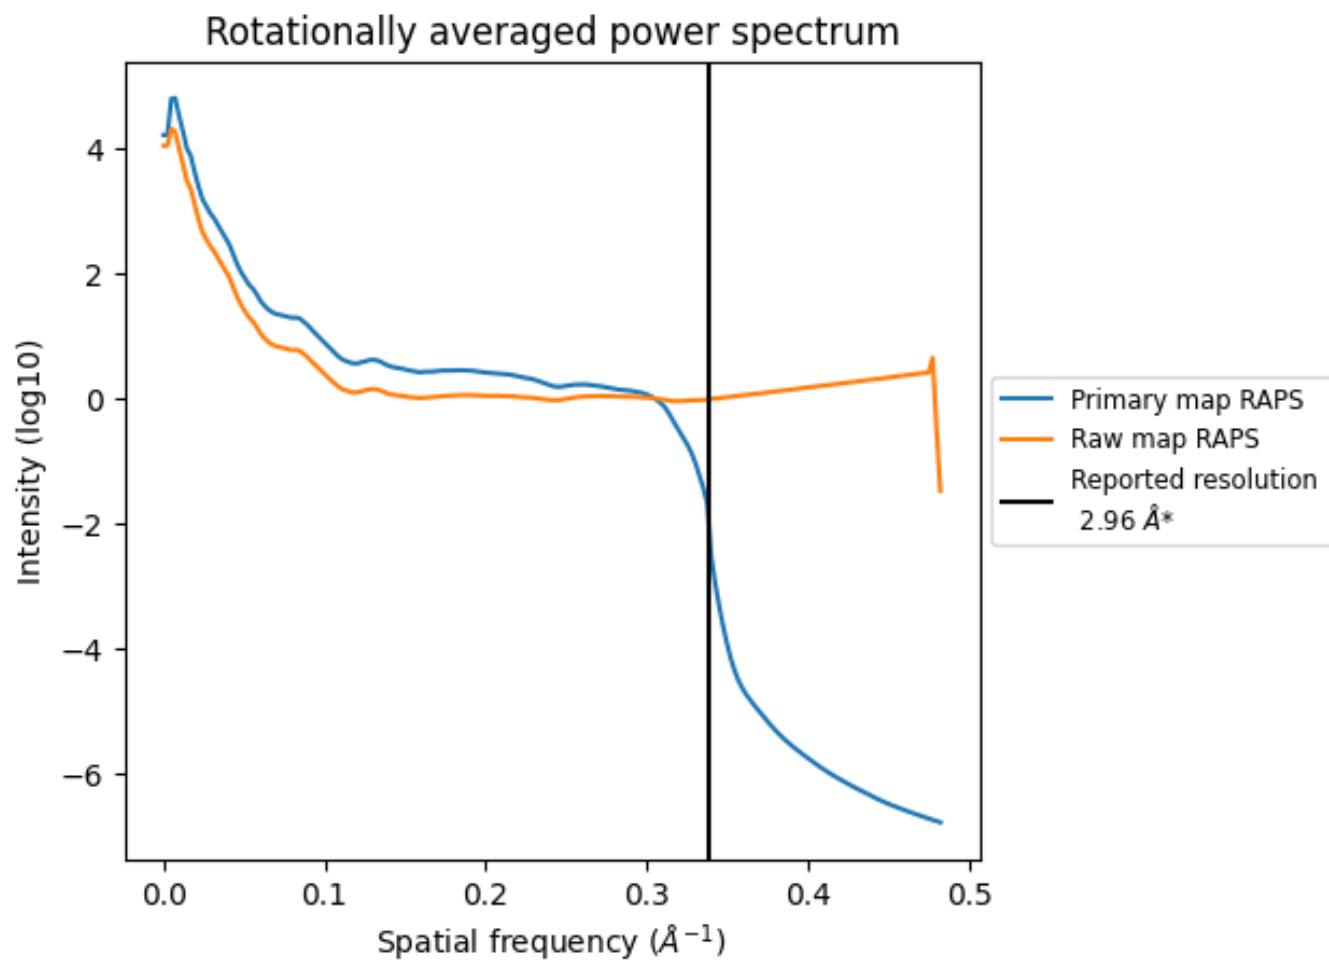

\*Reported resolution corresponds to spatial frequency of 0.338 Å<sup>-1</sup>

## 8 Fourier-Shell correlation [\(i\)](#)

Fourier-Shell Correlation (FSC) is the most commonly used method to estimate the resolution of single-particle and subtomogram-averaged maps. The shape of the curve depends on the imposed symmetry, mask and whether or not the two 3D reconstructions used were processed from a common reference. The reported resolution is shown as a black line. A curve is displayed for the half-bit criterion in addition to lines showing the 0.143 gold standard cut-off and 0.5 cut-off.

### 8.1 FSC [\(i\)](#)

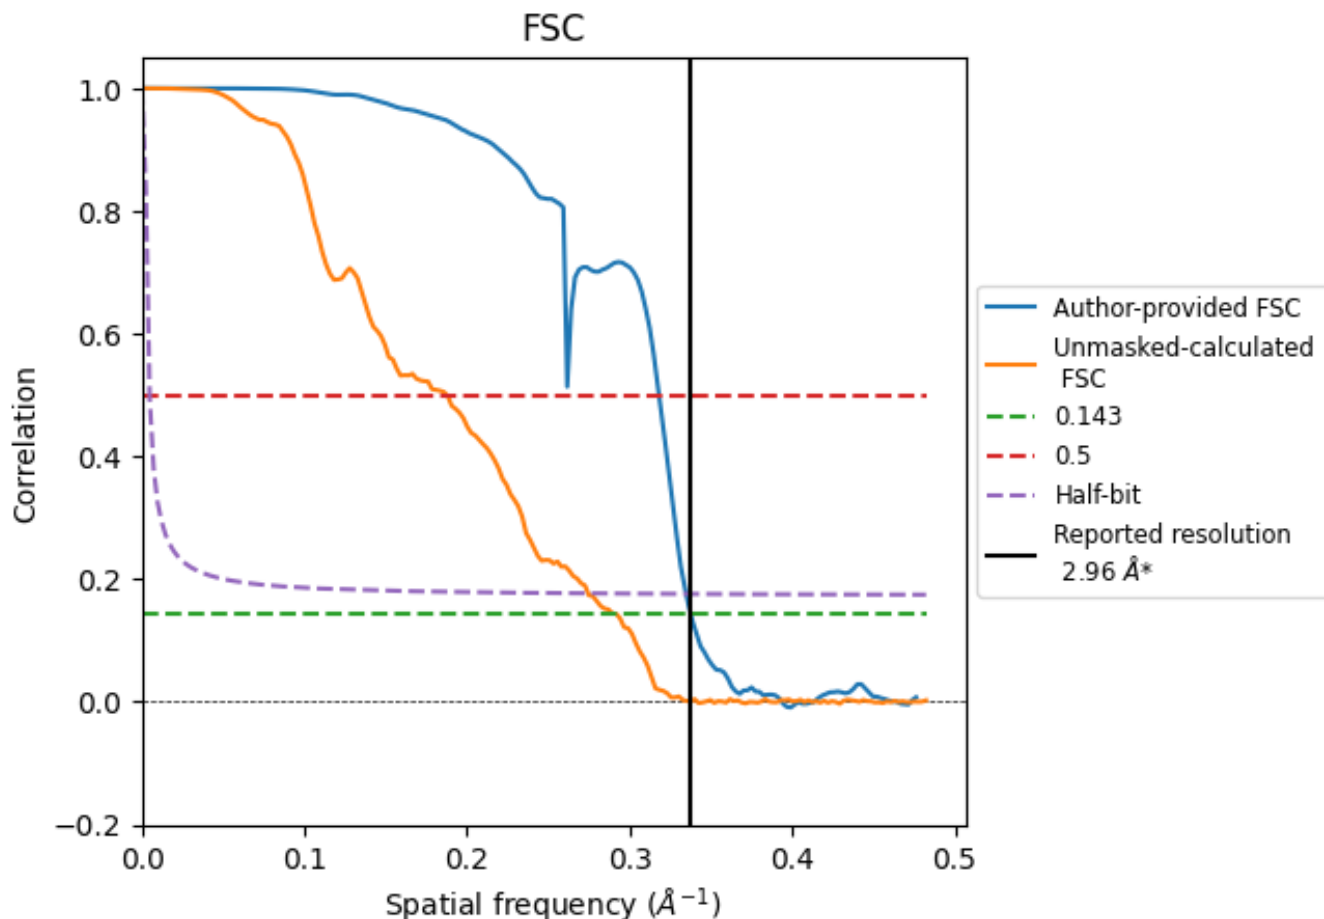

\*Reported resolution corresponds to spatial frequency of 0.338 Å<sup>-1</sup>

## 8.2 Resolution estimates [i](#)

| Resolution estimate (Å)   | Estimation criterion (FSC cut-off) |      |          |
|---------------------------|------------------------------------|------|----------|
|                           | 0.143                              | 0.5  | Half-bit |
| Reported by author        | 2.96                               | -    | -        |
| Author-provided FSC curve | 2.96                               | 3.14 | 2.99     |
| Unmasked-calculated*      | 3.43                               | 5.33 | 3.64     |

\*Resolution estimate based on FSC curve calculated by comparison of deposited half-maps. The value from deposited half-maps intersecting FSC 0.143 CUT-OFF 3.43 differs from the reported value 2.96 by more than 10 %

## 9 Map-model fit [i](#)

This section contains information regarding the fit between EMDB map EMD-70941 and PDB model 9OWR. Per-residue inclusion information can be found in section 3 on page 4.

### 9.1 Map-model overlay [i](#)

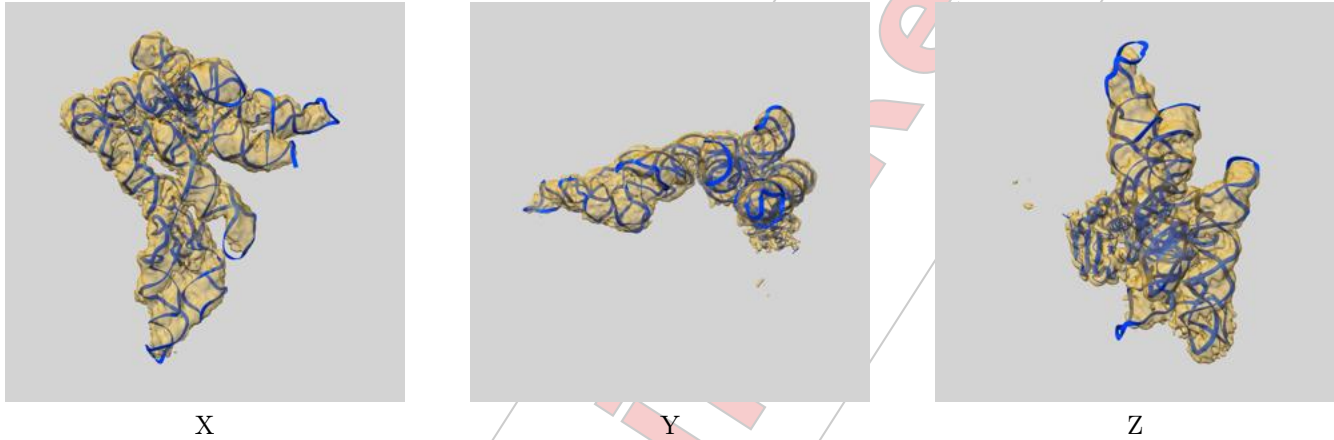

The images above show the 3D surface view of the map at the recommended contour level 0.0519 at 50% transparency in yellow overlaid with a ribbon representation of the model coloured in blue. These images allow for the visual assessment of the quality of fit between the atomic model and the map.

## 9.2 Q-score mapped to coordinate model [\(i\)](#)

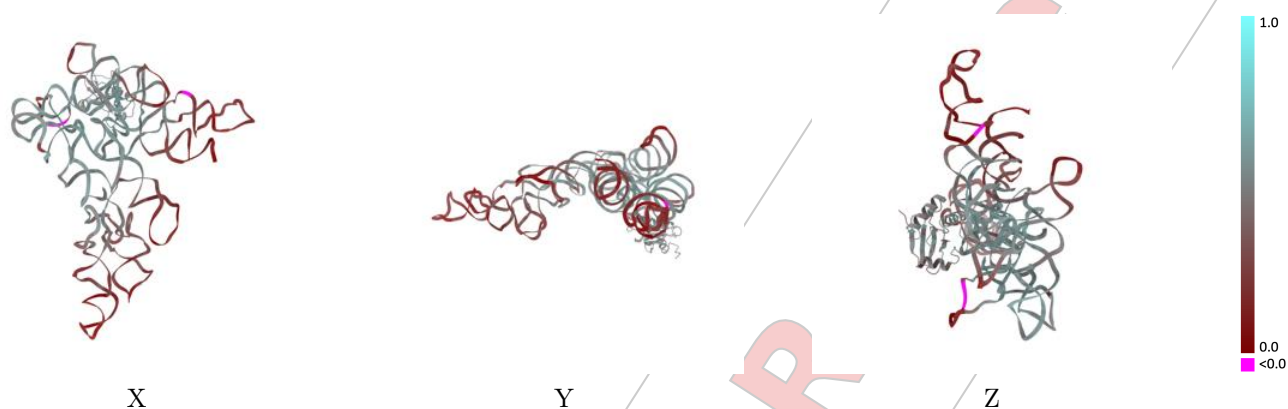

The images above show the model with each residue coloured according to its Q-score. This shows their resolvability in the map with higher Q-score values reflecting better resolvability. Please note: Q-score is calculating the resolvability of atoms, and thus high values are only expected at resolutions at which atoms can be resolved. Low Q-score values may therefore be expected for many entries.

## 9.3 Atom inclusion mapped to coordinate model [\(i\)](#)

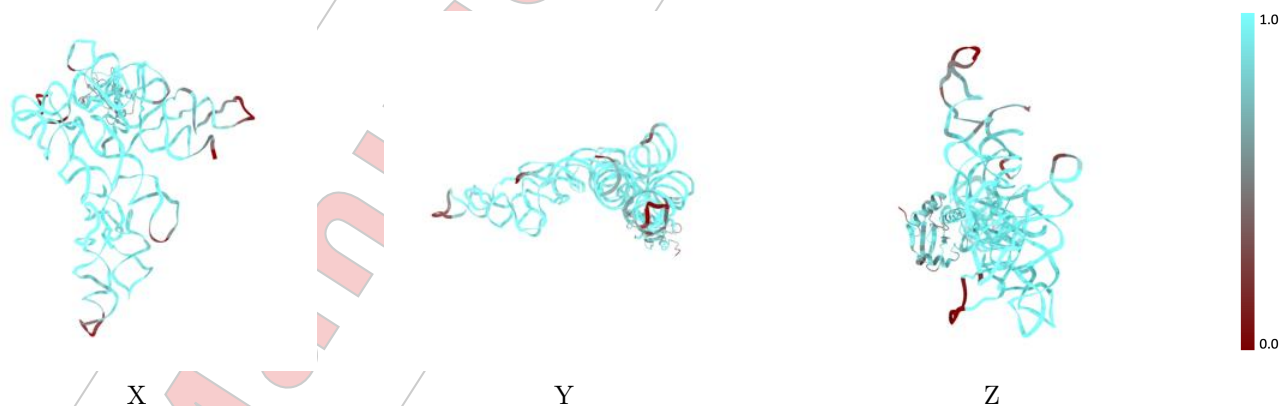

The images above show the model with each residue coloured according to its atom inclusion. This shows to what extent they are inside the map at the recommended contour level (0.0519).

## 9.4 Atom inclusion [i](#)

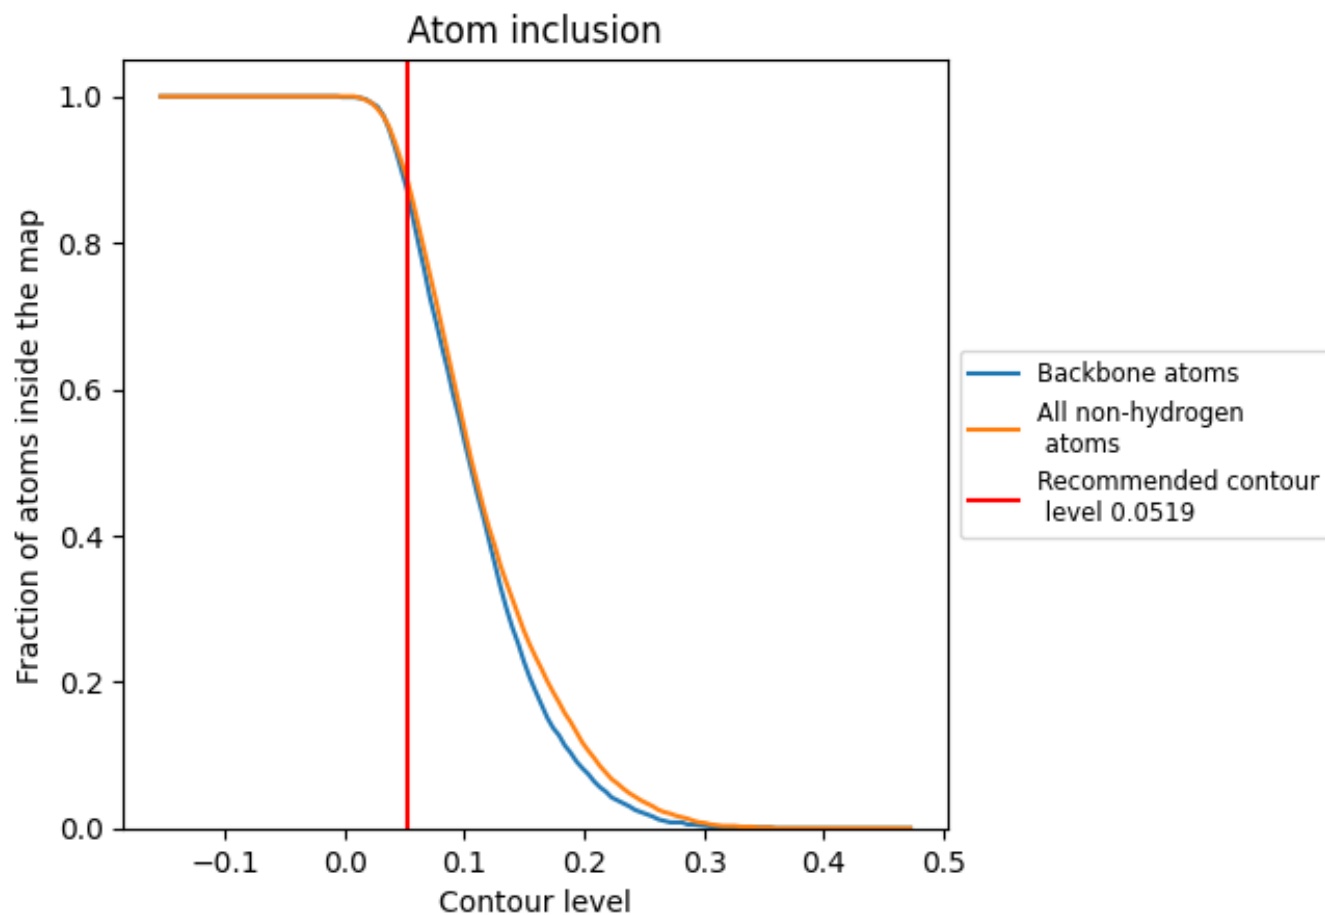

At the recommended contour level, 88% of all backbone atoms, 89% of all non-hydrogen atoms, are inside the map.

## 9.5 Map-model fit summary [i](#)

The table lists the average atom inclusion at the recommended contour level (0.0519) and Q-score for the entire model and for each chain.

| Chain | Atom inclusion                                                                           | Q-score                                                                                  |
|-------|------------------------------------------------------------------------------------------|------------------------------------------------------------------------------------------|
| All   |  0.8900 |  0.3970 |
| A     |  0.8990 |  0.3870 |
| B     |  0.7940 |  0.4950 |

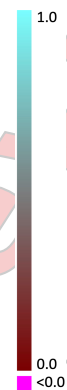



# Full wwPDB EM Validation Report i

Jun 4, 2025 – 11:53 AM EDT

PDB ID : 9OWS / pdb\_00009ows  
EMDB ID : EMD-70942  
Title : Structure of Geobacillus stearothermophilus RNase P holoenzyme in 5 mM Mg<sup>2+</sup>  
Deposited on : 2025-06-02  
Resolution : 2.87 Å (reported)  
Based on initial model : 2A64

**This wwPDB validation report is for manuscript review**

This is a Full wwPDB EM Validation Report.

This report is produced by the wwPDB biocuration pipeline after annotation of the structure.

We welcome your comments at [validation@mail.wwpdb.org](mailto:validation@mail.wwpdb.org)

A user guide is available at

<https://www.wwpdb.org/validation/2017/EMValidationReportHelp>

with specific help available everywhere you see the i symbol.

The types of validation reports are described at

<http://www.wwpdb.org/validation/2017/FAQs#types>.

---

The following versions of software and data (see [references](#) i) were used in the production of this report:

EMDB validation analysis : 0.0.1.dev118  
MolProbity : 4-5-2 with Phenix2.0rc1  
Percentile statistics : 20231227.v01 (using entries in the PDB archive December 27th 2023)  
MapQ : 1.9.13  
Ideal geometry (proteins) : Engh & Huber (2001)  
Ideal geometry (DNA, RNA) : Parkinson et al. (1996)  
Validation Pipeline (wwPDB-VP) : 2.43.1

# 1 Overall quality at a glance i

The following experimental techniques were used to determine the structure:  
*ELECTRON MICROSCOPY*

The reported resolution of this entry is 2.87 Å.

Percentile scores (ranging between 0-100) for global validation metrics of the entry are shown in the following graphic. The table shows the number of entries on which the scores are based.

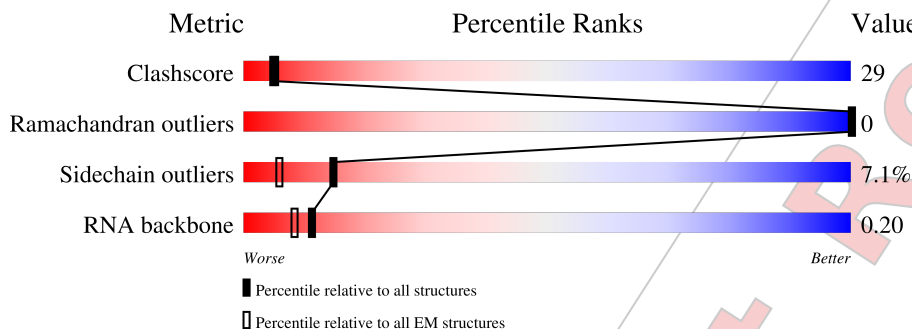

| Metric                | Whole archive (#Entries) | EM structures (#Entries) |
|-----------------------|--------------------------|--------------------------|
| Clashscore            | 210492                   | 15764                    |
| Ramachandran outliers | 207382                   | 16835                    |
| Sidechain outliers    | 206894                   | 16415                    |
| RNA backbone          | 6643                     | 2191                     |

The table below summarises the geometric issues observed across the polymeric chains and their fit to the map. The red, orange, yellow and green segments of the bar indicate the fraction of residues that contain outliers for  $\geq 3$ , 2, 1 and 0 types of geometric quality criteria respectively. A grey segment represents the fraction of residues that are not modelled. The numeric value for each fraction is indicated below the corresponding segment, with a dot representing fractions  $\leq 5\%$ . The upper red bar (where present) indicates the fraction of residues that have poor fit to the EM map (all-atom inclusion  $< 40\%$ ). The numeric value is given above the bar.

| Mol | Chain | Length | Quality of chain |
|-----|-------|--------|------------------|
| 1   | A     | 417    |                  |
| 2   | B     | 116    |                  |

## 2 Entry composition [i](#)

There are 3 unique types of molecules in this entry. The entry contains 9931 atoms, of which 0 are hydrogens and 0 are deuteriums.

In the tables below, the AltConf column contains the number of residues with at least one atom in alternate conformation and the Trace column contains the number of residues modelled with at most 2 atoms.

- Molecule 1 is a RNA chain called RNase P RNA (417-MER).

| Mol | Chain | Residues | Atoms |      |      |      |     | AltConf | Trace |
|-----|-------|----------|-------|------|------|------|-----|---------|-------|
|     |       |          | Total | C    | N    | O    | P   |         |       |
| 1   | A     | 417      | 8962  | 3996 | 1660 | 2889 | 417 | 0       | 0     |

- Molecule 2 is a protein called Ribonuclease P protein component.

| Mol | Chain | Residues | Atoms |     |     |     |   | AltConf | Trace |
|-----|-------|----------|-------|-----|-----|-----|---|---------|-------|
|     |       |          | Total | C   | N   | O   | S |         |       |
| 2   | B     | 116      | 947   | 608 | 174 | 162 | 3 | 0       | 0     |

There are 2 discrepancies between the modelled and reference sequences:

| Chain | Residue | Modelled | Actual | Comment        | Reference      |
|-------|---------|----------|--------|----------------|----------------|
| B     | 0       | GLY      | -      | expression tag | UNP A0A150N245 |
| B     | 64      | ILE      | VAL    | conflict       | UNP A0A150N245 |

- Molecule 3 is MAGNESIUM ION (CCD ID: MG) (formula: Mg) (labeled as "Ligand of Interest" by depositor).

| Mol | Chain | Residues | Atoms |    | AltConf |
|-----|-------|----------|-------|----|---------|
|     |       |          | Total | Mg |         |
| 3   | A     | 22       | 22    | 22 | 0       |

### 3 Residue-property plots

These plots are drawn for all protein, RNA, DNA and oligosaccharide chains in the entry. The first graphic for a chain summarises the proportions of the various outlier classes displayed in the second graphic. The second graphic shows the sequence view annotated by issues in geometry and atom inclusion in map density. Residues are color-coded according to the number of geometric quality criteria for which they contain at least one outlier: green = 0, yellow = 1, orange = 2 and red = 3 or more. A red diamond above a residue indicates a poor fit to the EM map for this residue (all-atom inclusion < 40%). Stretches of 2 or more consecutive residues without any outlier are shown as a green connector. Residues present in the sample, but not in the model, are shown in grey.

- Molecule 1: RNase P RNA (417-MER)

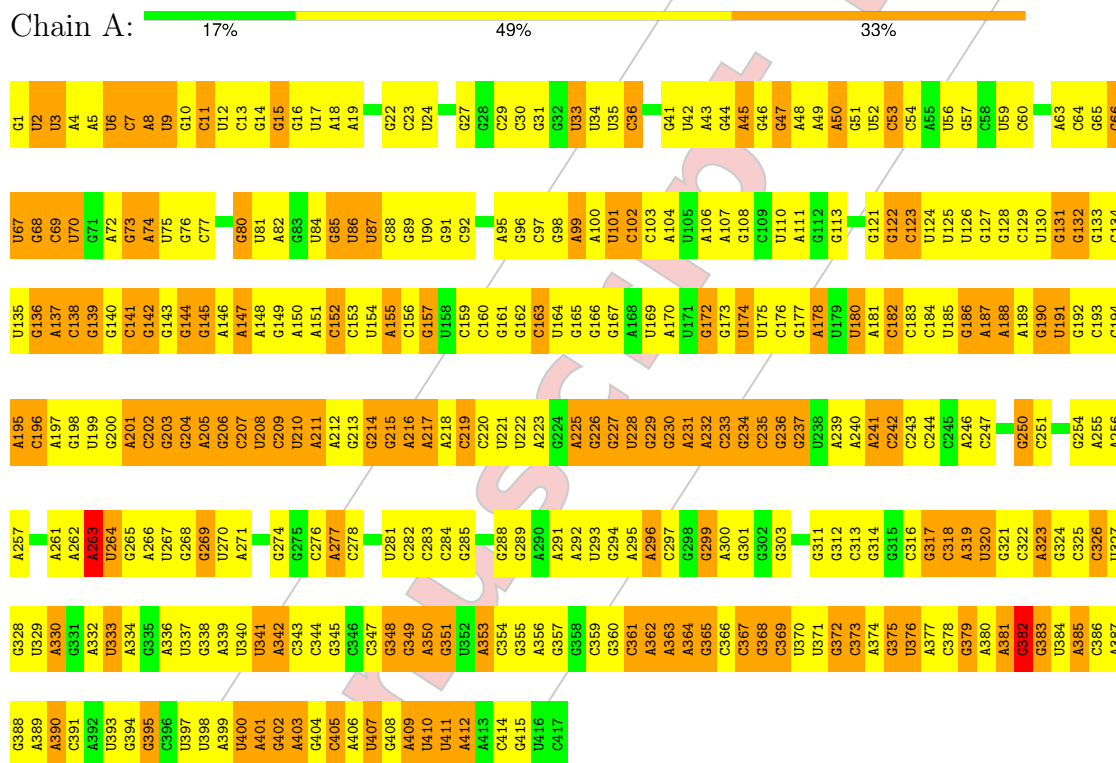

- Molecule 2: Ribonuclease P protein component

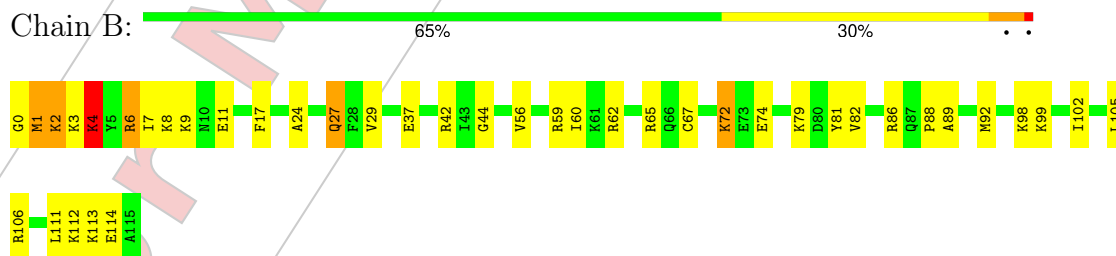

## 4 Experimental information i

| Property                             | Value                                   | Source    |
|--------------------------------------|-----------------------------------------|-----------|
| EM reconstruction method             | SINGLE PARTICLE                         | Depositor |
| Imposed symmetry                     | POINT, Not provided                     |           |
| Number of particles used             | 998359                                  | Depositor |
| Resolution determination method      | FSC 0.143 CUT-OFF                       | Depositor |
| CTF correction method                | PHASE FLIPPING AND AMPLITUDE CORRECTION | Depositor |
| Microscope                           | FEI TALOS ARCTICA                       | Depositor |
| Voltage (kV)                         | 200                                     | Depositor |
| Electron dose ( $e^-/\text{\AA}^2$ ) | 57                                      | Depositor |
| Minimum defocus (nm)                 | 500                                     | Depositor |
| Maximum defocus (nm)                 | 1500                                    | Depositor |
| Magnification                        | Not provided                            |           |
| Image detector                       | GATAN K3 BIOQUANTUM (6k x 4k)           | Depositor |
| Maximum map value                    | 1.086                                   | Depositor |
| Minimum map value                    | -0.313                                  | Depositor |
| Average map value                    | -0.000                                  | Depositor |
| Map value standard deviation         | 0.012                                   | Depositor |
| Recommended contour level            | 0.03                                    | Depositor |
| Map size (Å)                         | 414.72, 414.72, 414.72                  | wwPDB     |
| Map dimensions                       | 400, 400, 400                           | wwPDB     |
| Map angles (°)                       | 90.0, 90.0, 90.0                        | wwPDB     |
| Pixel spacing (Å)                    | 1.0368, 1.0368, 1.0368                  | Depositor |

## 5 Model quality [i](#)

### 5.1 Standard geometry [i](#)

Bond lengths and bond angles in the following residue types are not validated in this section: MG

The Z score for a bond length (or angle) is the number of standard deviations the observed value is removed from the expected value. A bond length (or angle) with  $|Z| > 5$  is considered an outlier worth inspection. RMSZ is the root-mean-square of all Z scores of the bond lengths (or angles).

| Mol | Chain | Bond lengths |         | Bond angles |                 |
|-----|-------|--------------|---------|-------------|-----------------|
|     |       | RMSZ         | # Z  >5 | RMSZ        | # Z  >5         |
| 1   | A     | 0.66         | 0/10038 | 0.98        | 11/15661 (0.1%) |
| 2   | B     | 0.41         | 0/962   | 0.71        | 1/1281 (0.1%)   |
| All | All   | 0.64         | 0/11000 | 0.96        | 12/16942 (0.1%) |

Chiral center outliers are detected by calculating the chiral volume of a chiral center and verifying if the center is modelled as a planar moiety or with the opposite hand. A planarity outlier is detected by checking planarity of atoms in a peptide group, atoms in a mainchain group or atoms of a sidechain that are expected to be planar.

| Mol | Chain | #Chirality outliers | #Planarity outliers |
|-----|-------|---------------------|---------------------|
| 2   | B     | 0                   | 1                   |

There are no bond length outliers.

All (12) bond angle outliers are listed below:

| Mol | Chain | Res | Type | Atoms       | Z     | Observed(°) | Ideal(°) |
|-----|-------|-----|------|-------------|-------|-------------|----------|
| 1   | A     | 299 | G    | O3'-P-O5'   | -7.99 | 92.01       | 104.00   |
| 1   | A     | 14  | G    | O3'-P-O5'   | -6.69 | 93.97       | 104.00   |
| 1   | A     | 277 | A    | C2'-C3'-O3' | -6.54 | 99.69       | 109.50   |
| 2   | B     | 4   | LYS  | N-CA-C      | -5.44 | 104.99      | 111.03   |
| 1   | A     | 263 | A    | P-O3'-C3'   | 5.41  | 128.31      | 120.20   |
| 1   | A     | 44  | G    | C4'-C3'-C2' | -5.33 | 97.27       | 102.60   |
| 1   | A     | 333 | U    | C2'-C3'-O3' | -5.28 | 105.78      | 113.70   |
| 1   | A     | 382 | G    | O3'-P-O5'   | -5.12 | 96.32       | 104.00   |
| 1   | A     | 274 | G    | C4'-C3'-C2' | -5.10 | 97.50       | 102.60   |
| 1   | A     | 263 | A    | C4'-C3'-O3' | 5.09  | 120.64      | 113.00   |
| 1   | A     | 348 | G    | C2'-C3'-O3' | -5.08 | 106.08      | 113.70   |
| 1   | A     | 250 | G    | C4'-C3'-O3' | -5.08 | 105.39      | 113.00   |

There are no chirality outliers.

All (1) planarity outliers are listed below:

| Mol | Chain | Res | Type | Group     |
|-----|-------|-----|------|-----------|
| 2   | B     | 6   | ARG  | Sidechain |

## 5.2 Too-close contacts [i](#)

In the following table, the Non-H and H(model) columns list the number of non-hydrogen atoms and hydrogen atoms in the chain respectively. The H(added) column lists the number of hydrogen atoms added and optimized by MolProbity. The Clashes column lists the number of clashes within the asymmetric unit, whereas Symm-Clashes lists symmetry-related clashes.

| Mol | Chain | Non-H | H(model) | H(added) | Clashes | Symm-Clashes |
|-----|-------|-------|----------|----------|---------|--------------|
| 1   | A     | 8962  | 0        | 4510     | 378     | 0            |
| 2   | B     | 947   | 0        | 1008     | 31      | 0            |
| 3   | A     | 22    | 0        | 0        | 1       | 0            |
| All | All   | 9931  | 0        | 5518     | 406     | 0            |

The all-atom clashscore is defined as the number of clashes found per 1000 atoms (including hydrogen atoms). The all-atom clashscore for this structure is 29.

All (406) close contacts within the same asymmetric unit are listed below, sorted by their clash magnitude.

| Atom-1         | Atom-2        | Interatomic distance (Å) | Clash overlap (Å) |
|----------------|---------------|--------------------------|-------------------|
| 1:A:161:G:H3'  | 1:A:162:G:C8  | 1.51                     | 1.46              |
| 1:A:161:G:H3'  | 1:A:162:G:N7  | 1.26                     | 1.43              |
| 1:A:162:G:O3'  | 1:A:163:C:C5  | 1.85                     | 1.30              |
| 1:A:161:G:C3'  | 1:A:162:G:C8  | 2.17                     | 1.27              |
| 1:A:154:U:H2'  | 1:A:155:A:C8  | 1.78                     | 1.16              |
| 1:A:162:G:O3'  | 1:A:163:C:H5  | 1.27                     | 1.04              |
| 1:A:162:G:O3'  | 1:A:163:C:C6  | 2.14                     | 0.99              |
| 1:A:163:C:C6   | 1:A:163:C:P   | 2.57                     | 0.97              |
| 1:A:161:G:C3'  | 1:A:162:G:N7  | 2.22                     | 0.97              |
| 1:A:349:G:H1   | 1:A:378:C:H42 | 1.11                     | 0.91              |
| 1:A:163:C:P    | 1:A:163:C:H6  | 1.93                     | 0.90              |
| 1:A:162:G:C8   | 1:A:162:G:O5' | 2.25                     | 0.90              |
| 1:A:164:U:C4   | 1:A:165:G:C5  | 2.62                     | 0.87              |
| 1:A:72:A:H2'   | 1:A:73:G:C8   | 2.09                     | 0.87              |
| 1:A:371:U:H5'' | 1:A:372:G:H5' | 1.57                     | 0.86              |
| 1:A:154:U:H2'  | 1:A:155:A:H8  | 1.37                     | 0.86              |
| 1:A:157:G:H1   | 1:A:169:U:H3  | 1.23                     | 0.85              |
| 1:A:164:U:O4   | 1:A:165:G:C6  | 2.28                     | 0.85              |

*Continued on next page...*

Continued from previous page...

| Atom-1        | Atom-2         | Interatomic distance (Å) | Clash overlap (Å) |
|---------------|----------------|--------------------------|-------------------|
| 1:A:180:U:H2' | 1:A:181:A:H8   | 1.39                     | 0.85              |
| 1:A:161:G:C3' | 1:A:162:G:H8   | 1.87                     | 0.83              |
| 1:A:217:A:H2' | 1:A:218:A:C8   | 2.13                     | 0.82              |
| 1:A:161:G:C2' | 1:A:162:G:C8   | 2.63                     | 0.82              |
| 1:A:164:U:C4  | 1:A:165:G:C6   | 2.67                     | 0.82              |
| 1:A:293:U:OP2 | 3:A:511:MG:MG  | 1.25                     | 0.77              |
| 1:A:349:G:H1' | 1:A:350:A:C8   | 2.19                     | 0.77              |
| 1:A:165:G:H3' | 1:A:166:G:H8   | 1.49                     | 0.77              |
| 1:A:47:G:H1   | 1:A:385:A:H62  | 1.31                     | 0.76              |
| 1:A:348:G:H3' | 1:A:349:G:H8   | 1.50                     | 0.76              |
| 1:A:162:G:C8  | 1:A:162:G:P    | 2.79                     | 0.75              |
| 1:A:142:G:C5  | 1:A:189:A:C2   | 2.75                     | 0.75              |
| 1:A:367:C:H2' | 1:A:368:G:C8   | 2.22                     | 0.74              |
| 1:A:199:U:O2  | 1:A:206:G:H4'  | 1.87                     | 0.74              |
| 1:A:393:U:H2' | 1:A:394:G:C8   | 2.21                     | 0.74              |
| 1:A:380:A:H2' | 1:A:381:A:C8   | 2.21                     | 0.74              |
| 1:A:162:G:O2' | 1:A:164:U:C6   | 2.40                     | 0.74              |
| 1:A:184:C:H2' | 1:A:185:U:C6   | 2.25                     | 0.71              |
| 1:A:206:G:H1' | 1:A:207:C:C5   | 2.26                     | 0.70              |
| 1:A:165:G:H3' | 1:A:166:G:C8   | 2.27                     | 0.70              |
| 1:A:348:G:H2' | 1:A:381:A:H61  | 1.56                     | 0.70              |
| 1:A:17:U:H3   | 1:A:342:A:H61  | 1.37                     | 0.69              |
| 1:A:385:A:H8  | 1:A:400:U:HO2' | 1.41                     | 0.69              |
| 1:A:222:U:H2' | 1:A:223:A:H8   | 1.58                     | 0.69              |
| 1:A:161:G:H2' | 1:A:162:G:C8   | 2.27                     | 0.69              |
| 1:A:164:U:H2' | 1:A:165:G:O4'  | 1.92                     | 0.69              |
| 1:A:172:G:H4' | 1:A:217:A:H61  | 1.57                     | 0.69              |
| 1:A:181:A:H3' | 1:A:182:C:H6   | 1.57                     | 0.69              |
| 1:A:213:G:H3' | 1:A:214:G:H8   | 1.57                     | 0.68              |
| 1:A:161:G:H22 | 1:A:164:U:H3'  | 1.58                     | 0.68              |
| 1:A:155:A:C1' | 1:A:217:A:H1'  | 2.23                     | 0.68              |
| 1:A:348:G:H3' | 1:A:349:G:C8   | 2.28                     | 0.68              |
| 1:A:363:A:C8  | 1:A:363:A:H5'' | 2.28                     | 0.67              |
| 1:A:89:G:H2'  | 1:A:90:U:C6    | 2.28                     | 0.67              |
| 1:A:162:G:H1' | 1:A:164:U:C6   | 2.30                     | 0.67              |
| 1:A:203:G:C4  | 1:A:205:A:H1'  | 2.30                     | 0.67              |
| 1:A:162:G:O5' | 1:A:162:G:H8   | 1.76                     | 0.66              |
| 1:A:241:A:H2' | 1:A:242:C:C6   | 2.29                     | 0.66              |
| 1:A:164:U:O4  | 1:A:165:G:O6   | 2.13                     | 0.66              |
| 1:A:155:A:H1' | 1:A:217:A:H1'  | 1.76                     | 0.66              |
| 1:A:190:G:H2' | 1:A:191:U:O4'  | 1.97                     | 0.65              |

Continued on next page...

Continued from previous page...

| Atom-1         | Atom-2          | Interatomic distance (Å) | Clash overlap (Å) |
|----------------|-----------------|--------------------------|-------------------|
| 1:A:146:A:H2'  | 1:A:147:A:O4'   | 1.97                     | 0.65              |
| 1:A:122:G:H3'  | 1:A:123:C:H5''  | 1.78                     | 0.65              |
| 2:B:0:GLY:HA2  | 2:B:65:ARG:HB3  | 1.79                     | 0.65              |
| 1:A:162:G:O4'  | 1:A:164:U:C5    | 2.49                     | 0.65              |
| 1:A:180:U:H2'  | 1:A:181:A:C8    | 2.27                     | 0.65              |
| 1:A:162:G:C1'  | 1:A:164:U:C5    | 2.80                     | 0.64              |
| 1:A:230:G:H21  | 1:A:231:A:H2'   | 1.62                     | 0.64              |
| 1:A:66:G:H2'   | 1:A:67:U:O2     | 1.97                     | 0.64              |
| 1:A:162:G:H8   | 1:A:162:G:P     | 2.19                     | 0.64              |
| 1:A:349:G:H1'  | 1:A:350:A:H8    | 1.62                     | 0.64              |
| 1:A:222:U:H2'  | 1:A:223:A:C8    | 2.32                     | 0.64              |
| 1:A:161:G:N2   | 1:A:165:G:C8    | 2.66                     | 0.64              |
| 1:A:186:G:H8   | 1:A:186:G:H5''  | 1.62                     | 0.64              |
| 1:A:349:G:H1   | 1:A:378:C:N4    | 1.90                     | 0.64              |
| 1:A:45:A:H62   | 2:B:62:ARG:HH22 | 1.47                     | 0.63              |
| 1:A:110:U:H2'  | 1:A:111:A:C8    | 2.33                     | 0.63              |
| 1:A:206:G:H1'  | 1:A:207:C:H5    | 1.61                     | 0.63              |
| 1:A:221:U:H2'  | 1:A:222:U:C6    | 2.33                     | 0.63              |
| 1:A:69:C:H2'   | 1:A:70:U:C6     | 2.33                     | 0.63              |
| 1:A:67:U:H4'   | 1:A:68:G:OP1    | 1.99                     | 0.63              |
| 1:A:141:C:H3'  | 1:A:142:G:H5''  | 1.80                     | 0.62              |
| 1:A:379:G:N2   | 1:A:380:A:H62   | 1.98                     | 0.62              |
| 2:B:6:ARG:HD2  | 2:B:8:LYS:HD3   | 1.81                     | 0.62              |
| 1:A:163:C:C5   | 1:A:163:C:P     | 2.88                     | 0.62              |
| 2:B:56:VAL:O   | 2:B:60:ILE:HG12 | 1.98                     | 0.62              |
| 1:A:59:U:H2'   | 1:A:60:C:C6     | 2.34                     | 0.62              |
| 1:A:45:A:H62   | 2:B:62:ARG:NH2  | 1.96                     | 0.62              |
| 1:A:130:U:H2'  | 1:A:131:G:C8    | 2.35                     | 0.62              |
| 1:A:163:C:C6   | 1:A:163:C:OP1   | 2.51                     | 0.62              |
| 1:A:15:G:N2    | 1:A:345:G:H1'   | 2.15                     | 0.61              |
| 1:A:56:U:O2    | 1:A:100:A:H2    | 1.83                     | 0.61              |
| 1:A:199:U:H2'  | 1:A:200:G:O4'   | 2.01                     | 0.61              |
| 1:A:164:U:N3   | 1:A:165:G:C5    | 2.69                     | 0.61              |
| 1:A:7:C:H2'    | 1:A:8:A:C8      | 2.36                     | 0.61              |
| 1:A:380:A:C2   | 1:A:381:A:C5    | 2.89                     | 0.60              |
| 1:A:9:U:H2'    | 1:A:10:G:C8     | 2.37                     | 0.60              |
| 1:A:161:G:N2   | 1:A:164:U:C6    | 2.69                     | 0.60              |
| 1:A:194:C:H5'' | 1:A:195:A:H5'   | 1.83                     | 0.60              |
| 1:A:226:G:H3'  | 1:A:227:G:H8    | 1.67                     | 0.59              |
| 2:B:89:ALA:HA  | 2:B:92:MET:SD   | 2.42                     | 0.59              |
| 1:A:409:A:H3'  | 1:A:410:U:C6    | 2.38                     | 0.59              |

Continued on next page...

*Continued from previous page...*

| Atom-1        | Atom-2         | Interatomic distance (Å) | Clash overlap (Å) |
|---------------|----------------|--------------------------|-------------------|
| 1:A:130:U:H2' | 1:A:131:G:H8   | 1.68                     | 0.59              |
| 1:A:181:A:H3' | 1:A:182:C:C6   | 2.36                     | 0.59              |
| 1:A:348:G:C2' | 1:A:381:A:H61  | 2.15                     | 0.59              |
| 2:B:3:LYS:HD3 | 2:B:8:LYS:HE2  | 1.85                     | 0.59              |
| 1:A:99:A:H2'  | 1:A:100:A:C8   | 2.38                     | 0.58              |
| 1:A:380:A:H2' | 1:A:381:A:H8   | 1.66                     | 0.58              |
| 1:A:68:G:C8   | 1:A:68:G:H5''  | 2.39                     | 0.58              |
| 1:A:181:A:C2  | 1:A:182:C:H1'  | 2.39                     | 0.58              |
| 1:A:360:G:H22 | 1:A:363:A:H5'' | 1.68                     | 0.58              |
| 1:A:88:C:H2'  | 1:A:89:G:C8    | 2.38                     | 0.58              |
| 1:A:59:U:H2'  | 1:A:60:C:H6    | 1.67                     | 0.58              |
| 1:A:200:G:C6  | 1:A:232:A:C5   | 2.92                     | 0.58              |
| 1:A:162:G:O4' | 1:A:164:U:H5   | 1.86                     | 0.58              |
| 1:A:2:U:H2'   | 1:A:3:U:C6     | 2.39                     | 0.58              |
| 1:A:360:G:N2  | 1:A:363:A:H5'' | 2.18                     | 0.57              |
| 1:A:210:U:H3  | 1:A:223:A:H61  | 1.51                     | 0.57              |
| 1:A:230:G:N2  | 1:A:231:A:H2'  | 2.19                     | 0.57              |
| 1:A:206:G:H1  | 1:A:232:A:HO2' | 1.50                     | 0.57              |
| 1:A:16:G:N2   | 1:A:344:C:H1'  | 2.19                     | 0.57              |
| 1:A:161:G:O3' | 1:A:162:G:H8   | 1.87                     | 0.57              |
| 1:A:166:G:C3' | 1:A:167:G:H8   | 2.17                     | 0.57              |
| 1:A:136:G:O3' | 1:A:137:A:H2'  | 2.03                     | 0.57              |
| 1:A:96:G:H3'  | 1:A:97:C:H6    | 1.69                     | 0.57              |
| 1:A:385:A:H1' | 1:A:401:A:C8   | 2.39                     | 0.57              |
| 1:A:166:G:C8  | 1:A:166:G:H5'' | 2.39                     | 0.57              |
| 1:A:88:C:H2'  | 1:A:89:G:H8    | 1.70                     | 0.56              |
| 1:A:186:G:N1  | 1:A:189:A:OP2  | 2.33                     | 0.56              |
| 1:A:123:C:H4' | 1:A:123:C:OP1  | 2.06                     | 0.56              |
| 1:A:162:G:H1' | 1:A:164:U:C5   | 2.40                     | 0.56              |
| 1:A:200:G:N2  | 1:A:232:A:H1'  | 2.21                     | 0.56              |
| 1:A:330:A:H2  | 1:A:390:A:C2   | 2.23                     | 0.56              |
| 1:A:382:G:C8  | 1:A:382:G:H5'' | 2.39                     | 0.56              |
| 1:A:64:C:O2'  | 1:A:82:A:N1    | 2.28                     | 0.56              |
| 1:A:164:U:C5  | 1:A:165:G:N7   | 2.74                     | 0.55              |
| 1:A:374:A:H2' | 1:A:375:G:C8   | 2.41                     | 0.55              |
| 1:A:360:G:H22 | 1:A:363:A:C5'  | 2.19                     | 0.55              |
| 1:A:139:G:N3  | 1:A:188:A:H2   | 2.04                     | 0.55              |
| 1:A:162:G:C1' | 1:A:164:U:C6   | 2.88                     | 0.55              |
| 1:A:162:G:H1' | 1:A:164:U:H6   | 1.71                     | 0.55              |
| 1:A:56:U:H1'  | 1:A:99:A:N1    | 2.22                     | 0.55              |
| 1:A:174:U:H2' | 1:A:175:U:C6   | 2.41                     | 0.55              |

*Continued on next page...*

Continued from previous page...

| Atom-1          | Atom-2          | Interatomic distance (Å) | Clash overlap (Å) |
|-----------------|-----------------|--------------------------|-------------------|
| 1:A:317:G:H1    | 1:A:320:U:H3    | 1.54                     | 0.55              |
| 2:B:106:ARG:HB2 | 2:B:113:LYS:HA  | 1.87                     | 0.55              |
| 1:A:246:A:H2'   | 1:A:247:C:C6    | 2.42                     | 0.55              |
| 1:A:11:C:H2'    | 1:A:12:U:C6     | 2.42                     | 0.54              |
| 1:A:57:G:H4'    | 1:A:101:U:O4    | 2.07                     | 0.54              |
| 1:A:182:C:H2'   | 1:A:183:C:H6    | 1.72                     | 0.54              |
| 1:A:338:G:H2'   | 1:A:339:A:C8    | 2.42                     | 0.54              |
| 1:A:206:G:N3    | 1:A:207:C:N4    | 2.55                     | 0.54              |
| 1:A:72:A:H2'    | 1:A:73:G:H8     | 1.71                     | 0.54              |
| 1:A:161:G:O3'   | 1:A:162:G:C8    | 2.61                     | 0.54              |
| 1:A:204:G:N3    | 1:A:204:G:H2'   | 2.21                     | 0.54              |
| 1:A:85:G:H4'    | 1:A:86:U:C4     | 2.42                     | 0.54              |
| 1:A:56:U:O2     | 1:A:100:A:C2    | 2.61                     | 0.54              |
| 1:A:338:G:H2'   | 1:A:339:A:H8    | 1.72                     | 0.54              |
| 1:A:386:C:O2'   | 1:A:399:A:N3    | 2.37                     | 0.53              |
| 1:A:215:G:N2    | 1:A:217:A:H3'   | 2.23                     | 0.53              |
| 1:A:56:U:O2'    | 1:A:100:A:N1    | 2.37                     | 0.53              |
| 1:A:195:A:OP2   | 1:A:197:A:N6    | 2.40                     | 0.53              |
| 1:A:198:G:H4'   | 1:A:228:U:H4'   | 1.90                     | 0.53              |
| 1:A:8:A:C6      | 1:A:9:U:C4      | 2.97                     | 0.53              |
| 1:A:208:U:H2'   | 1:A:209:C:C6    | 2.44                     | 0.53              |
| 1:A:411:U:H2'   | 1:A:412:A:C8    | 2.43                     | 0.53              |
| 1:A:199:U:H5    | 1:A:227:G:H22   | 1.56                     | 0.53              |
| 1:A:215:G:H22   | 1:A:217:A:H3'   | 1.73                     | 0.53              |
| 1:A:110:U:H2'   | 1:A:111:A:H8    | 1.74                     | 0.53              |
| 1:A:182:C:H2'   | 1:A:183:C:C6    | 2.44                     | 0.53              |
| 1:A:213:G:H3'   | 1:A:214:G:C8    | 2.42                     | 0.53              |
| 1:A:339:A:H2'   | 1:A:340:U:H6    | 1.75                     | 0.53              |
| 1:A:73:G:H22    | 1:A:291:A:H2'   | 1.74                     | 0.52              |
| 1:A:198:G:C4'   | 1:A:228:U:H4'   | 2.38                     | 0.52              |
| 1:A:217:A:C2    | 1:A:218:A:C4    | 2.97                     | 0.52              |
| 1:A:45:A:C2     | 1:A:388:G:H2'   | 2.44                     | 0.52              |
| 1:A:53:C:H2'    | 1:A:54:C:C6     | 2.44                     | 0.52              |
| 1:A:268:G:H2'   | 1:A:269:G:C8    | 2.45                     | 0.52              |
| 1:A:163:C:H6    | 1:A:163:C:O5'   | 1.92                     | 0.52              |
| 1:A:217:A:H2'   | 1:A:218:A:H8    | 1.73                     | 0.52              |
| 1:A:101:U:H4'   | 1:A:102:C:OP1   | 2.09                     | 0.52              |
| 1:A:356:A:H3'   | 1:A:357:G:H8    | 1.74                     | 0.52              |
| 2:B:56:VAL:HA   | 2:B:59:ARG:HH12 | 1.75                     | 0.52              |
| 1:A:360:G:O2'   | 1:A:364:A:N6    | 2.42                     | 0.52              |
| 1:A:407:U:H2'   | 1:A:408:G:O4'   | 2.10                     | 0.52              |

Continued on next page...

*Continued from previous page...*

| Atom-1          | Atom-2           | Interatomic distance (Å) | Clash overlap (Å) |
|-----------------|------------------|--------------------------|-------------------|
| 1:A:196:C:H2'   | 1:A:197:A:C8     | 2.45                     | 0.51              |
| 1:A:269:G:H3'   | 1:A:270:U:H6     | 1.74                     | 0.51              |
| 1:A:135:U:O2'   | 1:A:136:G:H5'    | 2.10                     | 0.51              |
| 2:B:112:LYS:HG3 | 2:B:114:GLU:HG2  | 1.92                     | 0.51              |
| 1:A:203:G:C5    | 1:A:205:A:H1'    | 2.44                     | 0.51              |
| 2:B:79:LYS:HD2  | 2:B:81:TYR:HE1   | 1.74                     | 0.51              |
| 2:B:7:ILE:HA    | 2:B:42:ARG:HH21  | 1.75                     | 0.51              |
| 1:A:162:G:C3'   | 1:A:163:C:C5     | 2.90                     | 0.51              |
| 1:A:380:A:C2    | 1:A:381:A:C4     | 2.99                     | 0.51              |
| 1:A:144:G:C6    | 1:A:145:G:C4     | 2.99                     | 0.51              |
| 1:A:339:A:H2'   | 1:A:340:U:C6     | 2.45                     | 0.51              |
| 1:A:154:U:O2'   | 1:A:155:A:H5'    | 2.11                     | 0.50              |
| 1:A:164:U:C4    | 1:A:165:G:N7     | 2.79                     | 0.50              |
| 1:A:206:G:N1    | 1:A:232:A:O2'    | 2.44                     | 0.50              |
| 1:A:229:G:N3    | 1:A:230:G:N2     | 2.60                     | 0.50              |
| 1:A:76:G:H2'    | 1:A:77:C:O4'     | 2.11                     | 0.50              |
| 1:A:188:A:O2'   | 1:A:244:C:O2'    | 2.22                     | 0.50              |
| 2:B:17:PHE:HE1  | 2:B:82:VAL:HG11  | 1.75                     | 0.50              |
| 1:A:87:U:H2'    | 1:A:88:C:C6      | 2.47                     | 0.50              |
| 1:A:198:G:O3'   | 1:A:227:G:N2     | 2.44                     | 0.50              |
| 1:A:201:A:C2    | 1:A:232:A:C4     | 2.99                     | 0.50              |
| 1:A:409:A:H3'   | 1:A:410:U:H6     | 1.76                     | 0.50              |
| 1:A:361:C:O2'   | 1:A:362:A:H3'    | 2.12                     | 0.50              |
| 1:A:155:A:H1'   | 1:A:217:A:N3     | 2.26                     | 0.50              |
| 1:A:166:G:H3'   | 1:A:167:G:C8     | 2.47                     | 0.50              |
| 1:A:261:A:H2'   | 1:A:262:A:C8     | 2.46                     | 0.50              |
| 1:A:296:A:H2'   | 1:A:297:C:O4'    | 2.11                     | 0.50              |
| 2:B:99:LYS:O    | 2:B:102:ILE:HG13 | 2.12                     | 0.50              |
| 1:A:289:G:O2'   | 1:A:296:A:N6     | 2.45                     | 0.50              |
| 1:A:142:G:C6    | 1:A:189:A:C2     | 2.99                     | 0.50              |
| 1:A:196:C:H2'   | 1:A:197:A:O4'    | 2.12                     | 0.50              |
| 1:A:8:A:H3'     | 1:A:9:U:H6       | 1.77                     | 0.49              |
| 1:A:143:G:C6    | 1:A:144:G:N7     | 2.81                     | 0.49              |
| 1:A:269:G:H3'   | 1:A:270:U:C6     | 2.47                     | 0.49              |
| 1:A:341:U:H5''  | 1:A:341:U:H6     | 1.77                     | 0.49              |
| 1:A:66:G:H2'    | 1:A:67:U:C2      | 2.47                     | 0.49              |
| 1:A:322:C:H2'   | 1:A:323:A:C8     | 2.47                     | 0.49              |
| 1:A:96:G:H3'    | 1:A:97:C:C6      | 2.48                     | 0.49              |
| 1:A:176:C:H2'   | 1:A:177:G:O4'    | 2.12                     | 0.49              |
| 1:A:201:A:N6    | 1:A:230:G:H1     | 2.11                     | 0.49              |
| 1:A:218:A:C4    | 1:A:219:C:H1'    | 2.48                     | 0.49              |

*Continued on next page...*

Continued from previous page...

| Atom-1         | Atom-2           | Interatomic distance (Å) | Clash overlap (Å) |
|----------------|------------------|--------------------------|-------------------|
| 1:A:124:U:H2'  | 1:A:125:U:O4'    | 2.12                     | 0.49              |
| 1:A:410:U:H2'  | 1:A:411:U:C6     | 2.47                     | 0.49              |
| 1:A:414:C:H2'  | 1:A:415:G:C8     | 2.47                     | 0.49              |
| 1:A:54:C:C2    | 1:A:395:G:C2     | 3.01                     | 0.49              |
| 1:A:162:G:C3'  | 1:A:163:C:H5     | 2.22                     | 0.49              |
| 1:A:371:U:H4'  | 1:A:373:C:H5     | 1.77                     | 0.49              |
| 1:A:407:U:H2'  | 1:A:408:G:C8     | 2.47                     | 0.49              |
| 2:B:44:GLY:HA3 | 2:B:82:VAL:HG22  | 1.95                     | 0.49              |
| 1:A:85:G:H2'   | 1:A:87:U:C4      | 2.47                     | 0.49              |
| 1:A:175:U:H2'  | 1:A:176:C:C6     | 2.48                     | 0.48              |
| 1:A:177:G:C8   | 1:A:178:A:H2'    | 2.47                     | 0.48              |
| 2:B:74:GLU:HB3 | 2:B:111:LEU:HD11 | 1.94                     | 0.48              |
| 1:A:209:C:C2   | 1:A:225:A:C2     | 3.01                     | 0.48              |
| 1:A:363:A:H5'' | 1:A:363:A:H8     | 1.74                     | 0.48              |
| 1:A:381:A:C2   | 1:A:382:G:HI'    | 2.48                     | 0.48              |
| 1:A:162:G:C1'  | 1:A:164:U:H5     | 2.26                     | 0.48              |
| 1:A:166:G:H2'  | 1:A:167:G:C8     | 2.48                     | 0.48              |
| 1:A:236:G:H8   | 1:A:236:G:H5''   | 1.78                     | 0.48              |
| 1:A:155:A:N3   | 1:A:216:A:C2     | 2.82                     | 0.48              |
| 1:A:186:G:H5'' | 1:A:186:G:C8     | 2.46                     | 0.48              |
| 2:B:24:ALA:HB2 | 2:B:29:VAL:HG22  | 1.96                     | 0.48              |
| 1:A:17:U:H2'   | 1:A:18:A:C8      | 2.48                     | 0.48              |
| 1:A:211:A:C6   | 1:A:223:A:C6     | 3.02                     | 0.48              |
| 1:A:201:A:C4   | 1:A:231:A:H2     | 2.31                     | 0.47              |
| 1:A:164:U:H2'  | 1:A:165:G:C8     | 2.49                     | 0.47              |
| 1:A:183:C:H2'  | 1:A:184:C:C6     | 2.49                     | 0.47              |
| 1:A:54:C:HI'   | 1:A:395:G:N2     | 2.29                     | 0.47              |
| 1:A:142:G:C4   | 1:A:189:A:C2     | 3.02                     | 0.47              |
| 1:A:221:U:H2'  | 1:A:222:U:H6     | 1.75                     | 0.47              |
| 2:B:7:ILE:HG23 | 2:B:42:ARG:NH2   | 2.30                     | 0.47              |
| 1:A:153:C:H2'  | 1:A:154:U:C6     | 2.49                     | 0.47              |
| 2:B:4:LYS:C    | 2:B:6:ARG:H      | 2.22                     | 0.47              |
| 1:A:195:A:H2'  | 1:A:195:A:N3     | 2.29                     | 0.47              |
| 1:A:201:A:N6   | 1:A:230:G:H22    | 2.12                     | 0.47              |
| 1:A:45:A:C8    | 1:A:45:A:H5'     | 2.50                     | 0.47              |
| 1:A:195:A:H3'  | 1:A:196:C:H6     | 1.80                     | 0.47              |
| 1:A:228:U:H2'  | 1:A:229:G:C4     | 2.50                     | 0.47              |
| 1:A:294:G:H2'  | 1:A:295:A:C8     | 2.49                     | 0.47              |
| 1:A:380:A:O2'  | 1:A:381:A:H5'    | 2.15                     | 0.47              |
| 1:A:199:U:C4   | 1:A:200:G:C5     | 3.02                     | 0.47              |
| 1:A:341:U:C4   | 1:A:342:A:N7     | 2.83                     | 0.47              |

Continued on next page...

Continued from previous page...

| Atom-1        | Atom-2         | Interatomic distance (Å) | Clash overlap (Å) |
|---------------|----------------|--------------------------|-------------------|
| 1:A:348:G:H2' | 1:A:381:A:N6   | 2.29                     | 0.47              |
| 1:A:53:C:H2'  | 1:A:54:C:H6    | 1.79                     | 0.47              |
| 1:A:185:U:H2' | 1:A:186:G:C8   | 2.50                     | 0.46              |
| 1:A:17:U:H3   | 1:A:342:A:N6   | 2.10                     | 0.46              |
| 1:A:241:A:H2' | 1:A:242:C:H6   | 1.79                     | 0.46              |
| 1:A:186:G:N2  | 1:A:188:A:H3'  | 2.31                     | 0.46              |
| 1:A:208:U:H2' | 1:A:209:C:H6   | 1.81                     | 0.46              |
| 1:A:218:A:C5  | 1:A:219:C:H1'  | 2.50                     | 0.46              |
| 1:A:347:C:C2  | 1:A:383:G:C2   | 3.04                     | 0.46              |
| 1:A:385:A:H8  | 1:A:400:U:O2'  | 1.97                     | 0.46              |
| 2:B:1:MET:HB3 | 2:B:1:MET:HE3  | 1.54                     | 0.46              |
| 1:A:8:A:C4    | 1:A:408:G:N2   | 2.84                     | 0.46              |
| 1:A:24:U:H5'' | 2:B:3:LYS:HE2  | 1.98                     | 0.46              |
| 1:A:408:G:C6  | 1:A:409:A:C5   | 3.04                     | 0.46              |
| 1:A:144:G:C6  | 1:A:145:G:C5   | 3.04                     | 0.46              |
| 1:A:144:G:C2  | 1:A:145:G:H1'  | 2.51                     | 0.46              |
| 1:A:232:A:H4' | 1:A:233:C:H6   | 1.81                     | 0.46              |
| 1:A:350:A:H2' | 1:A:351:G:C8   | 2.51                     | 0.46              |
| 1:A:210:U:H3' | 1:A:211:A:H8   | 1.80                     | 0.46              |
| 1:A:234:G:O2' | 1:A:235:C:O5'  | 2.27                     | 0.46              |
| 1:A:152:C:H2' | 1:A:153:C:C6   | 2.51                     | 0.46              |
| 1:A:226:G:H4' | 1:A:226:G:OP1  | 2.16                     | 0.46              |
| 1:A:349:G:C8  | 1:A:380:A:N6   | 2.84                     | 0.46              |
| 1:A:200:G:N1  | 1:A:232:A:C4   | 2.85                     | 0.45              |
| 1:A:155:A:H2' | 1:A:156:C:O4'  | 2.16                     | 0.45              |
| 1:A:215:G:O2' | 1:A:218:A:N6   | 2.49                     | 0.45              |
| 1:A:166:G:C3' | 1:A:167:G:C8   | 2.99                     | 0.45              |
| 1:A:213:G:C2  | 1:A:221:U:C2   | 3.04                     | 0.45              |
| 1:A:8:A:H3'   | 1:A:9:U:C6     | 2.52                     | 0.45              |
| 1:A:23:C:O2   | 1:A:336:A:O2'  | 2.33                     | 0.45              |
| 1:A:84:U:O3'  | 1:A:86:U:O4    | 2.35                     | 0.45              |
| 1:A:198:G:H2' | 1:A:200:G:N7   | 2.32                     | 0.45              |
| 1:A:284:C:H2' | 1:A:285:G:O4'  | 2.17                     | 0.45              |
| 1:A:8:A:C2    | 1:A:408:G:C2   | 3.05                     | 0.45              |
| 1:A:162:G:O2' | 1:A:163:C:C6   | 2.70                     | 0.45              |
| 1:A:336:A:H2' | 1:A:337:U:C6   | 2.51                     | 0.45              |
| 1:A:198:G:N2  | 1:A:201:A:OP2  | 2.47                     | 0.45              |
| 1:A:42:U:H2'  | 1:A:43:A:C8    | 2.52                     | 0.45              |
| 2:B:56:VAL:HA | 2:B:59:ARG:NH1 | 2.32                     | 0.45              |
| 1:A:143:G:N2  | 1:A:184:C:H1'  | 2.32                     | 0.45              |
| 1:A:47:G:H1   | 1:A:385:A:N6   | 2.07                     | 0.44              |

Continued on next page...

Continued from previous page...

| Atom-1           | Atom-2         | Interatomic distance (Å) | Clash overlap (Å) |
|------------------|----------------|--------------------------|-------------------|
| 1:A:74:A:H8      | 1:A:74:A:H5''  | 1.81                     | 0.44              |
| 1:A:360:G:H3'    | 1:A:361:C:H6   | 1.82                     | 0.44              |
| 1:A:397:U:H2'    | 1:A:398:U:O4'  | 2.16                     | 0.44              |
| 2:B:105:LEU:HD23 | 2:B:105:LEU:HA | 1.85                     | 0.44              |
| 2:B:4:LYS:HE2    | 2:B:4:LYS:HB2  | 1.75                     | 0.44              |
| 1:A:159:C:H2'    | 1:A:160:C:C6   | 2.52                     | 0.44              |
| 1:A:187:A:H2'    | 1:A:188:A:C8   | 2.52                     | 0.44              |
| 1:A:206:G:C2     | 1:A:207:C:N4   | 2.85                     | 0.44              |
| 1:A:406:A:C6     | 1:A:407:U:C4   | 3.06                     | 0.44              |
| 1:A:87:U:H2'     | 1:A:88:C:H6    | 1.82                     | 0.44              |
| 1:A:200:G:N2     | 1:A:206:G:C2   | 2.85                     | 0.44              |
| 1:A:17:U:H2'     | 1:A:18:A:H8    | 1.82                     | 0.44              |
| 1:A:189:A:H3'    | 1:A:190:G:H5'  | 2.00                     | 0.44              |
| 1:A:207:C:H2'    | 1:A:208:U:H6   | 1.82                     | 0.44              |
| 2:B:37:GLU:CD    | 2:B:37:GLU:H   | 2.26                     | 0.44              |
| 1:A:138:C:OP1    | 1:A:138:C:H4'  | 2.14                     | 0.44              |
| 1:A:197:A:H3'    | 1:A:198:G:H8   | 1.83                     | 0.44              |
| 1:A:242:C:H2'    | 1:A:243:C:O4'  | 2.18                     | 0.44              |
| 1:A:98:G:C2'     | 1:A:107:A:H61  | 2.31                     | 0.43              |
| 1:A:207:C:C2'    | 1:A:208:U:H5'  | 2.48                     | 0.43              |
| 2:B:72:LYS:HE3   | 2:B:72:LYS:HB3 | 1.67                     | 0.43              |
| 1:A:197:A:C6     | 1:A:198:G:C4   | 3.06                     | 0.43              |
| 1:A:197:A:C2     | 1:A:198:G:H1'  | 2.53                     | 0.43              |
| 1:A:210:U:C3'    | 1:A:211:A:H8   | 2.31                     | 0.43              |
| 1:A:227:G:N3     | 1:A:227:G:H2'  | 2.33                     | 0.43              |
| 2:B:2:LYS:HB3    | 2:B:2:LYS:HE2  | 1.55                     | 0.43              |
| 1:A:166:G:H3'    | 1:A:167:G:H8   | 1.80                     | 0.43              |
| 1:A:216:A:C2     | 1:A:217:A:C4   | 3.06                     | 0.43              |
| 1:A:219:C:O5'    | 1:A:219:C:H6   | 2.01                     | 0.43              |
| 1:A:376:U:H2'    | 1:A:377:A:C8   | 2.54                     | 0.43              |
| 1:A:1:G:N2       | 1:A:415:G:H1'  | 2.33                     | 0.43              |
| 1:A:187:A:O5'    | 1:A:187:A:H8   | 2.01                     | 0.43              |
| 1:A:210:U:H3     | 1:A:223:A:N6   | 2.14                     | 0.43              |
| 1:A:281:U:H2'    | 1:A:282:C:H6   | 1.83                     | 0.43              |
| 1:A:348:G:H21    | 1:A:381:A:H62  | 1.64                     | 0.43              |
| 1:A:190:G:C2     | 1:A:191:U:C2   | 3.07                     | 0.43              |
| 1:A:207:C:H2'    | 1:A:208:U:C6   | 2.54                     | 0.43              |
| 1:A:343:C:H2'    | 1:A:344:C:O4'  | 2.19                     | 0.43              |
| 1:A:356:A:H3'    | 1:A:357:G:C8   | 2.53                     | 0.43              |
| 1:A:382:G:C2     | 1:A:383:G:H1'  | 2.53                     | 0.43              |
| 1:A:11:C:H2'     | 1:A:12:U:H6    | 1.83                     | 0.43              |

Continued on next page...

Continued from previous page...

| Atom-1         | Atom-2          | Interatomic distance (Å) | Clash overlap (Å) |
|----------------|-----------------|--------------------------|-------------------|
| 1:A:135:U:H2'  | 1:A:136:G:O4'   | 2.19                     | 0.43              |
| 1:A:353:A:H3'  | 1:A:354:C:C6    | 2.54                     | 0.43              |
| 1:A:326:C:H2'  | 1:A:327:U:C6    | 2.53                     | 0.43              |
| 2:B:27:GLN:HB3 | 2:B:88:PRO:HG2  | 2.00                     | 0.43              |
| 1:A:207:C:O2'  | 1:A:208:U:H5'   | 2.19                     | 0.42              |
| 1:A:144:G:C5   | 1:A:145:G:C8    | 3.06                     | 0.42              |
| 1:A:225:A:H2'  | 1:A:225:A:N3    | 2.34                     | 0.42              |
| 1:A:403:A:H2'  | 1:A:404:G:O4'   | 2.19                     | 0.42              |
| 1:A:85:G:H4'   | 1:A:86:U:C5     | 2.54                     | 0.42              |
| 1:A:95:A:H2'   | 1:A:96:G:O4'    | 2.18                     | 0.42              |
| 1:A:189:A:O2'  | 1:A:190:G:OP1   | 2.31                     | 0.42              |
| 1:A:236:G:H2'  | 1:A:237:G:H8    | 1.84                     | 0.42              |
| 1:A:405:C:C2   | 1:A:406:A:C8    | 3.07                     | 0.42              |
| 1:A:300:A:H2'  | 1:A:301:G:H5'   | 2.02                     | 0.42              |
| 1:A:393:U:H2'  | 1:A:394:G:H8    | 1.80                     | 0.42              |
| 1:A:36:C:H6    | 1:A:36:C:P      | 2.42                     | 0.42              |
| 1:A:197:A:C2'  | 1:A:198:G:H5'   | 2.50                     | 0.42              |
| 1:A:232:A:H4'  | 1:A:233:C:C6    | 2.54                     | 0.42              |
| 2:B:27:GLN:HA  | 2:B:86:ARG:HB2  | 2.02                     | 0.42              |
| 1:A:318:C:H2'  | 1:A:319:A:N3    | 2.35                     | 0.42              |
| 1:A:198:G:H4'  | 1:A:228:U:C5'   | 2.50                     | 0.42              |
| 1:A:50:A:H5'   | 1:A:388:G:H5''  | 2.01                     | 0.41              |
| 1:A:200:G:C6   | 1:A:232:A:C4    | 3.08                     | 0.41              |
| 2:B:67:CYS:SG  | 2:B:98:LYS:HA   | 2.60                     | 0.41              |
| 1:A:33:U:H4'   | 1:A:34:U:O4'    | 2.20                     | 0.41              |
| 1:A:156:C:H42  | 1:A:170:A:H61   | 1.67                     | 0.41              |
| 1:A:194:C:N4   | 1:A:202:C:OP2   | 2.53                     | 0.41              |
| 1:A:198:G:C4   | 1:A:200:G:OP2   | 2.74                     | 0.41              |
| 1:A:123:C:H2'  | 1:A:124:U:O4'   | 2.20                     | 0.41              |
| 1:A:137:A:O2'  | 1:A:138:C:P     | 2.79                     | 0.41              |
| 1:A:141:C:H3'  | 1:A:142:G:C5'   | 2.47                     | 0.41              |
| 1:A:283:C:H2'  | 1:A:284:C:C6    | 2.55                     | 0.41              |
| 1:A:373:C:H2'  | 1:A:374:A:C8    | 2.55                     | 0.41              |
| 1:A:142:G:C6   | 1:A:189:A:H2    | 2.38                     | 0.41              |
| 1:A:263:A:H4'  | 1:A:264:U:OP1   | 2.20                     | 0.41              |
| 1:A:63:A:N6    | 1:A:80:G:O6     | 2.54                     | 0.41              |
| 1:A:407:U:C2   | 1:A:408:G:C8    | 3.09                     | 0.41              |
| 1:A:10:G:H2'   | 1:A:11:C:C6     | 2.56                     | 0.41              |
| 1:A:216:A:H2'  | 1:A:217:A:C8    | 2.56                     | 0.41              |
| 1:A:323:A:H2'  | 1:A:324:G:O4'   | 2.20                     | 0.41              |
| 2:B:112:LYS:HA | 2:B:112:LYS:HD3 | 1.86                     | 0.41              |

Continued on next page...

Continued from previous page...

| Atom-1        | Atom-2        | Interatomic distance (Å) | Clash overlap (Å) |
|---------------|---------------|--------------------------|-------------------|
| 1:A:121:G:H1  | 1:A:130:U:H3  | 1.68                     | 0.41              |
| 1:A:122:G:C2  | 1:A:123:C:H1' | 2.55                     | 0.41              |
| 1:A:201:A:N6  | 1:A:229:G:H1' | 2.36                     | 0.41              |
| 1:A:380:A:N1  | 1:A:381:A:C6  | 2.88                     | 0.41              |
| 1:A:6:U:H2'   | 1:A:7:C:O4'   | 2.21                     | 0.41              |
| 1:A:220:C:H2' | 1:A:221:U:H6  | 1.86                     | 0.41              |
| 1:A:376:U:H2' | 1:A:377:A:H8  | 1.85                     | 0.41              |
| 1:A:401:A:H2' | 1:A:402:G:O4' | 2.21                     | 0.41              |
| 1:A:155:A:O2' | 1:A:217:A:H1' | 2.20                     | 0.40              |
| 1:A:8:A:C5    | 1:A:9:U:C5    | 3.09                     | 0.40              |
| 1:A:23:C:H2'  | 1:A:24:U:C6   | 2.57                     | 0.40              |
| 1:A:196:C:C4  | 1:A:197:A:C5  | 3.09                     | 0.40              |
| 1:A:211:A:C2  | 1:A:223:A:C4  | 3.09                     | 0.40              |
| 1:A:230:G:H2' | 1:A:230:G:N3  | 2.36                     | 0.40              |
| 1:A:132:G:H3' | 1:A:133:G:H8  | 1.87                     | 0.40              |
| 1:A:354:C:H2' | 1:A:355:G:C8  | 2.57                     | 0.40              |
| 1:A:354:C:H2' | 1:A:355:G:O4' | 2.22                     | 0.40              |
| 1:A:364:A:C4  | 1:A:365:G:H1' | 2.57                     | 0.40              |
| 1:A:369:C:H2' | 1:A:370:U:O4' | 2.22                     | 0.40              |

There are no symmetry-related clashes.

### 5.3 Torsion angles [i](#)

#### 5.3.1 Protein backbone [i](#)

In the following table, the Percentiles column shows the percent Ramachandran outliers of the chain as a percentile score with respect to all PDB entries followed by that with respect to all EM entries.

The Analysed column shows the number of residues for which the backbone conformation was analysed, and the total number of residues.

| Mol | Chain | Analysed      | Favoured  | Allowed | Outliers | Percentiles                             |
|-----|-------|---------------|-----------|---------|----------|-----------------------------------------|
| 2   | B     | 114/116 (98%) | 106 (93%) | 8 (7%)  | 0        | <a href="#">100</a> <a href="#">100</a> |

There are no Ramachandran outliers to report.

### 5.3.2 Protein sidechains [i](#)

In the following table, the Percentiles column shows the percent sidechain outliers of the chain as a percentile score with respect to all PDB entries followed by that with respect to all EM entries.

The Analysed column shows the number of residues for which the sidechain conformation was analysed, and the total number of residues.

| Mol | Chain | Analysed     | Rotameric | Outliers | Percentiles |
|-----|-------|--------------|-----------|----------|-------------|
| 2   | B     | 99/99 (100%) | 92 (93%)  | 7 (7%)   | 12 33       |

All (7) residues with a non-rotameric sidechain are listed below:

| Mol | Chain | Res | Type |
|-----|-------|-----|------|
| 2   | B     | 1   | MET  |
| 2   | B     | 2   | LYS  |
| 2   | B     | 4   | LYS  |
| 2   | B     | 9   | LYS  |
| 2   | B     | 11  | GLU  |
| 2   | B     | 27  | GLN  |
| 2   | B     | 72  | LYS  |

Sometimes sidechains can be flipped to improve hydrogen bonding and reduce clashes. All (3) such sidechains are listed below:

| Mol | Chain | Res | Type |
|-----|-------|-----|------|
| 2   | B     | 14  | GLN  |
| 2   | B     | 27  | GLN  |
| 2   | B     | 38  | GLN  |

### 5.3.3 RNA [i](#)

| Mol | Chain | Analysed      | Backbone Outliers | Pucker Outliers |
|-----|-------|---------------|-------------------|-----------------|
| 1   | A     | 416/417 (99%) | 209 (50%)         | 24 (5%)         |

All (209) RNA backbone outliers are listed below:

| Mol | Chain | Res | Type |
|-----|-------|-----|------|
| 1   | A     | 2   | U    |
| 1   | A     | 3   | U    |
| 1   | A     | 4   | A    |
| 1   | A     | 5   | A    |

*Continued on next page...*

*Continued from previous page...*

| Mol | Chain | Res | Type |
|-----|-------|-----|------|
| 1   | A     | 6   | U    |
| 1   | A     | 7   | C    |
| 1   | A     | 8   | A    |
| 1   | A     | 9   | U    |
| 1   | A     | 11  | C    |
| 1   | A     | 13  | C    |
| 1   | A     | 15  | G    |
| 1   | A     | 19  | A    |
| 1   | A     | 22  | G    |
| 1   | A     | 27  | G    |
| 1   | A     | 29  | C    |
| 1   | A     | 30  | C    |
| 1   | A     | 31  | G    |
| 1   | A     | 33  | U    |
| 1   | A     | 35  | U    |
| 1   | A     | 36  | C    |
| 1   | A     | 41  | G    |
| 1   | A     | 45  | A    |
| 1   | A     | 46  | G    |
| 1   | A     | 47  | G    |
| 1   | A     | 48  | A    |
| 1   | A     | 49  | A    |
| 1   | A     | 50  | A    |
| 1   | A     | 51  | G    |
| 1   | A     | 53  | C    |
| 1   | A     | 65  | G    |
| 1   | A     | 66  | G    |
| 1   | A     | 67  | U    |
| 1   | A     | 68  | G    |
| 1   | A     | 69  | C    |
| 1   | A     | 70  | U    |
| 1   | A     | 73  | G    |
| 1   | A     | 74  | A    |
| 1   | A     | 75  | U    |
| 1   | A     | 80  | G    |
| 1   | A     | 81  | U    |
| 1   | A     | 85  | G    |
| 1   | A     | 86  | U    |
| 1   | A     | 87  | U    |
| 1   | A     | 91  | G    |
| 1   | A     | 92  | C    |
| 1   | A     | 99  | A    |

*Continued on next page...*

*Continued from previous page...*

| Mol | Chain | Res | Type |
|-----|-------|-----|------|
| 1   | A     | 101 | U    |
| 1   | A     | 102 | C    |
| 1   | A     | 103 | C    |
| 1   | A     | 104 | A    |
| 1   | A     | 106 | A    |
| 1   | A     | 108 | G    |
| 1   | A     | 113 | G    |
| 1   | A     | 122 | G    |
| 1   | A     | 123 | C    |
| 1   | A     | 126 | U    |
| 1   | A     | 127 | G    |
| 1   | A     | 128 | G    |
| 1   | A     | 129 | C    |
| 1   | A     | 131 | G    |
| 1   | A     | 132 | G    |
| 1   | A     | 134 | C    |
| 1   | A     | 136 | G    |
| 1   | A     | 137 | A    |
| 1   | A     | 138 | C    |
| 1   | A     | 139 | G    |
| 1   | A     | 140 | G    |
| 1   | A     | 141 | C    |
| 1   | A     | 142 | G    |
| 1   | A     | 144 | G    |
| 1   | A     | 145 | G    |
| 1   | A     | 147 | A    |
| 1   | A     | 148 | A    |
| 1   | A     | 149 | G    |
| 1   | A     | 150 | A    |
| 1   | A     | 151 | A    |
| 1   | A     | 152 | C    |
| 1   | A     | 155 | A    |
| 1   | A     | 157 | G    |
| 1   | A     | 163 | C    |
| 1   | A     | 172 | G    |
| 1   | A     | 173 | G    |
| 1   | A     | 174 | U    |
| 1   | A     | 178 | A    |
| 1   | A     | 180 | U    |
| 1   | A     | 182 | C    |
| 1   | A     | 186 | G    |
| 1   | A     | 187 | A    |

*Continued on next page...*

*Continued from previous page...*

| Mol | Chain | Res | Type |
|-----|-------|-----|------|
| 1   | A     | 188 | A    |
| 1   | A     | 190 | G    |
| 1   | A     | 191 | U    |
| 1   | A     | 192 | G    |
| 1   | A     | 193 | C    |
| 1   | A     | 195 | A    |
| 1   | A     | 196 | C    |
| 1   | A     | 201 | A    |
| 1   | A     | 202 | C    |
| 1   | A     | 203 | G    |
| 1   | A     | 204 | G    |
| 1   | A     | 205 | A    |
| 1   | A     | 206 | G    |
| 1   | A     | 207 | C    |
| 1   | A     | 208 | U    |
| 1   | A     | 209 | C    |
| 1   | A     | 210 | U    |
| 1   | A     | 211 | A    |
| 1   | A     | 212 | A    |
| 1   | A     | 214 | G    |
| 1   | A     | 215 | G    |
| 1   | A     | 216 | A    |
| 1   | A     | 217 | A    |
| 1   | A     | 219 | C    |
| 1   | A     | 225 | A    |
| 1   | A     | 226 | G    |
| 1   | A     | 227 | G    |
| 1   | A     | 228 | U    |
| 1   | A     | 229 | G    |
| 1   | A     | 230 | G    |
| 1   | A     | 231 | A    |
| 1   | A     | 232 | A    |
| 1   | A     | 233 | C    |
| 1   | A     | 234 | G    |
| 1   | A     | 235 | C    |
| 1   | A     | 236 | G    |
| 1   | A     | 237 | G    |
| 1   | A     | 239 | A    |
| 1   | A     | 240 | A    |
| 1   | A     | 241 | A    |
| 1   | A     | 242 | C    |
| 1   | A     | 250 | G    |

*Continued on next page...*

*Continued from previous page...*

| Mol | Chain | Res | Type |
|-----|-------|-----|------|
| 1   | A     | 251 | C    |
| 1   | A     | 254 | G    |
| 1   | A     | 255 | A    |
| 1   | A     | 256 | A    |
| 1   | A     | 257 | A    |
| 1   | A     | 263 | A    |
| 1   | A     | 264 | U    |
| 1   | A     | 265 | G    |
| 1   | A     | 266 | A    |
| 1   | A     | 267 | U    |
| 1   | A     | 269 | G    |
| 1   | A     | 271 | A    |
| 1   | A     | 277 | A    |
| 1   | A     | 278 | C    |
| 1   | A     | 288 | G    |
| 1   | A     | 292 | A    |
| 1   | A     | 296 | A    |
| 1   | A     | 299 | G    |
| 1   | A     | 303 | G    |
| 1   | A     | 311 | G    |
| 1   | A     | 312 | G    |
| 1   | A     | 313 | C    |
| 1   | A     | 314 | G    |
| 1   | A     | 316 | C    |
| 1   | A     | 317 | G    |
| 1   | A     | 318 | C    |
| 1   | A     | 319 | A    |
| 1   | A     | 320 | U    |
| 1   | A     | 321 | G    |
| 1   | A     | 323 | A    |
| 1   | A     | 325 | C    |
| 1   | A     | 326 | C    |
| 1   | A     | 328 | G    |
| 1   | A     | 329 | U    |
| 1   | A     | 330 | A    |
| 1   | A     | 332 | A    |
| 1   | A     | 333 | U    |
| 1   | A     | 334 | A    |
| 1   | A     | 341 | U    |
| 1   | A     | 342 | A    |
| 1   | A     | 349 | G    |
| 1   | A     | 350 | A    |

*Continued on next page...*

Continued from previous page...

| Mol | Chain | Res | Type |
|-----|-------|-----|------|
| 1   | A     | 351 | G    |
| 1   | A     | 353 | A    |
| 1   | A     | 359 | C    |
| 1   | A     | 361 | C    |
| 1   | A     | 362 | A    |
| 1   | A     | 363 | A    |
| 1   | A     | 364 | A    |
| 1   | A     | 365 | G    |
| 1   | A     | 366 | C    |
| 1   | A     | 367 | C    |
| 1   | A     | 368 | G    |
| 1   | A     | 369 | C    |
| 1   | A     | 372 | G    |
| 1   | A     | 373 | C    |
| 1   | A     | 375 | G    |
| 1   | A     | 376 | U    |
| 1   | A     | 379 | G    |
| 1   | A     | 381 | A    |
| 1   | A     | 382 | G    |
| 1   | A     | 383 | G    |
| 1   | A     | 384 | U    |
| 1   | A     | 385 | A    |
| 1   | A     | 387 | A    |
| 1   | A     | 389 | A    |
| 1   | A     | 390 | A    |
| 1   | A     | 391 | C    |
| 1   | A     | 395 | G    |
| 1   | A     | 400 | U    |
| 1   | A     | 401 | A    |
| 1   | A     | 402 | G    |
| 1   | A     | 403 | A    |
| 1   | A     | 405 | C    |
| 1   | A     | 407 | U    |
| 1   | A     | 409 | A    |
| 1   | A     | 410 | U    |
| 1   | A     | 411 | U    |
| 1   | A     | 412 | A    |

All (24) RNA pucker outliers are listed below:

| Mol | Chain | Res | Type |
|-----|-------|-----|------|
| 1   | A     | 52  | U    |

Continued on next page...

Continued from previous page...

| Mol | Chain | Res | Type |
|-----|-------|-----|------|
| 1   | A     | 66  | G    |
| 1   | A     | 67  | U    |
| 1   | A     | 68  | G    |
| 1   | A     | 91  | G    |
| 1   | A     | 126 | U    |
| 1   | A     | 136 | G    |
| 1   | A     | 137 | A    |
| 1   | A     | 186 | G    |
| 1   | A     | 187 | A    |
| 1   | A     | 201 | A    |
| 1   | A     | 204 | G    |
| 1   | A     | 216 | A    |
| 1   | A     | 232 | A    |
| 1   | A     | 235 | C    |
| 1   | A     | 236 | G    |
| 1   | A     | 254 | G    |
| 1   | A     | 263 | A    |
| 1   | A     | 276 | C    |
| 1   | A     | 277 | A    |
| 1   | A     | 329 | U    |
| 1   | A     | 363 | A    |
| 1   | A     | 382 | G    |
| 1   | A     | 389 | A    |

#### 5.4 Non-standard residues in protein, DNA, RNA chains [i](#)

There are no non-standard protein/DNA/RNA residues in this entry.

#### 5.5 Carbohydrates [i](#)

There are no oligosaccharides in this entry.

#### 5.6 Ligand geometry [i](#)

Of 22 ligands modelled in this entry, 22 are monoatomic - leaving 0 for Mogul analysis.

There are no bond length outliers.

There are no bond angle outliers.

There are no chirality outliers.

There are no torsion outliers.

There are no ring outliers.

No monomer is involved in short contacts.

### 5.7 Other polymers [i](#)

There are no such residues in this entry.

### 5.8 Polymer linkage issues [i](#)

There are no chain breaks in this entry.

For Manuscript Review

## 6 Map visualisation [i](#)

This section contains visualisations of the EMDB entry EMD-70942. These allow visual inspection of the internal detail of the map and identification of artifacts.

Images derived from a raw map, generated by summing the deposited half-maps, are presented below the corresponding image components of the primary map to allow further visual inspection and comparison with those of the primary map.

### 6.1 Orthogonal projections [i](#)

#### 6.1.1 Primary map

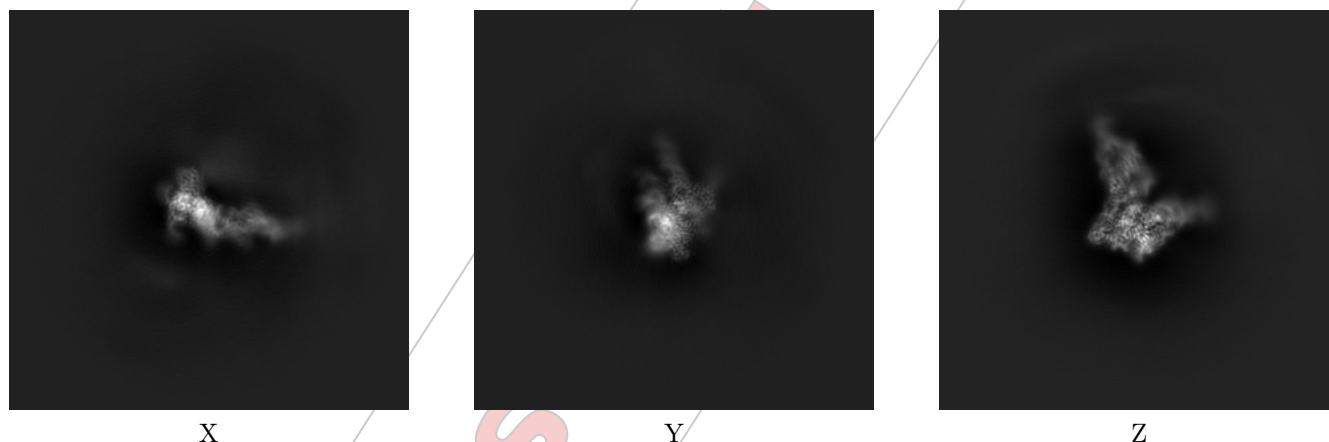

#### 6.1.2 Raw map

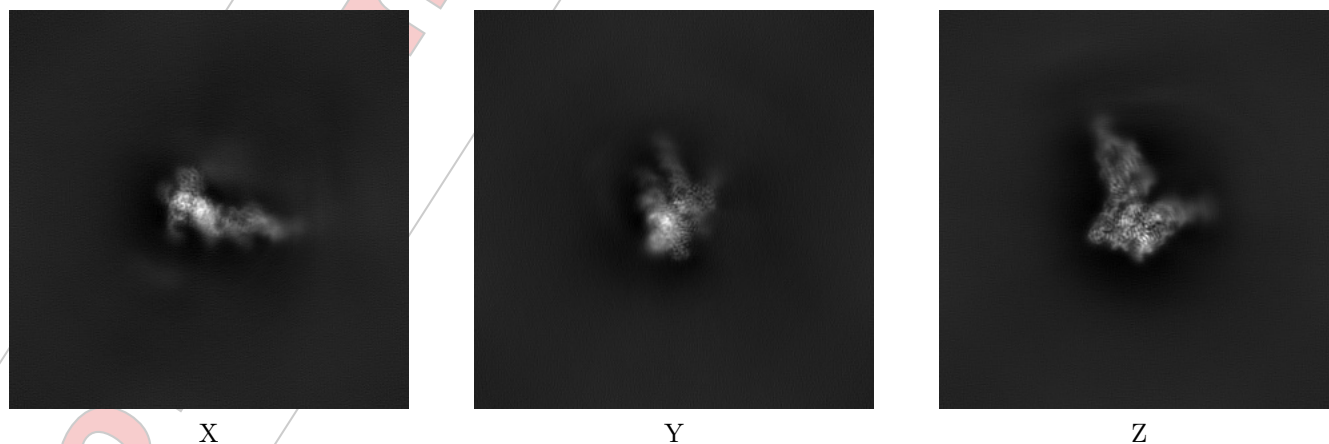

The images above show the map projected in three orthogonal directions.

## 6.2 Central slices [i](#)

### 6.2.1 Primary map

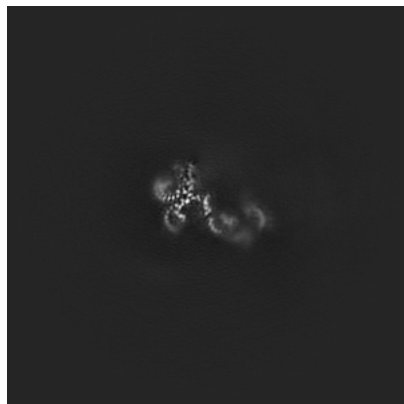

X Index: 200

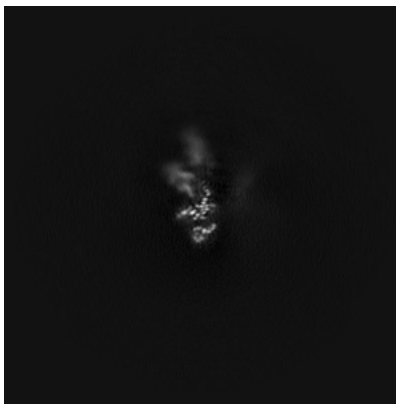

Y Index: 200

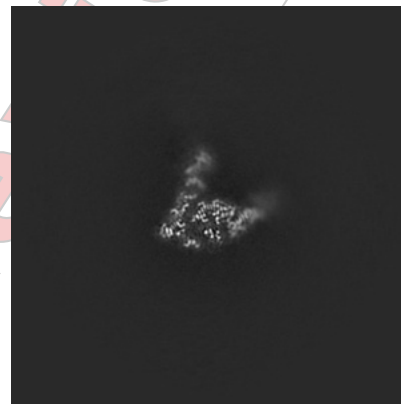

Z Index: 200

### 6.2.2 Raw map

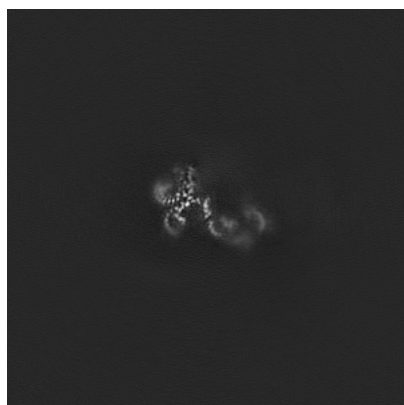

X Index: 200

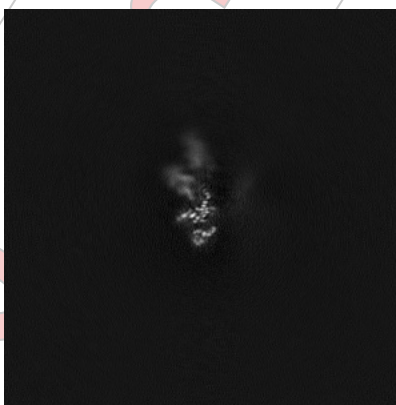

Y Index: 200

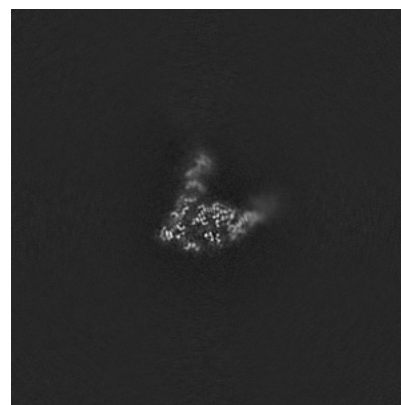

Z Index: 200

The images above show central slices of the map in three orthogonal directions.

## 6.3 Largest variance slices [i](#)

### 6.3.1 Primary map

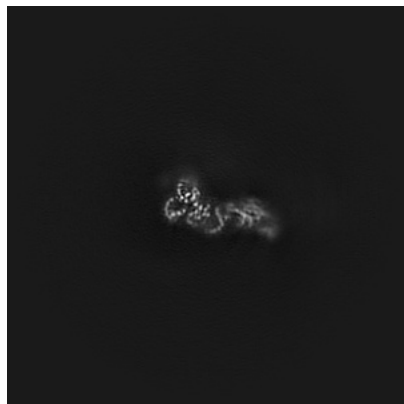

X Index: 187

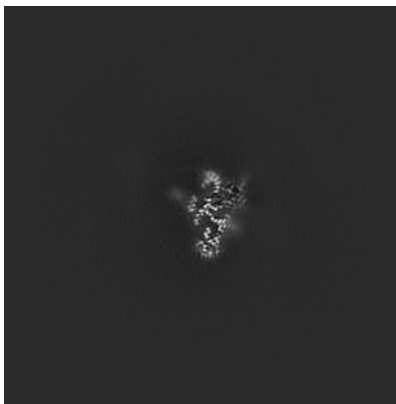

Y Index: 175

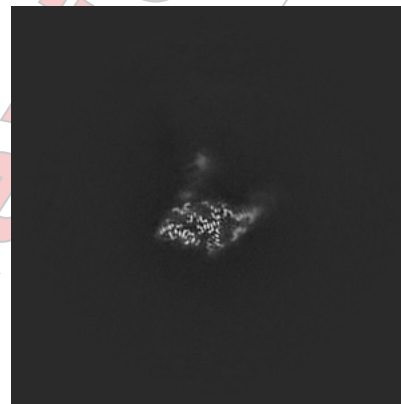

Z Index: 205

### 6.3.2 Raw map

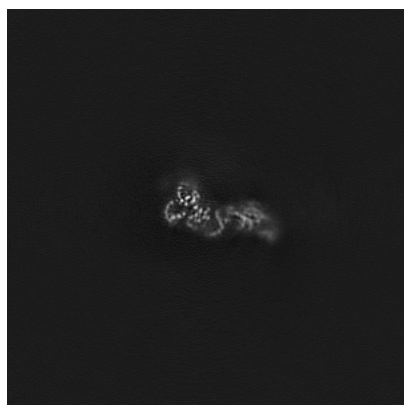

X Index: 187

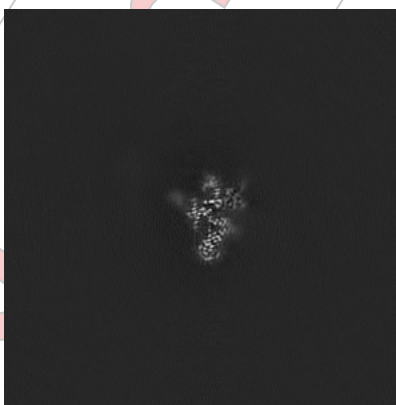

Y Index: 173

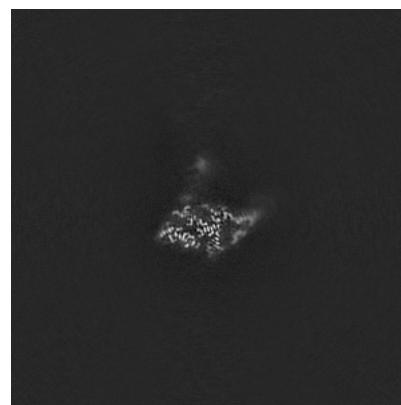

Z Index: 205

The images above show the largest variance slices of the map in three orthogonal directions.

## 6.4 Orthogonal standard-deviation projections (False-color) [i](#)

### 6.4.1 Primary map

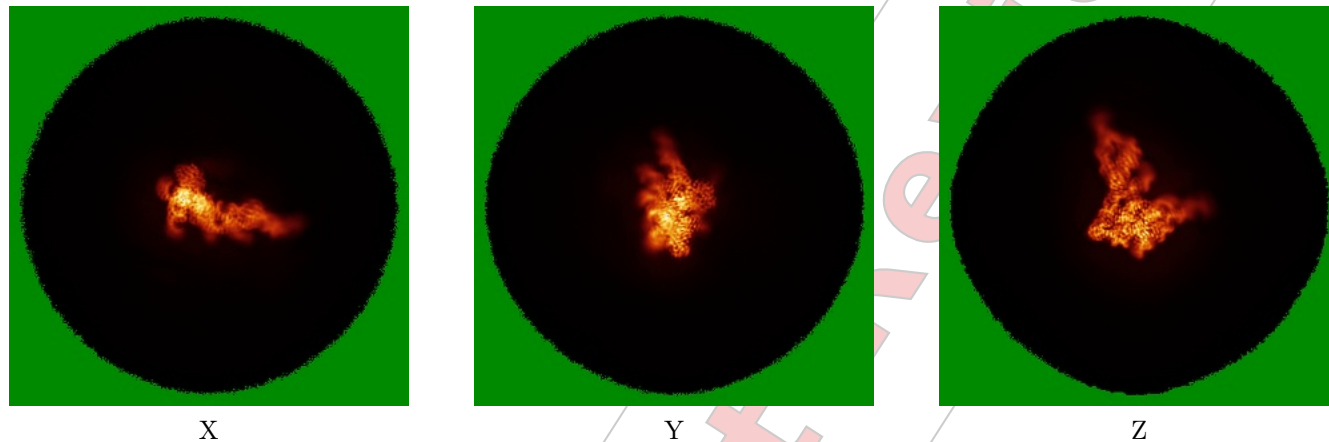

### 6.4.2 Raw map

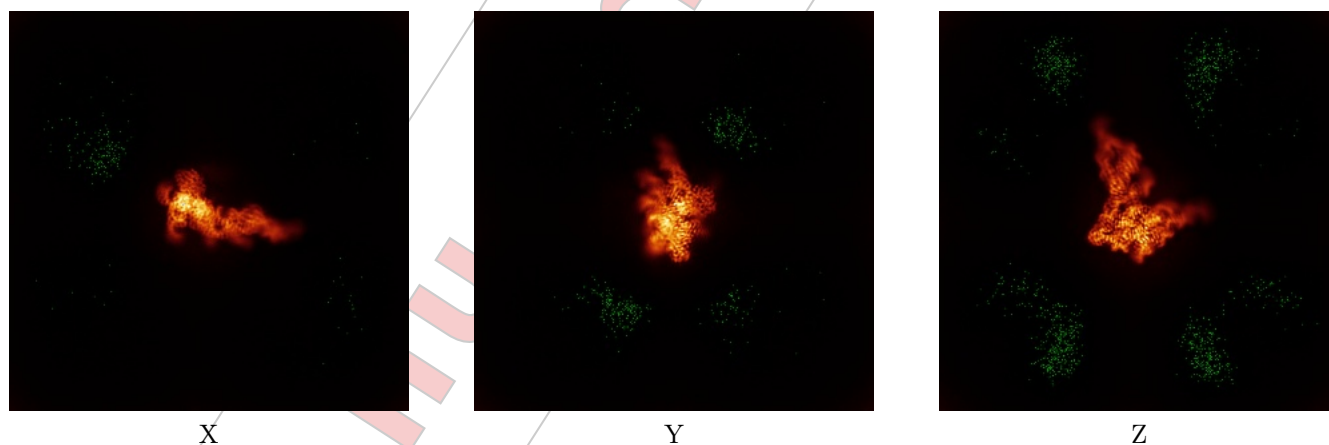

The images above show the map standard deviation projections with false color in three orthogonal directions. Minimum values are shown in green, max in blue, and dark to light orange shades represent small to large values respectively.

## 6.5 Orthogonal surface views [i](#)

### 6.5.1 Primary map

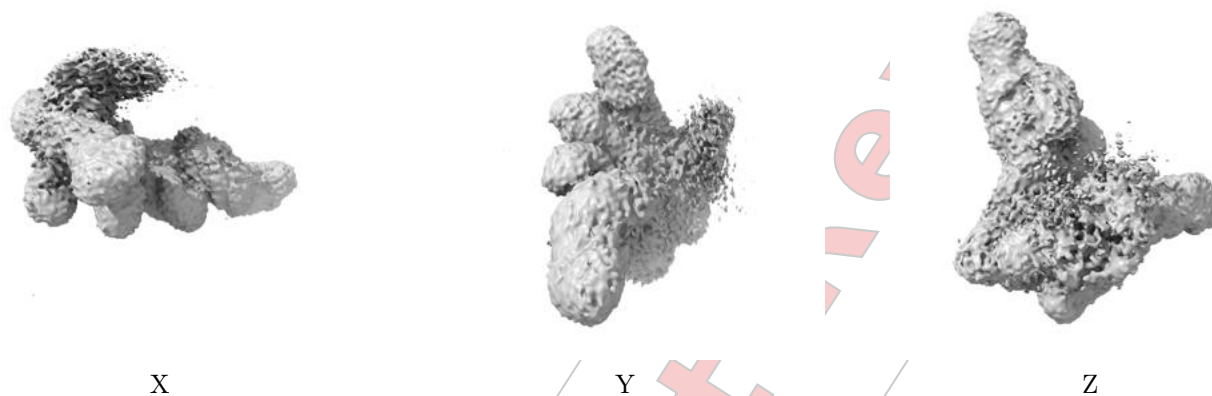

The images above show the 3D surface view of the map at the recommended contour level 0.03. These images, in conjunction with the slice images, may facilitate assessment of whether an appropriate contour level has been provided.

### 6.5.2 Raw map

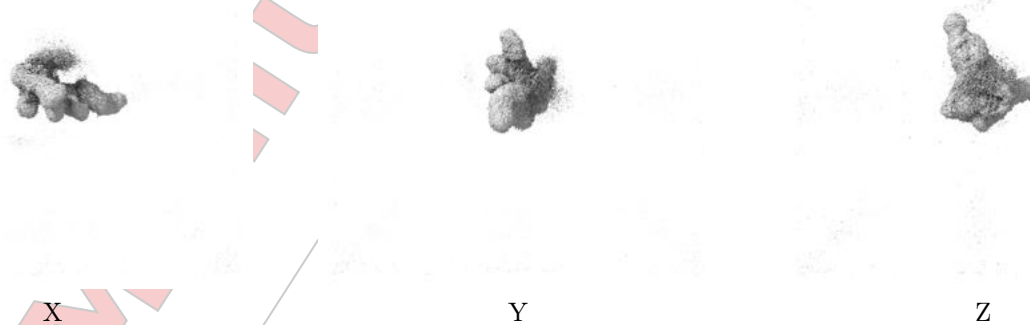

These images show the 3D surface of the raw map. The raw map's contour level was selected so that its surface encloses the same volume as the primary map does at its recommended contour level.

## 6.6 Mask visualisation [i](#)

This section was not generated. No masks/segmentation were deposited.

## 7 Map analysis [i](#)

This section contains the results of statistical analysis of the map.

### 7.1 Map-value distribution [i](#)

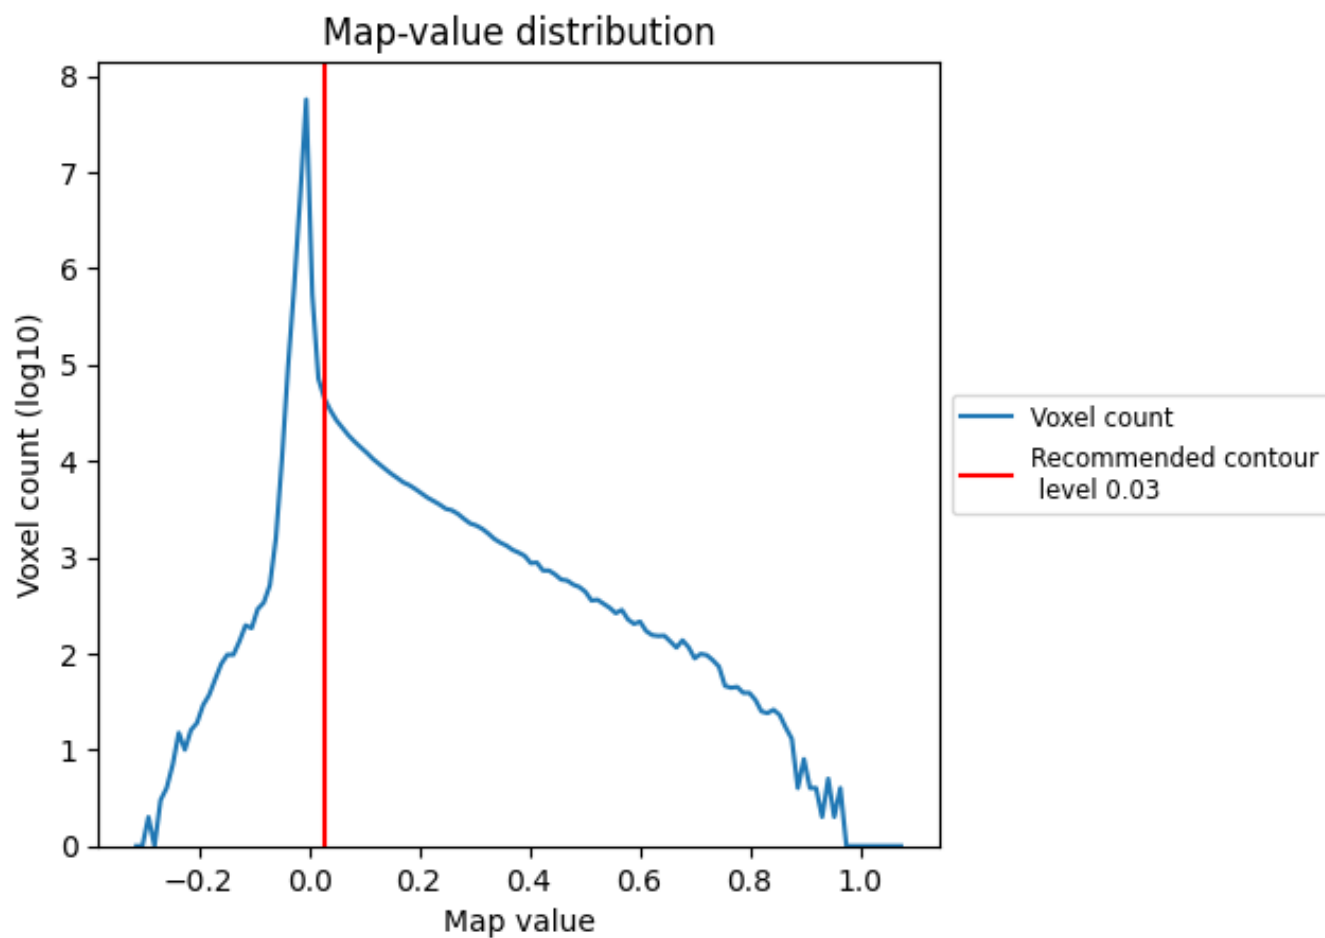

The map-value distribution is plotted in 128 intervals along the x-axis. The y-axis is logarithmic. A spike in this graph at zero usually indicates that the volume has been masked.

## 7.2 Volume estimate [i](#)

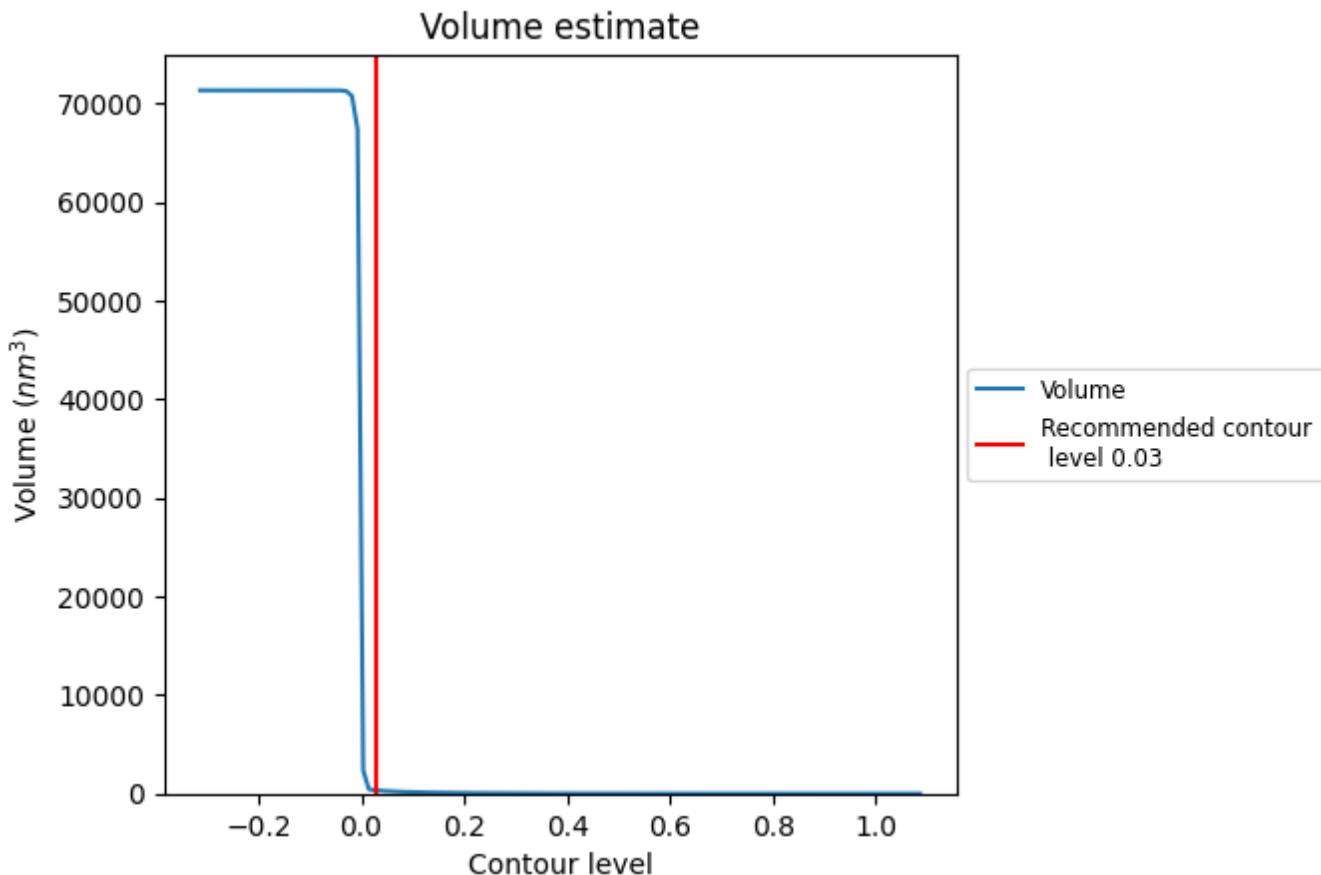

The volume at the recommended contour level is 327  $\text{nm}^3$ ; this corresponds to an approximate mass of 295 kDa.

The volume estimate graph shows how the enclosed volume varies with the contour level. The recommended contour level is shown as a vertical line and the intersection between the line and the curve gives the volume of the enclosed surface at the given level.

7.3 Rotationally averaged power spectrum 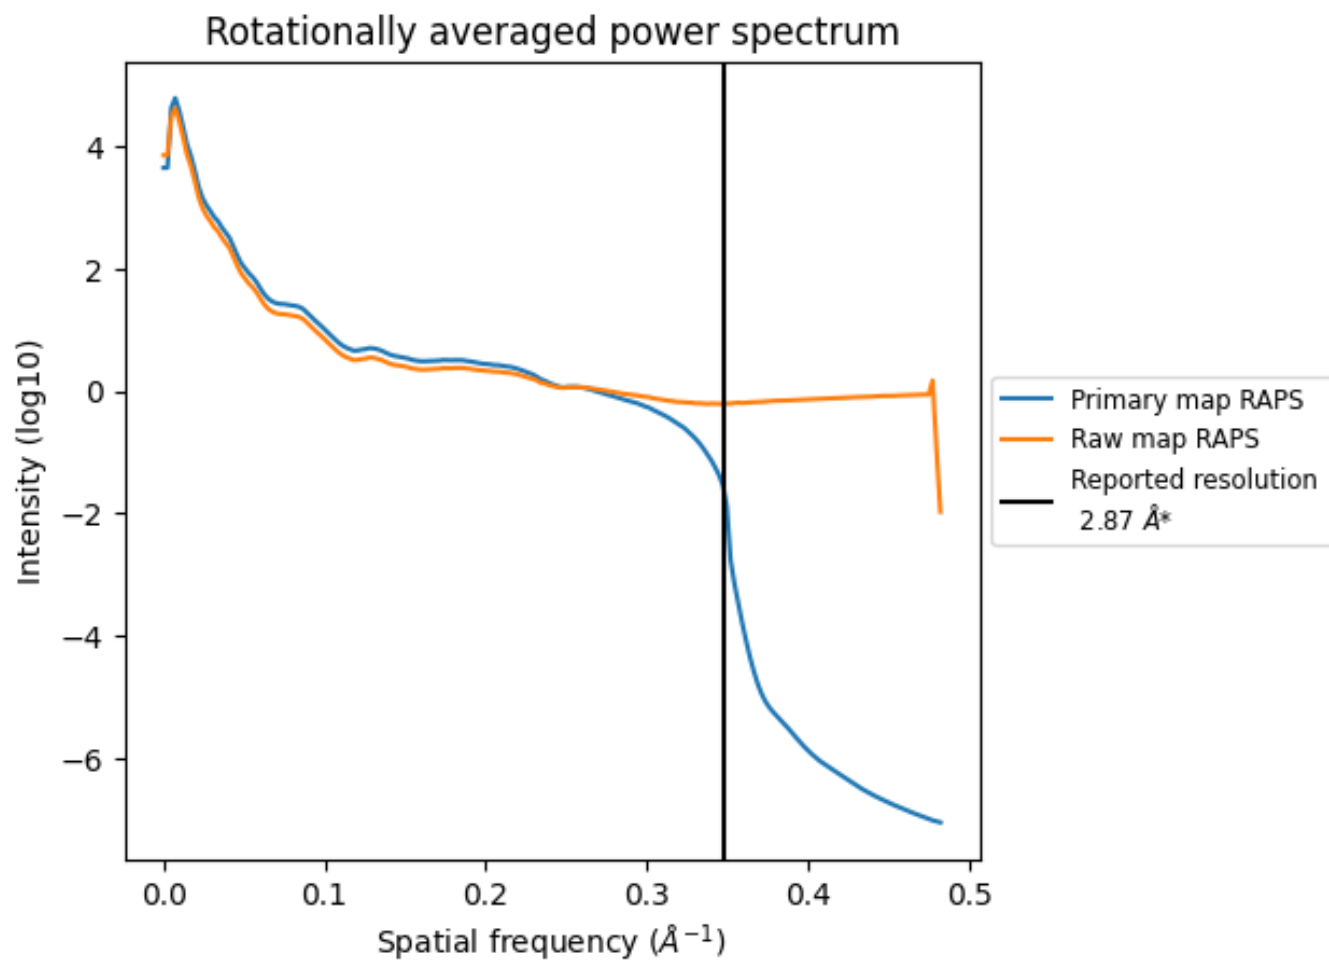

\*Reported resolution corresponds to spatial frequency of 0.348 Å<sup>-1</sup>

## 8 Fourier-Shell correlation [\(i\)](#)

Fourier-Shell Correlation (FSC) is the most commonly used method to estimate the resolution of single-particle and subtomogram-averaged maps. The shape of the curve depends on the imposed symmetry, mask and whether or not the two 3D reconstructions used were processed from a common reference. The reported resolution is shown as a black line. A curve is displayed for the half-bit criterion in addition to lines showing the 0.143 gold standard cut-off and 0.5 cut-off.

### 8.1 FSC [\(i\)](#)

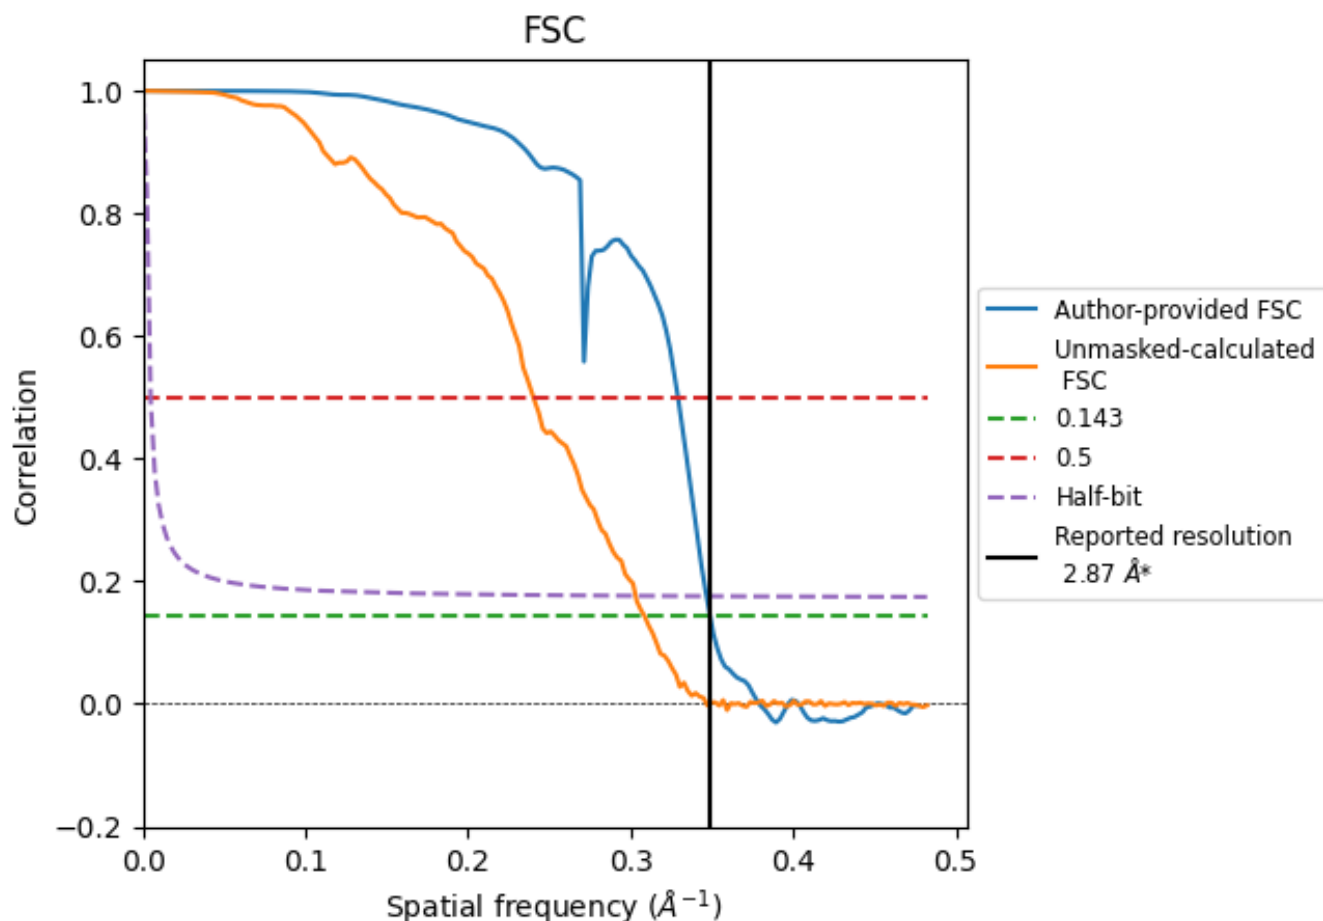

\*Reported resolution corresponds to spatial frequency of 0.348 Å<sup>-1</sup>

## 8.2 Resolution estimates [\(i\)](#)

| Resolution estimate (Å)   | Estimation criterion (FSC cut-off) |      |          |
|---------------------------|------------------------------------|------|----------|
|                           | 0.143                              | 0.5  | Half-bit |
| Reported by author        | 2.87                               | -    | -        |
| Author-provided FSC curve | 2.87                               | 3.04 | 2.88     |
| Unmasked-calculated*      | 3.24                               | 4.16 | 3.30     |

\*Resolution estimate based on FSC curve calculated by comparison of deposited half-maps. The value from deposited half-maps intersecting FSC 0.143 CUT-OFF 3.24 differs from the reported value 2.87 by more than 10 %

## 9 Map-model fit [i](#)

This section contains information regarding the fit between EMDB map EMD-70942 and PDB model 9OWS. Per-residue inclusion information can be found in section [3](#) on page [4](#).

### 9.1 Map-model overlay [i](#)

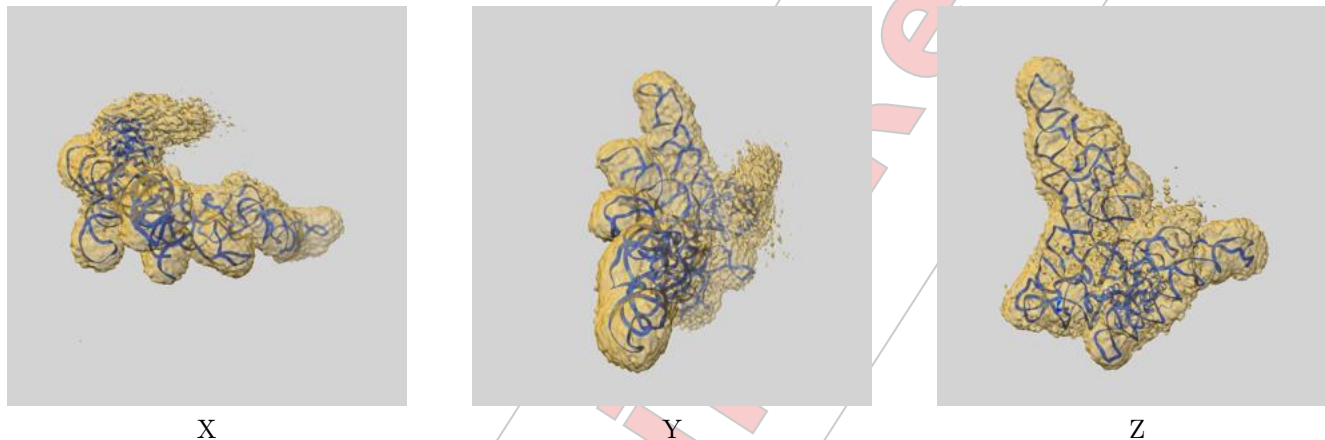

The images above show the 3D surface view of the map at the recommended contour level 0.03 at 50% transparency in yellow overlaid with a ribbon representation of the model coloured in blue. These images allow for the visual assessment of the quality of fit between the atomic model and the map.

## 9.2 Q-score mapped to coordinate model [\(i\)](#)

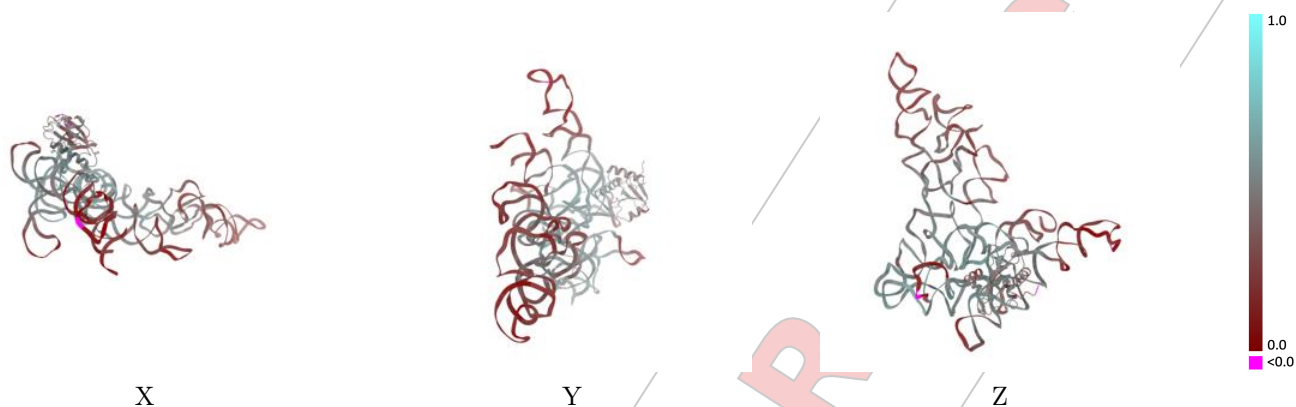

The images above show the model with each residue coloured according to its Q-score. This shows their resolvability in the map with higher Q-score values reflecting better resolvability. Please note: Q-score is calculating the resolvability of atoms, and thus high values are only expected at resolutions at which atoms can be resolved. Low Q-score values may therefore be expected for many entries.

## 9.3 Atom inclusion mapped to coordinate model [\(i\)](#)

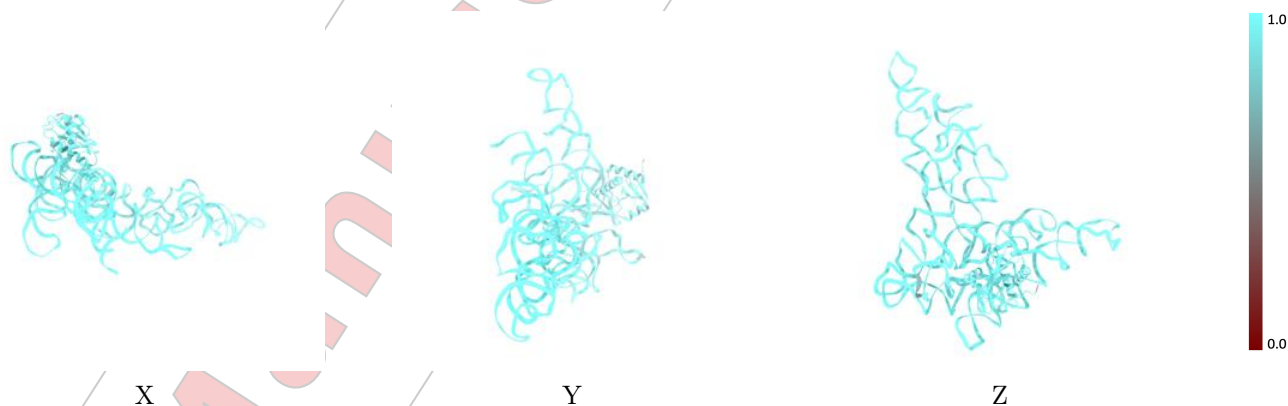

The images above show the model with each residue coloured according to its atom inclusion. This shows to what extent they are inside the map at the recommended contour level (0.03).

## 9.4 Atom inclusion [i](#)

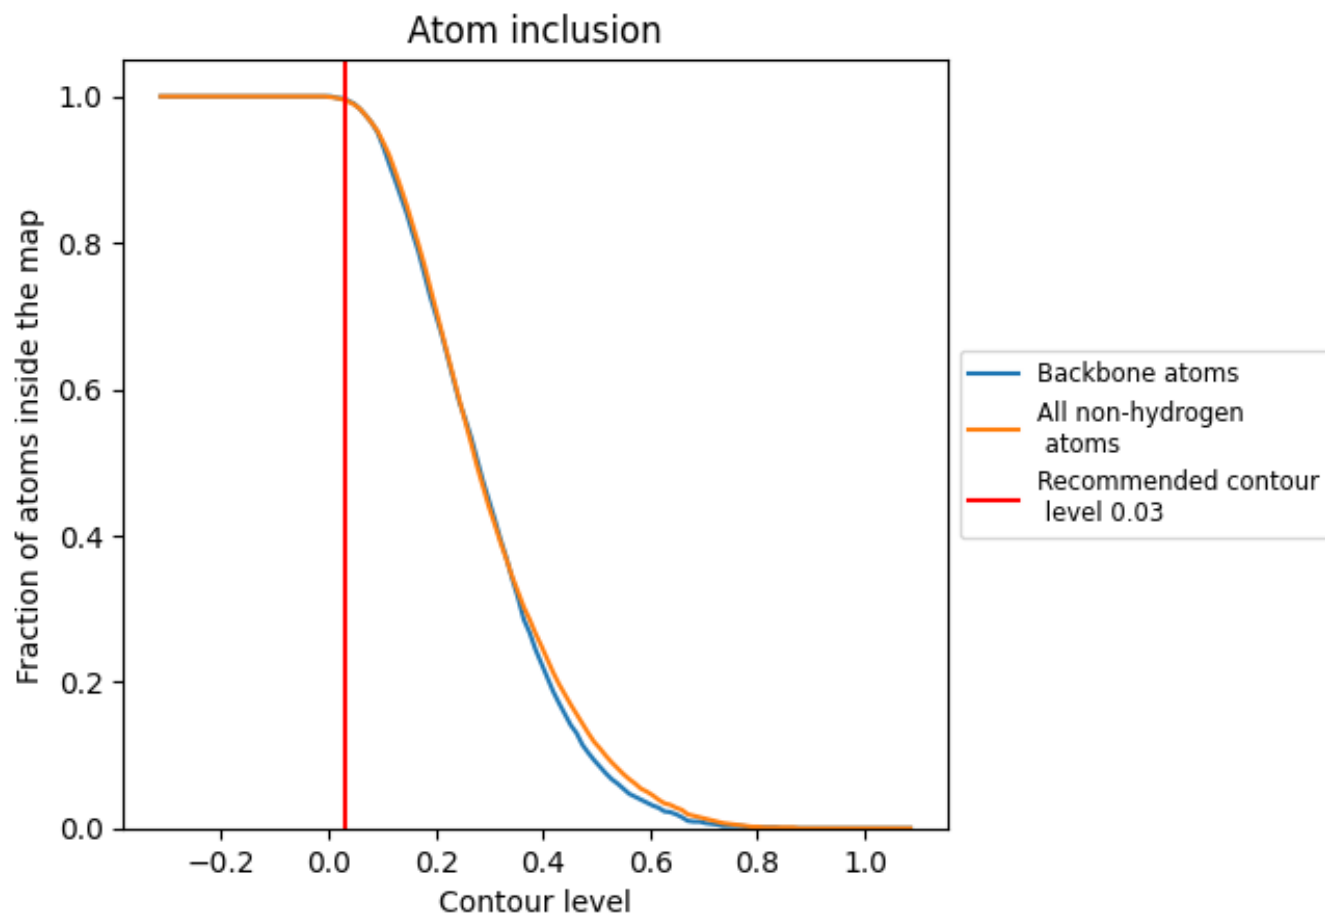

At the recommended contour level, 100% of all backbone atoms, 100% of all non-hydrogen atoms, are inside the map.

## 9.5 Map-model fit summary [i](#)

The table lists the average atom inclusion at the recommended contour level (0.03) and Q-score for the entire model and for each chain.

| Chain | Atom inclusion                                                                           | Q-score                                                                                  |
|-------|------------------------------------------------------------------------------------------|------------------------------------------------------------------------------------------|
| All   |  0.9950 |  0.3940 |
| A     |  0.9980 |  0.3900 |
| B     |  0.9660 |  0.4320 |





# Full wwPDB EM Validation Report ⓘ

Jun 4, 2025 – 02:46 PM EDT

PDB ID : 9OWT / pdb\_00009owt  
EMDB ID : EMD-70943  
Title : Structure of Geobacillus stearothermophilus RNase P holoenzyme in complex with precursor tRNA in 5 mM Ca<sup>2+</sup>  
Deposited on : 2025-06-02  
Resolution : 2.82 Å (reported)  
Based on initial model : 2A64

**This wwPDB validation report is for manuscript review**

This is a Full wwPDB EM Validation Report.

This report is produced by the wwPDB biocuration pipeline after annotation of the structure.

We welcome your comments at [validation@mail.wwpdb.org](mailto:validation@mail.wwpdb.org)

A user guide is available at

<https://www.wwpdb.org/validation/2017/EMValidationReportHelp>

with specific help available everywhere you see the ⓘ symbol.

The types of validation reports are described at

<http://www.wwpdb.org/validation/2017/FAQs#types>.

---

The following versions of software and data (see [references ⓘ](#)) were used in the production of this report:

EMDB validation analysis : 0.0.1.dev118  
MolProbity : 4-5-2 with Phenix2.0rc1  
Percentile statistics : 20231227.v01 (using entries in the PDB archive December 27th 2023)  
MapQ : 1.9.13  
Ideal geometry (proteins) : Engh & Huber (2001)  
Ideal geometry (DNA, RNA) : Parkinson et al. (1996)  
Validation Pipeline (wwPDB-VP) : 2.43.1

# 1 Overall quality at a glance i

The following experimental techniques were used to determine the structure:  
*ELECTRON MICROSCOPY*

The reported resolution of this entry is 2.82 Å.

Percentile scores (ranging between 0-100) for global validation metrics of the entry are shown in the following graphic. The table shows the number of entries on which the scores are based.

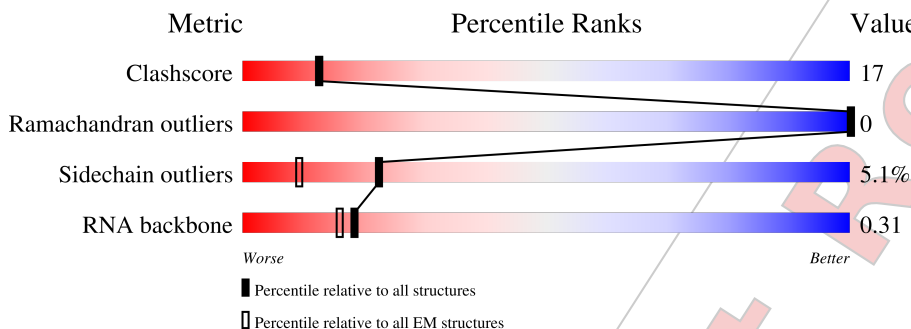

| Metric                | Whole archive (#Entries) | EM structures (#Entries) |
|-----------------------|--------------------------|--------------------------|
| Clashscore            | 210492                   | 15764                    |
| Ramachandran outliers | 207382                   | 16835                    |
| Sidechain outliers    | 206894                   | 16415                    |
| RNA backbone          | 6643                     | 2191                     |

The table below summarises the geometric issues observed across the polymeric chains and their fit to the map. The red, orange, yellow and green segments of the bar indicate the fraction of residues that contain outliers for  $\geq 3$ , 2, 1 and 0 types of geometric quality criteria respectively. A grey segment represents the fraction of residues that are not modelled. The numeric value for each fraction is indicated below the corresponding segment, with a dot representing fractions  $\leq 5\%$ . The upper red bar (where present) indicates the fraction of residues that have poor fit to the EM map (all-atom inclusion  $< 40\%$ ). The numeric value is given above the bar.

| Mol | Chain | Length | Quality of chain |
|-----|-------|--------|------------------|
| 1   | A     | 417    |                  |
| 2   | B     | 116    |                  |
| 3   | C     | 92     |                  |
| 3   | E     | 92     |                  |

## 2 Entry composition [i](#)

There are 4 unique types of molecules in this entry. The entry contains 12015 atoms, of which 0 are hydrogens and 0 are deuteriums.

In the tables below, the AltConf column contains the number of residues with at least one atom in alternate conformation and the Trace column contains the number of residues modelled with at most 2 atoms.

- Molecule 1 is a RNA chain called RNase P RNA (417-MER).

| Mol | Chain | Residues | Atoms |      |      |      |     | AltConf | Trace |
|-----|-------|----------|-------|------|------|------|-----|---------|-------|
|     |       |          | Total | C    | N    | O    | P   |         |       |
| 1   | A     | 417      | 8962  | 3996 | 1660 | 2889 | 417 | 0       | 0     |

- Molecule 2 is a protein called Ribonuclease P protein component.

| Mol | Chain | Residues | Atoms |     |     |     |   | AltConf | Trace |
|-----|-------|----------|-------|-----|-----|-----|---|---------|-------|
|     |       |          | Total | C   | N   | O   | S |         |       |
| 2   | B     | 116      | 947   | 608 | 174 | 162 | 3 | 0       | 0     |

There are 2 discrepancies between the modelled and reference sequences:

| Chain | Residue | Modelled | Actual | Comment        | Reference      |
|-------|---------|----------|--------|----------------|----------------|
| B     | 0       | GLY      | -      | expression tag | UNP A0A150N245 |
| B     | 64      | ILE      | VAL    | conflict       | UNP A0A150N245 |

- Molecule 3 is a RNA chain called precursor tRNA (89-MER).

| Mol | Chain | Residues | Atoms |     |     |     |    | AltConf | Trace |
|-----|-------|----------|-------|-----|-----|-----|----|---------|-------|
|     |       |          | Total | C   | N   | O   | P  |         |       |
| 3   | C     | 89       | 1889  | 842 | 326 | 632 | 89 | 0       | 0     |
| 3   | E     | 9        | 188   | 84  | 29  | 66  | 9  | 0       | 0     |

- Molecule 4 is CALCIUM ION (CCD ID: CA) (formula: Ca) (labeled as "Ligand of Interest" by depositor).

| Mol | Chain | Residues | Atoms |    | AltConf |
|-----|-------|----------|-------|----|---------|
| 4   | A     | 28       | Total | Ca | 0       |
|     |       |          | 28    | 28 |         |
| 4   | C     | 1        | Total | Ca | 0       |
|     |       |          | 1     | 1  |         |

### 3 Residue-property plots

These plots are drawn for all protein, RNA, DNA and oligosaccharide chains in the entry. The first graphic for a chain summarises the proportions of the various outlier classes displayed in the second graphic. The second graphic shows the sequence view annotated by issues in geometry and atom inclusion in map density. Residues are color-coded according to the number of geometric quality criteria for which they contain at least one outlier: green = 0, yellow = 1, orange = 2 and red = 3 or more. A red diamond above a residue indicates a poor fit to the EM map for this residue (all-atom inclusion < 40%). Stretches of 2 or more consecutive residues without any outlier are shown as a green connector. Residues present in the sample, but not in the model, are shown in grey.

● Molecule 1: RNase P RNA (417-MER)

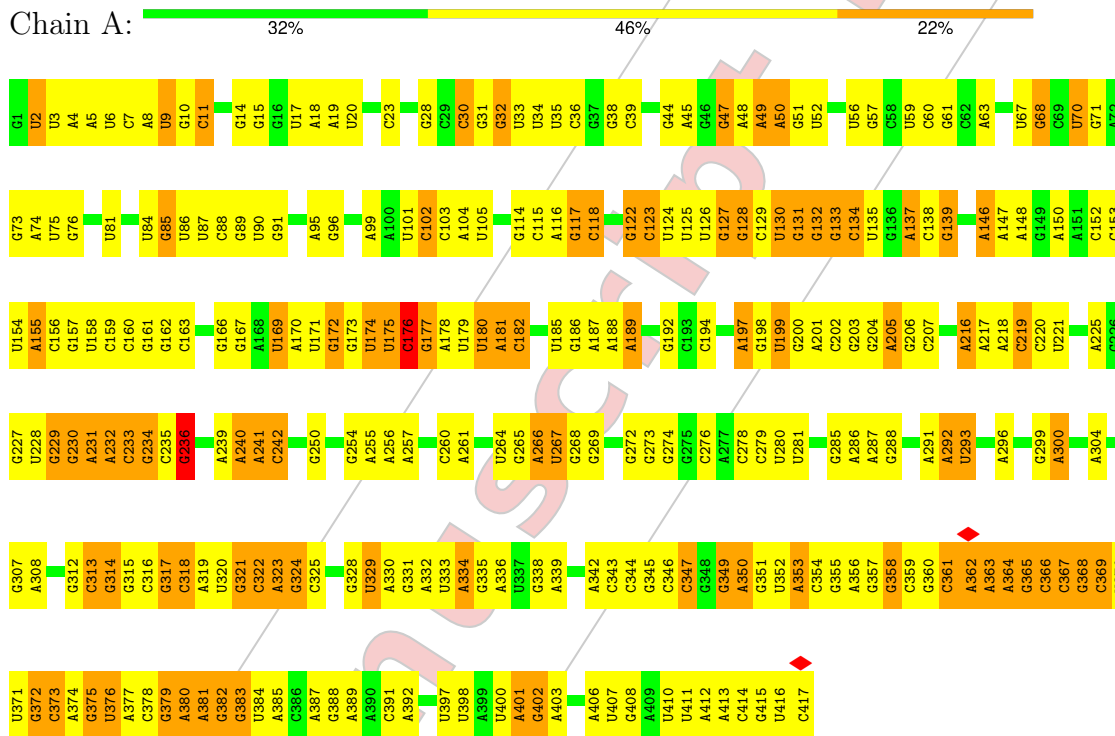

● Molecule 2: Ribonuclease P protein component

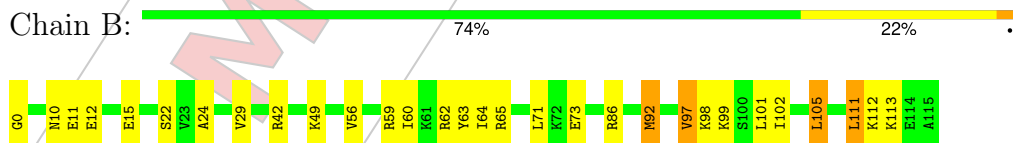

● Molecule 3: precursor tRNA (89-MER)

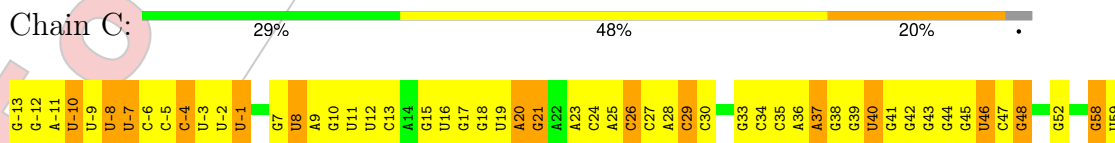

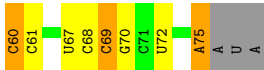

- Molecule 3: precursor tRNA (89-MER)

Chain E: • 5% • 90%

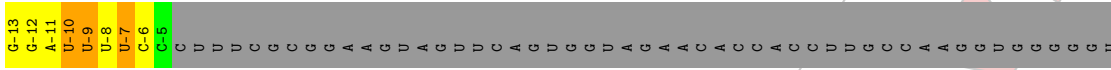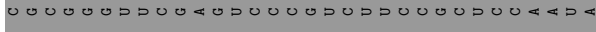

For Manuscript Review

## 4 Experimental information i

| Property                             | Value                                   | Source    |
|--------------------------------------|-----------------------------------------|-----------|
| EM reconstruction method             | SINGLE PARTICLE                         | Depositor |
| Imposed symmetry                     | POINT, Not provided                     |           |
| Number of particles used             | 176972                                  | Depositor |
| Resolution determination method      | FSC 0.143 CUT-OFF                       | Depositor |
| CTF correction method                | PHASE FLIPPING AND AMPLITUDE CORRECTION | Depositor |
| Microscope                           | FEI TALOS ARCTICA                       | Depositor |
| Voltage (kV)                         | 200                                     | Depositor |
| Electron dose ( $e^-/\text{\AA}^2$ ) | 57                                      | Depositor |
| Minimum defocus (nm)                 | 500                                     | Depositor |
| Maximum defocus (nm)                 | 1500                                    | Depositor |
| Magnification                        | Not provided                            |           |
| Image detector                       | GATAN K3 BIOQUANTUM (6k x 4k)           | Depositor |
| Maximum map value                    | 0.485                                   | Depositor |
| Minimum map value                    | -0.134                                  | Depositor |
| Average map value                    | 0.000                                   | Depositor |
| Map value standard deviation         | 0.007                                   | Depositor |
| Recommended contour level            | 0.026                                   | Depositor |
| Map size (Å)                         | 414.72, 414.72, 414.72                  | wwPDB     |
| Map dimensions                       | 400, 400, 400                           | wwPDB     |
| Map angles (°)                       | 90.0, 90.0, 90.0                        | wwPDB     |
| Pixel spacing (Å)                    | 1.0368, 1.0368, 1.0368                  | Depositor |

## 5 Model quality [i](#)

### 5.1 Standard geometry [i](#)

Bond lengths and bond angles in the following residue types are not validated in this section: CA

The Z score for a bond length (or angle) is the number of standard deviations the observed value is removed from the expected value. A bond length (or angle) with  $|Z| > 5$  is considered an outlier worth inspection. RMSZ is the root-mean-square of all Z scores of the bond lengths (or angles).

| Mol | Chain | Bond lengths |         | Bond angles |                |
|-----|-------|--------------|---------|-------------|----------------|
|     |       | RMSZ         | # Z  >5 | RMSZ        | # Z  >5        |
| 1   | A     | 0.52         | 0/10038 | 0.82        | 5/15661 (0.0%) |
| 2   | B     | 0.39         | 0/962   | 0.57        | 0/1281         |
| 3   | C     | 0.53         | 0/2107  | 0.81        | 3/3281 (0.1%)  |
| 3   | E     | 0.43         | 0/208   | 0.61        | 0/321          |
| All | All   | 0.51         | 0/13315 | 0.80        | 8/20544 (0.0%) |

Chiral center outliers are detected by calculating the chiral volume of a chiral center and verifying if the center is modelled as a planar moiety or with the opposite hand. A planarity outlier is detected by checking planarity of atoms in a peptide group, atoms in a mainchain group or atoms of a sidechain that are expected to be planar.

| Mol | Chain | #Chirality outliers | #Planarity outliers |
|-----|-------|---------------------|---------------------|
| 2   | B     | 0                   | 1                   |

There are no bond length outliers.

All (8) bond angle outliers are listed below:

| Mol | Chain | Res | Type | Atoms       | Z     | Observed(°) | Ideal(°) |
|-----|-------|-----|------|-------------|-------|-------------|----------|
| 1   | A     | 236 | G    | C4'-C3'-C2' | -5.82 | 96.78       | 102.60   |
| 3   | C     | 69  | C    | C4'-C3'-C2' | -5.68 | 96.92       | 102.60   |
| 3   | C     | 69  | C    | O3'-P-O5'   | -5.62 | 95.57       | 104.00   |
| 3   | C     | 46  | U    | C2'-C3'-O3' | 5.56  | 117.83      | 109.50   |
| 1   | A     | 176 | C    | C2'-C3'-O3' | 5.28  | 121.63      | 113.70   |
| 1   | A     | 240 | A    | C4'-C3'-C2' | -5.13 | 97.47       | 102.60   |
| 1   | A     | 139 | G    | O3'-P-O5'   | -5.12 | 96.31       | 104.00   |
| 1   | A     | 84  | U    | O3'-P-O5'   | -5.10 | 96.35       | 104.00   |

There are no chirality outliers.

All (1) planarity outliers are listed below:

| Mol | Chain | Res | Type | Group     |
|-----|-------|-----|------|-----------|
| 2   | B     | 59  | ARG  | Sidechain |

## 5.2 Too-close contacts [i](#)

In the following table, the Non-H and H(model) columns list the number of non-hydrogen atoms and hydrogen atoms in the chain respectively. The H(added) column lists the number of hydrogen atoms added and optimized by MolProbity. The Clashes column lists the number of clashes within the asymmetric unit, whereas Symm-Clashes lists symmetry-related clashes.

| Mol | Chain | Non-H | H(model) | H(added) | Clashes | Symm-Clashes |
|-----|-------|-------|----------|----------|---------|--------------|
| 1   | A     | 8962  | 0        | 4509     | 229     | 0            |
| 2   | B     | 947   | 0        | 1008     | 23      | 0            |
| 3   | C     | 1889  | 0        | 957      | 40      | 0            |
| 3   | E     | 188   | 0        | 96       | 8       | 0            |
| 4   | A     | 28    | 0        | 0        | 0       | 0            |
| 4   | C     | 1     | 0        | 0        | 0       | 0            |
| All | All   | 12015 | 0        | 6570     | 288     | 0            |

The all-atom clashscore is defined as the number of clashes found per 1000 atoms (including hydrogen atoms). The all-atom clashscore for this structure is 17.

All (288) close contacts within the same asymmetric unit are listed below, sorted by their clash magnitude.

| Atom-1         | Atom-2          | Interatomic distance (Å) | Clash overlap (Å) |
|----------------|-----------------|--------------------------|-------------------|
| 1:A:364:A:C4   | 1:A:365:G:H1'   | 1.96                     | 1.01              |
| 1:A:371:U:H5'' | 1:A:372:G:H5'   | 1.54                     | 0.89              |
| 1:A:349:G:H21  | 1:A:350:A:H62   | 1.24                     | 0.85              |
| 3:C:8:U:H5'    | 3:C:48:G:H5'    | 1.55                     | 0.85              |
| 1:A:367:C:H2'  | 1:A:368:G:C8    | 2.15                     | 0.81              |
| 1:A:363:A:H2'  | 1:A:364:A:C4    | 2.13                     | 0.81              |
| 1:A:234:G:H2'  | 1:A:236:G:H5'   | 1.63                     | 0.79              |
| 1:A:378:C:H3'  | 1:A:379:G:C8    | 2.19                     | 0.77              |
| 1:A:45:A:H62   | 2:B:62:ARG:NH2  | 1.84                     | 0.75              |
| 1:A:127:G:H2'  | 1:A:128:G:H4'   | 1.66                     | 0.74              |
| 1:A:45:A:C2    | 1:A:388:G:H2'   | 2.24                     | 0.73              |
| 3:C:-11:A:H2   | 3:E:-7:U:H3     | 1.35                     | 0.73              |
| 2:B:63:TYR:HB3 | 2:B:97:VAL:HG11 | 1.72                     | 0.70              |
| 3:E:-13:G:H2'  | 3:E:-12:G:O4'   | 1.91                     | 0.70              |
| 1:A:363:A:C8   | 1:A:363:A:H5''  | 2.28                     | 0.68              |
| 1:A:364:A:C5   | 1:A:365:G:H1'   | 2.27                     | 0.68              |
| 1:A:349:G:H22  | 1:A:379:G:H1'   | 1.58                     | 0.68              |

Continued on next page...

Continued from previous page...

| Atom-1          | Atom-2           | Interatomic distance (Å) | Clash overlap (Å) |
|-----------------|------------------|--------------------------|-------------------|
| 1:A:47:G:H1     | 1:A:385:A:H62    | 1.39                     | 0.68              |
| 1:A:9:U:H2'     | 1:A:10:G:H8      | 1.57                     | 0.68              |
| 1:A:203:G:C5    | 1:A:205:A:H1'    | 2.29                     | 0.68              |
| 1:A:50:A:C8     | 1:A:50:A:H5''    | 2.29                     | 0.68              |
| 2:B:0:GLY:HA3   | 2:B:65:ARG:HB3   | 1.75                     | 0.67              |
| 1:A:364:A:H3'   | 1:A:365:G:O4'    | 1.95                     | 0.67              |
| 1:A:180:U:H2'   | 1:A:181:A:H8     | 1.59                     | 0.66              |
| 1:A:378:C:H3'   | 1:A:379:G:H8     | 1.59                     | 0.66              |
| 1:A:350:A:H1'   | 1:A:380:A:C2     | 2.31                     | 0.66              |
| 1:A:349:G:N2    | 1:A:350:A:H62    | 1.93                     | 0.65              |
| 1:A:349:G:N2    | 1:A:379:G:H1'    | 2.10                     | 0.65              |
| 1:A:18:A:H2'    | 1:A:19:A:H8      | 1.62                     | 0.65              |
| 1:A:374:A:H2'   | 1:A:375:G:C8     | 2.32                     | 0.65              |
| 1:A:161:G:H3'   | 1:A:162:G:H8     | 1.62                     | 0.64              |
| 1:A:146:A:H4'   | 1:A:146:A:OP1    | 1.97                     | 0.63              |
| 1:A:172:G:H1'   | 1:A:217:A:H61    | 1.63                     | 0.63              |
| 3:C:-7:U:H2'    | 3:C:-6:C:C6      | 2.33                     | 0.63              |
| 1:A:102:C:H2'   | 1:A:103:C:O4'    | 1.99                     | 0.63              |
| 1:A:181:A:C2    | 1:A:182:C:H1'    | 2.33                     | 0.63              |
| 3:C:27:C:H2'    | 3:C:28:A:C8      | 2.35                     | 0.62              |
| 1:A:316:C:H2'   | 1:A:317:G:C8     | 2.35                     | 0.62              |
| 1:A:45:A:H62    | 2:B:62:ARG:HH22  | 1.47                     | 0.62              |
| 1:A:160:C:H3'   | 1:A:161:G:H8     | 1.64                     | 0.61              |
| 2:B:56:VAL:O    | 2:B:60:ILE:HG13  | 1.99                     | 0.61              |
| 1:A:3:U:H2'     | 1:A:4:A:C8       | 2.36                     | 0.61              |
| 1:A:18:A:H2'    | 1:A:19:A:C8      | 2.37                     | 0.60              |
| 1:A:350:A:H1'   | 1:A:380:A:N1     | 2.17                     | 0.59              |
| 1:A:379:G:H4'   | 1:A:380:A:H8     | 1.66                     | 0.59              |
| 1:A:363:A:O3'   | 1:A:364:A:O4'    | 2.15                     | 0.59              |
| 2:B:64:ILE:HG23 | 2:B:101:LEU:HD21 | 1.84                     | 0.59              |
| 2:B:12:GLU:HG2  | 2:B:42:ARG:HH22  | 1.67                     | 0.59              |
| 1:A:379:G:H4'   | 1:A:380:A:C8     | 2.37                     | 0.59              |
| 1:A:137:A:C8    | 1:A:137:A:H5''   | 2.38                     | 0.59              |
| 1:A:364:A:OP1   | 1:A:365:G:N7     | 2.35                     | 0.58              |
| 1:A:137:A:H5''  | 1:A:137:A:H8     | 1.67                     | 0.58              |
| 1:A:3:U:H2'     | 1:A:4:A:H8       | 1.67                     | 0.58              |
| 1:A:130:U:H2'   | 1:A:131:G:C8     | 2.38                     | 0.58              |
| 1:A:360:G:N2    | 1:A:363:A:H5''   | 2.18                     | 0.58              |
| 1:A:9:U:H2'     | 1:A:10:G:C8      | 2.39                     | 0.58              |
| 1:A:360:G:H22   | 1:A:363:A:H5''   | 1.68                     | 0.57              |
| 1:A:32:G:H22    | 1:A:34:U:H1'     | 1.68                     | 0.57              |

Continued on next page...

Continued from previous page...

| Atom-1         | Atom-2          | Interatomic distance (Å) | Clash overlap (Å) |
|----------------|-----------------|--------------------------|-------------------|
| 3:C:-11:A:H2'  | 3:C:-10:U:C6    | 2.40                     | 0.57              |
| 3:C:38:G:H2'   | 3:C:39:G:C8     | 2.40                     | 0.57              |
| 1:A:6:U:H2'    | 1:A:7:C:C6      | 2.40                     | 0.57              |
| 1:A:307:G:H2'  | 1:A:308:A:H8    | 1.70                     | 0.57              |
| 2:B:22:SER:HG  | 3:C:-4:C:H5     | 1.50                     | 0.57              |
| 1:A:4:A:H2'    | 1:A:5:A:H8      | 1.70                     | 0.56              |
| 1:A:2:U:H2'    | 1:A:3:U:C6      | 2.40                     | 0.56              |
| 1:A:14:G:H2'   | 1:A:385:A:N1    | 2.21                     | 0.56              |
| 1:A:133:G:O2'  | 1:A:134:C:H5'   | 2.06                     | 0.56              |
| 1:A:85:G:O2'   | 1:A:87:U:O4     | 2.24                     | 0.56              |
| 1:A:308:A:N1   | 1:A:329:U:H5    | 2.04                     | 0.56              |
| 3:C:26:C:H2'   | 3:C:27:C:C6     | 2.41                     | 0.56              |
| 1:A:360:G:H22  | 1:A:363:A:C5'   | 2.19                     | 0.56              |
| 3:C:-9:U:H3    | 3:E:-9:U:H3     | 1.54                     | 0.56              |
| 1:A:154:U:H2'  | 1:A:155:A:C4    | 2.40                     | 0.55              |
| 1:A:315:G:H2'  | 1:A:316:C:C6    | 2.40                     | 0.55              |
| 1:A:364:A:H3'  | 1:A:364:A:OP2   | 2.05                     | 0.55              |
| 1:A:412:A:H2'  | 1:A:413:A:C8    | 2.42                     | 0.55              |
| 3:E:-7:U:H2'   | 3:E:-6:C:C6     | 2.42                     | 0.55              |
| 1:A:10:G:H2'   | 1:A:11:C:H6     | 1.70                     | 0.55              |
| 1:A:364:A:OP2  | 1:A:365:G:O4'   | 2.21                     | 0.55              |
| 1:A:49:A:N1    | 1:A:387:A:O2'   | 2.37                     | 0.55              |
| 1:A:5:A:H2'    | 1:A:6:U:C6      | 2.42                     | 0.55              |
| 1:A:59:U:H2'   | 1:A:60:C:C6     | 2.42                     | 0.54              |
| 2:B:92:MET:HB3 | 2:B:97:VAL:HG23 | 1.88                     | 0.54              |
| 1:A:241:A:H2'  | 1:A:242:C:C6    | 2.42                     | 0.54              |
| 1:A:85:G:H4'   | 1:A:85:G:OP1    | 2.08                     | 0.54              |
| 1:A:229:G:H5'  | 1:A:230:G:OP2   | 2.08                     | 0.54              |
| 1:A:7:C:H2'    | 1:A:8:A:H8      | 1.72                     | 0.54              |
| 1:A:414:C:H2'  | 1:A:415:G:H8    | 1.72                     | 0.54              |
| 1:A:364:A:C3'  | 1:A:365:G:O4'   | 2.56                     | 0.53              |
| 1:A:5:A:H2'    | 1:A:6:U:H6      | 1.72                     | 0.53              |
| 1:A:122:G:H3'  | 1:A:123:C:H5''  | 1.90                     | 0.53              |
| 3:C:8:U:H5'    | 3:C:48:G:C5'    | 2.35                     | 0.53              |
| 1:A:160:C:H3'  | 1:A:161:G:C8    | 2.43                     | 0.53              |
| 1:A:197:A:H2   | 1:A:229:G:H1'   | 1.74                     | 0.53              |
| 1:A:264:U:H2'  | 1:A:265:G:O4'   | 2.09                     | 0.53              |
| 1:A:349:G:O6   | 1:A:379:G:N2    | 2.42                     | 0.52              |
| 1:A:166:G:H2'  | 1:A:167:G:C8    | 2.44                     | 0.52              |
| 3:C:40:U:H2'   | 3:C:41:G:C8     | 2.44                     | 0.52              |
| 1:A:216:A:O2'  | 1:A:217:A:H8    | 1.93                     | 0.52              |

Continued on next page...

*Continued from previous page...*

| Atom-1         | Atom-2        | Interatomic distance (Å) | Clash overlap (Å) |
|----------------|---------------|--------------------------|-------------------|
| 1:A:4:A:H2'    | 1:A:5:A:C8    | 2.44                     | 0.52              |
| 1:A:363:A:H5'' | 1:A:363:A:H8  | 1.74                     | 0.51              |
| 3:C:-8:U:C2    | 3:C:-7:U:C5   | 2.99                     | 0.51              |
| 1:A:219:C:H2'  | 1:A:220:C:H6  | 1.76                     | 0.51              |
| 1:A:128:G:H2'  | 1:A:129:C:C6  | 2.46                     | 0.51              |
| 1:A:6:U:H2'    | 1:A:7:C:H6    | 1.74                     | 0.50              |
| 1:A:70:U:H2'   | 1:A:71:G:O4'  | 2.10                     | 0.50              |
| 1:A:124:U:H2'  | 1:A:125:U:O4' | 2.11                     | 0.50              |
| 1:A:267:U:C2   | 3:C:75:A:C2   | 2.99                     | 0.50              |
| 1:A:361:C:O2'  | 1:A:362:A:H3' | 2.12                     | 0.50              |
| 1:A:180:U:H2'  | 1:A:181:A:C8  | 2.45                     | 0.50              |
| 1:A:356:A:H3'  | 1:A:357:G:H8  | 1.77                     | 0.50              |
| 1:A:363:A:O2'  | 1:A:364:A:C1' | 2.60                     | 0.50              |
| 1:A:10:G:H2'   | 1:A:11:C:C6   | 2.47                     | 0.50              |
| 1:A:307:G:H2'  | 1:A:308:A:C8  | 2.47                     | 0.50              |
| 3:C:29:C:H2'   | 3:C:30:C:C6   | 2.47                     | 0.50              |
| 1:A:186:G:N1   | 1:A:189:A:OP2 | 2.35                     | 0.50              |
| 1:A:161:G:H3'  | 1:A:162:G:C8  | 2.45                     | 0.50              |
| 1:A:373:C:H2'  | 1:A:374:A:C8  | 2.47                     | 0.50              |
| 1:A:181:A:H2'  | 1:A:182:C:O4' | 2.12                     | 0.49              |
| 1:A:349:G:H4'  | 1:A:350:A:H5' | 1.94                     | 0.49              |
| 1:A:71:G:N2    | 1:A:73:G:H3'  | 2.26                     | 0.49              |
| 1:A:85:G:H1'   | 1:A:86:U:H5   | 1.77                     | 0.49              |
| 1:A:344:C:H2'  | 1:A:345:G:C8  | 2.47                     | 0.49              |
| 3:E:-10:U:H2'  | 3:E:-9:U:C6   | 2.47                     | 0.49              |
| 1:A:317:G:N1   | 1:A:321:G:C2  | 2.79                     | 0.49              |
| 3:C:-7:U:H2'   | 3:C:-6:C:H6   | 1.78                     | 0.49              |
| 1:A:19:A:H2'   | 1:A:20:U:C6   | 2.48                     | 0.48              |
| 1:A:7:C:H2'    | 1:A:8:A:C8    | 2.49                     | 0.48              |
| 1:A:280:U:H2'  | 1:A:281:U:C6  | 2.49                     | 0.48              |
| 1:A:401:A:H2'  | 1:A:402:G:O4' | 2.13                     | 0.48              |
| 1:A:178:A:OP1  | 1:A:180:U:H1' | 2.14                     | 0.48              |
| 1:A:347:C:H1'  | 1:A:383:G:N2  | 2.29                     | 0.48              |
| 1:A:23:C:O2    | 1:A:336:A:O2' | 2.28                     | 0.48              |
| 1:A:230:G:C5'  | 1:A:230:G:H8  | 2.26                     | 0.48              |
| 1:A:280:U:H2'  | 1:A:281:U:H6  | 1.79                     | 0.48              |
| 1:A:338:G:H2'  | 1:A:339:A:C8  | 2.49                     | 0.48              |
| 1:A:268:G:H2'  | 1:A:269:G:H8  | 1.79                     | 0.48              |
| 1:A:385:A:H1'  | 1:A:401:A:C8  | 2.49                     | 0.48              |
| 1:A:115:C:H2'  | 1:A:116:A:C8  | 2.48                     | 0.47              |
| 1:A:230:G:H8   | 1:A:230:G:H5' | 1.79                     | 0.47              |

*Continued on next page...*

Continued from previous page...

| Atom-1           | Atom-2         | Interatomic distance (Å) | Clash overlap (Å) |
|------------------|----------------|--------------------------|-------------------|
| 1:A:197:A:H2'    | 1:A:228:U:O2'  | 2.15                     | 0.47              |
| 1:A:216:A:HO2'   | 1:A:217:A:H8   | 1.62                     | 0.47              |
| 1:A:335:G:C8     | 1:A:335:G:H3'  | 2.49                     | 0.47              |
| 1:A:180:U:O2'    | 1:A:181:A:H5'  | 2.13                     | 0.47              |
| 3:C:41:G:H2'     | 3:C:42:G:C8    | 2.49                     | 0.47              |
| 1:A:30:C:H2'     | 1:A:31:G:C8    | 2.49                     | 0.47              |
| 1:A:354:C:H2'    | 1:A:355:G:C8   | 2.49                     | 0.47              |
| 1:A:176:C:H2'    | 1:A:177:G:C8   | 2.49                     | 0.47              |
| 3:C:-9:U:O2'     | 3:C:-8:U:H5'   | 2.14                     | 0.47              |
| 1:A:155:A:H2'    | 1:A:156:C:C6   | 2.50                     | 0.47              |
| 1:A:360:G:H1'    | 1:A:365:G:N2   | 2.29                     | 0.47              |
| 1:A:411:U:H2'    | 1:A:412:A:C8   | 2.48                     | 0.47              |
| 2:B:112:LYS:O    | 2:B:113:LYS:C  | 2.58                     | 0.47              |
| 3:C:-8:U:HO2'    | 3:C:-7:U:H6    | 1.62                     | 0.47              |
| 1:A:175:U:H2'    | 1:A:176:C:O4'  | 2.15                     | 0.47              |
| 1:A:233:C:H4'    | 1:A:234:G:O5'  | 2.15                     | 0.47              |
| 3:C:60:C:H2'     | 3:C:61:C:H6    | 1.80                     | 0.47              |
| 2:B:105:LEU:HD12 | 2:B:105:LEU:HA | 1.80                     | 0.47              |
| 3:C:27:C:H2'     | 3:C:28:A:H8    | 1.80                     | 0.47              |
| 1:A:198:G:N2     | 1:A:200:G:H3'  | 2.30                     | 0.46              |
| 1:A:376:U:H2'    | 1:A:377:A:C8   | 2.49                     | 0.46              |
| 3:C:24:C:H2'     | 3:C:25:A:C8    | 2.51                     | 0.46              |
| 1:A:338:G:H2'    | 1:A:339:A:H8   | 1.80                     | 0.46              |
| 1:A:371:U:H4'    | 1:A:373:C:H5   | 1.79                     | 0.46              |
| 1:A:319:A:H1'    | 1:A:320:U:C5   | 2.51                     | 0.46              |
| 2:B:111:LEU:C    | 2:B:113:LYS:N  | 2.72                     | 0.46              |
| 1:A:352:U:H2'    | 1:A:353:A:C8   | 2.51                     | 0.46              |
| 1:A:229:G:N2     | 1:A:231:A:H3'  | 2.29                     | 0.46              |
| 1:A:285:G:O2'    | 1:A:300:A:N6   | 2.49                     | 0.46              |
| 1:A:350:A:C1'    | 1:A:380:A:N1   | 2.78                     | 0.46              |
| 1:A:50:A:C8      | 1:A:50:A:C5'   | 2.99                     | 0.46              |
| 1:A:147:A:H2'    | 1:A:148:A:C8   | 2.51                     | 0.46              |
| 1:A:292:A:H2'    | 1:A:293:U:C6   | 2.51                     | 0.46              |
| 1:A:101:U:OP2    | 1:A:279:C:H4'  | 2.17                     | 0.45              |
| 1:A:130:U:H2'    | 1:A:131:G:H8   | 1.78                     | 0.45              |
| 1:A:268:G:C2     | 3:C:75:A:C2    | 3.04                     | 0.45              |
| 3:C:-13:G:C4     | 3:C:-12:G:C8   | 3.05                     | 0.45              |
| 3:C:37:A:H2'     | 3:C:38:G:C8    | 2.51                     | 0.45              |
| 1:A:331:G:H4'    | 1:A:332:A:H5'  | 1.98                     | 0.45              |
| 1:A:154:U:H4'    | 1:A:218:A:H4'  | 1.99                     | 0.45              |
| 1:A:360:G:H3'    | 1:A:361:C:H6   | 1.82                     | 0.45              |

Continued on next page...

Continued from previous page...

| Atom-1          | Atom-2           | Interatomic distance (Å) | Clash overlap (Å) |
|-----------------|------------------|--------------------------|-------------------|
| 1:A:380:A:H2'   | 1:A:380:A:N3     | 2.32                     | 0.45              |
| 2:B:24:ALA:HB2  | 2:B:29:VAL:HG13  | 1.98                     | 0.45              |
| 1:A:60:C:H2'    | 1:A:61:G:H8      | 1.82                     | 0.45              |
| 2:B:86:ARG:HH22 | 3:E:-13:G:H21    | 1.64                     | 0.45              |
| 2:B:111:LEU:C   | 2:B:113:LYS:H    | 2.25                     | 0.45              |
| 1:A:416:U:H2'   | 1:A:417:C:O4'    | 2.17                     | 0.45              |
| 2:B:49:LYS:HG3  | 3:C:-1:U:O5'     | 2.17                     | 0.45              |
| 1:A:292:A:H2'   | 1:A:293:U:H6     | 1.82                     | 0.44              |
| 1:A:32:G:H2'    | 1:A:32:G:N3      | 2.32                     | 0.44              |
| 1:A:68:G:N3     | 1:A:68:G:H2'     | 2.31                     | 0.44              |
| 2:B:99:LYS:HD3  | 2:B:99:LYS:O     | 2.17                     | 0.44              |
| 1:A:17:U:H2'    | 1:A:18:A:H8      | 1.82                     | 0.44              |
| 1:A:114:G:H2'   | 1:A:115:C:C6     | 2.52                     | 0.44              |
| 2:B:12:GLU:HG2  | 2:B:42:ARG:NH2   | 2.32                     | 0.44              |
| 3:C:-9:U:H2'    | 3:C:-8:U:C6      | 2.53                     | 0.44              |
| 3:E:-9:U:H2'    | 3:E:-8:U:H6      | 1.83                     | 0.44              |
| 1:A:363:A:O2'   | 1:A:364:A:O4'    | 2.33                     | 0.44              |
| 1:A:219:C:H2'   | 1:A:220:C:C6     | 2.52                     | 0.44              |
| 1:A:364:A:H2'   | 1:A:365:G:O4'    | 2.18                     | 0.44              |
| 1:A:365:G:H2'   | 1:A:365:G:N3     | 2.33                     | 0.44              |
| 1:A:414:C:H2'   | 1:A:415:G:C8     | 2.53                     | 0.44              |
| 3:C:-10:U:C2    | 3:C:-9:U:C5      | 3.06                     | 0.44              |
| 1:A:32:G:N2     | 1:A:34:U:H1'     | 2.32                     | 0.43              |
| 1:A:71:G:O2'    | 1:A:73:G:N7      | 2.31                     | 0.43              |
| 1:A:123:C:H2'   | 1:A:124:U:O4'    | 2.18                     | 0.43              |
| 3:E:-9:U:H2'    | 3:E:-8:U:C6      | 2.53                     | 0.43              |
| 1:A:166:G:H2'   | 1:A:167:G:H8     | 1.83                     | 0.43              |
| 1:A:350:A:C8    | 1:A:380:A:C6     | 3.06                     | 0.43              |
| 1:A:355:G:H2'   | 1:A:356:A:C8     | 2.54                     | 0.43              |
| 1:A:380:A:C2    | 1:A:381:A:H1'    | 2.54                     | 0.43              |
| 2:B:11:GLU:O    | 2:B:15:GLU:HG3   | 2.19                     | 0.43              |
| 1:A:14:G:C2'    | 1:A:401:A:H61    | 2.31                     | 0.43              |
| 1:A:217:A:H2'   | 1:A:218:A:O4'    | 2.18                     | 0.43              |
| 1:A:317:G:C5    | 1:A:318:C:N3     | 2.86                     | 0.43              |
| 1:A:382:G:H2'   | 1:A:383:G:O4'    | 2.18                     | 0.43              |
| 1:A:169:U:H2'   | 1:A:170:A:C8     | 2.54                     | 0.43              |
| 1:A:358:G:H1    | 1:A:366:C:H42    | 1.66                     | 0.43              |
| 2:B:98:LYS:O    | 2:B:102:ILE:HD13 | 2.19                     | 0.43              |
| 3:C:16:U:H5     | 3:C:58:G:O6      | 2.02                     | 0.43              |
| 3:C:34:C:H2'    | 3:C:35:C:H6      | 1.83                     | 0.43              |
| 1:A:50:A:N3     | 1:A:50:A:H2'     | 2.34                     | 0.42              |

Continued on next page...

Continued from previous page...

| Atom-1         | Atom-2          | Interatomic distance (Å) | Clash overlap (Å) |
|----------------|-----------------|--------------------------|-------------------|
| 1:A:59:U:H2'   | 1:A:60:C:H6     | 1.84                     | 0.42              |
| 1:A:134:C:H2'  | 1:A:135:U:C6    | 2.55                     | 0.42              |
| 3:C:16:U:C5    | 3:C:58:G:O6     | 2.72                     | 0.42              |
| 1:A:343:C:H2'  | 1:A:344:C:C6    | 2.54                     | 0.42              |
| 1:A:354:C:H2'  | 1:A:355:G:O4'   | 2.19                     | 0.42              |
| 1:A:132:G:H3'  | 1:A:133:G:H8    | 1.83                     | 0.42              |
| 1:A:220:C:H2'  | 1:A:221:U:H6    | 1.85                     | 0.42              |
| 1:A:313:C:H2'  | 1:A:314:G:C8    | 2.54                     | 0.42              |
| 3:C:-10:U:H2'  | 3:C:-9:U:C6     | 2.55                     | 0.42              |
| 1:A:334:A:H62  | 2:B:10:ASN:HD22 | 1.68                     | 0.42              |
| 1:A:17:U:H2'   | 1:A:18:A:C8     | 2.55                     | 0.42              |
| 1:A:89:G:H2'   | 1:A:90:U:C6     | 2.54                     | 0.42              |
| 1:A:128:G:H2'  | 1:A:129:C:H6    | 1.82                     | 0.42              |
| 1:A:324:G:H2'  | 1:A:325:C:H6    | 1.84                     | 0.42              |
| 1:A:335:G:C8   | 1:A:335:G:C3'   | 3.03                     | 0.42              |
| 1:A:349:G:N2   | 1:A:378:C:C2    | 2.88                     | 0.42              |
| 3:C:42:G:H2'   | 3:C:43:G:C8     | 2.55                     | 0.42              |
| 1:A:174:U:H2'  | 1:A:175:U:C6    | 2.54                     | 0.42              |
| 1:A:186:G:N2   | 1:A:188:A:H3'   | 2.34                     | 0.42              |
| 1:A:95:A:H2'   | 1:A:96:G:C8     | 2.55                     | 0.42              |
| 1:A:115:C:H2'  | 1:A:116:A:H8    | 1.85                     | 0.42              |
| 3:C:21:G:H8    | 3:C:21:G:OP2    | 2.03                     | 0.42              |
| 3:C:35:C:H2'   | 3:C:36:A:O4'    | 2.20                     | 0.42              |
| 1:A:260:C:H2'  | 1:A:261:A:O4'   | 2.20                     | 0.42              |
| 1:A:308:A:N1   | 1:A:329:U:C5    | 2.88                     | 0.42              |
| 1:A:344:C:H2'  | 1:A:345:G:H8    | 1.85                     | 0.42              |
| 1:A:56:U:H2'   | 1:A:57:G:H8     | 1.85                     | 0.41              |
| 1:A:322:C:H2'  | 1:A:323:A:C8    | 2.55                     | 0.41              |
| 2:B:73:GLU:OE1 | 2:B:73:GLU:N    | 2.52                     | 0.41              |
| 1:A:19:A:H2'   | 1:A:20:U:H6     | 1.85                     | 0.41              |
| 1:A:102:C:O5'  | 1:A:102:C:H6    | 2.03                     | 0.41              |
| 1:A:117:G:H3'  | 1:A:118:C:H6    | 1.86                     | 0.41              |
| 1:A:95:A:H2'   | 1:A:96:G:H8     | 1.85                     | 0.41              |
| 1:A:267:U:C4   | 3:C:75:A:C4     | 3.08                     | 0.41              |
| 1:A:279:C:H2'  | 1:A:280:U:C6    | 2.55                     | 0.41              |
| 1:A:287:A:H3'  | 1:A:288:G:H8    | 1.86                     | 0.41              |
| 1:A:321:G:H2'  | 1:A:322:C:C6    | 2.55                     | 0.41              |
| 1:A:334:A:H62  | 2:B:10:ASN:ND2  | 2.17                     | 0.41              |
| 1:A:9:U:C2     | 1:A:10:G:C8     | 3.09                     | 0.41              |
| 1:A:227:G:O2'  | 1:A:228:U:H5'   | 2.19                     | 0.41              |
| 1:A:335:G:H3'  | 1:A:335:G:H8    | 1.85                     | 0.41              |

Continued on next page...

Continued from previous page...

| Atom-1        | Atom-2        | Interatomic distance (Å) | Clash overlap (Å) |
|---------------|---------------|--------------------------|-------------------|
| 1:A:194:C:O2' | 1:A:230:G:O6  | 2.38                     | 0.41              |
| 1:A:220:C:H2' | 1:A:221:U:C6  | 2.56                     | 0.41              |
| 1:A:229:G:N1  | 1:A:232:A:OP2 | 2.54                     | 0.41              |
| 1:A:352:U:H2' | 1:A:353:A:H8  | 1.86                     | 0.41              |
| 1:A:356:A:H3' | 1:A:357:G:C8  | 2.56                     | 0.41              |
| 3:C:67:U:H2'  | 3:C:68:C:O4'  | 2.20                     | 0.41              |
| 1:A:38:G:H2'  | 1:A:39:C:C6   | 2.55                     | 0.41              |
| 1:A:279:C:H2' | 1:A:280:U:H6  | 1.85                     | 0.41              |
| 1:A:364:A:H3' | 1:A:364:A:P   | 2.60                     | 0.41              |
| 1:A:350:A:C4  | 1:A:380:A:C5  | 3.09                     | 0.41              |
| 3:C:-9:U:C2   | 3:C:-8:U:C5   | 3.09                     | 0.41              |
| 1:A:2:U:H2'   | 1:A:3:U:H6    | 1.84                     | 0.41              |
| 1:A:180:U:C2' | 1:A:181:A:H5' | 2.51                     | 0.41              |
| 1:A:199:U:O2  | 1:A:199:U:O4' | 2.38                     | 0.41              |
| 1:A:350:A:C4  | 1:A:380:A:C4  | 3.09                     | 0.41              |
| 1:A:380:A:C2  | 1:A:381:A:N9  | 2.89                     | 0.41              |
| 1:A:89:G:H2'  | 1:A:90:U:H6   | 1.86                     | 0.41              |
| 1:A:286:A:N6  | 1:A:299:G:H1' | 2.36                     | 0.40              |
| 1:A:397:U:H2' | 1:A:398:U:C6  | 2.56                     | 0.40              |
| 3:C:-13:G:H3' | 3:C:-12:G:H8  | 1.87                     | 0.40              |
| 1:A:353:A:H2' | 1:A:354:C:O4' | 2.21                     | 0.40              |
| 3:C:8:U:O2    | 3:C:20:A:H2   | 2.04                     | 0.40              |
| 3:C:60:C:H2'  | 3:C:61:C:C6   | 2.56                     | 0.40              |
| 1:A:266:A:N3  | 1:A:266:A:H2' | 2.36                     | 0.40              |
| 1:A:369:C:H2' | 1:A:370:U:O4' | 2.22                     | 0.40              |

There are no symmetry-related clashes.

## 5.3 Torsion angles [i](#)

### 5.3.1 Protein backbone [i](#)

In the following table, the Percentiles column shows the percent Ramachandran outliers of the chain as a percentile score with respect to all PDB entries followed by that with respect to all EM entries.

The Analysed column shows the number of residues for which the backbone conformation was analysed, and the total number of residues.

| Mol | Chain | Analysed      | Favoured  | Allowed | Outliers | Percentiles |
|-----|-------|---------------|-----------|---------|----------|-------------|
| 2   | B     | 114/116 (98%) | 110 (96%) | 4 (4%)  | 0        | 100 100     |

There are no Ramachandran outliers to report.

### 5.3.2 Protein sidechains [i](#)

In the following table, the Percentiles column shows the percent sidechain outliers of the chain as a percentile score with respect to all PDB entries followed by that with respect to all EM entries.

The Analysed column shows the number of residues for which the sidechain conformation was analysed, and the total number of residues.

| Mol | Chain | Analysed     | Rotameric | Outliers | Percentiles |
|-----|-------|--------------|-----------|----------|-------------|
| 2   | B     | 99/99 (100%) | 94 (95%)  | 5 (5%)   | 20 49       |

All (5) residues with a non-rotameric sidechain are listed below:

| Mol | Chain | Res | Type |
|-----|-------|-----|------|
| 2   | B     | 71  | LEU  |
| 2   | B     | 92  | MET  |
| 2   | B     | 97  | VAL  |
| 2   | B     | 105 | LEU  |
| 2   | B     | 111 | LEU  |

Sometimes sidechains can be flipped to improve hydrogen bonding and reduce clashes. All (2) such sidechains are listed below:

| Mol | Chain | Res | Type |
|-----|-------|-----|------|
| 2   | B     | 10  | ASN  |
| 2   | B     | 14  | GLN  |

### 5.3.3 RNA [i](#)

| Mol | Chain | Analysed      | Backbone Outliers | Pucker Outliers |
|-----|-------|---------------|-------------------|-----------------|
| 1   | A     | 416/417 (99%) | 164 (39%)         | 16 (3%)         |
| 3   | C     | 88/92 (95%)   | 38 (43%)          | 4 (4%)          |
| 3   | E     | 8/92 (8%)     | 4 (50%)           | 0               |
| All | All   | 512/601 (85%) | 206 (40%)         | 20 (3%)         |

All (206) RNA backbone outliers are listed below:

| Mol | Chain | Res | Type |
|-----|-------|-----|------|
| 1   | A     | 2   | U    |
| 1   | A     | 9   | U    |

*Continued on next page...*

*Continued from previous page...*

| Mol | Chain | Res | Type |
|-----|-------|-----|------|
| 1   | A     | 11  | C    |
| 1   | A     | 15  | G    |
| 1   | A     | 28  | G    |
| 1   | A     | 30  | C    |
| 1   | A     | 32  | G    |
| 1   | A     | 33  | U    |
| 1   | A     | 35  | U    |
| 1   | A     | 36  | C    |
| 1   | A     | 44  | G    |
| 1   | A     | 47  | G    |
| 1   | A     | 48  | A    |
| 1   | A     | 49  | A    |
| 1   | A     | 50  | A    |
| 1   | A     | 51  | G    |
| 1   | A     | 52  | U    |
| 1   | A     | 63  | A    |
| 1   | A     | 67  | U    |
| 1   | A     | 68  | G    |
| 1   | A     | 70  | U    |
| 1   | A     | 74  | A    |
| 1   | A     | 75  | U    |
| 1   | A     | 76  | G    |
| 1   | A     | 81  | U    |
| 1   | A     | 85  | G    |
| 1   | A     | 88  | C    |
| 1   | A     | 91  | G    |
| 1   | A     | 99  | A    |
| 1   | A     | 102 | C    |
| 1   | A     | 104 | A    |
| 1   | A     | 105 | U    |
| 1   | A     | 117 | G    |
| 1   | A     | 118 | C    |
| 1   | A     | 122 | G    |
| 1   | A     | 123 | C    |
| 1   | A     | 126 | U    |
| 1   | A     | 127 | G    |
| 1   | A     | 128 | G    |
| 1   | A     | 130 | U    |
| 1   | A     | 131 | G    |
| 1   | A     | 132 | G    |
| 1   | A     | 133 | G    |
| 1   | A     | 134 | C    |

*Continued on next page...*

*Continued from previous page...*

| Mol | Chain | Res | Type |
|-----|-------|-----|------|
| 1   | A     | 137 | A    |
| 1   | A     | 138 | C    |
| 1   | A     | 139 | G    |
| 1   | A     | 146 | A    |
| 1   | A     | 150 | A    |
| 1   | A     | 152 | C    |
| 1   | A     | 153 | C    |
| 1   | A     | 155 | A    |
| 1   | A     | 157 | G    |
| 1   | A     | 158 | U    |
| 1   | A     | 159 | C    |
| 1   | A     | 163 | C    |
| 1   | A     | 169 | U    |
| 1   | A     | 171 | U    |
| 1   | A     | 172 | G    |
| 1   | A     | 173 | G    |
| 1   | A     | 174 | U    |
| 1   | A     | 175 | U    |
| 1   | A     | 177 | G    |
| 1   | A     | 179 | U    |
| 1   | A     | 180 | U    |
| 1   | A     | 181 | A    |
| 1   | A     | 182 | C    |
| 1   | A     | 185 | U    |
| 1   | A     | 187 | A    |
| 1   | A     | 189 | A    |
| 1   | A     | 192 | G    |
| 1   | A     | 197 | A    |
| 1   | A     | 199 | U    |
| 1   | A     | 202 | C    |
| 1   | A     | 204 | G    |
| 1   | A     | 205 | A    |
| 1   | A     | 206 | G    |
| 1   | A     | 207 | C    |
| 1   | A     | 216 | A    |
| 1   | A     | 219 | C    |
| 1   | A     | 225 | A    |
| 1   | A     | 229 | G    |
| 1   | A     | 230 | G    |
| 1   | A     | 231 | A    |
| 1   | A     | 232 | A    |
| 1   | A     | 233 | C    |

*Continued on next page...*

*Continued from previous page...*

| Mol | Chain | Res | Type |
|-----|-------|-----|------|
| 1   | A     | 234 | G    |
| 1   | A     | 235 | C    |
| 1   | A     | 236 | G    |
| 1   | A     | 239 | A    |
| 1   | A     | 240 | A    |
| 1   | A     | 241 | A    |
| 1   | A     | 242 | C    |
| 1   | A     | 250 | G    |
| 1   | A     | 254 | G    |
| 1   | A     | 255 | A    |
| 1   | A     | 256 | A    |
| 1   | A     | 257 | A    |
| 1   | A     | 266 | A    |
| 1   | A     | 267 | U    |
| 1   | A     | 272 | G    |
| 1   | A     | 273 | G    |
| 1   | A     | 274 | G    |
| 1   | A     | 276 | C    |
| 1   | A     | 278 | C    |
| 1   | A     | 291 | A    |
| 1   | A     | 292 | A    |
| 1   | A     | 293 | U    |
| 1   | A     | 296 | A    |
| 1   | A     | 300 | A    |
| 1   | A     | 304 | A    |
| 1   | A     | 312 | G    |
| 1   | A     | 313 | C    |
| 1   | A     | 314 | G    |
| 1   | A     | 317 | G    |
| 1   | A     | 318 | C    |
| 1   | A     | 321 | G    |
| 1   | A     | 322 | C    |
| 1   | A     | 323 | A    |
| 1   | A     | 324 | G    |
| 1   | A     | 328 | G    |
| 1   | A     | 329 | U    |
| 1   | A     | 330 | A    |
| 1   | A     | 333 | U    |
| 1   | A     | 334 | A    |
| 1   | A     | 342 | A    |
| 1   | A     | 346 | C    |
| 1   | A     | 347 | C    |

*Continued on next page...*

*Continued from previous page...*

| Mol | Chain | Res | Type |
|-----|-------|-----|------|
| 1   | A     | 349 | G    |
| 1   | A     | 350 | A    |
| 1   | A     | 351 | G    |
| 1   | A     | 353 | A    |
| 1   | A     | 358 | G    |
| 1   | A     | 359 | C    |
| 1   | A     | 361 | C    |
| 1   | A     | 362 | A    |
| 1   | A     | 363 | A    |
| 1   | A     | 364 | A    |
| 1   | A     | 365 | G    |
| 1   | A     | 366 | C    |
| 1   | A     | 367 | C    |
| 1   | A     | 368 | G    |
| 1   | A     | 369 | C    |
| 1   | A     | 372 | G    |
| 1   | A     | 373 | C    |
| 1   | A     | 375 | G    |
| 1   | A     | 376 | U    |
| 1   | A     | 379 | G    |
| 1   | A     | 380 | A    |
| 1   | A     | 381 | A    |
| 1   | A     | 382 | G    |
| 1   | A     | 383 | G    |
| 1   | A     | 384 | U    |
| 1   | A     | 389 | A    |
| 1   | A     | 391 | C    |
| 1   | A     | 392 | A    |
| 1   | A     | 400 | U    |
| 1   | A     | 401 | A    |
| 1   | A     | 402 | G    |
| 1   | A     | 403 | A    |
| 1   | A     | 406 | A    |
| 1   | A     | 407 | U    |
| 1   | A     | 408 | G    |
| 1   | A     | 410 | U    |
| 3   | C     | -10 | U    |
| 3   | C     | -8  | U    |
| 3   | C     | -7  | U    |
| 3   | C     | -5  | C    |
| 3   | C     | -4  | C    |
| 3   | C     | -3  | U    |

*Continued on next page...*

Continued from previous page...

| Mol | Chain | Res | Type |
|-----|-------|-----|------|
| 3   | C     | -2  | U    |
| 3   | C     | -1  | U    |
| 3   | C     | 8   | U    |
| 3   | C     | 9   | A    |
| 3   | C     | 10  | G    |
| 3   | C     | 11  | U    |
| 3   | C     | 12  | U    |
| 3   | C     | 13  | C    |
| 3   | C     | 15  | G    |
| 3   | C     | 17  | G    |
| 3   | C     | 18  | G    |
| 3   | C     | 19  | U    |
| 3   | C     | 20  | A    |
| 3   | C     | 21  | G    |
| 3   | C     | 23  | A    |
| 3   | C     | 26  | C    |
| 3   | C     | 29  | C    |
| 3   | C     | 33  | G    |
| 3   | C     | 37  | A    |
| 3   | C     | 40  | U    |
| 3   | C     | 44  | G    |
| 3   | C     | 45  | G    |
| 3   | C     | 46  | U    |
| 3   | C     | 47  | C    |
| 3   | C     | 48  | G    |
| 3   | C     | 52  | G    |
| 3   | C     | 58  | G    |
| 3   | C     | 59  | U    |
| 3   | C     | 60  | C    |
| 3   | C     | 70  | G    |
| 3   | C     | 72  | U    |
| 3   | C     | 75  | A    |
| 3   | E     | -11 | A    |
| 3   | E     | -10 | U    |
| 3   | E     | -9  | U    |
| 3   | E     | -7  | U    |

All (20) RNA pucker outliers are listed below:

| Mol | Chain | Res | Type |
|-----|-------|-----|------|
| 1   | A     | 50  | A    |
| 1   | A     | 67  | U    |

Continued on next page...

Continued from previous page...

| Mol | Chain | Res | Type |
|-----|-------|-----|------|
| 1   | A     | 75  | U    |
| 1   | A     | 122 | G    |
| 1   | A     | 126 | U    |
| 1   | A     | 137 | A    |
| 1   | A     | 176 | C    |
| 1   | A     | 201 | A    |
| 1   | A     | 204 | G    |
| 1   | A     | 232 | A    |
| 1   | A     | 235 | C    |
| 1   | A     | 240 | A    |
| 1   | A     | 292 | A    |
| 1   | A     | 349 | G    |
| 1   | A     | 363 | A    |
| 1   | A     | 365 | G    |
| 3   | C     | 7   | G    |
| 3   | C     | 46  | U    |
| 3   | C     | 59  | U    |
| 3   | C     | 69  | C    |

#### 5.4 Non-standard residues in protein, DNA, RNA chains [i](#)

There are no non-standard protein/DNA/RNA residues in this entry.

#### 5.5 Carbohydrates [i](#)

There are no oligosaccharides in this entry.

#### 5.6 Ligand geometry [i](#)

Of 29 ligands modelled in this entry, 29 are monoatomic - leaving 0 for Mogul analysis.

There are no bond length outliers.

There are no bond angle outliers.

There are no chirality outliers.

There are no torsion outliers.

There are no ring outliers.

No monomer is involved in short contacts.

## 5.7 Other polymers [i](#)

There are no such residues in this entry.

## 5.8 Polymer linkage issues [i](#)

There are no chain breaks in this entry.

For Manuscript Review

## 6 Map visualisation [i](#)

This section contains visualisations of the EMDB entry EMD-70943. These allow visual inspection of the internal detail of the map and identification of artifacts.

Images derived from a raw map, generated by summing the deposited half-maps, are presented below the corresponding image components of the primary map to allow further visual inspection and comparison with those of the primary map.

### 6.1 Orthogonal projections [i](#)

#### 6.1.1 Primary map

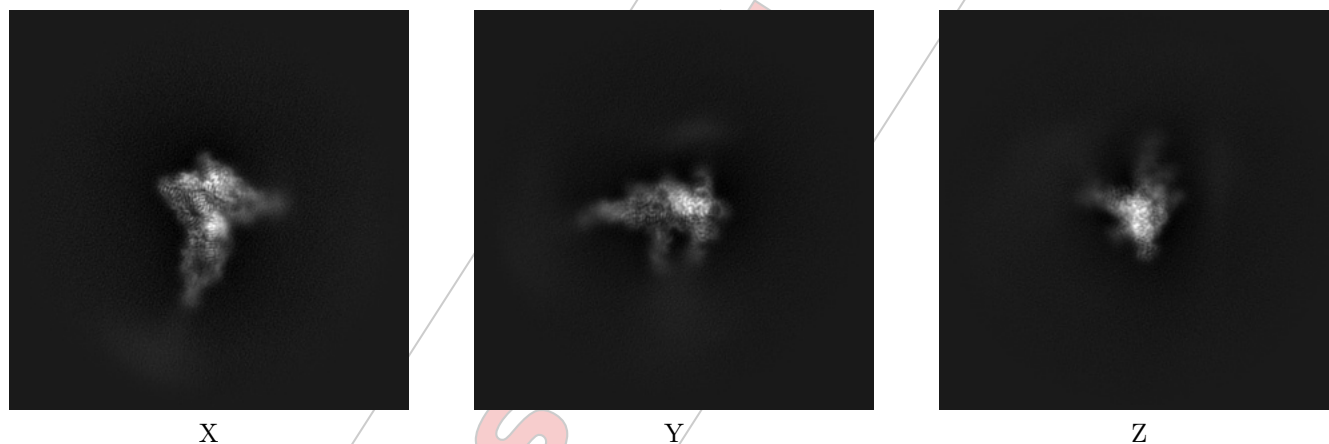

#### 6.1.2 Raw map

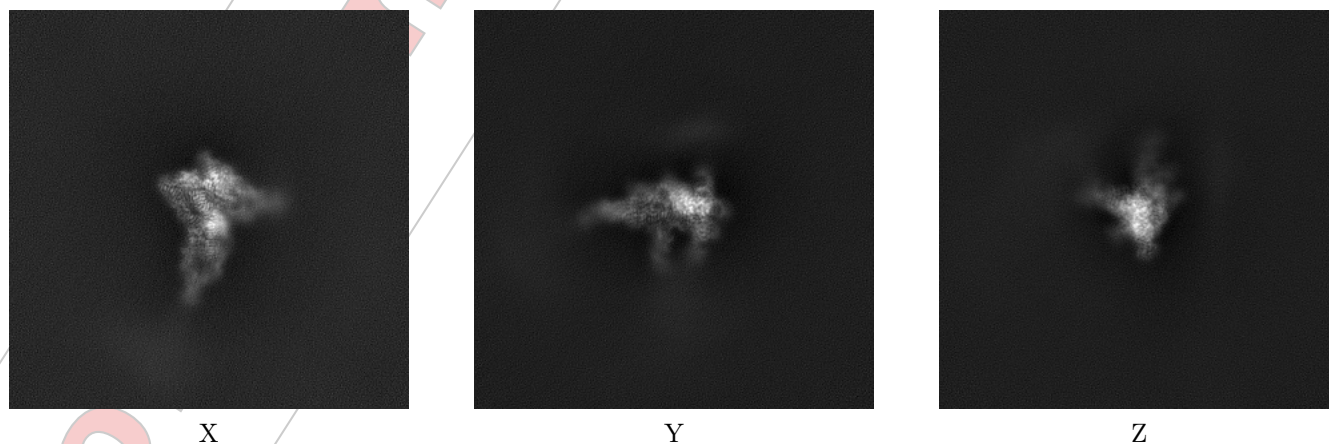

The images above show the map projected in three orthogonal directions.

## 6.2 Central slices [i](#)

### 6.2.1 Primary map

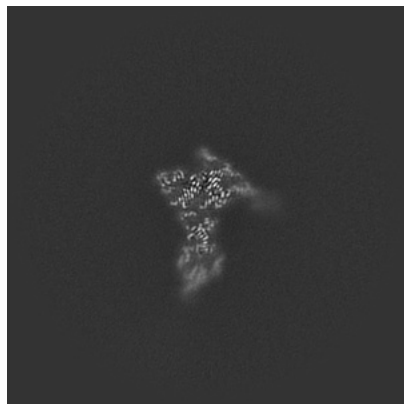

X Index: 200

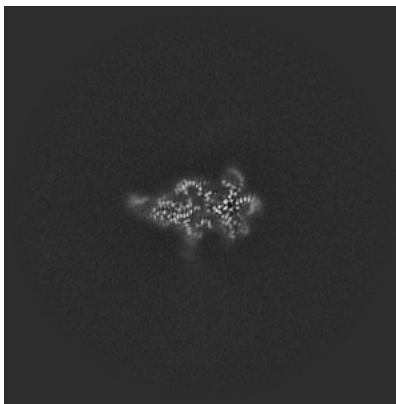

Y Index: 200

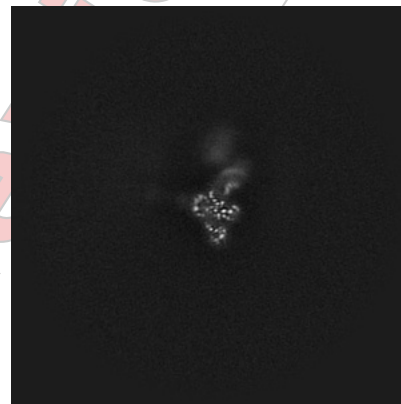

Z Index: 200

### 6.2.2 Raw map

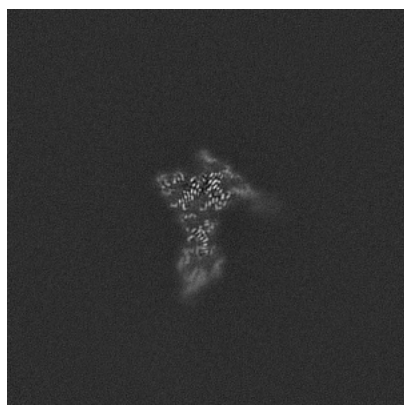

X Index: 200

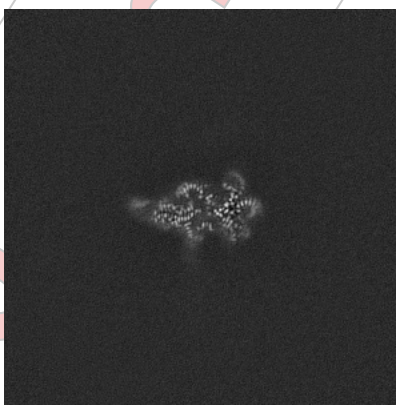

Y Index: 200

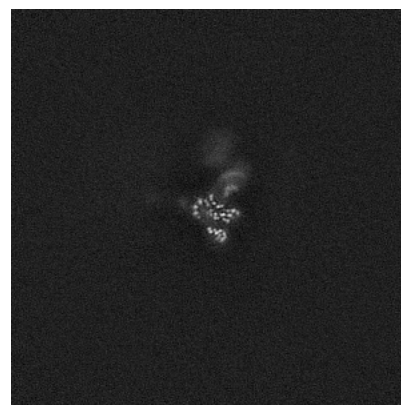

Z Index: 200

The images above show central slices of the map in three orthogonal directions.

## 6.3 Largest variance slices [i](#)

### 6.3.1 Primary map

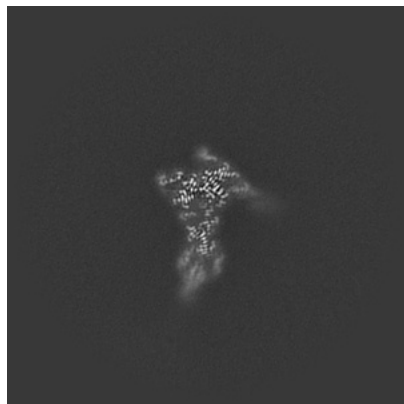

X Index: 198

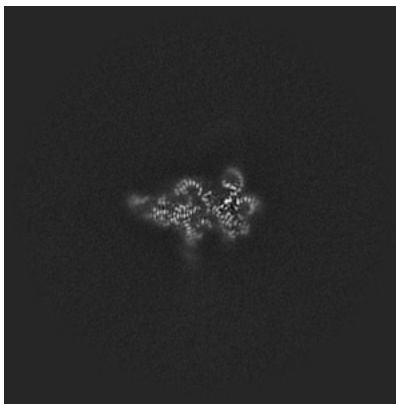

Y Index: 201

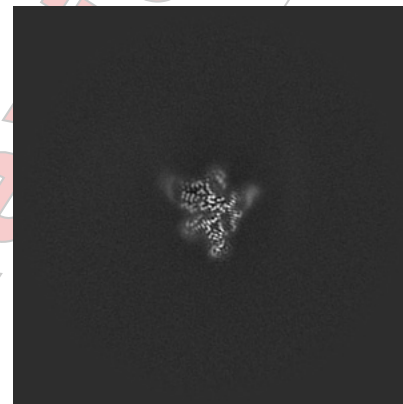

Z Index: 227

### 6.3.2 Raw map

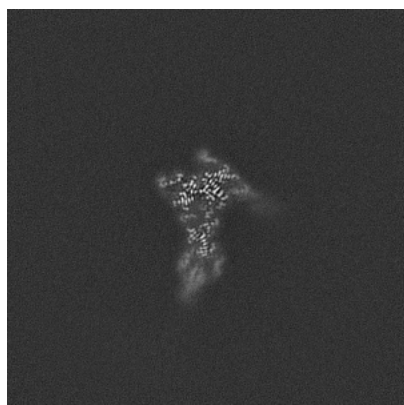

X Index: 198

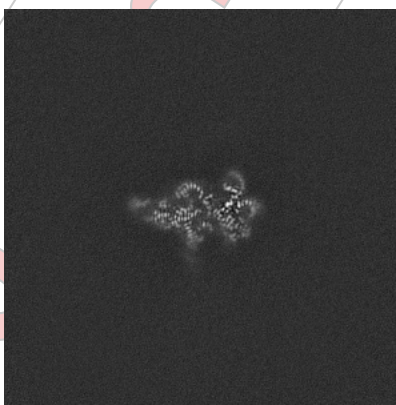

Y Index: 201

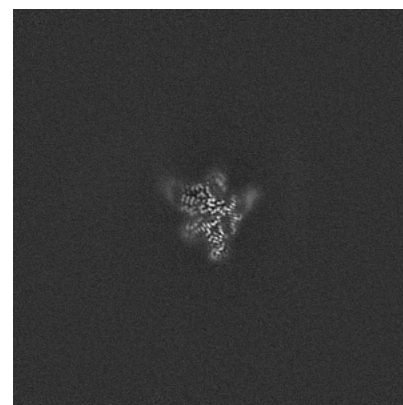

Z Index: 228

The images above show the largest variance slices of the map in three orthogonal directions.

## 6.4 Orthogonal standard-deviation projections (False-color) [i](#)

### 6.4.1 Primary map

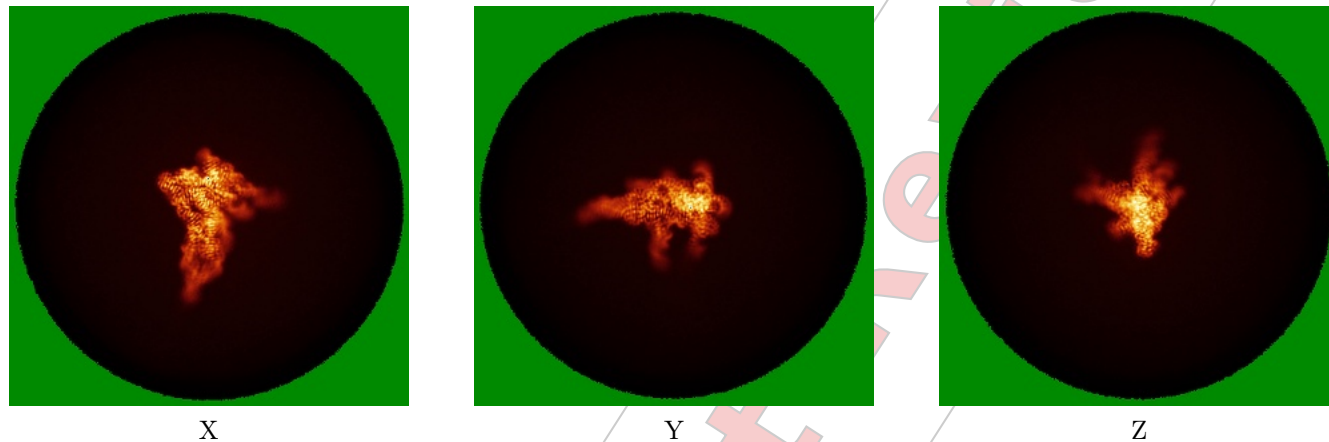

### 6.4.2 Raw map

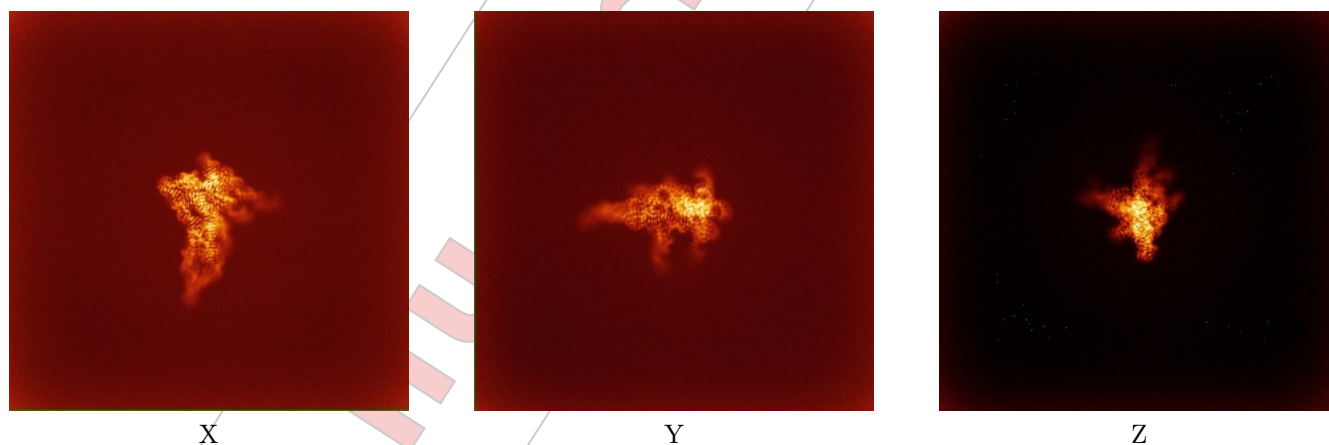

The images above show the map standard deviation projections with false color in three orthogonal directions. Minimum values are shown in green, max in blue, and dark to light orange shades represent small to large values respectively.

## 6.5 Orthogonal surface views [i](#)

### 6.5.1 Primary map

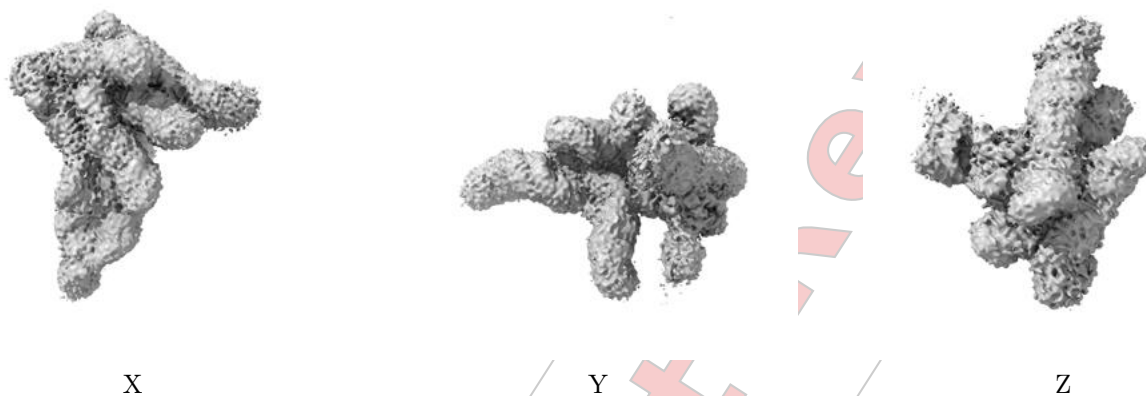

The images above show the 3D surface view of the map at the recommended contour level 0.026. These images, in conjunction with the slice images, may facilitate assessment of whether an appropriate contour level has been provided.

### 6.5.2 Raw map

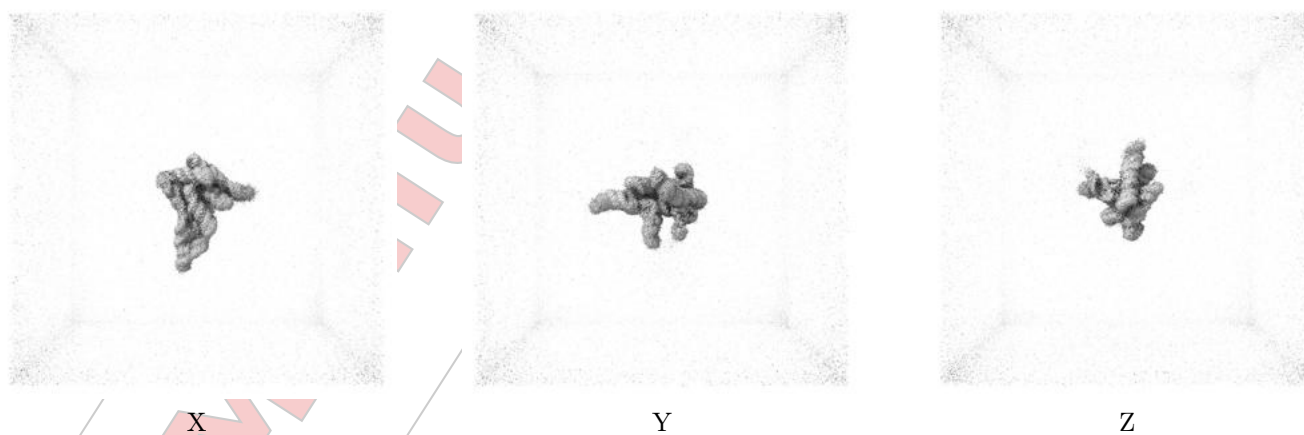

These images show the 3D surface of the raw map. The raw map's contour level was selected so that its surface encloses the same volume as the primary map does at its recommended contour level.

## 6.6 Mask visualisation [i](#)

This section was not generated. No masks/segmentation were deposited.

## 7 Map analysis [i](#)

This section contains the results of statistical analysis of the map.

### 7.1 Map-value distribution [i](#)

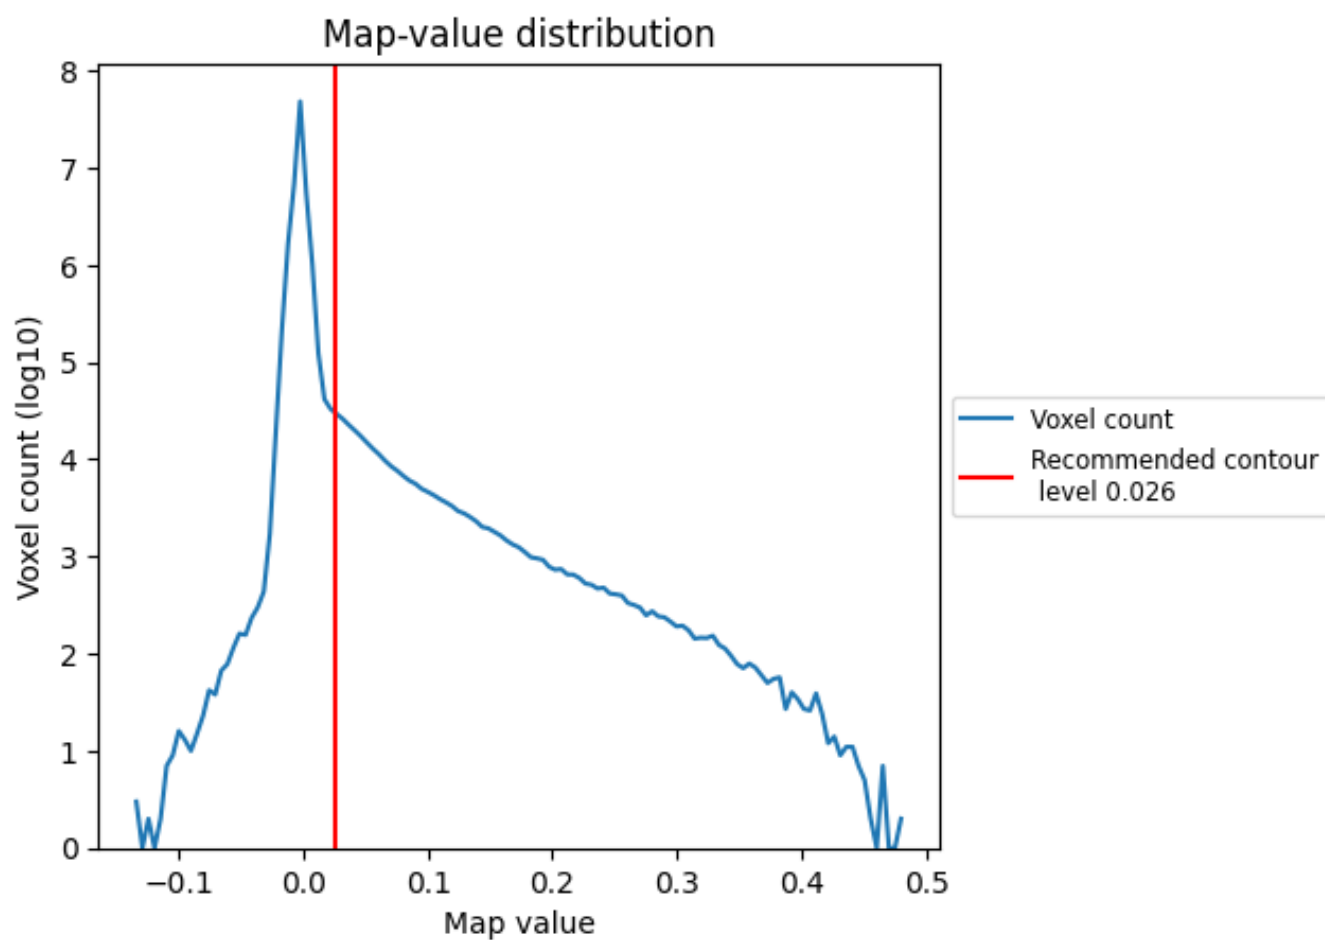

The map-value distribution is plotted in 128 intervals along the x-axis. The y-axis is logarithmic. A spike in this graph at zero usually indicates that the volume has been masked.

## 7.2 Volume estimate [i](#)

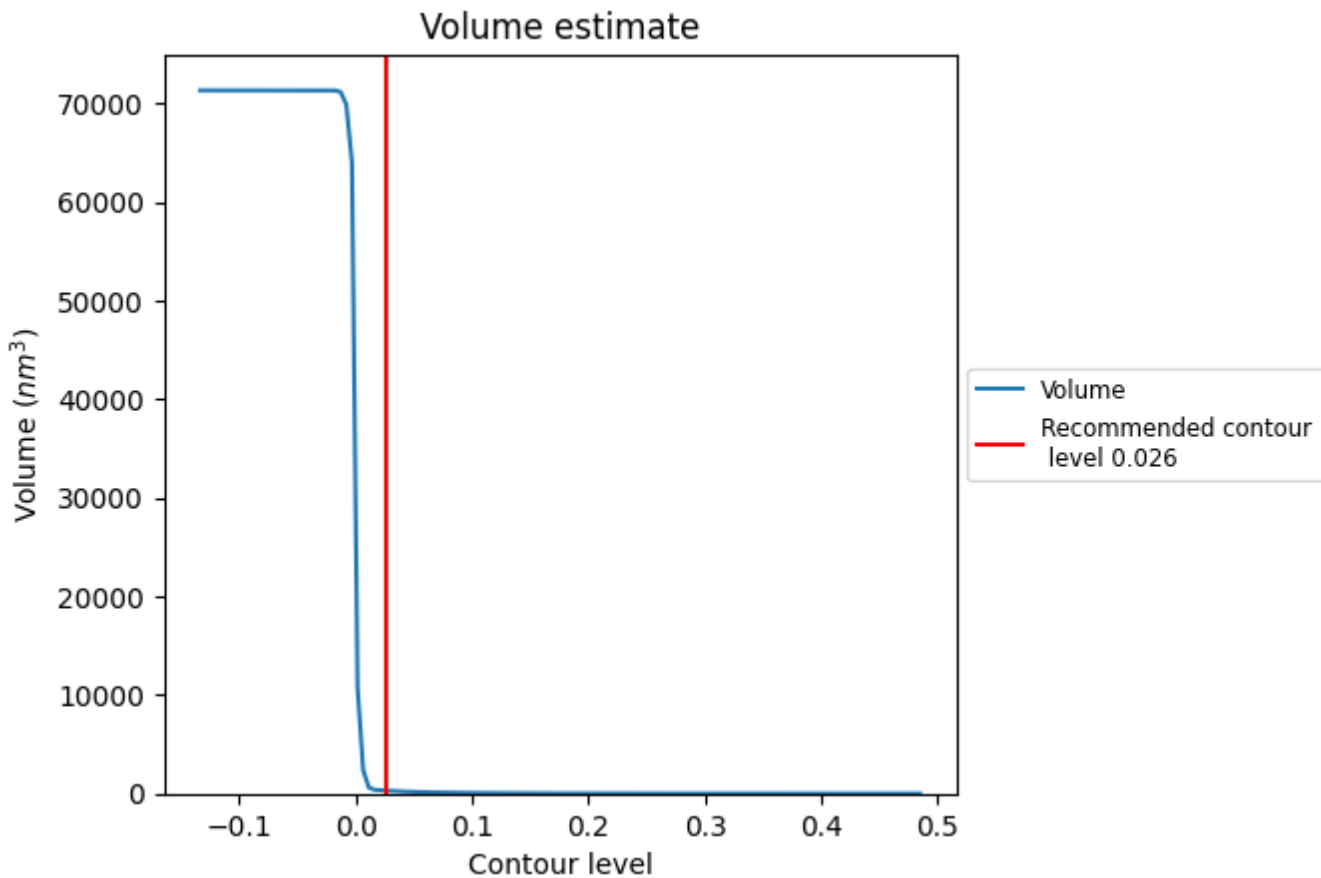

The volume at the recommended contour level is 297  $\text{nm}^3$ ; this corresponds to an approximate mass of 269 kDa.

The volume estimate graph shows how the enclosed volume varies with the contour level. The recommended contour level is shown as a vertical line and the intersection between the line and the curve gives the volume of the enclosed surface at the given level.

7.3 Rotationally averaged power spectrum 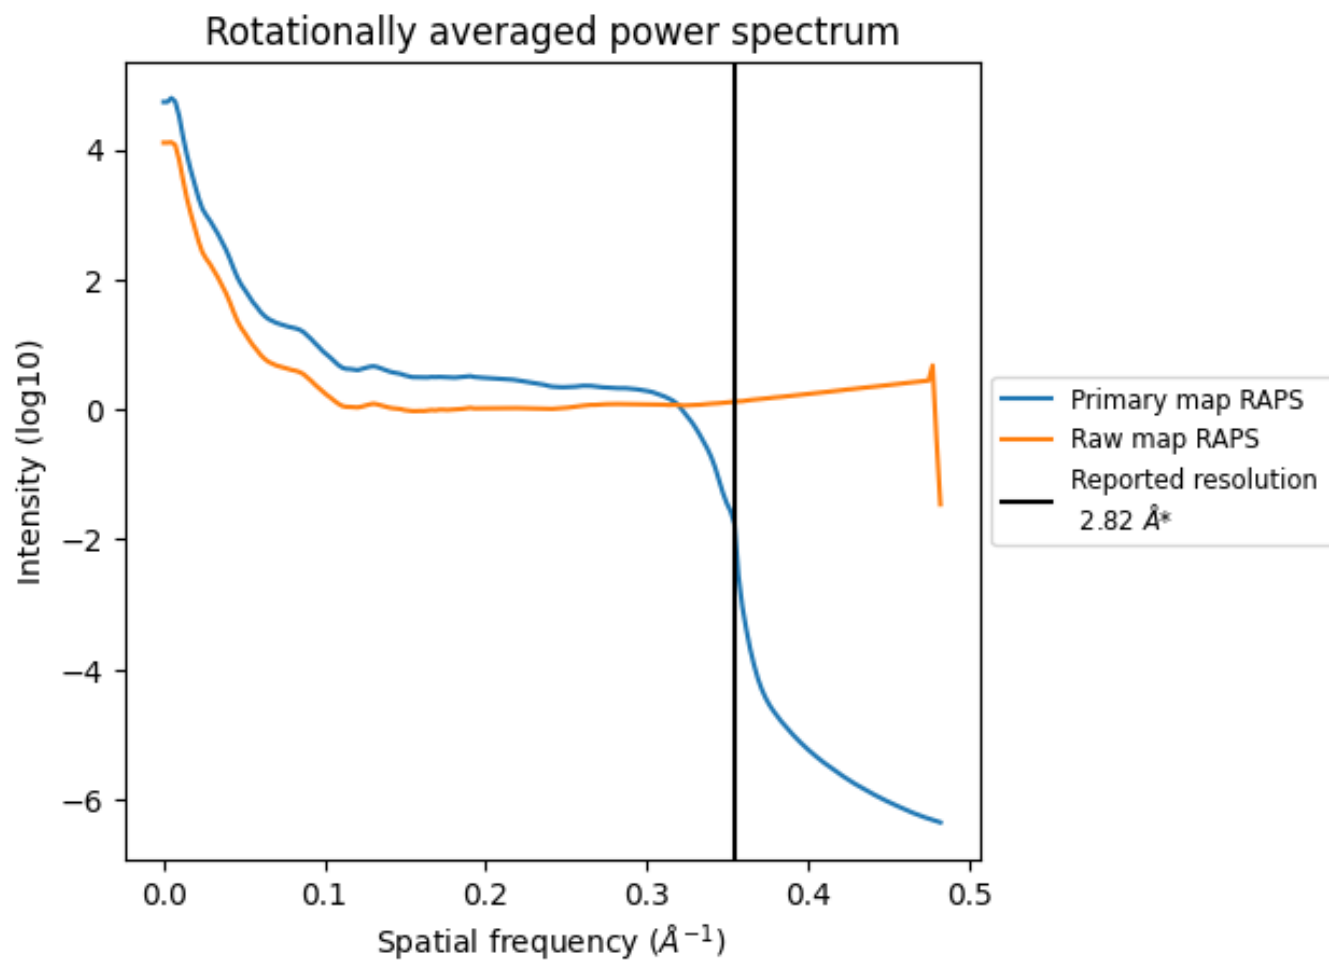

\*Reported resolution corresponds to spatial frequency of 0.355 Å<sup>-1</sup>

For Manuscript

## 8 Fourier-Shell correlation [\(i\)](#)

Fourier-Shell Correlation (FSC) is the most commonly used method to estimate the resolution of single-particle and subtomogram-averaged maps. The shape of the curve depends on the imposed symmetry, mask and whether or not the two 3D reconstructions used were processed from a common reference. The reported resolution is shown as a black line. A curve is displayed for the half-bit criterion in addition to lines showing the 0.143 gold standard cut-off and 0.5 cut-off.

### 8.1 FSC [\(i\)](#)

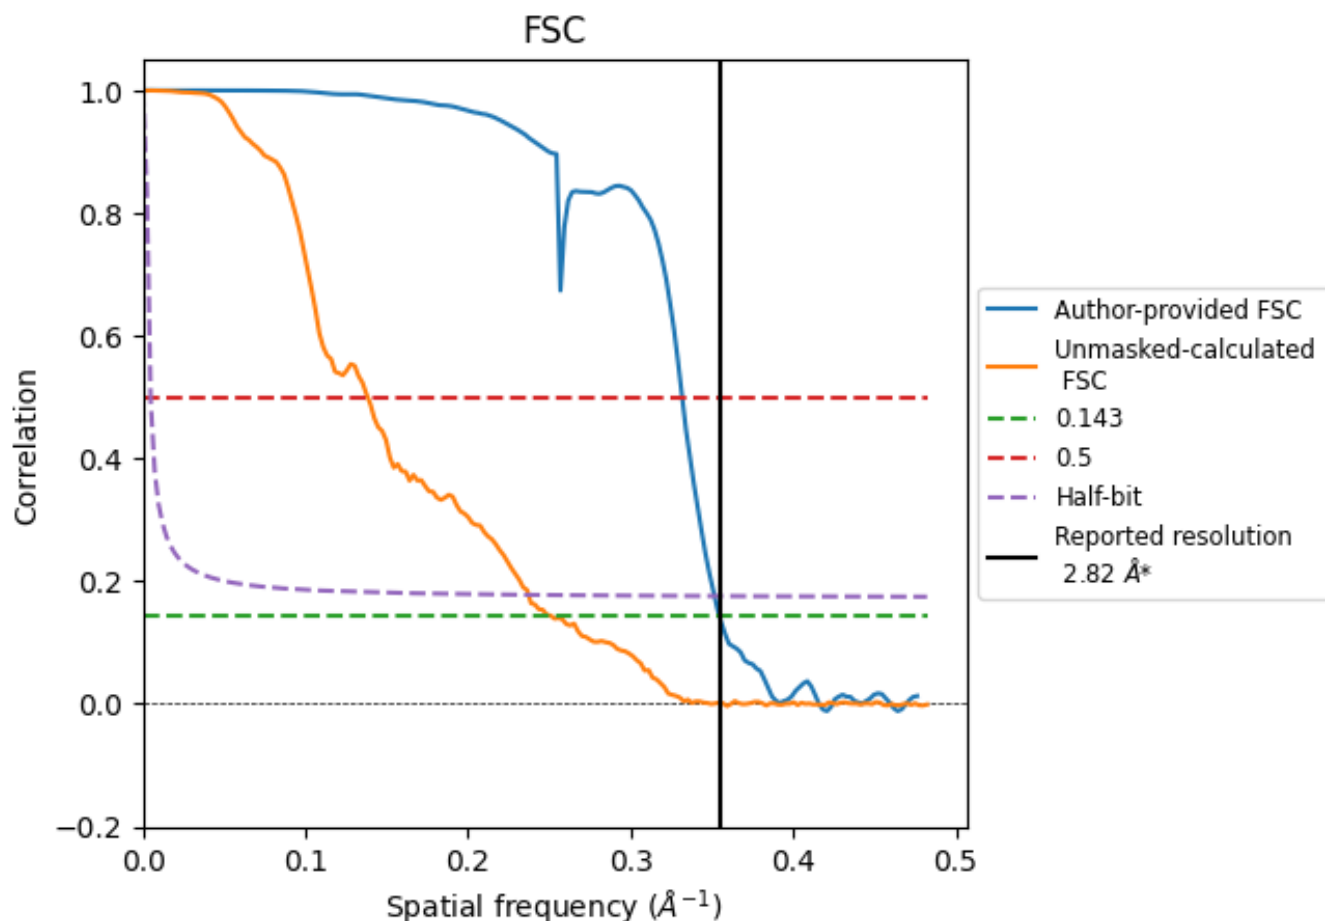

\*Reported resolution corresponds to spatial frequency of 0.355 Å<sup>-1</sup>

## 8.2 Resolution estimates [i](#)

| Resolution estimate (Å)   | Estimation criterion (FSC cut-off) |      |          |
|---------------------------|------------------------------------|------|----------|
|                           | 0.143                              | 0.5  | Half-bit |
| Reported by author        | 2.82                               | -    | -        |
| Author-provided FSC curve | 2.82                               | 3.01 | 2.84     |
| Unmasked-calculated*      | 3.98                               | 7.24 | 4.22     |

\*Resolution estimate based on FSC curve calculated by comparison of deposited half-maps. The value from deposited half-maps intersecting FSC 0.143 CUT-OFF 3.98 differs from the reported value 2.82 by more than 10 %

## 9 Map-model fit [i](#)

This section contains information regarding the fit between EMDB map EMD-70943 and PDB model 9OWT. Per-residue inclusion information can be found in section 3 on page 4.

### 9.1 Map-model overlay [i](#)

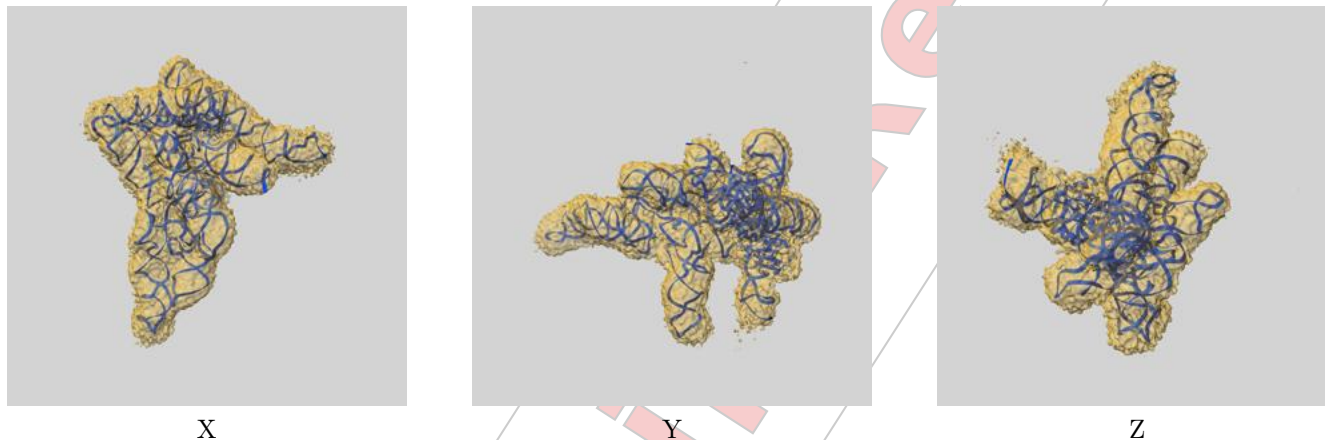

The images above show the 3D surface view of the map at the recommended contour level 0.026 at 50% transparency in yellow overlaid with a ribbon representation of the model coloured in blue. These images allow for the visual assessment of the quality of fit between the atomic model and the map.

## 9.2 Q-score mapped to coordinate model [\(i\)](#)

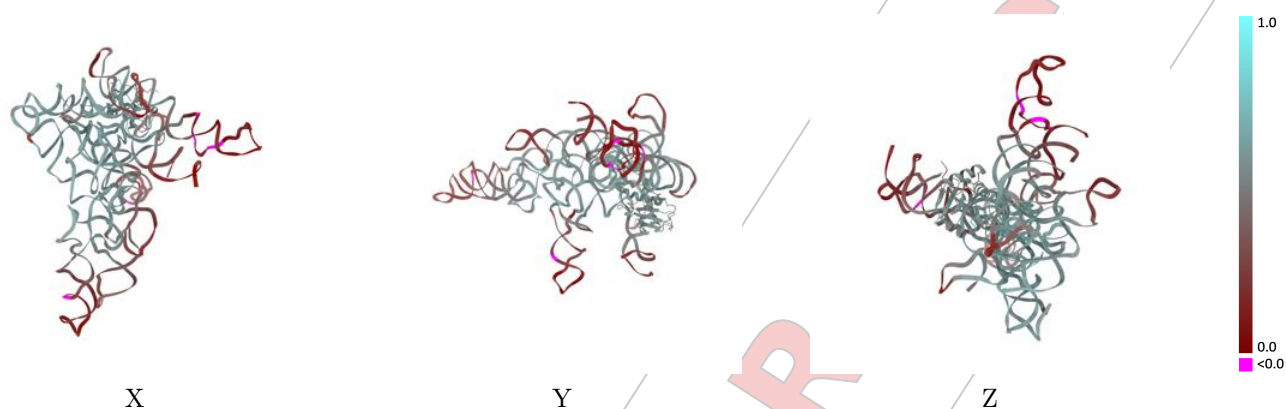

The images above show the model with each residue coloured according to its Q-score. This shows their resolvability in the map with higher Q-score values reflecting better resolvability. Please note: Q-score is calculating the resolvability of atoms, and thus high values are only expected at resolutions at which atoms can be resolved. Low Q-score values may therefore be expected for many entries.

## 9.3 Atom inclusion mapped to coordinate model [\(i\)](#)

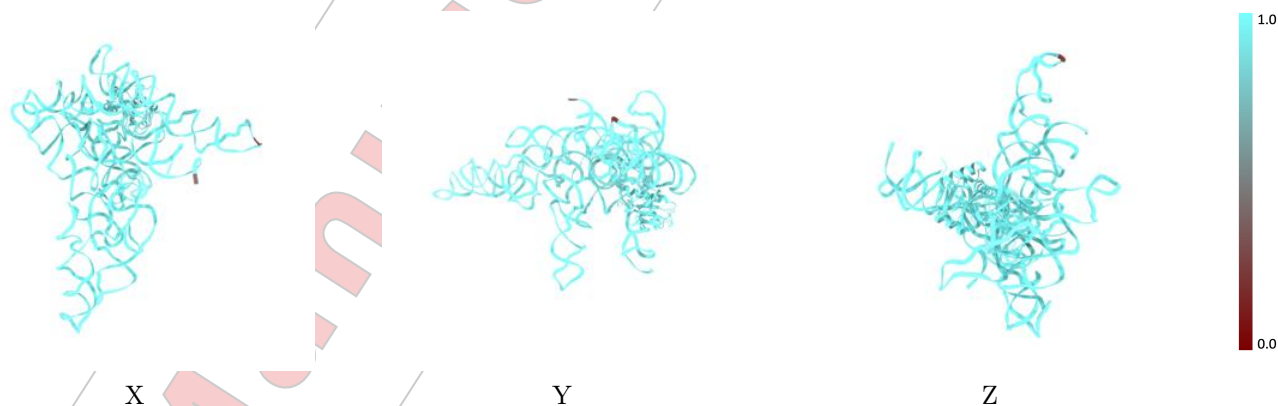

The images above show the model with each residue coloured according to its atom inclusion. This shows to what extent they are inside the map at the recommended contour level (0.026).

## 9.4 Atom inclusion [i](#)

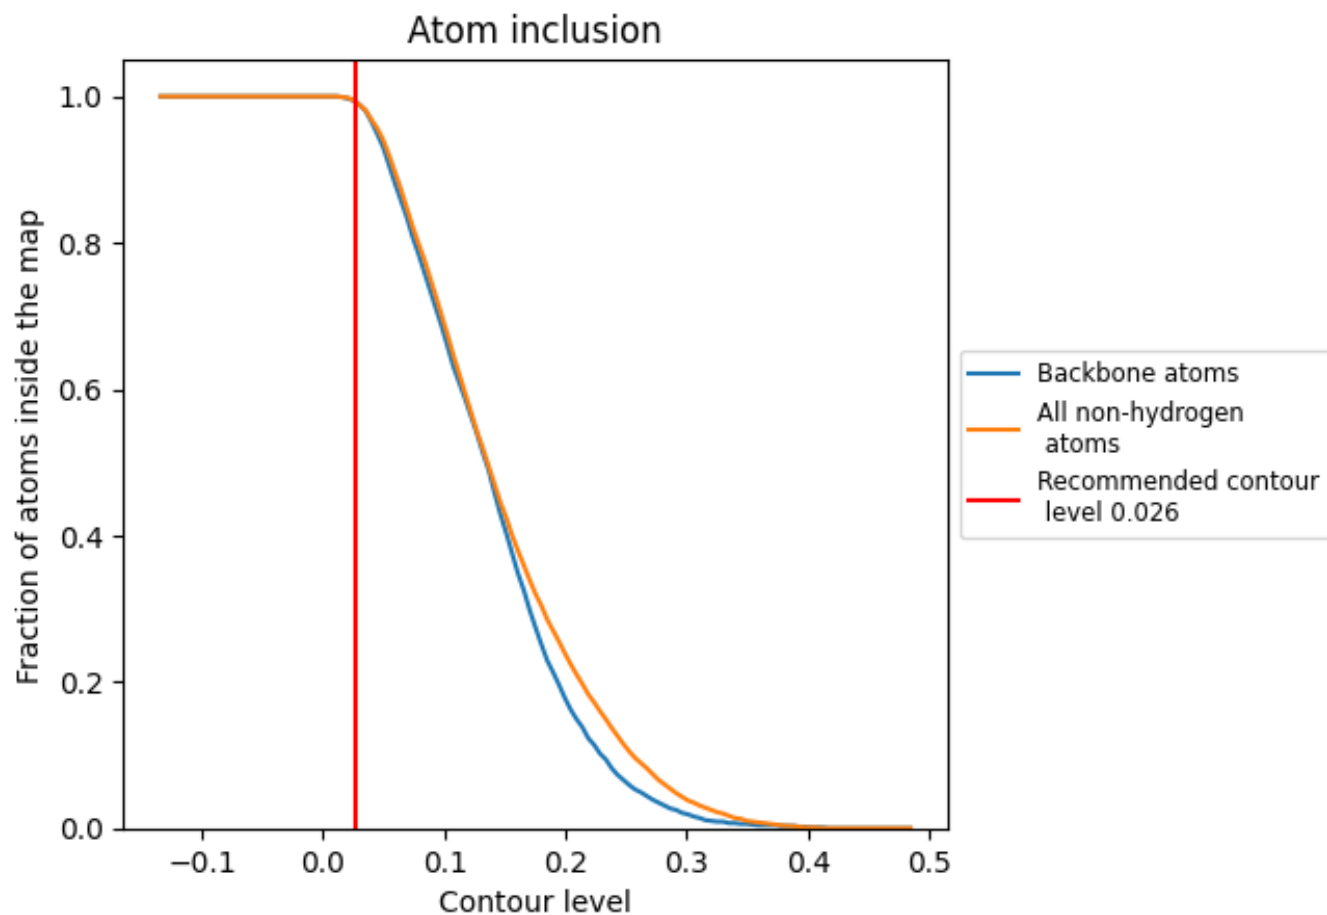

At the recommended contour level, 99% of all backbone atoms, 99% of all non-hydrogen atoms, are inside the map.

## 9.5 Map-model fit summary

The table lists the average atom inclusion at the recommended contour level (0.026) and Q-score for the entire model and for each chain.

| Chain | Atom inclusion                                                                           | Q-score                                                                                  |
|-------|------------------------------------------------------------------------------------------|------------------------------------------------------------------------------------------|
| All   |  0.9940 |  0.4460 |
| A     |  0.9950 |  0.4450 |
| B     |  0.9940 |  0.5350 |
| C     |  0.9970 |  0.4210 |
| E     |  0.9470 |  0.2980 |





# Full wwPDB EM Validation Report ⓘ

Jun 4, 2025 – 04:10 PM EDT

PDB ID : 9OWU / pdb\_00009owu  
EMDB ID : EMD-70944  
Title : Structure of Geobacillus stearothermophilus RNase P holoenzyme in complex with precursor tRNA in 1 mM Ca<sup>2+</sup>  
Deposited on : 2025-06-02  
Resolution : 2.93 Å (reported)  
Based on initial model : 2A64

**This wwPDB validation report is for manuscript review**

This is a Full wwPDB EM Validation Report.

This report is produced by the wwPDB biocuration pipeline after annotation of the structure.

We welcome your comments at [validation@mail.wwpdb.org](mailto:validation@mail.wwpdb.org)

A user guide is available at

<https://www.wwpdb.org/validation/2017/EMValidationReportHelp>

with specific help available everywhere you see the ⓘ symbol.

The types of validation reports are described at

<http://www.wwpdb.org/validation/2017/FAQs#types>.

---

The following versions of software and data (see [references ⓘ](#)) were used in the production of this report:

EMDB validation analysis : 0.0.1.dev118  
MolProbity : 4-5-2 with Phenix2.0rc1  
Percentile statistics : 20231227.v01 (using entries in the PDB archive December 27th 2023)  
MapQ : 1.9.13  
Ideal geometry (proteins) : Engh & Huber (2001)  
Ideal geometry (DNA, RNA) : Parkinson et al. (1996)  
Validation Pipeline (wwPDB-VP) : 2.43.1

# 1 Overall quality at a glance i

The following experimental techniques were used to determine the structure:  
*ELECTRON MICROSCOPY*

The reported resolution of this entry is 2.93 Å.

Percentile scores (ranging between 0-100) for global validation metrics of the entry are shown in the following graphic. The table shows the number of entries on which the scores are based.

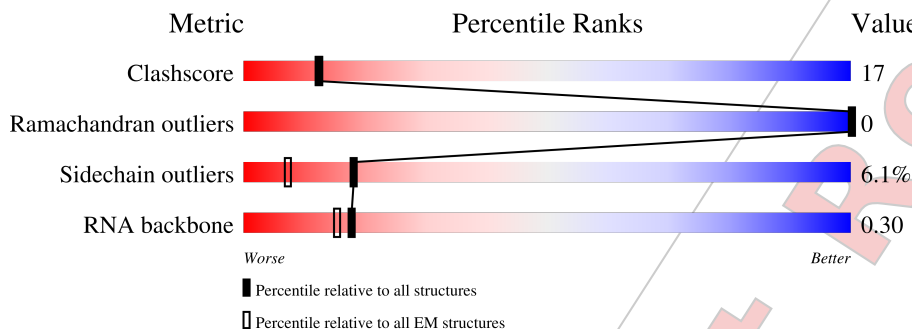

| Metric                | Whole archive (#Entries) | EM structures (#Entries) |
|-----------------------|--------------------------|--------------------------|
| Clashscore            | 210492                   | 15764                    |
| Ramachandran outliers | 207382                   | 16835                    |
| Sidechain outliers    | 206894                   | 16415                    |
| RNA backbone          | 6643                     | 2191                     |

The table below summarises the geometric issues observed across the polymeric chains and their fit to the map. The red, orange, yellow and green segments of the bar indicate the fraction of residues that contain outliers for  $\geq 3$ , 2, 1 and 0 types of geometric quality criteria respectively. A grey segment represents the fraction of residues that are not modelled. The numeric value for each fraction is indicated below the corresponding segment, with a dot representing fractions  $\leq 5\%$ . The upper red bar (where present) indicates the fraction of residues that have poor fit to the EM map (all-atom inclusion  $< 40\%$ ). The numeric value is given above the bar.

| Mol | Chain | Length | Quality of chain |
|-----|-------|--------|------------------|
| 1   | A     | 417    |                  |
| 2   | B     | 116    |                  |
| 3   | C     | 92     |                  |
| 3   | E     | 92     |                  |

## 2 Entry composition i

There are 4 unique types of molecules in this entry. The entry contains 12011 atoms, of which 0 are hydrogens and 0 are deuteriums.

In the tables below, the AltConf column contains the number of residues with at least one atom in alternate conformation and the Trace column contains the number of residues modelled with at most 2 atoms.

- Molecule 1 is a RNA chain called RNase P RNA (417-MER).

| Mol | Chain | Residues | Atoms |      |      |      |     | AltConf | Trace |
|-----|-------|----------|-------|------|------|------|-----|---------|-------|
|     |       |          | Total | C    | N    | O    | P   |         |       |
| 1   | A     | 417      | 8962  | 3996 | 1660 | 2889 | 417 | 0       | 0     |

- Molecule 2 is a protein called Ribonuclease P protein component.

| Mol | Chain | Residues | Atoms |     |     |     |   | AltConf | Trace |
|-----|-------|----------|-------|-----|-----|-----|---|---------|-------|
|     |       |          | Total | C   | N   | O   | S |         |       |
| 2   | B     | 116      | 947   | 608 | 174 | 162 | 3 | 0       | 0     |

There are 2 discrepancies between the modelled and reference sequences:

| Chain | Residue | Modelled | Actual | Comment        | Reference      |
|-------|---------|----------|--------|----------------|----------------|
| B     | 0       | GLY      | -      | expression tag | UNP A0A150N245 |
| B     | 64      | ILE      | VAL    | conflict       | UNP A0A150N245 |

- Molecule 3 is a RNA chain called precursor tRNA (89-MER).

| Mol | Chain | Residues | Atoms |     |     |     |    | AltConf | Trace |
|-----|-------|----------|-------|-----|-----|-----|----|---------|-------|
|     |       |          | Total | C   | N   | O   | P  |         |       |
| 3   | C     | 89       | 1889  | 842 | 326 | 632 | 89 | 0       | 0     |
| 3   | E     | 9        | 188   | 84  | 29  | 66  | 9  | 0       | 0     |

- Molecule 4 is CALCIUM ION (CCD ID: CA) (formula: Ca) (labeled as "Ligand of Interest" by depositor).

| Mol | Chain | Residues | Atoms |    | AltConf |
|-----|-------|----------|-------|----|---------|
| 4   | A     | 25       | Total | Ca | 0       |
|     |       |          | 25    | 25 |         |

### 3 Residue-property plots

These plots are drawn for all protein, RNA, DNA and oligosaccharide chains in the entry. The first graphic for a chain summarises the proportions of the various outlier classes displayed in the second graphic. The second graphic shows the sequence view annotated by issues in geometry and atom inclusion in map density. Residues are color-coded according to the number of geometric quality criteria for which they contain at least one outlier: green = 0, yellow = 1, orange = 2 and red = 3 or more. A red diamond above a residue indicates a poor fit to the EM map for this residue (all-atom inclusion < 40%). Stretches of 2 or more consecutive residues without any outlier are shown as a green connector. Residues present in the sample, but not in the model, are shown in grey.

- Molecule 1: RNase P RNA (417-MER)

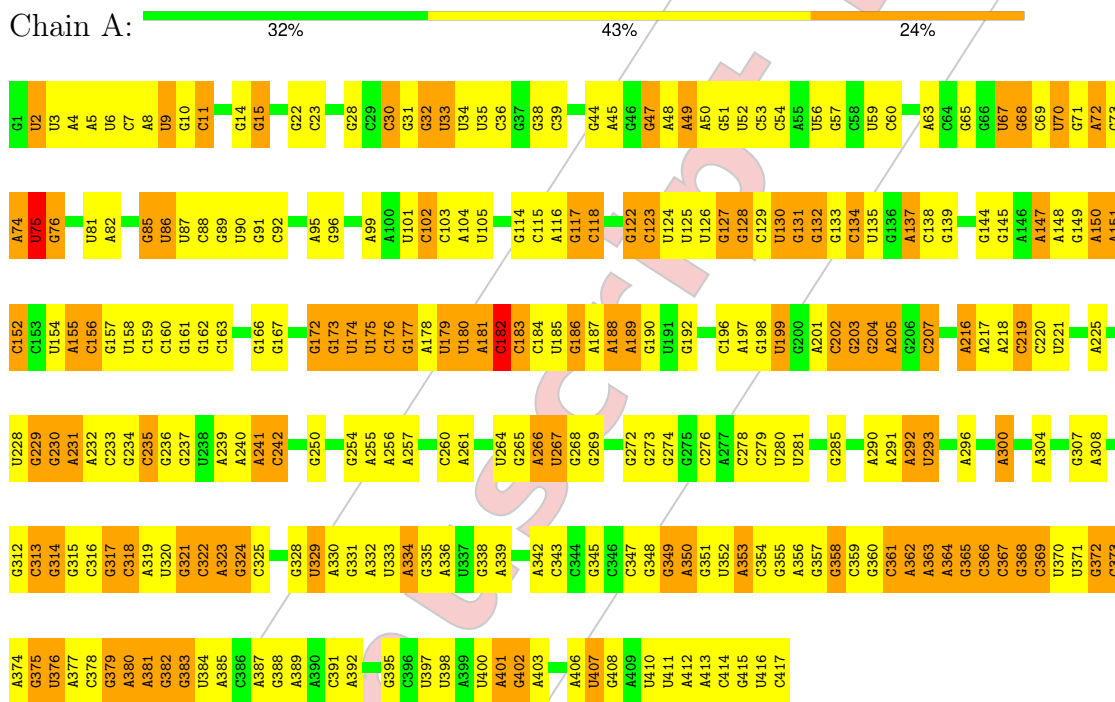

- Molecule 2: Ribonuclease P protein component

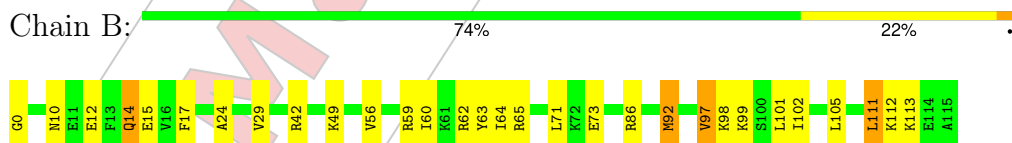

- Molecule 3: precursor tRNA (89-MER)

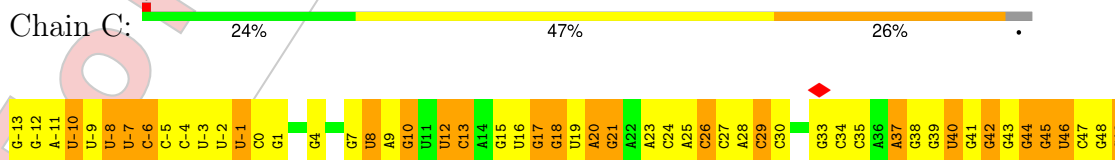

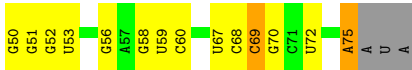

- Molecule 3: precursor tRNA (89-MER)

Chain E: . . . 90%

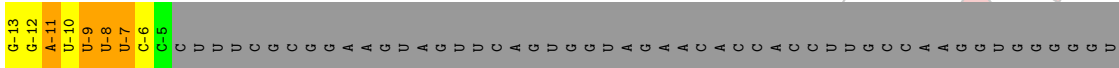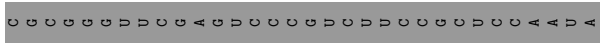

For Manuscript Review

## 4 Experimental information i

| Property                             | Value                                   | Source    |
|--------------------------------------|-----------------------------------------|-----------|
| EM reconstruction method             | SINGLE PARTICLE                         | Depositor |
| Imposed symmetry                     | POINT, Not provided                     |           |
| Number of particles used             | 229735                                  | Depositor |
| Resolution determination method      | FSC 0.143 CUT-OFF                       | Depositor |
| CTF correction method                | PHASE FLIPPING AND AMPLITUDE CORRECTION | Depositor |
| Microscope                           | FEI TALOS ARCTICA                       | Depositor |
| Voltage (kV)                         | 200                                     | Depositor |
| Electron dose ( $e^-/\text{\AA}^2$ ) | 57                                      | Depositor |
| Minimum defocus (nm)                 | 500                                     | Depositor |
| Maximum defocus (nm)                 | 1500                                    | Depositor |
| Magnification                        | Not provided                            |           |
| Image detector                       | GATAN K3 BIOQUANTUM (6k x 4k)           | Depositor |
| Maximum map value                    | 0.439                                   | Depositor |
| Minimum map value                    | -0.121                                  | Depositor |
| Average map value                    | 0.000                                   | Depositor |
| Map value standard deviation         | 0.006                                   | Depositor |
| Recommended contour level            | 0.014                                   | Depositor |
| Map size (Å)                         | 414.72, 414.72, 414.72                  | wwPDB     |
| Map dimensions                       | 400, 400, 400                           | wwPDB     |
| Map angles (°)                       | 90.0, 90.0, 90.0                        | wwPDB     |
| Pixel spacing (Å)                    | 1.0368, 1.0368, 1.0368                  | Depositor |

## 5 Model quality [i](#)

### 5.1 Standard geometry [i](#)

Bond lengths and bond angles in the following residue types are not validated in this section: CA

The Z score for a bond length (or angle) is the number of standard deviations the observed value is removed from the expected value. A bond length (or angle) with  $|Z| > 5$  is considered an outlier worth inspection. RMSZ is the root-mean-square of all Z scores of the bond lengths (or angles).

| Mol | Chain | Bond lengths |         | Bond angles |                 |
|-----|-------|--------------|---------|-------------|-----------------|
|     |       | RMSZ         | # Z  >5 | RMSZ        | # Z  >5         |
| 1   | A     | 0.54         | 0/10038 | 0.87        | 7/15661 (0.0%)  |
| 2   | B     | 0.45         | 0/962   | 0.66        | 0/1281          |
| 3   | C     | 0.59         | 0/2107  | 0.91        | 3/3281 (0.1%)   |
| 3   | E     | 0.58         | 0/208   | 0.87        | 0/321           |
| All | All   | 0.54         | 0/13315 | 0.87        | 10/20544 (0.0%) |

Chiral center outliers are detected by calculating the chiral volume of a chiral center and verifying if the center is modelled as a planar moiety or with the opposite hand. A planarity outlier is detected by checking planarity of atoms in a peptide group, atoms in a mainchain group or atoms of a sidechain that are expected to be planar.

| Mol | Chain | #Chirality outliers | #Planarity outliers |
|-----|-------|---------------------|---------------------|
| 2   | B     | 0                   | 1                   |

There are no bond length outliers.

All (10) bond angle outliers are listed below:

| Mol | Chain | Res | Type | Atoms       | Z     | Observed(°) | Ideal(°) |
|-----|-------|-----|------|-------------|-------|-------------|----------|
| 1   | A     | 75  | U    | C2'-C3'-O3' | 6.57  | 119.36      | 109.50   |
| 1   | A     | 230 | G    | O3'-P-O5'   | 5.93  | 112.90      | 104.00   |
| 1   | A     | 182 | C    | C4'-C3'-C2' | -5.86 | 96.75       | 102.60   |
| 3   | C     | 69  | C    | C4'-C3'-C2' | -5.67 | 96.93       | 102.60   |
| 3   | C     | 69  | C    | O3'-P-O5'   | -5.62 | 95.57       | 104.00   |
| 3   | C     | 46  | U    | C2'-C3'-O3' | 5.57  | 117.86      | 109.50   |
| 1   | A     | 137 | A    | O3'-P-O5'   | -5.33 | 96.01       | 104.00   |
| 1   | A     | 75  | U    | C1'-C2'-O2' | -5.15 | 104.08      | 111.80   |
| 1   | A     | 230 | G    | C4'-C3'-C2' | -5.14 | 97.46       | 102.60   |
| 1   | A     | 69  | C    | O3'-P-O5'   | 5.03  | 111.54      | 104.00   |

There are no chirality outliers.

All (1) planarity outliers are listed below:

| Mol | Chain | Res | Type | Group     |
|-----|-------|-----|------|-----------|
| 2   | B     | 59  | ARG  | Sidechain |

## 5.2 Too-close contacts [i](#)

In the following table, the Non-H and H(model) columns list the number of non-hydrogen atoms and hydrogen atoms in the chain respectively. The H(added) column lists the number of hydrogen atoms added and optimized by MolProbity. The Clashes column lists the number of clashes within the asymmetric unit, whereas Symm-Clashes lists symmetry-related clashes.

| Mol | Chain | Non-H | H(model) | H(added) | Clashes | Symm-Clashes |
|-----|-------|-------|----------|----------|---------|--------------|
| 1   | A     | 8962  | 0        | 4511     | 225     | 0            |
| 2   | B     | 947   | 0        | 1008     | 23      | 0            |
| 3   | C     | 1889  | 0        | 957      | 42      | 0            |
| 3   | E     | 188   | 0        | 96       | 9       | 0            |
| 4   | A     | 25    | 0        | 0        | 0       | 0            |
| All | All   | 12011 | 0        | 6572     | 288     | 0            |

The all-atom clashscore is defined as the number of clashes found per 1000 atoms (including hydrogen atoms). The all-atom clashscore for this structure is 17.

All (288) close contacts within the same asymmetric unit are listed below, sorted by their clash magnitude.

| Atom-1         | Atom-2          | Interatomic distance (Å) | Clash overlap (Å) |
|----------------|-----------------|--------------------------|-------------------|
| 1:A:148:A:H2'  | 1:A:149:G:O4'   | 1.43                     | 1.17              |
| 1:A:364:A:C4   | 1:A:365:G:H1'   | 1.96                     | 1.00              |
| 1:A:371:U:H5'' | 1:A:372:G:H5'   | 1.56                     | 0.86              |
| 1:A:85:G:H1'   | 1:A:86:U:H5     | 1.40                     | 0.84              |
| 1:A:363:A:H2'  | 1:A:364:A:C4    | 2.13                     | 0.83              |
| 1:A:174:U:H2'  | 1:A:175:U:C6    | 2.20                     | 0.77              |
| 1:A:378:C:H3'  | 1:A:379:G:C8    | 2.19                     | 0.77              |
| 1:A:367:C:H2'  | 1:A:368:G:C8    | 2.20                     | 0.76              |
| 1:A:203:G:C5   | 1:A:205:A:H1'   | 2.21                     | 0.76              |
| 1:A:45:A:H62   | 2:B:62:ARG:NH2  | 1.83                     | 0.76              |
| 1:A:127:G:H2'  | 1:A:128:G:H4'   | 1.66                     | 0.76              |
| 3:C:-11:A:H2   | 3:E:-7:U:H3     | 1.34                     | 0.73              |
| 1:A:147:A:H2'  | 1:A:148:A:C8    | 2.22                     | 0.73              |
| 1:A:349:G:H22  | 1:A:379:G:H1'   | 1.55                     | 0.72              |
| 1:A:45:A:C2    | 1:A:388:G:H2'   | 2.24                     | 0.72              |
| 2:B:63:TYR:HB3 | 2:B:97:VAL:HG11 | 1.72                     | 0.71              |

*Continued on next page...*

Continued from previous page...

| Atom-1         | Atom-2          | Interatomic distance (Å) | Clash overlap (Å) |
|----------------|-----------------|--------------------------|-------------------|
| 1:A:9:U:H2'    | 1:A:10:G:H8     | 1.57                     | 0.69              |
| 1:A:47:G:H1    | 1:A:385:A:H62   | 1.39                     | 0.69              |
| 1:A:14:G:C2'   | 1:A:401:A:H61   | 2.06                     | 0.69              |
| 1:A:364:A:C5   | 1:A:365:G:H1'   | 2.27                     | 0.69              |
| 1:A:349:G:H21  | 1:A:350:A:H62   | 1.39                     | 0.68              |
| 1:A:363:A:C8   | 1:A:363:A:H5''  | 2.28                     | 0.68              |
| 2:B:0:GLY:HA3  | 2:B:65:ARG:HB3  | 1.75                     | 0.68              |
| 1:A:378:C:H3'  | 1:A:379:G:H8    | 1.59                     | 0.67              |
| 3:C:17:G:O2'   | 3:C:56:G:N2     | 2.27                     | 0.67              |
| 1:A:174:U:H2'  | 1:A:175:U:H6    | 1.60                     | 0.67              |
| 1:A:180:U:H2'  | 1:A:181:A:H8    | 1.59                     | 0.66              |
| 3:C:-7:U:H2'   | 3:C:-6:C:O4'    | 1.95                     | 0.66              |
| 1:A:364:A:H3'  | 1:A:365:G:O4'   | 1.95                     | 0.65              |
| 1:A:199:U:H1'  | 1:A:207:C:O5'   | 1.98                     | 0.64              |
| 1:A:349:G:N2   | 1:A:379:G:H1'   | 2.12                     | 0.64              |
| 1:A:72:A:H2'   | 1:A:73:G:C8     | 2.33                     | 0.63              |
| 1:A:161:G:H3'  | 1:A:162:G:H8    | 1.63                     | 0.63              |
| 1:A:149:G:H2'  | 1:A:150:A:C8    | 2.33                     | 0.63              |
| 1:A:197:A:C2   | 1:A:229:G:H1'   | 2.33                     | 0.63              |
| 2:B:56:VAL:O   | 2:B:60:ILE:HG13 | 1.99                     | 0.62              |
| 3:C:27:C:H2'   | 3:C:28:A:C8     | 2.34                     | 0.62              |
| 1:A:85:G:H1'   | 1:A:86:U:C5     | 2.29                     | 0.62              |
| 1:A:363:A:O3'  | 1:A:364:A:O4'   | 2.15                     | 0.62              |
| 1:A:173:G:O2'  | 1:A:174:U:H5'   | 2.00                     | 0.61              |
| 1:A:3:U:H2'    | 1:A:4:A:C8      | 2.36                     | 0.61              |
| 1:A:197:A:H2   | 1:A:229:G:H1'   | 1.66                     | 0.61              |
| 1:A:316:C:H2'  | 1:A:317:G:C8    | 2.35                     | 0.61              |
| 1:A:154:U:H2'  | 1:A:155:A:C4    | 2.35                     | 0.61              |
| 1:A:45:A:H62   | 2:B:62:ARG:HH22 | 1.46                     | 0.61              |
| 1:A:241:A:H2'  | 1:A:242:C:C6    | 2.36                     | 0.61              |
| 2:B:14:GLN:O   | 2:B:15:GLU:C    | 2.44                     | 0.61              |
| 1:A:160:C:H3'  | 1:A:161:G:H8    | 1.67                     | 0.60              |
| 1:A:148:A:H2'  | 1:A:149:G:C4'   | 2.32                     | 0.60              |
| 1:A:379:G:H4'  | 1:A:380:A:C8    | 2.37                     | 0.59              |
| 2:B:12:GLU:HG2 | 2:B:42:ARG:HH22 | 1.67                     | 0.59              |
| 1:A:229:G:H2'  | 1:A:231:A:N7    | 2.17                     | 0.59              |
| 1:A:379:G:H4'  | 1:A:380:A:H8    | 1.66                     | 0.59              |
| 1:A:32:G:H22   | 1:A:34:U:H1'    | 1.68                     | 0.59              |
| 3:C:10:G:N1    | 3:C:24:C:O2     | 2.36                     | 0.58              |
| 1:A:360:G:N2   | 1:A:363:A:H5''  | 2.18                     | 0.58              |
| 1:A:3:U:H2'    | 1:A:4:A:H8      | 1.68                     | 0.58              |

Continued on next page...

Continued from previous page...

| Atom-1          | Atom-2           | Interatomic distance (Å) | Clash overlap (Å) |
|-----------------|------------------|--------------------------|-------------------|
| 1:A:130:U:H2'   | 1:A:131:G:C8     | 2.38                     | 0.58              |
| 2:B:64:ILE:HG23 | 2:B:101:LEU:HD21 | 1.84                     | 0.57              |
| 3:C:40:U:H2'    | 3:C:41:G:C8      | 2.39                     | 0.57              |
| 1:A:360:G:H22   | 1:A:363:A:H5''   | 1.68                     | 0.57              |
| 1:A:6:U:H2'     | 1:A:7:C:C6       | 2.40                     | 0.57              |
| 1:A:9:U:H2'     | 1:A:10:G:C8      | 2.39                     | 0.57              |
| 1:A:364:A:H3'   | 1:A:364:A:OP2    | 2.05                     | 0.56              |
| 3:C:38:G:H2'    | 3:C:39:G:C8      | 2.40                     | 0.56              |
| 1:A:2:U:H2'     | 1:A:3:U:C6       | 2.40                     | 0.56              |
| 1:A:4:A:H2'     | 1:A:5:A:H8       | 1.70                     | 0.56              |
| 1:A:315:G:H2'   | 1:A:316:C:C6     | 2.40                     | 0.56              |
| 1:A:364:A:OP2   | 1:A:365:G:O4'    | 2.21                     | 0.56              |
| 3:C:26:C:H2'    | 3:C:27:C:C6      | 2.41                     | 0.56              |
| 1:A:10:G:H2'    | 1:A:11:C:H6      | 1.70                     | 0.56              |
| 1:A:374:A:H2'   | 1:A:375:G:C8     | 2.41                     | 0.56              |
| 1:A:364:A:OP1   | 1:A:365:G:N7     | 2.35                     | 0.55              |
| 1:A:186:G:H8    | 1:A:186:G:H5''   | 1.70                     | 0.55              |
| 1:A:412:A:H2'   | 1:A:413:A:C8     | 2.41                     | 0.55              |
| 2:B:92:MET:HB3  | 2:B:97:VAL:HG23  | 1.88                     | 0.55              |
| 3:C:-11:A:H2'   | 3:C:-10:U:C6     | 2.40                     | 0.55              |
| 3:C:43:G:H3'    | 3:C:44:G:H2'     | 1.89                     | 0.55              |
| 3:E:-7:U:H2'    | 3:E:-6:C:C6      | 2.42                     | 0.55              |
| 1:A:5:A:H2'     | 1:A:6:U:C6       | 2.42                     | 0.55              |
| 1:A:308:A:N1    | 1:A:329:U:H5     | 2.04                     | 0.55              |
| 1:A:360:G:H22   | 1:A:363:A:C5'    | 2.19                     | 0.55              |
| 1:A:186:G:H5''  | 1:A:186:G:C8     | 2.41                     | 0.54              |
| 1:A:102:C:H2'   | 1:A:103:C:O4'    | 2.08                     | 0.54              |
| 1:A:307:G:H2'   | 1:A:308:A:H8     | 1.70                     | 0.54              |
| 1:A:7:C:H2'     | 1:A:8:A:H8       | 1.72                     | 0.54              |
| 1:A:414:C:H2'   | 1:A:415:G:H8     | 1.72                     | 0.54              |
| 1:A:186:G:N2    | 1:A:188:A:H3'    | 2.23                     | 0.53              |
| 1:A:264:U:H2'   | 1:A:265:G:O4'    | 2.09                     | 0.53              |
| 1:A:364:A:C3'   | 1:A:365:G:O4'    | 2.56                     | 0.53              |
| 1:A:5:A:H2'     | 1:A:6:U:H6       | 1.72                     | 0.53              |
| 3:C:-9:U:H3     | 3:E:-9:U:H3      | 1.56                     | 0.53              |
| 1:A:147:A:H2'   | 1:A:148:A:H8     | 1.71                     | 0.53              |
| 1:A:6:U:H2'     | 1:A:7:C:H6       | 1.74                     | 0.52              |
| 1:A:166:G:H2'   | 1:A:167:G:C8     | 2.45                     | 0.52              |
| 1:A:198:G:N2    | 1:A:201:A:OP2    | 2.42                     | 0.52              |
| 1:A:4:A:H2'     | 1:A:5:A:C8       | 2.44                     | 0.52              |
| 1:A:122:G:H3'   | 1:A:123:C:H5''   | 1.90                     | 0.52              |

Continued on next page...

Continued from previous page...

| Atom-1         | Atom-2        | Interatomic distance (Å) | Clash overlap (Å) |
|----------------|---------------|--------------------------|-------------------|
| 3:C:41:G:H2'   | 3:C:42:G:C8   | 2.45                     | 0.52              |
| 1:A:216:A:O2'  | 1:A:217:A:H8  | 1.93                     | 0.52              |
| 1:A:70:U:H2'   | 1:A:71:G:O4'  | 2.10                     | 0.51              |
| 1:A:267:U:C2   | 3:C:75:A:C2   | 2.99                     | 0.51              |
| 1:A:197:A:H2'  | 1:A:228:U:O2' | 2.10                     | 0.51              |
| 1:A:14:G:C1'   | 1:A:401:A:H61 | 2.24                     | 0.51              |
| 1:A:219:C:H2'  | 1:A:220:C:H6  | 1.76                     | 0.51              |
| 1:A:347:C:H2'  | 1:A:348:G:O4' | 2.10                     | 0.51              |
| 1:A:363:A:H5'' | 1:A:363:A:H8  | 1.74                     | 0.51              |
| 3:C:12:U:H2'   | 3:C:13:C:O4'  | 2.11                     | 0.51              |
| 3:C:-8:U:C2    | 3:C:-7:U:C5   | 2.99                     | 0.51              |
| 1:A:148:A:C4   | 1:A:149:G:H1' | 2.46                     | 0.50              |
| 1:A:376:U:H2'  | 1:A:377:A:C8  | 2.45                     | 0.50              |
| 3:E:-9:U:H2'   | 3:E:-8:U:H6   | 1.76                     | 0.50              |
| 1:A:14:G:H1'   | 1:A:401:A:H61 | 1.77                     | 0.50              |
| 1:A:85:G:O2'   | 1:A:87:U:O4   | 2.28                     | 0.50              |
| 1:A:124:U:H2'  | 1:A:125:U:O4' | 2.11                     | 0.50              |
| 3:C:8:U:O2     | 3:C:20:A:H2   | 1.94                     | 0.50              |
| 1:A:182:C:H2'  | 1:A:183:C:H6  | 1.76                     | 0.50              |
| 3:C:44:G:H4'   | 3:C:45:G:O5'  | 2.12                     | 0.50              |
| 1:A:128:G:H2'  | 1:A:129:C:C6  | 2.46                     | 0.50              |
| 1:A:356:A:H3'  | 1:A:357:G:H8  | 1.76                     | 0.50              |
| 1:A:317:G:N1   | 1:A:321:G:C2  | 2.79                     | 0.49              |
| 1:A:361:C:O2'  | 1:A:362:A:H3' | 2.12                     | 0.49              |
| 3:C:42:G:H2'   | 3:C:43:G:C8   | 2.47                     | 0.49              |
| 1:A:23:C:O2    | 1:A:336:A:O2' | 2.28                     | 0.49              |
| 1:A:10:G:H2'   | 1:A:11:C:C6   | 2.47                     | 0.49              |
| 1:A:228:U:H2'  | 1:A:229:G:O4' | 2.12                     | 0.49              |
| 1:A:236:G:H2'  | 1:A:237:G:O4' | 2.12                     | 0.49              |
| 1:A:363:A:O2'  | 1:A:364:A:C1' | 2.60                     | 0.49              |
| 1:A:307:G:H2'  | 1:A:308:A:C8  | 2.46                     | 0.49              |
| 1:A:348:G:N2   | 1:A:380:A:N7  | 2.61                     | 0.49              |
| 1:A:49:A:N1    | 1:A:387:A:O2' | 2.42                     | 0.49              |
| 1:A:371:U:H4'  | 1:A:373:C:H5  | 1.78                     | 0.49              |
| 3:C:29:C:H2'   | 3:C:30:C:C6   | 2.47                     | 0.49              |
| 1:A:161:G:H3'  | 1:A:162:G:C8  | 2.45                     | 0.49              |
| 3:C:10:G:N3    | 3:C:10:G:H2'  | 2.26                     | 0.49              |
| 1:A:15:G:N2    | 1:A:345:G:H1' | 2.28                     | 0.49              |
| 1:A:202:C:H5'  | 1:A:203:G:C8  | 2.48                     | 0.49              |
| 1:A:115:C:H2'  | 1:A:116:A:C8  | 2.48                     | 0.48              |
| 1:A:160:C:H3'  | 1:A:161:G:C8  | 2.46                     | 0.48              |

Continued on next page...

Continued from previous page...

| Atom-1           | Atom-2         | Interatomic distance (Å) | Clash overlap (Å) |
|------------------|----------------|--------------------------|-------------------|
| 1:A:352:U:H2'    | 1:A:353:A:C8   | 2.49                     | 0.48              |
| 1:A:178:A:OP1    | 1:A:180:U:H1'  | 2.14                     | 0.48              |
| 1:A:180:U:O2'    | 1:A:181:A:H5'  | 2.13                     | 0.48              |
| 1:A:186:G:N1     | 1:A:189:A:OP2  | 2.39                     | 0.48              |
| 1:A:280:U:H2'    | 1:A:281:U:C6   | 2.49                     | 0.48              |
| 1:A:7:C:H2'      | 1:A:8:A:C8     | 2.49                     | 0.48              |
| 3:E:-8:U:C4      | 3:E:-7:U:C4    | 3.02                     | 0.48              |
| 1:A:130:U:H2'    | 1:A:131:G:H8   | 1.78                     | 0.48              |
| 1:A:280:U:H2'    | 1:A:281:U:H6   | 1.79                     | 0.48              |
| 1:A:149:G:N2     | 1:A:177:G:H1'  | 2.28                     | 0.48              |
| 1:A:385:A:H1'    | 1:A:401:A:C8   | 2.49                     | 0.48              |
| 1:A:354:C:H2'    | 1:A:355:G:C8   | 2.49                     | 0.47              |
| 3:C:-9:U:O2'     | 3:C:-8:U:H5'   | 2.14                     | 0.47              |
| 1:A:338:G:H2'    | 1:A:339:A:C8   | 2.49                     | 0.47              |
| 1:A:411:U:H2'    | 1:A:412:A:C8   | 2.49                     | 0.47              |
| 1:A:360:G:H1'    | 1:A:365:G:N2   | 2.29                     | 0.47              |
| 1:A:132:G:H3'    | 1:A:133:G:H8   | 1.79                     | 0.47              |
| 1:A:357:G:H22    | 1:A:367:C:H42  | 1.61                     | 0.47              |
| 3:E:-8:U:C6      | 3:E:-8:U:H5''  | 2.49                     | 0.47              |
| 1:A:229:G:H5''   | 1:A:229:G:H8   | 1.79                     | 0.47              |
| 1:A:268:G:H2'    | 1:A:269:G:H8   | 1.79                     | 0.47              |
| 1:A:176:C:H2'    | 1:A:177:G:C8   | 2.50                     | 0.47              |
| 1:A:401:A:H2'    | 1:A:402:G:O4'  | 2.13                     | 0.47              |
| 2:B:111:LEU:C    | 2:B:113:LYS:N  | 2.72                     | 0.47              |
| 3:E:-9:U:H2'     | 3:E:-8:U:C6    | 2.49                     | 0.47              |
| 1:A:335:G:C8     | 1:A:335:G:H3'  | 2.50                     | 0.47              |
| 2:B:112:LYS:O    | 2:B:113:LYS:C  | 2.58                     | 0.47              |
| 1:A:180:U:H2'    | 1:A:181:A:C8   | 2.45                     | 0.46              |
| 1:A:172:G:C4     | 1:A:173:G:C8   | 3.03                     | 0.46              |
| 1:A:349:G:N2     | 1:A:350:A:H62  | 2.09                     | 0.46              |
| 3:C:27:C:H2'     | 3:C:28:A:H8    | 1.80                     | 0.46              |
| 3:C:24:C:H2'     | 3:C:25:A:C8    | 2.51                     | 0.46              |
| 1:A:14:G:H2'     | 1:A:385:A:N1   | 2.30                     | 0.46              |
| 1:A:59:U:H2'     | 1:A:60:C:C6    | 2.51                     | 0.46              |
| 1:A:71:G:O2'     | 1:A:73:G:N7    | 2.41                     | 0.46              |
| 1:A:285:G:O2'    | 1:A:300:A:N6   | 2.49                     | 0.46              |
| 1:A:319:A:H1'    | 1:A:320:U:C5   | 2.51                     | 0.46              |
| 1:A:30:C:H2'     | 1:A:31:G:C8    | 2.49                     | 0.46              |
| 2:B:101:LEU:HD12 | 2:B:101:LEU:HA | 1.81                     | 0.46              |
| 1:A:173:G:H2'    | 1:A:174:U:H6   | 1.81                     | 0.46              |
| 1:A:71:G:N1      | 1:A:74:A:OP2   | 2.47                     | 0.46              |

Continued on next page...

Continued from previous page...

| Atom-1         | Atom-2          | Interatomic distance (Å) | Clash overlap (Å) |
|----------------|-----------------|--------------------------|-------------------|
| 1:A:342:A:H2'  | 1:A:343:C:O4'   | 2.16                     | 0.46              |
| 3:C:37:A:H2'   | 3:C:38:G:C8     | 2.51                     | 0.46              |
| 1:A:184:C:H2'  | 1:A:185:U:C6    | 2.51                     | 0.45              |
| 1:A:292:A:H2'  | 1:A:293:U:C6    | 2.51                     | 0.45              |
| 1:A:268:G:C2   | 3:C:75:A:C2     | 3.04                     | 0.45              |
| 1:A:338:G:H2'  | 1:A:339:A:H8    | 1.80                     | 0.45              |
| 3:C:-13:G:C4   | 3:C:-12:G:C8    | 3.05                     | 0.45              |
| 3:C:-8:U:HO2'  | 3:C:-7:U:H6     | 1.64                     | 0.45              |
| 1:A:348:G:H3'  | 1:A:349:G:H8    | 1.81                     | 0.45              |
| 2:B:24:ALA:HB2 | 2:B:29:VAL:HG13 | 1.98                     | 0.45              |
| 1:A:219:C:H2'  | 1:A:220:C:C6    | 2.52                     | 0.45              |
| 1:A:67:U:H4'   | 1:A:68:G:OP1    | 2.17                     | 0.45              |
| 1:A:32:G:N2    | 1:A:34:U:H1'    | 2.32                     | 0.45              |
| 2:B:99:LYS:HD3 | 2:B:99:LYS:O    | 2.17                     | 0.44              |
| 3:C:43:G:H3'   | 3:C:44:G:C2'    | 2.47                     | 0.44              |
| 1:A:380:A:H2'  | 1:A:380:A:N3    | 2.32                     | 0.44              |
| 1:A:416:U:H2'  | 1:A:417:C:O4'   | 2.17                     | 0.44              |
| 1:A:292:A:H2'  | 1:A:293:U:H6    | 1.82                     | 0.44              |
| 2:B:111:LEU:C  | 2:B:113:LYS:H   | 2.25                     | 0.44              |
| 3:C:-9:U:H2'   | 3:C:-8:U:C6     | 2.53                     | 0.44              |
| 1:A:101:U:OP2  | 1:A:279:C:H4'   | 2.17                     | 0.44              |
| 1:A:155:A:H2'  | 1:A:156:C:C6    | 2.53                     | 0.44              |
| 1:A:175:U:H2'  | 1:A:176:C:H6    | 1.82                     | 0.44              |
| 1:A:175:U:H2'  | 1:A:176:C:C6    | 2.53                     | 0.44              |
| 2:B:14:GLN:O   | 2:B:17:PHE:N    | 2.51                     | 0.44              |
| 1:A:114:G:H2'  | 1:A:115:C:C6    | 2.52                     | 0.44              |
| 1:A:331:G:H4'  | 1:A:332:A:H5'   | 1.99                     | 0.44              |
| 1:A:382:G:H2'  | 1:A:383:G:O4'   | 2.18                     | 0.44              |
| 1:A:182:C:H2'  | 1:A:183:C:C6    | 2.52                     | 0.44              |
| 1:A:217:A:H2'  | 1:A:218:A:O4'   | 2.18                     | 0.44              |
| 1:A:358:G:H1   | 1:A:366:C:H42   | 1.66                     | 0.44              |
| 1:A:360:G:H3'  | 1:A:361:C:H6    | 1.82                     | 0.43              |
| 3:C:-10:U:C2   | 3:C:-9:U:C5     | 3.06                     | 0.43              |
| 1:A:151:A:H2'  | 1:A:152:C:O4'   | 2.18                     | 0.43              |
| 1:A:365:G:H2'  | 1:A:365:G:N3    | 2.33                     | 0.43              |
| 3:C:34:C:H2'   | 3:C:35:C:H6     | 1.83                     | 0.43              |
| 1:A:32:G:H2'   | 1:A:32:G:N3     | 2.32                     | 0.43              |
| 1:A:414:C:H2'  | 1:A:415:G:C8    | 2.53                     | 0.43              |
| 1:A:204:G:N1   | 1:A:235:C:N3    | 2.67                     | 0.43              |
| 1:A:123:C:H2'  | 1:A:124:U:O4'   | 2.18                     | 0.43              |
| 1:A:364:A:H2'  | 1:A:365:G:O4'   | 2.18                     | 0.43              |

Continued on next page...

Continued from previous page...

| Atom-1          | Atom-2           | Interatomic distance (Å) | Clash overlap (Å) |
|-----------------|------------------|--------------------------|-------------------|
| 2:B:98:LYS:O    | 2:B:102:ILE:HD13 | 2.19                     | 0.43              |
| 3:C:18:G:C5     | 3:C:56:G:N2      | 2.86                     | 0.43              |
| 1:A:313:C:H2'   | 1:A:314:G:C8     | 2.54                     | 0.43              |
| 1:A:317:G:C5    | 1:A:318:C:N3     | 2.86                     | 0.43              |
| 1:A:369:C:H2'   | 1:A:370:U:O4'    | 2.19                     | 0.43              |
| 3:E:-12:G:H2'   | 3:E:-11:A:O4'    | 2.19                     | 0.43              |
| 1:A:128:G:H2'   | 1:A:129:C:H6     | 1.82                     | 0.42              |
| 1:A:380:A:C2    | 1:A:381:A:H1'    | 2.54                     | 0.42              |
| 1:A:95:A:H2'    | 1:A:96:G:H8      | 1.85                     | 0.42              |
| 1:A:355:G:H2'   | 1:A:356:A:C8     | 2.53                     | 0.42              |
| 1:A:348:G:H1'   | 1:A:382:G:N2     | 2.34                     | 0.42              |
| 2:B:86:ARG:HH12 | 3:E:-13:G:H1'    | 1.84                     | 0.42              |
| 1:A:95:A:H2'    | 1:A:96:G:C8      | 2.55                     | 0.42              |
| 1:A:38:G:H2'    | 1:A:39:C:C6      | 2.55                     | 0.42              |
| 1:A:56:U:H2'    | 1:A:57:G:H8      | 1.85                     | 0.42              |
| 1:A:334:A:H62   | 2:B:10:ASN:ND2   | 2.17                     | 0.42              |
| 1:A:363:A:C2'   | 1:A:364:A:C1'    | 2.93                     | 0.42              |
| 1:A:179:U:H1'   | 1:A:203:G:H5'    | 2.02                     | 0.42              |
| 1:A:354:C:H2'   | 1:A:355:G:O4'    | 2.19                     | 0.42              |
| 2:B:73:GLU:N    | 2:B:73:GLU:OE1   | 2.52                     | 0.42              |
| 1:A:115:C:H2'   | 1:A:116:A:H8     | 1.85                     | 0.42              |
| 2:B:12:GLU:HG2  | 2:B:42:ARG:NH2   | 2.32                     | 0.42              |
| 1:A:10:G:C6     | 1:A:406:A:N1     | 2.88                     | 0.42              |
| 1:A:81:U:H1'    | 1:A:82:A:N7      | 2.35                     | 0.42              |
| 1:A:322:C:H2'   | 1:A:323:A:C8     | 2.55                     | 0.42              |
| 1:A:260:C:H2'   | 1:A:261:A:O4'    | 2.20                     | 0.42              |
| 1:A:324:G:H2'   | 1:A:325:C:H6     | 1.84                     | 0.42              |
| 3:C:-10:U:H2'   | 3:C:-9:U:C6      | 2.55                     | 0.42              |
| 1:A:75:U:O2'    | 1:A:76:G:P       | 2.78                     | 0.41              |
| 1:A:216:A:HO2'  | 1:A:217:A:H8     | 1.67                     | 0.41              |
| 1:A:267:U:C4    | 3:C:75:A:C4      | 3.08                     | 0.41              |
| 1:A:279:C:H2'   | 1:A:280:U:H6     | 1.85                     | 0.41              |
| 1:A:335:G:C8    | 1:A:335:G:C3'    | 3.03                     | 0.41              |
| 1:A:364:A:H3'   | 1:A:364:A:P      | 2.60                     | 0.41              |
| 3:C:29:C:H2'    | 3:C:30:C:H6      | 1.85                     | 0.41              |
| 1:A:117:G:H3'   | 1:A:118:C:H6     | 1.85                     | 0.41              |
| 1:A:134:C:H2'   | 1:A:135:U:C6     | 2.56                     | 0.41              |
| 1:A:189:A:N3    | 1:A:189:A:H2'    | 2.34                     | 0.41              |
| 1:A:279:C:H2'   | 1:A:280:U:C6     | 2.55                     | 0.41              |
| 3:C:21:G:OP2    | 3:C:21:G:H8      | 2.03                     | 0.41              |
| 3:C:67:U:H2'    | 3:C:68:C:O4'     | 2.20                     | 0.41              |

Continued on next page...

Continued from previous page...

| Atom-1         | Atom-2          | Interatomic distance (Å) | Clash overlap (Å) |
|----------------|-----------------|--------------------------|-------------------|
| 1:A:321:G:H2'  | 1:A:322:C:C6    | 2.55                     | 0.41              |
| 1:A:144:G:C6   | 1:A:145:G:C4    | 3.09                     | 0.41              |
| 1:A:220:C:H2'  | 1:A:221:U:H6    | 1.85                     | 0.41              |
| 1:A:266:A:N3   | 1:A:266:A:H2'   | 2.36                     | 0.41              |
| 1:A:334:A:H62  | 2:B:10:ASN:HD22 | 1.68                     | 0.41              |
| 1:A:406:A:H2'  | 1:A:407:U:O4'   | 2.20                     | 0.41              |
| 3:C:-9:U:C2    | 3:C:-8:U:C5     | 3.09                     | 0.41              |
| 1:A:180:U:C2'  | 1:A:181:A:H5'   | 2.51                     | 0.41              |
| 2:B:49:LYS:HG3 | 3:C:-1:U:O5'    | 2.20                     | 0.41              |
| 1:A:54:C:C2    | 1:A:395:G:C2    | 3.09                     | 0.41              |
| 1:A:102:C:O5'  | 1:A:102:C:H6    | 2.03                     | 0.41              |
| 1:A:174:U:H5'' | 1:A:220:C:OP1   | 2.21                     | 0.41              |
| 1:A:220:C:H2'  | 1:A:221:U:C6    | 2.56                     | 0.41              |
| 1:A:352:U:H2'  | 1:A:353:A:H8    | 1.84                     | 0.41              |
| 1:A:353:A:H2'  | 1:A:354:C:O4'   | 2.21                     | 0.41              |
| 1:A:397:U:H2'  | 1:A:398:U:C6    | 2.56                     | 0.41              |
| 3:C:43:G:H3'   | 3:C:44:G:H3'    | 2.02                     | 0.41              |
| 1:A:71:G:N2    | 1:A:73:G:H3'    | 2.36                     | 0.41              |
| 1:A:335:G:H3'  | 1:A:335:G:H8    | 1.85                     | 0.41              |
| 1:A:373:C:H2'  | 1:A:374:A:C8    | 2.56                     | 0.41              |
| 1:A:380:A:C2   | 1:A:381:A:N9    | 2.89                     | 0.40              |
| 3:C:49:C:H2'   | 3:C:50:G:C8     | 2.56                     | 0.40              |
| 3:C:13:C:H42   | 3:C:21:G:H1     | 1.69                     | 0.40              |
| 1:A:32:G:H3'   | 1:A:33:U:C6     | 2.57                     | 0.40              |
| 1:A:150:A:H3'  | 1:A:151:A:H8    | 1.85                     | 0.40              |
| 1:A:241:A:H2'  | 1:A:242:C:H6    | 1.84                     | 0.40              |

There are no symmetry-related clashes.

## 5.3 Torsion angles [i](#)

### 5.3.1 Protein backbone [i](#)

In the following table, the Percentiles column shows the percent Ramachandran outliers of the chain as a percentile score with respect to all PDB entries followed by that with respect to all EM entries.

The Analysed column shows the number of residues for which the backbone conformation was analysed, and the total number of residues.

| Mol | Chain | Analysed      | Favoured  | Allowed | Outliers | Percentiles |     |
|-----|-------|---------------|-----------|---------|----------|-------------|-----|
| 2   | B     | 114/116 (98%) | 109 (96%) | 5 (4%)  | 0        | 100         | 100 |

There are no Ramachandran outliers to report.

### 5.3.2 Protein sidechains [i](#)

In the following table, the Percentiles column shows the percent sidechain outliers of the chain as a percentile score with respect to all PDB entries followed by that with respect to all EM entries.

The Analysed column shows the number of residues for which the sidechain conformation was analysed, and the total number of residues.

| Mol | Chain | Analysed     | Rotameric | Outliers | Percentiles |    |
|-----|-------|--------------|-----------|----------|-------------|----|
| 2   | B     | 99/99 (100%) | 93 (94%)  | 6 (6%)   | 15          | 35 |

All (6) residues with a non-rotameric sidechain are listed below:

| Mol | Chain | Res | Type |
|-----|-------|-----|------|
| 2   | B     | 14  | GLN  |
| 2   | B     | 71  | LEU  |
| 2   | B     | 92  | MET  |
| 2   | B     | 97  | VAL  |
| 2   | B     | 105 | LEU  |
| 2   | B     | 111 | LEU  |

Sometimes sidechains can be flipped to improve hydrogen bonding and reduce clashes. All (3) such sidechains are listed below:

| Mol | Chain | Res | Type |
|-----|-------|-----|------|
| 2   | B     | 10  | ASN  |
| 2   | B     | 14  | GLN  |
| 2   | B     | 66  | GLN  |

### 5.3.3 RNA [i](#)

| Mol | Chain | Analysed      | Backbone Outliers | Pucker Outliers |
|-----|-------|---------------|-------------------|-----------------|
| 1   | A     | 416/417 (99%) | 168 (40%)         | 15 (3%)         |
| 3   | C     | 88/92 (95%)   | 47 (53%)          | 7 (7%)          |
| 3   | E     | 8/92 (8%)     | 5 (62%)           | 0               |
| All | All   | 512/601 (85%) | 220 (42%)         | 22 (4%)         |

All (220) RNA backbone outliers are listed below:

| Mol | Chain | Res | Type |
|-----|-------|-----|------|
| 1   | A     | 2   | U    |
| 1   | A     | 9   | U    |
| 1   | A     | 11  | C    |
| 1   | A     | 15  | G    |
| 1   | A     | 22  | G    |
| 1   | A     | 28  | G    |
| 1   | A     | 30  | C    |
| 1   | A     | 32  | G    |
| 1   | A     | 33  | U    |
| 1   | A     | 35  | U    |
| 1   | A     | 36  | C    |
| 1   | A     | 44  | G    |
| 1   | A     | 47  | G    |
| 1   | A     | 48  | A    |
| 1   | A     | 49  | A    |
| 1   | A     | 50  | A    |
| 1   | A     | 51  | G    |
| 1   | A     | 52  | U    |
| 1   | A     | 53  | C    |
| 1   | A     | 63  | A    |
| 1   | A     | 65  | G    |
| 1   | A     | 67  | U    |
| 1   | A     | 68  | G    |
| 1   | A     | 70  | U    |
| 1   | A     | 72  | A    |
| 1   | A     | 74  | A    |
| 1   | A     | 75  | U    |
| 1   | A     | 76  | G    |
| 1   | A     | 85  | G    |
| 1   | A     | 86  | U    |
| 1   | A     | 88  | C    |
| 1   | A     | 89  | G    |
| 1   | A     | 90  | U    |
| 1   | A     | 91  | G    |
| 1   | A     | 92  | C    |
| 1   | A     | 99  | A    |
| 1   | A     | 102 | C    |
| 1   | A     | 104 | A    |
| 1   | A     | 105 | U    |
| 1   | A     | 117 | G    |
| 1   | A     | 118 | C    |
| 1   | A     | 122 | G    |

*Continued on next page...*

*Continued from previous page...*

| Mol | Chain | Res | Type |
|-----|-------|-----|------|
| 1   | A     | 123 | C    |
| 1   | A     | 126 | U    |
| 1   | A     | 127 | G    |
| 1   | A     | 128 | G    |
| 1   | A     | 130 | U    |
| 1   | A     | 131 | G    |
| 1   | A     | 132 | G    |
| 1   | A     | 134 | C    |
| 1   | A     | 137 | A    |
| 1   | A     | 138 | C    |
| 1   | A     | 139 | G    |
| 1   | A     | 147 | A    |
| 1   | A     | 150 | A    |
| 1   | A     | 151 | A    |
| 1   | A     | 152 | C    |
| 1   | A     | 155 | A    |
| 1   | A     | 156 | C    |
| 1   | A     | 157 | G    |
| 1   | A     | 158 | U    |
| 1   | A     | 159 | C    |
| 1   | A     | 163 | C    |
| 1   | A     | 172 | G    |
| 1   | A     | 173 | G    |
| 1   | A     | 174 | U    |
| 1   | A     | 175 | U    |
| 1   | A     | 177 | G    |
| 1   | A     | 179 | U    |
| 1   | A     | 180 | U    |
| 1   | A     | 181 | A    |
| 1   | A     | 182 | C    |
| 1   | A     | 183 | C    |
| 1   | A     | 186 | G    |
| 1   | A     | 187 | A    |
| 1   | A     | 188 | A    |
| 1   | A     | 189 | A    |
| 1   | A     | 190 | G    |
| 1   | A     | 192 | G    |
| 1   | A     | 196 | C    |
| 1   | A     | 199 | U    |
| 1   | A     | 202 | C    |
| 1   | A     | 203 | G    |
| 1   | A     | 204 | G    |

*Continued on next page...*

*Continued from previous page...*

| Mol | Chain | Res | Type |
|-----|-------|-----|------|
| 1   | A     | 205 | A    |
| 1   | A     | 207 | C    |
| 1   | A     | 216 | A    |
| 1   | A     | 219 | C    |
| 1   | A     | 225 | A    |
| 1   | A     | 229 | G    |
| 1   | A     | 230 | G    |
| 1   | A     | 231 | A    |
| 1   | A     | 232 | A    |
| 1   | A     | 233 | C    |
| 1   | A     | 234 | G    |
| 1   | A     | 235 | C    |
| 1   | A     | 239 | A    |
| 1   | A     | 240 | A    |
| 1   | A     | 241 | A    |
| 1   | A     | 242 | C    |
| 1   | A     | 250 | G    |
| 1   | A     | 254 | G    |
| 1   | A     | 255 | A    |
| 1   | A     | 256 | A    |
| 1   | A     | 257 | A    |
| 1   | A     | 266 | A    |
| 1   | A     | 267 | U    |
| 1   | A     | 272 | G    |
| 1   | A     | 273 | G    |
| 1   | A     | 274 | G    |
| 1   | A     | 276 | C    |
| 1   | A     | 278 | C    |
| 1   | A     | 290 | A    |
| 1   | A     | 291 | A    |
| 1   | A     | 292 | A    |
| 1   | A     | 293 | U    |
| 1   | A     | 296 | A    |
| 1   | A     | 300 | A    |
| 1   | A     | 304 | A    |
| 1   | A     | 312 | G    |
| 1   | A     | 313 | C    |
| 1   | A     | 314 | G    |
| 1   | A     | 317 | G    |
| 1   | A     | 318 | C    |
| 1   | A     | 321 | G    |
| 1   | A     | 322 | C    |

*Continued on next page...*

*Continued from previous page...*

| Mol | Chain | Res | Type |
|-----|-------|-----|------|
| 1   | A     | 323 | A    |
| 1   | A     | 324 | G    |
| 1   | A     | 328 | G    |
| 1   | A     | 329 | U    |
| 1   | A     | 330 | A    |
| 1   | A     | 333 | U    |
| 1   | A     | 334 | A    |
| 1   | A     | 349 | G    |
| 1   | A     | 350 | A    |
| 1   | A     | 351 | G    |
| 1   | A     | 353 | A    |
| 1   | A     | 358 | G    |
| 1   | A     | 359 | C    |
| 1   | A     | 361 | C    |
| 1   | A     | 362 | A    |
| 1   | A     | 363 | A    |
| 1   | A     | 364 | A    |
| 1   | A     | 365 | G    |
| 1   | A     | 366 | C    |
| 1   | A     | 367 | C    |
| 1   | A     | 368 | G    |
| 1   | A     | 369 | C    |
| 1   | A     | 372 | G    |
| 1   | A     | 373 | C    |
| 1   | A     | 375 | G    |
| 1   | A     | 376 | U    |
| 1   | A     | 379 | G    |
| 1   | A     | 380 | A    |
| 1   | A     | 381 | A    |
| 1   | A     | 382 | G    |
| 1   | A     | 383 | G    |
| 1   | A     | 384 | U    |
| 1   | A     | 389 | A    |
| 1   | A     | 391 | C    |
| 1   | A     | 392 | A    |
| 1   | A     | 400 | U    |
| 1   | A     | 401 | A    |
| 1   | A     | 402 | G    |
| 1   | A     | 403 | A    |
| 1   | A     | 407 | U    |
| 1   | A     | 408 | G    |
| 1   | A     | 410 | U    |

*Continued on next page...*

*Continued from previous page...*

| Mol | Chain | Res | Type |
|-----|-------|-----|------|
| 3   | C     | -10 | U    |
| 3   | C     | -8  | U    |
| 3   | C     | -7  | U    |
| 3   | C     | -6  | C    |
| 3   | C     | -5  | C    |
| 3   | C     | -4  | C    |
| 3   | C     | -3  | U    |
| 3   | C     | -2  | U    |
| 3   | C     | -1  | U    |
| 3   | C     | 0   | C    |
| 3   | C     | 1   | G    |
| 3   | C     | 4   | G    |
| 3   | C     | 7   | G    |
| 3   | C     | 8   | U    |
| 3   | C     | 9   | A    |
| 3   | C     | 10  | G    |
| 3   | C     | 12  | U    |
| 3   | C     | 13  | C    |
| 3   | C     | 15  | G    |
| 3   | C     | 16  | U    |
| 3   | C     | 17  | G    |
| 3   | C     | 18  | G    |
| 3   | C     | 19  | U    |
| 3   | C     | 20  | A    |
| 3   | C     | 21  | G    |
| 3   | C     | 23  | A    |
| 3   | C     | 26  | C    |
| 3   | C     | 29  | C    |
| 3   | C     | 33  | G    |
| 3   | C     | 37  | A    |
| 3   | C     | 40  | U    |
| 3   | C     | 42  | G    |
| 3   | C     | 44  | G    |
| 3   | C     | 45  | G    |
| 3   | C     | 46  | U    |
| 3   | C     | 47  | C    |
| 3   | C     | 48  | G    |
| 3   | C     | 49  | C    |
| 3   | C     | 51  | G    |
| 3   | C     | 52  | G    |
| 3   | C     | 53  | U    |
| 3   | C     | 58  | G    |

*Continued on next page...*

Continued from previous page...

| Mol | Chain | Res | Type |
|-----|-------|-----|------|
| 3   | C     | 59  | U    |
| 3   | C     | 60  | C    |
| 3   | C     | 70  | G    |
| 3   | C     | 72  | U    |
| 3   | C     | 75  | A    |
| 3   | E     | -11 | A    |
| 3   | E     | -10 | U    |
| 3   | E     | -9  | U    |
| 3   | E     | -8  | U    |
| 3   | E     | -7  | U    |

All (22) RNA pucker outliers are listed below:

| Mol | Chain | Res | Type |
|-----|-------|-----|------|
| 1   | A     | 52  | U    |
| 1   | A     | 75  | U    |
| 1   | A     | 122 | G    |
| 1   | A     | 126 | U    |
| 1   | A     | 138 | C    |
| 1   | A     | 176 | C    |
| 1   | A     | 182 | C    |
| 1   | A     | 187 | A    |
| 1   | A     | 230 | G    |
| 1   | A     | 232 | A    |
| 1   | A     | 240 | A    |
| 1   | A     | 292 | A    |
| 1   | A     | 349 | G    |
| 1   | A     | 363 | A    |
| 1   | A     | 365 | G    |
| 3   | C     | -4  | C    |
| 3   | C     | -2  | U    |
| 3   | C     | 7   | G    |
| 3   | C     | 44  | G    |
| 3   | C     | 46  | U    |
| 3   | C     | 59  | U    |
| 3   | C     | 69  | C    |

#### 5.4 Non-standard residues in protein, DNA, RNA chains [i](#)

There are no non-standard protein/DNA/RNA residues in this entry.

## 5.5 Carbohydrates [i](#)

There are no oligosaccharides in this entry.

## 5.6 Ligand geometry [i](#)

Of 25 ligands modelled in this entry, 25 are monoatomic - leaving 0 for Mogul analysis.

There are no bond length outliers.

There are no bond angle outliers.

There are no chirality outliers.

There are no torsion outliers.

There are no ring outliers.

No monomer is involved in short contacts.

## 5.7 Other polymers [i](#)

There are no such residues in this entry.

## 5.8 Polymer linkage issues [i](#)

There are no chain breaks in this entry.

For Manuscript Review

## 6 Map visualisation [i](#)

This section contains visualisations of the EMDB entry EMD-70944. These allow visual inspection of the internal detail of the map and identification of artifacts.

Images derived from a raw map, generated by summing the deposited half-maps, are presented below the corresponding image components of the primary map to allow further visual inspection and comparison with those of the primary map.

### 6.1 Orthogonal projections [i](#)

#### 6.1.1 Primary map

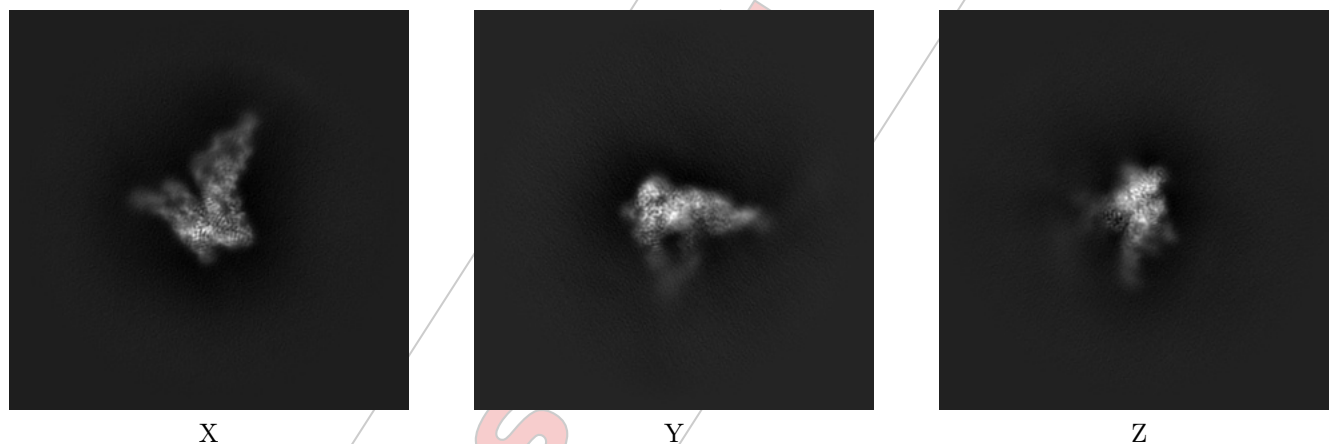

#### 6.1.2 Raw map

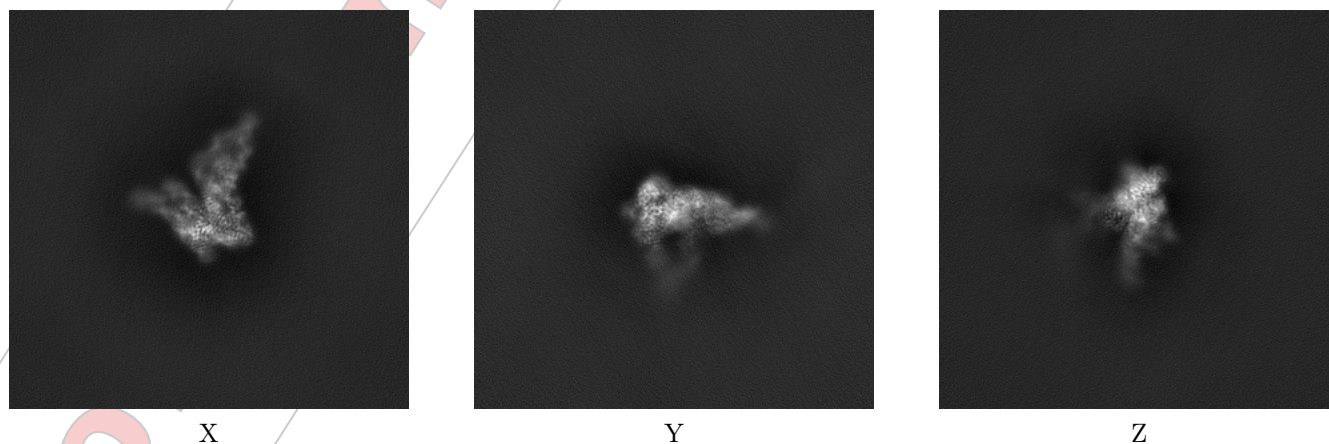

The images above show the map projected in three orthogonal directions.

## 6.2 Central slices [i](#)

### 6.2.1 Primary map

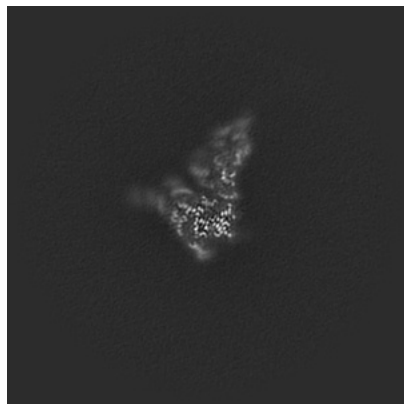

X Index: 200

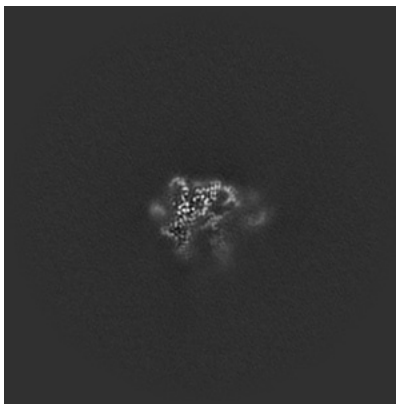

Y Index: 200

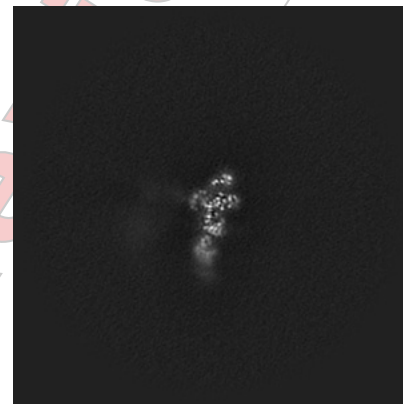

Z Index: 200

### 6.2.2 Raw map

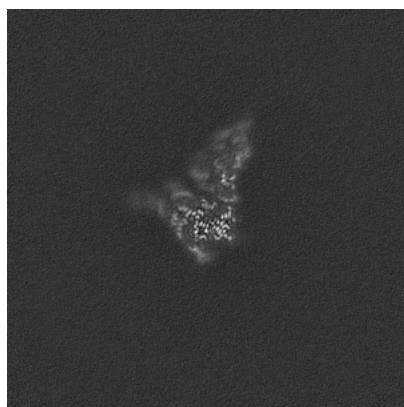

X Index: 200

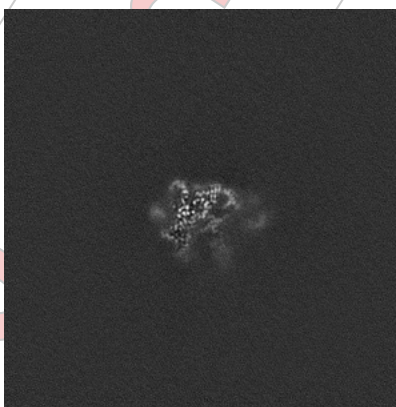

Y Index: 200

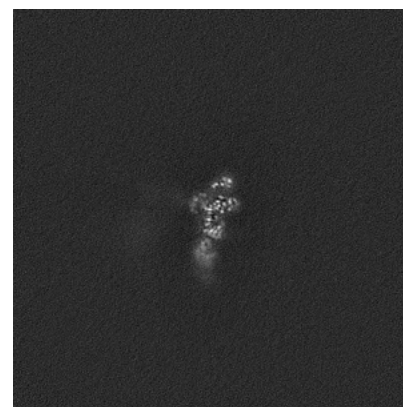

Z Index: 200

The images above show central slices of the map in three orthogonal directions.

## 6.3 Largest variance slices [i](#)

### 6.3.1 Primary map

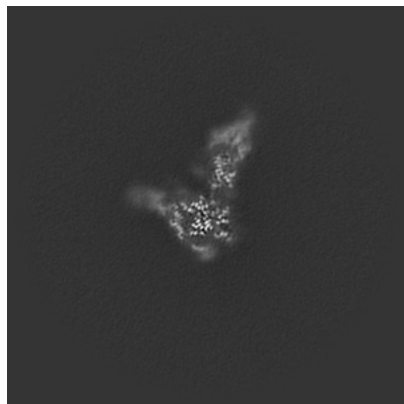

X Index: 195

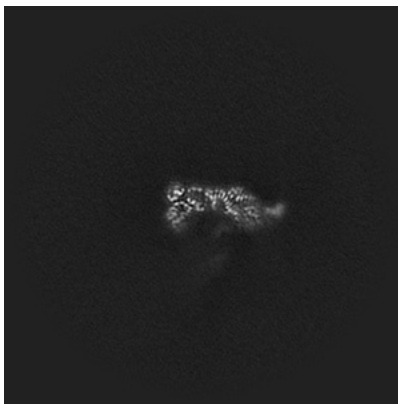

Y Index: 220

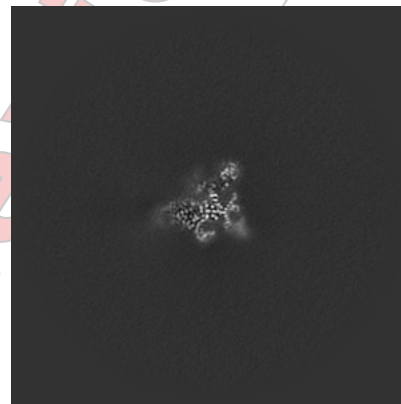

Z Index: 179

### 6.3.2 Raw map

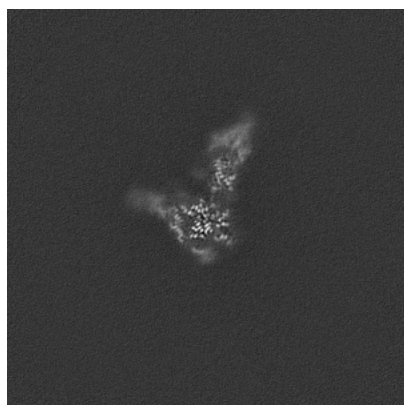

X Index: 195

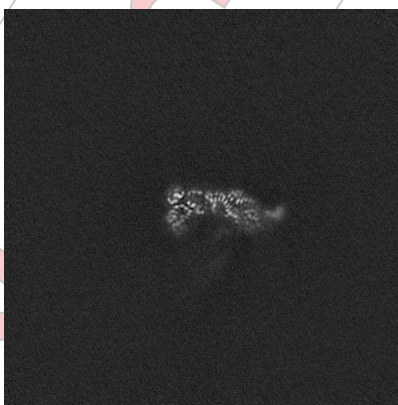

Y Index: 220

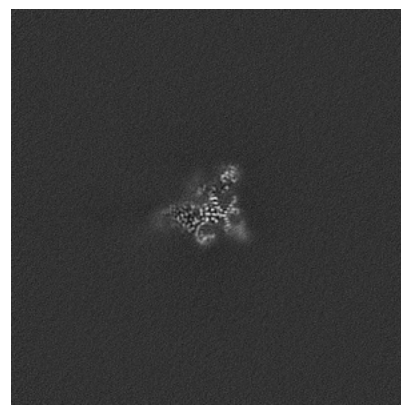

Z Index: 179

The images above show the largest variance slices of the map in three orthogonal directions.

## 6.4 Orthogonal standard-deviation projections (False-color) [i](#)

### 6.4.1 Primary map

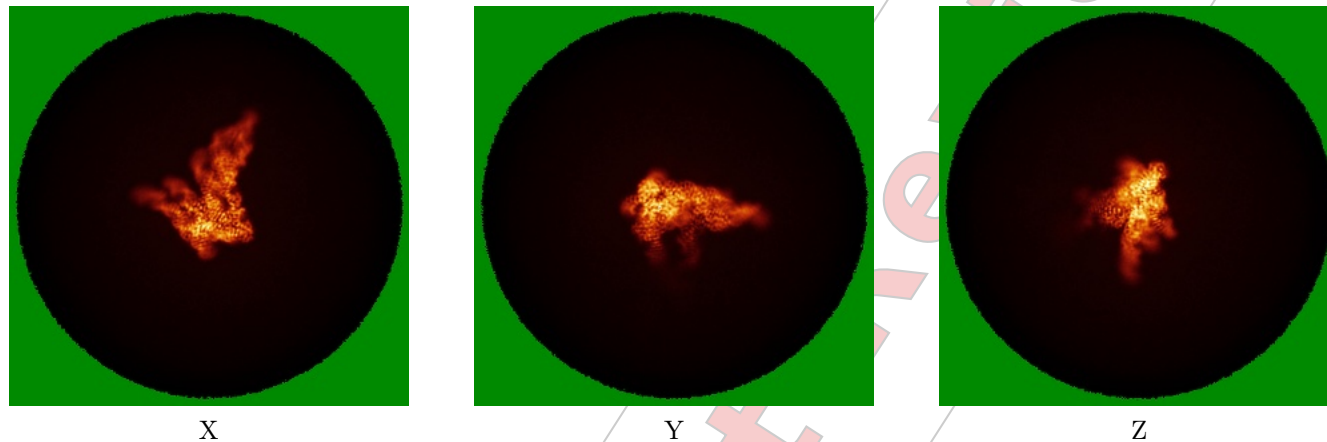

### 6.4.2 Raw map

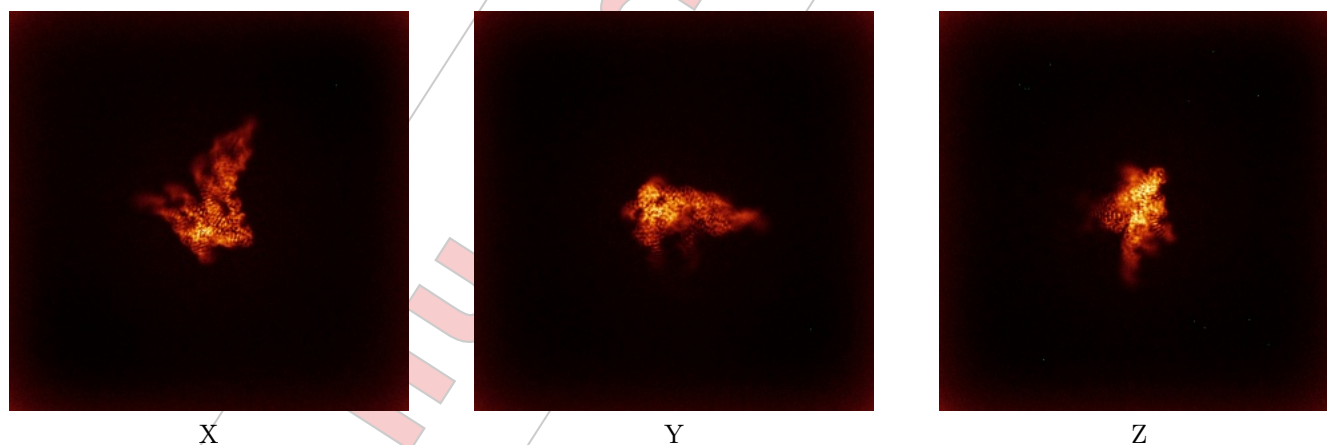

The images above show the map standard deviation projections with false color in three orthogonal directions. Minimum values are shown in green, max in blue, and dark to light orange shades represent small to large values respectively.

## 6.5 Orthogonal surface views [i](#)

### 6.5.1 Primary map

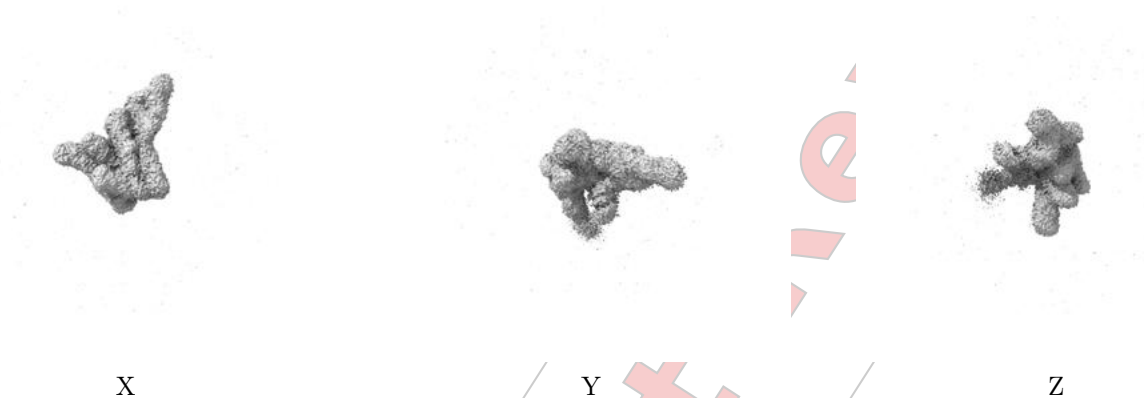

The images above show the 3D surface view of the map at the recommended contour level 0.014. These images, in conjunction with the slice images, may facilitate assessment of whether an appropriate contour level has been provided.

### 6.5.2 Raw map

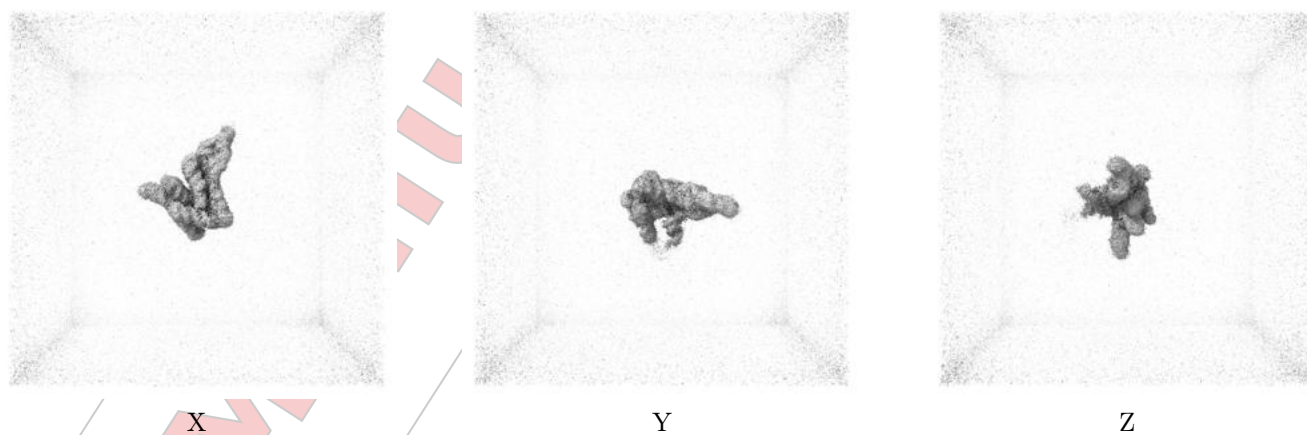

These images show the 3D surface of the raw map. The raw map's contour level was selected so that its surface encloses the same volume as the primary map does at its recommended contour level.

## 6.6 Mask visualisation [i](#)

This section was not generated. No masks/segmentation were deposited.

## 7 Map analysis [i](#)

This section contains the results of statistical analysis of the map.

### 7.1 Map-value distribution [i](#)

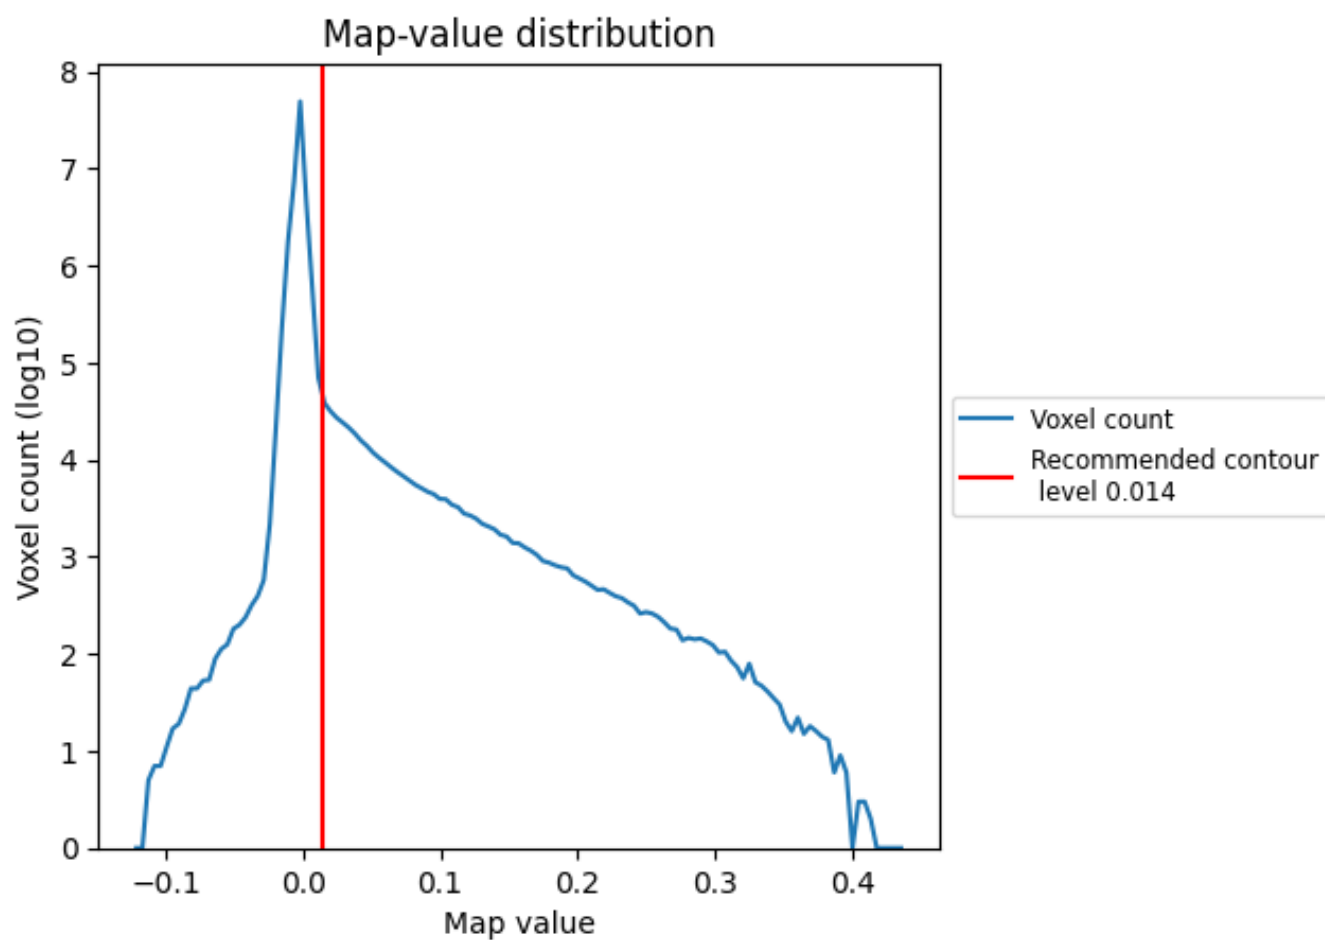

The map-value distribution is plotted in 128 intervals along the x-axis. The y-axis is logarithmic. A spike in this graph at zero usually indicates that the volume has been masked.

## 7.2 Volume estimate [i](#)

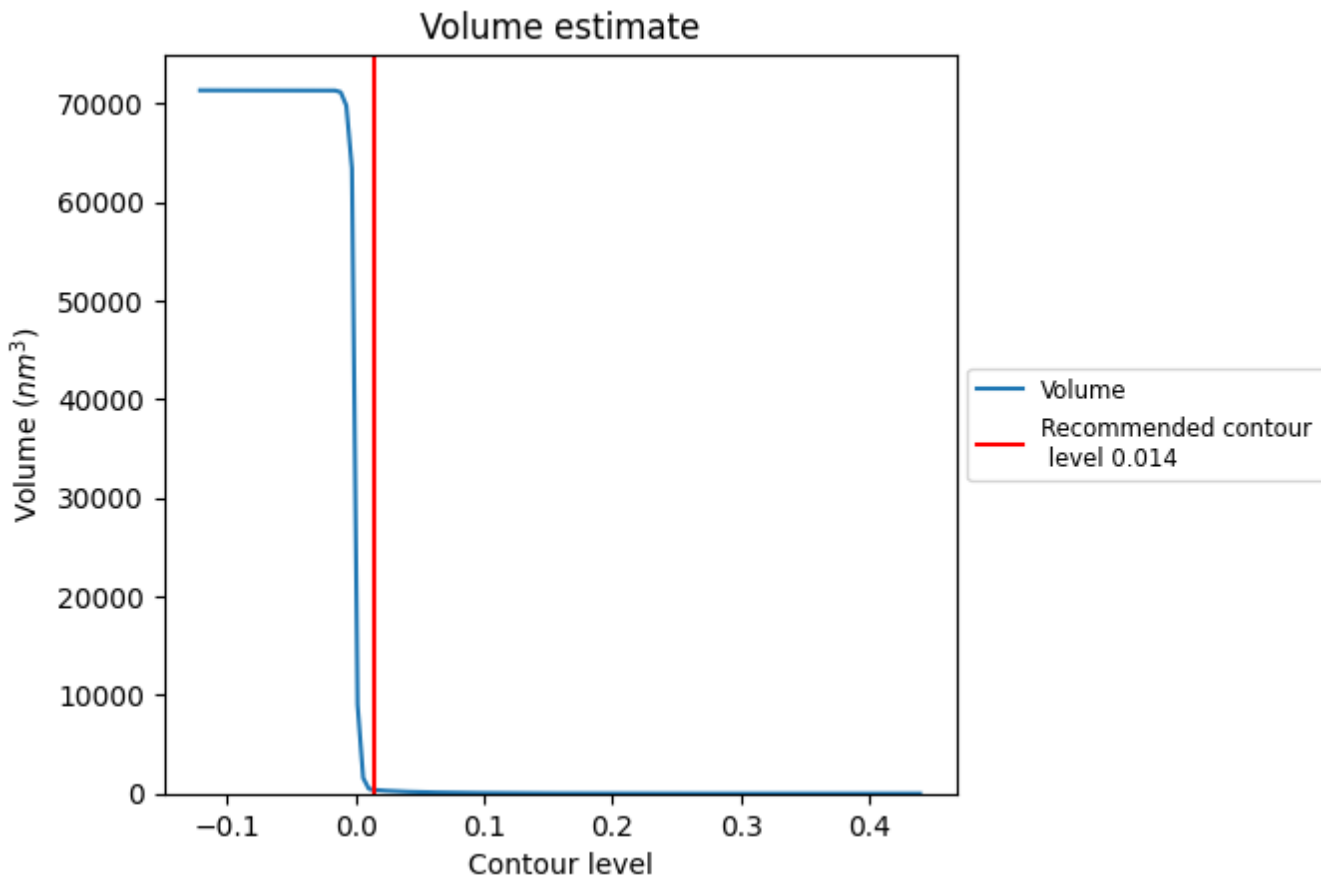

The volume at the recommended contour level is 386  $\text{nm}^3$ ; this corresponds to an approximate mass of 349 kDa.

The volume estimate graph shows how the enclosed volume varies with the contour level. The recommended contour level is shown as a vertical line and the intersection between the line and the curve gives the volume of the enclosed surface at the given level.

7.3 Rotationally averaged power spectrum 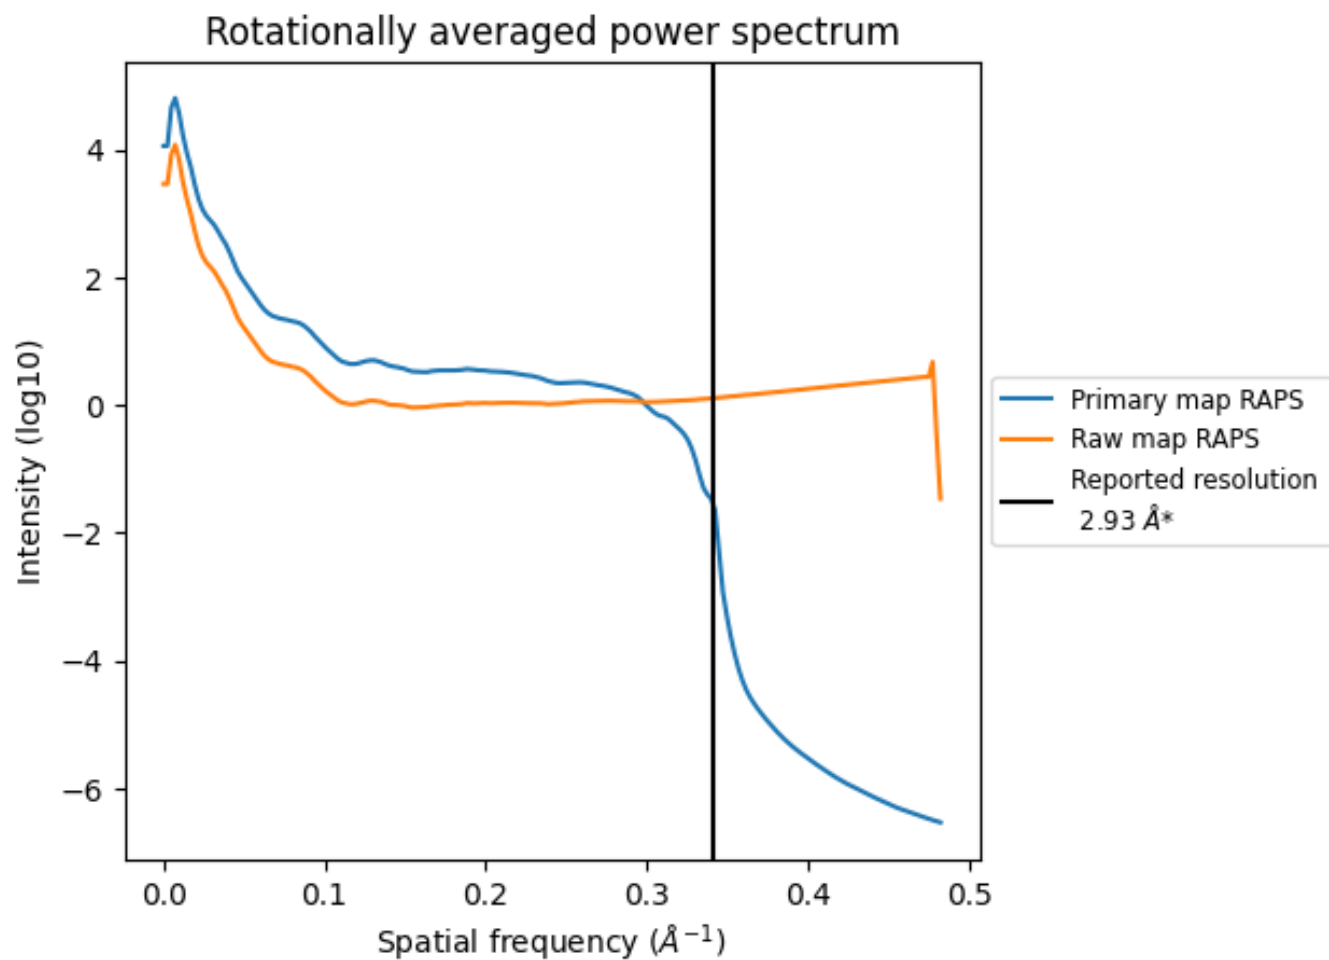

\*Reported resolution corresponds to spatial frequency of 0.341 Å<sup>-1</sup>

## 8 Fourier-Shell correlation [i](#)

Fourier-Shell Correlation (FSC) is the most commonly used method to estimate the resolution of single-particle and subtomogram-averaged maps. The shape of the curve depends on the imposed symmetry, mask and whether or not the two 3D reconstructions used were processed from a common reference. The reported resolution is shown as a black line. A curve is displayed for the half-bit criterion in addition to lines showing the 0.143 gold standard cut-off and 0.5 cut-off.

### 8.1 FSC [i](#)

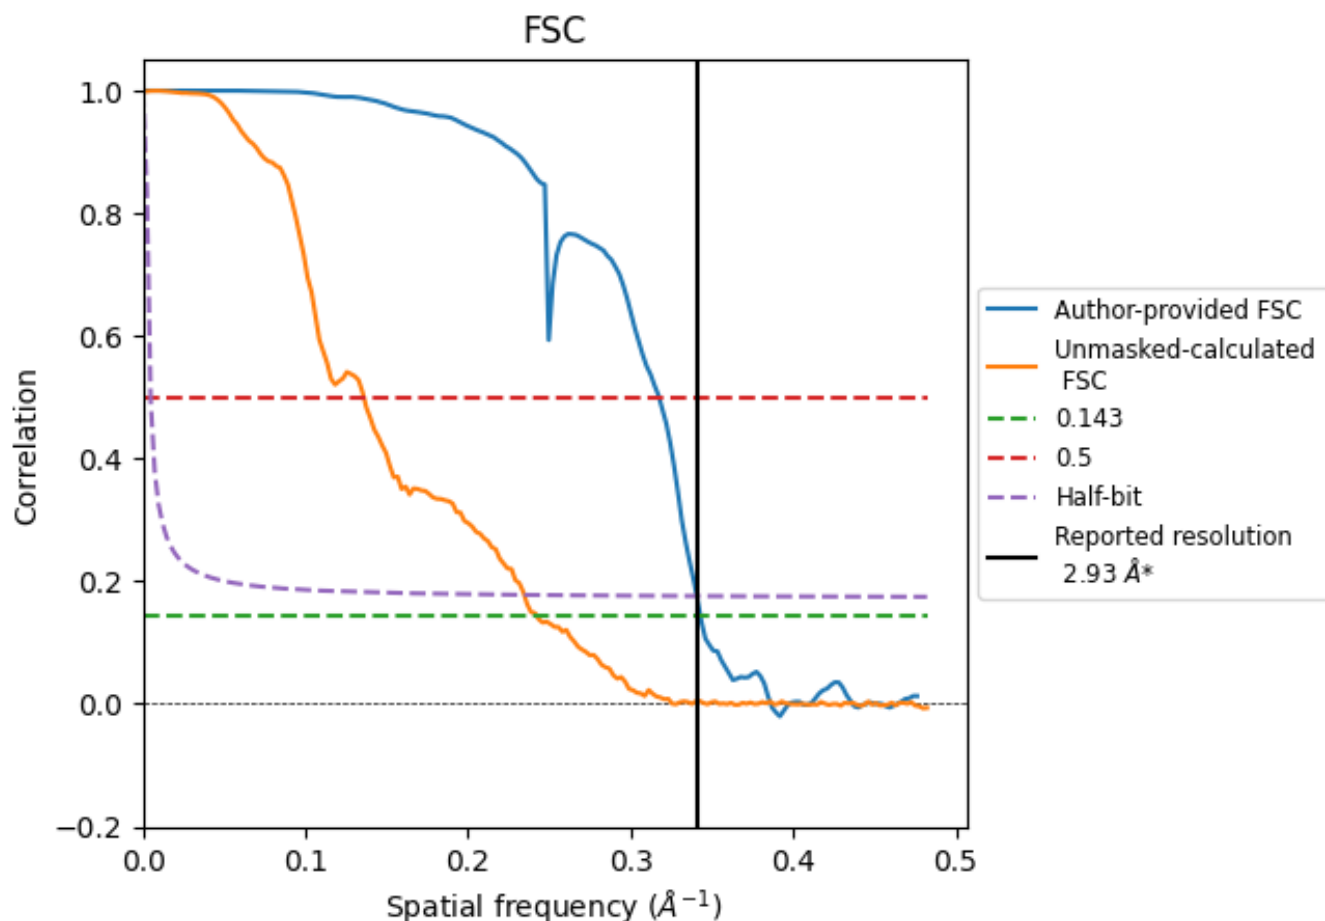

\*Reported resolution corresponds to spatial frequency of 0.341 Å<sup>-1</sup>

## 8.2 Resolution estimates [i](#)

| Resolution estimate (Å)   | Estimation criterion (FSC cut-off) |      |          |
|---------------------------|------------------------------------|------|----------|
|                           | 0.143                              | 0.5  | Half-bit |
| Reported by author        | 2.93                               | -    | -        |
| Author-provided FSC curve | 2.92                               | 3.15 | 2.94     |
| Unmasked-calculated*      | 4.13                               | 7.36 | 4.26     |

\*Resolution estimate based on FSC curve calculated by comparison of deposited half-maps. The value from deposited half-maps intersecting FSC 0.143 CUT-OFF 4.13 differs from the reported value 2.93 by more than 10 %

## 9 Map-model fit [i](#)

This section contains information regarding the fit between EMDB map EMD-70944 and PDB model 9OWU. Per-residue inclusion information can be found in section 3 on page 4.

### 9.1 Map-model overlay [i](#)

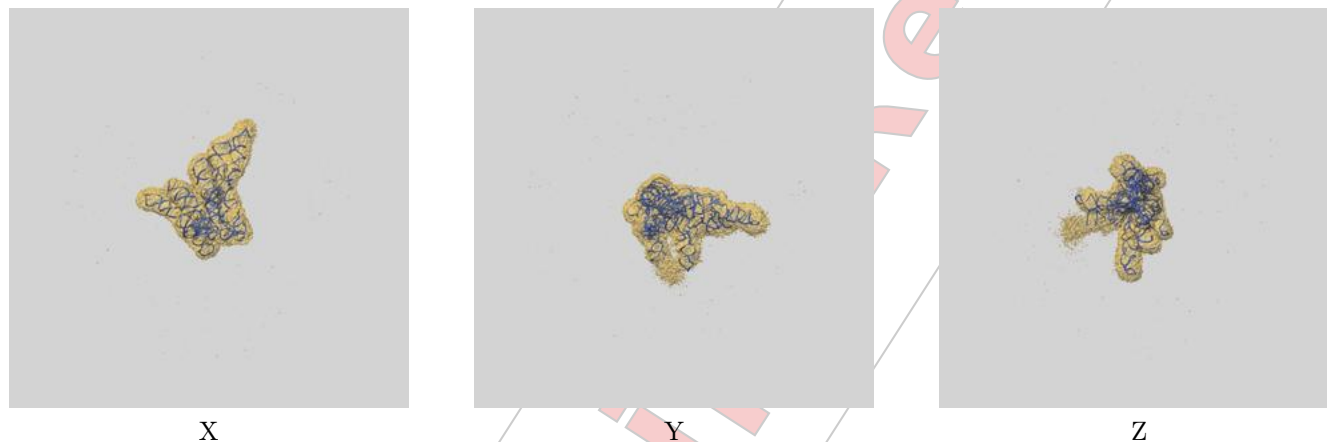

The images above show the 3D surface view of the map at the recommended contour level 0.014 at 50% transparency in yellow overlaid with a ribbon representation of the model coloured in blue. These images allow for the visual assessment of the quality of fit between the atomic model and the map.

## 9.2 Q-score mapped to coordinate model [\(i\)](#)

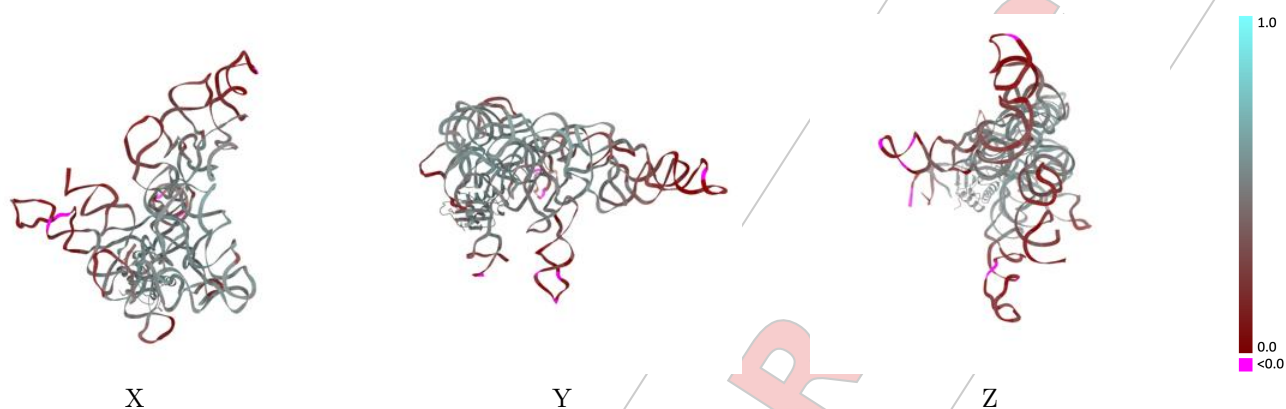

The images above show the model with each residue coloured according to its Q-score. This shows their resolvability in the map with higher Q-score values reflecting better resolvability. Please note: Q-score is calculating the resolvability of atoms, and thus high values are only expected at resolutions at which atoms can be resolved. Low Q-score values may therefore be expected for many entries.

## 9.3 Atom inclusion mapped to coordinate model [\(i\)](#)

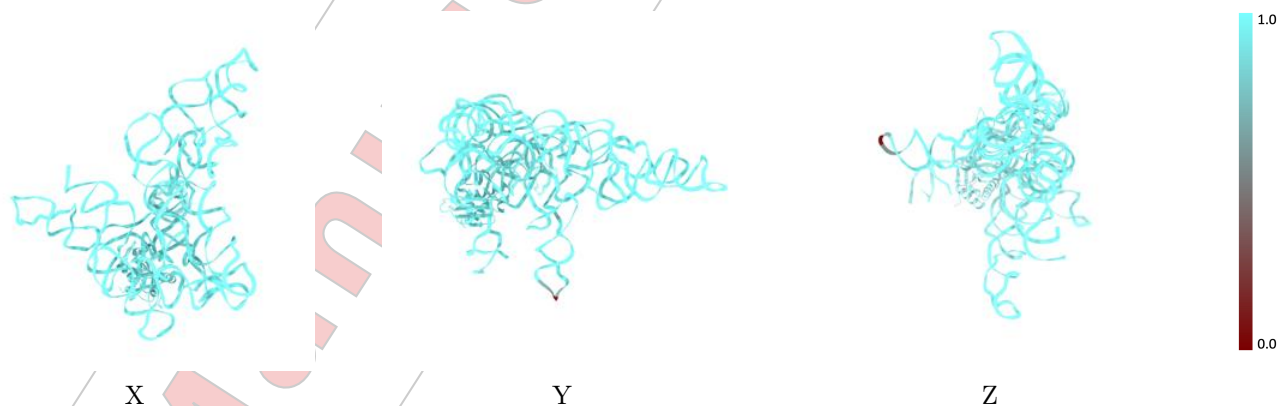

The images above show the model with each residue coloured according to its atom inclusion. This shows to what extent they are inside the map at the recommended contour level (0.014).

## 9.4 Atom inclusion [i](#)

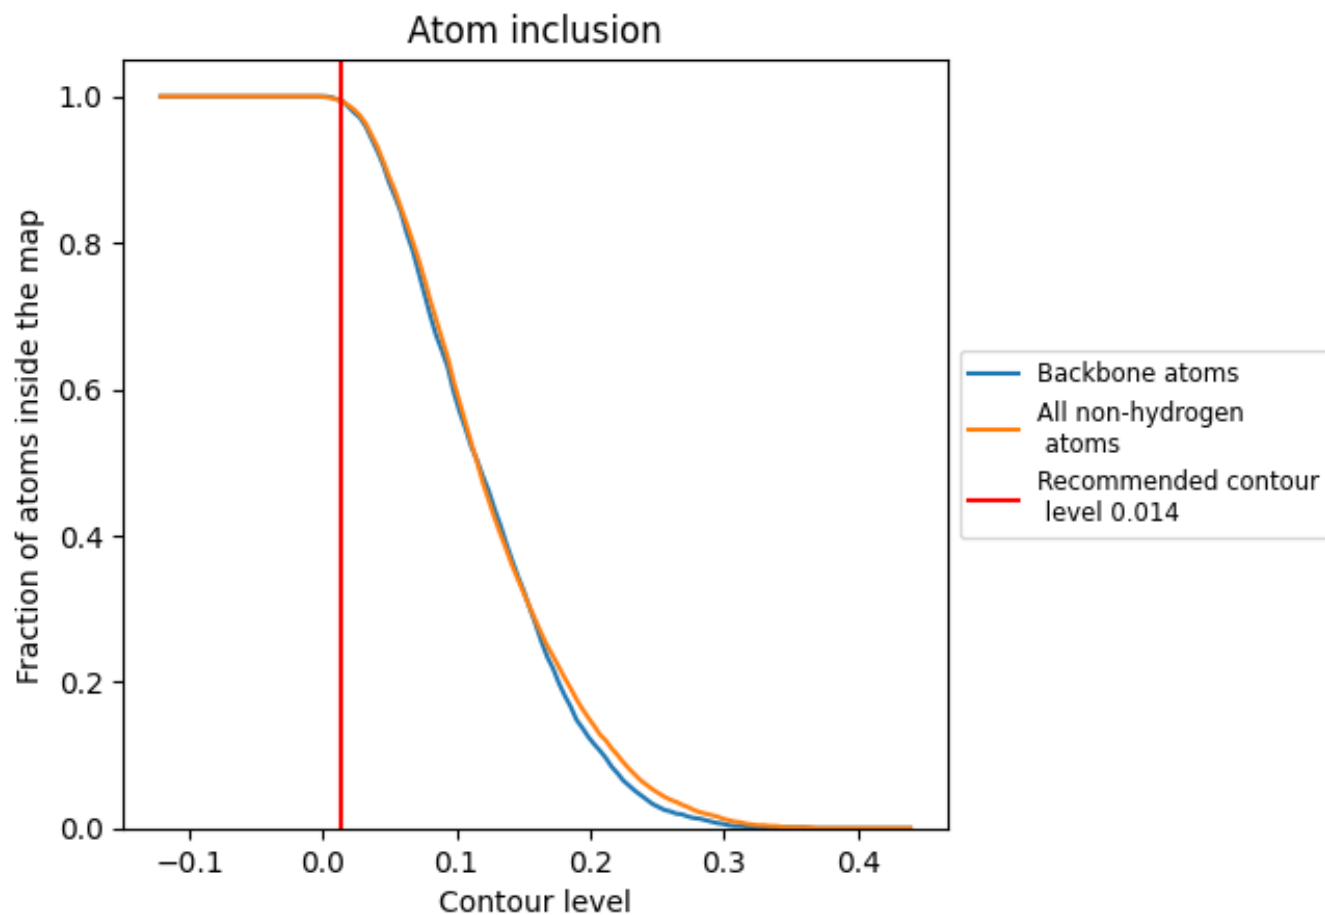

At the recommended contour level, 99% of all backbone atoms, 99% of all non-hydrogen atoms, are inside the map.

## 9.5 Map-model fit summary [i](#)

The table lists the average atom inclusion at the recommended contour level (0.014) and Q-score for the entire model and for each chain.

| Chain | Atom inclusion                                                                           | Q-score                                                                                  |
|-------|------------------------------------------------------------------------------------------|------------------------------------------------------------------------------------------|
| All   |  0.9940 |  0.4020 |
| A     |  1.0000 |  0.4040 |
| B     |  0.9960 |  0.4990 |
| C     |  0.9680 |  0.3590 |
| E     |  0.9520 |  0.2500 |





# Full wwPDB EM Validation Report ⓘ

Jun 4, 2025 – 04:23 PM EDT

PDB ID : 9OWV / pdb\_00009owv  
EMDB ID : EMD-70945  
Title : Structure of Geobacillus stearothermophilus RNase P holoenzyme in complex with mature tRNA in 5 mM Ca<sup>2+</sup>  
Deposited on : 2025-06-02  
Resolution : 3.02 Å (reported)  
Based on initial model : 2A64

**This wwPDB validation report is for manuscript review**

This is a Full wwPDB EM Validation Report.

This report is produced by the wwPDB biocuration pipeline after annotation of the structure.

We welcome your comments at [validation@mail.wwpdb.org](mailto:validation@mail.wwpdb.org)

A user guide is available at

<https://www.wwpdb.org/validation/2017/EMValidationReportHelp>

with specific help available everywhere you see the ⓘ symbol.

The types of validation reports are described at

<http://www.wwpdb.org/validation/2017/FAQs#types>.

---

The following versions of software and data (see [references ⓘ](#)) were used in the production of this report:

EMDB validation analysis : 0.0.1.dev118  
MolProbity : 4-5-2 with Phenix2.0rc1  
Percentile statistics : 20231227.v01 (using entries in the PDB archive December 27th 2023)  
MapQ : 1.9.13  
Ideal geometry (proteins) : Engh & Huber (2001)  
Ideal geometry (DNA, RNA) : Parkinson et al. (1996)  
Validation Pipeline (wwPDB-VP) : 2.43.1

# 1 Overall quality at a glance i

The following experimental techniques were used to determine the structure:  
*ELECTRON MICROSCOPY*

The reported resolution of this entry is 3.02 Å.

Percentile scores (ranging between 0-100) for global validation metrics of the entry are shown in the following graphic. The table shows the number of entries on which the scores are based.

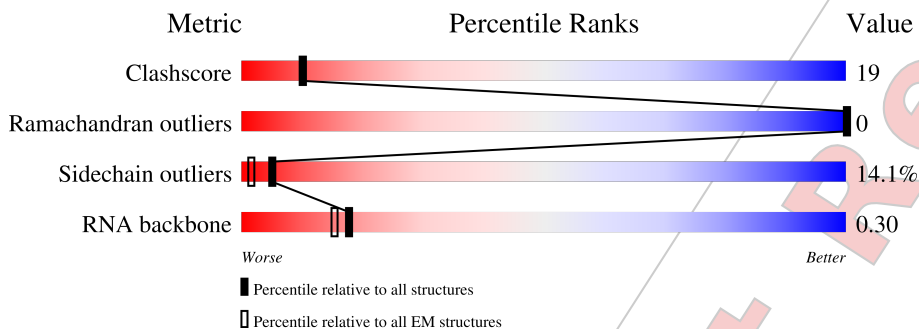

| Metric                | Whole archive (#Entries) | EM structures (#Entries) |
|-----------------------|--------------------------|--------------------------|
| Clashscore            | 210492                   | 15764                    |
| Ramachandran outliers | 207382                   | 16835                    |
| Sidechain outliers    | 206894                   | 16415                    |
| RNA backbone          | 6643                     | 2191                     |

The table below summarises the geometric issues observed across the polymeric chains and their fit to the map. The red, orange, yellow and green segments of the bar indicate the fraction of residues that contain outliers for  $\geq 3$ , 2, 1 and 0 types of geometric quality criteria respectively. A grey segment represents the fraction of residues that are not modelled. The numeric value for each fraction is indicated below the corresponding segment, with a dot representing fractions  $\leq 5\%$ . The upper red bar (where present) indicates the fraction of residues that have poor fit to the EM map (all-atom inclusion  $< 40\%$ ). The numeric value is given above the bar.

| Mol | Chain | Length | Quality of chain |
|-----|-------|--------|------------------|
| 1   | A     | 417    |                  |
| 2   | C     | 78     |                  |
| 3   | B     | 116    |                  |

## 2 Entry composition [i](#)

There are 4 unique types of molecules in this entry. The entry contains 11537 atoms, of which 0 are hydrogens and 0 are deuteriums.

In the tables below, the AltConf column contains the number of residues with at least one atom in alternate conformation and the Trace column contains the number of residues modelled with at most 2 atoms.

- Molecule 1 is a RNA chain called RNase P RNA (417-MER).

| Mol | Chain | Residues | Atoms |      |      |      |     | AltConf | Trace |
|-----|-------|----------|-------|------|------|------|-----|---------|-------|
|     |       |          | Total | C    | N    | O    | P   |         |       |
| 1   | A     | 417      | 8962  | 3996 | 1660 | 2889 | 417 | 0       | 0     |

- Molecule 2 is a RNA chain called mature tRNA (75-MER).

| Mol | Chain | Residues | Atoms |     |     |     |    | AltConf | Trace |
|-----|-------|----------|-------|-----|-----|-----|----|---------|-------|
|     |       |          | Total | C   | N   | O   | P  |         |       |
| 2   | C     | 75       | 1601  | 713 | 285 | 528 | 75 | 0       | 0     |

- Molecule 3 is a protein called Ribonuclease P protein component.

| Mol | Chain | Residues | Atoms |     |     |     |   | AltConf | Trace |
|-----|-------|----------|-------|-----|-----|-----|---|---------|-------|
|     |       |          | Total | C   | N   | O   | S |         |       |
| 3   | B     | 116      | 947   | 608 | 174 | 162 | 3 | 0       | 0     |

There are 2 discrepancies between the modelled and reference sequences:

| Chain | Residue | Modelled | Actual | Comment        | Reference      |
|-------|---------|----------|--------|----------------|----------------|
| B     | 0       | GLY      | -      | expression tag | UNP A0A150N245 |
| B     | 64      | ILE      | VAL    | conflict       | UNP A0A150N245 |

- Molecule 4 is CALCIUM ION (CCD ID: CA) (formula: Ca) (labeled as "Ligand of Interest" by depositor).

| Mol | Chain | Residues | Atoms |    | AltConf |
|-----|-------|----------|-------|----|---------|
| 4   | A     | 24       | Total | Ca | 0       |
|     |       |          | 24    | 24 |         |
| 4   | C     | 3        | Total | Ca | 0       |
|     |       |          | 3     | 3  |         |

### 3 Residue-property plots

These plots are drawn for all protein, RNA, DNA and oligosaccharide chains in the entry. The first graphic for a chain summarises the proportions of the various outlier classes displayed in the second graphic. The second graphic shows the sequence view annotated by issues in geometry and atom inclusion in map density. Residues are color-coded according to the number of geometric quality criteria for which they contain at least one outlier: green = 0, yellow = 1, orange = 2 and red = 3 or more. A red diamond above a residue indicates a poor fit to the EM map for this residue (all-atom inclusion < 40%). Stretches of 2 or more consecutive residues without any outlier are shown as a green connector. Residues present in the sample, but not in the model, are shown in grey.

- Molecule 1: RNase P RNA (417-MER)

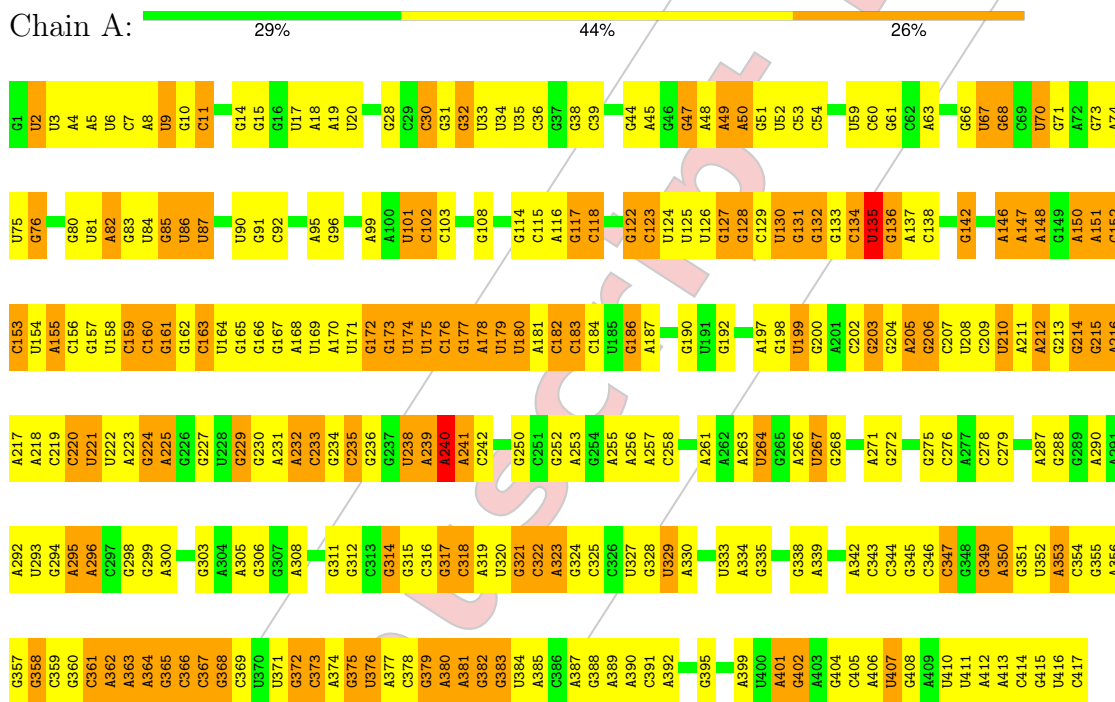

- Molecule 2: mature tRNA (75-MER)

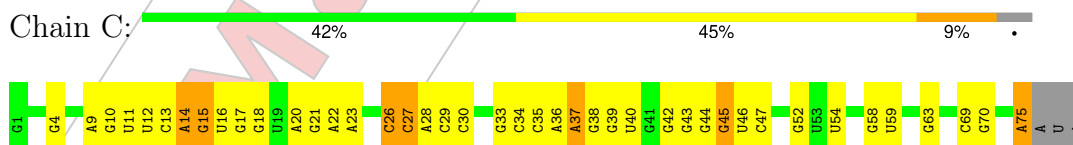

- Molecule 3: Ribonuclease P protein component

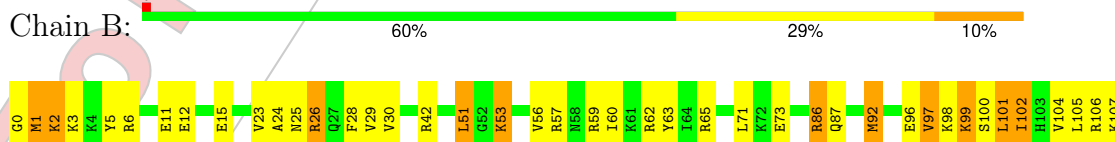

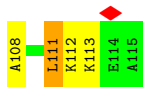

For Manuscript Review

## 4 Experimental information i

| Property                             | Value                                   | Source    |
|--------------------------------------|-----------------------------------------|-----------|
| EM reconstruction method             | SINGLE PARTICLE                         | Depositor |
| Imposed symmetry                     | POINT, Not provided                     |           |
| Number of particles used             | 50839                                   | Depositor |
| Resolution determination method      | FSC 0.143 CUT-OFF                       | Depositor |
| CTF correction method                | PHASE FLIPPING AND AMPLITUDE CORRECTION | Depositor |
| Microscope                           | FEI TALOS ARCTICA                       | Depositor |
| Voltage (kV)                         | 200                                     | Depositor |
| Electron dose ( $e^-/\text{\AA}^2$ ) | 57                                      | Depositor |
| Minimum defocus (nm)                 | 500                                     | Depositor |
| Maximum defocus (nm)                 | 1500                                    | Depositor |
| Magnification                        | Not provided                            |           |
| Image detector                       | GATAN K3 BIOQUANTUM (6k x 4k)           | Depositor |
| Maximum map value                    | 0.515                                   | Depositor |
| Minimum map value                    | -0.140                                  | Depositor |
| Average map value                    | 0.000                                   | Depositor |
| Map value standard deviation         | 0.008                                   | Depositor |
| Recommended contour level            | 0.03                                    | Depositor |
| Map size (Å)                         | 414.72, 414.72, 414.72                  | wwPDB     |
| Map dimensions                       | 400, 400, 400                           | wwPDB     |
| Map angles (°)                       | 90.0, 90.0, 90.0                        | wwPDB     |
| Pixel spacing (Å)                    | 1.0368, 1.0368, 1.0368                  | Depositor |

## 5 Model quality (i)

### 5.1 Standard geometry (i)

Bond lengths and bond angles in the following residue types are not validated in this section: CA

The Z score for a bond length (or angle) is the number of standard deviations the observed value is removed from the expected value. A bond length (or angle) with  $|Z| > 5$  is considered an outlier worth inspection. RMSZ is the root-mean-square of all Z scores of the bond lengths (or angles).

| Mol | Chain | Bond lengths |         | Bond angles |                |
|-----|-------|--------------|---------|-------------|----------------|
|     |       | RMSZ         | # Z  >5 | RMSZ        | # Z  >5        |
| 1   | A     | 0.55         | 0/10038 | 0.89        | 7/15661 (0.0%) |
| 2   | C     | 0.45         | 0/1788  | 0.68        | 1/2786 (0.0%)  |
| 3   | B     | 0.54         | 0/962   | 0.84        | 0/1281         |
| All | All   | 0.54         | 0/12788 | 0.86        | 8/19728 (0.0%) |

Chiral center outliers are detected by calculating the chiral volume of a chiral center and verifying if the center is modelled as a planar moiety or with the opposite hand. A planarity outlier is detected by checking planarity of atoms in a peptide group, atoms in a mainchain group or atoms of a sidechain that are expected to be planar.

| Mol | Chain | #Chirality outliers | #Planarity outliers |
|-----|-------|---------------------|---------------------|
| 3   | B     | 0                   | 4                   |

There are no bond length outliers.

All (8) bond angle outliers are listed below:

| Mol | Chain | Res | Type | Atoms       | Z     | Observed(°) | Ideal(°) |
|-----|-------|-----|------|-------------|-------|-------------|----------|
| 1   | A     | 240 | A    | C2'-C3'-O3' | -7.05 | 103.13      | 113.70   |
| 2   | C     | 63  | G    | O3'-P-O5'   | -6.88 | 93.68       | 104.00   |
| 1   | A     | 49  | A    | O3'-P-O5'   | -6.45 | 94.33       | 104.00   |
| 1   | A     | 108 | G    | O3'-P-O5'   | -5.96 | 95.07       | 104.00   |
| 1   | A     | 258 | C    | C1'-C2'-O2' | -5.62 | 99.98       | 108.40   |
| 1   | A     | 84  | U    | O3'-P-O5'   | -5.48 | 95.78       | 104.00   |
| 1   | A     | 135 | U    | O3'-P-O5'   | 5.37  | 112.05      | 104.00   |
| 1   | A     | 328 | G    | O3'-P-O5'   | -5.07 | 96.40       | 104.00   |

There are no chirality outliers.

All (4) planarity outliers are listed below:

| Mol | Chain | Res | Type | Group     |
|-----|-------|-----|------|-----------|
| 3   | B     | 106 | ARG  | Sidechain |
| 3   | B     | 26  | ARG  | Sidechain |
| 3   | B     | 59  | ARG  | Sidechain |
| 3   | B     | 86  | ARG  | Sidechain |

## 5.2 Too-close contacts [i](#)

In the following table, the Non-H and H(model) columns list the number of non-hydrogen atoms and hydrogen atoms in the chain respectively. The H(added) column lists the number of hydrogen atoms added and optimized by MolProbity. The Clashes column lists the number of clashes within the asymmetric unit, whereas Symm-Clashes lists symmetry-related clashes.

| Mol | Chain | Non-H | H(model) | H(added) | Clashes | Symm-Clashes |
|-----|-------|-------|----------|----------|---------|--------------|
| 1   | A     | 8962  | 0        | 4510     | 262     | 0            |
| 2   | C     | 1601  | 0        | 810      | 23      | 0            |
| 3   | B     | 947   | 0        | 1008     | 35      | 0            |
| 4   | A     | 24    | 0        | 0        | 0       | 0            |
| 4   | C     | 3     | 0        | 0        | 0       | 0            |
| All | All   | 11537 | 0        | 6328     | 311     | 0            |

The all-atom clashscore is defined as the number of clashes found per 1000 atoms (including hydrogen atoms). The all-atom clashscore for this structure is 19.

All (311) close contacts within the same asymmetric unit are listed below, sorted by their clash magnitude.

| Atom-1         | Atom-2         | Interatomic distance (Å) | Clash overlap (Å) |
|----------------|----------------|--------------------------|-------------------|
| 1:A:364:A:C4   | 1:A:365:G:H1'  | 1.96                     | 1.01              |
| 1:A:371:U:H5'' | 1:A:372:G:H5'  | 1.54                     | 0.87              |
| 1:A:349:G:H21  | 1:A:350:A:H62  | 1.24                     | 0.85              |
| 1:A:135:U:H3'  | 1:A:136:G:H5'' | 1.60                     | 0.83              |
| 1:A:363:A:H2'  | 1:A:364:A:C4   | 2.13                     | 0.82              |
| 1:A:367:C:H2'  | 1:A:368:G:C8   | 2.15                     | 0.81              |
| 1:A:222:U:H2'  | 1:A:223:A:H8   | 1.48                     | 0.78              |
| 1:A:378:C:H3'  | 1:A:379:G:C8   | 2.19                     | 0.78              |
| 1:A:174:U:H2'  | 1:A:175:U:C6   | 2.20                     | 0.77              |
| 1:A:127:G:H2'  | 1:A:128:G:H4'  | 1.66                     | 0.76              |
| 1:A:219:C:H2'  | 1:A:220:C:C6   | 2.20                     | 0.75              |
| 1:A:160:C:H1'  | 1:A:167:G:H22  | 1.50                     | 0.74              |
| 1:A:222:U:H2'  | 1:A:223:A:C8   | 2.22                     | 0.74              |
| 1:A:219:C:H2'  | 1:A:220:C:H6   | 1.53                     | 0.73              |
| 1:A:215:G:H1'  | 1:A:218:A:N6   | 2.03                     | 0.73              |

*Continued on next page...*

Continued from previous page...

| Atom-1          | Atom-2           | Interatomic distance (Å) | Clash overlap (Å) |
|-----------------|------------------|--------------------------|-------------------|
| 1:A:45:A:C2     | 1:A:388:G:H2'    | 2.24                     | 0.73              |
| 1:A:180:U:H2'   | 1:A:181:A:H8     | 1.55                     | 0.71              |
| 3:B:63:TYR:HB3  | 3:B:97:VAL:HG11  | 1.72                     | 0.71              |
| 1:A:9:U:H2'     | 1:A:10:G:H8      | 1.57                     | 0.70              |
| 1:A:364:A:C5    | 1:A:365:G:H1'    | 2.27                     | 0.69              |
| 1:A:45:A:H62    | 3:B:62:ARG:NH2   | 1.90                     | 0.69              |
| 1:A:363:A:C8    | 1:A:363:A:H5''   | 2.28                     | 0.68              |
| 3:B:0:GLY:HA3   | 3:B:65:ARG:HB3   | 1.75                     | 0.68              |
| 1:A:349:G:H22   | 1:A:379:G:H1'    | 1.58                     | 0.68              |
| 1:A:234:G:H3'   | 1:A:235:C:H4'    | 1.76                     | 0.68              |
| 2:C:27:C:H2'    | 2:C:28:A:C8      | 2.30                     | 0.67              |
| 1:A:364:A:H3'   | 1:A:365:G:O4'    | 1.95                     | 0.66              |
| 1:A:378:C:H3'   | 1:A:379:G:H8     | 1.59                     | 0.66              |
| 2:C:27:C:H2'    | 2:C:28:A:H8      | 1.60                     | 0.66              |
| 1:A:350:A:H1'   | 1:A:380:A:C2     | 2.31                     | 0.65              |
| 1:A:174:U:H2'   | 1:A:175:U:H6     | 1.60                     | 0.65              |
| 1:A:349:G:N2    | 1:A:379:G:H1'    | 2.10                     | 0.65              |
| 3:B:30:VAL:HG21 | 3:B:105:LEU:HD12 | 1.79                     | 0.65              |
| 1:A:374:A:H2'   | 1:A:375:G:C8     | 2.32                     | 0.65              |
| 1:A:18:A:H2'    | 1:A:19:A:H8      | 1.62                     | 0.65              |
| 1:A:363:A:O3'   | 1:A:364:A:O4'    | 2.15                     | 0.65              |
| 3:B:51:LEU:HD11 | 3:B:86:ARG:O     | 1.97                     | 0.65              |
| 1:A:349:G:N2    | 1:A:350:A:H62    | 1.93                     | 0.63              |
| 1:A:147:A:H8    | 1:A:178:A:H62    | 1.45                     | 0.63              |
| 1:A:314:G:H22   | 1:A:323:A:H2     | 1.43                     | 0.62              |
| 3:B:56:VAL:O    | 3:B:60:ILE:HG13  | 1.99                     | 0.61              |
| 1:A:316:C:H2'   | 1:A:317:G:C8     | 2.35                     | 0.61              |
| 1:A:174:U:H5''  | 1:A:220:C:P      | 2.40                     | 0.61              |
| 1:A:167:G:H2'   | 1:A:168:A:C8     | 2.36                     | 0.61              |
| 1:A:173:G:O2'   | 1:A:174:U:H5'    | 2.00                     | 0.60              |
| 1:A:18:A:H2'    | 1:A:19:A:C8      | 2.37                     | 0.60              |
| 1:A:238:U:H4'   | 2:C:54:U:H5''    | 1.82                     | 0.60              |
| 1:A:232:A:H1'   | 1:A:233:C:H5     | 1.67                     | 0.60              |
| 1:A:3:U:H2'     | 1:A:4:A:C8       | 2.36                     | 0.60              |
| 1:A:350:A:H1'   | 1:A:380:A:N1     | 2.17                     | 0.60              |
| 3:B:12:GLU:HG2  | 3:B:42:ARG:HH22  | 1.67                     | 0.59              |
| 1:A:3:U:H2'     | 1:A:4:A:H8       | 1.67                     | 0.59              |
| 1:A:130:U:H2'   | 1:A:131:G:C8     | 2.38                     | 0.59              |
| 1:A:165:G:H2'   | 1:A:166:G:C8     | 2.37                     | 0.59              |
| 1:A:148:A:N6    | 1:A:177:G:H1'    | 2.17                     | 0.59              |
| 1:A:379:G:H4'   | 1:A:380:A:H8     | 1.66                     | 0.59              |

Continued on next page...

Continued from previous page...

| Atom-1          | Atom-2          | Interatomic distance (Å) | Clash overlap (Å) |
|-----------------|-----------------|--------------------------|-------------------|
| 1:A:32:G:H22    | 1:A:34:U:H1'    | 1.68                     | 0.58              |
| 1:A:147:A:H8    | 1:A:178:A:N6    | 2.01                     | 0.58              |
| 1:A:379:G:H4'   | 1:A:380:A:C8    | 2.37                     | 0.58              |
| 1:A:360:G:H22   | 1:A:363:A:H5''  | 1.68                     | 0.58              |
| 1:A:360:G:N2    | 1:A:363:A:H5''  | 2.19                     | 0.58              |
| 1:A:148:A:N6    | 1:A:177:G:O2'   | 2.36                     | 0.57              |
| 1:A:10:G:H2'    | 1:A:11:C:H6     | 1.70                     | 0.57              |
| 1:A:6:U:H2'     | 1:A:7:C:C6      | 2.40                     | 0.57              |
| 1:A:315:G:H2'   | 1:A:316:C:C6    | 2.40                     | 0.57              |
| 1:A:2:U:H2'     | 1:A:3:U:C6      | 2.40                     | 0.56              |
| 1:A:4:A:H2'     | 1:A:5:A:H8      | 1.70                     | 0.56              |
| 1:A:9:U:H2'     | 1:A:10:G:C8     | 2.39                     | 0.56              |
| 1:A:215:G:O3'   | 1:A:216:A:H8    | 1.88                     | 0.56              |
| 1:A:364:A:OP1   | 1:A:365:G:N7    | 2.36                     | 0.56              |
| 3:B:23:VAL:HG21 | 3:B:108:ALA:HA  | 1.87                     | 0.56              |
| 1:A:199:U:C5    | 1:A:206:G:H1'   | 2.41                     | 0.56              |
| 1:A:14:G:H2'    | 1:A:385:A:N1    | 2.21                     | 0.56              |
| 1:A:45:A:H62    | 3:B:62:ARG:HH22 | 1.54                     | 0.56              |
| 1:A:152:C:O2    | 1:A:173:G:N1    | 2.37                     | 0.56              |
| 2:C:14:A:H3'    | 2:C:15:G:H8     | 1.70                     | 0.56              |
| 1:A:199:U:H5    | 1:A:206:G:H1'   | 1.71                     | 0.56              |
| 3:B:92:MET:HB3  | 3:B:97:VAL:HG23 | 1.88                     | 0.56              |
| 1:A:364:A:H3'   | 1:A:364:A:OP2   | 2.05                     | 0.55              |
| 2:C:26:C:H1'    | 2:C:43:G:H22    | 1.72                     | 0.55              |
| 1:A:360:G:H22   | 1:A:363:A:C5'   | 2.19                     | 0.55              |
| 1:A:47:G:H1     | 1:A:385:A:H62   | 1.55                     | 0.55              |
| 1:A:5:A:H2'     | 1:A:6:U:H6      | 1.72                     | 0.55              |
| 1:A:59:U:H2'    | 1:A:60:C:C6     | 2.42                     | 0.55              |
| 1:A:7:C:H2'     | 1:A:8:A:H8      | 1.72                     | 0.55              |
| 1:A:85:G:O2'    | 1:A:87:U:O4     | 2.23                     | 0.55              |
| 1:A:221:U:H2'   | 1:A:222:U:C6    | 2.42                     | 0.54              |
| 1:A:287:A:H2'   | 1:A:288:G:O4'   | 2.08                     | 0.54              |
| 1:A:414:C:H2'   | 1:A:415:G:H8    | 1.72                     | 0.54              |
| 1:A:212:A:H2'   | 1:A:213:G:O4'   | 2.07                     | 0.54              |
| 2:C:28:A:H2'    | 2:C:29:C:O4'    | 2.06                     | 0.54              |
| 1:A:215:G:H2'   | 1:A:216:A:O2'   | 2.06                     | 0.54              |
| 1:A:412:A:H2'   | 1:A:413:A:C8    | 2.41                     | 0.54              |
| 3:B:23:VAL:HG11 | 3:B:107:LYS:O   | 2.07                     | 0.54              |
| 1:A:5:A:H2'     | 1:A:6:U:C6      | 2.42                     | 0.54              |
| 1:A:214:G:H3'   | 1:A:215:G:H8    | 1.72                     | 0.54              |
| 1:A:220:C:H2'   | 1:A:221:U:C6    | 2.42                     | 0.54              |

Continued on next page...

Continued from previous page...

| Atom-1         | Atom-2          | Interatomic distance (Å) | Clash overlap (Å) |
|----------------|-----------------|--------------------------|-------------------|
| 1:A:71:G:O2'   | 1:A:73:G:N7     | 2.31                     | 0.53              |
| 1:A:4:A:H2'    | 1:A:5:A:C8      | 2.44                     | 0.53              |
| 1:A:364:A:C3'  | 1:A:365:G:O4'   | 2.56                     | 0.52              |
| 1:A:170:A:C2   | 1:A:171:U:H1'   | 2.44                     | 0.52              |
| 1:A:349:G:O6   | 1:A:379:G:N2    | 2.42                     | 0.52              |
| 1:A:387:A:OP1  | 3:B:53:LYS:HD3  | 2.10                     | 0.52              |
| 1:A:290:A:C2   | 1:A:295:A:C5    | 2.98                     | 0.52              |
| 1:A:6:U:H2'    | 1:A:7:C:H6      | 1.74                     | 0.52              |
| 1:A:85:G:H1'   | 1:A:86:U:H5     | 1.75                     | 0.52              |
| 1:A:168:A:H2'  | 1:A:169:U:C6    | 2.44                     | 0.52              |
| 1:A:363:A:H5'' | 1:A:363:A:H8    | 1.74                     | 0.52              |
| 1:A:122:G:H3'  | 1:A:123:C:H5''  | 1.90                     | 0.51              |
| 1:A:124:U:H2'  | 1:A:125:U:O4'   | 2.11                     | 0.51              |
| 3:B:23:VAL:HB  | 3:B:108:ALA:HB2 | 1.92                     | 0.51              |
| 1:A:70:U:H2'   | 1:A:71:G:O4'    | 2.10                     | 0.51              |
| 1:A:54:C:C2    | 1:A:395:G:C2    | 2.98                     | 0.51              |
| 1:A:155:A:N6   | 1:A:168:A:N7    | 2.58                     | 0.51              |
| 1:A:240:A:H2   | 2:C:52:G:N3     | 2.09                     | 0.51              |
| 2:C:37:A:H2'   | 2:C:38:G:C8     | 2.46                     | 0.51              |
| 1:A:147:A:H5'' | 1:A:177:G:H22   | 1.75                     | 0.51              |
| 1:A:401:A:H2'  | 1:A:402:G:O4'   | 2.11                     | 0.51              |
| 1:A:174:U:C5'  | 1:A:220:C:H5'   | 2.41                     | 0.51              |
| 1:A:183:C:H2'  | 1:A:184:C:C6    | 2.46                     | 0.51              |
| 1:A:361:C:O2'  | 1:A:362:A:H3'   | 2.12                     | 0.51              |
| 2:C:26:C:H1'   | 2:C:43:G:N2     | 2.26                     | 0.51              |
| 1:A:317:G:N1   | 1:A:321:G:C2    | 2.79                     | 0.50              |
| 1:A:71:G:N2    | 1:A:73:G:H3'    | 2.26                     | 0.50              |
| 1:A:142:G:H4'  | 1:A:142:G:OP1   | 2.10                     | 0.50              |
| 1:A:153:C:H2'  | 1:A:154:U:C2    | 2.46                     | 0.50              |
| 1:A:186:G:H8   | 1:A:186:G:H5''  | 1.77                     | 0.50              |
| 1:A:363:A:O2'  | 1:A:364:A:C1'   | 2.60                     | 0.50              |
| 1:A:156:C:N4   | 1:A:169:U:O4    | 2.44                     | 0.50              |
| 1:A:373:C:H2'  | 1:A:374:A:C8    | 2.47                     | 0.50              |
| 1:A:10:G:H2'   | 1:A:11:C:C6     | 2.47                     | 0.50              |
| 1:A:128:G:H2'  | 1:A:129:C:C6    | 2.46                     | 0.50              |
| 1:A:356:A:H3'  | 1:A:357:G:H8    | 1.77                     | 0.50              |
| 1:A:344:C:H2'  | 1:A:345:G:C8    | 2.47                     | 0.50              |
| 1:A:349:G:H4'  | 1:A:350:A:H5'   | 1.94                     | 0.50              |
| 1:A:388:G:OP2  | 3:B:53:LYS:HB2  | 2.12                     | 0.49              |
| 1:A:161:G:H4'  | 1:A:163:C:C5    | 2.48                     | 0.49              |
| 1:A:203:G:C5   | 1:A:205:A:H1'   | 2.47                     | 0.49              |

Continued on next page...

Continued from previous page...

| Atom-1          | Atom-2         | Interatomic distance (Å) | Clash overlap (Å) |
|-----------------|----------------|--------------------------|-------------------|
| 1:A:221:U:H2'   | 1:A:222:U:H6   | 1.77                     | 0.49              |
| 1:A:216:A:O2'   | 1:A:217:A:H8   | 1.96                     | 0.49              |
| 1:A:182:C:H2'   | 1:A:183:C:C6   | 2.48                     | 0.48              |
| 2:C:42:G:H2'    | 2:C:43:G:C8    | 2.48                     | 0.48              |
| 1:A:150:A:H2'   | 1:A:151:A:C8   | 2.48                     | 0.48              |
| 1:A:169:U:H2'   | 1:A:170:A:H8   | 1.78                     | 0.48              |
| 1:A:338:G:H2'   | 1:A:339:A:C8   | 2.49                     | 0.48              |
| 1:A:364:A:OP2   | 1:A:365:G:O4'  | 2.21                     | 0.48              |
| 1:A:130:U:H2'   | 1:A:131:G:H8   | 1.78                     | 0.48              |
| 1:A:132:G:H3'   | 1:A:133:G:H8   | 1.79                     | 0.48              |
| 3:B:23:VAL:HG11 | 3:B:107:LYS:C  | 2.38                     | 0.48              |
| 1:A:171:U:O2    | 1:A:216:A:N6   | 2.46                     | 0.48              |
| 1:A:174:U:H5''  | 1:A:219:C:O3'  | 2.13                     | 0.48              |
| 2:C:69:C:H2'    | 2:C:70:G:C8    | 2.48                     | 0.48              |
| 1:A:19:A:H2'    | 1:A:20:U:C6    | 2.48                     | 0.48              |
| 1:A:30:C:H2'    | 1:A:31:G:C8    | 2.49                     | 0.48              |
| 1:A:82:A:H2'    | 1:A:83:G:O4'   | 2.13                     | 0.48              |
| 1:A:115:C:H2'   | 1:A:116:A:C8   | 2.48                     | 0.48              |
| 1:A:354:C:H2'   | 1:A:355:G:C8   | 2.49                     | 0.48              |
| 1:A:411:U:H2'   | 1:A:412:A:C8   | 2.48                     | 0.48              |
| 2:C:26:C:H2'    | 2:C:27:C:C6    | 2.49                     | 0.48              |
| 1:A:71:G:H1'    | 1:A:295:A:H2   | 1.78                     | 0.48              |
| 1:A:371:U:H4'   | 1:A:373:C:H5   | 1.79                     | 0.48              |
| 1:A:177:G:H3'   | 1:A:178:A:C8   | 2.49                     | 0.47              |
| 1:A:347:C:H1'   | 1:A:383:G:N2   | 2.29                     | 0.47              |
| 1:A:360:G:H1'   | 1:A:365:G:N2   | 2.29                     | 0.47              |
| 3:B:96:GLU:O    | 3:B:99:LYS:N   | 2.47                     | 0.47              |
| 1:A:7:C:H2'     | 1:A:8:A:C8     | 2.49                     | 0.47              |
| 1:A:172:G:C4    | 1:A:173:G:C8   | 3.03                     | 0.47              |
| 2:C:14:A:H3'    | 2:C:15:G:C8    | 2.50                     | 0.47              |
| 3:B:112:LYS:O   | 3:B:113:LYS:C  | 2.58                     | 0.47              |
| 1:A:176:C:H2'   | 1:A:177:G:C8   | 2.50                     | 0.47              |
| 1:A:376:U:H2'   | 1:A:377:A:C8   | 2.49                     | 0.47              |
| 1:A:267:U:C2    | 2:C:75:A:C2    | 3.02                     | 0.47              |
| 1:A:293:U:H2'   | 1:A:294:G:O4'  | 2.15                     | 0.47              |
| 1:A:350:A:C1'   | 1:A:380:A:N1   | 2.78                     | 0.47              |
| 1:A:153:C:HO2'  | 1:A:218:A:HO2' | 1.57                     | 0.46              |
| 1:A:181:A:H3'   | 1:A:182:C:C6   | 2.50                     | 0.46              |
| 1:A:352:U:H2'   | 1:A:353:A:C8   | 2.51                     | 0.46              |
| 1:A:210:U:H2'   | 1:A:211:A:O4'  | 2.16                     | 0.46              |
| 3:B:111:LEU:C   | 3:B:113:LYS:N  | 2.72                     | 0.46              |

Continued on next page...

Continued from previous page...

| Atom-1         | Atom-2           | Interatomic distance (Å) | Clash overlap (Å) |
|----------------|------------------|--------------------------|-------------------|
| 1:A:155:A:H1'  | 1:A:216:A:C2     | 2.51                     | 0.46              |
| 1:A:151:A:H2'  | 1:A:152:C:O4'    | 2.16                     | 0.46              |
| 1:A:308:A:N1   | 1:A:329:U:H5     | 2.14                     | 0.46              |
| 1:A:220:C:C2   | 1:A:221:U:C5     | 3.04                     | 0.46              |
| 1:A:319:A:H1'  | 1:A:320:U:C5     | 2.51                     | 0.45              |
| 1:A:338:G:H2'  | 1:A:339:A:H8     | 1.80                     | 0.45              |
| 3:B:53:LYS:O   | 3:B:57:ARG:HG3   | 2.16                     | 0.45              |
| 1:A:268:G:C6   | 2:C:75:A:N1      | 2.84                     | 0.45              |
| 3:B:24:ALA:HB2 | 3:B:29:VAL:HG13  | 1.98                     | 0.45              |
| 1:A:148:A:H62  | 1:A:177:G:H1'    | 1.82                     | 0.45              |
| 1:A:76:G:N3    | 1:A:296:A:H2     | 2.15                     | 0.45              |
| 1:A:151:A:C2   | 1:A:152:C:H1'    | 2.51                     | 0.45              |
| 3:B:25:ASN:CG  | 3:B:104:VAL:HB   | 2.41                     | 0.45              |
| 1:A:32:G:H2'   | 1:A:32:G:N3      | 2.32                     | 0.45              |
| 1:A:50:A:N3    | 1:A:50:A:H2'     | 2.31                     | 0.45              |
| 1:A:199:U:H3   | 1:A:227:G:N2     | 2.15                     | 0.45              |
| 1:A:404:G:H2'  | 1:A:405:C:O4'    | 2.17                     | 0.45              |
| 1:A:87:U:H6    | 1:A:87:U:O5'     | 2.00                     | 0.45              |
| 1:A:239:A:H4'  | 1:A:241:A:C5'    | 2.47                     | 0.45              |
| 2:C:21:G:H2'   | 2:C:22:A:C8      | 2.52                     | 0.45              |
| 3:B:111:LEU:C  | 3:B:113:LYS:H    | 2.25                     | 0.45              |
| 1:A:32:G:N2    | 1:A:34:U:H1'     | 2.32                     | 0.44              |
| 3:B:100:SER:O  | 3:B:101:LEU:C    | 2.59                     | 0.44              |
| 3:B:2:LYS:HE3  | 3:B:2:LYS:HB3    | 1.38                     | 0.44              |
| 1:A:416:U:H2'  | 1:A:417:C:O4'    | 2.17                     | 0.44              |
| 1:A:364:A:H2'  | 1:A:365:G:O4'    | 2.18                     | 0.44              |
| 3:B:28:PHE:HB2 | 3:B:104:VAL:HG11 | 2.00                     | 0.44              |
| 1:A:181:A:H3'  | 1:A:182:C:H6     | 1.83                     | 0.44              |
| 2:C:34:C:H2'   | 2:C:35:C:H6      | 1.82                     | 0.44              |
| 1:A:102:C:H2'  | 1:A:103:C:O4'    | 2.18                     | 0.44              |
| 1:A:175:U:H2'  | 1:A:176:C:H6     | 1.82                     | 0.44              |
| 1:A:60:C:H2'   | 1:A:61:G:H8      | 1.82                     | 0.44              |
| 1:A:128:G:H2'  | 1:A:129:C:H6     | 1.82                     | 0.44              |
| 1:A:173:G:H2'  | 1:A:174:U:H6     | 1.82                     | 0.44              |
| 1:A:360:G:H3'  | 1:A:361:C:H6     | 1.82                     | 0.44              |
| 2:C:29:C:H2'   | 2:C:30:C:C6      | 2.51                     | 0.44              |
| 1:A:114:G:H2'  | 1:A:115:C:C6     | 2.52                     | 0.44              |
| 1:A:175:U:H2'  | 1:A:176:C:C6     | 2.53                     | 0.44              |
| 1:A:350:A:C8   | 1:A:380:A:C6     | 3.06                     | 0.44              |
| 2:C:21:G:H2'   | 2:C:22:A:H8      | 1.83                     | 0.44              |
| 1:A:134:C:H2'  | 1:A:135:U:O4'    | 2.17                     | 0.44              |

Continued on next page...

Continued from previous page...

| Atom-1          | Atom-2         | Interatomic distance (Å) | Clash overlap (Å) |
|-----------------|----------------|--------------------------|-------------------|
| 1:A:380:A:H2'   | 1:A:380:A:N3   | 2.32                     | 0.44              |
| 1:A:382:G:H2'   | 1:A:383:G:O4'  | 2.18                     | 0.44              |
| 3:B:12:GLU:HG2  | 3:B:42:ARG:NH2 | 2.32                     | 0.44              |
| 1:A:101:U:OP2   | 1:A:279:C:H4'  | 2.17                     | 0.43              |
| 1:A:358:G:H1    | 1:A:366:C:H42  | 1.66                     | 0.43              |
| 1:A:17:U:H2'    | 1:A:18:A:H8    | 1.82                     | 0.43              |
| 1:A:152:C:H2'   | 1:A:153:C:O4'  | 2.18                     | 0.43              |
| 1:A:317:G:C5    | 1:A:318:C:N3   | 2.86                     | 0.43              |
| 1:A:365:G:H2'   | 1:A:365:G:N3   | 2.33                     | 0.43              |
| 1:A:173:G:O2'   | 1:A:219:C:O2'  | 2.26                     | 0.43              |
| 1:A:177:G:H2'   | 1:A:178:A:N7   | 2.34                     | 0.43              |
| 1:A:355:G:H2'   | 1:A:356:A:C8   | 2.54                     | 0.43              |
| 3:B:11:GLU:O    | 3:B:15:GLU:HG3 | 2.19                     | 0.43              |
| 1:A:154:U:H2'   | 1:A:155:A:C4   | 2.54                     | 0.43              |
| 1:A:354:C:H2'   | 1:A:355:G:O4'  | 2.19                     | 0.43              |
| 1:A:68:G:N3     | 1:A:68:G:H2'   | 2.34                     | 0.43              |
| 3:B:51:LEU:HD13 | 3:B:51:LEU:HA  | 1.67                     | 0.43              |
| 3:B:73:GLU:OE1  | 3:B:73:GLU:N   | 2.52                     | 0.43              |
| 1:A:166:G:H2'   | 1:A:167:G:C8   | 2.54                     | 0.43              |
| 1:A:214:G:N2    | 1:A:218:A:H61  | 2.17                     | 0.43              |
| 1:A:171:U:C2    | 1:A:172:G:C8   | 3.07                     | 0.43              |
| 1:A:200:G:C6    | 1:A:232:A:C5   | 3.07                     | 0.43              |
| 3:B:1:MET:HB3   | 3:B:1:MET:HE3  | 1.68                     | 0.42              |
| 1:A:224:G:H3'   | 1:A:225:A:H5'' | 2.01                     | 0.42              |
| 1:A:380:A:C2    | 1:A:381:A:H1'  | 2.54                     | 0.42              |
| 3:B:3:LYS:C     | 3:B:5:TYR:N    | 2.78                     | 0.42              |
| 1:A:216:A:O2'   | 1:A:217:A:OP2  | 2.33                     | 0.42              |
| 1:A:252:G:H2'   | 1:A:253:A:O4'  | 2.20                     | 0.42              |
| 1:A:95:A:H2'    | 1:A:96:G:C8    | 2.55                     | 0.42              |
| 1:A:239:A:H4'   | 1:A:241:A:H5'' | 2.01                     | 0.42              |
| 1:A:343:C:H2'   | 1:A:344:C:C6   | 2.54                     | 0.42              |
| 1:A:349:G:N2    | 1:A:378:C:C2   | 2.88                     | 0.42              |
| 1:A:406:A:H2'   | 1:A:407:U:O4'  | 2.20                     | 0.42              |
| 3:B:53:LYS:H    | 3:B:53:LYS:HG2 | 1.54                     | 0.42              |
| 1:A:17:U:H2'    | 1:A:18:A:C8    | 2.55                     | 0.42              |
| 1:A:123:C:H2'   | 1:A:124:U:O4'  | 2.19                     | 0.42              |
| 1:A:146:A:OP1   | 1:A:146:A:H4'  | 2.19                     | 0.42              |
| 1:A:199:U:H5    | 1:A:206:G:N3   | 2.18                     | 0.42              |
| 1:A:344:C:H2'   | 1:A:345:G:H8   | 1.85                     | 0.42              |
| 2:C:9:A:H5'     | 2:C:45:G:H21   | 1.85                     | 0.42              |
| 1:A:180:U:O2'   | 1:A:181:A:H5'  | 2.20                     | 0.42              |

Continued on next page...

*Continued from previous page...*

| Atom-1         | Atom-2           | Interatomic distance (Å) | Clash overlap (Å) |
|----------------|------------------|--------------------------|-------------------|
| 1:A:263:A:O5'  | 1:A:263:A:H8     | 2.02                     | 0.42              |
| 1:A:298:G:O2'  | 1:A:299:G:H5'    | 2.20                     | 0.42              |
| 1:A:363:A:O2'  | 1:A:364:A:O4'    | 2.32                     | 0.42              |
| 1:A:208:U:H2'  | 1:A:209:C:O4'    | 2.20                     | 0.42              |
| 1:A:311:G:C8   | 1:A:311:G:H5''   | 2.54                     | 0.42              |
| 1:A:95:A:H2'   | 1:A:96:G:H8      | 1.85                     | 0.41              |
| 1:A:133:G:C2'  | 1:A:134:C:H5'    | 2.50                     | 0.41              |
| 1:A:363:A:C2'  | 1:A:364:A:C1'    | 2.93                     | 0.41              |
| 1:A:10:G:C6    | 1:A:406:A:N1     | 2.88                     | 0.41              |
| 1:A:19:A:H2'   | 1:A:20:U:H6      | 1.85                     | 0.41              |
| 1:A:38:G:H2'   | 1:A:39:C:C6      | 2.55                     | 0.41              |
| 1:A:147:A:N6   | 1:A:177:G:O2'    | 2.53                     | 0.41              |
| 1:A:209:C:H2'  | 1:A:210:U:C6     | 2.55                     | 0.41              |
| 1:A:215:G:O2'  | 1:A:217:A:N7     | 2.52                     | 0.41              |
| 1:A:239:A:H5'  | 1:A:241:A:H5''   | 2.00                     | 0.41              |
| 1:A:59:U:H2'   | 1:A:60:C:H6      | 1.84                     | 0.41              |
| 1:A:171:U:H2'  | 1:A:172:G:C8     | 2.56                     | 0.41              |
| 1:A:229:G:N2   | 1:A:231:A:H3'    | 2.35                     | 0.41              |
| 2:C:39:G:H2'   | 2:C:40:U:C6      | 2.55                     | 0.41              |
| 1:A:153:C:O2'  | 1:A:218:A:O2'    | 2.29                     | 0.41              |
| 1:A:220:C:H2'  | 1:A:221:U:H6     | 1.83                     | 0.41              |
| 1:A:364:A:H3'  | 1:A:364:A:P      | 2.60                     | 0.41              |
| 1:A:321:G:H2'  | 1:A:322:C:C6     | 2.55                     | 0.41              |
| 1:A:350:A:C4   | 1:A:380:A:C5     | 3.09                     | 0.41              |
| 1:A:14:G:C2'   | 1:A:401:A:H61    | 2.33                     | 0.41              |
| 1:A:151:A:C2   | 1:A:175:U:C2     | 3.09                     | 0.41              |
| 1:A:350:A:C4   | 1:A:380:A:C4     | 3.09                     | 0.41              |
| 1:A:414:C:H2'  | 1:A:415:G:C8     | 2.53                     | 0.41              |
| 1:A:102:C:H2'  | 1:A:103:C:C6     | 2.56                     | 0.41              |
| 1:A:311:G:H5'' | 1:A:311:G:H8     | 1.85                     | 0.41              |
| 1:A:263:A:H2'  | 1:A:264:U:O4'    | 2.21                     | 0.41              |
| 1:A:160:C:C2'  | 1:A:166:G:H1     | 2.34                     | 0.41              |
| 3:B:111:LEU:HA | 3:B:111:LEU:HD22 | 1.80                     | 0.41              |
| 1:A:267:U:C4   | 2:C:75:A:C4      | 3.09                     | 0.41              |
| 1:A:67:U:H1'   | 1:A:68:G:C8      | 2.57                     | 0.40              |
| 1:A:117:G:H3'  | 1:A:118:C:H6     | 1.86                     | 0.40              |
| 1:A:179:U:H1'  | 1:A:203:G:H5'    | 2.04                     | 0.40              |
| 1:A:215:G:N2   | 1:A:217:A:H3'    | 2.36                     | 0.40              |
| 1:A:363:A:C8   | 1:A:363:A:C5'    | 3.03                     | 0.40              |
| 1:A:9:U:C2     | 1:A:10:G:C8      | 3.09                     | 0.40              |
| 1:A:102:C:H2'  | 1:A:103:C:H6     | 1.86                     | 0.40              |

*Continued on next page...*

Continued from previous page...

| Atom-1        | Atom-2         | Interatomic distance (Å) | Clash overlap (Å) |
|---------------|----------------|--------------------------|-------------------|
| 1:A:218:A:O5' | 1:A:218:A:H8   | 2.05                     | 0.40              |
| 1:A:272:G:C8  | 1:A:272:G:H5'' | 2.57                     | 0.40              |
| 1:A:363:A:H2' | 1:A:364:A:C5   | 2.56                     | 0.40              |
| 2:C:35:C:H2'  | 2:C:36:A:O4'   | 2.20                     | 0.40              |
| 1:A:353:A:H2' | 1:A:354:C:O4'  | 2.21                     | 0.40              |
| 3:B:3:LYS:O   | 3:B:6:ARG:N    | 2.43                     | 0.40              |
| 1:A:158:U:H2' | 1:A:159:C:C6   | 2.57                     | 0.40              |
| 1:A:377:A:H3' | 1:A:378:C:H6   | 1.86                     | 0.40              |
| 3:B:101:LEU:O | 3:B:102:ILE:C  | 2.65                     | 0.40              |

There are no symmetry-related clashes.

### 5.3 Torsion angles [i](#)

#### 5.3.1 Protein backbone [i](#)

In the following table, the Percentiles column shows the percent Ramachandran outliers of the chain as a percentile score with respect to all PDB entries followed by that with respect to all EM entries.

The Analysed column shows the number of residues for which the backbone conformation was analysed, and the total number of residues.

| Mol | Chain | Analysed        | Favoured  | Allowed | Outliers | Percentiles           |
|-----|-------|-----------------|-----------|---------|----------|-----------------------|
| 3   | B     | 114 / 116 (98%) | 106 (93%) | 8 (7%)  | 0        | <b>100</b> <b>100</b> |

There are no Ramachandran outliers to report.

#### 5.3.2 Protein sidechains [i](#)

In the following table, the Percentiles column shows the percent sidechain outliers of the chain as a percentile score with respect to all PDB entries followed by that with respect to all EM entries.

The Analysed column shows the number of residues for which the sidechain conformation was analysed, and the total number of residues.

| Mol | Chain | Analysed       | Rotameric | Outliers | Percentiles        |
|-----|-------|----------------|-----------|----------|--------------------|
| 3   | B     | 99 / 99 (100%) | 85 (86%)  | 14 (14%) | <b>3</b> <b>12</b> |

All (14) residues with a non-rotameric sidechain are listed below:

| Mol | Chain | Res | Type |
|-----|-------|-----|------|
| 3   | B     | 1   | MET  |
| 3   | B     | 2   | LYS  |
| 3   | B     | 26  | ARG  |
| 3   | B     | 51  | LEU  |
| 3   | B     | 53  | LYS  |
| 3   | B     | 71  | LEU  |
| 3   | B     | 87  | GLN  |
| 3   | B     | 92  | MET  |
| 3   | B     | 97  | VAL  |
| 3   | B     | 98  | LYS  |
| 3   | B     | 99  | LYS  |
| 3   | B     | 101 | LEU  |
| 3   | B     | 102 | ILE  |
| 3   | B     | 111 | LEU  |

Sometimes sidechains can be flipped to improve hydrogen bonding and reduce clashes. All (2) such sidechains are listed below:

| Mol | Chain | Res | Type |
|-----|-------|-----|------|
| 3   | B     | 10  | ASN  |
| 3   | B     | 14  | GLN  |

### 5.3.3 RNA [i](#)

| Mol | Chain | Analysed      | Backbone Outliers | Pucker Outliers |
|-----|-------|---------------|-------------------|-----------------|
| 1   | A     | 416/417 (99%) | 183 (43%)         | 21 (5%)         |
| 2   | C     | 74/78 (94%)   | 22 (29%)          | 2 (2%)          |
| All | All   | 490/495 (98%) | 205 (41%)         | 23 (4%)         |

All (205) RNA backbone outliers are listed below:

| Mol | Chain | Res | Type |
|-----|-------|-----|------|
| 1   | A     | 2   | U    |
| 1   | A     | 9   | U    |
| 1   | A     | 11  | C    |
| 1   | A     | 15  | G    |
| 1   | A     | 28  | G    |
| 1   | A     | 30  | C    |
| 1   | A     | 32  | G    |
| 1   | A     | 33  | U    |

*Continued on next page...*

*Continued from previous page...*

| Mol | Chain | Res | Type |
|-----|-------|-----|------|
| 1   | A     | 35  | U    |
| 1   | A     | 36  | C    |
| 1   | A     | 44  | G    |
| 1   | A     | 47  | G    |
| 1   | A     | 48  | A    |
| 1   | A     | 49  | A    |
| 1   | A     | 50  | A    |
| 1   | A     | 51  | G    |
| 1   | A     | 52  | U    |
| 1   | A     | 53  | C    |
| 1   | A     | 63  | A    |
| 1   | A     | 66  | G    |
| 1   | A     | 67  | U    |
| 1   | A     | 68  | G    |
| 1   | A     | 70  | U    |
| 1   | A     | 74  | A    |
| 1   | A     | 75  | U    |
| 1   | A     | 76  | G    |
| 1   | A     | 80  | G    |
| 1   | A     | 81  | U    |
| 1   | A     | 82  | A    |
| 1   | A     | 85  | G    |
| 1   | A     | 86  | U    |
| 1   | A     | 87  | U    |
| 1   | A     | 90  | U    |
| 1   | A     | 91  | G    |
| 1   | A     | 92  | C    |
| 1   | A     | 99  | A    |
| 1   | A     | 101 | U    |
| 1   | A     | 102 | C    |
| 1   | A     | 117 | G    |
| 1   | A     | 118 | C    |
| 1   | A     | 122 | G    |
| 1   | A     | 123 | C    |
| 1   | A     | 126 | U    |
| 1   | A     | 127 | G    |
| 1   | A     | 128 | G    |
| 1   | A     | 130 | U    |
| 1   | A     | 131 | G    |
| 1   | A     | 132 | G    |
| 1   | A     | 134 | C    |
| 1   | A     | 135 | U    |

*Continued on next page...*

*Continued from previous page...*

| Mol | Chain | Res | Type |
|-----|-------|-----|------|
| 1   | A     | 136 | G    |
| 1   | A     | 137 | A    |
| 1   | A     | 138 | C    |
| 1   | A     | 142 | G    |
| 1   | A     | 146 | A    |
| 1   | A     | 147 | A    |
| 1   | A     | 148 | A    |
| 1   | A     | 150 | A    |
| 1   | A     | 151 | A    |
| 1   | A     | 152 | C    |
| 1   | A     | 153 | C    |
| 1   | A     | 155 | A    |
| 1   | A     | 157 | G    |
| 1   | A     | 159 | C    |
| 1   | A     | 160 | C    |
| 1   | A     | 161 | G    |
| 1   | A     | 162 | G    |
| 1   | A     | 163 | C    |
| 1   | A     | 164 | U    |
| 1   | A     | 172 | G    |
| 1   | A     | 173 | G    |
| 1   | A     | 174 | U    |
| 1   | A     | 175 | U    |
| 1   | A     | 177 | G    |
| 1   | A     | 178 | A    |
| 1   | A     | 179 | U    |
| 1   | A     | 180 | U    |
| 1   | A     | 182 | C    |
| 1   | A     | 183 | C    |
| 1   | A     | 186 | G    |
| 1   | A     | 187 | A    |
| 1   | A     | 190 | G    |
| 1   | A     | 192 | G    |
| 1   | A     | 197 | A    |
| 1   | A     | 198 | G    |
| 1   | A     | 199 | U    |
| 1   | A     | 202 | C    |
| 1   | A     | 203 | G    |
| 1   | A     | 204 | G    |
| 1   | A     | 205 | A    |
| 1   | A     | 207 | C    |
| 1   | A     | 210 | U    |

*Continued on next page...*

*Continued from previous page...*

| Mol | Chain | Res | Type |
|-----|-------|-----|------|
| 1   | A     | 212 | A    |
| 1   | A     | 214 | G    |
| 1   | A     | 215 | G    |
| 1   | A     | 216 | A    |
| 1   | A     | 220 | C    |
| 1   | A     | 221 | U    |
| 1   | A     | 224 | G    |
| 1   | A     | 225 | A    |
| 1   | A     | 229 | G    |
| 1   | A     | 230 | G    |
| 1   | A     | 232 | A    |
| 1   | A     | 233 | C    |
| 1   | A     | 235 | C    |
| 1   | A     | 236 | G    |
| 1   | A     | 238 | U    |
| 1   | A     | 239 | A    |
| 1   | A     | 240 | A    |
| 1   | A     | 241 | A    |
| 1   | A     | 242 | C    |
| 1   | A     | 250 | G    |
| 1   | A     | 255 | A    |
| 1   | A     | 256 | A    |
| 1   | A     | 257 | A    |
| 1   | A     | 261 | A    |
| 1   | A     | 264 | U    |
| 1   | A     | 266 | A    |
| 1   | A     | 267 | U    |
| 1   | A     | 271 | A    |
| 1   | A     | 275 | G    |
| 1   | A     | 276 | C    |
| 1   | A     | 278 | C    |
| 1   | A     | 292 | A    |
| 1   | A     | 295 | A    |
| 1   | A     | 296 | A    |
| 1   | A     | 300 | A    |
| 1   | A     | 303 | G    |
| 1   | A     | 305 | A    |
| 1   | A     | 306 | G    |
| 1   | A     | 312 | G    |
| 1   | A     | 314 | G    |
| 1   | A     | 317 | G    |
| 1   | A     | 318 | C    |

*Continued on next page...*

*Continued from previous page...*

| Mol | Chain | Res | Type |
|-----|-------|-----|------|
| 1   | A     | 321 | G    |
| 1   | A     | 322 | C    |
| 1   | A     | 323 | A    |
| 1   | A     | 324 | G    |
| 1   | A     | 325 | C    |
| 1   | A     | 327 | U    |
| 1   | A     | 329 | U    |
| 1   | A     | 330 | A    |
| 1   | A     | 333 | U    |
| 1   | A     | 334 | A    |
| 1   | A     | 335 | G    |
| 1   | A     | 342 | A    |
| 1   | A     | 346 | C    |
| 1   | A     | 347 | C    |
| 1   | A     | 349 | G    |
| 1   | A     | 350 | A    |
| 1   | A     | 351 | G    |
| 1   | A     | 353 | A    |
| 1   | A     | 358 | G    |
| 1   | A     | 359 | C    |
| 1   | A     | 361 | C    |
| 1   | A     | 362 | A    |
| 1   | A     | 363 | A    |
| 1   | A     | 364 | A    |
| 1   | A     | 365 | G    |
| 1   | A     | 366 | C    |
| 1   | A     | 367 | C    |
| 1   | A     | 368 | G    |
| 1   | A     | 369 | C    |
| 1   | A     | 372 | G    |
| 1   | A     | 373 | C    |
| 1   | A     | 375 | G    |
| 1   | A     | 376 | U    |
| 1   | A     | 379 | G    |
| 1   | A     | 380 | A    |
| 1   | A     | 381 | A    |
| 1   | A     | 382 | G    |
| 1   | A     | 383 | G    |
| 1   | A     | 384 | U    |
| 1   | A     | 389 | A    |
| 1   | A     | 390 | A    |
| 1   | A     | 391 | C    |

*Continued on next page...*

Continued from previous page...

| Mol | Chain | Res | Type |
|-----|-------|-----|------|
| 1   | A     | 392 | A    |
| 1   | A     | 399 | A    |
| 1   | A     | 401 | A    |
| 1   | A     | 402 | G    |
| 1   | A     | 407 | U    |
| 1   | A     | 408 | G    |
| 1   | A     | 410 | U    |
| 2   | C     | 4   | G    |
| 2   | C     | 10  | G    |
| 2   | C     | 11  | U    |
| 2   | C     | 12  | U    |
| 2   | C     | 13  | C    |
| 2   | C     | 14  | A    |
| 2   | C     | 16  | U    |
| 2   | C     | 17  | G    |
| 2   | C     | 18  | G    |
| 2   | C     | 20  | A    |
| 2   | C     | 23  | A    |
| 2   | C     | 26  | C    |
| 2   | C     | 27  | C    |
| 2   | C     | 33  | G    |
| 2   | C     | 37  | A    |
| 2   | C     | 44  | G    |
| 2   | C     | 45  | G    |
| 2   | C     | 46  | U    |
| 2   | C     | 47  | C    |
| 2   | C     | 58  | G    |
| 2   | C     | 59  | U    |
| 2   | C     | 75  | A    |

All (23) RNA pucker outliers are listed below:

| Mol | Chain | Res | Type |
|-----|-------|-----|------|
| 1   | A     | 50  | A    |
| 1   | A     | 52  | U    |
| 1   | A     | 67  | U    |
| 1   | A     | 75  | U    |
| 1   | A     | 85  | G    |
| 1   | A     | 91  | G    |
| 1   | A     | 101 | U    |
| 1   | A     | 122 | G    |
| 1   | A     | 126 | U    |

Continued on next page...

Continued from previous page...

| Mol | Chain | Res | Type |
|-----|-------|-----|------|
| 1   | A     | 136 | G    |
| 1   | A     | 176 | C    |
| 1   | A     | 206 | G    |
| 1   | A     | 232 | A    |
| 1   | A     | 233 | C    |
| 1   | A     | 255 | A    |
| 1   | A     | 271 | A    |
| 1   | A     | 334 | A    |
| 1   | A     | 349 | G    |
| 1   | A     | 363 | A    |
| 1   | A     | 365 | G    |
| 1   | A     | 389 | A    |
| 2   | C     | 15  | G    |
| 2   | C     | 46  | U    |

#### 5.4 Non-standard residues in protein, DNA, RNA chains [i](#)

There are no non-standard protein/DNA/RNA residues in this entry.

#### 5.5 Carbohydrates [i](#)

There are no oligosaccharides in this entry.

#### 5.6 Ligand geometry [i](#)

Of 27 ligands modelled in this entry, 27 are monoatomic - leaving 0 for Mogul analysis.

There are no bond length outliers.

There are no bond angle outliers.

There are no chirality outliers.

There are no torsion outliers.

There are no ring outliers.

No monomer is involved in short contacts.

#### 5.7 Other polymers [i](#)

There are no such residues in this entry.

## 5.8 Polymer linkage issues [i](#)

There are no chain breaks in this entry.

For Manuscript Review

## 6 Map visualisation [i](#)

This section contains visualisations of the EMDB entry EMD-70945. These allow visual inspection of the internal detail of the map and identification of artifacts.

Images derived from a raw map, generated by summing the deposited half-maps, are presented below the corresponding image components of the primary map to allow further visual inspection and comparison with those of the primary map.

### 6.1 Orthogonal projections [i](#)

#### 6.1.1 Primary map

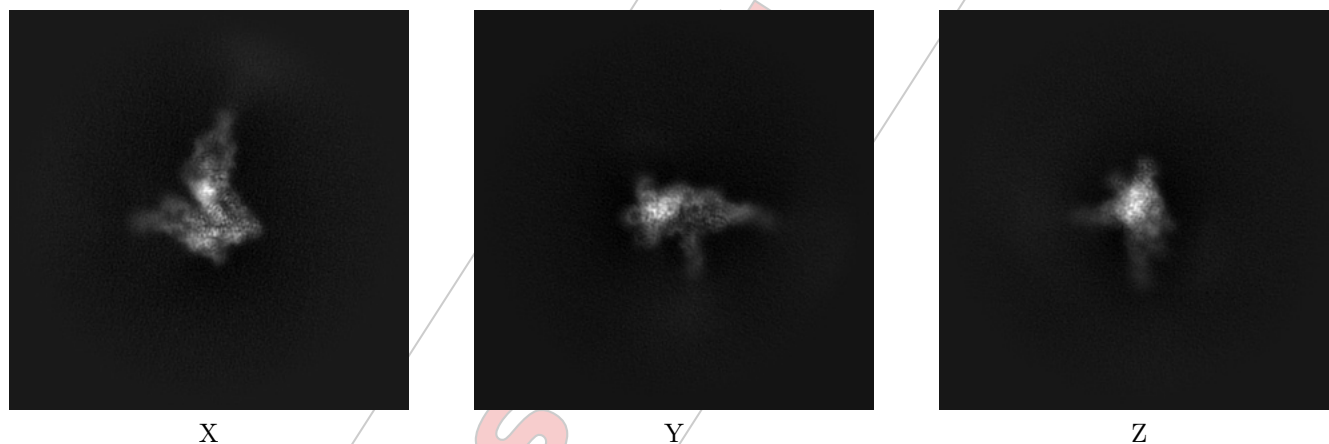

#### 6.1.2 Raw map

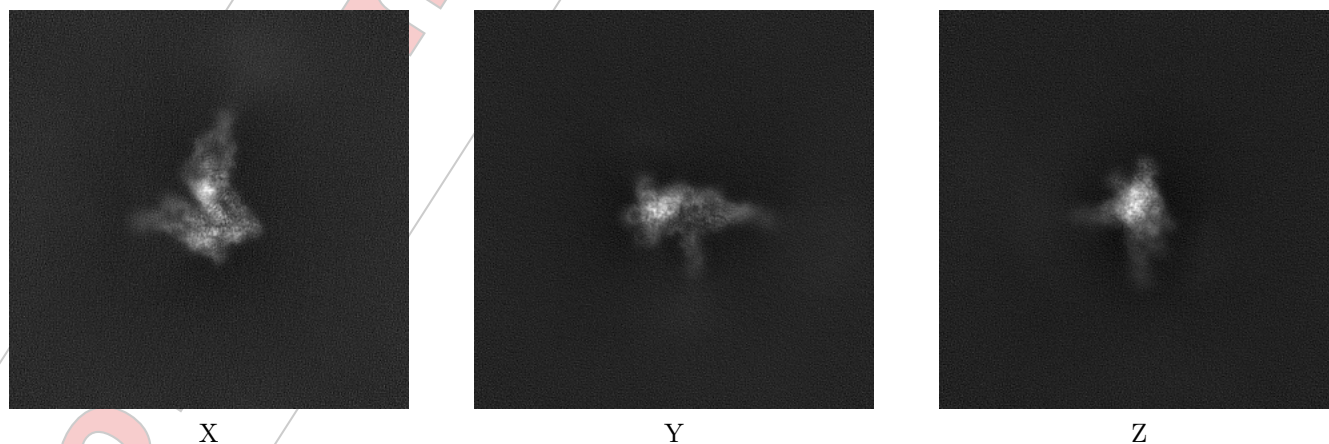

The images above show the map projected in three orthogonal directions.

## 6.2 Central slices [i](#)

### 6.2.1 Primary map

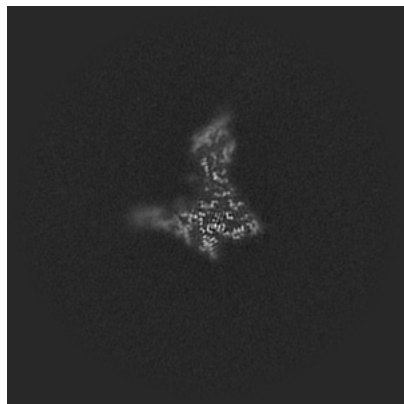

X Index: 200

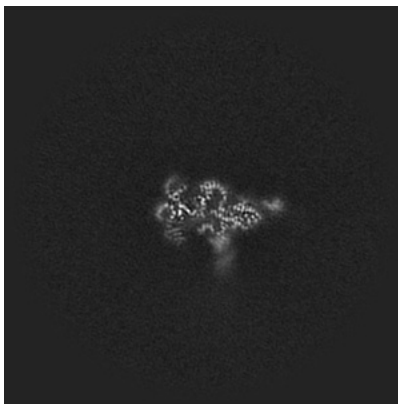

Y Index: 200

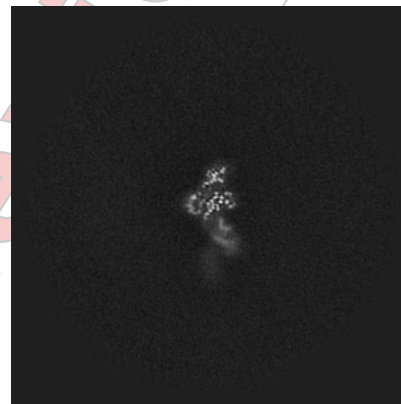

Z Index: 200

### 6.2.2 Raw map

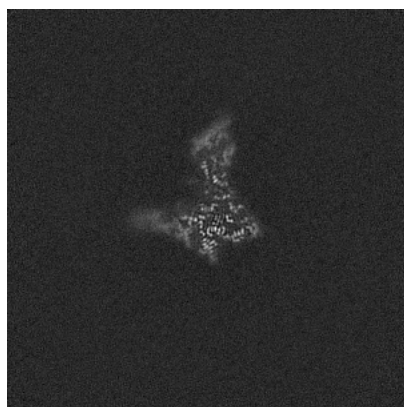

X Index: 200

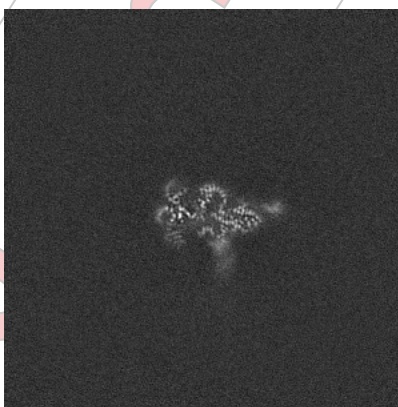

Y Index: 200

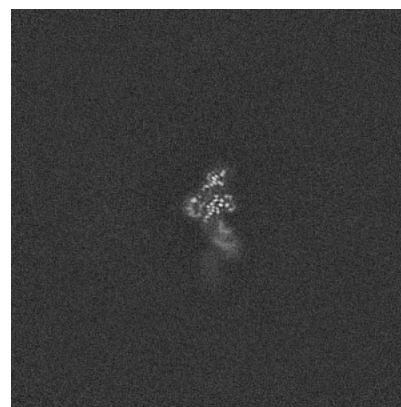

Z Index: 200

The images above show central slices of the map in three orthogonal directions.

## 6.3 Largest variance slices [i](#)

### 6.3.1 Primary map

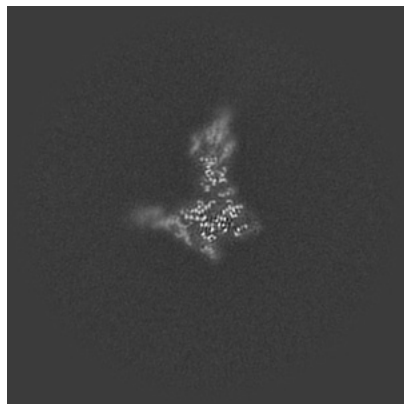

X Index: 197

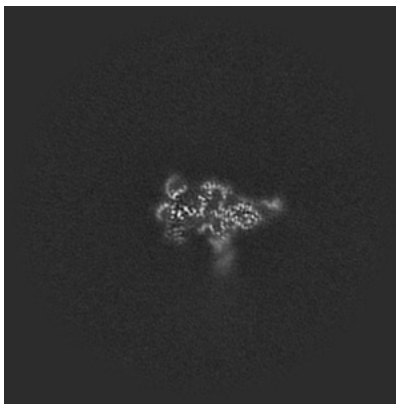

Y Index: 199

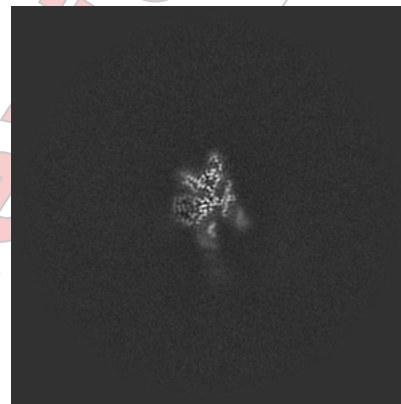

Z Index: 175

### 6.3.2 Raw map

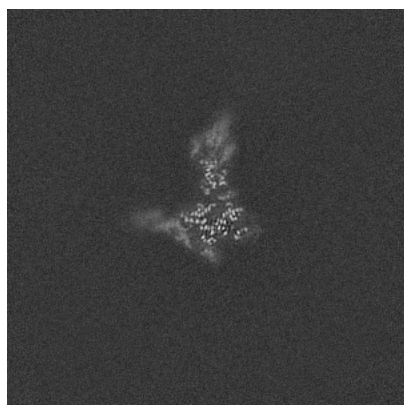

X Index: 197

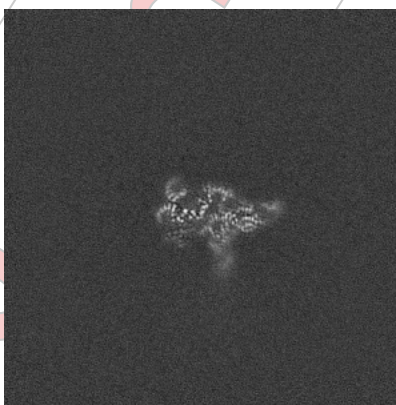

Y Index: 198

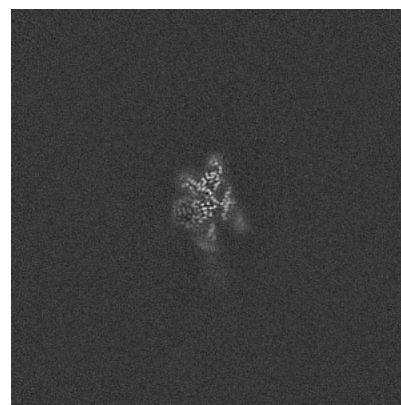

Z Index: 176

The images above show the largest variance slices of the map in three orthogonal directions.

## 6.4 Orthogonal standard-deviation projections (False-color) [i](#)

### 6.4.1 Primary map

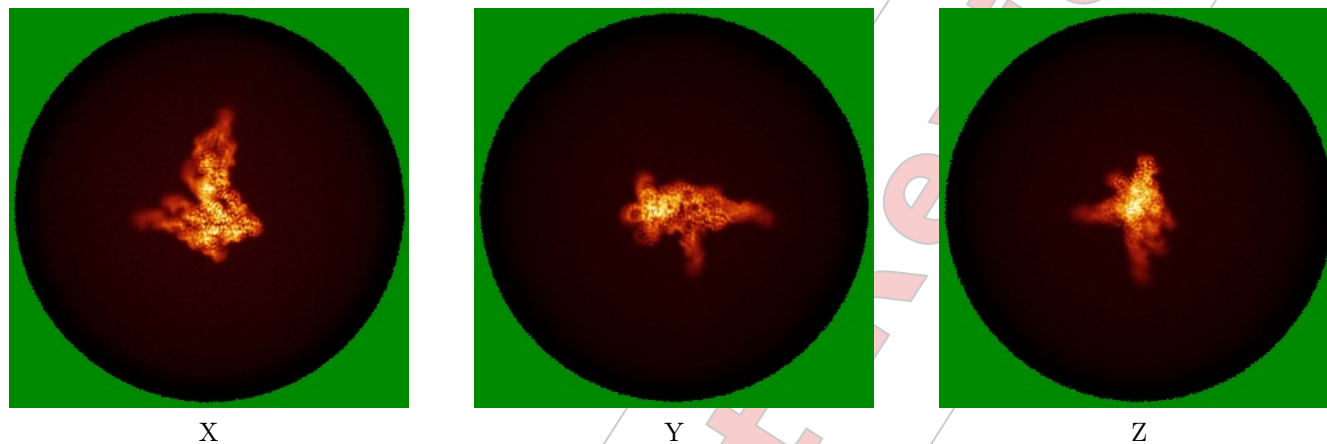

### 6.4.2 Raw map

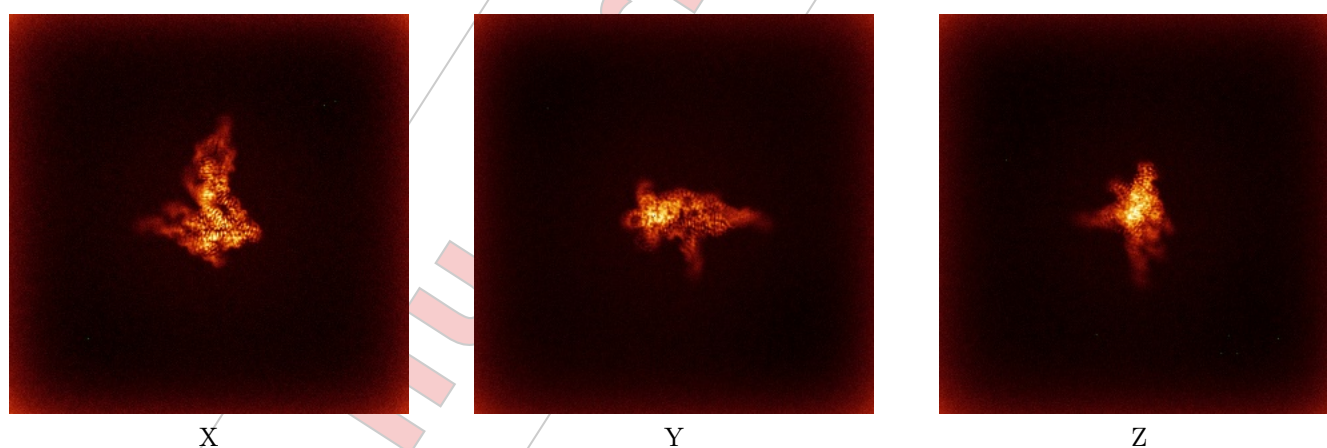

The images above show the map standard deviation projections with false color in three orthogonal directions. Minimum values are shown in green, max in blue, and dark to light orange shades represent small to large values respectively.

## 6.5 Orthogonal surface views [i](#)

### 6.5.1 Primary map

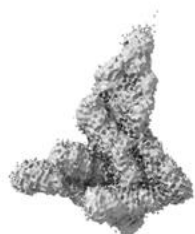

X

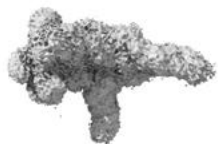

Y

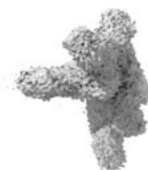

Z

The images above show the 3D surface view of the map at the recommended contour level 0.03. These images, in conjunction with the slice images, may facilitate assessment of whether an appropriate contour level has been provided.

### 6.5.2 Raw map

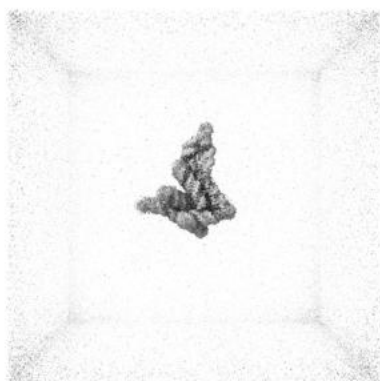

X

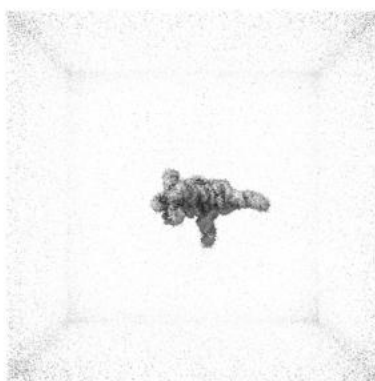

Y

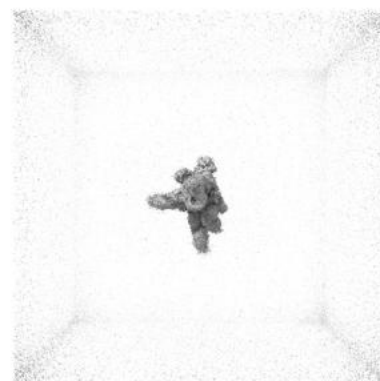

Z

These images show the 3D surface of the raw map. The raw map's contour level was selected so that its surface encloses the same volume as the primary map does at its recommended contour level.

## 6.6 Mask visualisation [i](#)

This section was not generated. No masks/segmentation were deposited.

## 7 Map analysis [i](#)

This section contains the results of statistical analysis of the map.

### 7.1 Map-value distribution [i](#)

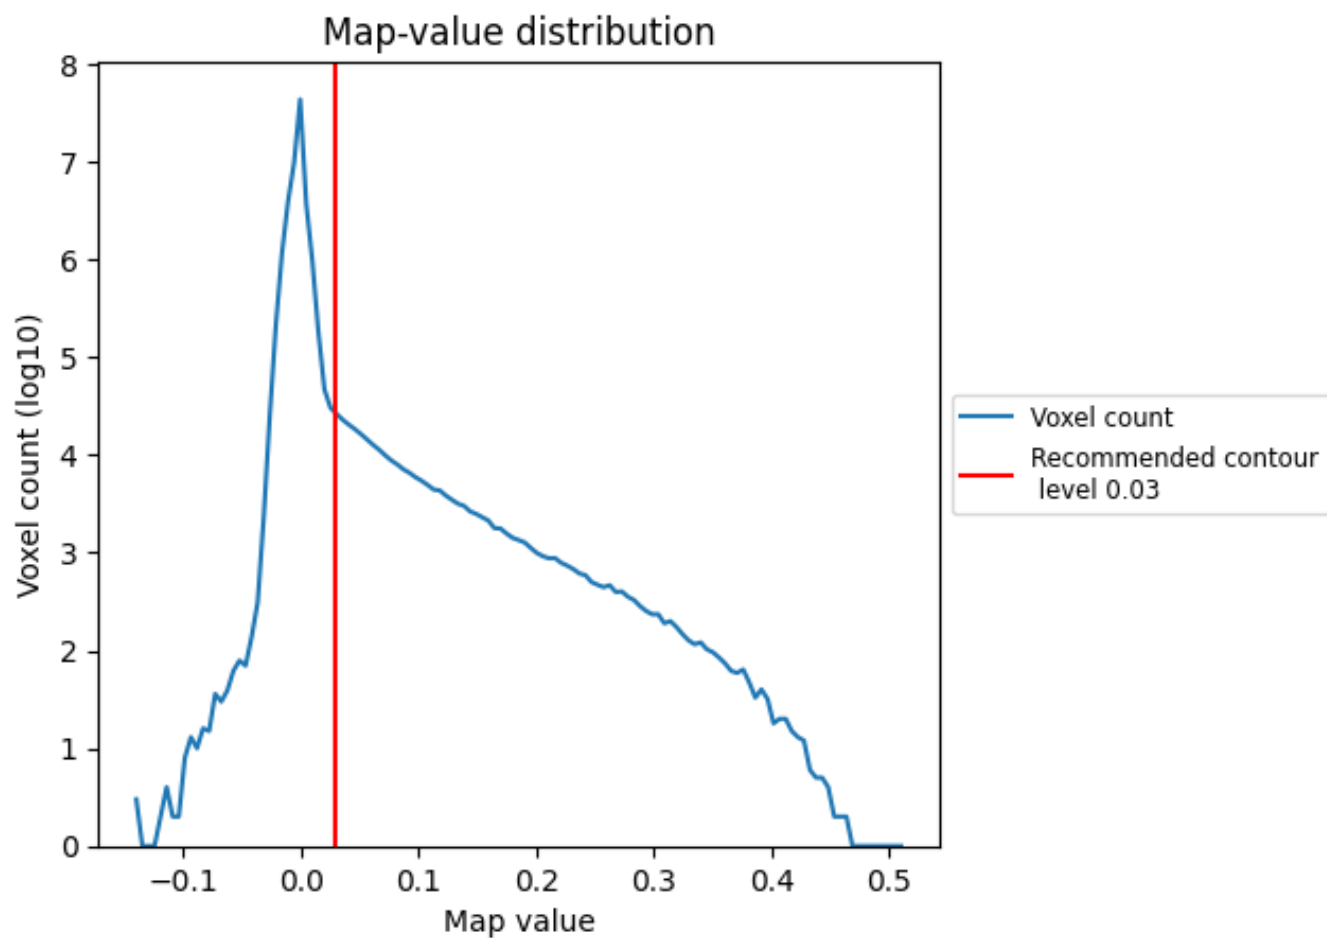

The map-value distribution is plotted in 128 intervals along the x-axis. The y-axis is logarithmic. A spike in this graph at zero usually indicates that the volume has been masked.

## 7.2 Volume estimate [i](#)

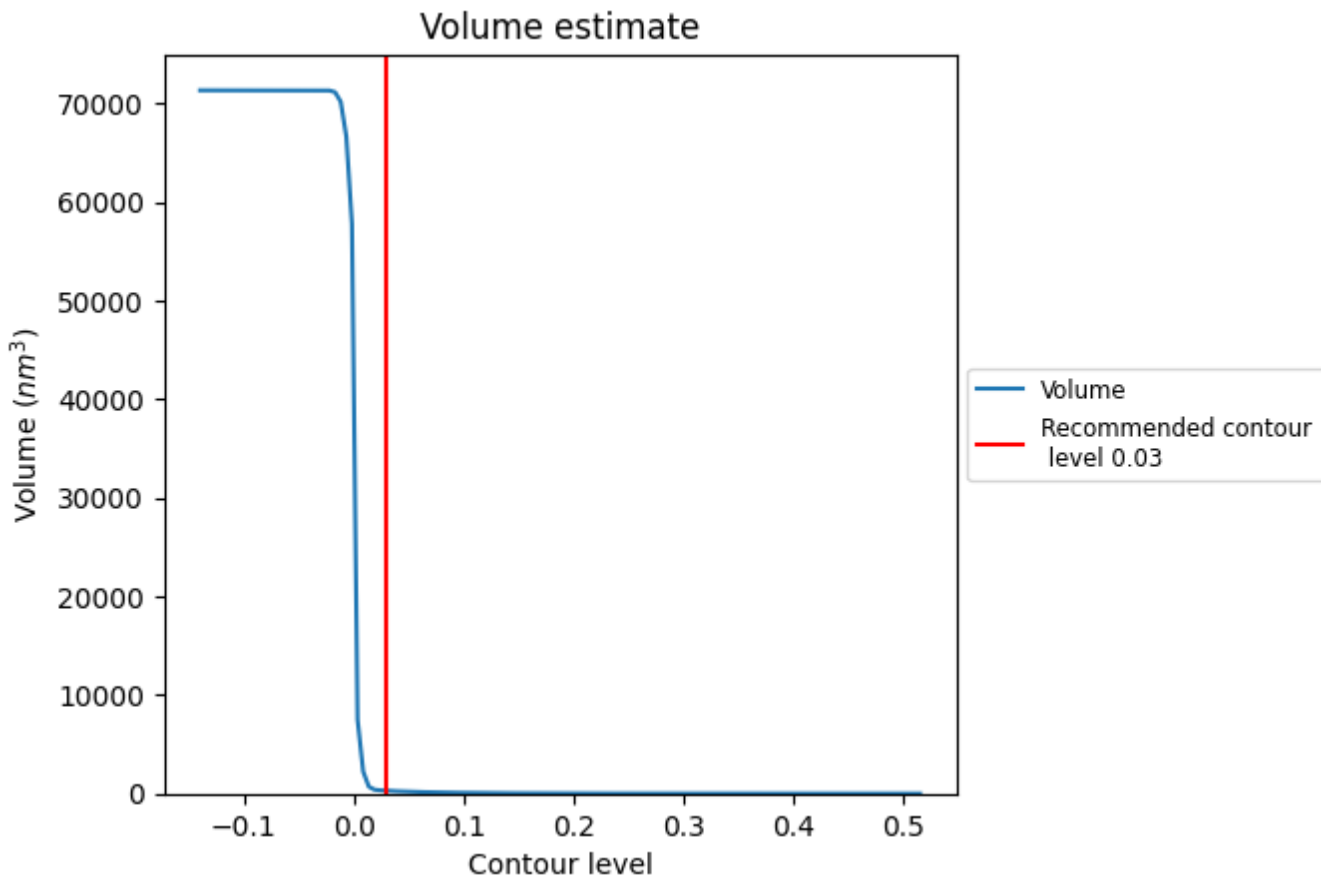

The volume at the recommended contour level is 288  $\text{nm}^3$ ; this corresponds to an approximate mass of 260 kDa.

The volume estimate graph shows how the enclosed volume varies with the contour level. The recommended contour level is shown as a vertical line and the intersection between the line and the curve gives the volume of the enclosed surface at the given level.

7.3 Rotationally averaged power spectrum 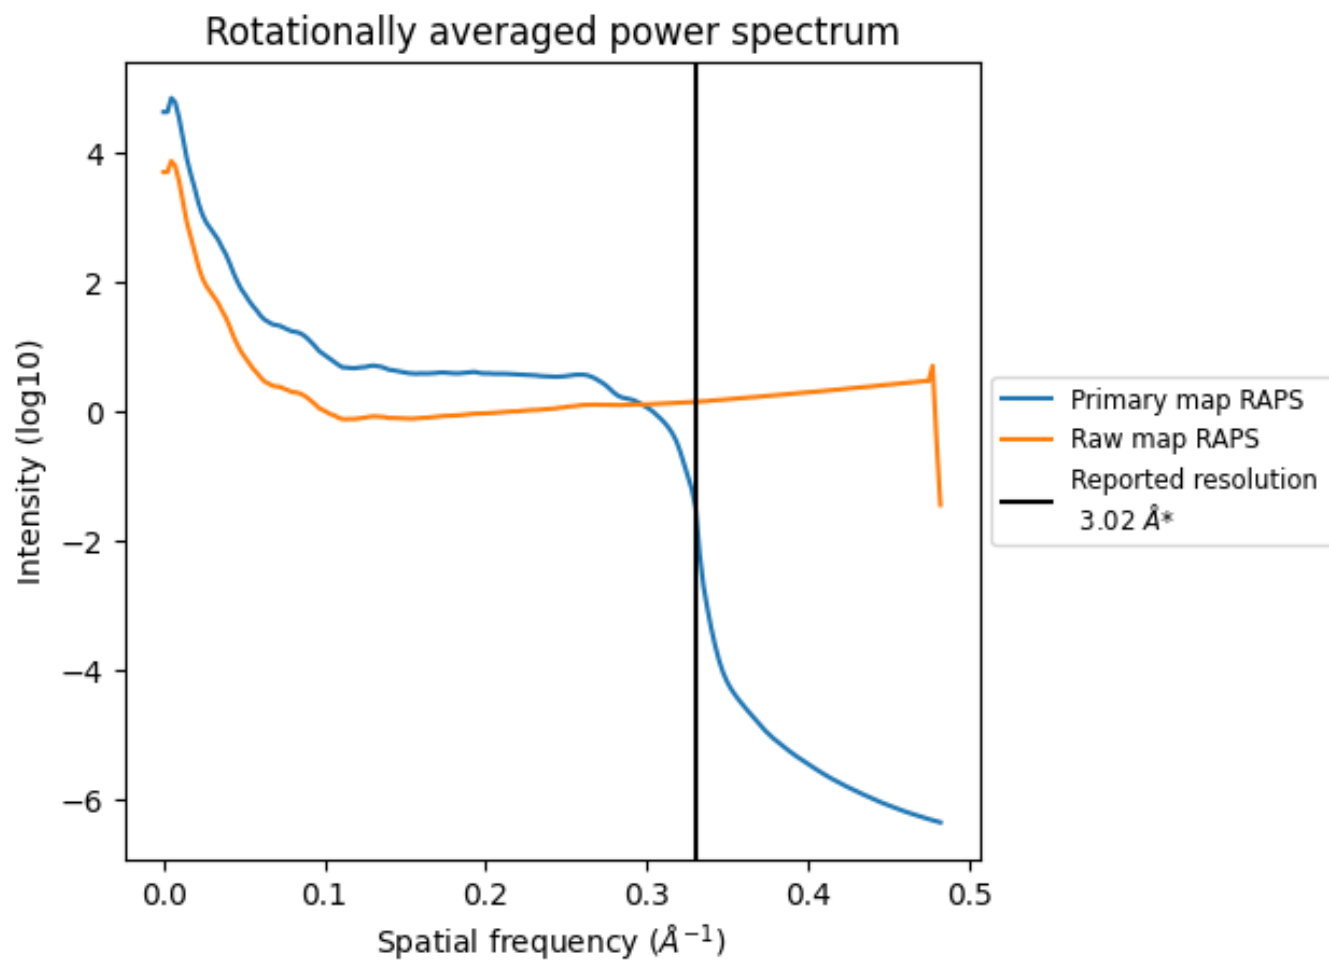

\*Reported resolution corresponds to spatial frequency of 0.331 Å<sup>-1</sup>

## 8 Fourier-Shell correlation [\(i\)](#)

Fourier-Shell Correlation (FSC) is the most commonly used method to estimate the resolution of single-particle and subtomogram-averaged maps. The shape of the curve depends on the imposed symmetry, mask and whether or not the two 3D reconstructions used were processed from a common reference. The reported resolution is shown as a black line. A curve is displayed for the half-bit criterion in addition to lines showing the 0.143 gold standard cut-off and 0.5 cut-off.

### 8.1 FSC [\(i\)](#)

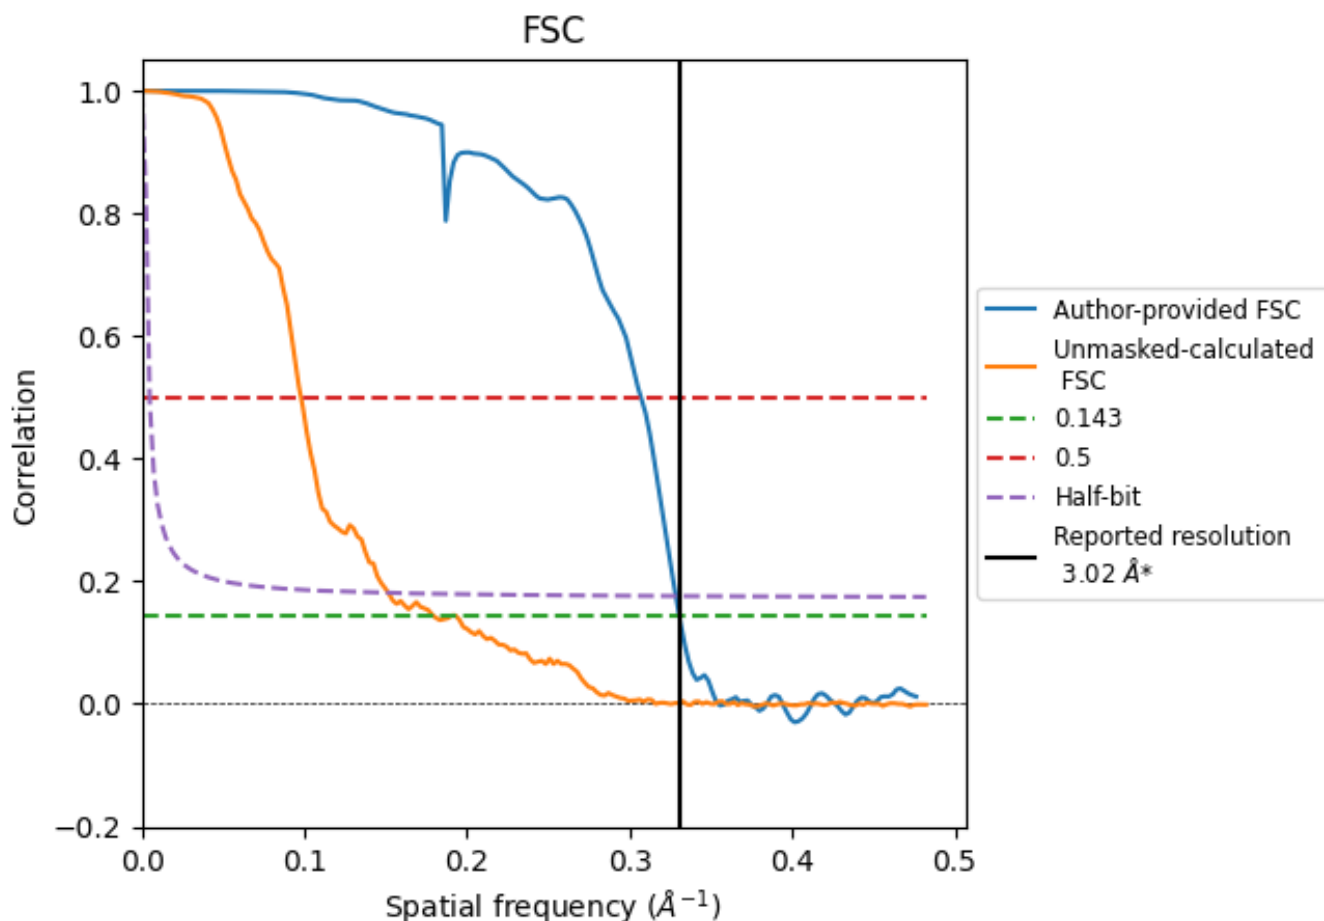

\*Reported resolution corresponds to spatial frequency of 0.331 Å<sup>-1</sup>

## 8.2 Resolution estimates [i](#)

| Resolution estimate (Å)   | Estimation criterion (FSC cut-off) |       |          |
|---------------------------|------------------------------------|-------|----------|
|                           | 0.143                              | 0.5   | Half-bit |
| Reported by author        | 3.02                               | -     | -        |
| Author-provided FSC curve | 3.02                               | 3.26  | 3.04     |
| Unmasked-calculated*      | 5.56                               | 10.22 | 6.60     |

\*Resolution estimate based on FSC curve calculated by comparison of deposited half-maps. The value from deposited half-maps intersecting FSC 0.143 CUT-OFF 5.56 differs from the reported value 3.02 by more than 10 %

## 9 Map-model fit [i](#)

This section contains information regarding the fit between EMDB map EMD-70945 and PDB model 9OWV. Per-residue inclusion information can be found in section 3 on page 4.

### 9.1 Map-model overlay [i](#)

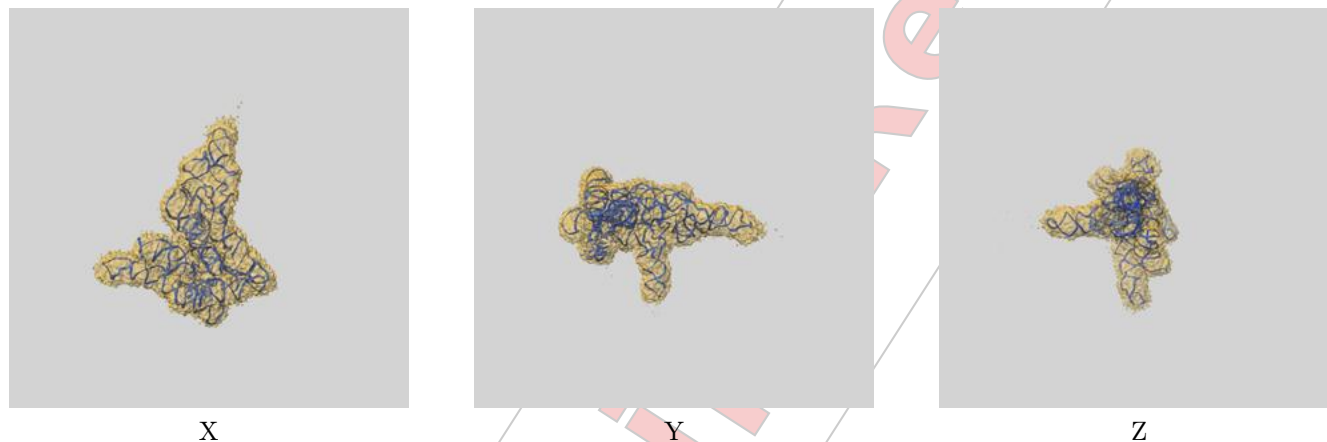

The images above show the 3D surface view of the map at the recommended contour level 0.03 at 50% transparency in yellow overlaid with a ribbon representation of the model coloured in blue. These images allow for the visual assessment of the quality of fit between the atomic model and the map.

## 9.2 Q-score mapped to coordinate model [\(i\)](#)

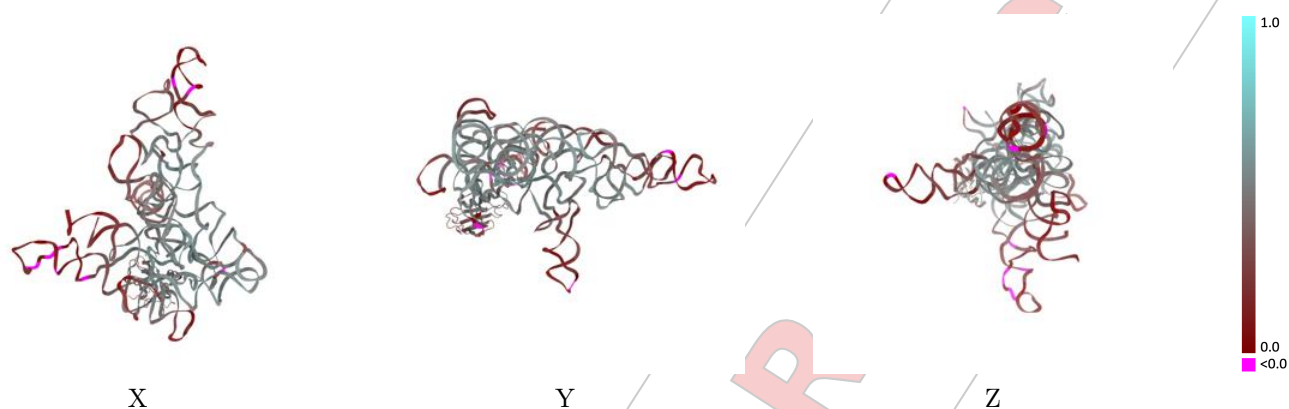

The images above show the model with each residue coloured according to its Q-score. This shows their resolvability in the map with higher Q-score values reflecting better resolvability. Please note: Q-score is calculating the resolvability of atoms, and thus high values are only expected at resolutions at which atoms can be resolved. Low Q-score values may therefore be expected for many entries.

## 9.3 Atom inclusion mapped to coordinate model [\(i\)](#)

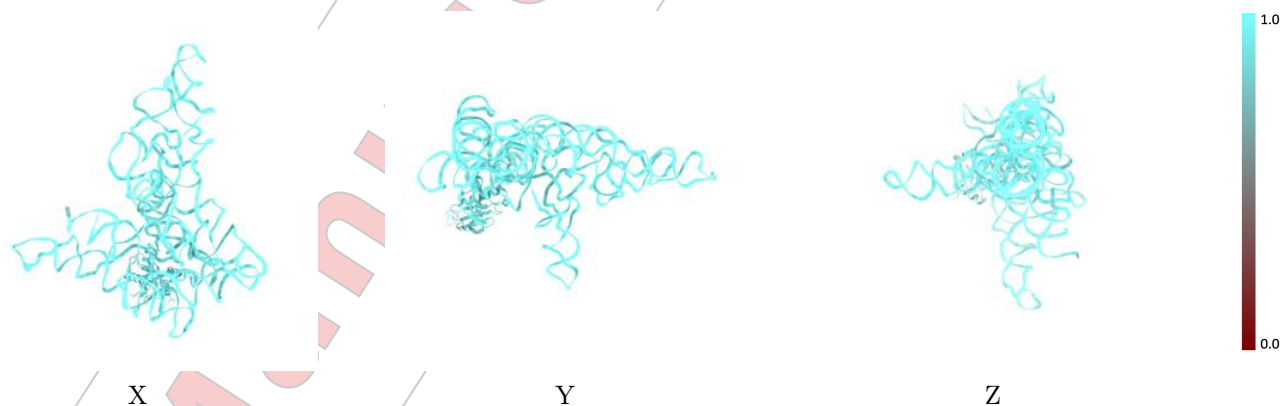

The images above show the model with each residue coloured according to its atom inclusion. This shows to what extent they are inside the map at the recommended contour level (0.03).

## 9.4 Atom inclusion [i](#)

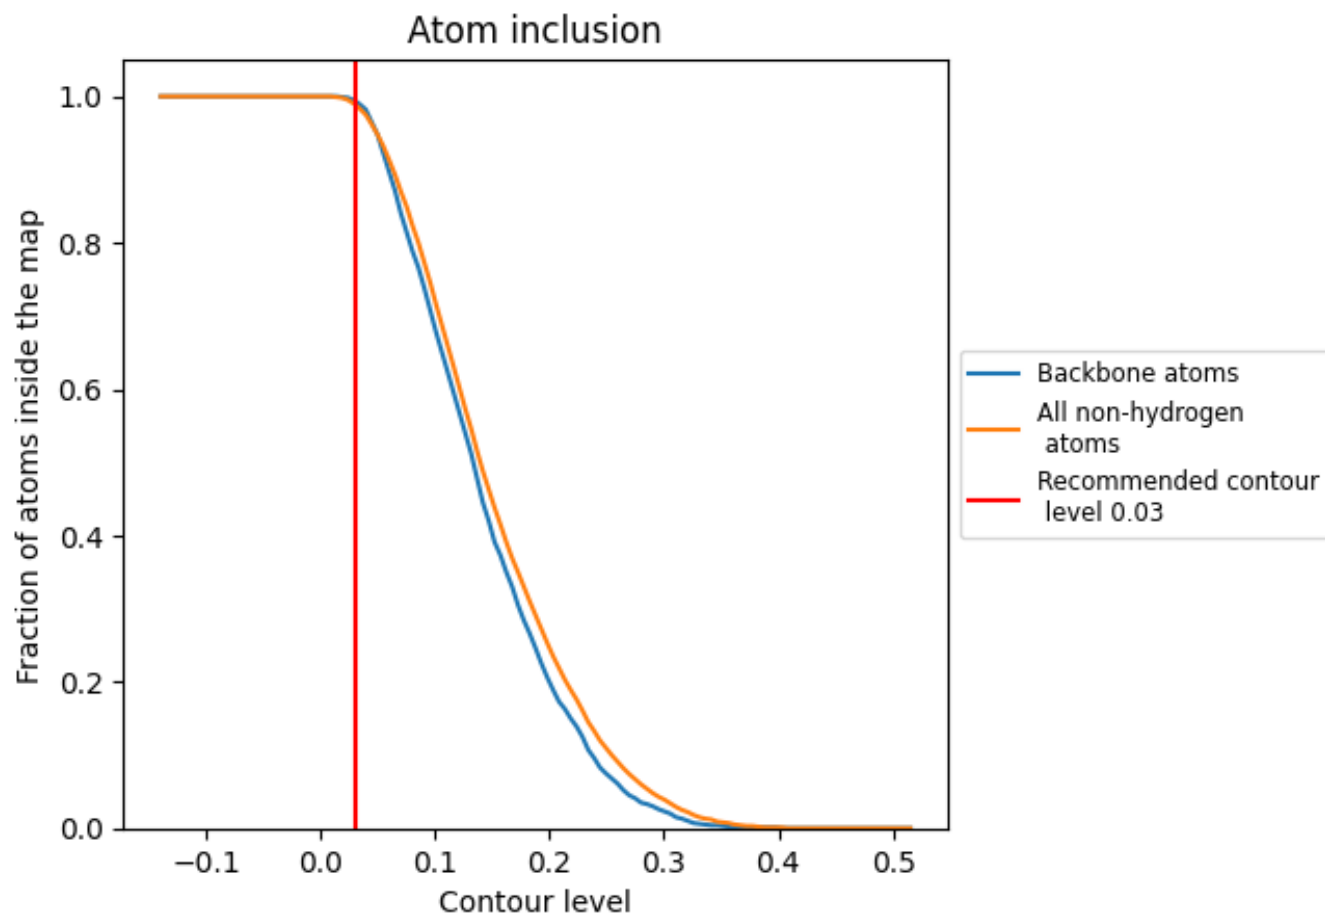

At the recommended contour level, 99% of all backbone atoms, 99% of all non-hydrogen atoms, are inside the map.

For Manuscript

## 9.5 Map-model fit summary [i](#)

The table lists the average atom inclusion at the recommended contour level (0.03) and Q-score for the entire model and for each chain.

| Chain | Atom inclusion                                                                           | Q-score                                                                                  |
|-------|------------------------------------------------------------------------------------------|------------------------------------------------------------------------------------------|
| All   |  0.9890 |  0.3890 |
| A     |  0.9950 |  0.3940 |
| B     |  0.9160 |  0.4000 |
| C     |  0.9980 |  0.3590 |





# Full wwPDB EM Validation Report i

Jun 4, 2025 – 04:29 PM EDT

PDB ID : 9OWW / pdb\_00009oww  
EMDB ID : EMD-70946  
Title : Structure of Geobacillus stearothermophilus RNase P holoenzyme in complex with the precursor tRNA with non-complementary 5' leader  
Deposited on : 2025-06-02  
Resolution : 2.83 Å (reported)  
Based on initial model : 2A64

**This wwPDB validation report is for manuscript review**

This is a Full wwPDB EM Validation Report.

This report is produced by the wwPDB biocuration pipeline after annotation of the structure.

We welcome your comments at [validation@mail.wwpdb.org](mailto:validation@mail.wwpdb.org)

A user guide is available at

<https://www.wwpdb.org/validation/2017/EMValidationReportHelp>

with specific help available everywhere you see the i symbol.

The types of validation reports are described at

<http://www.wwpdb.org/validation/2017/FAQs#types>.

---

The following versions of software and data (see [references](#) i) were used in the production of this report:

EMDB validation analysis : 0.0.1.dev118  
MolProbity : 4-5-2 with Phenix2.0rc1  
Percentile statistics : 20231227.v01 (using entries in the PDB archive December 27th 2023)  
MapQ : 1.9.13  
Ideal geometry (proteins) : Engh & Huber (2001)  
Ideal geometry (DNA, RNA) : Parkinson et al. (1996)  
Validation Pipeline (wwPDB-VP) : 2.43.1

# 1 Overall quality at a glance i

The following experimental techniques were used to determine the structure:  
*ELECTRON MICROSCOPY*

The reported resolution of this entry is 2.83 Å.

Percentile scores (ranging between 0-100) for global validation metrics of the entry are shown in the following graphic. The table shows the number of entries on which the scores are based.

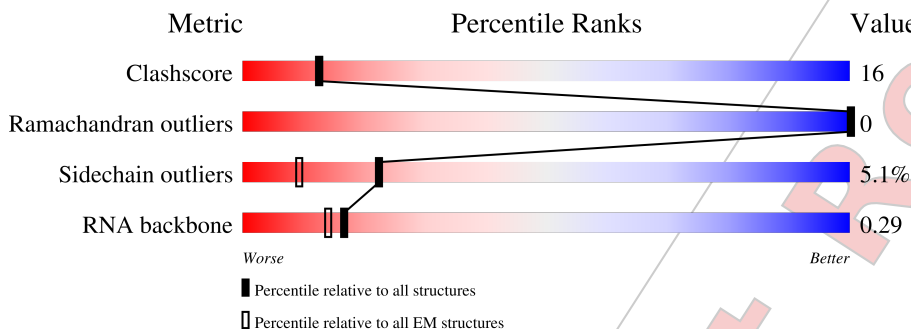

| Metric                | Whole archive (#Entries) | EM structures (#Entries) |
|-----------------------|--------------------------|--------------------------|
| Clashscore            | 210492                   | 15764                    |
| Ramachandran outliers | 207382                   | 16835                    |
| Sidechain outliers    | 206894                   | 16415                    |
| RNA backbone          | 6643                     | 2191                     |

The table below summarises the geometric issues observed across the polymeric chains and their fit to the map. The red, orange, yellow and green segments of the bar indicate the fraction of residues that contain outliers for  $\geq 3$ , 2, 1 and 0 types of geometric quality criteria respectively. A grey segment represents the fraction of residues that are not modelled. The numeric value for each fraction is indicated below the corresponding segment, with a dot representing fractions  $\leq 5\%$ . The upper red bar (where present) indicates the fraction of residues that have poor fit to the EM map (all-atom inclusion  $< 40\%$ ). The numeric value is given above the bar.

| Mol | Chain | Length | Quality of chain |
|-----|-------|--------|------------------|
| 1   | A     | 417    |                  |
| 2   | B     | 116    |                  |
| 3   | C     | 92     |                  |

## 2 Entry composition [i](#)

There are 4 unique types of molecules in this entry. The entry contains 11703 atoms, of which 0 are hydrogens and 0 are deuteriums.

In the tables below, the AltConf column contains the number of residues with at least one atom in alternate conformation and the Trace column contains the number of residues modelled with at most 2 atoms.

- Molecule 1 is a RNA chain called RNase P RNA (417-MER).

| Mol | Chain | Residues | Atoms |      |      |      |     | AltConf | Trace |
|-----|-------|----------|-------|------|------|------|-----|---------|-------|
|     |       |          | Total | C    | N    | O    | P   |         |       |
| 1   | A     | 417      | 8962  | 3996 | 1660 | 2889 | 417 | 0       | 0     |

- Molecule 2 is a protein called Ribonuclease P protein component.

| Mol | Chain | Residues | Atoms |     |     |     |   | AltConf | Trace |
|-----|-------|----------|-------|-----|-----|-----|---|---------|-------|
|     |       |          | Total | C   | N   | O   | S |         |       |
| 2   | B     | 116      | 947   | 608 | 174 | 162 | 3 | 0       | 0     |

There are 2 discrepancies between the modelled and reference sequences:

| Chain | Residue | Modelled | Actual | Comment        | Reference      |
|-------|---------|----------|--------|----------------|----------------|
| B     | 0       | GLY      | -      | expression tag | UNP A0A150N245 |
| B     | 64      | ILE      | VAL    | conflict       | UNP A0A150N245 |

- Molecule 3 is a RNA chain called precursor tRNA (89-MER).

| Mol | Chain | Residues | Atoms |     |     |     |    | AltConf | Trace |
|-----|-------|----------|-------|-----|-----|-----|----|---------|-------|
|     |       |          | Total | C   | N   | O   | P  |         |       |
| 3   | C     | 83       | 1765  | 787 | 309 | 586 | 83 | 0       | 0     |

- Molecule 4 is CALCIUM ION (CCD ID: CA) (formula: Ca) (labeled as "Ligand of Interest" by depositor).

| Mol | Chain | Residues | Atoms |    | AltConf |
|-----|-------|----------|-------|----|---------|
| 4   | A     | 29       | Total | Ca | 0       |
|     |       |          | 29    | 29 |         |

### 3 Residue-property plots

These plots are drawn for all protein, RNA, DNA and oligosaccharide chains in the entry. The first graphic for a chain summarises the proportions of the various outlier classes displayed in the second graphic. The second graphic shows the sequence view annotated by issues in geometry and atom inclusion in map density. Residues are color-coded according to the number of geometric quality criteria for which they contain at least one outlier: green = 0, yellow = 1, orange = 2 and red = 3 or more. A red diamond above a residue indicates a poor fit to the EM map for this residue (all-atom inclusion < 40%). Stretches of 2 or more consecutive residues without any outlier are shown as a green connector. Residues present in the sample, but not in the model, are shown in grey.

- Molecule 1: RNase P RNA (417-MER)

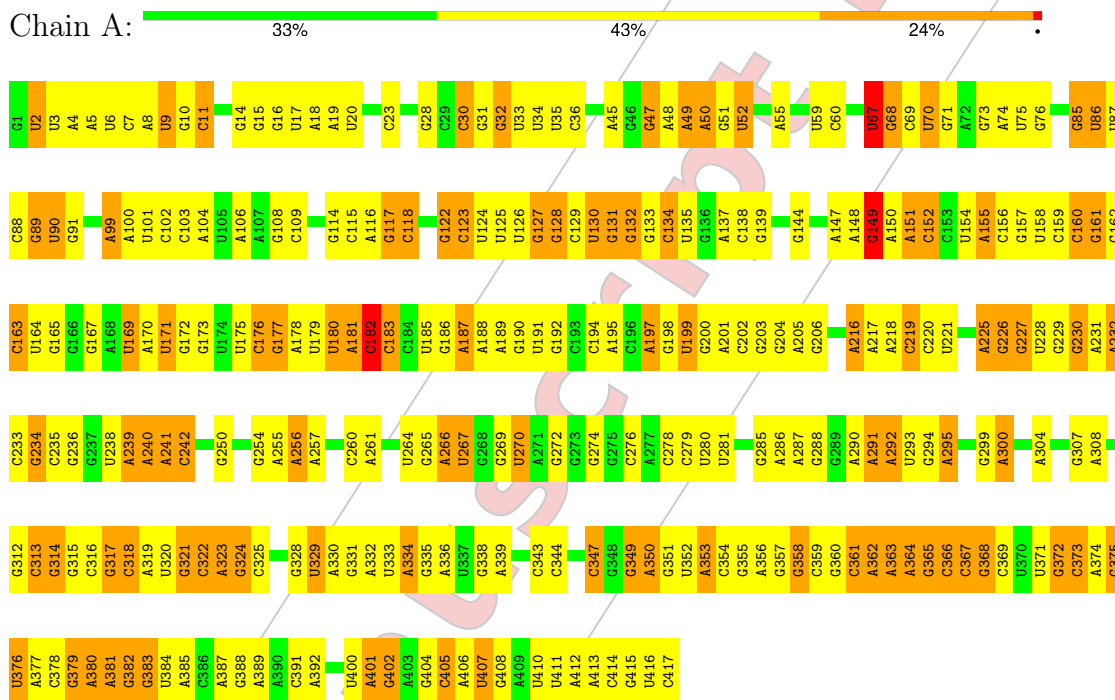

- Molecule 2: Ribonuclease P protein component

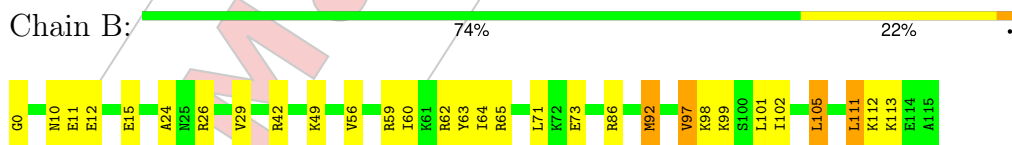

- Molecule 3: precursor tRNA (89-MER)

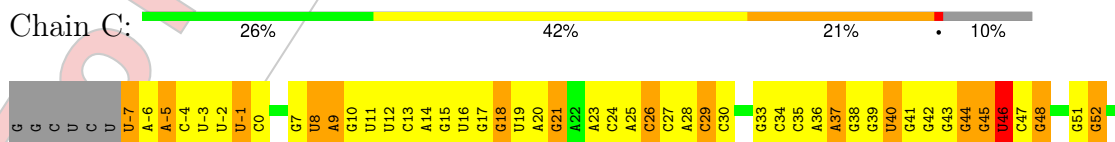

|     |     |     |     |     |     |     |     |     |     |     |     |     |   |   |   |
|-----|-----|-----|-----|-----|-----|-----|-----|-----|-----|-----|-----|-----|---|---|---|
| G58 | U59 | C60 | C61 | C62 | G63 | U64 | C65 | U66 | U72 | C73 | C74 | A75 | A | U | A |
|-----|-----|-----|-----|-----|-----|-----|-----|-----|-----|-----|-----|-----|---|---|---|

For Manuscript Review

## 4 Experimental information i

| Property                             | Value                                   | Source    |
|--------------------------------------|-----------------------------------------|-----------|
| EM reconstruction method             | SINGLE PARTICLE                         | Depositor |
| Imposed symmetry                     | POINT, Not provided                     |           |
| Number of particles used             | 113818                                  | Depositor |
| Resolution determination method      | FSC 0.143 CUT-OFF                       | Depositor |
| CTF correction method                | PHASE FLIPPING AND AMPLITUDE CORRECTION | Depositor |
| Microscope                           | FEI TALOS ARCTICA                       | Depositor |
| Voltage (kV)                         | 200                                     | Depositor |
| Electron dose ( $e^-/\text{\AA}^2$ ) | 57                                      | Depositor |
| Minimum defocus (nm)                 | 500                                     | Depositor |
| Maximum defocus (nm)                 | 1500                                    | Depositor |
| Magnification                        | Not provided                            |           |
| Image detector                       | GATAN K3 BIOQUANTUM (6k x 4k)           | Depositor |
| Maximum map value                    | 0.497                                   | Depositor |
| Minimum map value                    | -0.150                                  | Depositor |
| Average map value                    | 0.000                                   | Depositor |
| Map value standard deviation         | 0.007                                   | Depositor |
| Recommended contour level            | 0.03                                    | Depositor |
| Map size (Å)                         | 414.72, 414.72, 414.72                  | wwPDB     |
| Map dimensions                       | 400, 400, 400                           | wwPDB     |
| Map angles (°)                       | 90.0, 90.0, 90.0                        | wwPDB     |
| Pixel spacing (Å)                    | 1.0368, 1.0368, 1.0368                  | Depositor |

## 5 Model quality [i](#)

### 5.1 Standard geometry [i](#)

Bond lengths and bond angles in the following residue types are not validated in this section: CA

The Z score for a bond length (or angle) is the number of standard deviations the observed value is removed from the expected value. A bond length (or angle) with  $|Z| > 5$  is considered an outlier worth inspection. RMSZ is the root-mean-square of all Z scores of the bond lengths (or angles).

| Mol | Chain | Bond lengths |         | Bond angles |                |
|-----|-------|--------------|---------|-------------|----------------|
|     |       | RMSZ         | # Z  >5 | RMSZ        | # Z  >5        |
| 1   | A     | 0.53         | 0/10038 | 0.84        | 6/15661 (0.0%) |
| 2   | B     | 0.40         | 0/962   | 0.57        | 0/1281         |
| 3   | C     | 0.58         | 0/1970  | 0.89        | 1/3068 (0.0%)  |
| All | All   | 0.53         | 0/12970 | 0.83        | 7/20010 (0.0%) |

Chiral center outliers are detected by calculating the chiral volume of a chiral center and verifying if the center is modelled as a planar moiety or with the opposite hand. A planarity outlier is detected by checking planarity of atoms in a peptide group, atoms in a mainchain group or atoms of a sidechain that are expected to be planar.

| Mol | Chain | #Chirality outliers | #Planarity outliers |
|-----|-------|---------------------|---------------------|
| 2   | B     | 0                   | 1                   |

There are no bond length outliers.

All (7) bond angle outliers are listed below:

| Mol | Chain | Res | Type | Atoms       | Z     | Observed(°) | Ideal(°) |
|-----|-------|-----|------|-------------|-------|-------------|----------|
| 1   | A     | 405 | C    | O3'-P-O5'   | -5.94 | 95.09       | 104.00   |
| 1   | A     | 182 | C    | C4'-C3'-C2' | -5.89 | 96.71       | 102.60   |
| 1   | A     | 149 | G    | O3'-P-O5'   | -5.70 | 95.44       | 104.00   |
| 3   | C     | 46  | U    | C2'-C3'-O3' | 5.54  | 117.82      | 109.50   |
| 1   | A     | 67  | U    | O3'-P-O5'   | -5.41 | 95.88       | 104.00   |
| 1   | A     | 69  | C    | O3'-P-O5'   | 5.35  | 112.02      | 104.00   |
| 1   | A     | 240 | A    | C4'-C3'-C2' | -5.04 | 97.56       | 102.60   |

There are no chirality outliers.

All (1) planarity outliers are listed below:

| Mol | Chain | Res | Type | Group     |
|-----|-------|-----|------|-----------|
| 2   | B     | 59  | ARG  | Sidechain |

## 5.2 Too-close contacts [i](#)

In the following table, the Non-H and H(model) columns list the number of non-hydrogen atoms and hydrogen atoms in the chain respectively. The H(added) column lists the number of hydrogen atoms added and optimized by MolProbity. The Clashes column lists the number of clashes within the asymmetric unit, whereas Symm-Clashes lists symmetry-related clashes.

| Mol | Chain | Non-H | H(model) | H(added) | Clashes | Symm-Clashes |
|-----|-------|-------|----------|----------|---------|--------------|
| 1   | A     | 8962  | 0        | 4510     | 224     | 0            |
| 2   | B     | 947   | 0        | 1008     | 27      | 0            |
| 3   | C     | 1765  | 0        | 894      | 46      | 0            |
| 4   | A     | 29    | 0        | 0        | 1       | 0            |
| All | All   | 11703 | 0        | 6412     | 283     | 0            |

The all-atom clashscore is defined as the number of clashes found per 1000 atoms (including hydrogen atoms). The all-atom clashscore for this structure is 16.

All (283) close contacts within the same asymmetric unit are listed below, sorted by their clash magnitude.

| Atom-1         | Atom-2          | Interatomic distance (Å) | Clash overlap (Å) |
|----------------|-----------------|--------------------------|-------------------|
| 1:A:364:A:C4   | 1:A:365:G:H1'   | 1.96                     | 1.01              |
| 3:C:43:G:H3'   | 3:C:44:G:H3'    | 1.49                     | 0.93              |
| 1:A:226:G:C2'  | 1:A:227:G:H5'   | 2.00                     | 0.92              |
| 1:A:226:G:O2'  | 1:A:227:G:H5'   | 1.70                     | 0.90              |
| 1:A:371:U:H5'' | 1:A:372:G:H5'   | 1.54                     | 0.88              |
| 3:C:8:U:H5'    | 3:C:48:G:H5'    | 1.55                     | 0.88              |
| 1:A:349:G:H21  | 1:A:350:A:H62   | 1.24                     | 0.83              |
| 1:A:367:C:H2'  | 1:A:368:G:C8    | 2.15                     | 0.80              |
| 1:A:363:A:H2'  | 1:A:364:A:C4    | 2.13                     | 0.79              |
| 1:A:378:C:H3'  | 1:A:379:G:C8    | 2.19                     | 0.77              |
| 1:A:127:G:H2'  | 1:A:128:G:H4'   | 1.66                     | 0.77              |
| 1:A:45:A:H62   | 2:B:62:ARG:NH2  | 1.84                     | 0.77              |
| 2:B:86:ARG:NH2 | 3:C:-5:A:H4'    | 2.01                     | 0.75              |
| 1:A:45:A:C2    | 1:A:388:G:H2'   | 2.24                     | 0.73              |
| 1:A:225:A:C2'  | 1:A:226:G:H5'   | 2.18                     | 0.73              |
| 1:A:9:U:H2'    | 1:A:10:G:C8     | 2.24                     | 0.72              |
| 1:A:47:G:H1    | 1:A:385:A:H62   | 1.39                     | 0.71              |
| 2:B:63:TYR:HB3 | 2:B:97:VAL:HG11 | 1.72                     | 0.70              |
| 1:A:364:A:C5   | 1:A:365:G:H1'   | 2.27                     | 0.69              |

Continued on next page...

Continued from previous page...

| Atom-1          | Atom-2           | Interatomic distance (Å) | Clash overlap (Å) |
|-----------------|------------------|--------------------------|-------------------|
| 1:A:9:U:H2'     | 1:A:10:G:H8      | 1.58                     | 0.69              |
| 1:A:363:A:C8    | 1:A:363:A:H5''   | 2.28                     | 0.69              |
| 1:A:349:G:H22   | 1:A:379:G:H1'    | 1.58                     | 0.68              |
| 1:A:180:U:H2'   | 1:A:181:A:H8     | 1.58                     | 0.67              |
| 1:A:216:A:HO2'  | 1:A:217:A:H8     | 1.41                     | 0.67              |
| 1:A:350:A:H1'   | 1:A:380:A:C2     | 2.30                     | 0.67              |
| 1:A:169:U:H2'   | 1:A:170:A:H8     | 1.59                     | 0.66              |
| 1:A:364:A:H3'   | 1:A:365:G:O4'    | 1.95                     | 0.66              |
| 2:B:0:GLY:HA3   | 2:B:65:ARG:HB3   | 1.75                     | 0.66              |
| 1:A:349:G:N2    | 1:A:350:A:H62    | 1.93                     | 0.66              |
| 1:A:349:G:N2    | 1:A:379:G:H1'    | 2.10                     | 0.66              |
| 1:A:378:C:H3'   | 1:A:379:G:H8     | 1.59                     | 0.66              |
| 3:C:40:U:H2'    | 3:C:41:G:H8      | 1.61                     | 0.66              |
| 1:A:50:A:C8     | 1:A:50:A:H5''    | 2.31                     | 0.66              |
| 1:A:374:A:H2'   | 1:A:375:G:C8     | 2.32                     | 0.64              |
| 1:A:230:G:O6    | 4:A:529:CA:CA    | 1.75                     | 0.64              |
| 1:A:18:A:H2'    | 1:A:19:A:H8      | 1.62                     | 0.64              |
| 1:A:45:A:H62    | 2:B:62:ARG:HH22  | 1.47                     | 0.63              |
| 1:A:71:G:O2'    | 1:A:73:G:N7      | 2.31                     | 0.63              |
| 1:A:203:G:C5    | 1:A:205:A:H1'    | 2.34                     | 0.62              |
| 1:A:363:A:O3'   | 1:A:364:A:O4'    | 2.15                     | 0.62              |
| 3:C:27:C:H2'    | 3:C:28:A:C8      | 2.35                     | 0.61              |
| 2:B:56:VAL:O    | 2:B:60:ILE:HG13  | 2.00                     | 0.61              |
| 1:A:316:C:H2'   | 1:A:317:G:C8     | 2.35                     | 0.61              |
| 1:A:225:A:H2'   | 1:A:226:G:H5'    | 1.82                     | 0.60              |
| 2:B:26:ARG:CZ   | 3:C:-7:U:H3'     | 2.31                     | 0.60              |
| 2:B:49:LYS:HD2  | 3:C:-1:U:H5'     | 1.82                     | 0.60              |
| 1:A:3:U:H2'     | 1:A:4:A:C8       | 2.36                     | 0.60              |
| 1:A:18:A:H2'    | 1:A:19:A:C8      | 2.37                     | 0.60              |
| 1:A:266:A:H2'   | 1:A:267:U:H5'    | 1.84                     | 0.60              |
| 1:A:350:A:H1'   | 1:A:380:A:N1     | 2.17                     | 0.59              |
| 2:B:86:ARG:HH21 | 3:C:-5:A:H4'     | 1.66                     | 0.59              |
| 1:A:3:U:H2'     | 1:A:4:A:H8       | 1.68                     | 0.59              |
| 1:A:379:G:H4'   | 1:A:380:A:H8     | 1.66                     | 0.59              |
| 1:A:229:G:N2    | 1:A:231:A:H3'    | 2.17                     | 0.59              |
| 1:A:32:G:H22    | 1:A:34:U:H1'     | 1.67                     | 0.59              |
| 1:A:130:U:H2'   | 1:A:131:G:C8     | 2.38                     | 0.59              |
| 2:B:12:GLU:HG2  | 2:B:42:ARG:HH22  | 1.67                     | 0.59              |
| 1:A:226:G:H2'   | 1:A:227:G:H5'    | 1.82                     | 0.59              |
| 2:B:64:ILE:HG23 | 2:B:101:LEU:HD21 | 1.84                     | 0.59              |
| 1:A:360:G:N2    | 1:A:363:A:H5''   | 2.18                     | 0.58              |

Continued on next page...

Continued from previous page...

| Atom-1         | Atom-2          | Interatomic distance (Å) | Clash overlap (Å) |
|----------------|-----------------|--------------------------|-------------------|
| 1:A:10:G:H2'   | 1:A:11:C:C6     | 2.37                     | 0.58              |
| 1:A:379:G:H4'  | 1:A:380:A:C8    | 2.37                     | 0.58              |
| 1:A:14:G:H2'   | 1:A:385:A:N1    | 2.19                     | 0.58              |
| 1:A:364:A:OP1  | 1:A:365:G:N7    | 2.35                     | 0.58              |
| 1:A:360:G:H22  | 1:A:363:A:H5''  | 1.68                     | 0.57              |
| 3:C:40:U:H2'   | 3:C:41:G:C8     | 2.38                     | 0.57              |
| 3:C:38:G:H2'   | 3:C:39:G:C8     | 2.40                     | 0.57              |
| 1:A:6:U:H2'    | 1:A:7:C:C6      | 2.40                     | 0.57              |
| 1:A:2:U:H2'    | 1:A:3:U:C6      | 2.40                     | 0.56              |
| 1:A:67:U:H4'   | 1:A:68:G:OP1    | 2.06                     | 0.56              |
| 1:A:199:U:H5   | 1:A:206:G:H1'   | 1.70                     | 0.56              |
| 1:A:315:G:H2'  | 1:A:316:C:C6    | 2.40                     | 0.56              |
| 1:A:308:A:N1   | 1:A:329:U:H5    | 2.04                     | 0.56              |
| 1:A:364:A:H3'  | 1:A:364:A:OP2   | 2.05                     | 0.56              |
| 1:A:229:G:H22  | 1:A:232:A:P     | 2.28                     | 0.56              |
| 2:B:92:MET:HB3 | 2:B:97:VAL:HG23 | 1.88                     | 0.56              |
| 3:C:26:C:H2'   | 3:C:27:C:C6     | 2.41                     | 0.56              |
| 1:A:412:A:H2'  | 1:A:413:A:C8    | 2.42                     | 0.55              |
| 1:A:5:A:H2'    | 1:A:6:U:C6      | 2.41                     | 0.55              |
| 1:A:4:A:H2'    | 1:A:5:A:H8      | 1.70                     | 0.55              |
| 1:A:8:A:C2'    | 1:A:9:U:H5'     | 2.36                     | 0.55              |
| 1:A:307:G:H2'  | 1:A:308:A:H8    | 1.70                     | 0.55              |
| 1:A:5:A:H2'    | 1:A:6:U:H6      | 1.71                     | 0.55              |
| 1:A:360:G:H22  | 1:A:363:A:C5'   | 2.19                     | 0.55              |
| 1:A:7:C:H2'    | 1:A:8:A:H8      | 1.72                     | 0.55              |
| 1:A:144:G:H1   | 1:A:182:C:H42   | 1.55                     | 0.54              |
| 1:A:364:A:OP2  | 1:A:365:G:O4'   | 2.21                     | 0.54              |
| 2:B:26:ARG:NH2 | 3:C:-7:U:H3'    | 2.21                     | 0.54              |
| 1:A:59:U:H2'   | 1:A:60:C:C6     | 2.42                     | 0.54              |
| 1:A:154:U:H2'  | 1:A:155:A:C4    | 2.42                     | 0.54              |
| 1:A:186:G:H8   | 1:A:186:G:H5''  | 1.73                     | 0.54              |
| 1:A:85:G:O2'   | 1:A:87:U:O4     | 2.26                     | 0.54              |
| 1:A:364:A:C3'  | 1:A:365:G:O4'   | 2.56                     | 0.53              |
| 3:C:42:G:H2'   | 3:C:43:G:C8     | 2.43                     | 0.53              |
| 1:A:414:C:H2'  | 1:A:415:G:H8    | 1.72                     | 0.53              |
| 1:A:199:U:C5   | 1:A:206:G:H1'   | 2.43                     | 0.53              |
| 1:A:363:A:H5'' | 1:A:363:A:H8    | 1.74                     | 0.53              |
| 1:A:4:A:H2'    | 1:A:5:A:C8      | 2.44                     | 0.52              |
| 1:A:264:U:H2'  | 1:A:265:G:O4'   | 2.09                     | 0.52              |
| 1:A:99:A:H2'   | 1:A:100:A:C8    | 2.44                     | 0.52              |
| 1:A:349:G:O6   | 1:A:379:G:N2    | 2.42                     | 0.52              |

Continued on next page...

Continued from previous page...

| Atom-1        | Atom-2         | Interatomic distance (Å) | Clash overlap (Å) |
|---------------|----------------|--------------------------|-------------------|
| 1:A:6:U:H2'   | 1:A:7:C:H6     | 1.74                     | 0.52              |
| 3:C:8:U:H5'   | 3:C:48:G:C5'   | 2.35                     | 0.52              |
| 1:A:122:G:H3' | 1:A:123:C:H5'' | 1.90                     | 0.52              |
| 1:A:70:U:H2'  | 1:A:71:G:O4'   | 2.10                     | 0.51              |
| 1:A:10:G:H2'  | 1:A:11:C:H6    | 1.74                     | 0.51              |
| 1:A:49:A:N1   | 1:A:387:A:O2'  | 2.37                     | 0.51              |
| 1:A:124:U:H2' | 1:A:125:U:O4'  | 2.11                     | 0.51              |
| 1:A:216:A:O2' | 1:A:217:A:H8   | 1.93                     | 0.51              |
| 1:A:23:C:O2   | 1:A:336:A:O2'  | 2.28                     | 0.51              |
| 3:C:43:G:C3'  | 3:C:44:G:H3'   | 2.33                     | 0.51              |
| 3:C:42:G:C3'  | 3:C:43:G:H8    | 2.23                     | 0.51              |
| 1:A:128:G:H2' | 1:A:129:C:C6   | 2.46                     | 0.51              |
| 1:A:71:G:N2   | 1:A:73:G:H3'   | 2.26                     | 0.50              |
| 1:A:361:C:O2' | 1:A:362:A:H3'  | 2.12                     | 0.50              |
| 1:A:307:G:H2' | 1:A:308:A:C8   | 2.46                     | 0.50              |
| 1:A:363:A:O2' | 1:A:364:A:C1'  | 2.60                     | 0.50              |
| 1:A:317:G:N1  | 1:A:321:G:C2   | 2.80                     | 0.50              |
| 3:C:-5:A:N3   | 3:C:-5:A:H2'   | 2.25                     | 0.50              |
| 1:A:219:C:H2' | 1:A:220:C:H6   | 1.76                     | 0.49              |
| 3:C:29:C:H2'  | 3:C:30:C:C6    | 2.47                     | 0.49              |
| 1:A:161:G:H4' | 1:A:163:C:C5   | 2.48                     | 0.49              |
| 1:A:356:A:H3' | 1:A:357:G:H8   | 1.77                     | 0.49              |
| 1:A:266:A:C2' | 1:A:267:U:H5'  | 2.43                     | 0.49              |
| 1:A:115:C:H2' | 1:A:116:A:C8   | 2.48                     | 0.49              |
| 1:A:241:A:H2' | 1:A:242:C:C6   | 2.47                     | 0.49              |
| 1:A:385:A:H8  | 1:A:400:U:HO2' | 1.61                     | 0.49              |
| 3:C:43:G:H3'  | 3:C:44:G:C3'   | 2.34                     | 0.49              |
| 1:A:373:C:H2' | 1:A:374:A:C8   | 2.47                     | 0.49              |
| 1:A:89:G:H2'  | 1:A:90:U:C6    | 2.48                     | 0.48              |
| 1:A:280:U:H2' | 1:A:281:U:C6   | 2.48                     | 0.48              |
| 1:A:180:U:O2' | 1:A:181:A:H5'  | 2.13                     | 0.48              |
| 1:A:19:A:H2'  | 1:A:20:U:C6    | 2.48                     | 0.48              |
| 1:A:360:G:H1' | 1:A:365:G:N2   | 2.29                     | 0.48              |
| 1:A:52:U:H5   | 3:C:65:C:H41   | 1.62                     | 0.48              |
| 1:A:148:A:H3' | 1:A:149:G:H8   | 1.77                     | 0.48              |
| 1:A:186:G:N2  | 1:A:188:A:H3'  | 2.28                     | 0.48              |
| 1:A:132:G:H3' | 1:A:133:G:H8   | 1.79                     | 0.48              |
| 1:A:349:G:H4' | 1:A:350:A:H5'  | 1.94                     | 0.48              |
| 1:A:178:A:OP1 | 1:A:180:U:H1'  | 2.14                     | 0.47              |
| 1:A:371:U:H4' | 1:A:373:C:H5   | 1.79                     | 0.47              |
| 1:A:169:U:H2' | 1:A:170:A:C8   | 2.43                     | 0.47              |

Continued on next page...

Continued from previous page...

| Atom-1           | Atom-2          | Interatomic distance (Å) | Clash overlap (Å) |
|------------------|-----------------|--------------------------|-------------------|
| 1:A:335:G:C8     | 1:A:335:G:H3'   | 2.50                     | 0.47              |
| 1:A:30:C:H2'     | 1:A:31:G:C8     | 2.49                     | 0.47              |
| 1:A:160:C:O2     | 1:A:167:G:N1    | 2.47                     | 0.47              |
| 1:A:176:C:H2'    | 1:A:177:G:C8    | 2.50                     | 0.47              |
| 1:A:354:C:H2'    | 1:A:355:G:C8    | 2.49                     | 0.47              |
| 1:A:411:U:H2'    | 1:A:412:A:C8    | 2.49                     | 0.47              |
| 1:A:130:U:H2'    | 1:A:131:G:H8    | 1.78                     | 0.47              |
| 1:A:347:C:H1'    | 1:A:383:G:N2    | 2.29                     | 0.47              |
| 1:A:338:G:H2'    | 1:A:339:A:H8    | 1.80                     | 0.47              |
| 1:A:7:C:H2'      | 1:A:8:A:C8      | 2.49                     | 0.47              |
| 1:A:71:G:H1'     | 1:A:291:A:H61   | 1.80                     | 0.47              |
| 1:A:338:G:H2'    | 1:A:339:A:C8    | 2.49                     | 0.47              |
| 1:A:198:G:N2     | 1:A:200:G:H3'   | 2.30                     | 0.46              |
| 1:A:350:A:C1'    | 1:A:380:A:N1    | 2.78                     | 0.46              |
| 1:A:352:U:H2'    | 1:A:353:A:C8    | 2.51                     | 0.46              |
| 3:C:27:C:H2'     | 3:C:28:A:H8     | 1.80                     | 0.46              |
| 3:C:60:C:H2'     | 3:C:61:C:H6     | 1.80                     | 0.46              |
| 1:A:280:U:H2'    | 1:A:281:U:H6    | 1.79                     | 0.46              |
| 1:A:319:A:H1'    | 1:A:320:U:C5    | 2.51                     | 0.46              |
| 1:A:194:C:H5''   | 1:A:195:A:O4'   | 2.16                     | 0.46              |
| 2:B:112:LYS:O    | 2:B:113:LYS:C   | 2.58                     | 0.46              |
| 3:C:24:C:H2'     | 3:C:25:A:C8     | 2.51                     | 0.46              |
| 1:A:195:A:H1'    | 3:C:18:G:C5     | 2.50                     | 0.46              |
| 1:A:376:U:H2'    | 1:A:377:A:C8    | 2.49                     | 0.46              |
| 3:C:25:A:H2      | 3:C:43:G:H22    | 1.64                     | 0.46              |
| 2:B:24:ALA:HB2   | 2:B:29:VAL:HG13 | 1.98                     | 0.45              |
| 1:A:285:G:O2'    | 1:A:300:A:N6    | 2.49                     | 0.45              |
| 3:C:14:A:C2      | 3:C:21:G:H1'    | 2.51                     | 0.45              |
| 3:C:37:A:H2'     | 3:C:38:G:C8     | 2.51                     | 0.45              |
| 1:A:234:G:H2'    | 1:A:236:G:H5'   | 1.98                     | 0.45              |
| 2:B:111:LEU:C    | 2:B:113:LYS:N   | 2.72                     | 0.45              |
| 1:A:103:C:H3'    | 1:A:104:A:H8    | 1.82                     | 0.45              |
| 1:A:180:U:H2'    | 1:A:181:A:C8    | 2.45                     | 0.45              |
| 1:A:416:U:H2'    | 1:A:417:C:O4'   | 2.17                     | 0.45              |
| 1:A:32:G:H2'     | 1:A:32:G:N3     | 2.32                     | 0.45              |
| 1:A:86:U:H2'     | 1:A:87:U:O4'    | 2.17                     | 0.45              |
| 1:A:267:U:C2     | 3:C:75:A:C2     | 3.05                     | 0.45              |
| 1:A:360:G:H3'    | 1:A:361:C:H6    | 1.82                     | 0.45              |
| 2:B:111:LEU:HD22 | 2:B:111:LEU:HA  | 1.80                     | 0.44              |
| 1:A:219:C:H2'    | 1:A:220:C:C6    | 2.52                     | 0.44              |
| 1:A:331:G:H4'    | 1:A:332:A:H5'   | 1.99                     | 0.44              |

Continued on next page...

Continued from previous page...

| Atom-1           | Atom-2         | Interatomic distance (Å) | Clash overlap (Å) |
|------------------|----------------|--------------------------|-------------------|
| 1:A:269:G:C2'    | 1:A:270:U:H5'  | 2.47                     | 0.44              |
| 1:A:363:A:O2'    | 1:A:364:A:O4'  | 2.33                     | 0.44              |
| 3:C:34:C:H2'     | 3:C:35:C:H6    | 1.83                     | 0.44              |
| 1:A:364:A:H2'    | 1:A:365:G:O4'  | 2.18                     | 0.44              |
| 1:A:32:G:N2      | 1:A:34:U:H1'   | 2.32                     | 0.44              |
| 1:A:380:A:H2'    | 1:A:380:A:N3   | 2.32                     | 0.44              |
| 1:A:17:U:H2'     | 1:A:18:A:H8    | 1.82                     | 0.44              |
| 1:A:365:G:N3     | 1:A:365:G:H2'  | 2.33                     | 0.44              |
| 1:A:114:G:H2'    | 1:A:115:C:C6   | 2.52                     | 0.44              |
| 2:B:99:LYS:HD3   | 2:B:99:LYS:O   | 2.17                     | 0.44              |
| 1:A:147:A:H2'    | 1:A:148:A:C8   | 2.53                     | 0.43              |
| 1:A:197:A:H2'    | 1:A:228:U:O2'  | 2.18                     | 0.43              |
| 1:A:217:A:H2'    | 1:A:218:A:O4'  | 2.19                     | 0.43              |
| 1:A:225:A:C3'    | 1:A:226:G:H5'  | 2.48                     | 0.43              |
| 1:A:355:G:H2'    | 1:A:356:A:C8   | 2.53                     | 0.43              |
| 1:A:350:A:C8     | 1:A:380:A:C6   | 3.06                     | 0.43              |
| 2:B:11:GLU:O     | 2:B:15:GLU:HG3 | 2.19                     | 0.43              |
| 3:C:45:G:O2'     | 3:C:46:U:O4'   | 2.37                     | 0.43              |
| 1:A:382:G:H2'    | 1:A:383:G:O4'  | 2.18                     | 0.43              |
| 1:A:414:C:H2'    | 1:A:415:G:C8   | 2.53                     | 0.43              |
| 3:C:-5:A:N3      | 3:C:-5:A:H5''  | 2.33                     | 0.43              |
| 1:A:123:C:H2'    | 1:A:124:U:O4'  | 2.18                     | 0.43              |
| 1:A:294:G:H2'    | 1:A:295:A:C8   | 2.53                     | 0.43              |
| 2:B:111:LEU:C    | 2:B:113:LYS:H  | 2.25                     | 0.43              |
| 1:A:317:G:C5     | 1:A:318:C:N3   | 2.86                     | 0.43              |
| 1:A:128:G:H2'    | 1:A:129:C:H6   | 1.83                     | 0.43              |
| 2:B:49:LYS:CD    | 3:C:-1:U:H5'   | 2.48                     | 0.43              |
| 2:B:105:LEU:HD12 | 2:B:105:LEU:HA | 1.80                     | 0.43              |
| 1:A:313:C:H2'    | 1:A:314:G:C8   | 2.54                     | 0.43              |
| 2:B:12:GLU:HG2   | 2:B:42:ARG:NH2 | 2.32                     | 0.43              |
| 1:A:324:G:H2'    | 1:A:325:C:H6   | 1.85                     | 0.42              |
| 3:C:16:U:H5      | 3:C:58:G:O6    | 2.02                     | 0.42              |
| 3:C:16:U:C5      | 3:C:58:G:O6    | 2.72                     | 0.42              |
| 1:A:17:U:H2'     | 1:A:18:A:C8    | 2.55                     | 0.42              |
| 1:A:89:G:H2'     | 1:A:90:U:H6    | 1.85                     | 0.42              |
| 1:A:186:G:H5''   | 1:A:186:G:C8   | 2.51                     | 0.42              |
| 1:A:358:G:H1     | 1:A:366:C:H42  | 1.66                     | 0.42              |
| 1:A:363:A:C2'    | 1:A:364:A:C1'  | 2.93                     | 0.42              |
| 1:A:220:C:H2'    | 1:A:221:U:H6   | 1.85                     | 0.42              |
| 1:A:334:A:H62    | 2:B:10:ASN:ND2 | 2.17                     | 0.42              |
| 1:A:200:G:N3     | 1:A:205:A:H2   | 2.17                     | 0.42              |

Continued on next page...

Continued from previous page...

| Atom-1        | Atom-2           | Interatomic distance (Å) | Clash overlap (Å) |
|---------------|------------------|--------------------------|-------------------|
| 1:A:380:A:C2  | 1:A:381:A:H1'    | 2.54                     | 0.42              |
| 1:A:85:G:H4'  | 1:A:85:G:OP1     | 2.19                     | 0.42              |
| 2:B:73:GLU:N  | 2:B:73:GLU:OE1   | 2.52                     | 0.42              |
| 3:C:65:C:H2'  | 3:C:66:U:C6      | 2.55                     | 0.42              |
| 1:A:8:A:H2'   | 1:A:9:U:H5'      | 2.02                     | 0.42              |
| 1:A:265:G:H4' | 1:A:267:U:O2     | 2.19                     | 0.42              |
| 1:A:322:C:H2' | 1:A:323:A:C8     | 2.55                     | 0.42              |
| 2:B:98:LYS:O  | 2:B:102:ILE:HD13 | 2.19                     | 0.42              |
| 3:C:-6:A:N3   | 3:C:-6:A:H2'     | 2.35                     | 0.42              |
| 1:A:199:U:O2  | 1:A:199:U:O4'    | 2.38                     | 0.42              |
| 1:A:279:C:H2' | 1:A:280:U:C6     | 2.55                     | 0.42              |
| 1:A:279:C:H2' | 1:A:280:U:H6     | 1.85                     | 0.42              |
| 1:A:364:A:H3' | 1:A:364:A:P      | 2.60                     | 0.42              |
| 3:C:51:G:N2   | 3:C:52:G:H1'     | 2.35                     | 0.42              |
| 1:A:354:C:H2' | 1:A:355:G:O4'    | 2.19                     | 0.41              |
| 1:A:349:G:N2  | 1:A:378:C:C2     | 2.88                     | 0.41              |
| 1:A:406:A:H2' | 1:A:407:U:O4'    | 2.20                     | 0.41              |
| 1:A:117:G:H3' | 1:A:118:C:H6     | 1.86                     | 0.41              |
| 1:A:239:A:H4' | 1:A:241:A:H5'    | 2.02                     | 0.41              |
| 1:A:287:A:H3' | 1:A:288:G:H8     | 1.86                     | 0.41              |
| 1:A:335:G:C8  | 1:A:335:G:C3'    | 3.03                     | 0.41              |
| 3:C:40:U:C2   | 3:C:41:G:C8      | 3.08                     | 0.41              |
| 3:C:42:G:C3'  | 3:C:43:G:C8      | 3.03                     | 0.41              |
| 1:A:134:C:H2' | 1:A:135:U:C6     | 2.55                     | 0.41              |
| 1:A:182:C:C2' | 1:A:183:C:H5'    | 2.50                     | 0.41              |
| 1:A:321:G:H2' | 1:A:322:C:C6     | 2.55                     | 0.41              |
| 1:A:335:G:H3' | 1:A:335:G:H8     | 1.85                     | 0.41              |
| 1:A:144:G:H1  | 1:A:182:C:N4     | 2.19                     | 0.41              |
| 1:A:260:C:H2' | 1:A:261:A:O4'    | 2.20                     | 0.41              |
| 1:A:334:A:H62 | 2:B:10:ASN:HD22  | 1.68                     | 0.41              |
| 1:A:350:A:C4  | 1:A:380:A:C4     | 3.09                     | 0.41              |
| 1:A:186:G:N1  | 1:A:189:A:OP2    | 2.47                     | 0.41              |
| 1:A:353:A:H2' | 1:A:354:C:O4'    | 2.21                     | 0.41              |
| 1:A:220:C:H2' | 1:A:221:U:C6     | 2.56                     | 0.41              |
| 1:A:256:A:H62 | 3:C:0:C:N4       | 2.19                     | 0.41              |
| 1:A:115:C:H2' | 1:A:116:A:H8     | 1.85                     | 0.41              |
| 1:A:151:A:H2' | 1:A:152:C:O4'    | 2.21                     | 0.41              |
| 1:A:187:A:H2' | 1:A:188:A:C8     | 2.56                     | 0.41              |
| 1:A:266:A:H2' | 1:A:266:A:N3     | 2.36                     | 0.41              |
| 1:A:292:A:C5  | 1:A:293:U:C5     | 3.08                     | 0.41              |
| 1:A:377:A:H3' | 1:A:378:C:H6     | 1.85                     | 0.41              |

Continued on next page...

Continued from previous page...

| Atom-1        | Atom-2        | Interatomic distance (Å) | Clash overlap (Å) |
|---------------|---------------|--------------------------|-------------------|
| 1:A:380:A:C2  | 1:A:381:A:N9  | 2.89                     | 0.41              |
| 3:C:35:C:H2'  | 3:C:36:A:O4'  | 2.20                     | 0.41              |
| 3:C:42:G:H3'  | 3:C:43:G:H8   | 1.85                     | 0.41              |
| 3:C:60:C:H2'  | 3:C:61:C:C6   | 2.56                     | 0.41              |
| 1:A:286:A:N6  | 1:A:299:G:H1' | 2.36                     | 0.41              |
| 1:A:2:U:H2'   | 1:A:3:U:H6    | 1.84                     | 0.40              |
| 1:A:16:G:N2   | 1:A:344:C:H1' | 2.36                     | 0.40              |
| 1:A:180:U:C2' | 1:A:181:A:H5' | 2.51                     | 0.40              |
| 1:A:350:A:C4  | 1:A:380:A:C5  | 3.09                     | 0.40              |
| 1:A:356:A:H3' | 1:A:357:G:C8  | 2.56                     | 0.40              |
| 1:A:401:A:H2' | 1:A:402:G:O4' | 2.20                     | 0.40              |
| 3:C:9:A:N3    | 3:C:44:G:H1'  | 2.35                     | 0.40              |
| 1:A:385:A:C8  | 1:A:400:U:O2' | 2.74                     | 0.40              |
| 3:C:29:C:H2'  | 3:C:30:C:H6   | 1.85                     | 0.40              |
| 1:A:170:A:H3' | 1:A:171:U:H6  | 1.86                     | 0.40              |
| 1:A:352:U:H2' | 1:A:353:A:H8  | 1.86                     | 0.40              |
| 1:A:8:A:O2'   | 1:A:9:U:H5'   | 2.21                     | 0.40              |
| 3:C:72:U:H2'  | 3:C:73:C:O4'  | 2.21                     | 0.40              |

There are no symmetry-related clashes.

### 5.3 Torsion angles [i](#)

#### 5.3.1 Protein backbone [i](#)

In the following table, the Percentiles column shows the percent Ramachandran outliers of the chain as a percentile score with respect to all PDB entries followed by that with respect to all EM entries.

The Analysed column shows the number of residues for which the backbone conformation was analysed, and the total number of residues.

| Mol | Chain | Analysed      | Favoured  | Allowed | Outliers | Percentiles           |
|-----|-------|---------------|-----------|---------|----------|-----------------------|
| 2   | B     | 114/116 (98%) | 110 (96%) | 4 (4%)  | 0        | <b>100</b> <b>100</b> |

There are no Ramachandran outliers to report.

#### 5.3.2 Protein sidechains [i](#)

In the following table, the Percentiles column shows the percent sidechain outliers of the chain as a percentile score with respect to all PDB entries followed by that with respect to all EM

entries.

The Analysed column shows the number of residues for which the sidechain conformation was analysed, and the total number of residues.

| Mol | Chain | Analysed     | Rotameric | Outliers | Percentiles |
|-----|-------|--------------|-----------|----------|-------------|
| 2   | B     | 99/99 (100%) | 94 (95%)  | 5 (5%)   | 20 40       |

All (5) residues with a non-rotameric sidechain are listed below:

| Mol | Chain | Res | Type |
|-----|-------|-----|------|
| 2   | B     | 71  | LEU  |
| 2   | B     | 92  | MET  |
| 2   | B     | 97  | VAL  |
| 2   | B     | 105 | LEU  |
| 2   | B     | 111 | LEU  |

Sometimes sidechains can be flipped to improve hydrogen bonding and reduce clashes. All (2) such sidechains are listed below:

| Mol | Chain | Res | Type |
|-----|-------|-----|------|
| 2   | B     | 10  | ASN  |
| 2   | B     | 14  | GLN  |

### 5.3.3 RNA [i](#)

| Mol | Chain | Analysed      | Backbone Outliers | Pucker Outliers |
|-----|-------|---------------|-------------------|-----------------|
| 1   | A     | 416/417 (99%) | 168 (40%)         | 16 (3%)         |
| 3   | C     | 83/92 (90%)   | 35 (42%)          | 6 (7%)          |
| All | All   | 499/509 (98%) | 203 (40%)         | 22 (4%)         |

All (203) RNA backbone outliers are listed below:

| Mol | Chain | Res | Type |
|-----|-------|-----|------|
| 1   | A     | 2   | U    |
| 1   | A     | 9   | U    |
| 1   | A     | 11  | C    |
| 1   | A     | 15  | G    |
| 1   | A     | 28  | G    |
| 1   | A     | 30  | C    |
| 1   | A     | 32  | G    |
| 1   | A     | 33  | U    |
| 1   | A     | 35  | U    |

*Continued on next page...*

*Continued from previous page...*

| Mol | Chain | Res | Type |
|-----|-------|-----|------|
| 1   | A     | 36  | C    |
| 1   | A     | 47  | G    |
| 1   | A     | 48  | A    |
| 1   | A     | 49  | A    |
| 1   | A     | 50  | A    |
| 1   | A     | 51  | G    |
| 1   | A     | 52  | U    |
| 1   | A     | 55  | A    |
| 1   | A     | 67  | U    |
| 1   | A     | 68  | G    |
| 1   | A     | 70  | U    |
| 1   | A     | 74  | A    |
| 1   | A     | 75  | U    |
| 1   | A     | 76  | G    |
| 1   | A     | 85  | G    |
| 1   | A     | 86  | U    |
| 1   | A     | 88  | C    |
| 1   | A     | 89  | G    |
| 1   | A     | 90  | U    |
| 1   | A     | 91  | G    |
| 1   | A     | 99  | A    |
| 1   | A     | 101 | U    |
| 1   | A     | 102 | C    |
| 1   | A     | 106 | A    |
| 1   | A     | 108 | G    |
| 1   | A     | 109 | C    |
| 1   | A     | 117 | G    |
| 1   | A     | 118 | C    |
| 1   | A     | 122 | G    |
| 1   | A     | 123 | C    |
| 1   | A     | 126 | U    |
| 1   | A     | 127 | G    |
| 1   | A     | 128 | G    |
| 1   | A     | 130 | U    |
| 1   | A     | 131 | G    |
| 1   | A     | 132 | G    |
| 1   | A     | 134 | C    |
| 1   | A     | 137 | A    |
| 1   | A     | 138 | C    |
| 1   | A     | 139 | G    |
| 1   | A     | 149 | G    |
| 1   | A     | 150 | A    |

*Continued on next page...*

*Continued from previous page...*

| Mol | Chain | Res | Type |
|-----|-------|-----|------|
| 1   | A     | 151 | A    |
| 1   | A     | 152 | C    |
| 1   | A     | 155 | A    |
| 1   | A     | 156 | C    |
| 1   | A     | 157 | G    |
| 1   | A     | 158 | U    |
| 1   | A     | 159 | C    |
| 1   | A     | 160 | C    |
| 1   | A     | 161 | G    |
| 1   | A     | 162 | G    |
| 1   | A     | 163 | C    |
| 1   | A     | 164 | U    |
| 1   | A     | 165 | G    |
| 1   | A     | 169 | U    |
| 1   | A     | 171 | U    |
| 1   | A     | 172 | G    |
| 1   | A     | 173 | G    |
| 1   | A     | 175 | U    |
| 1   | A     | 177 | G    |
| 1   | A     | 179 | U    |
| 1   | A     | 180 | U    |
| 1   | A     | 181 | A    |
| 1   | A     | 182 | C    |
| 1   | A     | 183 | C    |
| 1   | A     | 185 | U    |
| 1   | A     | 187 | A    |
| 1   | A     | 190 | G    |
| 1   | A     | 191 | U    |
| 1   | A     | 192 | G    |
| 1   | A     | 197 | A    |
| 1   | A     | 199 | U    |
| 1   | A     | 202 | C    |
| 1   | A     | 204 | G    |
| 1   | A     | 216 | A    |
| 1   | A     | 219 | C    |
| 1   | A     | 225 | A    |
| 1   | A     | 226 | G    |
| 1   | A     | 227 | G    |
| 1   | A     | 230 | G    |
| 1   | A     | 232 | A    |
| 1   | A     | 233 | C    |
| 1   | A     | 234 | G    |

*Continued on next page...*

*Continued from previous page...*

| Mol | Chain | Res | Type |
|-----|-------|-----|------|
| 1   | A     | 235 | C    |
| 1   | A     | 238 | U    |
| 1   | A     | 239 | A    |
| 1   | A     | 240 | A    |
| 1   | A     | 241 | A    |
| 1   | A     | 242 | C    |
| 1   | A     | 250 | G    |
| 1   | A     | 254 | G    |
| 1   | A     | 255 | A    |
| 1   | A     | 256 | A    |
| 1   | A     | 257 | A    |
| 1   | A     | 266 | A    |
| 1   | A     | 267 | U    |
| 1   | A     | 270 | U    |
| 1   | A     | 272 | G    |
| 1   | A     | 274 | G    |
| 1   | A     | 276 | C    |
| 1   | A     | 278 | C    |
| 1   | A     | 290 | A    |
| 1   | A     | 291 | A    |
| 1   | A     | 292 | A    |
| 1   | A     | 295 | A    |
| 1   | A     | 300 | A    |
| 1   | A     | 304 | A    |
| 1   | A     | 312 | G    |
| 1   | A     | 313 | C    |
| 1   | A     | 314 | G    |
| 1   | A     | 317 | G    |
| 1   | A     | 318 | C    |
| 1   | A     | 321 | G    |
| 1   | A     | 322 | C    |
| 1   | A     | 323 | A    |
| 1   | A     | 324 | G    |
| 1   | A     | 328 | G    |
| 1   | A     | 329 | U    |
| 1   | A     | 330 | A    |
| 1   | A     | 333 | U    |
| 1   | A     | 334 | A    |
| 1   | A     | 343 | C    |
| 1   | A     | 347 | C    |
| 1   | A     | 349 | G    |
| 1   | A     | 350 | A    |

*Continued on next page...*

*Continued from previous page...*

| Mol | Chain | Res | Type |
|-----|-------|-----|------|
| 1   | A     | 351 | G    |
| 1   | A     | 353 | A    |
| 1   | A     | 358 | G    |
| 1   | A     | 359 | C    |
| 1   | A     | 361 | C    |
| 1   | A     | 362 | A    |
| 1   | A     | 363 | A    |
| 1   | A     | 364 | A    |
| 1   | A     | 365 | G    |
| 1   | A     | 366 | C    |
| 1   | A     | 367 | C    |
| 1   | A     | 368 | G    |
| 1   | A     | 369 | C    |
| 1   | A     | 372 | G    |
| 1   | A     | 373 | C    |
| 1   | A     | 375 | G    |
| 1   | A     | 376 | U    |
| 1   | A     | 379 | G    |
| 1   | A     | 380 | A    |
| 1   | A     | 381 | A    |
| 1   | A     | 382 | G    |
| 1   | A     | 383 | G    |
| 1   | A     | 384 | U    |
| 1   | A     | 389 | A    |
| 1   | A     | 391 | C    |
| 1   | A     | 392 | A    |
| 1   | A     | 401 | A    |
| 1   | A     | 402 | G    |
| 1   | A     | 404 | G    |
| 1   | A     | 405 | C    |
| 1   | A     | 407 | U    |
| 1   | A     | 408 | G    |
| 1   | A     | 410 | U    |
| 3   | C     | -5  | A    |
| 3   | C     | -4  | C    |
| 3   | C     | -3  | U    |
| 3   | C     | -2  | U    |
| 3   | C     | -1  | U    |
| 3   | C     | 8   | U    |
| 3   | C     | 9   | A    |
| 3   | C     | 10  | G    |
| 3   | C     | 11  | U    |

*Continued on next page...*

Continued from previous page...

| Mol | Chain | Res | Type |
|-----|-------|-----|------|
| 3   | C     | 12  | U    |
| 3   | C     | 13  | C    |
| 3   | C     | 15  | G    |
| 3   | C     | 17  | G    |
| 3   | C     | 18  | G    |
| 3   | C     | 19  | U    |
| 3   | C     | 20  | A    |
| 3   | C     | 21  | G    |
| 3   | C     | 23  | A    |
| 3   | C     | 26  | C    |
| 3   | C     | 29  | C    |
| 3   | C     | 33  | G    |
| 3   | C     | 37  | A    |
| 3   | C     | 40  | U    |
| 3   | C     | 44  | G    |
| 3   | C     | 45  | G    |
| 3   | C     | 46  | U    |
| 3   | C     | 47  | C    |
| 3   | C     | 48  | G    |
| 3   | C     | 52  | G    |
| 3   | C     | 58  | G    |
| 3   | C     | 59  | U    |
| 3   | C     | 60  | C    |
| 3   | C     | 63  | G    |
| 3   | C     | 72  | U    |
| 3   | C     | 75  | A    |

All (22) RNA pucker outliers are listed below:

| Mol | Chain | Res | Type |
|-----|-------|-----|------|
| 1   | A     | 50  | A    |
| 1   | A     | 67  | U    |
| 1   | A     | 75  | U    |
| 1   | A     | 101 | U    |
| 1   | A     | 122 | G    |
| 1   | A     | 126 | U    |
| 1   | A     | 137 | A    |
| 1   | A     | 176 | C    |
| 1   | A     | 182 | C    |
| 1   | A     | 201 | A    |
| 1   | A     | 232 | A    |
| 1   | A     | 233 | C    |

Continued on next page...

Continued from previous page...

| Mol | Chain | Res | Type |
|-----|-------|-----|------|
| 1   | A     | 240 | A    |
| 1   | A     | 349 | G    |
| 1   | A     | 363 | A    |
| 1   | A     | 365 | G    |
| 3   | C     | -7  | U    |
| 3   | C     | -4  | C    |
| 3   | C     | 7   | G    |
| 3   | C     | 18  | G    |
| 3   | C     | 46  | U    |
| 3   | C     | 59  | U    |

#### 5.4 Non-standard residues in protein, DNA, RNA chains [i](#)

There are no non-standard protein/DNA/RNA residues in this entry.

#### 5.5 Carbohydrates [i](#)

There are no oligosaccharides in this entry.

#### 5.6 Ligand geometry [i](#)

Of 29 ligands modelled in this entry, 29 are monoatomic - leaving 0 for Mogul analysis.

There are no bond length outliers.

There are no bond angle outliers.

There are no chirality outliers.

There are no torsion outliers.

There are no ring outliers.

No monomer is involved in short contacts.

#### 5.7 Other polymers [i](#)

There are no such residues in this entry.

#### 5.8 Polymer linkage issues [i](#)

There are no chain breaks in this entry.

## 6 Map visualisation [i](#)

This section contains visualisations of the EMDB entry EMD-70946. These allow visual inspection of the internal detail of the map and identification of artifacts.

Images derived from a raw map, generated by summing the deposited half-maps, are presented below the corresponding image components of the primary map to allow further visual inspection and comparison with those of the primary map.

### 6.1 Orthogonal projections [i](#)

#### 6.1.1 Primary map

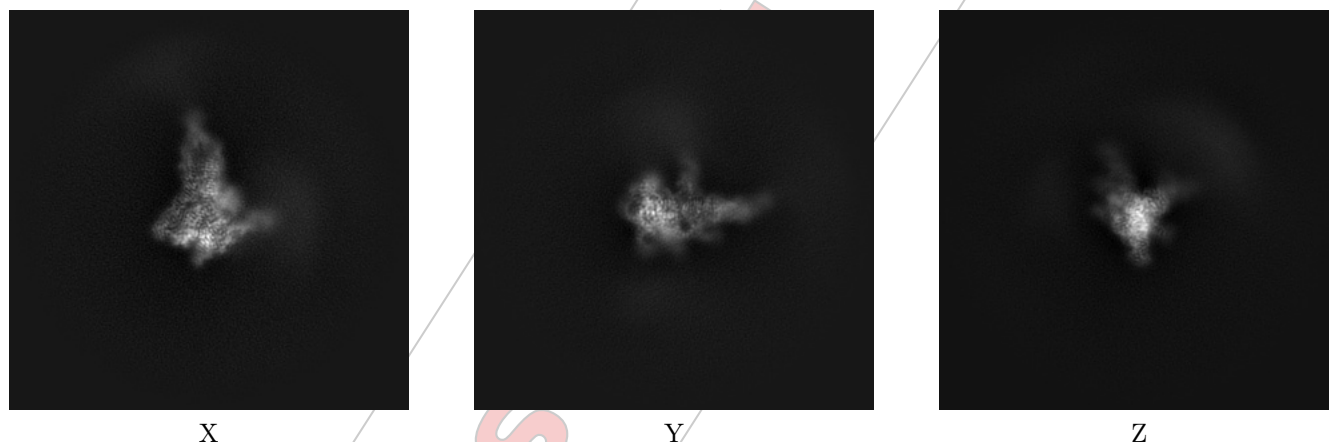

#### 6.1.2 Raw map

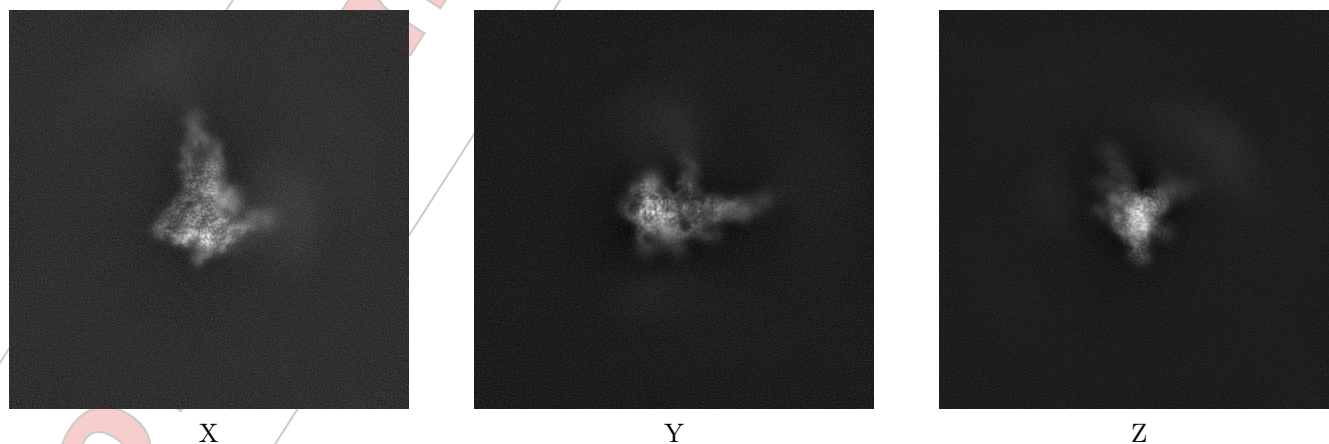

The images above show the map projected in three orthogonal directions.

## 6.2 Central slices [i](#)

### 6.2.1 Primary map

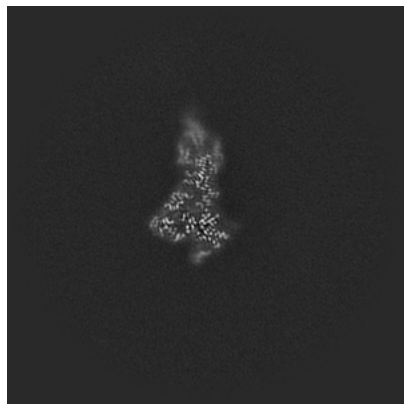

X Index: 200

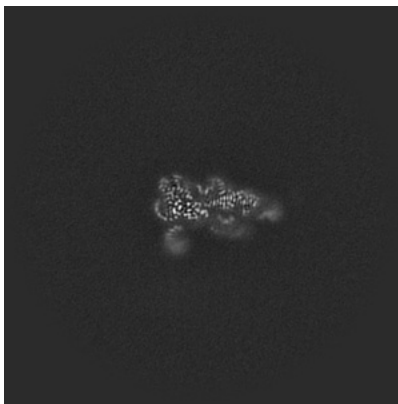

Y Index: 200

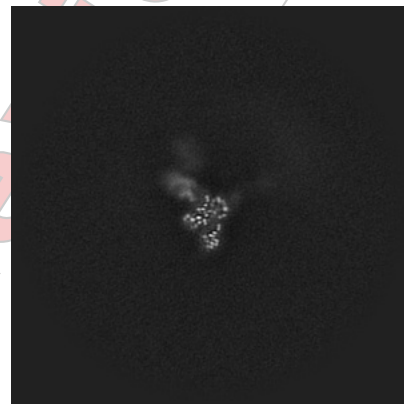

Z Index: 200

### 6.2.2 Raw map

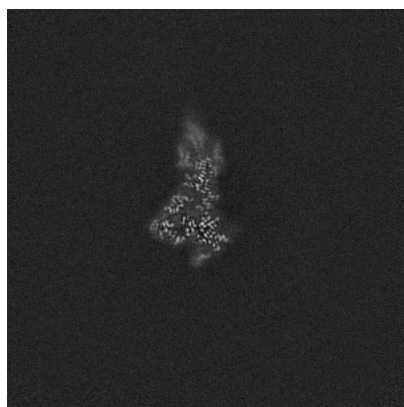

X Index: 200

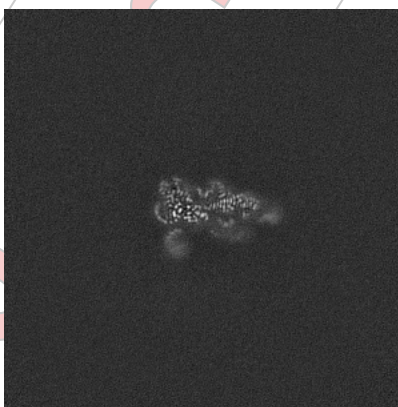

Y Index: 200

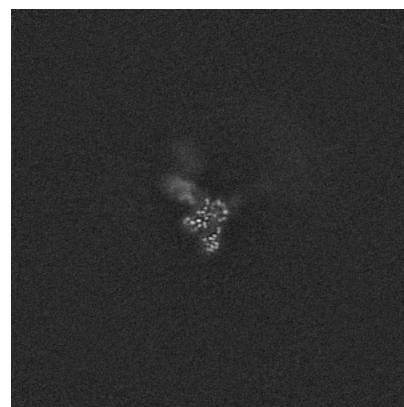

Z Index: 200

The images above show central slices of the map in three orthogonal directions.

## 6.3 Largest variance slices [i](#)

### 6.3.1 Primary map

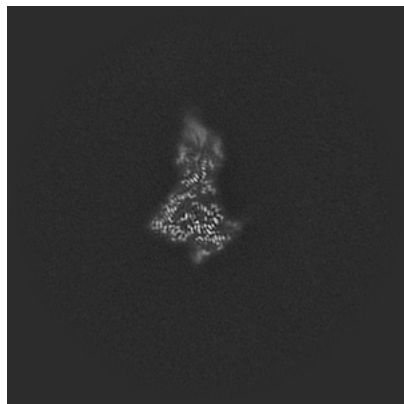

X Index: 197

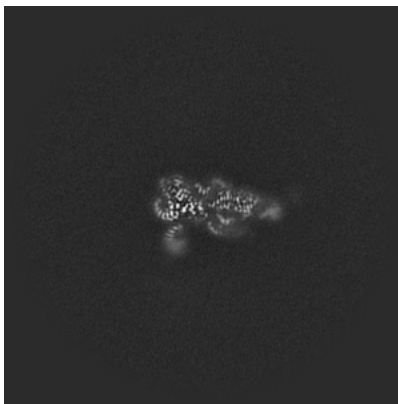

Y Index: 198

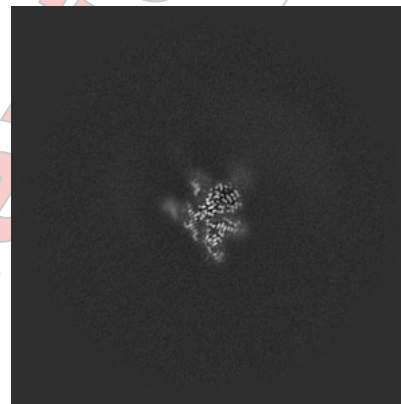

Z Index: 173

### 6.3.2 Raw map

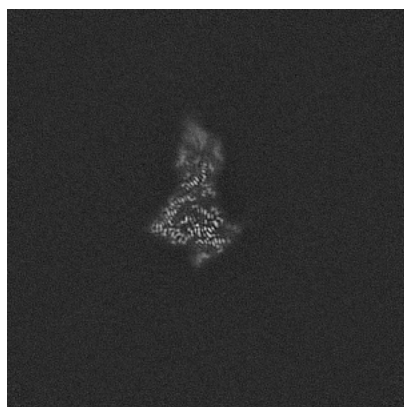

X Index: 197

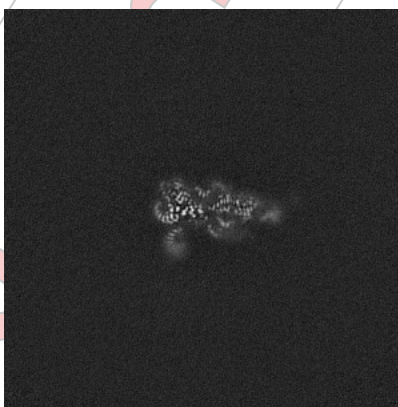

Y Index: 198

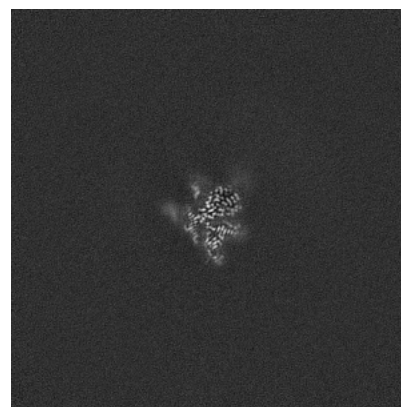

Z Index: 173

The images above show the largest variance slices of the map in three orthogonal directions.

## 6.4 Orthogonal standard-deviation projections (False-color) [i](#)

### 6.4.1 Primary map

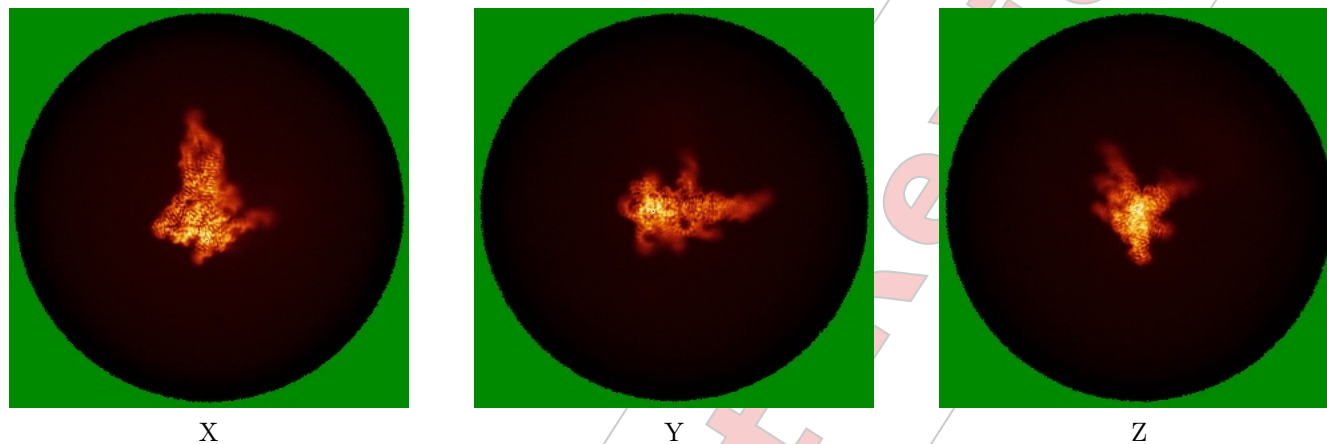

### 6.4.2 Raw map

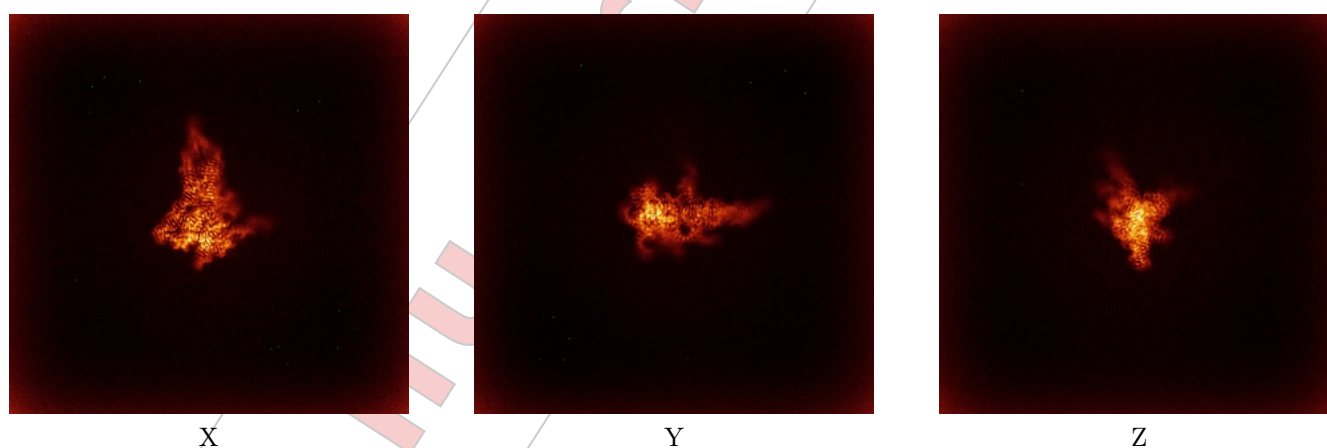

The images above show the map standard deviation projections with false color in three orthogonal directions. Minimum values are shown in green, max in blue, and dark to light orange shades represent small to large values respectively.

## 6.5 Orthogonal surface views [i](#)

### 6.5.1 Primary map

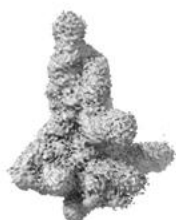

X

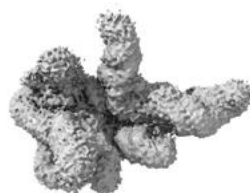

Y

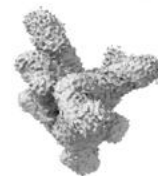

Z

The images above show the 3D surface view of the map at the recommended contour level 0.03. These images, in conjunction with the slice images, may facilitate assessment of whether an appropriate contour level has been provided.

### 6.5.2 Raw map

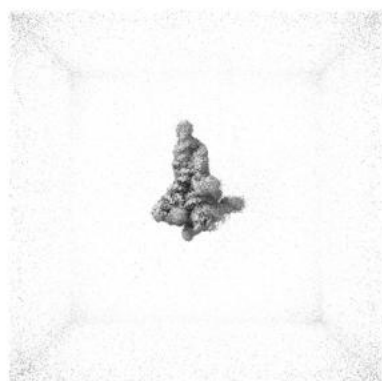

X

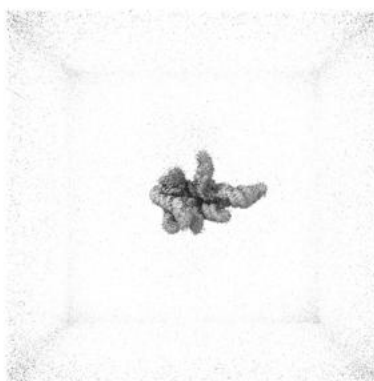

Y

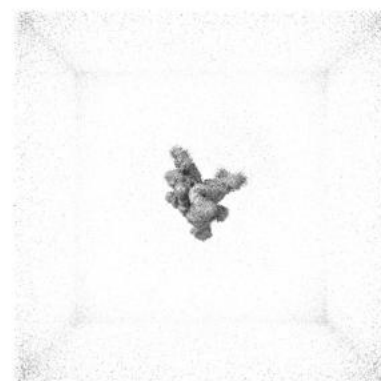

Z

These images show the 3D surface of the raw map. The raw map's contour level was selected so that its surface encloses the same volume as the primary map does at its recommended contour level.

## 6.6 Mask visualisation [i](#)

This section was not generated. No masks/segmentation were deposited.

## 7 Map analysis [i](#)

This section contains the results of statistical analysis of the map.

### 7.1 Map-value distribution [i](#)

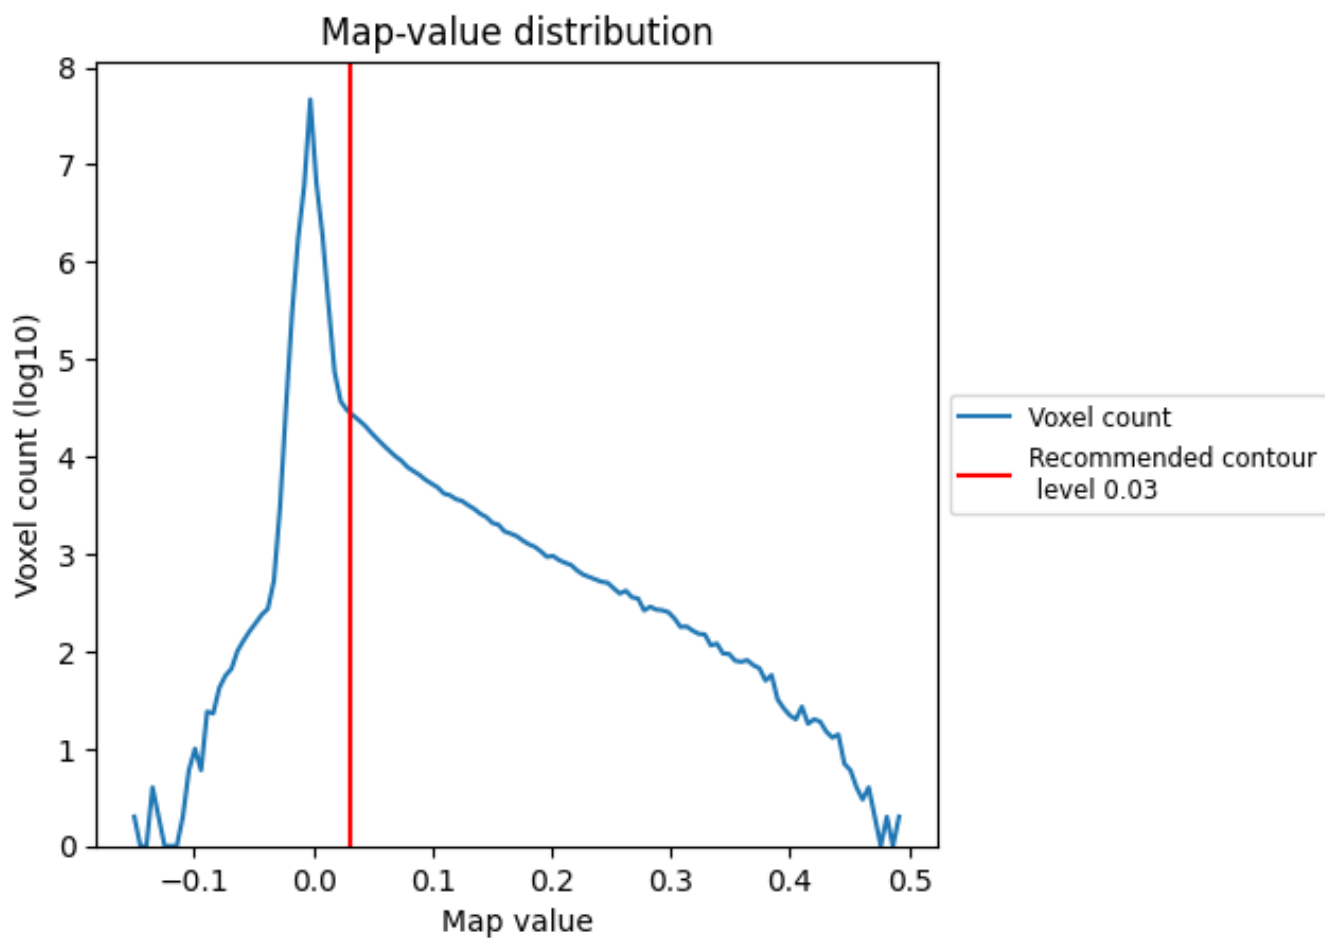

The map-value distribution is plotted in 128 intervals along the x-axis. The y-axis is logarithmic. A spike in this graph at zero usually indicates that the volume has been masked.

## 7.2 Volume estimate [i](#)

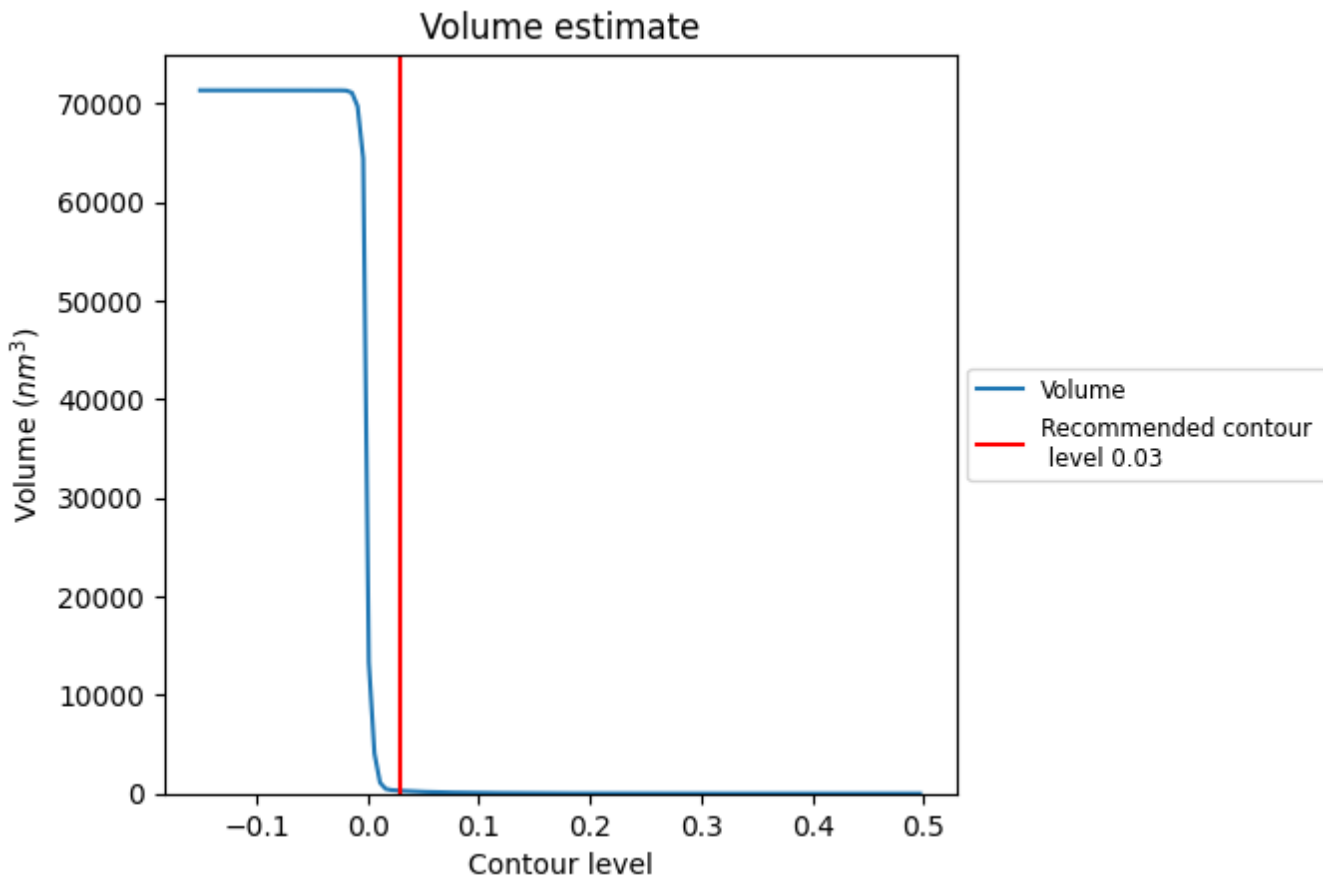

The volume at the recommended contour level is 286  $\text{nm}^3$ ; this corresponds to an approximate mass of 259 kDa.

The volume estimate graph shows how the enclosed volume varies with the contour level. The recommended contour level is shown as a vertical line and the intersection between the line and the curve gives the volume of the enclosed surface at the given level.

7.3 Rotationally averaged power spectrum 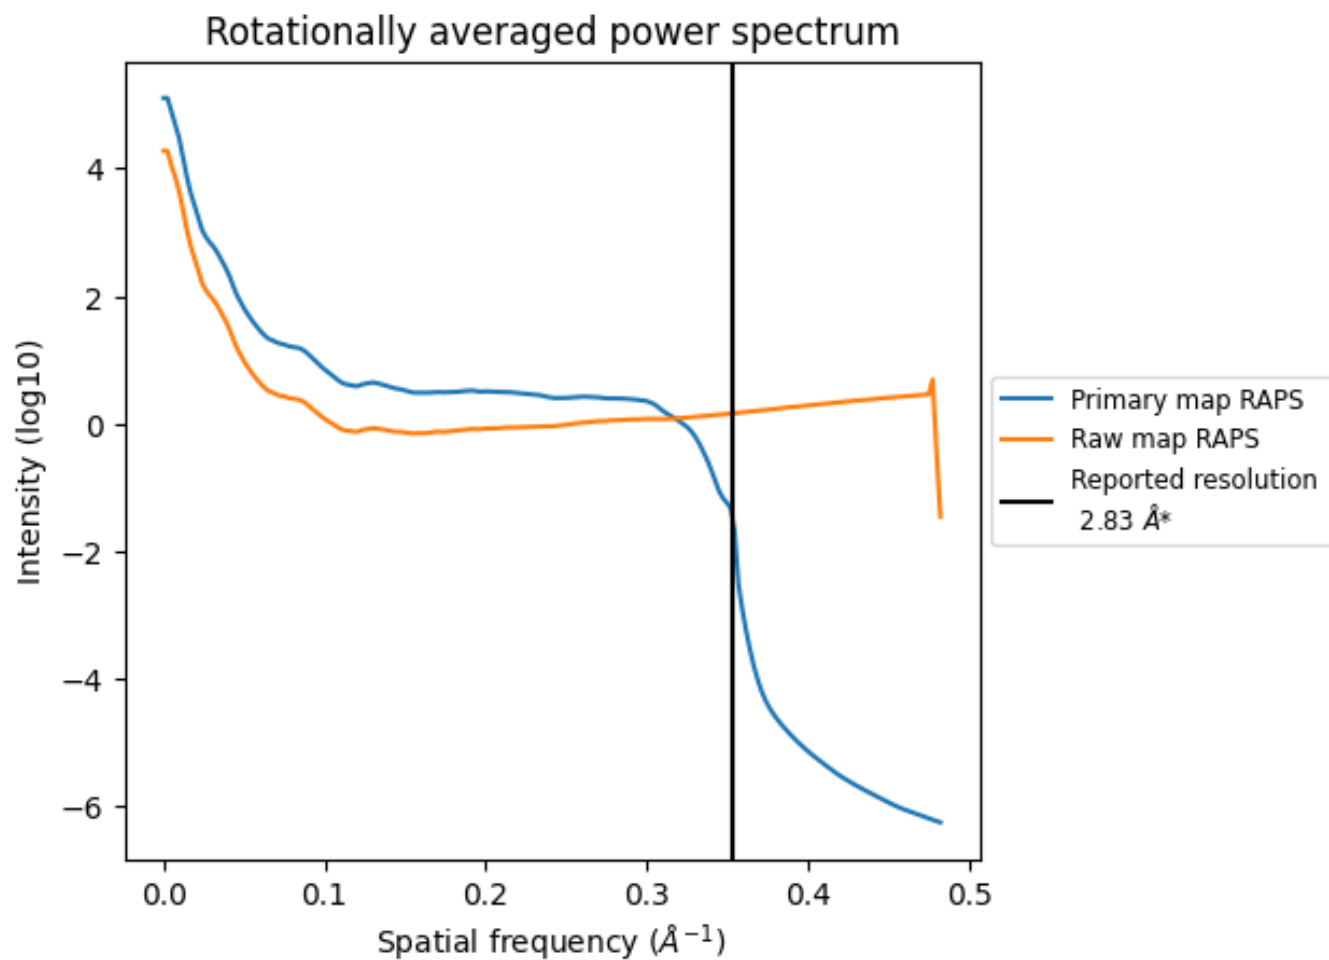

\*Reported resolution corresponds to spatial frequency of 0.353 Å<sup>-1</sup>

## 8 Fourier-Shell correlation [i](#)

Fourier-Shell Correlation (FSC) is the most commonly used method to estimate the resolution of single-particle and subtomogram-averaged maps. The shape of the curve depends on the imposed symmetry, mask and whether or not the two 3D reconstructions used were processed from a common reference. The reported resolution is shown as a black line. A curve is displayed for the half-bit criterion in addition to lines showing the 0.143 gold standard cut-off and 0.5 cut-off.

### 8.1 FSC [i](#)

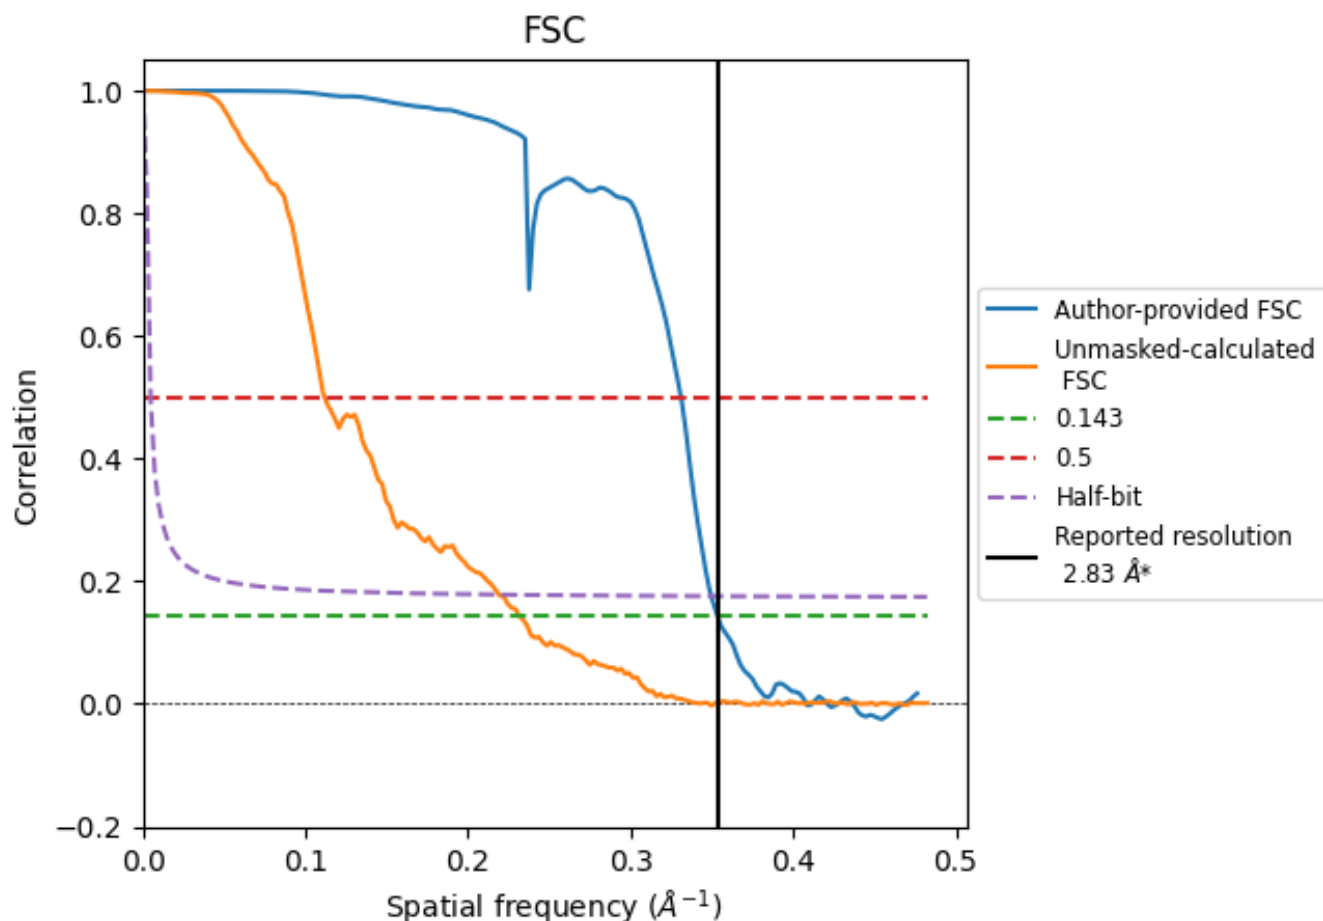

\*Reported resolution corresponds to spatial frequency of 0.353 Å<sup>-1</sup>

## 8.2 Resolution estimates [i](#)

| Resolution estimate (Å)   | Estimation criterion (FSC cut-off) |      |          |
|---------------------------|------------------------------------|------|----------|
|                           | 0.143                              | 0.5  | Half-bit |
| Reported by author        | 2.83                               | -    | -        |
| Author-provided FSC curve | 2.83                               | 3.02 | 2.86     |
| Unmasked-calculated*      | 4.32                               | 8.95 | 4.57     |

\*Resolution estimate based on FSC curve calculated by comparison of deposited half-maps. The value from deposited half-maps intersecting FSC 0.143 CUT-OFF 4.32 differs from the reported value 2.83 by more than 10 %

## 9 Map-model fit [i](#)

This section contains information regarding the fit between EMDB map EMD-70946 and PDB model 9OWW. Per-residue inclusion information can be found in section 3 on page 4.

### 9.1 Map-model overlay [i](#)

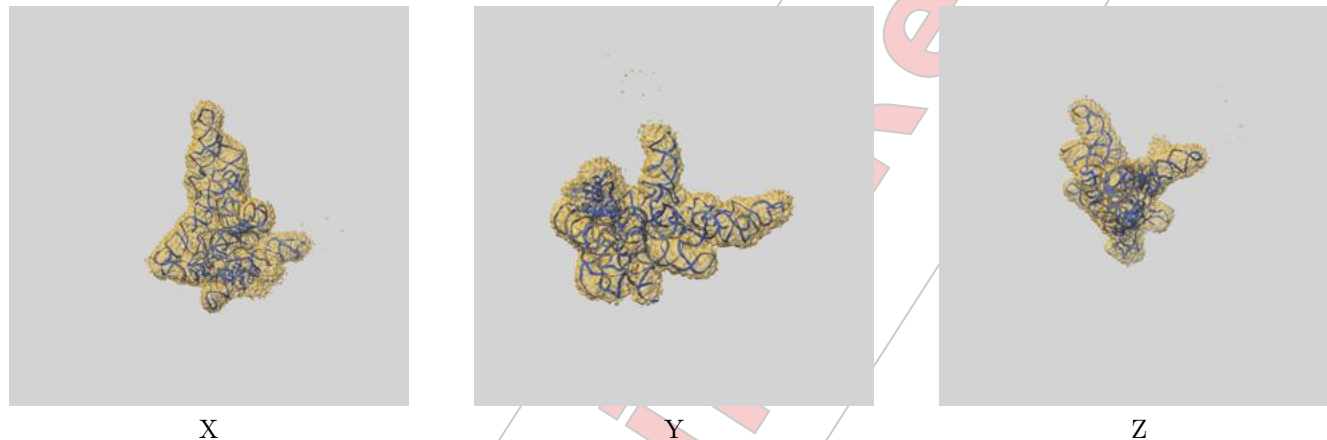

The images above show the 3D surface view of the map at the recommended contour level 0.03 at 50% transparency in yellow overlaid with a ribbon representation of the model coloured in blue. These images allow for the visual assessment of the quality of fit between the atomic model and the map.

## 9.2 Q-score mapped to coordinate model [\(i\)](#)

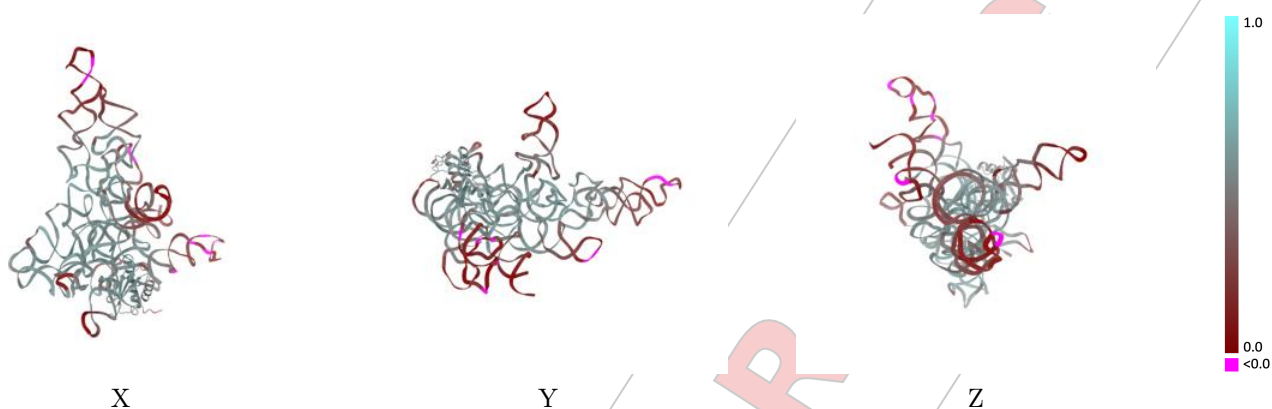

The images above show the model with each residue coloured according to its Q-score. This shows their resolvability in the map with higher Q-score values reflecting better resolvability. Please note: Q-score is calculating the resolvability of atoms, and thus high values are only expected at resolutions at which atoms can be resolved. Low Q-score values may therefore be expected for many entries.

## 9.3 Atom inclusion mapped to coordinate model [\(i\)](#)

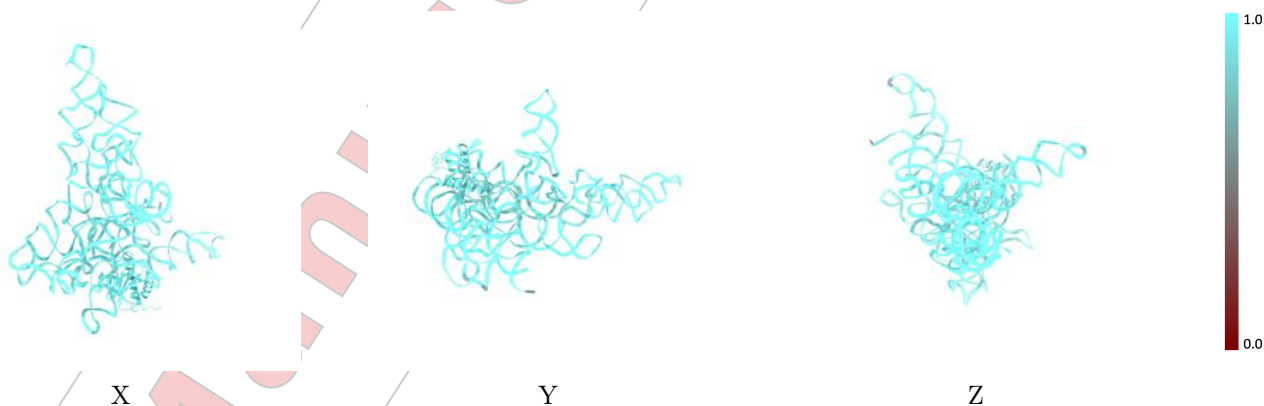

The images above show the model with each residue coloured according to its atom inclusion. This shows to what extent they are inside the map at the recommended contour level (0.03).

## 9.4 Atom inclusion i

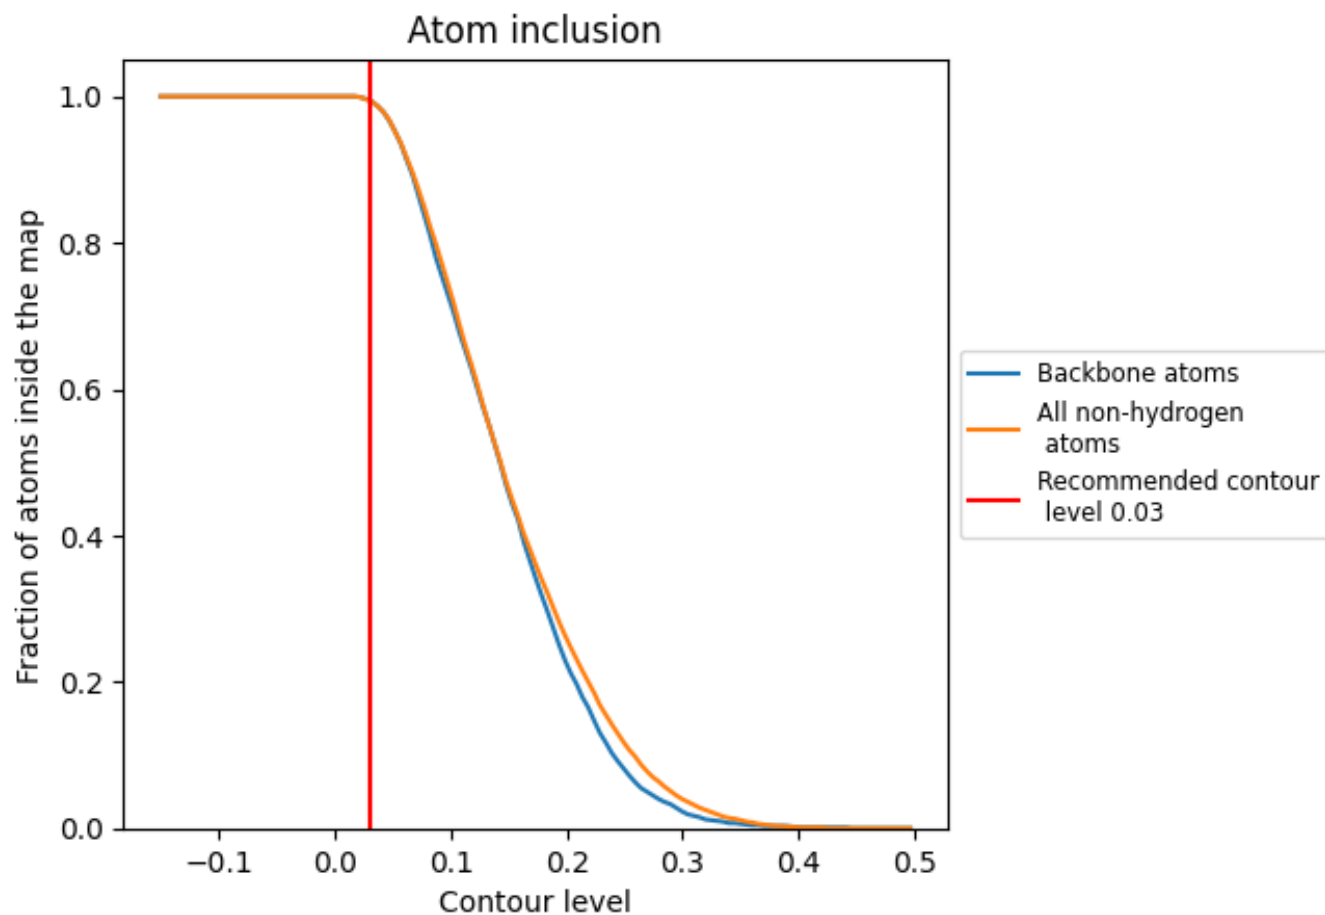

At the recommended contour level, 100% of all backbone atoms, 99% of all non-hydrogen atoms, are inside the map.

## 9.5 Map-model fit summary

The table lists the average atom inclusion at the recommended contour level (0.03) and Q-score for the entire model and for each chain.

| Chain | Atom inclusion                                                                           | Q-score                                                                                  |
|-------|------------------------------------------------------------------------------------------|------------------------------------------------------------------------------------------|
| All   |  0.9940 |  0.4370 |
| A     |  0.9950 |  0.4290 |
| B     |  0.9890 |  0.5200 |
| C     |  0.9950 |  0.4310 |





## Full wwPDB EM Validation Report ⓘ

Jun 4, 2025 – 04:41 PM EDT

PDB ID : 9OWX / pdb\_00009owx  
EMDB ID : EMD-70947  
Title : Structure of Geobacillus stearothermophilus RNase P holoenzyme in complex with the precursor tRNA with loop-back 5' leader (sub-conformation 1 of tRNA anticodon arm tilted)  
Deposited on : 2025-06-02  
Resolution : 2.70 Å (reported)  
Based on initial model : 2A64

**This wwPDB validation report is for manuscript review**

This is a Full wwPDB EM Validation Report.

This report is produced by the wwPDB biocuration pipeline after annotation of the structure.

We welcome your comments at [validation@mail.wwpdb.org](mailto:validation@mail.wwpdb.org)

A user guide is available at

<https://www.wwpdb.org/validation/2017/EMValidationReportHelp>

with specific help available everywhere you see the ⓘ symbol.

The types of validation reports are described at

<http://www.wwpdb.org/validation/2017/FAQs#types>.

---

The following versions of software and data (see [references ⓘ](#)) were used in the production of this report:

EMDB validation analysis : 0.0.1.dev118  
MolProbity : 4-5-2 with Phenix2.0rc1  
Percentile statistics : 20231227.v01 (using entries in the PDB archive December 27th 2023)  
MapQ : 1.9.13  
Ideal geometry (proteins) : Engh & Huber (2001)

# 1 Overall quality at a glance i

The following experimental techniques were used to determine the structure:  
*ELECTRON MICROSCOPY*

The reported resolution of this entry is 2.70 Å.

Percentile scores (ranging between 0-100) for global validation metrics of the entry are shown in the following graphic. The table shows the number of entries on which the scores are based.

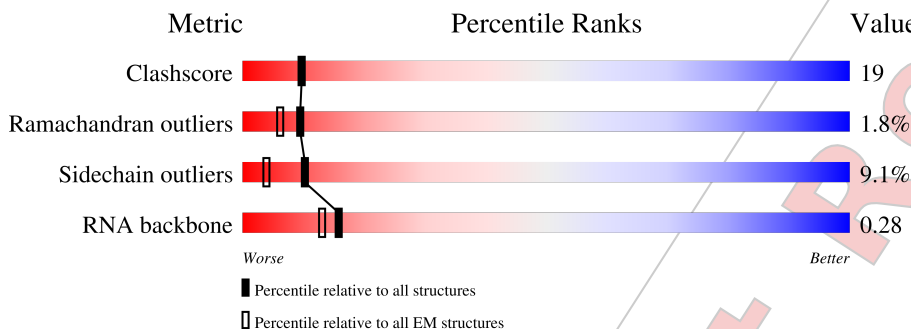

| Metric                | Whole archive (#Entries) | EM structures (#Entries) |
|-----------------------|--------------------------|--------------------------|
| Clashscore            | 210492                   | 15764                    |
| Ramachandran outliers | 207382                   | 16835                    |
| Sidechain outliers    | 206894                   | 16415                    |
| RNA backbone          | 6643                     | 2191                     |

The table below summarises the geometric issues observed across the polymeric chains and their fit to the map. The red, orange, yellow and green segments of the bar indicate the fraction of residues that contain outliers for  $\geq 3$ , 2, 1 and 0 types of geometric quality criteria respectively. A grey segment represents the fraction of residues that are not modelled. The numeric value for each fraction is indicated below the corresponding segment, with a dot representing fractions  $\leq 5\%$ . The upper red bar (where present) indicates the fraction of residues that have poor fit to the EM map (all-atom inclusion  $< 40\%$ ). The numeric value is given above the bar.

| Mol | Chain | Length | Quality of chain |
|-----|-------|--------|------------------|
| 1   | A     | 417    | 30% 45% 23% .    |
| 2   | B     | 116    | 71% 23% . .      |
| 3   | C     | 111    | 26% 44% 26% . .  |

Ideal geometry (DNA, RNA) : Parkinson et al. (1996)  
Validation Pipeline (wwPDB-VP) : 2.43.1

## 2 Entry composition i

There are 4 unique types of molecules in this entry. The entry contains 12229 atoms, of which 0 are hydrogens and 0 are deuteriums.

In the tables below, the AltConf column contains the number of residues with at least one atom in alternate conformation and the Trace column contains the number of residues modelled with at most 2 atoms.

- Molecule 1 is a RNA chain called RNase P RNA (417-MER).

| Mol | Chain | Residues | Atoms |      |      |      |     | AltConf | Trace |
|-----|-------|----------|-------|------|------|------|-----|---------|-------|
|     |       |          | Total | C    | N    | O    | P   |         |       |
| 1   | A     | 417      | 8962  | 3996 | 1660 | 2889 | 417 | 0       | 0     |

- Molecule 2 is a protein called Ribonuclease P protein component.

| Mol | Chain | Residues | Atoms |     |     |     |   | AltConf | Trace |
|-----|-------|----------|-------|-----|-----|-----|---|---------|-------|
|     |       |          | Total | C   | N   | O   | S |         |       |
| 2   | B     | 116      | 947   | 608 | 174 | 162 | 3 | 0       | 0     |

There are 2 discrepancies between the modelled and reference sequences:

| Chain | Residue | Modelled | Actual | Comment        | Reference      |
|-------|---------|----------|--------|----------------|----------------|
| B     | 0       | GLY      | -      | expression tag | UNP A0A150N245 |
| B     | 64      | ILE      | VAL    | conflict       | UNP A0A150N245 |

- Molecule 3 is a RNA chain called precursor RNA (108-MER).

| Mol | Chain | Residues | Atoms |      |     |     |     | AltConf | Trace |
|-----|-------|----------|-------|------|-----|-----|-----|---------|-------|
|     |       |          | Total | C    | N   | O   | P   |         |       |
| 3   | C     | 108      | 2293  | 1022 | 397 | 766 | 108 | 0       | 0     |

- Molecule 4 is CALCIUM ION (CCD ID: CA) (formula: Ca) (labeled as "Ligand of Interest" by depositor).

| Mol | Chain | Residues | Atoms |    | AltConf |
|-----|-------|----------|-------|----|---------|
| 4   | A     | 26       | Total | Ca | 0       |
|     |       |          | 26    | 26 |         |
| 4   | C     | 1        | Total | Ca | 0       |
|     |       |          | 1     | 1  |         |

### 3 Residue-property plots

These plots are drawn for all protein, RNA, DNA and oligosaccharide chains in the entry. The first graphic for a chain summarises the proportions of the various outlier classes displayed in the second graphic. The second graphic shows the sequence view annotated by issues in geometry and atom inclusion in map density. Residues are color-coded according to the number of geometric quality criteria for which they contain at least one outlier: green = 0, yellow = 1, orange = 2 and red = 3 or more. A red diamond above a residue indicates a poor fit to the EM map for this residue (all-atom inclusion < 40%). Stretches of 2 or more consecutive residues without any outlier are shown as a green connector. Residues present in the sample, but not in the model, are shown in grey.

- Molecule 1: RNase P RNA (417-MER)

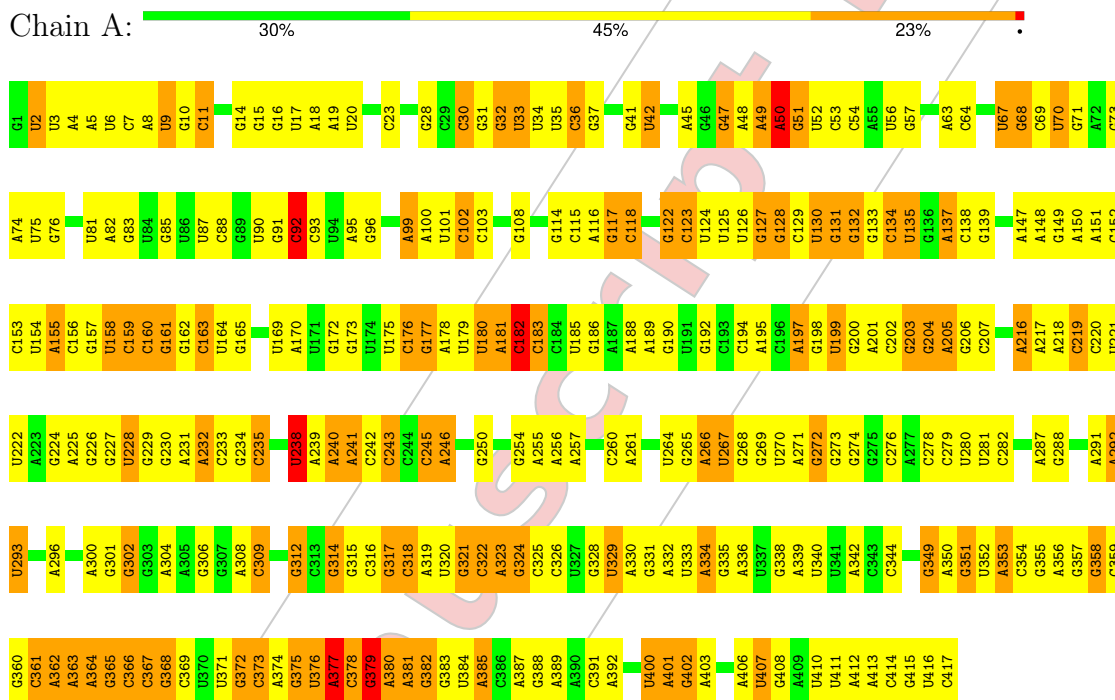

- Molecule 2: Ribonuclease P protein component

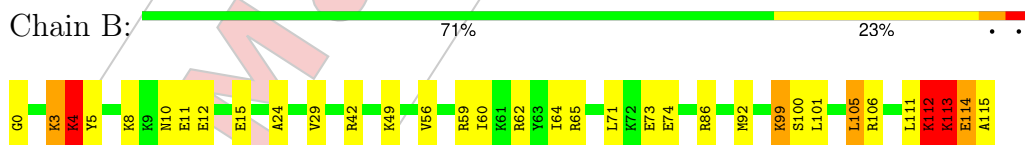

- Molecule 3: precursor RNA (108-MER)

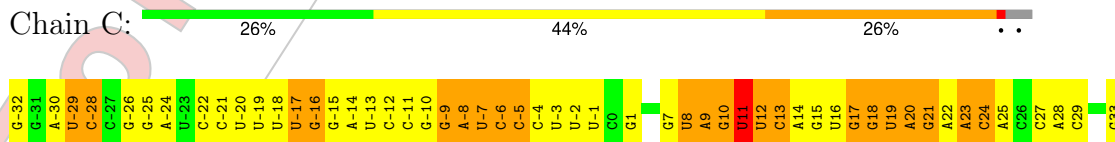

|     |     |     |     |     |     |     |     |     |     |     |     |     |     |     |     |     |     |     |     |     |     |     |     |     |     |     |     |     |     |     |   |   |   |
|-----|-----|-----|-----|-----|-----|-----|-----|-----|-----|-----|-----|-----|-----|-----|-----|-----|-----|-----|-----|-----|-----|-----|-----|-----|-----|-----|-----|-----|-----|-----|---|---|---|
| C34 | C35 | A36 | A37 | G38 | G39 | G43 | G44 | G45 | U46 | C47 | G48 | G52 | U53 | U54 | C55 | G56 | A57 | G58 | U59 | C60 | C61 | U67 | C68 | C69 | G70 | C71 | U72 | C73 | C74 | A75 | A | U | A |
|-----|-----|-----|-----|-----|-----|-----|-----|-----|-----|-----|-----|-----|-----|-----|-----|-----|-----|-----|-----|-----|-----|-----|-----|-----|-----|-----|-----|-----|-----|-----|---|---|---|

For Manuscript Review

## 4 Experimental information i

| Property                             | Value                                   | Source    |
|--------------------------------------|-----------------------------------------|-----------|
| EM reconstruction method             | SINGLE PARTICLE                         | Depositor |
| Imposed symmetry                     | POINT, Not provided                     |           |
| Number of particles used             | 508154                                  | Depositor |
| Resolution determination method      | FSC 0.143 CUT-OFF                       | Depositor |
| CTF correction method                | PHASE FLIPPING AND AMPLITUDE CORRECTION | Depositor |
| Microscope                           | FEI TALOS ARCTICA                       | Depositor |
| Voltage (kV)                         | 200                                     | Depositor |
| Electron dose ( $e^-/\text{\AA}^2$ ) | 57                                      | Depositor |
| Minimum defocus (nm)                 | 500                                     | Depositor |
| Maximum defocus (nm)                 | 1500                                    | Depositor |
| Magnification                        | Not provided                            |           |
| Image detector                       | GATAN K3 BIOQUANTUM (6k x 4k)           | Depositor |
| Maximum map value                    | 0.537                                   | Depositor |
| Minimum map value                    | -0.159                                  | Depositor |
| Average map value                    | -0.000                                  | Depositor |
| Map value standard deviation         | 0.007                                   | Depositor |
| Recommended contour level            | 0.02                                    | Depositor |
| Map size (Å)                         | 414.72, 414.72, 414.72                  | wwPDB     |
| Map dimensions                       | 400, 400, 400                           | wwPDB     |
| Map angles (°)                       | 90.0, 90.0, 90.0                        | wwPDB     |
| Pixel spacing (Å)                    | 1.0368, 1.0368, 1.0368                  | Depositor |

## 5 Model quality (i)

### 5.1 Standard geometry (i)

Bond lengths and bond angles in the following residue types are not validated in this section: CA

The Z score for a bond length (or angle) is the number of standard deviations the observed value is removed from the expected value. A bond length (or angle) with  $|Z| > 5$  is considered an outlier worth inspection. RMSZ is the root-mean-square of all Z scores of the bond lengths (or angles).

| Mol | Chain | Bond lengths |                | Bond angles |                 |
|-----|-------|--------------|----------------|-------------|-----------------|
|     |       | RMSZ         | # Z  >5        | RMSZ        | # Z  >5         |
| 1   | A     | 0.55         | 0/10038        | 0.90        | 10/15661 (0.1%) |
| 2   | B     | 0.57         | 1/962 (0.1%)   | 0.73        | 1/1281 (0.1%)   |
| 3   | C     | 0.73         | 1/2558 (0.0%)  | 0.91        | 5/3984 (0.1%)   |
| All | All   | 0.59         | 2/13558 (0.0%) | 0.89        | 16/20926 (0.1%) |

Chiral center outliers are detected by calculating the chiral volume of a chiral center and verifying if the center is modelled as a planar moiety or with the opposite hand. A planarity outlier is detected by checking planarity of atoms in a peptide group, atoms in a mainchain group or atoms of a sidechain that are expected to be planar.

| Mol | Chain | #Chirality outliers | #Planarity outliers |
|-----|-------|---------------------|---------------------|
| 2   | B     | 0                   | 1                   |

All (2) bond length outliers are listed below:

| Mol | Chain | Res | Type | Atoms | Z     | Observed(Å) | Ideal(Å) |
|-----|-------|-----|------|-------|-------|-------------|----------|
| 3   | C     | 11  | U    | O3'-P | 24.79 | 1.98        | 1.61     |
| 2   | B     | 100 | SER  | CA-CB | -6.89 | 1.42        | 1.53     |

All (16) bond angle outliers are listed below:

| Mol | Chain | Res | Type | Atoms       | Z     | Observed(°) | Ideal(°) |
|-----|-------|-----|------|-------------|-------|-------------|----------|
| 3   | C     | 11  | U    | O3'-P-O5'   | 10.03 | 119.05      | 104.00   |
| 1   | A     | 377 | A    | C4'-C3'-C2' | -6.51 | 96.09       | 102.60   |
| 3   | C     | 46  | U    | C2'-C3'-O3' | 6.20  | 118.79      | 109.50   |
| 3   | C     | -5  | C    | O3'-P-O5'   | -6.16 | 94.76       | 104.00   |
| 1   | A     | 182 | C    | C4'-C3'-C2' | -5.91 | 96.69       | 102.60   |
| 1   | A     | 379 | G    | O3'-P-O5'   | -5.86 | 95.22       | 104.00   |
| 1   | A     | 92  | C    | O3'-P-O5'   | -5.82 | 95.27       | 104.00   |
| 3   | C     | 69  | C    | C4'-C3'-C2' | -5.70 | 96.90       | 102.60   |

Continued on next page...

Continued from previous page...

| Mol | Chain | Res | Type | Atoms       | Z     | Observed(°) | Ideal(°) |
|-----|-------|-----|------|-------------|-------|-------------|----------|
| 1   | A     | 81  | U    | O3'-P-O5'   | -5.62 | 95.57       | 104.00   |
| 3   | C     | 69  | C    | O3'-P-O5'   | -5.61 | 95.59       | 104.00   |
| 1   | A     | 176 | C    | C2'-C3'-O3' | 5.54  | 122.01      | 113.70   |
| 1   | A     | 50  | A    | O3'-P-O5'   | -5.26 | 96.10       | 104.00   |
| 1   | A     | 238 | U    | O3'-P-O5'   | -5.26 | 96.11       | 104.00   |
| 1   | A     | 50  | A    | C4'-C3'-O3' | -5.17 | 105.24      | 113.00   |
| 1   | A     | 240 | A    | C4'-C3'-C2' | -5.09 | 97.51       | 102.60   |
| 2   | B     | 4   | LYS  | N-CA-C      | -5.07 | 105.94      | 111.82   |

There are no chirality outliers.

All (1) planarity outliers are listed below:

| Mol | Chain | Res | Type | Group     |
|-----|-------|-----|------|-----------|
| 2   | B     | 59  | ARG  | Sidechain |

## 5.2 Too-close contacts [i](#)

In the following table, the Non-H and H(model) columns list the number of non-hydrogen atoms and hydrogen atoms in the chain respectively. The H(added) column lists the number of hydrogen atoms added and optimized by MolProbity. The Clashes column lists the number of clashes within the asymmetric unit, whereas Symm-Clashes lists symmetry-related clashes.

| Mol | Chain | Non-H | H(model) | H(added) | Clashes | Symm-Clashes |
|-----|-------|-------|----------|----------|---------|--------------|
| 1   | A     | 8962  | 0        | 4510     | 275     | 0            |
| 2   | B     | 947   | 0        | 1008     | 32      | 0            |
| 3   | C     | 2293  | 0        | 1162     | 51      | 0            |
| 4   | A     | 26    | 0        | 0        | 1       | 0            |
| 4   | C     | 1     | 0        | 0        | 0       | 0            |
| All | All   | 12229 | 0        | 6680     | 344     | 0            |

The all-atom clashscore is defined as the number of clashes found per 1000 atoms (including hydrogen atoms). The all-atom clashscore for this structure is 19.

All (344) close contacts within the same asymmetric unit are listed below, sorted by their clash magnitude.

| Atom-1        | Atom-2       | Interatomic distance (Å) | Clash overlap (Å) |
|---------------|--------------|--------------------------|-------------------|
| 1:A:158:U:H3' | 1:A:159:C:C6 | 1.40                     | 1.55              |
| 1:A:158:U:C3' | 1:A:159:C:C6 | 2.17                     | 1.28              |
| 3:C:11:U:O3'  | 3:C:12:U:P   | 1.98                     | 1.20              |

Continued on next page...

Continued from previous page...

| Atom-1           | Atom-2         | Interatomic distance (Å) | Clash overlap (Å) |
|------------------|----------------|--------------------------|-------------------|
| 1:A:158:U:O3'    | 1:A:159:C:O4'  | 1.57                     | 1.19              |
| 2:B:86:ARG:HH12  | 3:C:-32:G:H1'  | 1.21                     | 1.05              |
| 1:A:364:A:C4     | 1:A:365:G:H1'  | 1.96                     | 0.99              |
| 2:B:105:LEU:HB3  | 2:B:111:LEU:HG | 1.51                     | 0.92              |
| 1:A:378:C:H3'    | 1:A:379:G:H8   | 1.35                     | 0.92              |
| 1:A:158:U:C3'    | 1:A:159:C:H6   | 1.63                     | 0.92              |
| 1:A:371:U:H5''   | 1:A:372:G:H5'  | 1.54                     | 0.90              |
| 1:A:350:A:H1'    | 1:A:380:A:C2   | 2.10                     | 0.85              |
| 1:A:363:A:H2'    | 1:A:364:A:C4   | 2.12                     | 0.83              |
| 1:A:158:U:H2'    | 1:A:159:C:C1'  | 2.09                     | 0.82              |
| 2:B:106:ARG:HH11 | 2:B:113:LYS:HA | 1.44                     | 0.82              |
| 1:A:158:U:H2'    | 1:A:159:C:H1'  | 1.62                     | 0.82              |
| 1:A:378:C:H3'    | 1:A:379:G:C8   | 2.14                     | 0.82              |
| 1:A:367:C:H2'    | 1:A:368:G:C8   | 2.15                     | 0.81              |
| 1:A:314:G:H1     | 1:A:323:A:H61  | 1.30                     | 0.80              |
| 1:A:315:G:H2'    | 1:A:316:C:C6   | 2.16                     | 0.80              |
| 1:A:127:G:H2'    | 1:A:128:G:H4'  | 1.66                     | 0.78              |
| 2:B:86:ARG:NH1   | 3:C:-32:G:H1'  | 1.99                     | 0.77              |
| 1:A:159:C:H3'    | 1:A:160:C:C5   | 2.19                     | 0.76              |
| 1:A:352:U:H3     | 1:A:377:A:H2   | 1.34                     | 0.76              |
| 1:A:158:U:H2'    | 1:A:159:C:N1   | 2.01                     | 0.75              |
| 1:A:45:A:H62     | 2:B:62:ARG:NH2 | 1.84                     | 0.75              |
| 3:C:-10:G:H3'    | 3:C:-9:G:H8    | 1.51                     | 0.74              |
| 1:A:14:G:H2'     | 1:A:385:A:N1   | 2.03                     | 0.74              |
| 1:A:158:U:C2'    | 1:A:159:C:C1'  | 2.66                     | 0.73              |
| 1:A:158:U:H3'    | 1:A:159:C:H6   | 0.94                     | 0.73              |
| 1:A:45:A:C2      | 1:A:388:G:H2'  | 2.24                     | 0.73              |
| 1:A:50:A:C8      | 1:A:50:A:H5''  | 2.23                     | 0.72              |
| 1:A:158:U:H3'    | 1:A:159:C:C5   | 2.17                     | 0.72              |
| 1:A:350:A:H3'    | 1:A:351:G:C8   | 2.24                     | 0.72              |
| 1:A:350:A:H3'    | 1:A:351:G:H8   | 1.56                     | 0.71              |
| 1:A:216:A:HO2'   | 1:A:217:A:H8   | 1.39                     | 0.70              |
| 1:A:364:A:C5     | 1:A:365:G:H1'  | 2.27                     | 0.68              |
| 1:A:158:U:C2'    | 1:A:159:C:H1'  | 2.23                     | 0.68              |
| 1:A:363:A:C8     | 1:A:363:A:H5'' | 2.28                     | 0.68              |
| 1:A:349:G:H1     | 1:A:379:G:H1'  | 1.58                     | 0.68              |
| 1:A:180:U:H2'    | 1:A:181:A:H8   | 1.59                     | 0.68              |
| 1:A:159:C:H3'    | 1:A:160:C:C6   | 2.29                     | 0.68              |
| 2:B:0:GLY:HA3    | 2:B:65:ARG:HB3 | 1.75                     | 0.68              |
| 1:A:9:U:H2'      | 1:A:10:G:H8    | 1.57                     | 0.67              |
| 3:C:23:A:H3'     | 3:C:24:C:H6    | 1.60                     | 0.67              |

Continued on next page...

Continued from previous page...

| Atom-1          | Atom-2           | Interatomic distance (Å) | Clash overlap (Å) |
|-----------------|------------------|--------------------------|-------------------|
| 1:A:158:U:C2'   | 1:A:159:C:C6     | 2.77                     | 0.67              |
| 1:A:67:U:H3     | 1:A:69:C:H41     | 1.43                     | 0.66              |
| 1:A:364:A:H3'   | 1:A:365:G:O4'    | 1.95                     | 0.66              |
| 1:A:308:A:N1    | 1:A:329:U:H5     | 1.95                     | 0.65              |
| 1:A:363:A:O3'   | 1:A:364:A:O4'    | 2.15                     | 0.65              |
| 1:A:379:G:H5''  | 1:A:380:A:OP1    | 1.96                     | 0.65              |
| 2:B:112:LYS:O   | 2:B:114:GLU:N    | 2.31                     | 0.64              |
| 1:A:374:A:H2'   | 1:A:375:G:C8     | 2.32                     | 0.64              |
| 1:A:18:A:H2'    | 1:A:19:A:H8      | 1.62                     | 0.64              |
| 3:C:11:U:C3'    | 3:C:12:U:P       | 2.86                     | 0.64              |
| 1:A:272:G:H5''  | 1:A:272:G:H8     | 1.62                     | 0.64              |
| 3:C:-10:G:H3'   | 3:C:-9:G:C8      | 2.33                     | 0.64              |
| 1:A:102:C:H2'   | 1:A:103:C:O4'    | 1.99                     | 0.63              |
| 2:B:56:VAL:O    | 2:B:60:ILE:HG13  | 2.00                     | 0.62              |
| 1:A:316:C:H2'   | 1:A:317:G:C8     | 2.35                     | 0.62              |
| 1:A:160:C:O4'   | 1:A:160:C:OP2    | 2.04                     | 0.61              |
| 1:A:308:A:N1    | 1:A:329:U:C5     | 2.69                     | 0.61              |
| 1:A:3:U:H2'     | 1:A:4:A:C8       | 2.36                     | 0.61              |
| 1:A:314:G:H1    | 1:A:323:A:N6     | 1.99                     | 0.61              |
| 1:A:45:A:H62    | 2:B:62:ARG:HH22  | 1.47                     | 0.61              |
| 1:A:82:A:OP2    | 4:A:526:CA:CA    | 1.78                     | 0.61              |
| 1:A:203:G:C5    | 1:A:205:A:H1'    | 2.36                     | 0.61              |
| 3:C:-7:U:H2'    | 3:C:-6:C:C6      | 2.35                     | 0.61              |
| 1:A:350:A:H1'   | 1:A:380:A:N1     | 2.15                     | 0.60              |
| 2:B:64:ILE:HG23 | 2:B:101:LEU:HD21 | 1.84                     | 0.60              |
| 2:B:113:LYS:C   | 2:B:115:ALA:H    | 2.08                     | 0.60              |
| 1:A:360:G:H22   | 1:A:363:A:H5''   | 1.67                     | 0.59              |
| 1:A:161:G:H4'   | 1:A:163:C:H5     | 1.65                     | 0.59              |
| 2:B:12:GLU:HG2  | 2:B:42:ARG:HH22  | 1.67                     | 0.59              |
| 1:A:71:G:O2'    | 1:A:73:G:N7      | 2.31                     | 0.59              |
| 1:A:350:A:H1'   | 1:A:380:A:C6     | 2.37                     | 0.59              |
| 1:A:385:A:H8    | 1:A:400:U:HO2'   | 1.47                     | 0.59              |
| 2:B:4:LYS:HD3   | 2:B:5:TYR:HE1    | 1.68                     | 0.58              |
| 1:A:18:A:H2'    | 1:A:19:A:C8      | 2.37                     | 0.58              |
| 1:A:130:U:H2'   | 1:A:131:G:C8     | 2.38                     | 0.58              |
| 1:A:147:A:H61   | 1:A:177:G:H2'    | 1.68                     | 0.58              |
| 3:C:-17:U:H3'   | 3:C:-16:G:H8     | 1.68                     | 0.58              |
| 1:A:158:U:O3'   | 1:A:159:C:H6     | 1.87                     | 0.58              |
| 1:A:159:C:H2'   | 1:A:159:C:O2     | 2.03                     | 0.58              |
| 1:A:360:G:N2    | 1:A:363:A:H5''   | 2.18                     | 0.58              |
| 1:A:158:U:C3'   | 1:A:159:C:O4'    | 2.52                     | 0.58              |

Continued on next page...

Continued from previous page...

| Atom-1           | Atom-2           | Interatomic distance (Å) | Clash overlap (Å) |
|------------------|------------------|--------------------------|-------------------|
| 1:A:315:G:C5     | 1:A:316:C:C4     | 2.91                     | 0.58              |
| 1:A:16:G:N2      | 1:A:344:C:H1'    | 2.19                     | 0.57              |
| 2:B:112:LYS:O    | 2:B:113:LYS:C    | 2.47                     | 0.57              |
| 1:A:32:G:H22     | 1:A:34:U:H1'     | 1.68                     | 0.57              |
| 1:A:272:G:H5''   | 1:A:272:G:C8     | 2.40                     | 0.57              |
| 1:A:6:U:H2'      | 1:A:7:C:C6       | 2.40                     | 0.57              |
| 1:A:350:A:C2     | 1:A:380:A:H1'    | 2.39                     | 0.57              |
| 2:B:74:GLU:OE1   | 2:B:111:LEU:HD22 | 2.05                     | 0.56              |
| 1:A:3:U:H2'      | 1:A:4:A:H8       | 1.68                     | 0.56              |
| 1:A:10:G:H2'     | 1:A:11:C:H6      | 1.70                     | 0.56              |
| 1:A:148:A:H61    | 1:A:177:G:H1'    | 1.71                     | 0.56              |
| 1:A:308:A:C2     | 1:A:329:U:H5     | 2.23                     | 0.56              |
| 1:A:2:U:H2'      | 1:A:3:U:C6       | 2.40                     | 0.56              |
| 1:A:315:G:H2'    | 1:A:316:C:H6     | 1.67                     | 0.56              |
| 1:A:9:U:H2'      | 1:A:10:G:C8      | 2.39                     | 0.56              |
| 1:A:241:A:H2'    | 1:A:242:C:C6     | 2.41                     | 0.56              |
| 2:B:4:LYS:HD3    | 2:B:5:TYR:CE1    | 2.40                     | 0.56              |
| 1:A:380:A:C6     | 1:A:381:A:C5     | 2.94                     | 0.56              |
| 1:A:360:G:H22    | 1:A:363:A:C5'    | 2.19                     | 0.56              |
| 1:A:385:A:H1'    | 1:A:401:A:C8     | 2.41                     | 0.56              |
| 1:A:16:G:C2      | 1:A:344:C:C2     | 2.94                     | 0.56              |
| 1:A:158:U:C2'    | 1:A:159:C:N1     | 2.69                     | 0.56              |
| 1:A:364:A:H3'    | 1:A:364:A:OP2    | 2.06                     | 0.56              |
| 1:A:364:A:OP2    | 1:A:365:G:O4'    | 2.21                     | 0.56              |
| 1:A:412:A:H2'    | 1:A:413:A:C8     | 2.42                     | 0.55              |
| 1:A:5:A:H2'      | 1:A:6:U:C6       | 2.41                     | 0.55              |
| 3:C:-15:G:H2'    | 3:C:-14:A:H8     | 1.70                     | 0.55              |
| 3:C:27:C:H2'     | 3:C:28:A:C8      | 2.41                     | 0.55              |
| 1:A:4:A:H2'      | 1:A:5:A:H8       | 1.70                     | 0.55              |
| 1:A:5:A:H2'      | 1:A:6:U:H6       | 1.71                     | 0.55              |
| 1:A:364:A:OP1    | 1:A:365:G:N7     | 2.36                     | 0.54              |
| 1:A:99:A:H2'     | 1:A:100:A:C8     | 2.41                     | 0.54              |
| 3:C:10:G:N3      | 3:C:10:G:H2'     | 2.23                     | 0.54              |
| 1:A:197:A:H2'    | 1:A:228:U:O2'    | 2.06                     | 0.54              |
| 2:B:106:ARG:HH11 | 2:B:113:LYS:CA   | 2.16                     | 0.54              |
| 1:A:161:G:H4'    | 1:A:163:C:C5     | 2.42                     | 0.54              |
| 1:A:381:A:C2     | 1:A:382:G:H1'    | 2.42                     | 0.54              |
| 1:A:414:C:H2'    | 1:A:415:G:H8     | 1.72                     | 0.54              |
| 1:A:7:C:H2'      | 1:A:8:A:H8       | 1.72                     | 0.54              |
| 1:A:218:A:C5     | 1:A:219:C:H1'    | 2.43                     | 0.53              |
| 1:A:36:C:H2'     | 1:A:37:G:C8      | 2.42                     | 0.53              |

Continued on next page...

Continued from previous page...

| Atom-1         | Atom-2         | Interatomic distance (Å) | Clash overlap (Å) |
|----------------|----------------|--------------------------|-------------------|
| 3:C:-8:A:H2'   | 3:C:-7:U:O4'   | 2.08                     | 0.53              |
| 3:C:15:G:H2'   | 3:C:58:G:H1    | 1.74                     | 0.53              |
| 1:A:14:G:H2'   | 1:A:385:A:C6   | 2.44                     | 0.53              |
| 1:A:4:A:H2'    | 1:A:5:A:C8     | 2.44                     | 0.53              |
| 1:A:122:G:H3'  | 1:A:123:C:H5'' | 1.90                     | 0.53              |
| 1:A:364:A:C3'  | 1:A:365:G:O4'  | 2.56                     | 0.53              |
| 1:A:154:U:H2'  | 1:A:155:A:C5   | 2.44                     | 0.52              |
| 1:A:159:C:H3'  | 1:A:160:C:C4   | 2.44                     | 0.52              |
| 1:A:264:U:H2'  | 1:A:265:G:O4'  | 2.09                     | 0.52              |
| 1:A:216:A:O2'  | 1:A:217:A:H8   | 1.93                     | 0.52              |
| 3:C:8:U:H5'    | 3:C:48:G:H5'   | 1.91                     | 0.52              |
| 3:C:9:A:C2     | 3:C:44:G:H1'   | 2.44                     | 0.52              |
| 1:A:363:A:H5'' | 1:A:363:A:H8   | 1.74                     | 0.52              |
| 1:A:229:G:N2   | 1:A:231:A:H3'  | 2.25                     | 0.52              |
| 1:A:154:U:H2'  | 1:A:155:A:C4   | 2.45                     | 0.52              |
| 1:A:49:A:N1    | 1:A:387:A:O2'  | 2.37                     | 0.51              |
| 1:A:134:C:H2'  | 1:A:135:U:C6   | 2.45                     | 0.51              |
| 1:A:124:U:H2'  | 1:A:125:U:O4'  | 2.11                     | 0.51              |
| 1:A:6:U:H2'    | 1:A:7:C:H6     | 1.74                     | 0.51              |
| 1:A:158:U:O3'  | 1:A:159:C:C6   | 2.62                     | 0.51              |
| 1:A:64:C:O2'   | 1:A:82:A:N1    | 2.42                     | 0.51              |
| 1:A:128:G:H2'  | 1:A:129:C:C6   | 2.46                     | 0.51              |
| 1:A:169:U:H2'  | 1:A:170:A:H8   | 1.76                     | 0.51              |
| 1:A:147:A:N6   | 1:A:177:G:H2'  | 2.26                     | 0.51              |
| 3:C:-13:U:H2'  | 3:C:-12:C:C6   | 2.46                     | 0.50              |
| 1:A:10:G:H2'   | 1:A:11:C:C6    | 2.47                     | 0.50              |
| 1:A:317:G:N1   | 1:A:321:G:C2   | 2.79                     | 0.50              |
| 1:A:70:U:H2'   | 1:A:71:G:O4'   | 2.10                     | 0.50              |
| 1:A:361:C:O2'  | 1:A:362:A:H3'  | 2.12                     | 0.50              |
| 1:A:373:C:H2'  | 1:A:374:A:C8   | 2.47                     | 0.50              |
| 1:A:71:G:N2    | 1:A:73:G:H3'   | 2.26                     | 0.50              |
| 1:A:356:A:H3'  | 1:A:357:G:H8   | 1.77                     | 0.50              |
| 3:C:-22:C:H2'  | 3:C:-21:C:C6   | 2.47                     | 0.50              |
| 1:A:350:A:H1'  | 1:A:380:A:C4   | 2.46                     | 0.50              |
| 3:C:8:U:O2     | 3:C:20:A:H2    | 1.95                     | 0.49              |
| 1:A:180:U:H2'  | 1:A:181:A:C8   | 2.45                     | 0.49              |
| 1:A:92:C:H2'   | 1:A:93:C:C6    | 2.47                     | 0.49              |
| 1:A:158:U:C3'  | 1:A:159:C:C1'  | 2.90                     | 0.49              |
| 1:A:130:U:H2'  | 1:A:131:G:H8   | 1.78                     | 0.49              |
| 1:A:147:A:H2'  | 1:A:148:A:C8   | 2.48                     | 0.49              |
| 1:A:169:U:H2'  | 1:A:170:A:C8   | 2.47                     | 0.49              |

Continued on next page...

*Continued from previous page...*

| Atom-1         | Atom-2         | Interatomic distance (Å) | Clash overlap (Å) |
|----------------|----------------|--------------------------|-------------------|
| 1:A:363:A:O2'  | 1:A:364:A:C1'  | 2.60                     | 0.49              |
| 3:C:-30:A:H2'  | 3:C:-29:U:O4'  | 2.12                     | 0.49              |
| 1:A:377:A:C2   | 1:A:378:C:H1'  | 2.48                     | 0.49              |
| 1:A:267:U:C2   | 3:C:75:A:C2    | 3.01                     | 0.49              |
| 1:A:19:A:H2'   | 1:A:20:U:C6    | 2.48                     | 0.48              |
| 1:A:401:A:H2'  | 1:A:402:G:O4'  | 2.13                     | 0.48              |
| 3:C:24:C:H2'   | 3:C:25:A:O4'   | 2.13                     | 0.48              |
| 1:A:23:C:O2    | 1:A:336:A:O2'  | 2.28                     | 0.48              |
| 1:A:115:C:H2'  | 1:A:116:A:C8   | 2.48                     | 0.48              |
| 1:A:338:G:H2'  | 1:A:339:A:C8   | 2.49                     | 0.48              |
| 3:C:-29:U:H2'  | 3:C:-28:C:O4'  | 2.13                     | 0.48              |
| 1:A:354:C:H2'  | 1:A:355:G:C8   | 2.49                     | 0.48              |
| 1:A:280:U:H2'  | 1:A:281:U:C6   | 2.48                     | 0.48              |
| 3:C:12:U:H2'   | 3:C:13:C:O4'   | 2.14                     | 0.48              |
| 1:A:132:G:H3'  | 1:A:133:G:H8   | 1.79                     | 0.48              |
| 1:A:301:G:C2'  | 1:A:302:G:H5'  | 2.43                     | 0.48              |
| 3:C:23:A:H3'   | 3:C:24:C:C6    | 2.46                     | 0.48              |
| 3:C:17:G:O6    | 3:C:54:U:H1'   | 2.14                     | 0.48              |
| 1:A:30:C:H2'   | 1:A:31:G:C8    | 2.49                     | 0.48              |
| 1:A:180:U:O2'  | 1:A:181:A:H5'  | 2.13                     | 0.48              |
| 1:A:378:C:H2'  | 1:A:379:G:O4'  | 2.13                     | 0.48              |
| 1:A:280:U:H2'  | 1:A:281:U:H6   | 1.79                     | 0.47              |
| 1:A:349:G:N2   | 1:A:380:A:C8   | 2.82                     | 0.47              |
| 1:A:411:U:H2'  | 1:A:412:A:C8   | 2.48                     | 0.47              |
| 1:A:268:G:O6   | 3:C:75:A:N6    | 2.47                     | 0.47              |
| 3:C:21:G:H2'   | 3:C:22:A:C8    | 2.49                     | 0.47              |
| 1:A:360:G:H1'  | 1:A:365:G:N2   | 2.29                     | 0.47              |
| 1:A:7:C:H2'    | 1:A:8:A:C8     | 2.49                     | 0.47              |
| 1:A:137:A:H8   | 1:A:137:A:H5'' | 1.79                     | 0.47              |
| 1:A:335:G:C8   | 1:A:335:G:H3'  | 2.49                     | 0.47              |
| 1:A:47:G:H1    | 1:A:385:A:H62  | 1.63                     | 0.47              |
| 1:A:338:G:H2'  | 1:A:339:A:H8   | 1.80                     | 0.47              |
| 2:B:105:LEU:CB | 2:B:111:LEU:HG | 2.34                     | 0.47              |
| 1:A:371:U:H4'  | 1:A:373:C:H5   | 1.79                     | 0.47              |
| 1:A:160:C:O4'  | 1:A:160:C:P    | 2.72                     | 0.46              |
| 1:A:363:A:O2'  | 1:A:364:A:O4'  | 2.33                     | 0.46              |
| 2:B:111:LEU:O  | 2:B:113:LYS:N  | 2.46                     | 0.46              |
| 3:C:25:A:H2    | 3:C:43:G:H22   | 1.63                     | 0.46              |
| 1:A:36:C:H2'   | 1:A:37:G:H8    | 1.80                     | 0.46              |
| 1:A:50:A:H3'   | 1:A:51:G:H8    | 1.80                     | 0.46              |
| 1:A:158:U:H2'  | 1:A:159:C:C6   | 2.49                     | 0.46              |

*Continued on next page...*

*Continued from previous page...*

| Atom-1           | Atom-2         | Interatomic distance (Å) | Clash overlap (Å) |
|------------------|----------------|--------------------------|-------------------|
| 3:C:37:A:H2'     | 3:C:38:G:C8    | 2.51                     | 0.46              |
| 1:A:198:G:N2     | 1:A:200:G:H3'  | 2.31                     | 0.46              |
| 3:C:38:G:H2'     | 3:C:39:G:C8    | 2.51                     | 0.46              |
| 1:A:158:U:C3'    | 1:A:159:C:N1   | 2.75                     | 0.46              |
| 1:A:186:G:N1     | 1:A:189:A:OP2  | 2.41                     | 0.46              |
| 1:A:137:A:H5''   | 1:A:137:A:C8   | 2.51                     | 0.46              |
| 1:A:319:A:H1'    | 1:A:320:U:C5   | 2.51                     | 0.46              |
| 1:A:292:A:H2'    | 1:A:293:U:C6   | 2.51                     | 0.45              |
| 1:A:315:G:C6     | 1:A:316:C:C4   | 3.03                     | 0.45              |
| 1:A:352:U:H2'    | 1:A:353:A:C8   | 2.51                     | 0.45              |
| 1:A:376:U:H3'    | 1:A:377:A:H8   | 1.82                     | 0.45              |
| 3:C:-20:U:H2'    | 3:C:-19:U:O4'  | 2.16                     | 0.45              |
| 1:A:68:G:N3      | 1:A:68:G:H2'   | 2.31                     | 0.45              |
| 1:A:268:G:C6     | 3:C:75:A:N1    | 2.85                     | 0.45              |
| 3:C:-13:U:H2'    | 3:C:-12:C:H6   | 1.79                     | 0.45              |
| 3:C:11:U:H3      | 3:C:23:A:H61   | 1.64                     | 0.45              |
| 3:C:60:C:H2'     | 3:C:61:C:H6    | 1.80                     | 0.45              |
| 1:A:32:G:H2'     | 1:A:32:G:N3    | 2.32                     | 0.45              |
| 1:A:292:A:H2'    | 1:A:293:U:H6   | 1.82                     | 0.45              |
| 1:A:360:G:H3'    | 1:A:361:C:H6   | 1.82                     | 0.45              |
| 2:B:12:GLU:HG2   | 2:B:42:ARG:NH2 | 2.32                     | 0.45              |
| 1:A:114:G:H2'    | 1:A:115:C:C6   | 2.52                     | 0.45              |
| 1:A:158:U:O3'    | 1:A:159:C:C1'  | 2.61                     | 0.45              |
| 1:A:350:A:C1'    | 1:A:380:A:C6   | 2.99                     | 0.45              |
| 1:A:416:U:H2'    | 1:A:417:C:O4'  | 2.17                     | 0.45              |
| 3:C:19:U:H6      | 3:C:19:U:H2'   | 1.66                     | 0.45              |
| 1:A:339:A:H2'    | 1:A:340:U:C6   | 2.53                     | 0.44              |
| 1:A:350:A:H1'    | 1:A:380:A:C5   | 2.52                     | 0.44              |
| 1:A:364:A:H2'    | 1:A:365:G:O4'  | 2.18                     | 0.44              |
| 1:A:17:U:H2'     | 1:A:18:A:H8    | 1.82                     | 0.44              |
| 1:A:331:G:H4'    | 1:A:332:A:H5'  | 1.98                     | 0.44              |
| 2:B:3:LYS:HB3    | 2:B:8:LYS:HE3  | 1.99                     | 0.44              |
| 1:A:14:G:C2'     | 1:A:401:A:H61  | 2.31                     | 0.44              |
| 1:A:32:G:N2      | 1:A:34:U:H1'   | 2.32                     | 0.44              |
| 1:A:358:G:H1     | 1:A:366:C:H42  | 1.66                     | 0.44              |
| 1:A:242:C:H2'    | 1:A:243:C:O4'  | 2.18                     | 0.44              |
| 1:A:365:G:H2'    | 1:A:365:G:N3   | 2.33                     | 0.44              |
| 1:A:82:A:H2'     | 1:A:83:G:O4'   | 2.17                     | 0.43              |
| 1:A:238:U:H4'    | 3:C:54:U:H5''  | 2.00                     | 0.43              |
| 2:B:105:LEU:HD12 | 2:B:105:LEU:HA | 1.80                     | 0.43              |
| 1:A:67:U:H3      | 1:A:69:C:N4    | 2.13                     | 0.43              |

*Continued on next page...*

*Continued from previous page...*

| Atom-1         | Atom-2          | Interatomic distance (Å) | Clash overlap (Å) |
|----------------|-----------------|--------------------------|-------------------|
| 1:A:312:G:C2   | 1:A:326:C:C2    | 3.07                     | 0.43              |
| 1:A:376:U:H2'  | 1:A:377:A:C8    | 2.53                     | 0.43              |
| 1:A:18:A:C6    | 1:A:342:A:N1    | 2.86                     | 0.43              |
| 1:A:217:A:H2'  | 1:A:218:A:O4'   | 2.18                     | 0.43              |
| 1:A:355:G:H2'  | 1:A:356:A:C8    | 2.54                     | 0.43              |
| 3:C:34:C:H2'   | 3:C:35:C:H6     | 1.83                     | 0.43              |
| 1:A:204:G:N1   | 1:A:235:C:N3    | 2.67                     | 0.43              |
| 1:A:123:C:H2'  | 1:A:124:U:O4'   | 2.19                     | 0.43              |
| 1:A:160:C:OP2  | 1:A:160:C:C4'   | 2.65                     | 0.43              |
| 2:B:24:ALA:HB2 | 2:B:29:VAL:HG13 | 1.98                     | 0.43              |
| 1:A:159:C:O4'  | 1:A:159:C:P     | 2.72                     | 0.43              |
| 1:A:186:G:N2   | 1:A:188:A:H3'   | 2.33                     | 0.43              |
| 1:A:317:G:C5   | 1:A:318:C:N3    | 2.86                     | 0.43              |
| 2:B:73:GLU:N   | 2:B:73:GLU:OE1  | 2.52                     | 0.43              |
| 1:A:383:G:H2'  | 1:A:383:G:N3    | 2.34                     | 0.43              |
| 1:A:50:A:N3    | 1:A:50:A:H2'    | 2.34                     | 0.43              |
| 1:A:349:G:N1   | 1:A:379:G:H1'   | 2.31                     | 0.43              |
| 1:A:63:A:H2'   | 1:A:64:C:O4'    | 2.19                     | 0.43              |
| 1:A:235:C:H6   | 1:A:235:C:H2'   | 1.69                     | 0.43              |
| 1:A:156:C:H1'  | 1:A:216:A:C2    | 2.54                     | 0.43              |
| 1:A:200:G:C6   | 1:A:232:A:C5    | 3.07                     | 0.43              |
| 1:A:324:G:H2'  | 1:A:325:C:H6    | 1.84                     | 0.43              |
| 1:A:380:A:C2   | 1:A:381:A:C4    | 3.07                     | 0.43              |
| 2:B:49:LYS:HG3 | 3:C:-1:U:O5'    | 2.19                     | 0.43              |
| 1:A:375:G:C4   | 1:A:376:U:H1'   | 2.54                     | 0.42              |
| 3:C:-22:C:H2'  | 3:C:-21:C:H6    | 1.83                     | 0.42              |
| 1:A:95:A:H2'   | 1:A:96:G:C8     | 2.55                     | 0.42              |
| 1:A:308:A:H2'  | 1:A:309:C:O4'   | 2.19                     | 0.42              |
| 1:A:364:A:H3'  | 1:A:364:A:P     | 2.60                     | 0.42              |
| 1:A:406:A:H2'  | 1:A:407:U:O4'   | 2.20                     | 0.42              |
| 1:A:414:C:H2'  | 1:A:415:G:C8    | 2.53                     | 0.42              |
| 2:B:11:GLU:O   | 2:B:15:GLU:HG3  | 2.19                     | 0.42              |
| 1:A:17:U:H2'   | 1:A:18:A:C8     | 2.55                     | 0.42              |
| 1:A:95:A:H2'   | 1:A:96:G:H8     | 1.85                     | 0.42              |
| 1:A:128:G:H2'  | 1:A:129:C:H6    | 1.82                     | 0.42              |
| 1:A:260:C:H2'  | 1:A:261:A:O4'   | 2.20                     | 0.42              |
| 1:A:349:G:N2   | 1:A:350:A:N7    | 2.68                     | 0.42              |
| 3:C:-11:C:C2   | 3:C:-10:G:C8    | 3.08                     | 0.42              |
| 1:A:335:G:C8   | 1:A:335:G:C3'   | 3.03                     | 0.42              |
| 1:A:199:U:H5   | 1:A:206:G:H1'   | 1.84                     | 0.42              |
| 1:A:321:G:H2'  | 1:A:322:C:C6    | 2.55                     | 0.42              |

*Continued on next page...*

Continued from previous page...

| Atom-1         | Atom-2          | Interatomic distance (Å) | Clash overlap (Å) |
|----------------|-----------------|--------------------------|-------------------|
| 1:A:335:G:H3'  | 1:A:335:G:H8    | 1.85                     | 0.42              |
| 3:C:35:C:H2'   | 3:C:36:A:O4'    | 2.20                     | 0.42              |
| 1:A:155:A:H2'  | 1:A:156:C:C6    | 2.55                     | 0.42              |
| 1:A:334:A:H62  | 2:B:10:ASN:ND2  | 2.17                     | 0.42              |
| 1:A:380:A:H3'  | 1:A:381:A:H8    | 1.85                     | 0.42              |
| 1:A:92:C:H2'   | 1:A:93:C:H6     | 1.85                     | 0.41              |
| 1:A:354:C:H2'  | 1:A:355:G:O4'   | 2.19                     | 0.41              |
| 1:A:381:A:H5'' | 1:A:382:G:H8    | 1.85                     | 0.41              |
| 3:C:18:G:H5'   | 3:C:56:G:N2     | 2.34                     | 0.41              |
| 1:A:10:G:C6    | 1:A:406:A:N1    | 2.88                     | 0.41              |
| 1:A:115:C:H2'  | 1:A:116:A:H8    | 1.85                     | 0.41              |
| 1:A:279:C:H2'  | 1:A:280:U:H6    | 1.85                     | 0.41              |
| 2:B:49:LYS:HD2 | 3:C:-1:U:H5'    | 2.02                     | 0.41              |
| 3:C:27:C:H2'   | 3:C:28:A:H8     | 1.85                     | 0.41              |
| 1:A:279:C:H2'  | 1:A:280:U:C6    | 2.55                     | 0.41              |
| 1:A:353:A:H2'  | 1:A:354:C:O4'   | 2.21                     | 0.41              |
| 1:A:9:U:C2     | 1:A:10:G:C8     | 3.09                     | 0.41              |
| 1:A:41:G:H2'   | 1:A:42:U:O4'    | 2.20                     | 0.41              |
| 1:A:157:G:H2'  | 1:A:158:U:O4'   | 2.20                     | 0.41              |
| 1:A:221:U:H2'  | 1:A:222:U:C6    | 2.55                     | 0.41              |
| 1:A:245:C:H2'  | 1:A:246:A:C8    | 2.55                     | 0.41              |
| 1:A:334:A:H62  | 2:B:10:ASN:HD22 | 1.68                     | 0.41              |
| 1:A:377:A:C6   | 1:A:378:C:H1'   | 2.55                     | 0.41              |
| 1:A:45:A:H2    | 1:A:388:G:H2'   | 1.82                     | 0.41              |
| 1:A:56:U:H2'   | 1:A:57:G:H8     | 1.85                     | 0.41              |
| 1:A:148:A:H3'  | 1:A:149:G:H8    | 1.86                     | 0.41              |
| 1:A:266:A:N3   | 1:A:266:A:H2'   | 2.36                     | 0.41              |
| 1:A:381:A:H5'' | 1:A:382:G:C8    | 2.56                     | 0.41              |
| 3:C:18:G:N2    | 3:C:56:G:H1'    | 2.36                     | 0.41              |
| 1:A:133:G:C2'  | 1:A:134:C:H5'   | 2.50                     | 0.41              |
| 1:A:182:C:C2'  | 1:A:183:C:H5'   | 2.50                     | 0.41              |
| 1:A:315:G:C2   | 1:A:323:A:C2    | 3.08                     | 0.41              |
| 2:B:113:LYS:C  | 2:B:115:ALA:N   | 2.74                     | 0.41              |
| 1:A:148:A:N6   | 1:A:177:G:H1'   | 2.33                     | 0.41              |
| 1:A:180:U:C2'  | 1:A:181:A:H5'   | 2.51                     | 0.41              |
| 1:A:199:U:O2   | 1:A:199:U:O4'   | 2.38                     | 0.41              |
| 1:A:281:U:H2'  | 1:A:282:C:H6    | 1.86                     | 0.41              |
| 1:A:351:G:H2'  | 1:A:352:U:C6    | 2.56                     | 0.41              |
| 1:A:356:A:H3'  | 1:A:357:G:C8    | 2.56                     | 0.41              |
| 2:B:99:LYS:HB2 | 2:B:99:LYS:HE3  | 1.71                     | 0.41              |
| 3:C:67:U:H2'   | 3:C:68:C:O4'    | 2.20                     | 0.41              |

Continued on next page...

Continued from previous page...

| Atom-1           | Atom-2         | Interatomic distance (Å) | Clash overlap (Å) |
|------------------|----------------|--------------------------|-------------------|
| 1:A:195:A:H1'    | 3:C:18:G:N7    | 2.36                     | 0.40              |
| 1:A:287:A:H3'    | 1:A:288:G:H8   | 1.85                     | 0.40              |
| 1:A:322:C:H2'    | 1:A:323:A:C8   | 2.55                     | 0.40              |
| 3:C:10:G:H3'     | 3:C:11:U:C6    | 2.56                     | 0.40              |
| 1:A:19:A:H2'     | 1:A:20:U:H6    | 1.85                     | 0.40              |
| 1:A:159:C:H5''   | 1:A:160:C:N4   | 2.36                     | 0.40              |
| 1:A:350:A:C5     | 1:A:380:A:C8   | 3.09                     | 0.40              |
| 1:A:352:U:H2'    | 1:A:353:A:H8   | 1.86                     | 0.40              |
| 1:A:117:G:H3'    | 1:A:118:C:H6   | 1.86                     | 0.40              |
| 1:A:32:G:H3'     | 1:A:33:U:C6    | 2.57                     | 0.40              |
| 1:A:268:G:C6     | 3:C:75:A:C6    | 3.10                     | 0.40              |
| 1:A:357:G:H22    | 1:A:367:C:H42  | 1.70                     | 0.40              |
| 2:B:101:LEU:HD12 | 2:B:101:LEU:HA | 1.81                     | 0.40              |

There are no symmetry-related clashes.

### 5.3 Torsion angles [i](#)

#### 5.3.1 Protein backbone [i](#)

In the following table, the Percentiles column shows the percent Ramachandran outliers of the chain as a percentile score with respect to all PDB entries followed by that with respect to all EM entries.

The Analysed column shows the number of residues for which the backbone conformation was analysed, and the total number of residues.

| Mol | Chain | Analysed      | Favoured  | Allowed | Outliers | Percentiles          |
|-----|-------|---------------|-----------|---------|----------|----------------------|
| 2   | B     | 114/116 (98%) | 109 (96%) | 3 (3%)  | 2 (2%)   | <b>7</b>   <b>18</b> |

All (2) Ramachandran outliers are listed below:

| Mol | Chain | Res | Type |
|-----|-------|-----|------|
| 2   | B     | 113 | LYS  |
| 2   | B     | 112 | LYS  |

#### 5.3.2 Protein sidechains [i](#)

In the following table, the Percentiles column shows the percent sidechain outliers of the chain as a percentile score with respect to all PDB entries followed by that with respect to all EM

entries.

The Analysed column shows the number of residues for which the sidechain conformation was analysed, and the total number of residues.

| Mol | Chain | Analysed     | Rotameric | Outliers | Percentiles |
|-----|-------|--------------|-----------|----------|-------------|
| 2   | B     | 99/99 (100%) | 90 (91%)  | 9 (9%)   | 7 19        |

All (9) residues with a non-rotameric sidechain are listed below:

| Mol | Chain | Res | Type |
|-----|-------|-----|------|
| 2   | B     | 3   | LYS  |
| 2   | B     | 4   | LYS  |
| 2   | B     | 71  | LEU  |
| 2   | B     | 92  | MET  |
| 2   | B     | 99  | LYS  |
| 2   | B     | 105 | LEU  |
| 2   | B     | 112 | LYS  |
| 2   | B     | 113 | LYS  |
| 2   | B     | 114 | GLU  |

Sometimes sidechains can be flipped to improve hydrogen bonding and reduce clashes. All (3) such sidechains are listed below:

| Mol | Chain | Res | Type |
|-----|-------|-----|------|
| 2   | B     | 10  | ASN  |
| 2   | B     | 14  | GLN  |
| 2   | B     | 87  | GLN  |

### 5.3.3 RNA [i](#)

| Mol | Chain | Analysed      | Backbone Outliers | Pucker Outliers |
|-----|-------|---------------|-------------------|-----------------|
| 1   | A     | 416/417 (99%) | 177 (42%)         | 19 (4%)         |
| 3   | C     | 107/111 (96%) | 49 (45%)          | 9 (8%)          |
| All | All   | 523/528 (99%) | 226 (43%)         | 28 (5%)         |

All (226) RNA backbone outliers are listed below:

| Mol | Chain | Res | Type |
|-----|-------|-----|------|
| 1   | A     | 2   | U    |
| 1   | A     | 9   | U    |
| 1   | A     | 11  | C    |
| 1   | A     | 15  | G    |

*Continued on next page...*

*Continued from previous page...*

| Mol | Chain | Res | Type |
|-----|-------|-----|------|
| 1   | A     | 28  | G    |
| 1   | A     | 30  | C    |
| 1   | A     | 32  | G    |
| 1   | A     | 33  | U    |
| 1   | A     | 35  | U    |
| 1   | A     | 36  | C    |
| 1   | A     | 42  | U    |
| 1   | A     | 47  | G    |
| 1   | A     | 48  | A    |
| 1   | A     | 49  | A    |
| 1   | A     | 50  | A    |
| 1   | A     | 51  | G    |
| 1   | A     | 52  | U    |
| 1   | A     | 53  | C    |
| 1   | A     | 54  | C    |
| 1   | A     | 67  | U    |
| 1   | A     | 68  | G    |
| 1   | A     | 70  | U    |
| 1   | A     | 74  | A    |
| 1   | A     | 75  | U    |
| 1   | A     | 76  | G    |
| 1   | A     | 85  | G    |
| 1   | A     | 87  | U    |
| 1   | A     | 88  | C    |
| 1   | A     | 90  | U    |
| 1   | A     | 91  | G    |
| 1   | A     | 92  | C    |
| 1   | A     | 99  | A    |
| 1   | A     | 101 | U    |
| 1   | A     | 102 | C    |
| 1   | A     | 108 | G    |
| 1   | A     | 117 | G    |
| 1   | A     | 118 | C    |
| 1   | A     | 122 | G    |
| 1   | A     | 123 | C    |
| 1   | A     | 126 | U    |
| 1   | A     | 127 | G    |
| 1   | A     | 128 | G    |
| 1   | A     | 130 | U    |
| 1   | A     | 131 | G    |
| 1   | A     | 132 | G    |
| 1   | A     | 134 | C    |

*Continued on next page...*

*Continued from previous page...*

| Mol | Chain | Res | Type |
|-----|-------|-----|------|
| 1   | A     | 135 | U    |
| 1   | A     | 137 | A    |
| 1   | A     | 138 | C    |
| 1   | A     | 139 | G    |
| 1   | A     | 150 | A    |
| 1   | A     | 151 | A    |
| 1   | A     | 152 | C    |
| 1   | A     | 153 | C    |
| 1   | A     | 155 | A    |
| 1   | A     | 158 | U    |
| 1   | A     | 159 | C    |
| 1   | A     | 160 | C    |
| 1   | A     | 161 | G    |
| 1   | A     | 162 | G    |
| 1   | A     | 163 | C    |
| 1   | A     | 164 | U    |
| 1   | A     | 165 | G    |
| 1   | A     | 172 | G    |
| 1   | A     | 173 | G    |
| 1   | A     | 175 | U    |
| 1   | A     | 176 | C    |
| 1   | A     | 177 | G    |
| 1   | A     | 178 | A    |
| 1   | A     | 179 | U    |
| 1   | A     | 180 | U    |
| 1   | A     | 181 | A    |
| 1   | A     | 182 | C    |
| 1   | A     | 183 | C    |
| 1   | A     | 185 | U    |
| 1   | A     | 190 | G    |
| 1   | A     | 192 | G    |
| 1   | A     | 194 | C    |
| 1   | A     | 197 | A    |
| 1   | A     | 199 | U    |
| 1   | A     | 202 | C    |
| 1   | A     | 203 | G    |
| 1   | A     | 204 | G    |
| 1   | A     | 205 | A    |
| 1   | A     | 207 | C    |
| 1   | A     | 216 | A    |
| 1   | A     | 219 | C    |
| 1   | A     | 220 | C    |

*Continued on next page...*

*Continued from previous page...*

| Mol | Chain | Res | Type |
|-----|-------|-----|------|
| 1   | A     | 224 | G    |
| 1   | A     | 225 | A    |
| 1   | A     | 226 | G    |
| 1   | A     | 227 | G    |
| 1   | A     | 228 | U    |
| 1   | A     | 230 | G    |
| 1   | A     | 233 | C    |
| 1   | A     | 234 | G    |
| 1   | A     | 235 | C    |
| 1   | A     | 238 | U    |
| 1   | A     | 239 | A    |
| 1   | A     | 240 | A    |
| 1   | A     | 241 | A    |
| 1   | A     | 243 | C    |
| 1   | A     | 245 | C    |
| 1   | A     | 246 | A    |
| 1   | A     | 250 | G    |
| 1   | A     | 254 | G    |
| 1   | A     | 255 | A    |
| 1   | A     | 256 | A    |
| 1   | A     | 257 | A    |
| 1   | A     | 266 | A    |
| 1   | A     | 267 | U    |
| 1   | A     | 269 | G    |
| 1   | A     | 270 | U    |
| 1   | A     | 271 | A    |
| 1   | A     | 272 | G    |
| 1   | A     | 273 | G    |
| 1   | A     | 274 | G    |
| 1   | A     | 276 | C    |
| 1   | A     | 278 | C    |
| 1   | A     | 291 | A    |
| 1   | A     | 292 | A    |
| 1   | A     | 293 | U    |
| 1   | A     | 296 | A    |
| 1   | A     | 300 | A    |
| 1   | A     | 302 | G    |
| 1   | A     | 304 | A    |
| 1   | A     | 306 | G    |
| 1   | A     | 309 | C    |
| 1   | A     | 312 | G    |
| 1   | A     | 314 | G    |

*Continued on next page...*

*Continued from previous page...*

| Mol | Chain | Res | Type |
|-----|-------|-----|------|
| 1   | A     | 317 | G    |
| 1   | A     | 318 | C    |
| 1   | A     | 321 | G    |
| 1   | A     | 322 | C    |
| 1   | A     | 323 | A    |
| 1   | A     | 324 | G    |
| 1   | A     | 328 | G    |
| 1   | A     | 329 | U    |
| 1   | A     | 330 | A    |
| 1   | A     | 333 | U    |
| 1   | A     | 334 | A    |
| 1   | A     | 349 | G    |
| 1   | A     | 351 | G    |
| 1   | A     | 353 | A    |
| 1   | A     | 358 | G    |
| 1   | A     | 359 | C    |
| 1   | A     | 361 | C    |
| 1   | A     | 362 | A    |
| 1   | A     | 363 | A    |
| 1   | A     | 364 | A    |
| 1   | A     | 365 | G    |
| 1   | A     | 366 | C    |
| 1   | A     | 367 | C    |
| 1   | A     | 368 | G    |
| 1   | A     | 369 | C    |
| 1   | A     | 372 | G    |
| 1   | A     | 373 | C    |
| 1   | A     | 375 | G    |
| 1   | A     | 376 | U    |
| 1   | A     | 377 | A    |
| 1   | A     | 378 | C    |
| 1   | A     | 379 | G    |
| 1   | A     | 380 | A    |
| 1   | A     | 381 | A    |
| 1   | A     | 382 | G    |
| 1   | A     | 384 | U    |
| 1   | A     | 385 | A    |
| 1   | A     | 389 | A    |
| 1   | A     | 391 | C    |
| 1   | A     | 392 | A    |
| 1   | A     | 400 | U    |
| 1   | A     | 401 | A    |

*Continued on next page...*

*Continued from previous page...*

| Mol | Chain | Res | Type |
|-----|-------|-----|------|
| 1   | A     | 402 | G    |
| 1   | A     | 403 | A    |
| 1   | A     | 407 | U    |
| 1   | A     | 408 | G    |
| 1   | A     | 410 | U    |
| 3   | C     | -29 | U    |
| 3   | C     | -28 | C    |
| 3   | C     | -26 | G    |
| 3   | C     | -25 | G    |
| 3   | C     | -24 | A    |
| 3   | C     | -18 | U    |
| 3   | C     | -17 | U    |
| 3   | C     | -16 | G    |
| 3   | C     | -9  | G    |
| 3   | C     | -8  | A    |
| 3   | C     | -7  | U    |
| 3   | C     | -6  | C    |
| 3   | C     | -5  | C    |
| 3   | C     | -4  | C    |
| 3   | C     | -3  | U    |
| 3   | C     | -2  | U    |
| 3   | C     | 1   | G    |
| 3   | C     | 7   | G    |
| 3   | C     | 8   | U    |
| 3   | C     | 9   | A    |
| 3   | C     | 10  | G    |
| 3   | C     | 11  | U    |
| 3   | C     | 12  | U    |
| 3   | C     | 13  | C    |
| 3   | C     | 14  | A    |
| 3   | C     | 16  | U    |
| 3   | C     | 17  | G    |
| 3   | C     | 18  | G    |
| 3   | C     | 19  | U    |
| 3   | C     | 20  | A    |
| 3   | C     | 21  | G    |
| 3   | C     | 23  | A    |
| 3   | C     | 24  | C    |
| 3   | C     | 29  | C    |
| 3   | C     | 33  | G    |
| 3   | C     | 37  | A    |
| 3   | C     | 43  | G    |

*Continued on next page...*

Continued from previous page...

| Mol | Chain | Res | Type |
|-----|-------|-----|------|
| 3   | C     | 44  | G    |
| 3   | C     | 45  | G    |
| 3   | C     | 46  | U    |
| 3   | C     | 47  | C    |
| 3   | C     | 48  | G    |
| 3   | C     | 52  | G    |
| 3   | C     | 58  | G    |
| 3   | C     | 59  | U    |
| 3   | C     | 60  | C    |
| 3   | C     | 70  | G    |
| 3   | C     | 72  | U    |
| 3   | C     | 74  | C    |

All (28) RNA pucker outliers are listed below:

| Mol | Chain | Res | Type |
|-----|-------|-----|------|
| 1   | A     | 50  | A    |
| 1   | A     | 52  | U    |
| 1   | A     | 67  | U    |
| 1   | A     | 75  | U    |
| 1   | A     | 122 | G    |
| 1   | A     | 126 | U    |
| 1   | A     | 137 | A    |
| 1   | A     | 158 | U    |
| 1   | A     | 176 | C    |
| 1   | A     | 182 | C    |
| 1   | A     | 201 | A    |
| 1   | A     | 232 | A    |
| 1   | A     | 240 | A    |
| 1   | A     | 271 | A    |
| 1   | A     | 272 | G    |
| 1   | A     | 292 | A    |
| 1   | A     | 363 | A    |
| 1   | A     | 365 | G    |
| 1   | A     | 377 | A    |
| 3   | C     | -26 | G    |
| 3   | C     | -18 | U    |
| 3   | C     | -4  | C    |
| 3   | C     | 7   | G    |
| 3   | C     | 18  | G    |
| 3   | C     | 19  | U    |
| 3   | C     | 46  | U    |

Continued on next page...

Continued from previous page...

| Mol | Chain | Res | Type |
|-----|-------|-----|------|
| 3   | C     | 59  | U    |
| 3   | C     | 69  | C    |

#### 5.4 Non-standard residues in protein, DNA, RNA chains [i](#)

There are no non-standard protein/DNA/RNA residues in this entry.

#### 5.5 Carbohydrates [i](#)

There are no oligosaccharides in this entry.

#### 5.6 Ligand geometry [i](#)

Of 27 ligands modelled in this entry, 27 are monoatomic - leaving 0 for Mogul analysis.

There are no bond length outliers.

There are no bond angle outliers.

There are no chirality outliers.

There are no torsion outliers.

There are no ring outliers.

No monomer is involved in short contacts.

#### 5.7 Other polymers [i](#)

There are no such residues in this entry.

#### 5.8 Polymer linkage issues [i](#)

The following chains have linkage breaks:

| Mol | Chain | Number of breaks |
|-----|-------|------------------|
| 3   | C     | 1                |

All chain breaks are listed below:

| Model | Chain | Residue-1 | Atom-1 | Residue-2 | Atom-2 | Distance (Å) |
|-------|-------|-----------|--------|-----------|--------|--------------|
| 1     | C     | 11:U      | O3'    | 12:U      | P      | 1.98         |

## 6 Map visualisation [i](#)

This section contains visualisations of the EMDB entry EMD-70947. These allow visual inspection of the internal detail of the map and identification of artifacts.

Images derived from a raw map, generated by summing the deposited half-maps, are presented below the corresponding image components of the primary map to allow further visual inspection and comparison with those of the primary map.

### 6.1 Orthogonal projections [i](#)

#### 6.1.1 Primary map

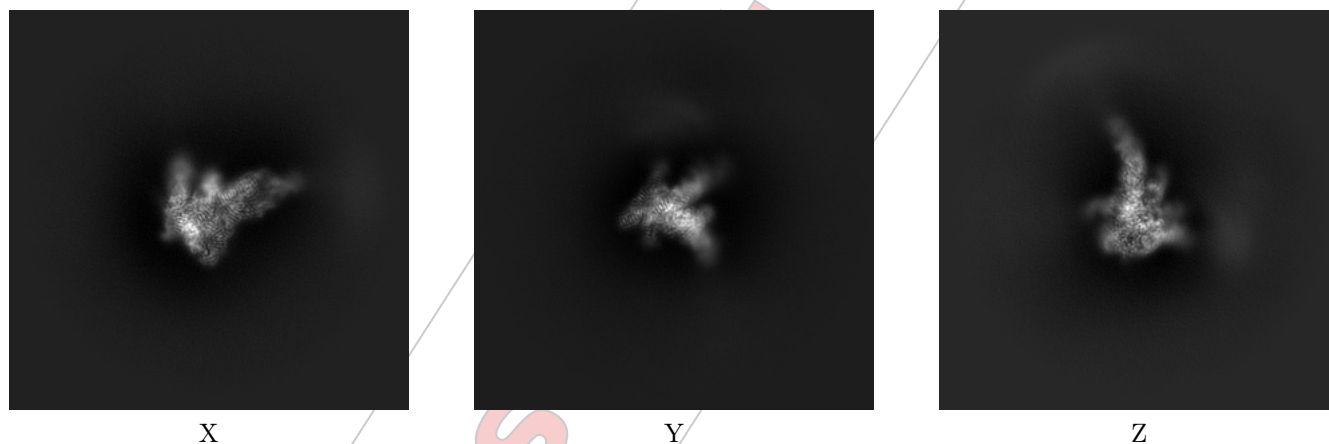

#### 6.1.2 Raw map

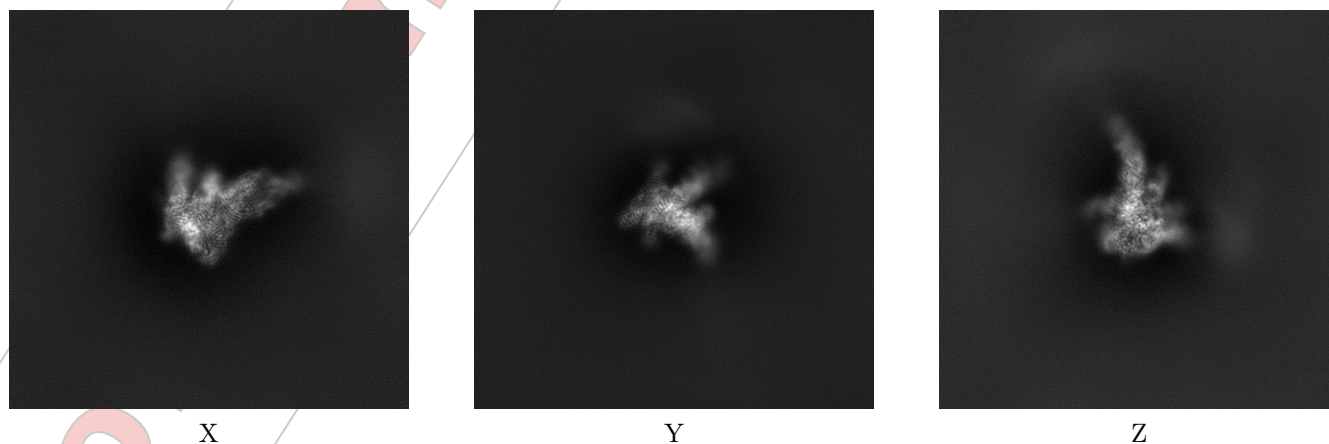

The images above show the map projected in three orthogonal directions.

## 6.2 Central slices [i](#)

### 6.2.1 Primary map

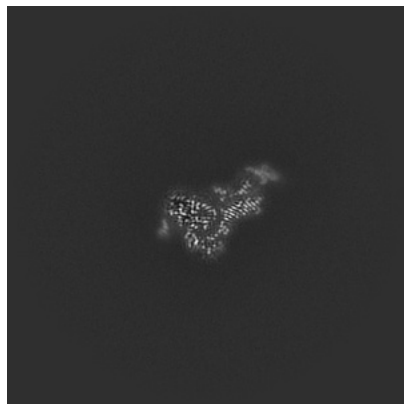

X Index: 200

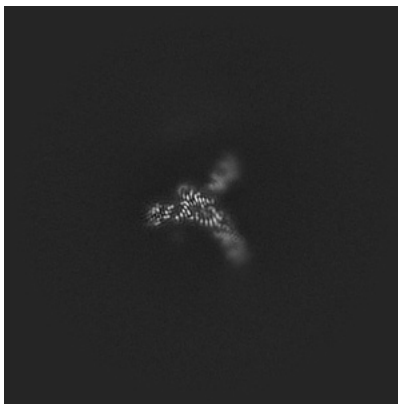

Y Index: 200

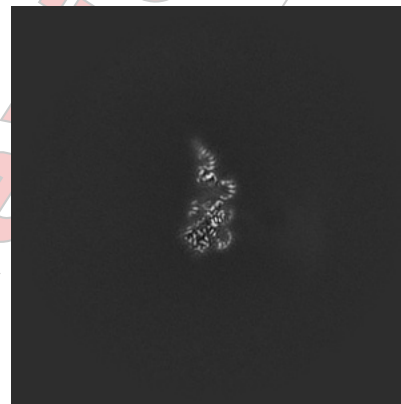

Z Index: 200

### 6.2.2 Raw map

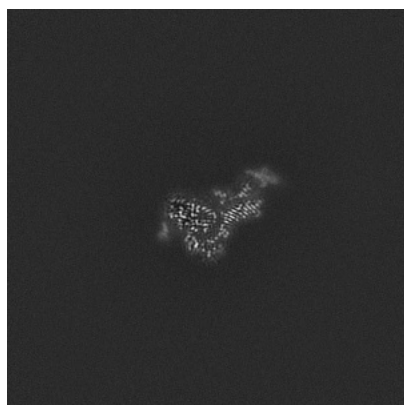

X Index: 200

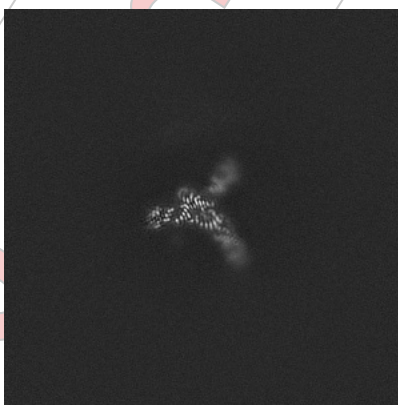

Y Index: 200

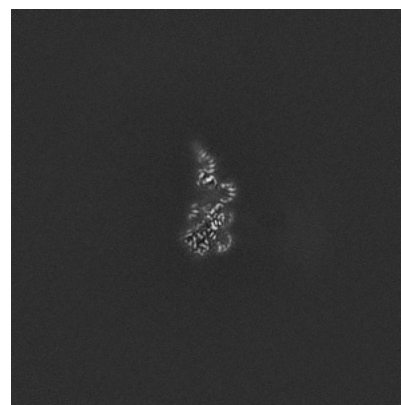

Z Index: 200

The images above show central slices of the map in three orthogonal directions.

## 6.3 Largest variance slices [i](#)

### 6.3.1 Primary map

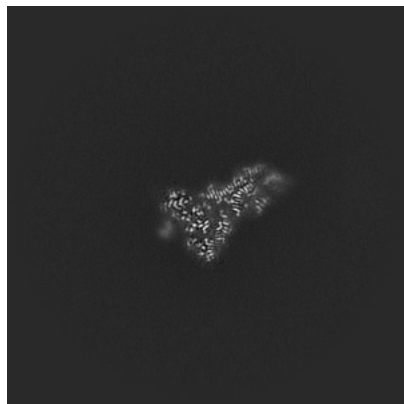

X Index: 194

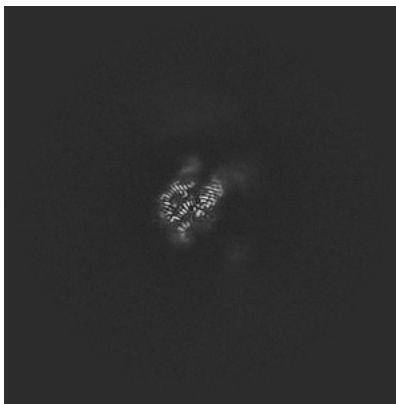

Y Index: 186

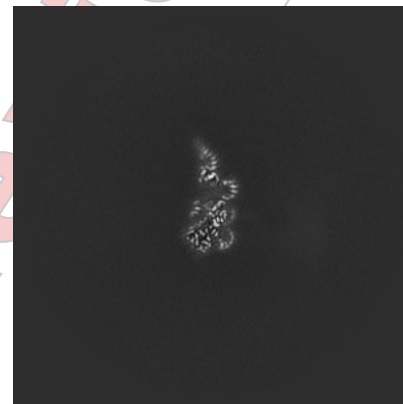

Z Index: 200

### 6.3.2 Raw map

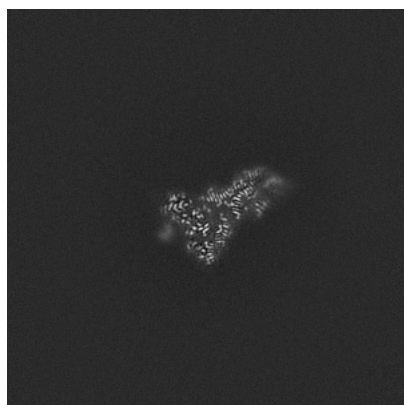

X Index: 194

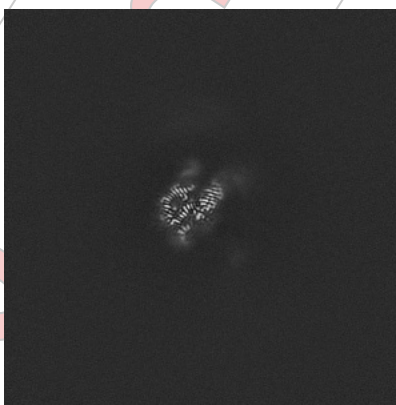

Y Index: 186

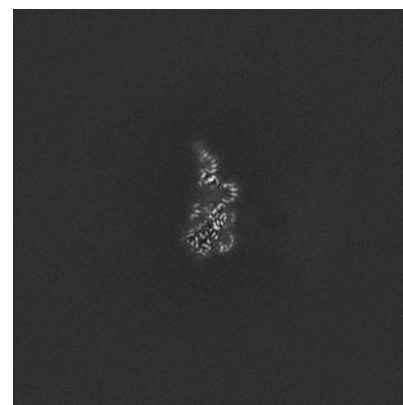

Z Index: 200

The images above show the largest variance slices of the map in three orthogonal directions.

## 6.4 Orthogonal standard-deviation projections (False-color) [i](#)

### 6.4.1 Primary map

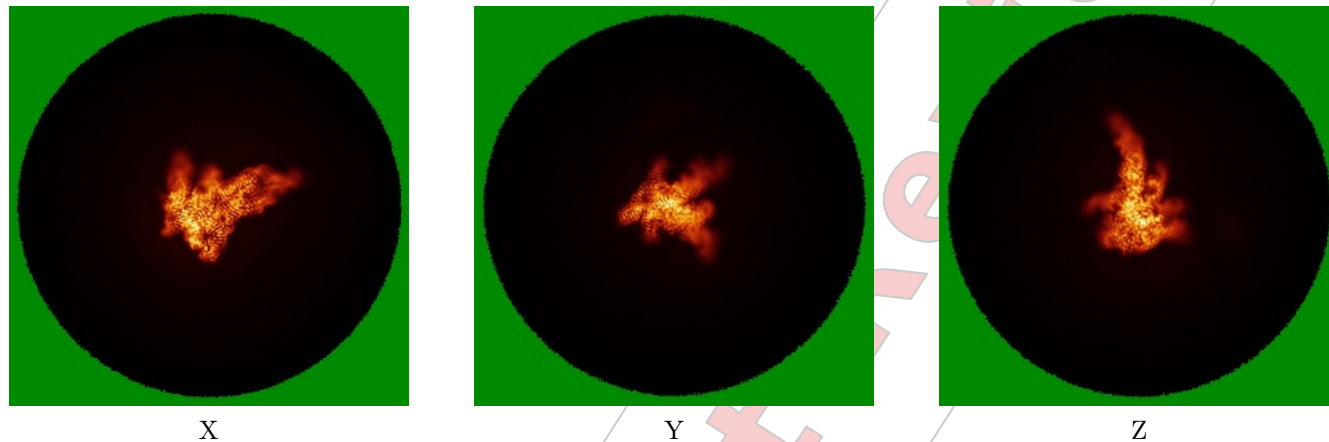

### 6.4.2 Raw map

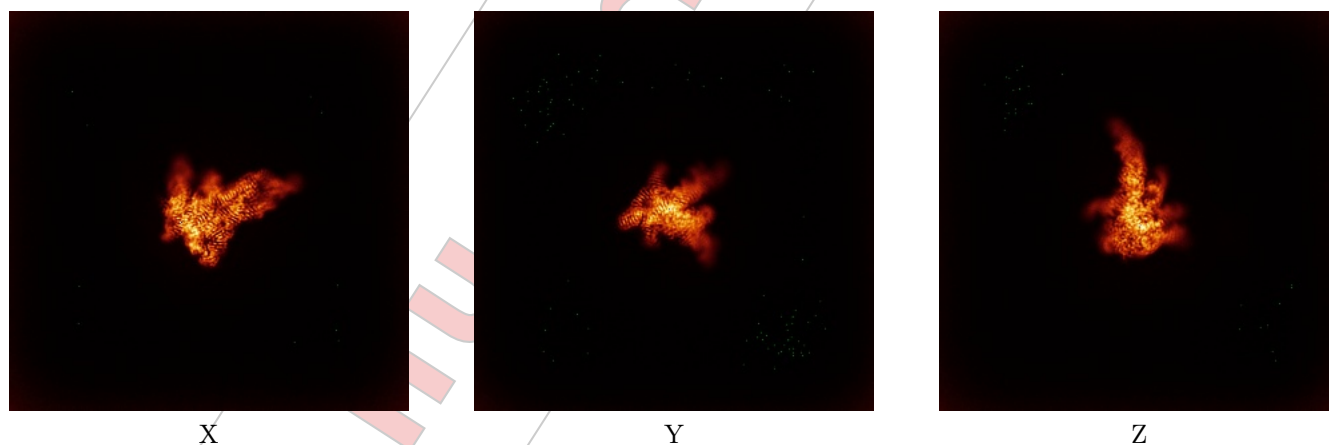

The images above show the map standard deviation projections with false color in three orthogonal directions. Minimum values are shown in green, max in blue, and dark to light orange shades represent small to large values respectively.

## 6.5 Orthogonal surface views [i](#)

### 6.5.1 Primary map

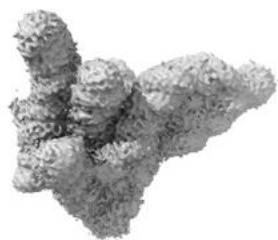

X

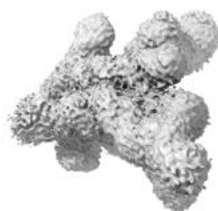

Y

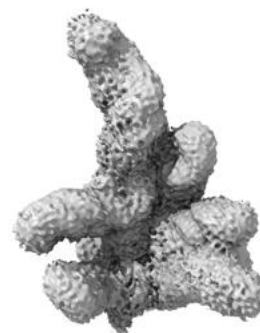

Z

The images above show the 3D surface view of the map at the recommended contour level 0.02. These images, in conjunction with the slice images, may facilitate assessment of whether an appropriate contour level has been provided.

### 6.5.2 Raw map

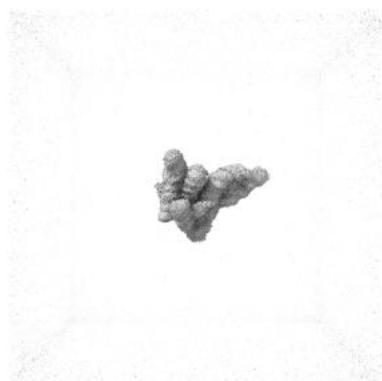

X

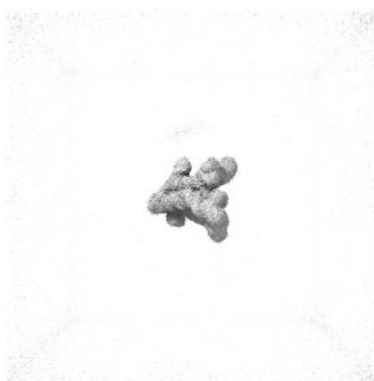

Y

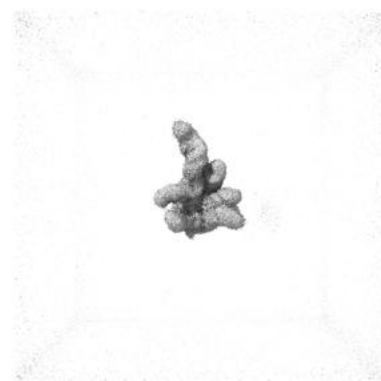

Z

These images show the 3D surface of the raw map. The raw map's contour level was selected so that its surface encloses the same volume as the primary map does at its recommended contour level.

## 6.6 Mask visualisation [i](#)

This section was not generated. No masks/segmentation were deposited.

## 7 Map analysis [i](#)

This section contains the results of statistical analysis of the map.

### 7.1 Map-value distribution [i](#)

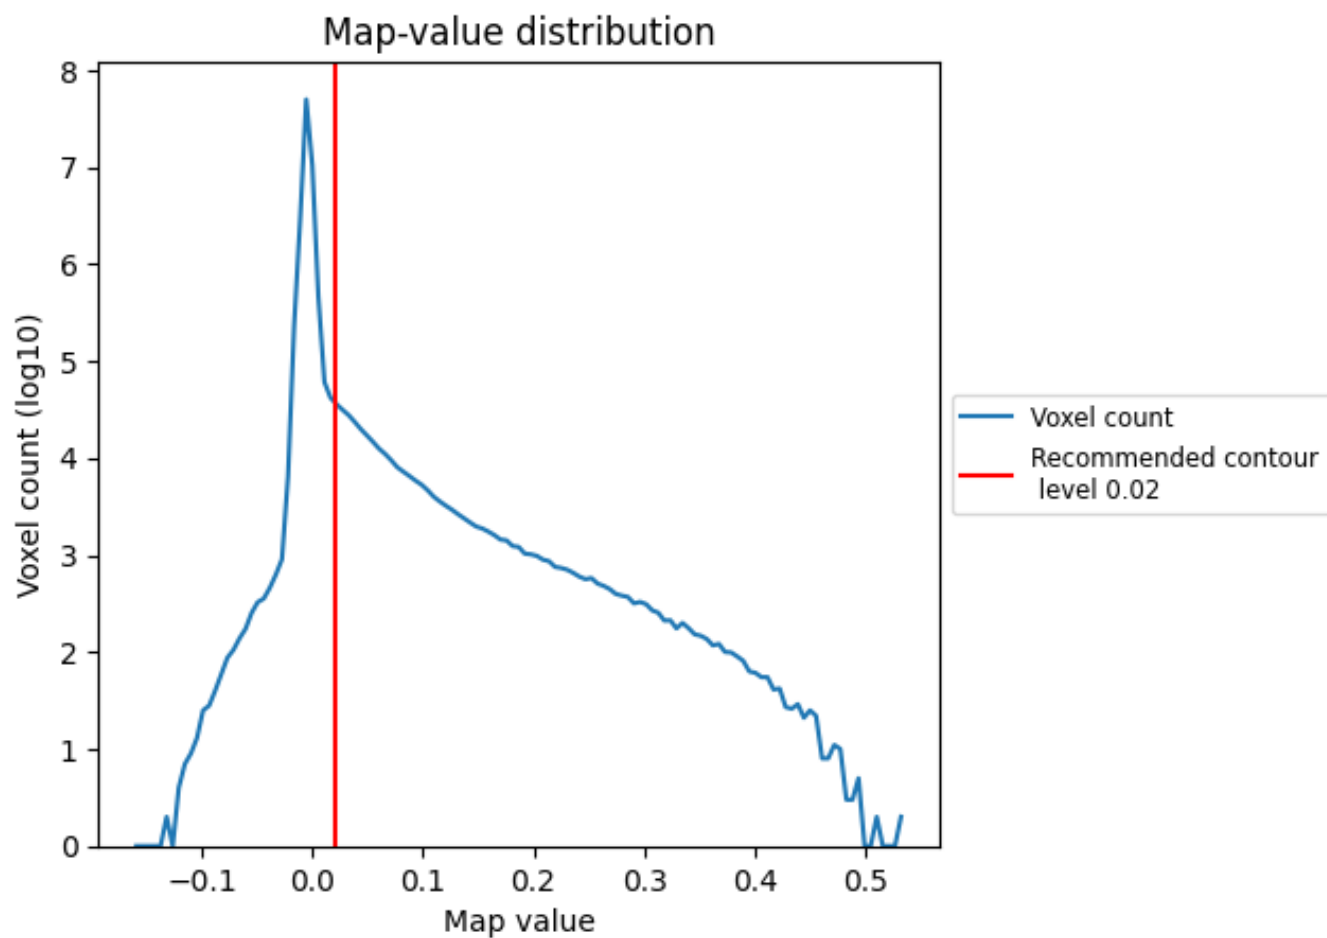

The map-value distribution is plotted in 128 intervals along the x-axis. The y-axis is logarithmic. A spike in this graph at zero usually indicates that the volume has been masked.

## 7.2 Volume estimate [\(i\)](#)

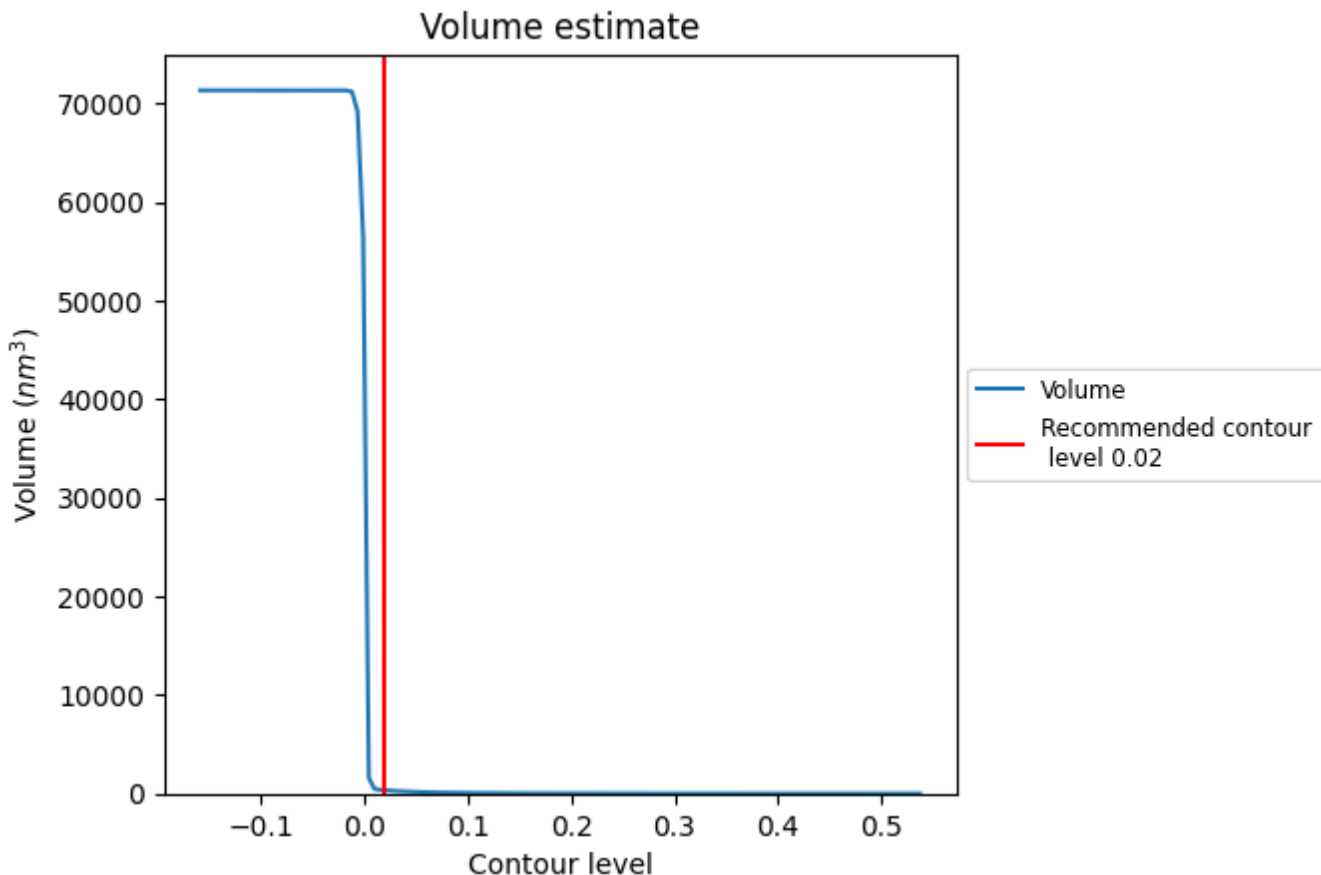

The volume at the recommended contour level is 340 nm<sup>3</sup>; this corresponds to an approximate mass of 307 kDa.

The volume estimate graph shows how the enclosed volume varies with the contour level. The recommended contour level is shown as a vertical line and the intersection between the line and the curve gives the volume of the enclosed surface at the given level.

7.3 Rotationally averaged power spectrum 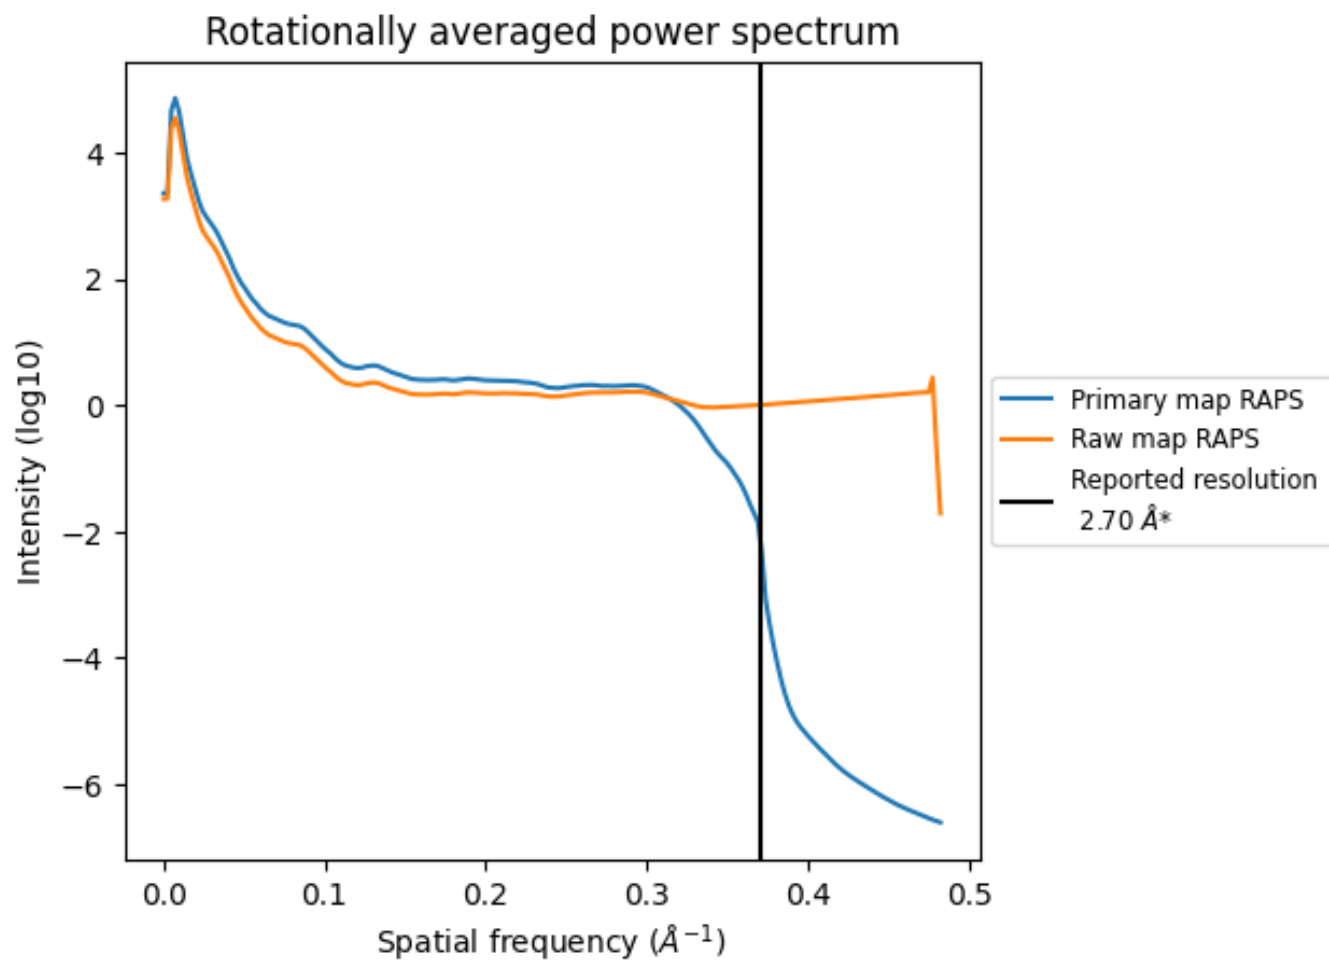

\*Reported resolution corresponds to spatial frequency of 0.370 Å<sup>-1</sup>

## 8 Fourier-Shell correlation [i](#)

Fourier-Shell Correlation (FSC) is the most commonly used method to estimate the resolution of single-particle and subtomogram-averaged maps. The shape of the curve depends on the imposed symmetry, mask and whether or not the two 3D reconstructions used were processed from a common reference. The reported resolution is shown as a black line. A curve is displayed for the half-bit criterion in addition to lines showing the 0.143 gold standard cut-off and 0.5 cut-off.

### 8.1 FSC [i](#)

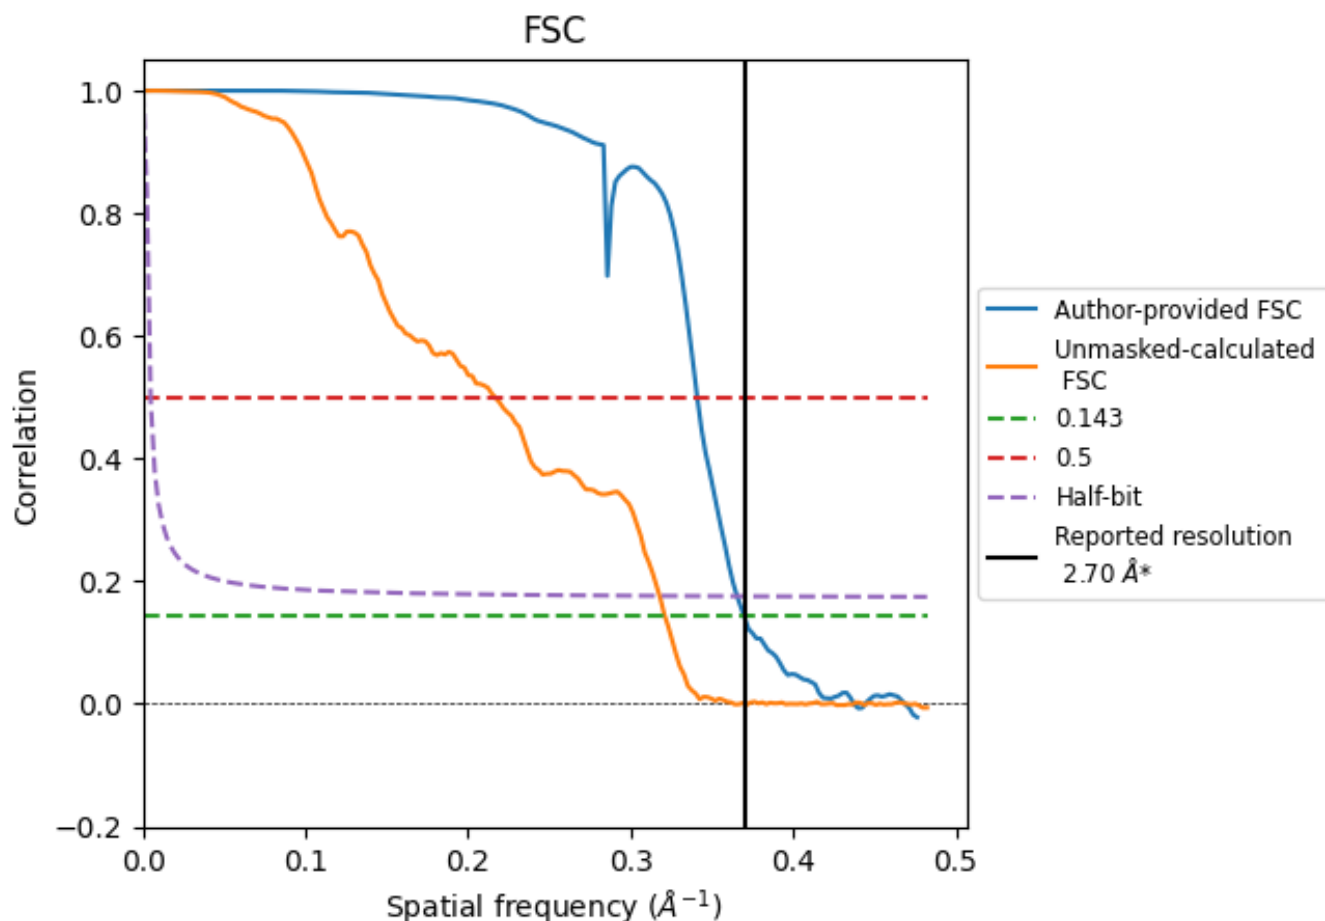

\*Reported resolution corresponds to spatial frequency of 0.370 Å<sup>-1</sup>

## 8.2 Resolution estimates [\(i\)](#)

| Resolution estimate (Å)   | Estimation criterion (FSC cut-off) |      |          |
|---------------------------|------------------------------------|------|----------|
|                           | 0.143                              | 0.5  | Half-bit |
| Reported by author        | 2.70                               | -    | -        |
| Author-provided FSC curve | 2.70                               | 2.93 | 2.74     |
| Unmasked-calculated*      | 3.12                               | 4.62 | 3.15     |

\*Resolution estimate based on FSC curve calculated by comparison of deposited half-maps. The value from deposited half-maps intersecting FSC 0.143 CUT-OFF 3.12 differs from the reported value 2.7 by more than 10 %

## 9 Map-model fit [i](#)

This section contains information regarding the fit between EMDB map EMD-70947 and PDB model 9OWX. Per-residue inclusion information can be found in section 3 on page 4.

### 9.1 Map-model overlay [i](#)

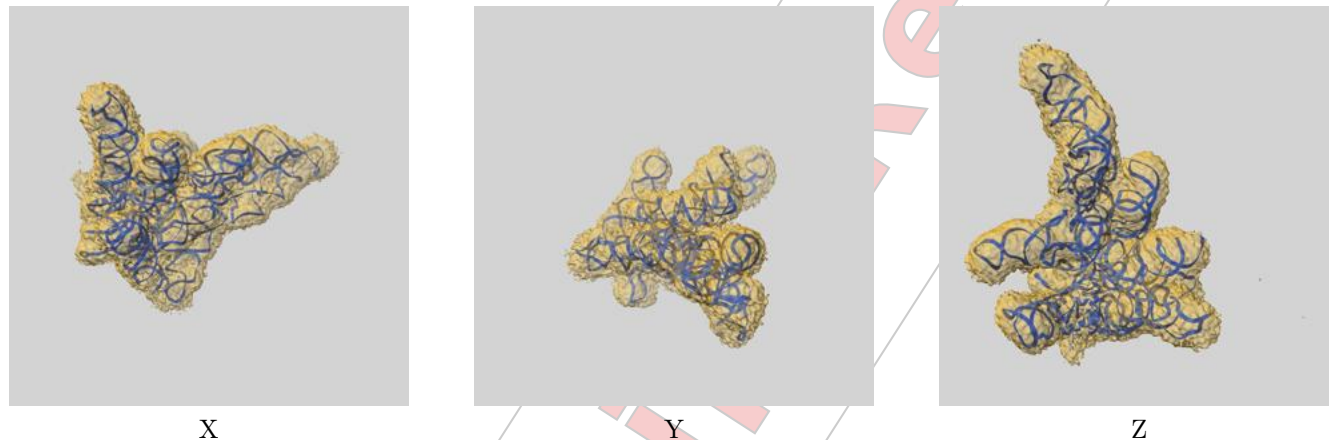

The images above show the 3D surface view of the map at the recommended contour level 0.02 at 50% transparency in yellow overlaid with a ribbon representation of the model coloured in blue. These images allow for the visual assessment of the quality of fit between the atomic model and the map.

## 9.2 Q-score mapped to coordinate model [\(i\)](#)

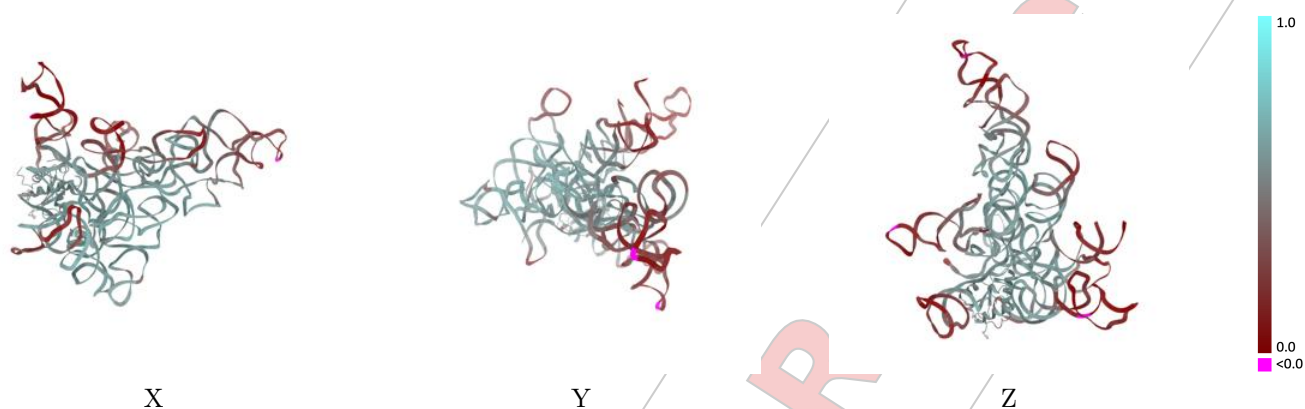

The images above show the model with each residue coloured according to its Q-score. This shows their resolvability in the map with higher Q-score values reflecting better resolvability. Please note: Q-score is calculating the resolvability of atoms, and thus high values are only expected at resolutions at which atoms can be resolved. Low Q-score values may therefore be expected for many entries.

## 9.3 Atom inclusion mapped to coordinate model [\(i\)](#)

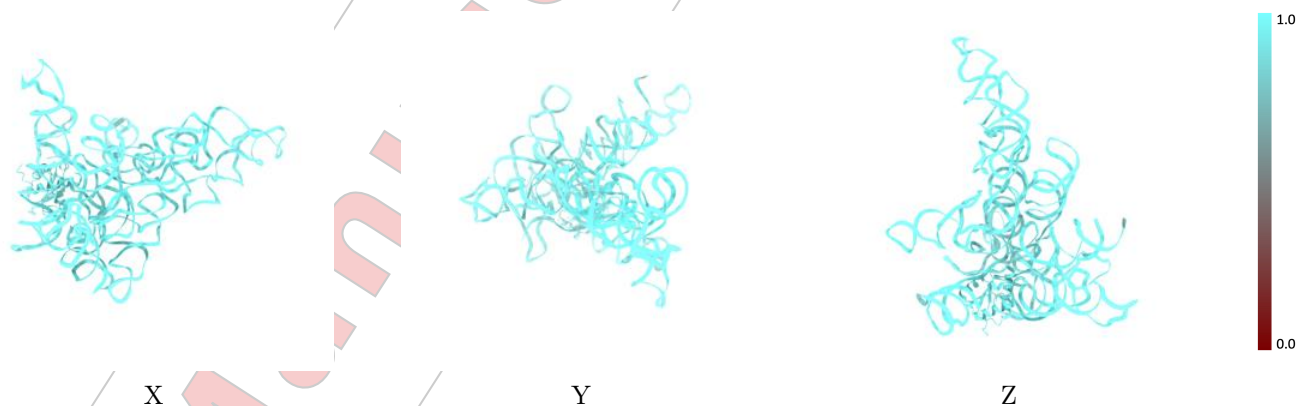

The images above show the model with each residue coloured according to its atom inclusion. This shows to what extent they are inside the map at the recommended contour level (0.02).

## 9.4 Atom inclusion [i](#)

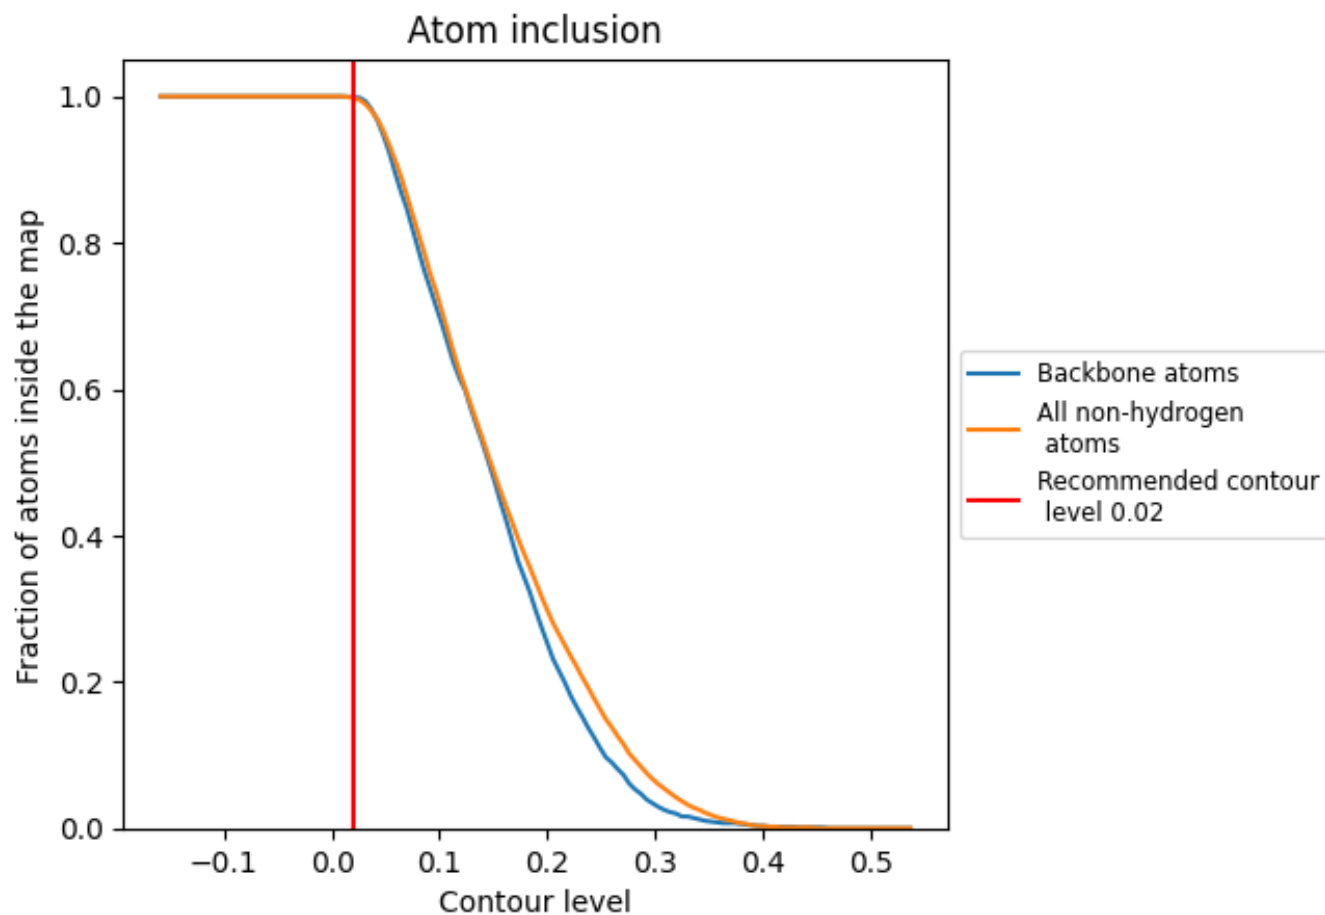

At the recommended contour level, 100% of all backbone atoms, 100% of all non-hydrogen atoms, are inside the map.

## 9.5 Map-model fit summary [i](#)

The table lists the average atom inclusion at the recommended contour level (0.02) and Q-score for the entire model and for each chain.

| Chain | Atom inclusion                                                                           | Q-score                                                                                  |
|-------|------------------------------------------------------------------------------------------|------------------------------------------------------------------------------------------|
| All   |  0.9980 |  0.4660 |
| A     |  0.9990 |  0.4690 |
| B     |  0.9980 |  0.5510 |
| C     |  0.9950 |  0.4210 |





## Full wwPDB EM Validation Report i

Jun 4, 2025 – 04:14 PM EDT

PDB ID : 9OWY / pdb\_00009owy  
EMDB ID : EMD-70948  
Title : Structure of Geobacillus stearothermophilus RNase P holoenzyme in complex with the precursor tRNA with loop-back 5' leader (sub-conformation 2 of tRNA anticodon arm tilted)  
Deposited on : 2025-06-02  
Resolution : 2.69 Å (reported)  
Based on initial model : 2A64

**This wwPDB validation report is for manuscript review**

This is a Full wwPDB EM Validation Report.

This report is produced by the wwPDB biocuration pipeline after annotation of the structure.

We welcome your comments at [validation@mail.wwpdb.org](mailto:validation@mail.wwpdb.org)

A user guide is available at

<https://www.wwpdb.org/validation/2017/EMValidationReportHelp>

with specific help available everywhere you see the i symbol.

The types of validation reports are described at

<http://www.wwpdb.org/validation/2017/FAQs#types>.

---

The following versions of software and data (see [references](#) i) were used in the production of this report:

EMDB validation analysis : 0.0.1.dev118  
MolProbity : 4-5-2 with Phenix2.0rc1  
Percentile statistics : 20231227.v01 (using entries in the PDB archive December 27th 2023)  
MapQ : 1.9.13  
Ideal geometry (proteins) : Engh & Huber (2001)

# 1 Overall quality at a glance i

The following experimental techniques were used to determine the structure:  
*ELECTRON MICROSCOPY*

The reported resolution of this entry is 2.69 Å.

Percentile scores (ranging between 0-100) for global validation metrics of the entry are shown in the following graphic. The table shows the number of entries on which the scores are based.

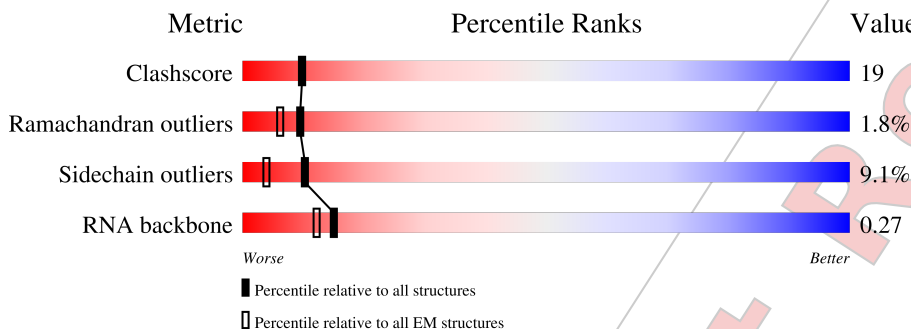

| Metric                | Whole archive (#Entries) | EM structures (#Entries) |
|-----------------------|--------------------------|--------------------------|
| Clashscore            | 210492                   | 15764                    |
| Ramachandran outliers | 207382                   | 16835                    |
| Sidechain outliers    | 206894                   | 16415                    |
| RNA backbone          | 6643                     | 2191                     |

The table below summarises the geometric issues observed across the polymeric chains and their fit to the map. The red, orange, yellow and green segments of the bar indicate the fraction of residues that contain outliers for  $\geq 3$ , 2, 1 and 0 types of geometric quality criteria respectively. A grey segment represents the fraction of residues that are not modelled. The numeric value for each fraction is indicated below the corresponding segment, with a dot representing fractions  $\leq 5\%$ . The upper red bar (where present) indicates the fraction of residues that have poor fit to the EM map (all-atom inclusion  $< 40\%$ ). The numeric value is given above the bar.

| Mol | Chain | Length | Quality of chain |
|-----|-------|--------|------------------|
| 1   | A     | 417    | 28% 46% 25%      |
| 2   | B     | 116    | 72% 22% . .      |
| 3   | C     | 111    | 28% 47% 22% . .  |

Ideal geometry (DNA, RNA) : Parkinson et al. (1996)  
Validation Pipeline (wwPDB-VP) : 2.43.1

## 2 Entry composition i

There are 4 unique types of molecules in this entry. The entry contains 12231 atoms, of which 0 are hydrogens and 0 are deuteriums.

In the tables below, the AltConf column contains the number of residues with at least one atom in alternate conformation and the Trace column contains the number of residues modelled with at most 2 atoms.

- Molecule 1 is a RNA chain called RNase P RNA (417-MER).

| Mol | Chain | Residues | Atoms |      |      |      |     | AltConf | Trace |
|-----|-------|----------|-------|------|------|------|-----|---------|-------|
|     |       |          | Total | C    | N    | O    | P   |         |       |
| 1   | A     | 417      | 8962  | 3996 | 1660 | 2889 | 417 | 0       | 0     |

- Molecule 2 is a protein called Ribonuclease P protein component.

| Mol | Chain | Residues | Atoms |     |     |     |   | AltConf | Trace |
|-----|-------|----------|-------|-----|-----|-----|---|---------|-------|
|     |       |          | Total | C   | N   | O   | S |         |       |
| 2   | B     | 116      | 947   | 608 | 174 | 162 | 3 | 0       | 0     |

There are 2 discrepancies between the modelled and reference sequences:

| Chain | Residue | Modelled | Actual | Comment        | Reference      |
|-------|---------|----------|--------|----------------|----------------|
| B     | 0       | GLY      | -      | expression tag | UNP A0A150N245 |
| B     | 64      | ILE      | VAL    | conflict       | UNP A0A150N245 |

- Molecule 3 is a RNA chain called precursor tRNA (108-MER).

| Mol | Chain | Residues | Atoms |      |     |     |     | AltConf | Trace |
|-----|-------|----------|-------|------|-----|-----|-----|---------|-------|
|     |       |          | Total | C    | N   | O   | P   |         |       |
| 3   | C     | 108      | 2293  | 1022 | 397 | 766 | 108 | 0       | 0     |

- Molecule 4 is CALCIUM ION (CCD ID: CA) (formula: Ca) (labeled as "Ligand of Interest" by depositor).

| Mol | Chain | Residues | Atoms |    | AltConf |
|-----|-------|----------|-------|----|---------|
| 4   | A     | 27       | Total | Ca | 0       |
|     |       |          | 27    | 27 |         |
| 4   | C     | 2        | Total | Ca | 0       |
|     |       |          | 2     | 2  |         |

### 3 Residue-property plots

These plots are drawn for all protein, RNA, DNA and oligosaccharide chains in the entry. The first graphic for a chain summarises the proportions of the various outlier classes displayed in the second graphic. The second graphic shows the sequence view annotated by issues in geometry and atom inclusion in map density. Residues are color-coded according to the number of geometric quality criteria for which they contain at least one outlier: green = 0, yellow = 1, orange = 2 and red = 3 or more. A red diamond above a residue indicates a poor fit to the EM map for this residue (all-atom inclusion < 40%). Stretches of 2 or more consecutive residues without any outlier are shown as a green connector. Residues present in the sample, but not in the model, are shown in grey.

- Molecule 1: RNase P RNA (417-MER)

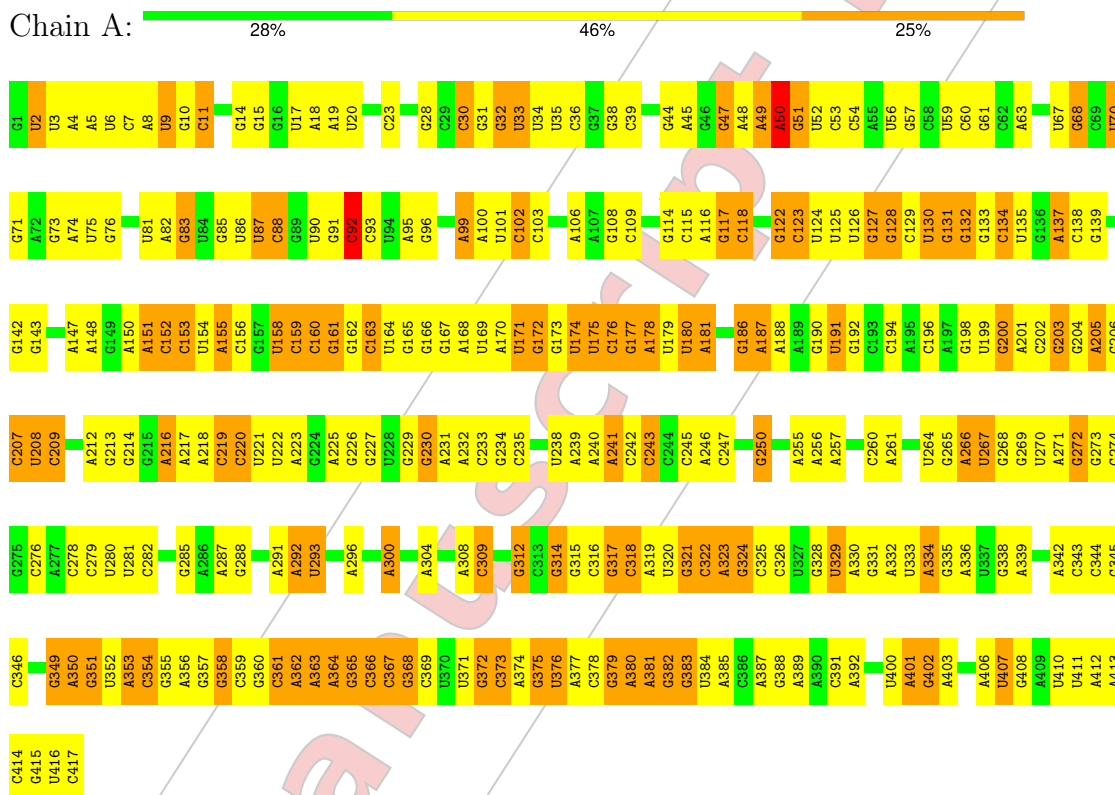

- Molecule 2: Ribonuclease P protein component

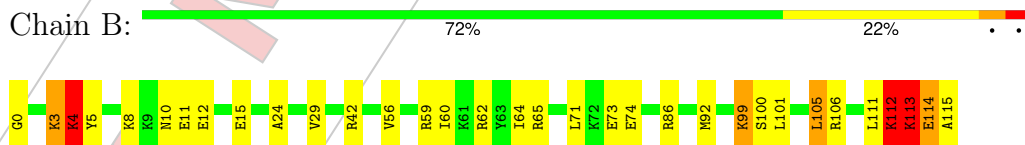

- Molecule 3: precursor tRNA (108-MER)

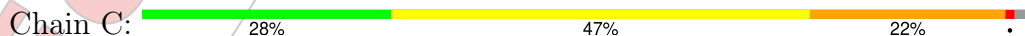

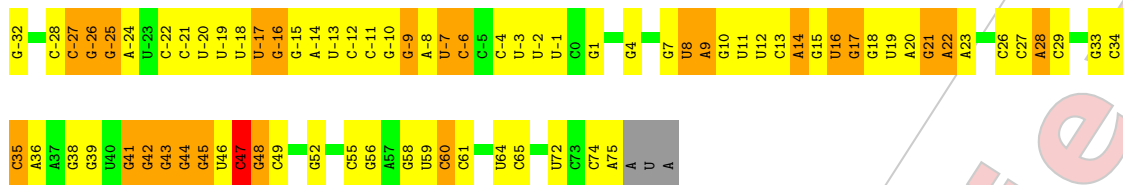

For Manuscript Review

## 4 Experimental information i

| Property                             | Value                                   | Source    |
|--------------------------------------|-----------------------------------------|-----------|
| EM reconstruction method             | SINGLE PARTICLE                         | Depositor |
| Imposed symmetry                     | POINT, Not provided                     |           |
| Number of particles used             | 483540                                  | Depositor |
| Resolution determination method      | FSC 0.143 CUT-OFF                       | Depositor |
| CTF correction method                | PHASE FLIPPING AND AMPLITUDE CORRECTION | Depositor |
| Microscope                           | FEI TALOS ARCTICA                       | Depositor |
| Voltage (kV)                         | 200                                     | Depositor |
| Electron dose ( $e^-/\text{\AA}^2$ ) | 57                                      | Depositor |
| Minimum defocus (nm)                 | 500                                     | Depositor |
| Maximum defocus (nm)                 | 1500                                    | Depositor |
| Magnification                        | Not provided                            |           |
| Image detector                       | GATAN K3 BIOQUANTUM (6k x 4k)           | Depositor |
| Maximum map value                    | 0.532                                   | Depositor |
| Minimum map value                    | -0.167                                  | Depositor |
| Average map value                    | -0.000                                  | Depositor |
| Map value standard deviation         | 0.007                                   | Depositor |
| Recommended contour level            | 0.02                                    | Depositor |
| Map size (Å)                         | 414.72, 414.72, 414.72                  | wwPDB     |
| Map dimensions                       | 400, 400, 400                           | wwPDB     |
| Map angles (°)                       | 90.0, 90.0, 90.0                        | wwPDB     |
| Pixel spacing (Å)                    | 1.0368, 1.0368, 1.0368                  | Depositor |

## 5 Model quality [i](#)

### 5.1 Standard geometry [i](#)

Bond lengths and bond angles in the following residue types are not validated in this section: CA

The Z score for a bond length (or angle) is the number of standard deviations the observed value is removed from the expected value. A bond length (or angle) with  $|Z| > 5$  is considered an outlier worth inspection. RMSZ is the root-mean-square of all Z scores of the bond lengths (or angles).

| Mol | Chain | Bond lengths |                | Bond angles |                |
|-----|-------|--------------|----------------|-------------|----------------|
|     |       | RMSZ         | # Z  >5        | RMSZ        | # Z  >5        |
| 1   | A     | 0.54         | 0/10038        | 0.89        | 4/15661 (0.0%) |
| 2   | B     | 0.57         | 1/962 (0.1%)   | 0.75        | 1/1281 (0.1%)  |
| 3   | C     | 0.59         | 0/2558         | 0.90        | 1/3984 (0.0%)  |
| All | All   | 0.55         | 1/13558 (0.0%) | 0.88        | 6/20926 (0.0%) |

Chiral center outliers are detected by calculating the chiral volume of a chiral center and verifying if the center is modelled as a planar moiety or with the opposite hand. A planarity outlier is detected by checking planarity of atoms in a peptide group, atoms in a mainchain group or atoms of a sidechain that are expected to be planar.

| Mol | Chain | #Chirality outliers | #Planarity outliers |
|-----|-------|---------------------|---------------------|
| 2   | B     | 0                   | 1                   |

All (1) bond length outliers are listed below:

| Mol | Chain | Res | Type | Atoms | Z     | Observed(Å) | Ideal(Å) |
|-----|-------|-----|------|-------|-------|-------------|----------|
| 2   | B     | 100 | SER  | CA-CB | -6.88 | 1.42        | 1.53     |

All (6) bond angle outliers are listed below:

| Mol | Chain | Res | Type | Atoms       | Z     | Observed(°) | Ideal(°) |
|-----|-------|-----|------|-------------|-------|-------------|----------|
| 1   | A     | 92  | C    | O3'-P-O5'   | -6.47 | 94.29       | 104.00   |
| 1   | A     | 200 | G    | O3'-P-O5'   | -5.49 | 95.76       | 104.00   |
| 1   | A     | 50  | A    | O3'-P-O5'   | -5.43 | 95.85       | 104.00   |
| 1   | A     | 191 | U    | O3'-P-O5'   | -5.43 | 95.86       | 104.00   |
| 3   | C     | 47  | C    | C1'-C2'-O2' | -5.43 | 103.66      | 111.80   |
| 2   | B     | 4   | LYS  | N-CA-C      | -5.04 | 105.98      | 111.82   |

There are no chirality outliers.

All (1) planarity outliers are listed below:

| Mol | Chain | Res | Type | Group     |
|-----|-------|-----|------|-----------|
| 2   | B     | 59  | ARG  | Sidechain |

## 5.2 Too-close contacts [\(i\)](#)

In the following table, the Non-H and H(model) columns list the number of non-hydrogen atoms and hydrogen atoms in the chain respectively. The H(added) column lists the number of hydrogen atoms added and optimized by MolProbity. The Clashes column lists the number of clashes within the asymmetric unit, whereas Symm-Clashes lists symmetry-related clashes.

| Mol | Chain | Non-H | H(model) | H(added) | Clashes | Symm-Clashes |
|-----|-------|-------|----------|----------|---------|--------------|
| 1   | A     | 8962  | 0        | 4510     | 249     | 0            |
| 2   | B     | 947   | 0        | 1008     | 28      | 0            |
| 3   | C     | 2293  | 0        | 1162     | 56      | 0            |
| 4   | A     | 27    | 0        | 0        | 1       | 0            |
| 4   | C     | 2     | 0        | 0        | 0       | 0            |
| All | All   | 12231 | 0        | 6680     | 323     | 0            |

The all-atom clashscore is defined as the number of clashes found per 1000 atoms (including hydrogen atoms). The all-atom clashscore for this structure is 19.

All (323) close contacts within the same asymmetric unit are listed below, sorted by their clash magnitude.

| Atom-1           | Atom-2         | Interatomic distance (Å) | Clash overlap (Å) |
|------------------|----------------|--------------------------|-------------------|
| 1:A:159:C:H6     | 1:A:159:C:OP2  | 1.10                     | 1.26              |
| 3:C:43:G:H3'     | 3:C:44:G:H3'   | 1.26                     | 1.16              |
| 1:A:159:C:OP2    | 1:A:159:C:C6   | 2.02                     | 1.12              |
| 1:A:364:A:C4     | 1:A:365:G:H1'  | 1.96                     | 0.99              |
| 2:B:105:LEU:HB3  | 2:B:111:LEU:HG | 1.51                     | 0.93              |
| 1:A:371:U:H5''   | 1:A:372:G:H5'  | 1.54                     | 0.90              |
| 1:A:363:A:H2'    | 1:A:364:A:C4   | 2.13                     | 0.83              |
| 1:A:158:U:H2'    | 1:A:159:C:C6   | 2.14                     | 0.83              |
| 2:B:106:ARG:HH11 | 2:B:113:LYS:HA | 1.44                     | 0.83              |
| 1:A:367:C:H2'    | 1:A:368:G:C8   | 2.15                     | 0.81              |
| 1:A:350:A:H3'    | 1:A:351:G:H8   | 1.45                     | 0.81              |
| 1:A:315:G:H2'    | 1:A:316:C:C6   | 2.16                     | 0.80              |
| 1:A:314:G:H1     | 1:A:323:A:H61  | 1.30                     | 0.80              |
| 1:A:50:A:C8      | 1:A:50:A:H5''  | 2.18                     | 0.78              |
| 1:A:127:G:H2'    | 1:A:128:G:H4'  | 1.66                     | 0.78              |
| 1:A:378:C:H3'    | 1:A:379:G:C8   | 2.19                     | 0.76              |
| 1:A:45:A:H62     | 2:B:62:ARG:NH2 | 1.84                     | 0.75              |
| 1:A:160:C:H1'    | 1:A:167:G:H22  | 1.50                     | 0.74              |

*Continued on next page...*

*Continued from previous page...*

| Atom-1          | Atom-2           | Interatomic distance (Å) | Clash overlap (Å) |
|-----------------|------------------|--------------------------|-------------------|
| 3:C:41:G:H3'    | 3:C:42:G:H8      | 1.52                     | 0.73              |
| 3:C:43:G:H3'    | 3:C:44:G:C3'     | 2.14                     | 0.73              |
| 1:A:45:A:C2     | 1:A:388:G:H2'    | 2.24                     | 0.73              |
| 1:A:47:G:H1     | 1:A:385:A:H62    | 1.39                     | 0.70              |
| 1:A:349:G:H22   | 1:A:379:G:H1'    | 1.55                     | 0.70              |
| 1:A:363:A:C8    | 1:A:363:A:H5''   | 2.28                     | 0.68              |
| 1:A:364:A:C5    | 1:A:365:G:H1'    | 2.27                     | 0.68              |
| 3:C:21:G:H2'    | 3:C:22:A:H5''    | 1.75                     | 0.68              |
| 2:B:0:GLY:HA3   | 2:B:65:ARG:HB3   | 1.75                     | 0.68              |
| 1:A:9:U:H2'     | 1:A:10:G:H8      | 1.57                     | 0.67              |
| 1:A:158:U:H6    | 1:A:158:U:O5'    | 1.76                     | 0.67              |
| 1:A:352:U:H2'   | 1:A:353:A:C8     | 2.29                     | 0.67              |
| 1:A:364:A:H3'   | 1:A:365:G:O4'    | 1.95                     | 0.67              |
| 1:A:174:U:H2'   | 1:A:175:U:C6     | 2.31                     | 0.66              |
| 1:A:378:C:H3'   | 1:A:379:G:H8     | 1.59                     | 0.66              |
| 3:C:-26:G:H2'   | 3:C:-25:G:H5'    | 1.78                     | 0.65              |
| 3:C:27:C:H2'    | 3:C:28:A:C8      | 2.30                     | 0.65              |
| 1:A:308:A:N1    | 1:A:329:U:H5     | 1.95                     | 0.65              |
| 1:A:363:A:O3'   | 1:A:364:A:O4'    | 2.15                     | 0.65              |
| 1:A:102:C:H2'   | 1:A:103:C:O4'    | 1.97                     | 0.65              |
| 2:B:112:LYS:O   | 2:B:114:GLU:N    | 2.31                     | 0.64              |
| 1:A:374:A:H2'   | 1:A:375:G:C8     | 2.32                     | 0.64              |
| 1:A:18:A:H2'    | 1:A:19:A:H8      | 1.62                     | 0.64              |
| 1:A:272:G:H5''  | 1:A:272:G:H8     | 1.62                     | 0.64              |
| 1:A:203:G:C5    | 1:A:205:A:H1'    | 2.32                     | 0.63              |
| 3:C:41:G:H3'    | 3:C:42:G:C8      | 2.33                     | 0.63              |
| 1:A:350:A:H3'   | 1:A:351:G:C8     | 2.30                     | 0.62              |
| 2:B:56:VAL:O    | 2:B:60:ILE:HG13  | 2.00                     | 0.62              |
| 1:A:316:C:H2'   | 1:A:317:G:C8     | 2.35                     | 0.61              |
| 1:A:176:C:H2'   | 1:A:177:G:C8     | 2.35                     | 0.61              |
| 1:A:308:A:N1    | 1:A:329:U:C5     | 2.69                     | 0.61              |
| 1:A:196:C:OP2   | 4:A:525:CA:CA    | 1.77                     | 0.61              |
| 1:A:3:U:H2'     | 1:A:4:A:C8       | 2.36                     | 0.61              |
| 1:A:167:G:H2'   | 1:A:168:A:C8     | 2.36                     | 0.61              |
| 1:A:314:G:H1    | 1:A:323:A:N6     | 1.99                     | 0.61              |
| 1:A:45:A:H62    | 2:B:62:ARG:HH22  | 1.47                     | 0.61              |
| 1:A:159:C:H5'   | 1:A:161:G:N1     | 2.16                     | 0.60              |
| 3:C:42:G:H2'    | 3:C:43:G:C8      | 2.37                     | 0.60              |
| 1:A:360:G:H22   | 1:A:363:A:H5''   | 1.67                     | 0.60              |
| 2:B:64:ILE:HG23 | 2:B:101:LEU:HD21 | 1.84                     | 0.60              |
| 1:A:154:U:O2'   | 1:A:217:A:N3     | 2.33                     | 0.59              |

*Continued on next page...*

*Continued from previous page...*

| Atom-1          | Atom-2           | Interatomic distance (Å) | Clash overlap (Å) |
|-----------------|------------------|--------------------------|-------------------|
| 1:A:165:G:H2'   | 1:A:166:G:C8     | 2.37                     | 0.59              |
| 1:A:379:G:H4'   | 1:A:380:A:H8     | 1.66                     | 0.59              |
| 1:A:379:G:H4'   | 1:A:380:A:C8     | 2.37                     | 0.59              |
| 2:B:113:LYS:C   | 2:B:115:ALA:H    | 2.08                     | 0.59              |
| 2:B:12:GLU:HG2  | 2:B:42:ARG:HH22  | 1.67                     | 0.59              |
| 3:C:11:U:H2'    | 3:C:12:U:C6      | 2.38                     | 0.59              |
| 3:C:9:A:N6      | 3:C:22:A:C8      | 2.69                     | 0.59              |
| 1:A:18:A:H2'    | 1:A:19:A:C8      | 2.37                     | 0.58              |
| 1:A:71:G:O2'    | 1:A:73:G:N7      | 2.31                     | 0.58              |
| 1:A:130:U:H2'   | 1:A:131:G:C8     | 2.38                     | 0.58              |
| 2:B:4:LYS:HD3   | 2:B:5:TYR:HE1    | 1.68                     | 0.58              |
| 3:C:-17:U:H3'   | 3:C:-16:G:H8     | 1.68                     | 0.58              |
| 1:A:315:G:C5    | 1:A:316:C:C4     | 2.91                     | 0.58              |
| 1:A:360:G:N2    | 1:A:363:A:H5''   | 2.18                     | 0.58              |
| 1:A:353:A:H2'   | 1:A:354:C:O4'    | 2.04                     | 0.58              |
| 1:A:354:C:H2'   | 1:A:355:G:O4'    | 2.04                     | 0.57              |
| 2:B:112:LYS:O   | 2:B:113:LYS:C    | 2.47                     | 0.57              |
| 1:A:32:G:H22    | 1:A:34:U:H1'     | 1.67                     | 0.57              |
| 1:A:218:A:C5    | 1:A:219:C:H1'    | 2.39                     | 0.57              |
| 1:A:272:G:H5''  | 1:A:272:G:C8     | 2.40                     | 0.57              |
| 1:A:6:U:H2'     | 1:A:7:C:C6       | 2.40                     | 0.57              |
| 1:A:154:U:H4'   | 1:A:218:A:H4'    | 1.87                     | 0.57              |
| 1:A:155:A:H2'   | 1:A:156:C:C6     | 2.39                     | 0.57              |
| 3:C:43:G:C3'    | 3:C:44:G:H3'     | 2.17                     | 0.57              |
| 1:A:3:U:H2'     | 1:A:4:A:H8       | 1.68                     | 0.57              |
| 1:A:172:G:H3'   | 1:A:173:G:H8     | 1.70                     | 0.57              |
| 1:A:10:G:H2'    | 1:A:11:C:H6      | 1.70                     | 0.56              |
| 1:A:2:U:H2'     | 1:A:3:U:C6       | 2.40                     | 0.56              |
| 1:A:308:A:C2    | 1:A:329:U:H5     | 2.23                     | 0.56              |
| 1:A:315:G:H2'   | 1:A:316:C:H6     | 1.67                     | 0.56              |
| 2:B:74:GLU:OE1  | 2:B:111:LEU:HD22 | 2.04                     | 0.56              |
| 1:A:9:U:H2'     | 1:A:10:G:C8      | 2.39                     | 0.56              |
| 1:A:207:C:H2'   | 1:A:208:U:C6     | 2.41                     | 0.56              |
| 1:A:241:A:H2'   | 1:A:242:C:C6     | 2.41                     | 0.56              |
| 2:B:4:LYS:HD3   | 2:B:5:TYR:CE1    | 2.40                     | 0.56              |
| 1:A:360:G:H22   | 1:A:363:A:C5'    | 2.19                     | 0.56              |
| 1:A:364:A:H3'   | 1:A:364:A:OP2    | 2.06                     | 0.56              |
| 1:A:364:A:OP2   | 1:A:365:G:O4'    | 2.21                     | 0.56              |
| 2:B:86:ARG:HH12 | 3:C:-32:G:H1'    | 1.71                     | 0.56              |
| 1:A:5:A:H2'     | 1:A:6:U:C6       | 2.41                     | 0.55              |
| 1:A:412:A:H2'   | 1:A:413:A:C8     | 2.42                     | 0.55              |

*Continued on next page...*

Continued from previous page...

| Atom-1           | Atom-2         | Interatomic distance (Å) | Clash overlap (Å) |
|------------------|----------------|--------------------------|-------------------|
| 1:A:148:A:H62    | 1:A:177:G:H21  | 1.54                     | 0.55              |
| 3:C:-15:G:H2'    | 3:C:-14:A:H8   | 1.70                     | 0.55              |
| 1:A:4:A:H2'      | 1:A:5:A:H8     | 1.70                     | 0.55              |
| 1:A:14:G:H2'     | 1:A:385:A:N1   | 2.21                     | 0.55              |
| 3:C:60:C:H2'     | 3:C:61:C:H6    | 1.71                     | 0.55              |
| 1:A:364:A:OP1    | 1:A:365:G:N7   | 2.36                     | 0.55              |
| 3:C:17:G:O2'     | 3:C:56:G:N2    | 2.35                     | 0.55              |
| 1:A:5:A:H2'      | 1:A:6:U:H6     | 1.71                     | 0.55              |
| 1:A:59:U:H2'     | 1:A:60:C:C6    | 2.42                     | 0.54              |
| 1:A:172:G:H1'    | 1:A:217:A:H61  | 1.72                     | 0.54              |
| 1:A:414:C:H2'    | 1:A:415:G:H8   | 1.72                     | 0.54              |
| 1:A:7:C:H2'      | 1:A:8:A:H8     | 1.72                     | 0.54              |
| 2:B:106:ARG:HH11 | 2:B:113:LYS:CA | 2.16                     | 0.54              |
| 1:A:198:G:N2     | 1:A:200:G:H3'  | 2.23                     | 0.53              |
| 1:A:4:A:H2'      | 1:A:5:A:C8     | 2.44                     | 0.53              |
| 1:A:122:G:H3'    | 1:A:123:C:H5'' | 1.90                     | 0.53              |
| 1:A:264:U:H2'    | 1:A:265:G:O4'  | 2.09                     | 0.53              |
| 1:A:364:A:C3'    | 1:A:365:G:O4'  | 2.56                     | 0.53              |
| 1:A:199:U:C5     | 1:A:206:G:H1'  | 2.44                     | 0.52              |
| 1:A:155:A:H2     | 1:A:170:A:N6   | 2.07                     | 0.52              |
| 1:A:168:A:H2'    | 1:A:169:U:C6   | 2.44                     | 0.52              |
| 1:A:50:A:H3'     | 1:A:51:G:H8    | 1.74                     | 0.52              |
| 1:A:186:G:N2     | 1:A:188:A:H3'  | 2.24                     | 0.52              |
| 1:A:222:U:H2'    | 1:A:223:A:C8   | 2.45                     | 0.52              |
| 3:C:44:G:H4'     | 3:C:45:G:H5'   | 1.92                     | 0.51              |
| 1:A:124:U:H2'    | 1:A:125:U:O4'  | 2.11                     | 0.51              |
| 3:C:-25:G:N2     | 3:C:-11:C:H1'  | 2.26                     | 0.51              |
| 3:C:34:C:H2'     | 3:C:35:C:C6    | 2.44                     | 0.51              |
| 1:A:6:U:H2'      | 1:A:7:C:H6     | 1.74                     | 0.51              |
| 1:A:49:A:N1      | 1:A:387:A:O2'  | 2.37                     | 0.51              |
| 1:A:208:U:H2'    | 1:A:209:C:O4'  | 2.10                     | 0.51              |
| 1:A:128:G:H2'    | 1:A:129:C:C6   | 2.46                     | 0.51              |
| 1:A:148:A:H62    | 1:A:177:G:N2   | 2.09                     | 0.51              |
| 3:C:47:C:H5''    | 3:C:49:C:OP2   | 2.11                     | 0.51              |
| 1:A:10:G:H2'     | 1:A:11:C:C6    | 2.47                     | 0.50              |
| 1:A:70:U:H2'     | 1:A:71:G:O4'   | 2.10                     | 0.50              |
| 1:A:99:A:H2'     | 1:A:100:A:C8   | 2.45                     | 0.50              |
| 3:C:-13:U:H2'    | 3:C:-12:C:C6   | 2.47                     | 0.50              |
| 1:A:317:G:N1     | 1:A:321:G:C2   | 2.79                     | 0.50              |
| 1:A:361:C:O2'    | 1:A:362:A:H3'  | 2.12                     | 0.50              |
| 1:A:373:C:H2'    | 1:A:374:A:C8   | 2.47                     | 0.50              |

Continued on next page...

*Continued from previous page...*

| Atom-1         | Atom-2         | Interatomic distance (Å) | Clash overlap (Å) |
|----------------|----------------|--------------------------|-------------------|
| 3:C:60:C:H2'   | 3:C:61:C:C6    | 2.46                     | 0.50              |
| 1:A:71:G:N2    | 1:A:73:G:H3'   | 2.26                     | 0.50              |
| 1:A:351:G:H3'  | 1:A:352:U:C6   | 2.47                     | 0.50              |
| 3:C:-22:C:H2'  | 3:C:-21:C:C6   | 2.47                     | 0.50              |
| 3:C:42:G:H2'   | 3:C:43:G:C1'   | 2.41                     | 0.50              |
| 1:A:356:A:H3'  | 1:A:357:G:H8   | 1.77                     | 0.49              |
| 1:A:186:G:H5'  | 1:A:187:A:OP2  | 2.12                     | 0.49              |
| 1:A:130:U:H2'  | 1:A:131:G:H8   | 1.78                     | 0.49              |
| 1:A:161:G:H4'  | 1:A:163:C:C5   | 2.48                     | 0.49              |
| 1:A:349:G:N2   | 1:A:379:G:O2'  | 2.44                     | 0.49              |
| 1:A:363:A:O2'  | 1:A:364:A:C1'  | 2.60                     | 0.49              |
| 1:A:174:U:H2'  | 1:A:175:U:H6   | 1.76                     | 0.49              |
| 1:A:267:U:C2   | 3:C:75:A:C2    | 3.00                     | 0.49              |
| 1:A:137:A:H8   | 1:A:137:A:H5'' | 1.78                     | 0.49              |
| 1:A:19:A:H2'   | 1:A:20:U:C6    | 2.48                     | 0.49              |
| 1:A:401:A:H2'  | 1:A:402:G:O4'  | 2.13                     | 0.49              |
| 3:C:22:A:H2'   | 3:C:23:A:O4'   | 2.12                     | 0.49              |
| 1:A:350:A:H1'  | 1:A:380:A:N1   | 2.28                     | 0.48              |
| 1:A:363:A:H5'' | 1:A:363:A:H8   | 1.74                     | 0.48              |
| 3:C:15:G:H2'   | 3:C:58:G:O6    | 2.13                     | 0.48              |
| 1:A:115:C:H2'  | 1:A:116:A:C8   | 2.48                     | 0.48              |
| 1:A:338:G:H2'  | 1:A:339:A:C8   | 2.49                     | 0.48              |
| 1:A:280:U:H2'  | 1:A:281:U:C6   | 2.48                     | 0.48              |
| 1:A:23:C:O2    | 1:A:336:A:O2'  | 2.28                     | 0.48              |
| 1:A:344:C:H2'  | 1:A:345:G:C8   | 2.47                     | 0.48              |
| 1:A:132:G:H3'  | 1:A:133:G:H8   | 1.79                     | 0.48              |
| 1:A:280:U:H2'  | 1:A:281:U:H6   | 1.79                     | 0.48              |
| 1:A:30:C:H2'   | 1:A:31:G:C8    | 2.49                     | 0.48              |
| 1:A:159:C:OP2  | 1:A:159:C:O4'  | 2.31                     | 0.48              |
| 1:A:349:G:N2   | 1:A:379:G:H1'  | 2.28                     | 0.48              |
| 1:A:385:A:H1'  | 1:A:401:A:C8   | 2.49                     | 0.48              |
| 1:A:217:A:H2'  | 1:A:218:A:O4'  | 2.14                     | 0.48              |
| 1:A:376:U:H2'  | 1:A:377:A:C8   | 2.49                     | 0.48              |
| 3:C:-27:C:C4   | 3:C:-26:G:C8   | 3.03                     | 0.47              |
| 1:A:411:U:H2'  | 1:A:412:A:C8   | 2.49                     | 0.47              |
| 3:C:44:G:H4'   | 3:C:45:G:C5'   | 2.44                     | 0.47              |
| 1:A:268:G:O6   | 3:C:75:A:N6    | 2.47                     | 0.47              |
| 1:A:360:G:H1'  | 1:A:365:G:N2   | 2.29                     | 0.47              |
| 1:A:7:C:H2'    | 1:A:8:A:C8     | 2.49                     | 0.47              |
| 1:A:239:A:H4'  | 1:A:241:A:H5'  | 1.97                     | 0.47              |
| 3:C:14:A:H2'   | 3:C:15:G:O4'   | 2.15                     | 0.47              |

*Continued on next page...*

*Continued from previous page...*

| Atom-1         | Atom-2         | Interatomic distance (Å) | Clash overlap (Å) |
|----------------|----------------|--------------------------|-------------------|
| 1:A:137:A:H5'' | 1:A:137:A:C8   | 2.49                     | 0.47              |
| 1:A:199:U:H5   | 1:A:206:G:N3   | 2.12                     | 0.47              |
| 1:A:335:G:C8   | 1:A:335:G:H3'  | 2.49                     | 0.47              |
| 2:B:105:LEU:CB | 2:B:111:LEU:HG | 2.34                     | 0.47              |
| 1:A:245:C:H2'  | 1:A:246:A:C8   | 2.50                     | 0.47              |
| 1:A:371:U:H4'  | 1:A:373:C:H5   | 1.79                     | 0.47              |
| 1:A:338:G:H2'  | 1:A:339:A:H8   | 1.80                     | 0.47              |
| 1:A:350:A:H1'  | 1:A:380:A:C2   | 2.50                     | 0.47              |
| 1:A:151:A:H2'  | 1:A:152:C:O4'  | 2.15                     | 0.46              |
| 2:B:111:LEU:O  | 2:B:113:LYS:N  | 2.46                     | 0.46              |
| 3:C:-10:G:H3'  | 3:C:-9:G:H8    | 1.81                     | 0.46              |
| 1:A:363:A:O2'  | 1:A:364:A:O4'  | 2.33                     | 0.46              |
| 1:A:285:G:O2'  | 1:A:300:A:N6   | 2.49                     | 0.46              |
| 3:C:-26:G:H2'  | 3:C:-25:G:C5'  | 2.43                     | 0.46              |
| 1:A:171:U:H2'  | 1:A:172:G:O4'  | 2.16                     | 0.46              |
| 1:A:230:G:C6   | 3:C:55:C:H1'   | 2.51                     | 0.46              |
| 1:A:354:C:O2   | 1:A:375:G:N1   | 2.44                     | 0.46              |
| 3:C:-7:U:O2'   | 3:C:-6:C:H5'   | 2.16                     | 0.46              |
| 1:A:159:C:O4'  | 1:A:159:C:P    | 2.74                     | 0.46              |
| 1:A:199:U:H5   | 1:A:206:G:H1'  | 1.80                     | 0.46              |
| 3:C:38:G:H2'   | 3:C:39:G:C8    | 2.51                     | 0.46              |
| 1:A:319:A:H1'  | 1:A:320:U:C5   | 2.51                     | 0.46              |
| 3:C:-9:G:H2'   | 3:C:-8:A:O4'   | 2.15                     | 0.46              |
| 1:A:315:G:C6   | 1:A:316:C:C4   | 3.03                     | 0.46              |
| 1:A:292:A:H2'  | 1:A:293:U:C6   | 2.51                     | 0.45              |
| 3:C:17:G:N2    | 3:C:56:G:H2'   | 2.31                     | 0.45              |
| 1:A:50:A:N3    | 1:A:50:A:H2'   | 2.31                     | 0.45              |
| 1:A:68:G:N3    | 1:A:68:G:H2'   | 2.31                     | 0.45              |
| 3:C:-20:U:H2'  | 3:C:-19:U:O4'  | 2.16                     | 0.45              |
| 3:C:-13:U:H2'  | 3:C:-12:C:H6   | 1.79                     | 0.45              |
| 3:C:-28:C:H2'  | 3:C:-27:C:C6   | 2.51                     | 0.45              |
| 3:C:9:A:N7     | 3:C:22:A:N7    | 2.63                     | 0.45              |
| 1:A:268:G:C6   | 3:C:75:A:N1    | 2.85                     | 0.45              |
| 1:A:246:A:H2'  | 1:A:247:C:O4'  | 2.16                     | 0.45              |
| 1:A:32:G:H2'   | 1:A:32:G:N3    | 2.32                     | 0.45              |
| 1:A:170:A:H3'  | 1:A:171:U:H6   | 1.81                     | 0.45              |
| 1:A:216:A:HO2' | 1:A:217:A:H8   | 1.63                     | 0.45              |
| 1:A:229:G:N2   | 1:A:231:A:H3'  | 2.32                     | 0.45              |
| 1:A:349:G:H22  | 1:A:379:G:C1'  | 2.25                     | 0.45              |
| 1:A:220:C:H2'  | 1:A:221:U:C6   | 2.52                     | 0.45              |
| 1:A:292:A:H2'  | 1:A:293:U:H6   | 1.82                     | 0.45              |

*Continued on next page...*

Continued from previous page...

| Atom-1           | Atom-2          | Interatomic distance (Å) | Clash overlap (Å) |
|------------------|-----------------|--------------------------|-------------------|
| 1:A:380:A:H2'    | 1:A:380:A:N3    | 2.32                     | 0.45              |
| 2:B:12:GLU:HG2   | 2:B:42:ARG:NH2  | 2.32                     | 0.45              |
| 3:C:35:C:H2'     | 3:C:36:A:O4'    | 2.17                     | 0.45              |
| 1:A:60:C:H2'     | 1:A:61:G:H8     | 1.82                     | 0.45              |
| 1:A:114:G:H2'    | 1:A:115:C:C6    | 2.52                     | 0.45              |
| 1:A:416:U:H2'    | 1:A:417:C:O4'   | 2.17                     | 0.45              |
| 1:A:216:A:O2'    | 1:A:217:A:H8    | 1.99                     | 0.45              |
| 1:A:222:U:H2'    | 1:A:223:A:H8    | 1.81                     | 0.45              |
| 1:A:360:G:H3'    | 1:A:361:C:H6    | 1.82                     | 0.45              |
| 1:A:147:A:H62    | 1:A:178:A:H62   | 1.63                     | 0.44              |
| 1:A:17:U:H2'     | 1:A:18:A:H8     | 1.82                     | 0.44              |
| 1:A:331:G:H4'    | 1:A:332:A:H5'   | 1.98                     | 0.44              |
| 1:A:364:A:H2'    | 1:A:365:G:O4'   | 2.18                     | 0.44              |
| 2:B:3:LYS:HB3    | 2:B:8:LYS:HE3   | 1.98                     | 0.44              |
| 1:A:14:G:C2'     | 1:A:401:A:H61   | 2.31                     | 0.44              |
| 1:A:32:G:N2      | 1:A:34:U:H1'    | 2.32                     | 0.44              |
| 1:A:358:G:H1     | 1:A:366:C:H42   | 1.66                     | 0.44              |
| 1:A:365:G:H2'    | 1:A:365:G:N3    | 2.33                     | 0.43              |
| 1:A:242:C:H2'    | 1:A:243:C:O4'   | 2.18                     | 0.43              |
| 1:A:312:G:C2     | 1:A:326:C:C2    | 3.07                     | 0.43              |
| 1:A:355:G:H2'    | 1:A:356:A:C8    | 2.53                     | 0.43              |
| 2:B:24:ALA:HB2   | 2:B:29:VAL:HG13 | 1.98                     | 0.43              |
| 2:B:105:LEU:HD12 | 2:B:105:LEU:HA  | 1.80                     | 0.43              |
| 1:A:308:A:H2'    | 1:A:309:C:O4'   | 2.18                     | 0.43              |
| 1:A:123:C:H2'    | 1:A:124:U:O4'   | 2.19                     | 0.43              |
| 1:A:317:G:C5     | 1:A:318:C:N3    | 2.86                     | 0.43              |
| 1:A:382:G:H2'    | 1:A:383:G:O4'   | 2.18                     | 0.43              |
| 1:A:154:U:H2'    | 1:A:155:A:C4    | 2.53                     | 0.43              |
| 2:B:73:GLU:N     | 2:B:73:GLU:OE1  | 2.52                     | 0.43              |
| 1:A:166:G:H2'    | 1:A:167:G:C8    | 2.54                     | 0.43              |
| 1:A:380:A:C2     | 1:A:381:A:H1'   | 2.54                     | 0.43              |
| 3:C:12:U:H3      | 3:C:22:A:H61    | 1.67                     | 0.43              |
| 3:C:64:U:H2'     | 3:C:65:C:C6     | 2.54                     | 0.43              |
| 1:A:324:G:H2'    | 1:A:325:C:H6    | 1.84                     | 0.42              |
| 1:A:343:C:H2'    | 1:A:344:C:C6    | 2.54                     | 0.42              |
| 1:A:160:C:H1'    | 1:A:167:G:N2    | 2.27                     | 0.42              |
| 3:C:-22:C:H2'    | 3:C:-21:C:H6    | 1.83                     | 0.42              |
| 3:C:8:U:H5'      | 3:C:48:G:H5'    | 2.01                     | 0.42              |
| 3:C:9:A:N6       | 3:C:21:G:C8     | 2.87                     | 0.42              |
| 1:A:128:G:H2'    | 1:A:129:C:H6    | 1.82                     | 0.42              |
| 1:A:95:A:H2'     | 1:A:96:G:C8     | 2.55                     | 0.42              |

Continued on next page...

*Continued from previous page...*

| Atom-1         | Atom-2          | Interatomic distance (Å) | Clash overlap (Å) |
|----------------|-----------------|--------------------------|-------------------|
| 1:A:95:A:H2'   | 1:A:96:G:H8     | 1.85                     | 0.42              |
| 1:A:260:C:H2'  | 1:A:261:A:O4'   | 2.20                     | 0.42              |
| 1:A:364:A:H3'  | 1:A:364:A:P     | 2.60                     | 0.42              |
| 1:A:414:C:H2'  | 1:A:415:G:C8    | 2.53                     | 0.42              |
| 3:C:26:C:H2'   | 3:C:27:C:C6     | 2.55                     | 0.42              |
| 1:A:17:U:H2'   | 1:A:18:A:C8     | 2.55                     | 0.42              |
| 2:B:11:GLU:O   | 2:B:15:GLU:HG3  | 2.19                     | 0.42              |
| 1:A:82:A:H2'   | 1:A:83:G:O4'    | 2.19                     | 0.42              |
| 1:A:406:A:H2'  | 1:A:407:U:O4'   | 2.20                     | 0.42              |
| 3:C:43:G:H2'   | 3:C:43:G:N3     | 2.34                     | 0.42              |
| 1:A:38:G:H2'   | 1:A:39:C:C6     | 2.55                     | 0.42              |
| 3:C:-11:C:C2   | 3:C:-10:G:C8    | 3.08                     | 0.42              |
| 1:A:87:U:H2'   | 1:A:88:C:C6     | 2.55                     | 0.42              |
| 1:A:153:C:H1'  | 1:A:173:G:N2    | 2.34                     | 0.42              |
| 1:A:321:G:H2'  | 1:A:322:C:C6    | 2.55                     | 0.42              |
| 1:A:334:A:H62  | 2:B:10:ASN:ND2  | 2.17                     | 0.42              |
| 1:A:335:G:C8   | 1:A:335:G:C3'   | 3.03                     | 0.42              |
| 1:A:170:A:H3'  | 1:A:171:U:C6    | 2.55                     | 0.41              |
| 1:A:221:U:H2'  | 1:A:222:U:C6    | 2.55                     | 0.41              |
| 1:A:335:G:H3'  | 1:A:335:G:H8    | 1.85                     | 0.41              |
| 1:A:10:G:C6    | 1:A:406:A:N1    | 2.88                     | 0.41              |
| 1:A:115:C:H2'  | 1:A:116:A:H8    | 1.85                     | 0.41              |
| 1:A:279:C:H2'  | 1:A:280:U:C6    | 2.55                     | 0.41              |
| 1:A:377:A:H3'  | 1:A:378:C:H6    | 1.86                     | 0.41              |
| 1:A:219:C:H2'  | 1:A:220:C:C6    | 2.55                     | 0.41              |
| 1:A:279:C:H2'  | 1:A:280:U:H6    | 1.85                     | 0.41              |
| 1:A:50:A:C8    | 1:A:50:A:C5'    | 2.98                     | 0.41              |
| 1:A:334:A:H62  | 2:B:10:ASN:HD22 | 1.68                     | 0.41              |
| 1:A:344:C:H2'  | 1:A:345:G:H8    | 1.85                     | 0.41              |
| 1:A:9:U:C2     | 1:A:10:G:C8     | 3.09                     | 0.41              |
| 2:B:99:LYS:HB2 | 2:B:99:LYS:HE3  | 1.71                     | 0.41              |
| 2:B:113:LYS:C  | 2:B:115:ALA:N   | 2.74                     | 0.41              |
| 1:A:45:A:H2    | 1:A:388:G:H2'   | 1.82                     | 0.41              |
| 1:A:83:G:O6    | 1:A:250:G:H1'   | 2.20                     | 0.41              |
| 1:A:56:U:H2'   | 1:A:57:G:H8     | 1.85                     | 0.41              |
| 1:A:134:C:H2'  | 1:A:135:U:C6    | 2.56                     | 0.41              |
| 1:A:266:A:N3   | 1:A:266:A:H2'   | 2.36                     | 0.41              |
| 1:A:315:G:C2   | 1:A:323:A:C2    | 3.08                     | 0.41              |
| 1:A:59:U:H2'   | 1:A:60:C:H6     | 1.84                     | 0.41              |
| 1:A:156:C:H1'  | 1:A:216:A:C2    | 2.55                     | 0.41              |
| 1:A:281:U:H2'  | 1:A:282:C:H6    | 1.86                     | 0.41              |

*Continued on next page...*

Continued from previous page...

| Atom-1        | Atom-2        | Interatomic distance (Å) | Clash overlap (Å) |
|---------------|---------------|--------------------------|-------------------|
| 1:A:356:A:H3' | 1:A:357:G:C8  | 2.56                     | 0.41              |
| 3:C:17:G:H21  | 3:C:56:G:H2'  | 1.86                     | 0.41              |
| 1:A:287:A:H3' | 1:A:288:G:H8  | 1.85                     | 0.41              |
| 1:A:352:U:H2' | 1:A:353:A:H8  | 1.83                     | 0.41              |
| 1:A:380:A:C2  | 1:A:381:A:N9  | 2.89                     | 0.41              |
| 1:A:180:U:O2' | 1:A:181:A:H5' | 2.21                     | 0.40              |
| 1:A:322:C:H2' | 1:A:323:A:C8  | 2.55                     | 0.40              |
| 1:A:117:G:H3' | 1:A:118:C:H6  | 1.86                     | 0.40              |
| 1:A:158:U:O5' | 1:A:158:U:C6  | 2.65                     | 0.40              |
| 1:A:352:U:O2  | 1:A:377:A:H2  | 2.05                     | 0.40              |
| 3:C:16:U:H5   | 3:C:58:G:O6   | 2.04                     | 0.40              |
| 3:C:34:C:H2'  | 3:C:35:C:H6   | 1.86                     | 0.40              |
| 1:A:19:A:H2'  | 1:A:20:U:H6   | 1.85                     | 0.40              |
| 1:A:357:G:H22 | 1:A:367:C:H42 | 1.70                     | 0.40              |
| 1:A:32:G:H3'  | 1:A:33:U:C6   | 2.57                     | 0.40              |
| 1:A:92:C:H2'  | 1:A:93:C:C6   | 2.57                     | 0.40              |
| 1:A:155:A:C6  | 1:A:156:C:N4  | 2.90                     | 0.40              |
| 1:A:268:G:C6  | 3:C:75:A:C6   | 3.10                     | 0.40              |

There are no symmetry-related clashes.

### 5.3 Torsion angles [i](#)

#### 5.3.1 Protein backbone [i](#)

In the following table, the Percentiles column shows the percent Ramachandran outliers of the chain as a percentile score with respect to all PDB entries followed by that with respect to all EM entries.

The Analysed column shows the number of residues for which the backbone conformation was analysed, and the total number of residues.

| Mol | Chain | Analysed      | Favoured  | Allowed | Outliers | Percentiles        |
|-----|-------|---------------|-----------|---------|----------|--------------------|
| 2   | B     | 114/116 (98%) | 109 (96%) | 3 (3%)  | 2 (2%)   | <b>7</b> <b>18</b> |

All (2) Ramachandran outliers are listed below:

| Mol | Chain | Res | Type |
|-----|-------|-----|------|
| 2   | B     | 113 | LYS  |
| 2   | B     | 112 | LYS  |

### 5.3.2 Protein sidechains [i](#)

In the following table, the Percentiles column shows the percent sidechain outliers of the chain as a percentile score with respect to all PDB entries followed by that with respect to all EM entries.

The Analysed column shows the number of residues for which the sidechain conformation was analysed, and the total number of residues.

| Mol | Chain | Analysed     | Rotameric | Outliers | Percentiles |
|-----|-------|--------------|-----------|----------|-------------|
| 2   | B     | 99/99 (100%) | 90 (91%)  | 9 (9%)   | 7 19        |

All (9) residues with a non-rotameric sidechain are listed below:

| Mol | Chain | Res | Type |
|-----|-------|-----|------|
| 2   | B     | 3   | LYS  |
| 2   | B     | 4   | LYS  |
| 2   | B     | 71  | LEU  |
| 2   | B     | 92  | MET  |
| 2   | B     | 99  | LYS  |
| 2   | B     | 105 | LEU  |
| 2   | B     | 112 | LYS  |
| 2   | B     | 113 | LYS  |
| 2   | B     | 114 | GLU  |

Sometimes sidechains can be flipped to improve hydrogen bonding and reduce clashes. All (3) such sidechains are listed below:

| Mol | Chain | Res | Type |
|-----|-------|-----|------|
| 2   | B     | 10  | ASN  |
| 2   | B     | 14  | GLN  |
| 2   | B     | 87  | GLN  |

### 5.3.3 RNA [i](#)

| Mol | Chain | Analysed      | Backbone Outliers | Pucker Outliers |
|-----|-------|---------------|-------------------|-----------------|
| 1   | A     | 416/417 (99%) | 180 (43%)         | 17 (4%)         |
| 3   | C     | 107/111 (96%) | 44 (41%)          | 10 (9%)         |
| All | All   | 523/528 (99%) | 224 (42%)         | 27 (5%)         |

All (224) RNA backbone outliers are listed below:

| Mol | Chain | Res | Type |
|-----|-------|-----|------|
| 1   | A     | 2   | U    |
| 1   | A     | 9   | U    |
| 1   | A     | 11  | C    |
| 1   | A     | 15  | G    |
| 1   | A     | 28  | G    |
| 1   | A     | 30  | C    |
| 1   | A     | 32  | G    |
| 1   | A     | 33  | U    |
| 1   | A     | 35  | U    |
| 1   | A     | 36  | C    |
| 1   | A     | 44  | G    |
| 1   | A     | 47  | G    |
| 1   | A     | 48  | A    |
| 1   | A     | 49  | A    |
| 1   | A     | 50  | A    |
| 1   | A     | 51  | G    |
| 1   | A     | 52  | U    |
| 1   | A     | 53  | C    |
| 1   | A     | 54  | C    |
| 1   | A     | 63  | A    |
| 1   | A     | 67  | U    |
| 1   | A     | 68  | G    |
| 1   | A     | 70  | U    |
| 1   | A     | 74  | A    |
| 1   | A     | 75  | U    |
| 1   | A     | 76  | G    |
| 1   | A     | 81  | U    |
| 1   | A     | 83  | G    |
| 1   | A     | 85  | G    |
| 1   | A     | 86  | U    |
| 1   | A     | 87  | U    |
| 1   | A     | 88  | C    |
| 1   | A     | 90  | U    |
| 1   | A     | 91  | G    |
| 1   | A     | 92  | C    |
| 1   | A     | 99  | A    |
| 1   | A     | 101 | U    |
| 1   | A     | 102 | C    |
| 1   | A     | 106 | A    |
| 1   | A     | 108 | G    |
| 1   | A     | 109 | C    |
| 1   | A     | 117 | G    |
| 1   | A     | 118 | C    |

*Continued on next page...*

*Continued from previous page...*

| Mol | Chain | Res | Type |
|-----|-------|-----|------|
| 1   | A     | 122 | G    |
| 1   | A     | 123 | C    |
| 1   | A     | 126 | U    |
| 1   | A     | 127 | G    |
| 1   | A     | 128 | G    |
| 1   | A     | 130 | U    |
| 1   | A     | 131 | G    |
| 1   | A     | 132 | G    |
| 1   | A     | 134 | C    |
| 1   | A     | 137 | A    |
| 1   | A     | 138 | C    |
| 1   | A     | 139 | G    |
| 1   | A     | 142 | G    |
| 1   | A     | 143 | G    |
| 1   | A     | 150 | A    |
| 1   | A     | 151 | A    |
| 1   | A     | 152 | C    |
| 1   | A     | 153 | C    |
| 1   | A     | 155 | A    |
| 1   | A     | 158 | U    |
| 1   | A     | 159 | C    |
| 1   | A     | 160 | C    |
| 1   | A     | 161 | G    |
| 1   | A     | 162 | G    |
| 1   | A     | 163 | C    |
| 1   | A     | 164 | U    |
| 1   | A     | 171 | U    |
| 1   | A     | 172 | G    |
| 1   | A     | 174 | U    |
| 1   | A     | 175 | U    |
| 1   | A     | 177 | G    |
| 1   | A     | 178 | A    |
| 1   | A     | 179 | U    |
| 1   | A     | 180 | U    |
| 1   | A     | 181 | A    |
| 1   | A     | 186 | G    |
| 1   | A     | 187 | A    |
| 1   | A     | 190 | G    |
| 1   | A     | 191 | U    |
| 1   | A     | 192 | G    |
| 1   | A     | 194 | C    |
| 1   | A     | 202 | C    |

*Continued on next page...*

*Continued from previous page...*

| Mol | Chain | Res | Type |
|-----|-------|-----|------|
| 1   | A     | 203 | G    |
| 1   | A     | 204 | G    |
| 1   | A     | 205 | A    |
| 1   | A     | 207 | C    |
| 1   | A     | 208 | U    |
| 1   | A     | 209 | C    |
| 1   | A     | 212 | A    |
| 1   | A     | 213 | G    |
| 1   | A     | 214 | G    |
| 1   | A     | 216 | A    |
| 1   | A     | 219 | C    |
| 1   | A     | 220 | C    |
| 1   | A     | 225 | A    |
| 1   | A     | 226 | G    |
| 1   | A     | 227 | G    |
| 1   | A     | 230 | G    |
| 1   | A     | 233 | C    |
| 1   | A     | 234 | G    |
| 1   | A     | 235 | C    |
| 1   | A     | 238 | U    |
| 1   | A     | 240 | A    |
| 1   | A     | 241 | A    |
| 1   | A     | 243 | C    |
| 1   | A     | 250 | G    |
| 1   | A     | 255 | A    |
| 1   | A     | 256 | A    |
| 1   | A     | 257 | A    |
| 1   | A     | 266 | A    |
| 1   | A     | 267 | U    |
| 1   | A     | 269 | G    |
| 1   | A     | 270 | U    |
| 1   | A     | 271 | A    |
| 1   | A     | 272 | G    |
| 1   | A     | 273 | G    |
| 1   | A     | 274 | G    |
| 1   | A     | 276 | C    |
| 1   | A     | 278 | C    |
| 1   | A     | 291 | A    |
| 1   | A     | 292 | A    |
| 1   | A     | 293 | U    |
| 1   | A     | 296 | A    |
| 1   | A     | 300 | A    |

*Continued on next page...*

*Continued from previous page...*

| Mol | Chain | Res | Type |
|-----|-------|-----|------|
| 1   | A     | 304 | A    |
| 1   | A     | 309 | C    |
| 1   | A     | 312 | G    |
| 1   | A     | 314 | G    |
| 1   | A     | 317 | G    |
| 1   | A     | 318 | C    |
| 1   | A     | 321 | G    |
| 1   | A     | 322 | C    |
| 1   | A     | 323 | A    |
| 1   | A     | 324 | G    |
| 1   | A     | 328 | G    |
| 1   | A     | 329 | U    |
| 1   | A     | 330 | A    |
| 1   | A     | 333 | U    |
| 1   | A     | 334 | A    |
| 1   | A     | 342 | A    |
| 1   | A     | 346 | C    |
| 1   | A     | 349 | G    |
| 1   | A     | 350 | A    |
| 1   | A     | 351 | G    |
| 1   | A     | 353 | A    |
| 1   | A     | 354 | C    |
| 1   | A     | 358 | G    |
| 1   | A     | 359 | C    |
| 1   | A     | 361 | C    |
| 1   | A     | 362 | A    |
| 1   | A     | 363 | A    |
| 1   | A     | 364 | A    |
| 1   | A     | 365 | G    |
| 1   | A     | 366 | C    |
| 1   | A     | 367 | C    |
| 1   | A     | 368 | G    |
| 1   | A     | 369 | C    |
| 1   | A     | 372 | G    |
| 1   | A     | 373 | C    |
| 1   | A     | 375 | G    |
| 1   | A     | 376 | U    |
| 1   | A     | 379 | G    |
| 1   | A     | 380 | A    |
| 1   | A     | 381 | A    |
| 1   | A     | 382 | G    |
| 1   | A     | 383 | G    |

*Continued on next page...*

*Continued from previous page...*

| Mol | Chain | Res | Type |
|-----|-------|-----|------|
| 1   | A     | 384 | U    |
| 1   | A     | 389 | A    |
| 1   | A     | 391 | C    |
| 1   | A     | 392 | A    |
| 1   | A     | 400 | U    |
| 1   | A     | 401 | A    |
| 1   | A     | 402 | G    |
| 1   | A     | 403 | A    |
| 1   | A     | 407 | U    |
| 1   | A     | 408 | G    |
| 1   | A     | 410 | U    |
| 3   | C     | -27 | C    |
| 3   | C     | -26 | G    |
| 3   | C     | -25 | G    |
| 3   | C     | -24 | A    |
| 3   | C     | -18 | U    |
| 3   | C     | -17 | U    |
| 3   | C     | -16 | G    |
| 3   | C     | -9  | G    |
| 3   | C     | -7  | U    |
| 3   | C     | -6  | C    |
| 3   | C     | -4  | C    |
| 3   | C     | -3  | U    |
| 3   | C     | -2  | U    |
| 3   | C     | -1  | U    |
| 3   | C     | 1   | G    |
| 3   | C     | 4   | G    |
| 3   | C     | 8   | U    |
| 3   | C     | 9   | A    |
| 3   | C     | 10  | G    |
| 3   | C     | 13  | C    |
| 3   | C     | 14  | A    |
| 3   | C     | 16  | U    |
| 3   | C     | 17  | G    |
| 3   | C     | 18  | G    |
| 3   | C     | 19  | U    |
| 3   | C     | 20  | A    |
| 3   | C     | 21  | G    |
| 3   | C     | 22  | A    |
| 3   | C     | 28  | A    |
| 3   | C     | 29  | C    |
| 3   | C     | 33  | G    |

*Continued on next page...*

Continued from previous page...

| Mol | Chain | Res | Type |
|-----|-------|-----|------|
| 3   | C     | 35  | C    |
| 3   | C     | 41  | G    |
| 3   | C     | 42  | G    |
| 3   | C     | 43  | G    |
| 3   | C     | 44  | G    |
| 3   | C     | 45  | G    |
| 3   | C     | 46  | U    |
| 3   | C     | 47  | C    |
| 3   | C     | 48  | G    |
| 3   | C     | 52  | G    |
| 3   | C     | 60  | C    |
| 3   | C     | 72  | U    |
| 3   | C     | 74  | C    |

All (27) RNA pucker outliers are listed below:

| Mol | Chain | Res | Type |
|-----|-------|-----|------|
| 1   | A     | 50  | A    |
| 1   | A     | 52  | U    |
| 1   | A     | 67  | U    |
| 1   | A     | 75  | U    |
| 1   | A     | 122 | G    |
| 1   | A     | 126 | U    |
| 1   | A     | 137 | A    |
| 1   | A     | 176 | C    |
| 1   | A     | 201 | A    |
| 1   | A     | 232 | A    |
| 1   | A     | 240 | A    |
| 1   | A     | 271 | A    |
| 1   | A     | 272 | G    |
| 1   | A     | 292 | A    |
| 1   | A     | 349 | G    |
| 1   | A     | 363 | A    |
| 1   | A     | 365 | G    |
| 3   | C     | -18 | U    |
| 3   | C     | -4  | C    |
| 3   | C     | -2  | U    |
| 3   | C     | 7   | G    |
| 3   | C     | 17  | G    |
| 3   | C     | 19  | U    |
| 3   | C     | 44  | G    |
| 3   | C     | 46  | U    |

Continued on next page...

*Continued from previous page...*

| Mol | Chain | Res | Type |
|-----|-------|-----|------|
| 3   | C     | 47  | C    |
| 3   | C     | 59  | U    |

#### 5.4 Non-standard residues in protein, DNA, RNA chains [i](#)

There are no non-standard protein/DNA/RNA residues in this entry.

#### 5.5 Carbohydrates [i](#)

There are no oligosaccharides in this entry.

#### 5.6 Ligand geometry [i](#)

Of 29 ligands modelled in this entry, 29 are monoatomic - leaving 0 for Mogul analysis.

There are no bond length outliers.

There are no bond angle outliers.

There are no chirality outliers.

There are no torsion outliers.

There are no ring outliers.

No monomer is involved in short contacts.

#### 5.7 Other polymers [i](#)

There are no such residues in this entry.

#### 5.8 Polymer linkage issues [i](#)

There are no chain breaks in this entry.

## 6 Map visualisation [i](#)

This section contains visualisations of the EMDB entry EMD-70948. These allow visual inspection of the internal detail of the map and identification of artifacts.

Images derived from a raw map, generated by summing the deposited half-maps, are presented below the corresponding image components of the primary map to allow further visual inspection and comparison with those of the primary map.

### 6.1 Orthogonal projections [i](#)

#### 6.1.1 Primary map

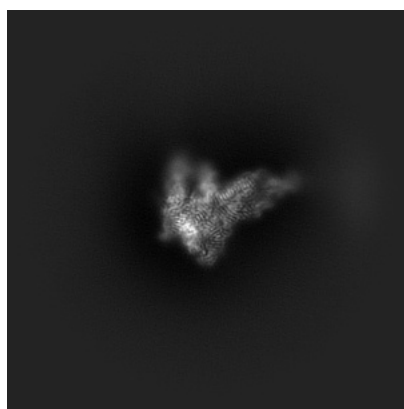

X

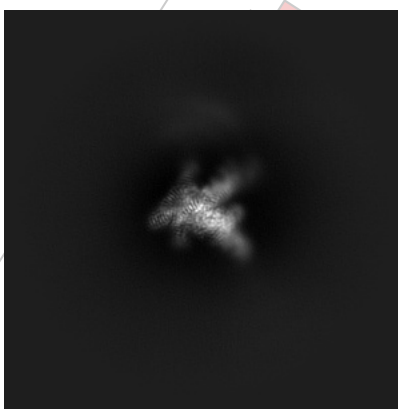

Y

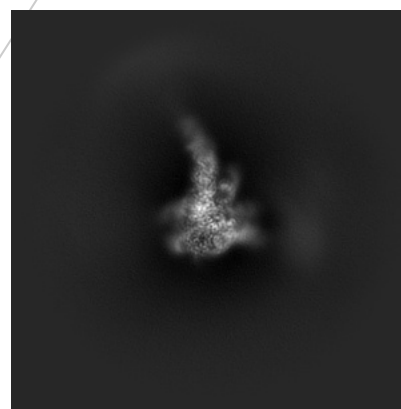

Z

#### 6.1.2 Raw map

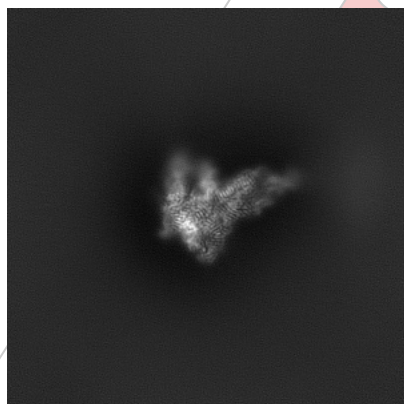

X

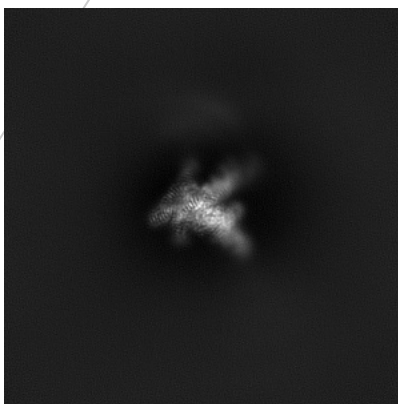

Y

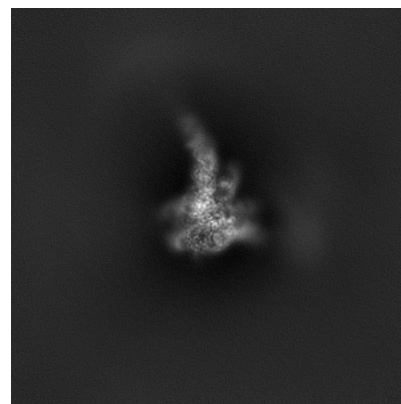

Z

The images above show the map projected in three orthogonal directions.

## 6.2 Central slices [i](#)

### 6.2.1 Primary map

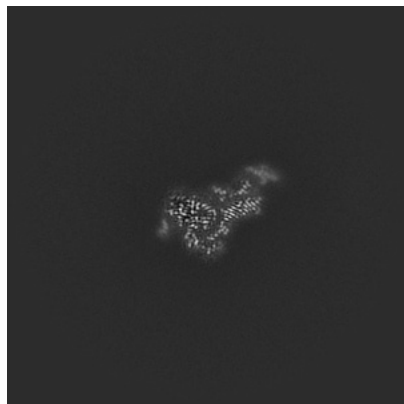

X Index: 200

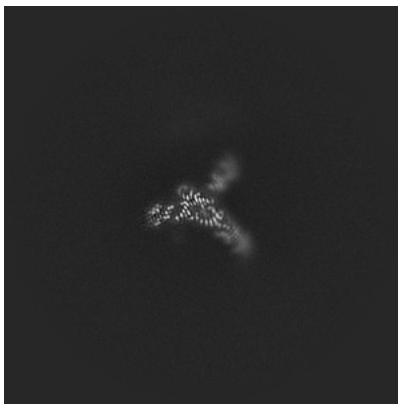

Y Index: 200

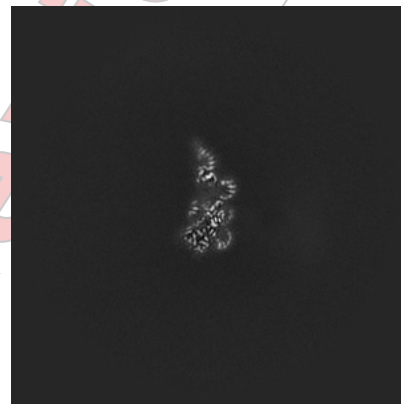

Z Index: 200

### 6.2.2 Raw map

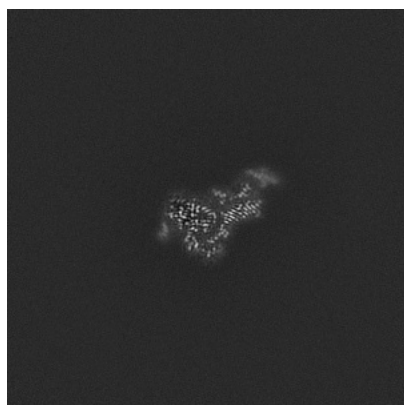

X Index: 200

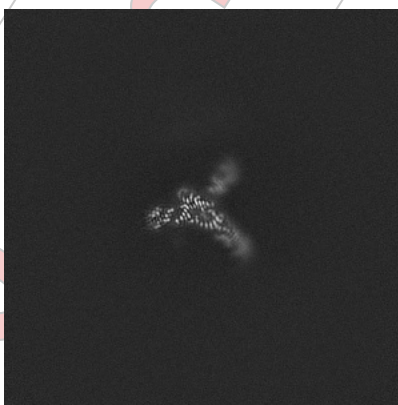

Y Index: 200

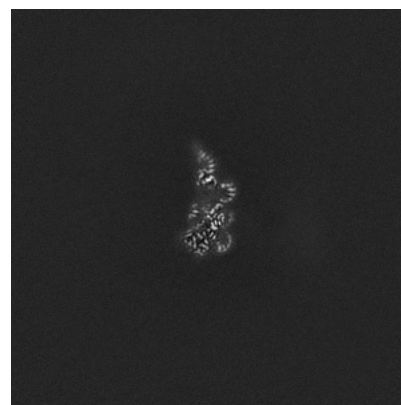

Z Index: 200

The images above show central slices of the map in three orthogonal directions.

## 6.3 Largest variance slices [i](#)

### 6.3.1 Primary map

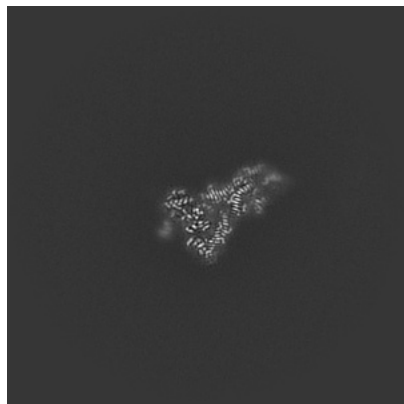

X Index: 195

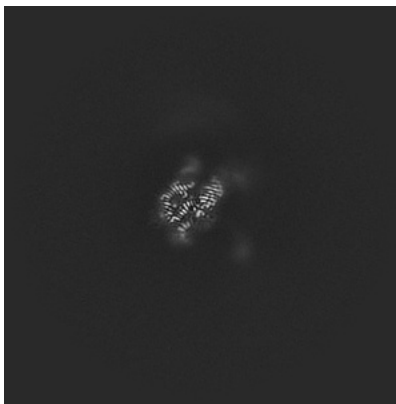

Y Index: 186



Z Index: 200

### 6.3.2 Raw map

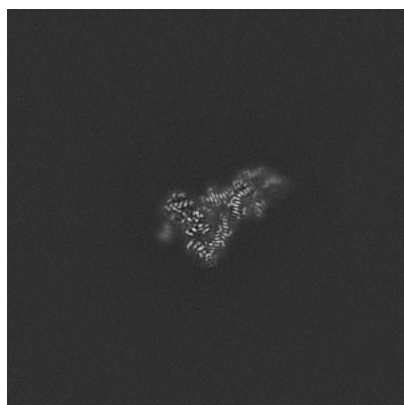

X Index: 195

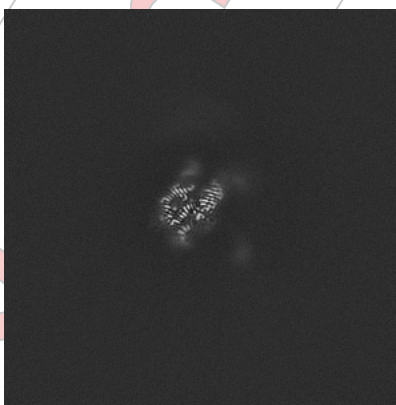

Y Index: 186



Z Index: 200

The images above show the largest variance slices of the map in three orthogonal directions.

## 6.4 Orthogonal standard-deviation projections (False-color) [i](#)

### 6.4.1 Primary map

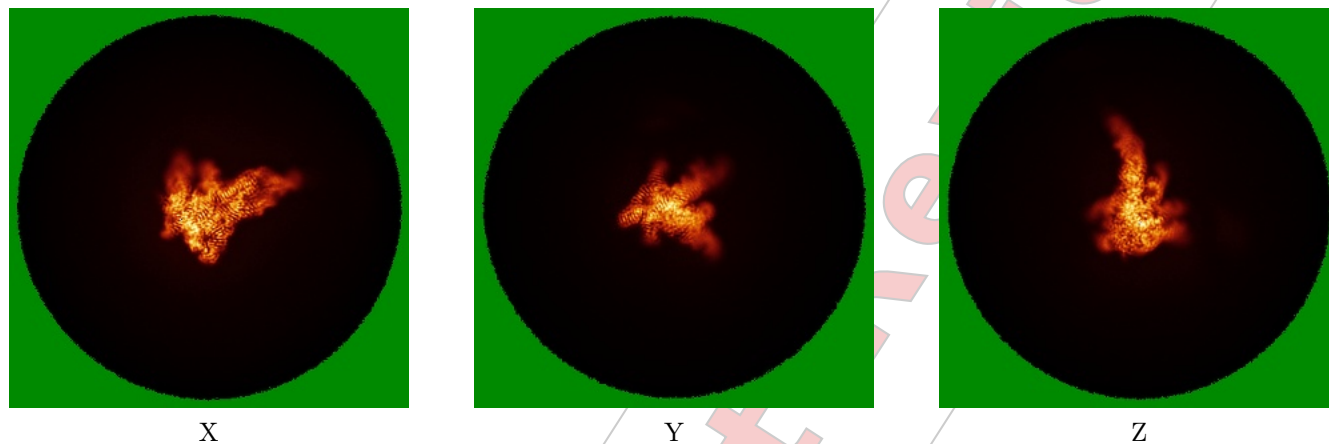

### 6.4.2 Raw map

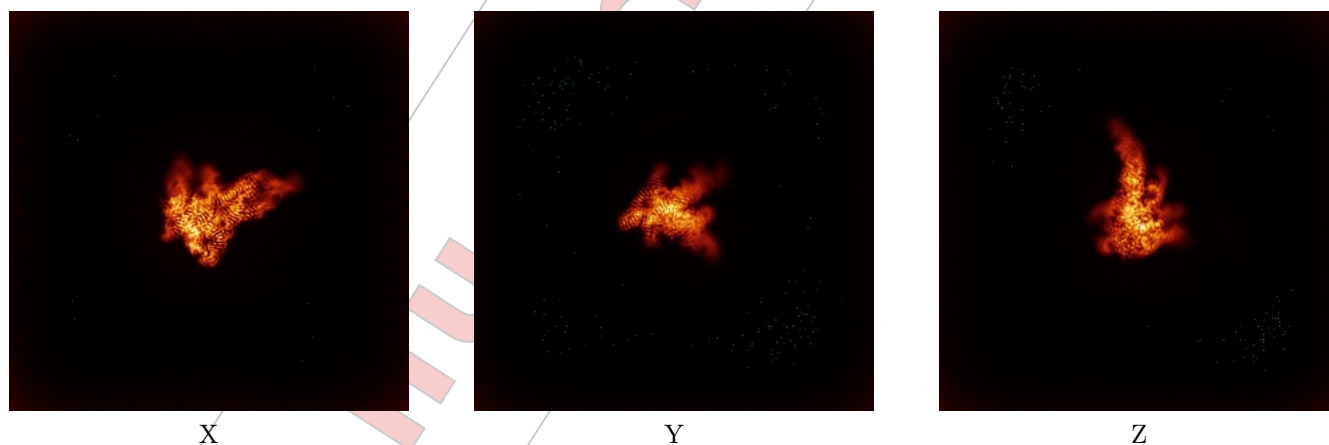

The images above show the map standard deviation projections with false color in three orthogonal directions. Minimum values are shown in green, max in blue, and dark to light orange shades represent small to large values respectively.

## 6.5 Orthogonal surface views [i](#)

### 6.5.1 Primary map

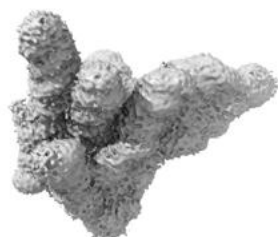

X

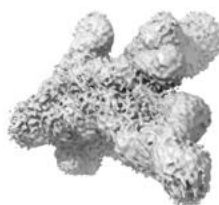

Y

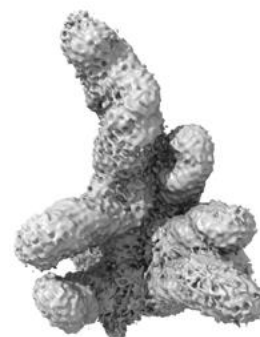

Z

The images above show the 3D surface view of the map at the recommended contour level 0.02. These images, in conjunction with the slice images, may facilitate assessment of whether an appropriate contour level has been provided.

### 6.5.2 Raw map

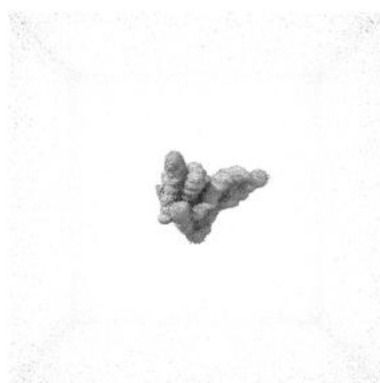

X

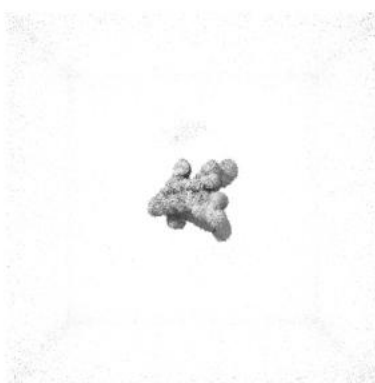

Y

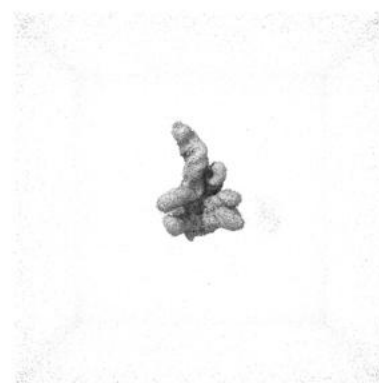

Z

These images show the 3D surface of the raw map. The raw map's contour level was selected so that its surface encloses the same volume as the primary map does at its recommended contour level.

## 6.6 Mask visualisation [i](#)

This section was not generated. No masks/segmentation were deposited.

## 7 Map analysis [i](#)

This section contains the results of statistical analysis of the map.

### 7.1 Map-value distribution [i](#)

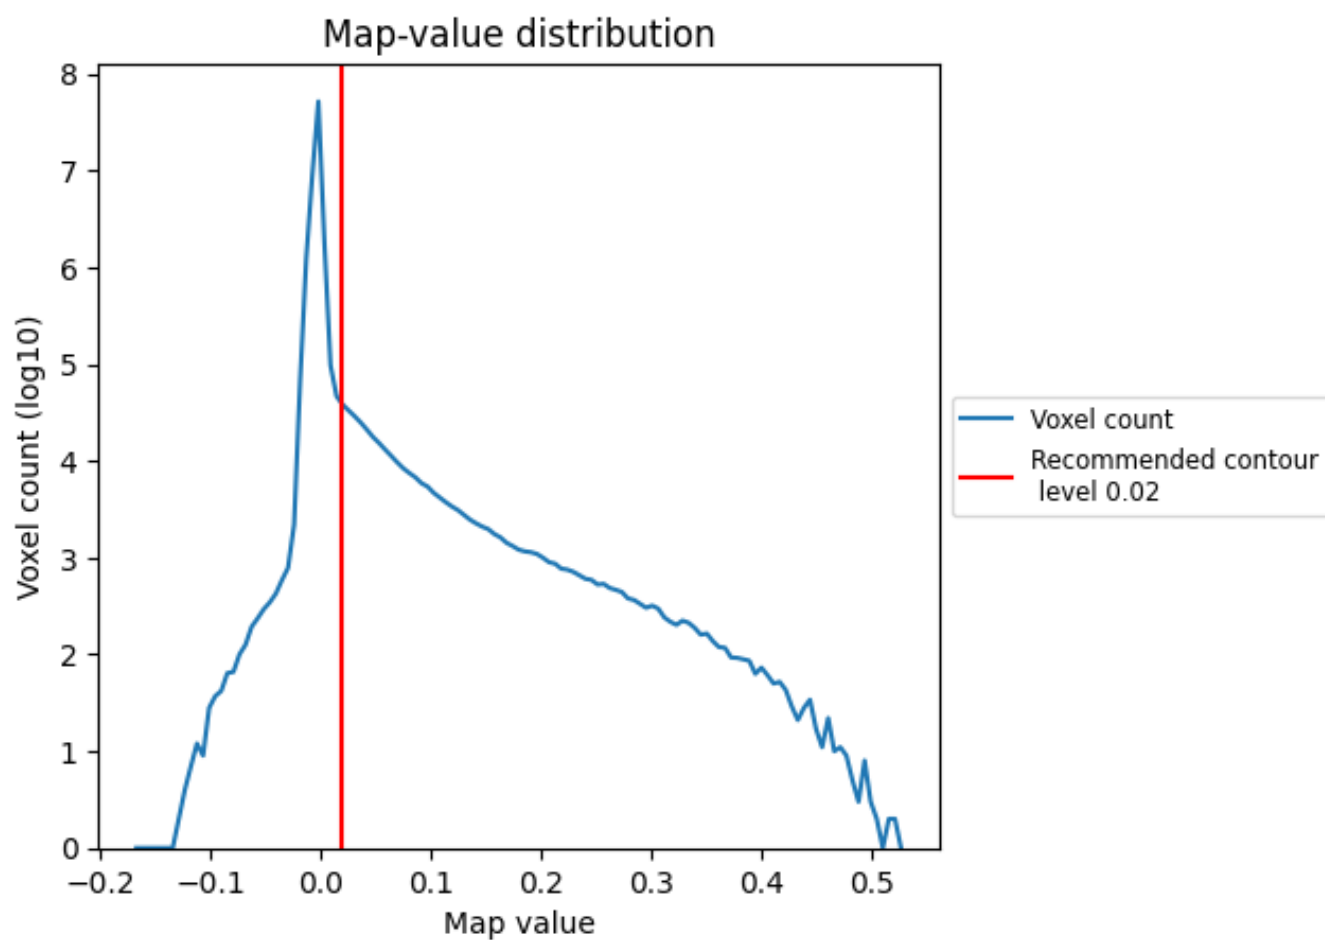

The map-value distribution is plotted in 128 intervals along the x-axis. The y-axis is logarithmic. A spike in this graph at zero usually indicates that the volume has been masked.

## 7.2 Volume estimate [i](#)

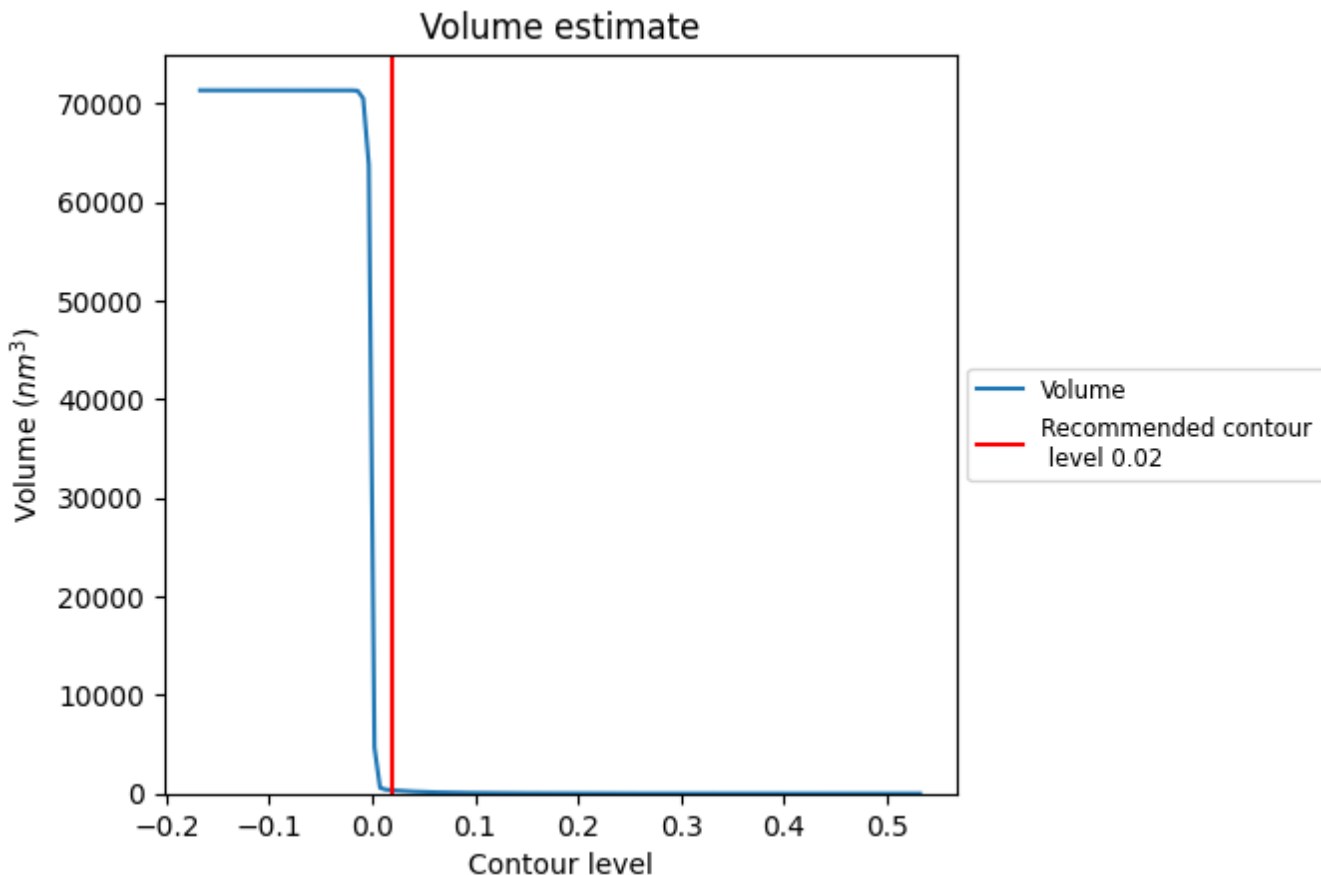

The volume at the recommended contour level is 338  $\text{nm}^3$ ; this corresponds to an approximate mass of 305 kDa.

The volume estimate graph shows how the enclosed volume varies with the contour level. The recommended contour level is shown as a vertical line and the intersection between the line and the curve gives the volume of the enclosed surface at the given level.

7.3 Rotationally averaged power spectrum 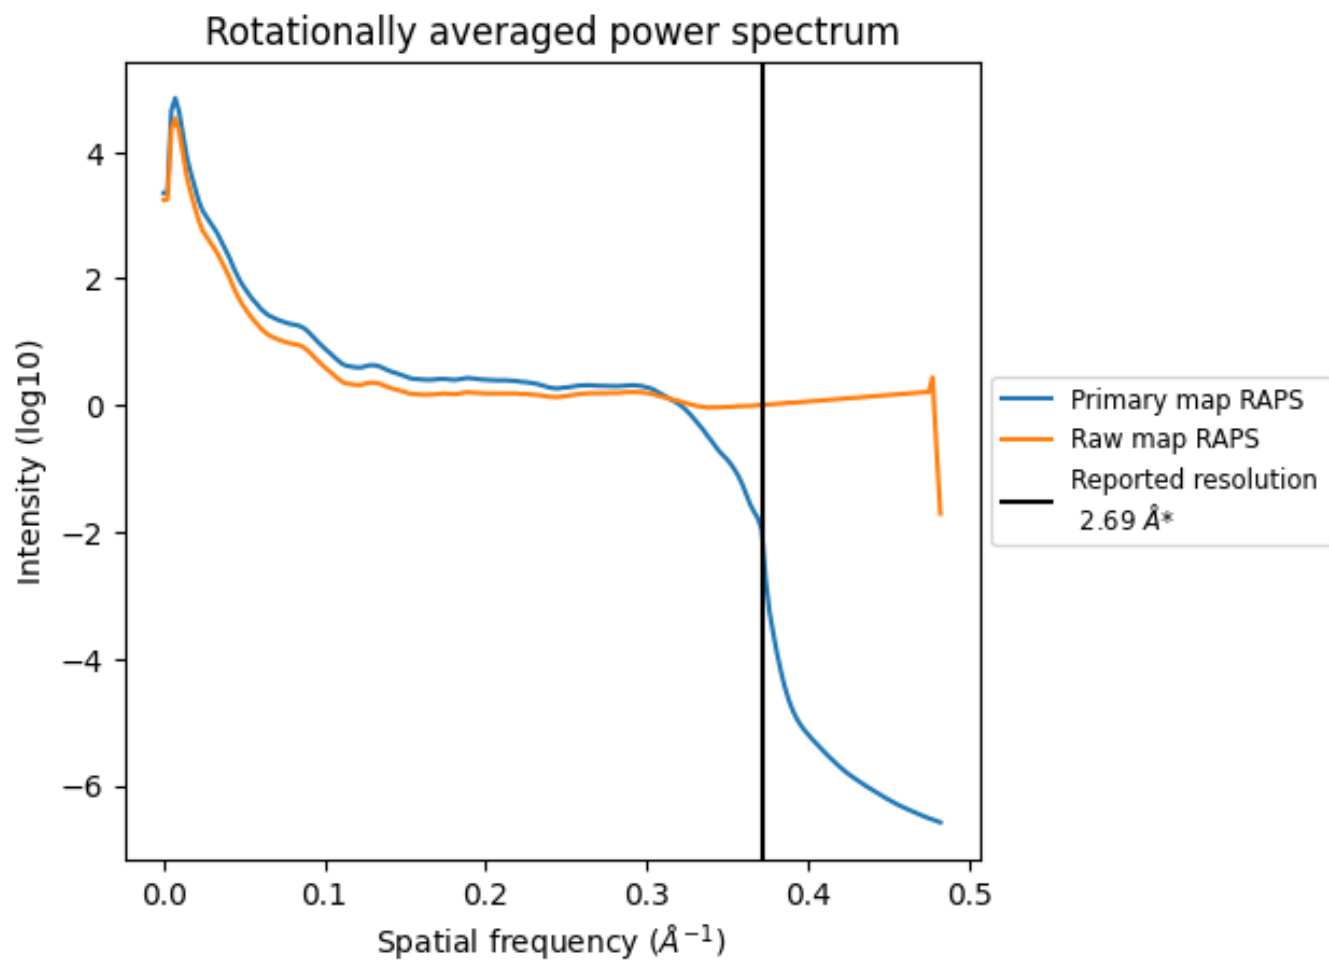

\*Reported resolution corresponds to spatial frequency of 0.372 Å<sup>-1</sup>

## 8 Fourier-Shell correlation [i](#)

Fourier-Shell Correlation (FSC) is the most commonly used method to estimate the resolution of single-particle and subtomogram-averaged maps. The shape of the curve depends on the imposed symmetry, mask and whether or not the two 3D reconstructions used were processed from a common reference. The reported resolution is shown as a black line. A curve is displayed for the half-bit criterion in addition to lines showing the 0.143 gold standard cut-off and 0.5 cut-off.

### 8.1 FSC [i](#)

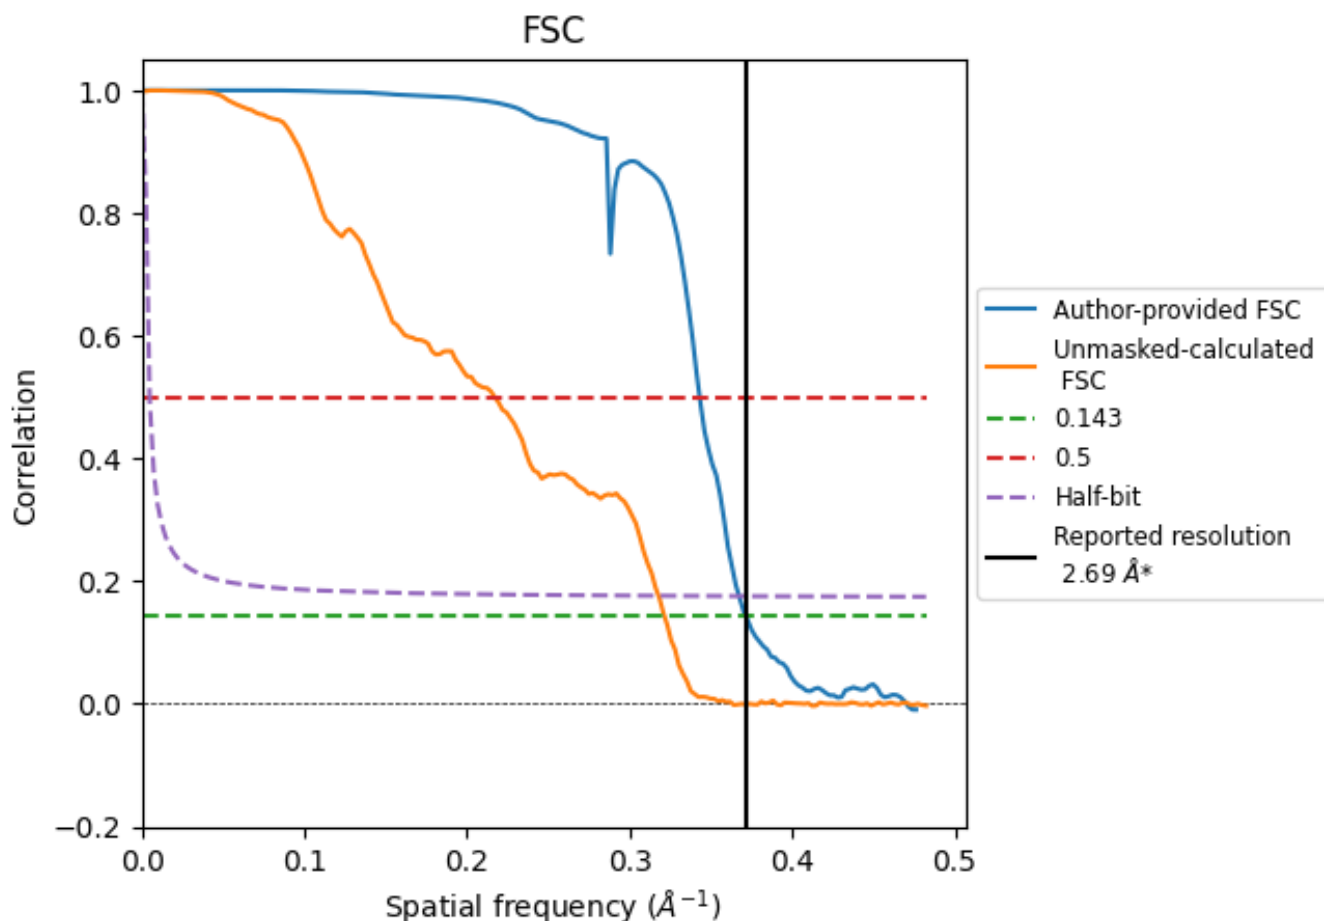

\*Reported resolution corresponds to spatial frequency of 0.372 Å<sup>-1</sup>

## 8.2 Resolution estimates [i](#)

| Resolution estimate (Å)   | Estimation criterion (FSC cut-off) |      |          |
|---------------------------|------------------------------------|------|----------|
|                           | 0.143                              | 0.5  | Half-bit |
| Reported by author        | 2.69                               | -    | -        |
| Author-provided FSC curve | 2.69                               | 2.91 | 2.72     |
| Unmasked-calculated*      | 3.11                               | 4.61 | 3.15     |

\*Resolution estimate based on FSC curve calculated by comparison of deposited half-maps. The value from deposited half-maps intersecting FSC 0.143 CUT-OFF 3.11 differs from the reported value 2.69 by more than 10 %

## 9 Map-model fit [i](#)

This section contains information regarding the fit between EMDB map EMD-70948 and PDB model 9OWY. Per-residue inclusion information can be found in section 3 on page 4.

### 9.1 Map-model overlay [i](#)

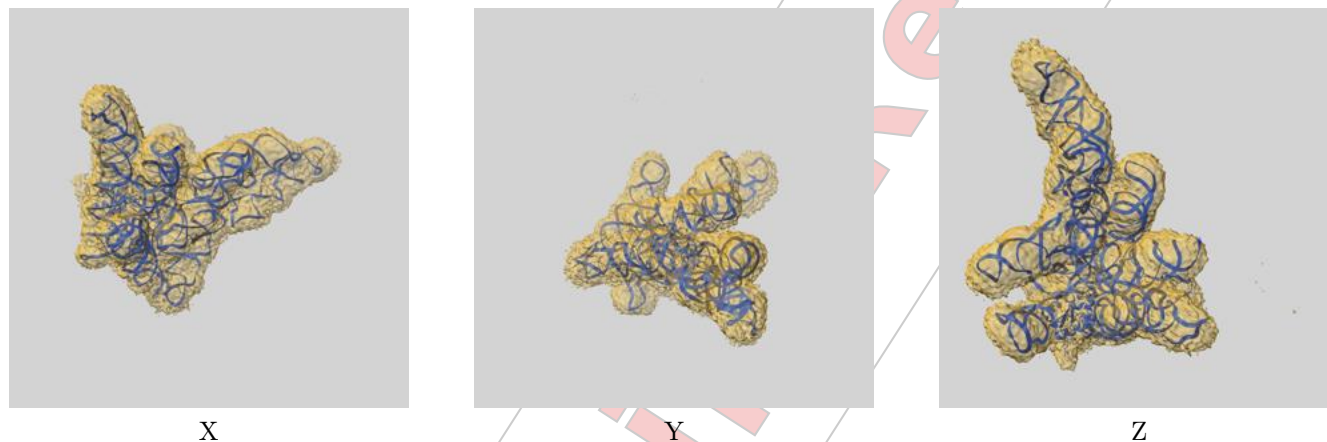

The images above show the 3D surface view of the map at the recommended contour level 0.02 at 50% transparency in yellow overlaid with a ribbon representation of the model coloured in blue. These images allow for the visual assessment of the quality of fit between the atomic model and the map.

## 9.2 Q-score mapped to coordinate model [\(i\)](#)

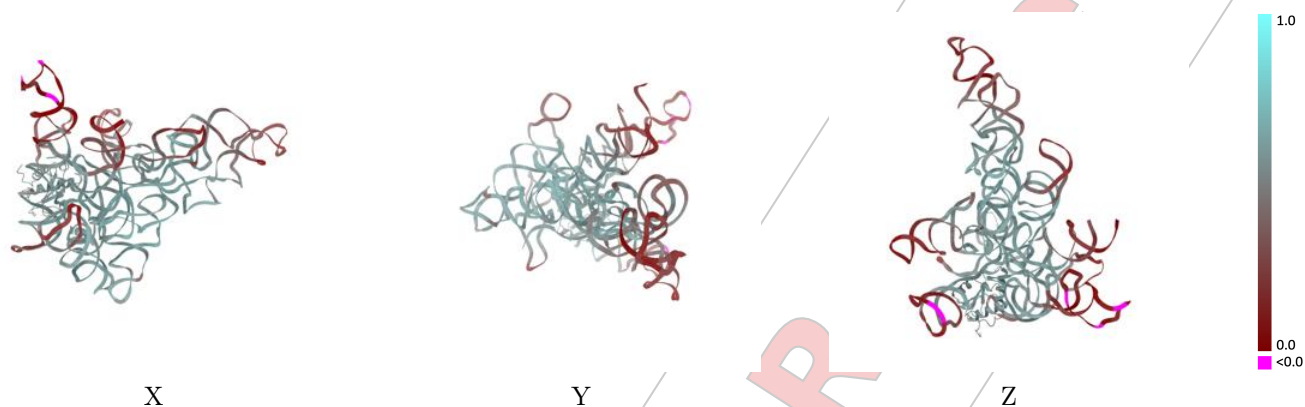

The images above show the model with each residue coloured according to its Q-score. This shows their resolvability in the map with higher Q-score values reflecting better resolvability. Please note: Q-score is calculating the resolvability of atoms, and thus high values are only expected at resolutions at which atoms can be resolved. Low Q-score values may therefore be expected for many entries.

## 9.3 Atom inclusion mapped to coordinate model [\(i\)](#)

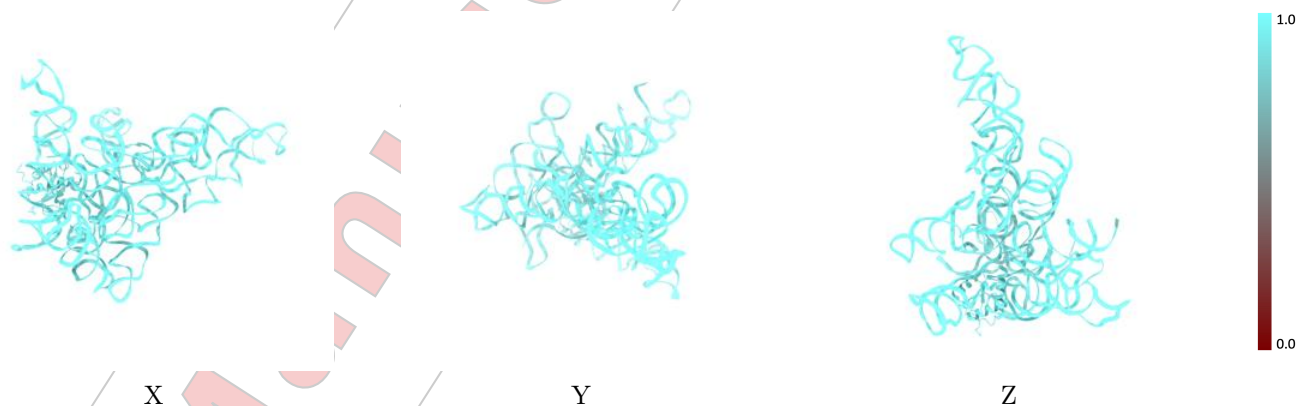

The images above show the model with each residue coloured according to its atom inclusion. This shows to what extent they are inside the map at the recommended contour level (0.02).

## 9.4 Atom inclusion [i](#)

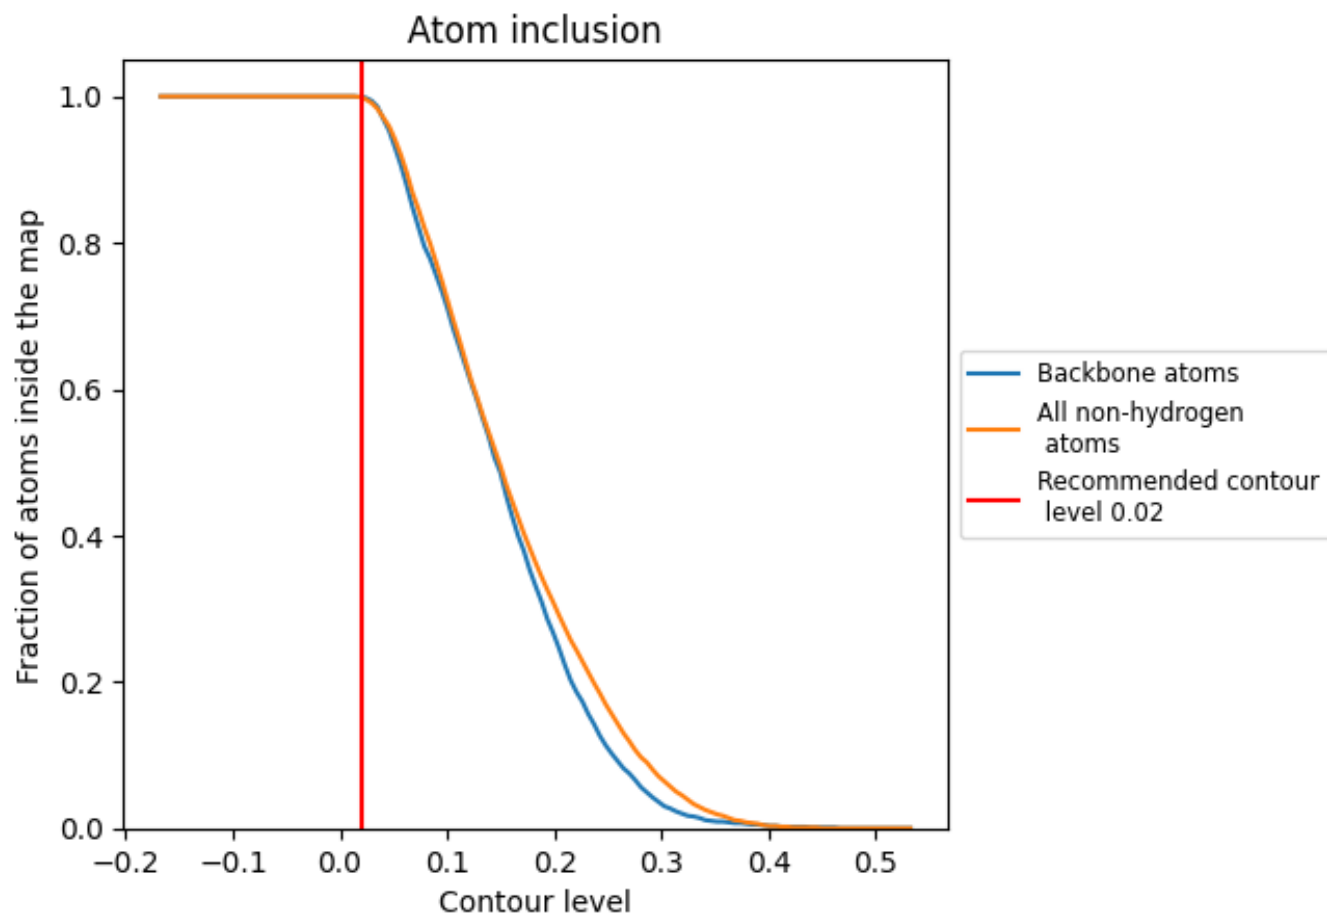

At the recommended contour level, 100% of all backbone atoms, 100% of all non-hydrogen atoms, are inside the map.

## 9.5 Map-model fit summary [i](#)

The table lists the average atom inclusion at the recommended contour level (0.02) and Q-score for the entire model and for each chain.

| Chain | Atom inclusion                                                                           | Q-score                                                                                  |
|-------|------------------------------------------------------------------------------------------|------------------------------------------------------------------------------------------|
| All   |  0.9990 |  0.4740 |
| A     |  0.9990 |  0.4760 |
| B     |  0.9980 |  0.5530 |
| C     |  0.9990 |  0.4310 |





# Full wwPDB EM Validation Report ⓘ

Jun 6, 2025 – 03:58 PM EDT

PDB ID : 9OY5 / pdb\_00009oy5  
EMDB ID : EMD-70997  
Title : Structure of Geobacillus stearotherophilus RNase P holoenzyme tetraloop mutant (sub-conformation 1)  
Deposited on : 2025-06-04  
Resolution : 3.02 Å (reported)  
Based on initial model : 2A64

**This wwPDB validation report is for manuscript review**

This is a Full wwPDB EM Validation Report.

This report is produced by the wwPDB biocuration pipeline after annotation of the structure.

We welcome your comments at [validation@mail.wwpdb.org](mailto:validation@mail.wwpdb.org)

A user guide is available at

<https://www.wwpdb.org/validation/2017/EMValidationReportHelp>

with specific help available everywhere you see the ⓘ symbol.

The types of validation reports are described at

<http://www.wwpdb.org/validation/2017/FAQs#types>.

---

The following versions of software and data (see [references ⓘ](#)) were used in the production of this report:

EMDB validation analysis : 0.0.1.dev118  
MolProbity : 4-5-2 with Phenix2.0rc1  
Percentile statistics : 20231227.v01 (using entries in the PDB archive December 27th 2023)  
MapQ : 1.9.13  
Ideal geometry (proteins) : Engh & Huber (2001)  
Ideal geometry (DNA, RNA) : Parkinson et al. (1996)  
Validation Pipeline (wwPDB-VP) : 2.43.1

# 1 Overall quality at a glance i

The following experimental techniques were used to determine the structure:  
*ELECTRON MICROSCOPY*

The reported resolution of this entry is 3.02 Å.

Percentile scores (ranging between 0-100) for global validation metrics of the entry are shown in the following graphic. The table shows the number of entries on which the scores are based.

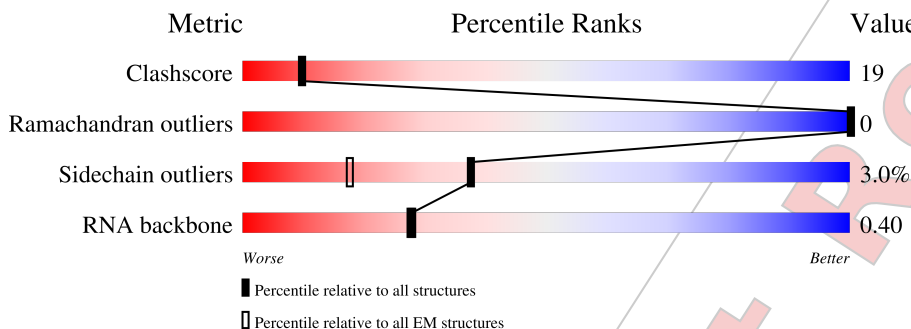

| Metric                | Whole archive (#Entries) | EM structures (#Entries) |
|-----------------------|--------------------------|--------------------------|
| Clashscore            | 210492                   | 15764                    |
| Ramachandran outliers | 207382                   | 16835                    |
| Sidechain outliers    | 206894                   | 16415                    |
| RNA backbone          | 6643                     | 2191                     |

The table below summarises the geometric issues observed across the polymeric chains and their fit to the map. The red, orange, yellow and green segments of the bar indicate the fraction of residues that contain outliers for  $\geq 3$ , 2, 1 and 0 types of geometric quality criteria respectively. A grey segment represents the fraction of residues that are not modelled. The numeric value for each fraction is indicated below the corresponding segment, with a dot representing fractions  $\leq 5\%$ . The upper red bar (where present) indicates the fraction of residues that have poor fit to the EM map (all-atom inclusion  $< 40\%$ ). The numeric value is given above the bar.

| Mol | Chain | Length | Quality of chain |
|-----|-------|--------|------------------|
| 1   | A     | 417    |                  |
| 2   | B     | 116    |                  |

## 2 Entry composition i

There are 3 unique types of molecules in this entry. The entry contains 9924 atoms, of which 0 are hydrogens and 0 are deuteriums.

In the tables below, the AltConf column contains the number of residues with at least one atom in alternate conformation and the Trace column contains the number of residues modelled with at most 2 atoms.

- Molecule 1 is a RNA chain called RNase P RNA component tetraloop mutant.

| Mol | Chain | Residues | Atoms |      |      |      |     | AltConf | Trace |
|-----|-------|----------|-------|------|------|------|-----|---------|-------|
|     |       |          | Total | C    | N    | O    | P   |         |       |
| 1   | A     | 417      | 8953  | 3992 | 1648 | 2896 | 417 | 0       | 0     |

There are 6 discrepancies between the modelled and reference sequences:

| Chain | Residue | Modelled | Actual | Comment             | Reference |
|-------|---------|----------|--------|---------------------|-----------|
| A     | 126     | U        | C      | conflict            | GB 143442 |
| A     | 215     | U        | G      | engineered mutation | GB 143442 |
| A     | 216     | U        | A      | engineered mutation | GB 143442 |
| A     | 217     | U        | A      | engineered mutation | GB 143442 |
| A     | 218     | U        | A      | engineered mutation | GB 143442 |
| A     | 417     | C        | G      | conflict            | GB 143442 |

- Molecule 2 is a protein called Ribonuclease P protein component.

| Mol | Chain | Residues | Atoms |     |     |     |   | AltConf | Trace |
|-----|-------|----------|-------|-----|-----|-----|---|---------|-------|
|     |       |          | Total | C   | N   | O   | S |         |       |
| 2   | B     | 116      | 947   | 608 | 174 | 162 | 3 | 0       | 0     |

There are 2 discrepancies between the modelled and reference sequences:

| Chain | Residue | Modelled | Actual | Comment        | Reference      |
|-------|---------|----------|--------|----------------|----------------|
| B     | 0       | GLY      | -      | expression tag | UNP A0A150N245 |
| B     | 64      | ILE      | VAL    | conflict       | UNP A0A150N245 |

- Molecule 3 is CALCIUM ION (CCD ID: CA) (formula: Ca) (labeled as "Ligand of Interest" by depositor).

| Mol | Chain | Residues | Atoms |    | AltConf |
|-----|-------|----------|-------|----|---------|
| 3   | A     | 24       | Total | Ca | 0       |
|     |       |          | 24    | 24 |         |

### 3 Residue-property plots

These plots are drawn for all protein, RNA, DNA and oligosaccharide chains in the entry. The first graphic for a chain summarises the proportions of the various outlier classes displayed in the second graphic. The second graphic shows the sequence view annotated by issues in geometry and atom inclusion in map density. Residues are color-coded according to the number of geometric quality criteria for which they contain at least one outlier: green = 0, yellow = 1, orange = 2 and red = 3 or more. A red diamond above a residue indicates a poor fit to the EM map for this residue (all-atom inclusion < 40%). Stretches of 2 or more consecutive residues without any outlier are shown as a green connector. Residues present in the sample, but not in the model, are shown in grey.

- Molecule 1: RNase P RNA component tetraloop mutant

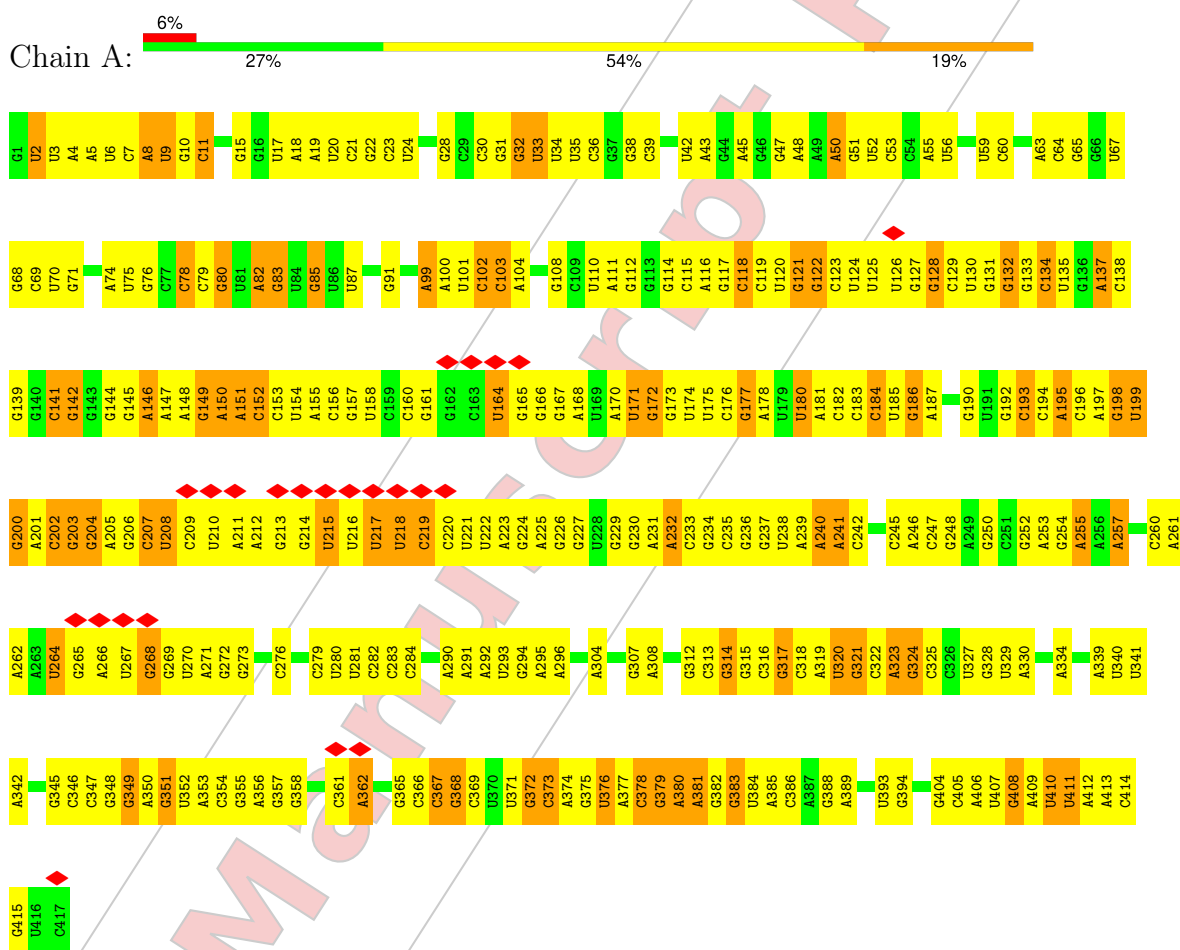

- Molecule 2: Ribonuclease P protein component

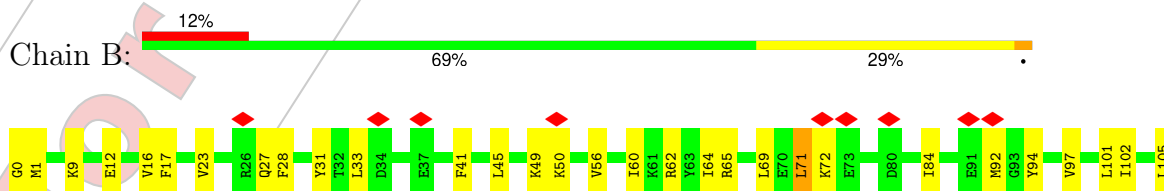

|      |      |      |      |      |      |      |      |      |      |
|------|------|------|------|------|------|------|------|------|------|
| R106 | R107 | A108 | G109 | G110 | L111 | K112 | K113 | E114 | A115 |
|------|------|------|------|------|------|------|------|------|------|

For Manuscript Review

## 4 Experimental information i

| Property                             | Value                                   | Source    |
|--------------------------------------|-----------------------------------------|-----------|
| EM reconstruction method             | SINGLE PARTICLE                         | Depositor |
| Imposed symmetry                     | POINT, Not provided                     |           |
| Number of particles used             | 133224                                  | Depositor |
| Resolution determination method      | FSC 0.143 CUT-OFF                       | Depositor |
| CTF correction method                | PHASE FLIPPING AND AMPLITUDE CORRECTION | Depositor |
| Microscope                           | FEI TALOS ARCTICA                       | Depositor |
| Voltage (kV)                         | 200                                     | Depositor |
| Electron dose ( $e^-/\text{\AA}^2$ ) | 57                                      | Depositor |
| Minimum defocus (nm)                 | 500                                     | Depositor |
| Maximum defocus (nm)                 | 1500                                    | Depositor |
| Magnification                        | Not provided                            |           |
| Image detector                       | GATAN K3 BIOQUANTUM (6k x 4k)           | Depositor |
| Maximum map value                    | 0.547                                   | Depositor |
| Minimum map value                    | -0.148                                  | Depositor |
| Average map value                    | -0.000                                  | Depositor |
| Map value standard deviation         | 0.006                                   | Depositor |
| Recommended contour level            | 0.04                                    | Depositor |
| Map size (Å)                         | 414.72, 414.72, 414.72                  | wwPDB     |
| Map dimensions                       | 400, 400, 400                           | wwPDB     |
| Map angles (°)                       | 90.0, 90.0, 90.0                        | wwPDB     |
| Pixel spacing (Å)                    | 1.0368, 1.0368, 1.0368                  | Depositor |

## 5 Model quality [i](#)

### 5.1 Standard geometry [i](#)

Bond lengths and bond angles in the following residue types are not validated in this section: CA

The Z score for a bond length (or angle) is the number of standard deviations the observed value is removed from the expected value. A bond length (or angle) with  $|Z| > 5$  is considered an outlier worth inspection. RMSZ is the root-mean-square of all Z scores of the bond lengths (or angles).

| Mol | Chain | Bond lengths |                | Bond angles |         |
|-----|-------|--------------|----------------|-------------|---------|
|     |       | RMSZ         | # Z  >5        | RMSZ        | # Z  >5 |
| 1   | A     | 0.28         | 4/10025 (0.0%) | 0.43        | 0/15639 |
| 2   | B     | 0.19         | 0/962          | 0.44        | 0/1281  |
| All | All   | 0.27         | 4/10987 (0.0%) | 0.43        | 0/16920 |

All (4) bond length outliers are listed below:

| Mol | Chain | Res | Type | Atoms  | Z    | Observed(Å) | Ideal(Å) |
|-----|-------|-----|------|--------|------|-------------|----------|
| 1   | A     | 216 | U    | C1'-N1 | 6.37 | 1.58        | 1.48     |
| 1   | A     | 218 | U    | C1'-N1 | 6.37 | 1.58        | 1.48     |
| 1   | A     | 217 | U    | C1'-N1 | 6.31 | 1.57        | 1.48     |
| 1   | A     | 215 | U    | C1'-N1 | 5.57 | 1.56        | 1.48     |

There are no bond angle outliers.

There are no chirality outliers.

There are no planarity outliers.

### 5.2 Too-close contacts [i](#)

In the following table, the Non-H and H(model) columns list the number of non-hydrogen atoms and hydrogen atoms in the chain respectively. The H(added) column lists the number of hydrogen atoms added and optimized by MolProbity. The Clashes column lists the number of clashes within the asymmetric unit, whereas Symm-Clashes lists symmetry-related clashes.

| Mol | Chain | Non-H | H(model) | H(added) | Clashes | Symm-Clashes |
|-----|-------|-------|----------|----------|---------|--------------|
| 1   | A     | 8953  | 0        | 4505     | 265     | 0            |
| 2   | B     | 947   | 0        | 1008     | 25      | 0            |
| 3   | A     | 24    | 0        | 0        | 0       | 0            |
| All | All   | 9924  | 0        | 5513     | 289     | 0            |

The all-atom clashscore is defined as the number of clashes found per 1000 atoms (including hydrogen atoms). The all-atom clashscore for this structure is 19.

All (289) close contacts within the same asymmetric unit are listed below, sorted by their clash magnitude.

| Atom-1           | Atom-2           | Interatomic distance (Å) | Clash overlap (Å) |
|------------------|------------------|--------------------------|-------------------|
| 1:A:314:G:H1     | 1:A:323:A:H61    | 1.04                     | 0.90              |
| 1:A:350:A:H1'    | 1:A:380:A:C6     | 2.09                     | 0.87              |
| 1:A:371:U:H5''   | 1:A:372:G:H5'    | 1.58                     | 0.83              |
| 2:B:50:LYS:H     | 2:B:50:LYS:HD2   | 1.43                     | 0.83              |
| 1:A:158:U:H3     | 1:A:168:A:H61    | 1.25                     | 0.82              |
| 1:A:314:G:H1     | 1:A:323:A:N6     | 1.75                     | 0.82              |
| 1:A:316:C:H2'    | 1:A:317:G:C8     | 2.19                     | 0.76              |
| 1:A:120:U:H3     | 1:A:131:G:H1     | 1.33                     | 0.76              |
| 1:A:348:G:N2     | 1:A:380:A:N7     | 2.35                     | 0.75              |
| 1:A:200:G:O6     | 1:A:231:A:N1     | 2.19                     | 0.74              |
| 1:A:290:A:H61    | 1:A:295:A:H3'    | 1.50                     | 0.73              |
| 2:B:105:LEU:HD23 | 2:B:111:LEU:HD23 | 1.72                     | 0.72              |
| 1:A:349:G:H21    | 1:A:350:A:H62    | 1.39                     | 0.70              |
| 2:B:0:GLY:HA3    | 2:B:65:ARG:HB3   | 1.72                     | 0.70              |
| 1:A:141:C:H42    | 1:A:241:A:H62    | 1.39                     | 0.70              |
| 2:B:27:GLN:HG2   | 2:B:92:MET:HE1   | 1.75                     | 0.67              |
| 1:A:180:U:H2'    | 1:A:181:A:H8     | 1.57                     | 0.67              |
| 1:A:215:U:H2'    | 1:A:217:U:H5     | 1.62                     | 0.65              |
| 1:A:18:A:H2'     | 1:A:19:A:H8      | 1.61                     | 0.65              |
| 1:A:9:U:H2'      | 1:A:10:G:H8      | 1.62                     | 0.65              |
| 1:A:211:A:H2'    | 1:A:212:A:C8     | 2.31                     | 0.64              |
| 1:A:352:U:H2'    | 1:A:353:A:H8     | 1.63                     | 0.64              |
| 1:A:374:A:H2'    | 1:A:375:G:C8     | 2.33                     | 0.64              |
| 1:A:148:A:H61    | 1:A:177:G:H1'    | 1.64                     | 0.62              |
| 1:A:130:U:H2'    | 1:A:131:G:H8     | 1.64                     | 0.62              |
| 1:A:115:C:H2'    | 1:A:116:A:H8     | 1.63                     | 0.62              |
| 1:A:148:A:N6     | 1:A:177:G:H1'    | 2.13                     | 0.62              |
| 1:A:204:G:H2'    | 1:A:205:A:H8     | 1.63                     | 0.62              |
| 1:A:172:G:H2'    | 1:A:173:G:H8     | 1.65                     | 0.62              |
| 1:A:211:A:H2'    | 1:A:212:A:H8     | 1.65                     | 0.61              |
| 1:A:9:U:H2'      | 1:A:10:G:C8      | 2.34                     | 0.61              |
| 1:A:199:U:H2'    | 1:A:200:G:C8     | 2.36                     | 0.61              |
| 1:A:316:C:H2'    | 1:A:317:G:N7     | 2.14                     | 0.61              |
| 1:A:379:G:C5'    | 1:A:380:A:H5''   | 2.30                     | 0.61              |
| 1:A:411:U:H2'    | 1:A:412:A:C8     | 2.36                     | 0.61              |
| 1:A:352:U:H2'    | 1:A:353:A:C8     | 2.35                     | 0.60              |
| 1:A:349:G:H1     | 1:A:379:G:H1'    | 1.66                     | 0.60              |

Continued on next page...

*Continued from previous page...*

| Atom-1          | Atom-2          | Interatomic distance (Å) | Clash overlap (Å) |
|-----------------|-----------------|--------------------------|-------------------|
| 1:A:18:A:H2'    | 1:A:19:A:C8     | 2.37                     | 0.60              |
| 1:A:315:G:H2'   | 1:A:316:C:C6    | 2.37                     | 0.59              |
| 1:A:70:U:H2'    | 1:A:71:G:O4'    | 2.02                     | 0.59              |
| 1:A:130:U:H2'   | 1:A:131:G:C8    | 2.38                     | 0.59              |
| 1:A:99:A:H2'    | 1:A:100:A:C8    | 2.38                     | 0.59              |
| 1:A:219:C:H2'   | 1:A:220:C:C6    | 2.38                     | 0.59              |
| 1:A:349:G:H22   | 1:A:379:G:C1'   | 2.16                     | 0.59              |
| 1:A:195:A:H2'   | 1:A:196:C:C6    | 2.38                     | 0.59              |
| 1:A:376:U:C2    | 1:A:377:A:C8    | 2.90                     | 0.58              |
| 2:B:56:VAL:O    | 2:B:60:ILE:HG13 | 2.03                     | 0.58              |
| 1:A:85:G:O2'    | 1:A:87:U:O4     | 2.21                     | 0.58              |
| 1:A:201:A:H61   | 1:A:230:G:H1    | 1.50                     | 0.58              |
| 1:A:204:G:H2'   | 1:A:205:A:C8    | 2.37                     | 0.58              |
| 1:A:373:C:H2'   | 1:A:374:A:H8    | 1.67                     | 0.58              |
| 1:A:71:G:H1'    | 1:A:291:A:H61   | 1.69                     | 0.58              |
| 1:A:146:A:H3'   | 1:A:178:A:H61   | 1.68                     | 0.58              |
| 1:A:378:C:H3'   | 1:A:379:G:H8    | 1.69                     | 0.58              |
| 1:A:293:U:H3'   | 1:A:294:G:C8    | 2.39                     | 0.58              |
| 1:A:172:G:H2'   | 1:A:173:G:C8    | 2.39                     | 0.57              |
| 1:A:124:U:H2'   | 1:A:125:U:O4'   | 2.03                     | 0.57              |
| 1:A:45:A:H62    | 2:B:62:ARG:NH2  | 2.03                     | 0.57              |
| 1:A:137:A:H3'   | 1:A:240:A:H62   | 1.69                     | 0.57              |
| 1:A:272:G:H2'   | 1:A:273:G:H8    | 1.69                     | 0.57              |
| 1:A:215:U:O2'   | 1:A:217:U:O4    | 2.16                     | 0.57              |
| 1:A:220:C:H2'   | 1:A:221:U:C6    | 2.40                     | 0.56              |
| 1:A:102:C:H2'   | 1:A:103:C:O4'   | 2.05                     | 0.56              |
| 1:A:121:G:H1    | 1:A:130:U:H3    | 1.53                     | 0.56              |
| 1:A:210:U:H2'   | 1:A:211:A:C8    | 2.40                     | 0.56              |
| 1:A:367:C:H2'   | 1:A:368:G:C8    | 2.40                     | 0.56              |
| 1:A:411:U:H2'   | 1:A:412:A:H8    | 1.70                     | 0.56              |
| 1:A:323:A:H2'   | 1:A:324:G:H5'   | 1.88                     | 0.56              |
| 1:A:197:A:H2'   | 1:A:199:U:C6    | 2.41                     | 0.56              |
| 1:A:151:A:H2'   | 1:A:152:C:O4'   | 2.05                     | 0.55              |
| 1:A:341:U:H2'   | 1:A:342:A:H8    | 1.70                     | 0.55              |
| 1:A:373:C:H2'   | 1:A:374:A:C8    | 2.42                     | 0.55              |
| 1:A:141:C:H5'   | 1:A:239:A:H61   | 1.71                     | 0.55              |
| 2:B:112:LYS:HB2 | 2:B:114:GLU:HG2 | 1.88                     | 0.55              |
| 1:A:379:G:C4'   | 1:A:380:A:H5''  | 2.37                     | 0.55              |
| 1:A:174:U:H2'   | 1:A:175:U:C6    | 2.42                     | 0.55              |
| 1:A:3:U:H2'     | 1:A:4:A:C8      | 2.42                     | 0.54              |
| 1:A:194:C:C2    | 1:A:195:A:H1'   | 2.43                     | 0.54              |

*Continued on next page...*

Continued from previous page...

| Atom-1         | Atom-2         | Interatomic distance (Å) | Clash overlap (Å) |
|----------------|----------------|--------------------------|-------------------|
| 1:A:115:C:H2'  | 1:A:116:A:C8   | 2.42                     | 0.54              |
| 1:A:3:U:H2'    | 1:A:4:A:H8     | 1.72                     | 0.54              |
| 1:A:175:U:H2'  | 1:A:176:C:C6   | 2.44                     | 0.53              |
| 1:A:245:C:H2'  | 1:A:246:A:H8   | 1.74                     | 0.53              |
| 1:A:59:U:H2'   | 1:A:60:C:C6    | 2.44                     | 0.53              |
| 1:A:141:C:H4'  | 1:A:142:G:H5'' | 1.90                     | 0.53              |
| 1:A:206:G:H3'  | 1:A:207:C:H5'' | 1.89                     | 0.53              |
| 1:A:281:U:H2'  | 1:A:282:C:H6   | 1.74                     | 0.53              |
| 1:A:380:A:H3'  | 1:A:381:A:H8   | 1.74                     | 0.52              |
| 1:A:6:U:H2'    | 1:A:7:C:C6     | 2.44                     | 0.52              |
| 1:A:214:G:H2'  | 1:A:215:U:H6   | 1.73                     | 0.52              |
| 1:A:380:A:C6   | 1:A:381:A:C4   | 2.97                     | 0.52              |
| 1:A:176:C:H2'  | 1:A:177:G:H5'  | 1.91                     | 0.52              |
| 1:A:208:U:H2'  | 1:A:209:C:C6   | 2.44                     | 0.52              |
| 1:A:215:U:O2   | 1:A:218:U:O4   | 2.28                     | 0.52              |
| 1:A:110:U:H2'  | 1:A:111:A:H8   | 1.75                     | 0.52              |
| 1:A:381:A:H2'  | 1:A:382:G:O4'  | 2.09                     | 0.52              |
| 1:A:193:C:H2'  | 1:A:194:C:C6   | 2.44                     | 0.52              |
| 1:A:377:A:H3'  | 1:A:378:C:H6   | 1.75                     | 0.51              |
| 1:A:5:A:H2'    | 1:A:6:U:C6     | 2.45                     | 0.51              |
| 1:A:218:U:O5'  | 1:A:218:U:H6   | 1.94                     | 0.51              |
| 1:A:82:A:H2'   | 1:A:83:G:O4'   | 2.10                     | 0.51              |
| 1:A:200:G:H1   | 1:A:231:A:H2   | 1.58                     | 0.51              |
| 1:A:262:A:H2   | 1:A:270:U:H3   | 1.56                     | 0.51              |
| 1:A:120:U:H2'  | 1:A:121:G:C8   | 2.45                     | 0.51              |
| 1:A:293:U:H3'  | 1:A:294:G:H8   | 1.76                     | 0.51              |
| 1:A:324:G:H2'  | 1:A:325:C:H6   | 1.75                     | 0.51              |
| 1:A:350:A:C5   | 1:A:380:A:C8   | 2.98                     | 0.50              |
| 1:A:412:A:H2'  | 1:A:413:A:C8   | 2.46                     | 0.50              |
| 1:A:42:U:H2'   | 1:A:43:A:C8    | 2.47                     | 0.50              |
| 1:A:10:G:H2'   | 1:A:11:C:H6    | 1.76                     | 0.50              |
| 1:A:166:G:H2'  | 1:A:167:G:C8   | 2.46                     | 0.50              |
| 1:A:341:U:H2'  | 1:A:342:A:C8   | 2.47                     | 0.50              |
| 1:A:197:A:H4'  | 1:A:198:G:C8   | 2.47                     | 0.50              |
| 1:A:407:U:H2'  | 1:A:408:G:C8   | 2.46                     | 0.50              |
| 1:A:408:G:H2'  | 1:A:409:A:H8   | 1.77                     | 0.50              |
| 1:A:69:C:H2'   | 1:A:70:U:C6    | 2.46                     | 0.50              |
| 1:A:379:G:H4'  | 1:A:380:A:H5'' | 1.92                     | 0.50              |
| 2:B:49:LYS:HD3 | 2:B:49:LYS:N   | 2.27                     | 0.50              |
| 1:A:19:A:H2'   | 1:A:20:U:C6    | 2.46                     | 0.49              |
| 1:A:321:G:H2'  | 1:A:322:C:O4'  | 2.13                     | 0.49              |

Continued on next page...

Continued from previous page...

| Atom-1          | Atom-2           | Interatomic distance (Å) | Clash overlap (Å) |
|-----------------|------------------|--------------------------|-------------------|
| 1:A:10:G:H2'    | 1:A:11:C:C6      | 2.48                     | 0.49              |
| 1:A:167:G:H2'   | 1:A:168:A:C8     | 2.47                     | 0.49              |
| 1:A:210:U:H2'   | 1:A:211:A:H8     | 1.78                     | 0.49              |
| 1:A:215:U:H2'   | 1:A:217:U:C5     | 2.45                     | 0.49              |
| 1:A:128:G:H2'   | 1:A:129:C:C6     | 2.48                     | 0.49              |
| 1:A:6:U:H2'     | 1:A:7:C:H6       | 1.76                     | 0.49              |
| 1:A:111:A:H2'   | 1:A:112:G:H8     | 1.78                     | 0.49              |
| 1:A:382:G:H2'   | 1:A:383:G:O4'    | 2.13                     | 0.49              |
| 1:A:144:G:H2'   | 1:A:145:G:O4'    | 2.13                     | 0.48              |
| 1:A:374:A:H2'   | 1:A:375:G:H8     | 1.76                     | 0.48              |
| 1:A:110:U:H2'   | 1:A:111:A:C8     | 2.47                     | 0.48              |
| 2:B:50:LYS:H    | 2:B:50:LYS:CD    | 2.20                     | 0.48              |
| 1:A:55:A:H2'    | 1:A:56:U:C6      | 2.49                     | 0.48              |
| 1:A:196:C:H2'   | 1:A:197:A:C8     | 2.48                     | 0.48              |
| 1:A:314:G:C2    | 1:A:315:G:N7     | 2.81                     | 0.48              |
| 1:A:17:U:H2'    | 1:A:18:A:H8      | 1.79                     | 0.48              |
| 1:A:121:G:C6    | 1:A:131:G:C6     | 3.02                     | 0.48              |
| 1:A:346:C:H2'   | 1:A:347:C:H6     | 1.79                     | 0.48              |
| 2:B:64:ILE:HG23 | 2:B:101:LEU:HD21 | 1.96                     | 0.48              |
| 1:A:349:G:N1    | 1:A:379:G:H1'    | 2.28                     | 0.47              |
| 1:A:349:G:N2    | 1:A:379:G:O4'    | 2.42                     | 0.47              |
| 2:B:94:TYR:HA   | 2:B:97:VAL:HG12  | 1.95                     | 0.47              |
| 1:A:121:G:H3'   | 1:A:122:G:H8     | 1.79                     | 0.47              |
| 1:A:147:A:H2'   | 1:A:148:A:C8     | 2.49                     | 0.47              |
| 1:A:166:G:H2'   | 1:A:167:G:H8     | 1.79                     | 0.47              |
| 1:A:183:C:H2'   | 1:A:184:C:C6     | 2.49                     | 0.47              |
| 1:A:71:G:H1'    | 1:A:291:A:N6     | 2.30                     | 0.47              |
| 1:A:355:G:H21   | 1:A:373:C:H42    | 1.62                     | 0.47              |
| 1:A:412:A:H2'   | 1:A:413:A:H8     | 1.79                     | 0.47              |
| 1:A:173:G:H2'   | 1:A:174:U:C6     | 2.49                     | 0.47              |
| 1:A:201:A:N6    | 1:A:230:G:H1     | 2.10                     | 0.47              |
| 1:A:384:U:H5''  | 1:A:385:A:OP1    | 2.15                     | 0.47              |
| 1:A:209:C:H2'   | 1:A:210:U:C6     | 2.50                     | 0.47              |
| 1:A:64:C:O2     | 1:A:82:A:N6      | 2.49                     | 0.46              |
| 1:A:111:A:H2'   | 1:A:112:G:C8     | 2.50                     | 0.46              |
| 1:A:307:G:H2'   | 1:A:308:A:H8     | 1.80                     | 0.46              |
| 1:A:149:G:H3'   | 1:A:150:A:H8     | 1.81                     | 0.46              |
| 1:A:229:G:H2'   | 1:A:230:G:C8     | 2.50                     | 0.46              |
| 1:A:280:U:H2'   | 1:A:281:U:H6     | 1.78                     | 0.46              |
| 1:A:119:C:H2'   | 1:A:120:U:H6     | 1.81                     | 0.46              |
| 1:A:156:C:O2'   | 1:A:157:G:H8     | 1.99                     | 0.46              |

Continued on next page...

Continued from previous page...

| Atom-1          | Atom-2           | Interatomic distance (Å) | Clash overlap (Å) |
|-----------------|------------------|--------------------------|-------------------|
| 1:A:23:C:H2'    | 1:A:24:U:C6      | 2.50                     | 0.46              |
| 1:A:247:C:H2'   | 1:A:248:G:H8     | 1.81                     | 0.46              |
| 1:A:378:C:H3'   | 1:A:379:G:C8     | 2.50                     | 0.46              |
| 1:A:324:G:H2'   | 1:A:325:C:C6     | 2.50                     | 0.46              |
| 1:A:383:G:H5''  | 1:A:384:U:OP2    | 2.16                     | 0.46              |
| 1:A:223:A:H2'   | 1:A:224:G:C8     | 2.51                     | 0.46              |
| 1:A:118:C:H2'   | 1:A:119:C:C6     | 2.50                     | 0.46              |
| 1:A:280:U:H2'   | 1:A:281:U:C6     | 2.51                     | 0.46              |
| 1:A:339:A:H2'   | 1:A:340:U:C6     | 2.51                     | 0.46              |
| 1:A:198:G:H1    | 1:A:235:C:H1'    | 1.80                     | 0.46              |
| 2:B:16:VAL:HG12 | 2:B:31:TYR:HB3   | 1.97                     | 0.46              |
| 1:A:208:U:H2'   | 1:A:209:C:H6     | 1.79                     | 0.46              |
| 1:A:155:A:H2'   | 1:A:156:C:O4'    | 2.16                     | 0.45              |
| 2:B:71:LEU:HD22 | 2:B:102:ILE:HD11 | 1.98                     | 0.45              |
| 2:B:106:ARG:HG2 | 2:B:111:LEU:HB3  | 1.97                     | 0.45              |
| 1:A:79:C:H2'    | 1:A:80:G:O4'     | 2.16                     | 0.45              |
| 2:B:23:VAL:HG21 | 2:B:108:ALA:HA   | 1.97                     | 0.45              |
| 1:A:19:A:H2'    | 1:A:20:U:H6      | 1.81                     | 0.45              |
| 1:A:313:C:H2'   | 1:A:314:G:C8     | 2.51                     | 0.45              |
| 1:A:315:G:C2    | 1:A:316:C:C4     | 3.05                     | 0.45              |
| 1:A:114:G:H2'   | 1:A:115:C:H6     | 1.81                     | 0.45              |
| 1:A:131:G:H2'   | 1:A:132:G:O4'    | 2.17                     | 0.45              |
| 2:B:50:LYS:HD2  | 2:B:50:LYS:N     | 2.22                     | 0.45              |
| 1:A:319:A:H1'   | 1:A:320:U:C5     | 2.52                     | 0.45              |
| 2:B:113:LYS:HE2 | 2:B:113:LYS:HB2  | 1.60                     | 0.45              |
| 1:A:281:U:H2'   | 1:A:282:C:C6     | 2.52                     | 0.45              |
| 1:A:357:G:H2'   | 1:A:358:G:H8     | 1.82                     | 0.45              |
| 1:A:393:U:H2'   | 1:A:394:G:C8     | 2.52                     | 0.45              |
| 1:A:356:A:H3'   | 1:A:357:G:H8     | 1.82                     | 0.45              |
| 1:A:377:A:C2    | 1:A:378:C:H1'    | 2.52                     | 0.45              |
| 1:A:410:U:C2    | 1:A:411:U:C5     | 3.04                     | 0.45              |
| 2:B:16:VAL:HA   | 2:B:33:LEU:HD22  | 1.99                     | 0.45              |
| 1:A:186:G:H5'   | 1:A:187:A:OP2    | 2.16                     | 0.45              |
| 1:A:153:C:H2'   | 1:A:154:U:C6     | 2.52                     | 0.45              |
| 1:A:282:C:H2'   | 1:A:283:C:H6     | 1.82                     | 0.45              |
| 1:A:32:G:H3'    | 1:A:33:U:C6      | 2.52                     | 0.44              |
| 1:A:317:G:O6    | 1:A:321:G:C2     | 2.70                     | 0.44              |
| 1:A:31:G:C2     | 1:A:32:G:C8      | 3.05                     | 0.44              |
| 1:A:64:C:H2'    | 1:A:65:G:H8      | 1.83                     | 0.44              |
| 1:A:232:A:H2'   | 1:A:233:C:C6     | 2.52                     | 0.44              |
| 1:A:351:G:H2'   | 1:A:352:U:C6     | 2.51                     | 0.44              |

Continued on next page...

Continued from previous page...

| Atom-1          | Atom-2         | Interatomic distance (Å) | Clash overlap (Å) |
|-----------------|----------------|--------------------------|-------------------|
| 1:A:381:A:C6    | 1:A:382:G:C4   | 3.05                     | 0.44              |
| 1:A:50:A:H5'    | 1:A:388:G:H5'' | 1.99                     | 0.44              |
| 1:A:200:G:C6    | 1:A:231:A:N1   | 2.86                     | 0.44              |
| 1:A:381:A:C2    | 1:A:382:G:H1'  | 2.52                     | 0.44              |
| 1:A:157:G:H1    | 1:A:170:A:H1'  | 1.81                     | 0.44              |
| 1:A:260:C:H2'   | 1:A:261:A:O4'  | 2.18                     | 0.44              |
| 1:A:5:A:H2'     | 1:A:6:U:H6     | 1.82                     | 0.44              |
| 1:A:118:C:H2'   | 1:A:119:C:H6   | 1.82                     | 0.44              |
| 1:A:2:U:H2'     | 1:A:3:U:C6     | 2.53                     | 0.44              |
| 1:A:315:G:C6    | 1:A:316:C:N4   | 2.86                     | 0.43              |
| 1:A:32:G:H2'    | 1:A:32:G:N3    | 2.32                     | 0.43              |
| 1:A:128:G:H2'   | 1:A:129:C:H6   | 1.84                     | 0.43              |
| 1:A:252:G:H2'   | 1:A:253:A:H8   | 1.83                     | 0.43              |
| 1:A:380:A:C5    | 1:A:381:A:C8   | 3.06                     | 0.43              |
| 2:B:1:MET:HE3   | 2:B:1:MET:HA   | 1.99                     | 0.43              |
| 1:A:45:A:C2     | 1:A:388:G:H2'  | 2.53                     | 0.43              |
| 1:A:201:A:H2'   | 1:A:202:C:C6   | 2.54                     | 0.43              |
| 1:A:361:C:O2'   | 1:A:362:A:H3'  | 2.18                     | 0.43              |
| 1:A:59:U:H2'    | 1:A:60:C:H6    | 1.82                     | 0.43              |
| 1:A:247:C:H2'   | 1:A:248:G:C8   | 2.54                     | 0.43              |
| 1:A:408:G:H2'   | 1:A:409:A:C8   | 2.53                     | 0.43              |
| 1:A:55:A:H2'    | 1:A:56:U:H6    | 1.83                     | 0.43              |
| 1:A:171:U:C5    | 1:A:172:G:C8   | 3.07                     | 0.43              |
| 1:A:350:A:H3'   | 1:A:351:G:H8   | 1.84                     | 0.43              |
| 2:B:45:LEU:HD11 | 2:B:65:ARG:HG3 | 2.00                     | 0.43              |
| 1:A:32:G:H1     | 1:A:34:U:H1'   | 1.82                     | 0.43              |
| 1:A:380:A:C6    | 1:A:381:A:C5   | 3.07                     | 0.43              |
| 1:A:172:G:C2    | 1:A:173:G:C5   | 3.07                     | 0.43              |
| 1:A:224:G:H2'   | 1:A:225:A:C8   | 2.53                     | 0.43              |
| 1:A:380:A:C2    | 1:A:381:A:H1'  | 2.54                     | 0.43              |
| 1:A:414:C:C2    | 1:A:415:G:C8   | 3.07                     | 0.43              |
| 1:A:164:U:H2'   | 1:A:165:G:O4'  | 2.19                     | 0.42              |
| 1:A:350:A:C5    | 1:A:351:G:C5   | 3.08                     | 0.42              |
| 1:A:264:U:C2    | 1:A:266:A:H5'' | 2.55                     | 0.42              |
| 1:A:7:C:H2'     | 1:A:8:A:C8     | 2.54                     | 0.42              |
| 1:A:17:U:H2'    | 1:A:18:A:C8    | 2.55                     | 0.42              |
| 1:A:32:G:H22    | 1:A:34:U:H1'   | 1.83                     | 0.42              |
| 1:A:114:G:H2'   | 1:A:115:C:C6   | 2.54                     | 0.42              |
| 1:A:214:G:H2'   | 1:A:215:U:C6   | 2.54                     | 0.42              |
| 1:A:230:G:H2'   | 1:A:231:A:C8   | 2.54                     | 0.42              |
| 1:A:345:G:H2'   | 1:A:346:C:H6   | 1.84                     | 0.42              |

Continued on next page...

Continued from previous page...

| Atom-1         | Atom-2          | Interatomic distance (Å) | Clash overlap (Å) |
|----------------|-----------------|--------------------------|-------------------|
| 1:A:20:U:H2'   | 1:A:21:C:C6     | 2.54                     | 0.42              |
| 1:A:103:C:H3'  | 1:A:104:A:H8    | 1.85                     | 0.42              |
| 2:B:9:LYS:HB2  | 2:B:12:GLU:HG2  | 2.02                     | 0.42              |
| 1:A:131:G:C6   | 1:A:132:G:C5    | 3.08                     | 0.42              |
| 1:A:160:C:C2   | 1:A:161:G:C8    | 3.08                     | 0.42              |
| 1:A:282:C:C2   | 1:A:283:C:C5    | 3.07                     | 0.42              |
| 1:A:350:A:H2'  | 1:A:350:A:N3    | 2.35                     | 0.42              |
| 1:A:307:G:H2'  | 1:A:308:A:C8    | 2.54                     | 0.42              |
| 1:A:347:C:C2   | 1:A:348:G:C8    | 3.08                     | 0.42              |
| 1:A:59:U:H1'   | 1:A:257:A:N3    | 2.35                     | 0.42              |
| 1:A:63:A:H2'   | 1:A:64:C:C6     | 2.55                     | 0.42              |
| 1:A:268:G:H8   | 1:A:268:G:OP2   | 2.03                     | 0.42              |
| 1:A:47:G:H1    | 1:A:385:A:H62   | 1.68                     | 0.42              |
| 1:A:119:C:H2'  | 1:A:120:U:C6    | 2.54                     | 0.41              |
| 1:A:385:A:H2'  | 1:A:386:C:O4'   | 2.19                     | 0.41              |
| 1:A:78:C:H2'   | 1:A:79:C:C6     | 2.55                     | 0.41              |
| 2:B:17:PHE:CE1 | 2:B:84:ILE:HD11 | 2.55                     | 0.41              |
| 1:A:196:C:H2'  | 1:A:197:A:H8    | 1.85                     | 0.41              |
| 1:A:283:C:H2'  | 1:A:284:C:H6    | 1.85                     | 0.41              |
| 1:A:200:G:N1   | 1:A:232:A:C2    | 2.88                     | 0.41              |
| 1:A:38:G:H2'   | 1:A:39:C:C6     | 2.55                     | 0.41              |
| 1:A:193:C:H2'  | 1:A:194:C:H6    | 1.84                     | 0.41              |
| 1:A:279:C:H2'  | 1:A:280:U:H6    | 1.85                     | 0.41              |
| 1:A:354:C:C2   | 1:A:355:G:C8    | 3.08                     | 0.41              |
| 1:A:170:A:O2'  | 1:A:171:U:H5'   | 2.20                     | 0.41              |
| 1:A:314:G:C2   | 1:A:315:G:C8    | 3.09                     | 0.41              |
| 1:A:323:A:C2'  | 1:A:324:G:H5'   | 2.50                     | 0.41              |
| 1:A:133:G:H2'  | 1:A:134:C:C6    | 2.56                     | 0.41              |
| 1:A:180:U:H2'  | 1:A:181:A:C8    | 2.46                     | 0.41              |
| 1:A:197:A:H61  | 1:A:233:C:H42   | 1.69                     | 0.41              |
| 1:A:222:U:H2'  | 1:A:223:A:C8    | 2.56                     | 0.41              |
| 1:A:255:A:O4'  | 1:A:257:A:C8    | 2.74                     | 0.41              |
| 1:A:349:G:C2   | 1:A:378:C:N3    | 2.89                     | 0.41              |
| 1:A:350:A:H1'  | 1:A:380:A:N1    | 2.36                     | 0.41              |
| 2:B:28:PHE:CE2 | 2:B:97:VAL:HG23 | 2.56                     | 0.41              |
| 1:A:23:C:H2'   | 1:A:24:U:H6     | 1.86                     | 0.41              |
| 1:A:230:G:H2'  | 1:A:231:A:H8    | 1.86                     | 0.41              |
| 2:B:41:PHE:CZ  | 2:B:72:LYS:HG3  | 2.56                     | 0.41              |
| 1:A:262:A:H1'  | 1:A:271:A:N6    | 2.37                     | 0.40              |
| 1:A:246:A:H2'  | 1:A:247:C:H6    | 1.87                     | 0.40              |
| 1:A:202:C:H2'  | 1:A:203:G:C8    | 2.55                     | 0.40              |

Continued on next page...

Continued from previous page...

| Atom-1        | Atom-2         | Interatomic distance (Å) | Clash overlap (Å) |
|---------------|----------------|--------------------------|-------------------|
| 1:A:315:G:H2' | 1:A:316:C:C5   | 2.56                     | 0.40              |
| 1:A:404:G:H2' | 1:A:405:C:O4'  | 2.22                     | 0.40              |
| 1:A:221:U:H2' | 1:A:222:U:C6   | 2.57                     | 0.40              |
| 1:A:327:U:C2  | 1:A:328:G:C8   | 3.09                     | 0.40              |
| 2:B:17:PHE:HA | 2:B:31:TYR:CD2 | 2.57                     | 0.40              |
| 1:A:219:C:H2' | 1:A:220:C:H6   | 1.85                     | 0.40              |

There are no symmetry-related clashes.

### 5.3 Torsion angles [i](#)

#### 5.3.1 Protein backbone [i](#)

In the following table, the Percentiles column shows the percent Ramachandran outliers of the chain as a percentile score with respect to all PDB entries followed by that with respect to all EM entries.

The Analysed column shows the number of residues for which the backbone conformation was analysed, and the total number of residues.

| Mol | Chain | Analysed      | Favoured  | Allowed | Outliers | Percentiles |
|-----|-------|---------------|-----------|---------|----------|-------------|
| 2   | B     | 114/116 (98%) | 111 (97%) | 3 (3%)  | 0        | 100 100     |

There are no Ramachandran outliers to report.

#### 5.3.2 Protein sidechains [i](#)

In the following table, the Percentiles column shows the percent sidechain outliers of the chain as a percentile score with respect to all PDB entries followed by that with respect to all EM entries.

The Analysed column shows the number of residues for which the sidechain conformation was analysed, and the total number of residues.

| Mol | Chain | Analysed     | Rotameric | Outliers | Percentiles |
|-----|-------|--------------|-----------|----------|-------------|
| 2   | B     | 99/99 (100%) | 96 (97%)  | 3 (3%)   | 36 68       |

All (3) residues with a non-rotameric sidechain are listed below:

| Mol | Chain | Res | Type |
|-----|-------|-----|------|
| 2   | B     | 69  | LEU  |
| 2   | B     | 71  | LEU  |
| 2   | B     | 111 | LEU  |

Sometimes sidechains can be flipped to improve hydrogen bonding and reduce clashes. There are no such sidechains identified.

### 5.3.3 RNA [i](#)

| Mol | Chain | Analysed      | Backbone Outliers | Pucker Outliers |
|-----|-------|---------------|-------------------|-----------------|
| 1   | A     | 416/417 (99%) | 132 (31%)         | 3 (0%)          |

All (132) RNA backbone outliers are listed below:

| Mol | Chain | Res | Type |
|-----|-------|-----|------|
| 1   | A     | 2   | U    |
| 1   | A     | 8   | A    |
| 1   | A     | 9   | U    |
| 1   | A     | 11  | C    |
| 1   | A     | 15  | G    |
| 1   | A     | 22  | G    |
| 1   | A     | 28  | G    |
| 1   | A     | 30  | C    |
| 1   | A     | 32  | G    |
| 1   | A     | 33  | U    |
| 1   | A     | 35  | U    |
| 1   | A     | 36  | C    |
| 1   | A     | 48  | A    |
| 1   | A     | 50  | A    |
| 1   | A     | 51  | G    |
| 1   | A     | 52  | U    |
| 1   | A     | 53  | C    |
| 1   | A     | 67  | U    |
| 1   | A     | 68  | G    |
| 1   | A     | 74  | A    |
| 1   | A     | 75  | U    |
| 1   | A     | 76  | G    |
| 1   | A     | 78  | C    |
| 1   | A     | 80  | G    |
| 1   | A     | 82  | A    |
| 1   | A     | 83  | G    |
| 1   | A     | 85  | G    |

*Continued on next page...*

*Continued from previous page...*

| Mol | Chain | Res | Type |
|-----|-------|-----|------|
| 1   | A     | 91  | G    |
| 1   | A     | 99  | A    |
| 1   | A     | 101 | U    |
| 1   | A     | 102 | C    |
| 1   | A     | 103 | C    |
| 1   | A     | 108 | G    |
| 1   | A     | 117 | G    |
| 1   | A     | 118 | C    |
| 1   | A     | 121 | G    |
| 1   | A     | 122 | G    |
| 1   | A     | 123 | C    |
| 1   | A     | 126 | U    |
| 1   | A     | 127 | G    |
| 1   | A     | 128 | G    |
| 1   | A     | 132 | G    |
| 1   | A     | 134 | C    |
| 1   | A     | 135 | U    |
| 1   | A     | 137 | A    |
| 1   | A     | 138 | C    |
| 1   | A     | 139 | G    |
| 1   | A     | 141 | C    |
| 1   | A     | 142 | G    |
| 1   | A     | 146 | A    |
| 1   | A     | 149 | G    |
| 1   | A     | 150 | A    |
| 1   | A     | 151 | A    |
| 1   | A     | 152 | C    |
| 1   | A     | 164 | U    |
| 1   | A     | 171 | U    |
| 1   | A     | 172 | G    |
| 1   | A     | 177 | G    |
| 1   | A     | 180 | U    |
| 1   | A     | 182 | C    |
| 1   | A     | 184 | C    |
| 1   | A     | 185 | U    |
| 1   | A     | 186 | G    |
| 1   | A     | 190 | G    |
| 1   | A     | 192 | G    |
| 1   | A     | 193 | C    |
| 1   | A     | 195 | A    |
| 1   | A     | 198 | G    |
| 1   | A     | 199 | U    |

*Continued on next page...*

*Continued from previous page...*

| Mol | Chain | Res | Type |
|-----|-------|-----|------|
| 1   | A     | 200 | G    |
| 1   | A     | 202 | C    |
| 1   | A     | 203 | G    |
| 1   | A     | 204 | G    |
| 1   | A     | 207 | C    |
| 1   | A     | 208 | U    |
| 1   | A     | 213 | G    |
| 1   | A     | 219 | C    |
| 1   | A     | 226 | G    |
| 1   | A     | 227 | G    |
| 1   | A     | 232 | A    |
| 1   | A     | 234 | G    |
| 1   | A     | 236 | G    |
| 1   | A     | 237 | G    |
| 1   | A     | 238 | U    |
| 1   | A     | 240 | A    |
| 1   | A     | 241 | A    |
| 1   | A     | 242 | C    |
| 1   | A     | 250 | G    |
| 1   | A     | 254 | G    |
| 1   | A     | 255 | A    |
| 1   | A     | 257 | A    |
| 1   | A     | 264 | U    |
| 1   | A     | 265 | G    |
| 1   | A     | 267 | U    |
| 1   | A     | 268 | G    |
| 1   | A     | 269 | G    |
| 1   | A     | 276 | C    |
| 1   | A     | 292 | A    |
| 1   | A     | 296 | A    |
| 1   | A     | 304 | A    |
| 1   | A     | 312 | G    |
| 1   | A     | 314 | G    |
| 1   | A     | 317 | G    |
| 1   | A     | 318 | C    |
| 1   | A     | 320 | U    |
| 1   | A     | 321 | G    |
| 1   | A     | 323 | A    |
| 1   | A     | 324 | G    |
| 1   | A     | 329 | U    |
| 1   | A     | 330 | A    |
| 1   | A     | 334 | A    |

*Continued on next page...*

Continued from previous page...

| Mol | Chain | Res | Type |
|-----|-------|-----|------|
| 1   | A     | 349 | G    |
| 1   | A     | 351 | G    |
| 1   | A     | 362 | A    |
| 1   | A     | 365 | G    |
| 1   | A     | 366 | C    |
| 1   | A     | 367 | C    |
| 1   | A     | 368 | G    |
| 1   | A     | 369 | C    |
| 1   | A     | 372 | G    |
| 1   | A     | 373 | C    |
| 1   | A     | 376 | U    |
| 1   | A     | 378 | C    |
| 1   | A     | 379 | G    |
| 1   | A     | 380 | A    |
| 1   | A     | 381 | A    |
| 1   | A     | 383 | G    |
| 1   | A     | 389 | A    |
| 1   | A     | 406 | A    |
| 1   | A     | 408 | G    |
| 1   | A     | 410 | U    |
| 1   | A     | 411 | U    |

All (3) RNA pucker outliers are listed below:

| Mol | Chain | Res | Type |
|-----|-------|-----|------|
| 1   | A     | 122 | G    |
| 1   | A     | 126 | U    |
| 1   | A     | 141 | C    |

#### 5.4 Non-standard residues in protein, DNA, RNA chains [i](#)

There are no non-standard protein/DNA/RNA residues in this entry.

#### 5.5 Carbohydrates [i](#)

There are no oligosaccharides in this entry.

#### 5.6 Ligand geometry [i](#)

Of 24 ligands modelled in this entry, 24 are monoatomic - leaving 0 for Mogul analysis.

There are no bond length outliers.

There are no bond angle outliers.

There are no chirality outliers.

There are no torsion outliers.

There are no ring outliers.

No monomer is involved in short contacts.

## 5.7 Other polymers [i](#)

There are no such residues in this entry.

## 5.8 Polymer linkage issues [i](#)

There are no chain breaks in this entry.

For Manuscript Review

## 6 Map visualisation [i](#)

This section contains visualisations of the EMDB entry EMD-70997. These allow visual inspection of the internal detail of the map and identification of artifacts.

Images derived from a raw map, generated by summing the deposited half-maps, are presented below the corresponding image components of the primary map to allow further visual inspection and comparison with those of the primary map.

### 6.1 Orthogonal projections [i](#)

#### 6.1.1 Primary map

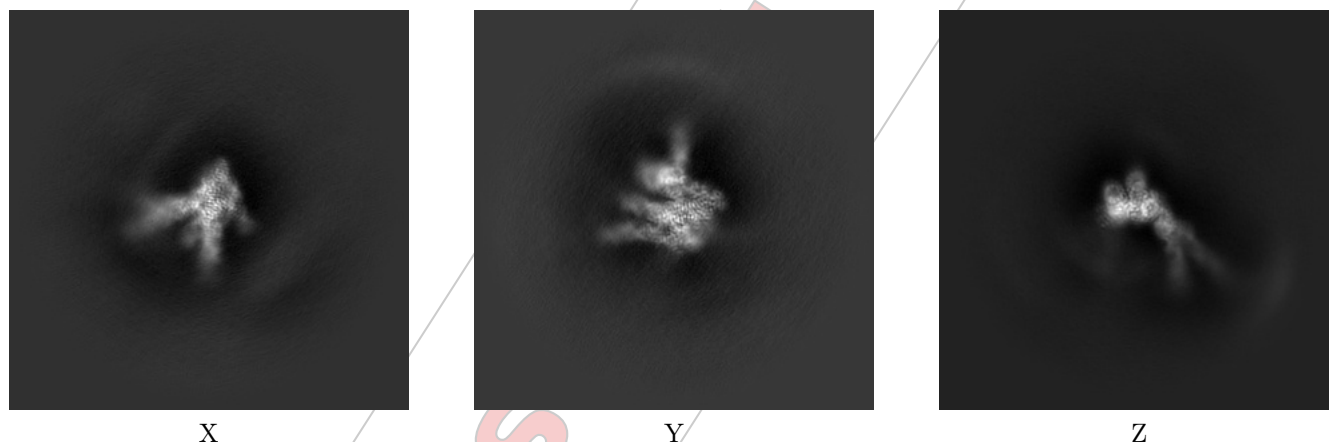

#### 6.1.2 Raw map

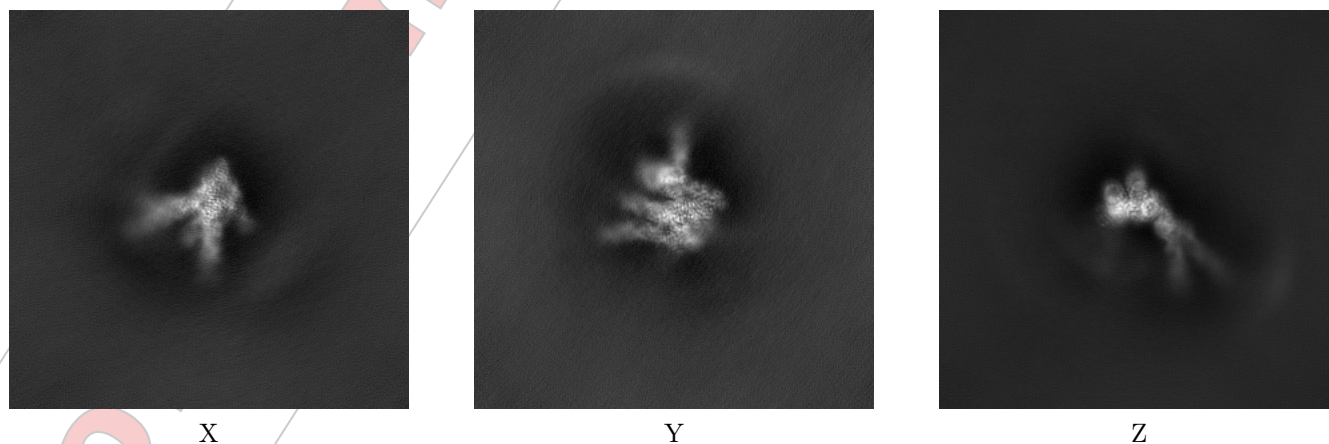

The images above show the map projected in three orthogonal directions.

## 6.2 Central slices [i](#)

### 6.2.1 Primary map

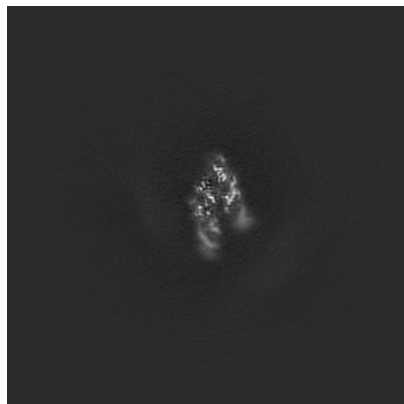

X Index: 200

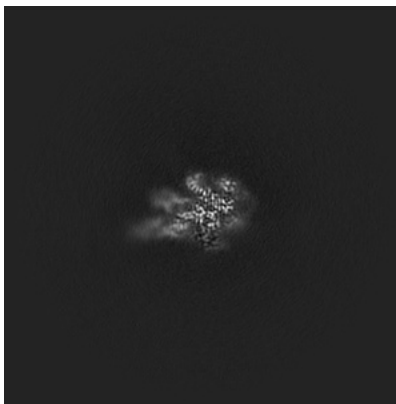

Y Index: 200

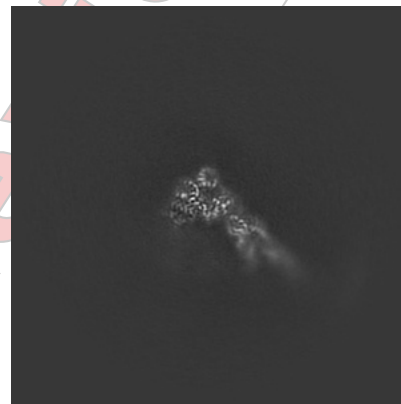

Z Index: 200

### 6.2.2 Raw map

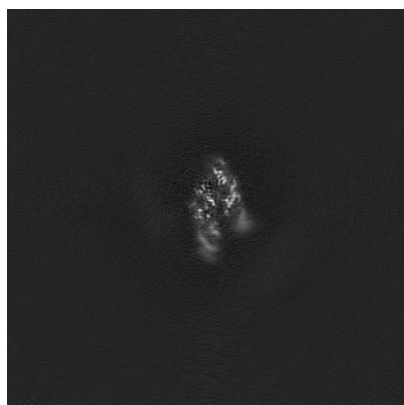

X Index: 200

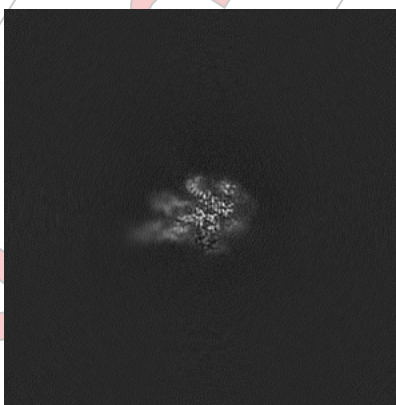

Y Index: 200

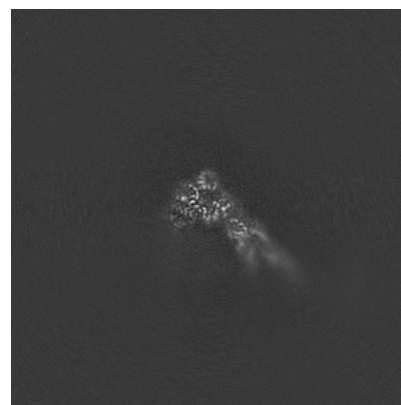

Z Index: 200

The images above show central slices of the map in three orthogonal directions.

## 6.3 Largest variance slices [i](#)

### 6.3.1 Primary map

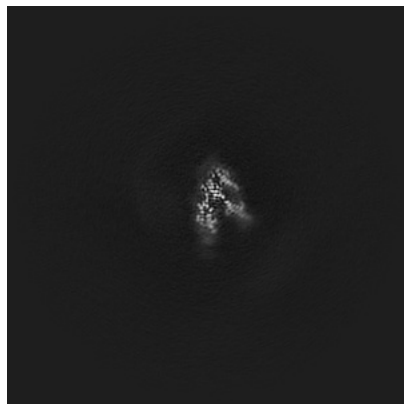

X Index: 193

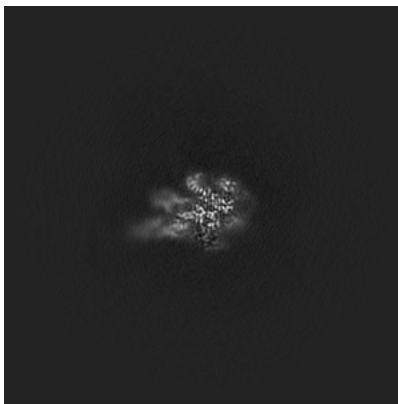

Y Index: 200

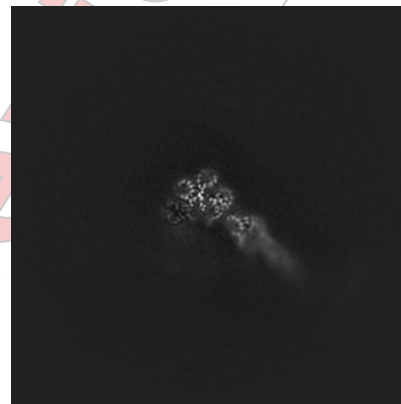

Z Index: 204

### 6.3.2 Raw map

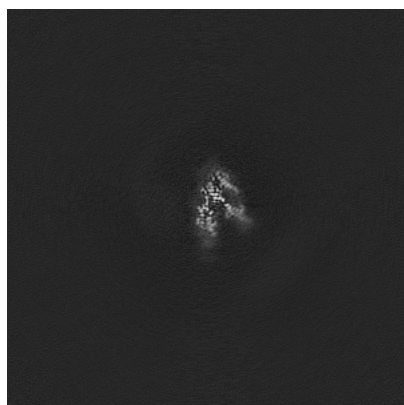

X Index: 193

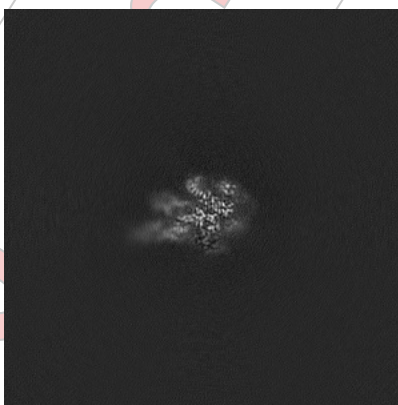

Y Index: 200

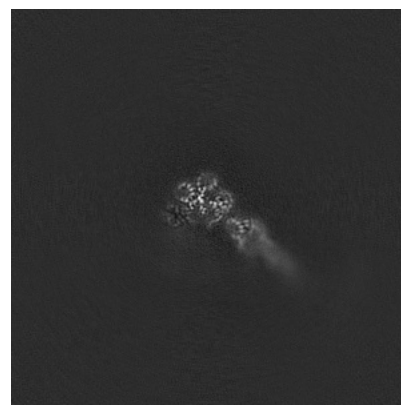

Z Index: 204

The images above show the largest variance slices of the map in three orthogonal directions.

## 6.4 Orthogonal standard-deviation projections (False-color) [i](#)

### 6.4.1 Primary map

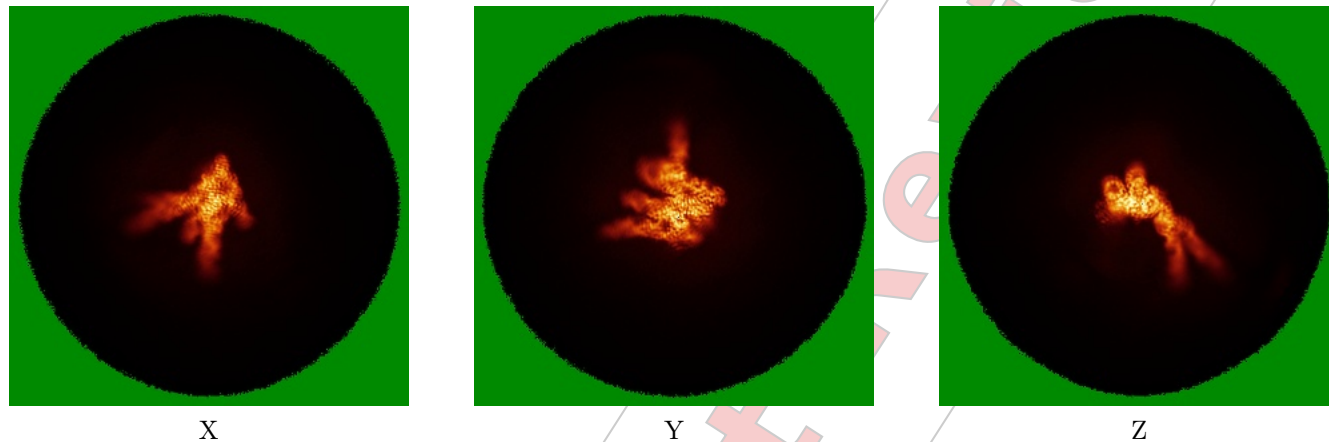

### 6.4.2 Raw map

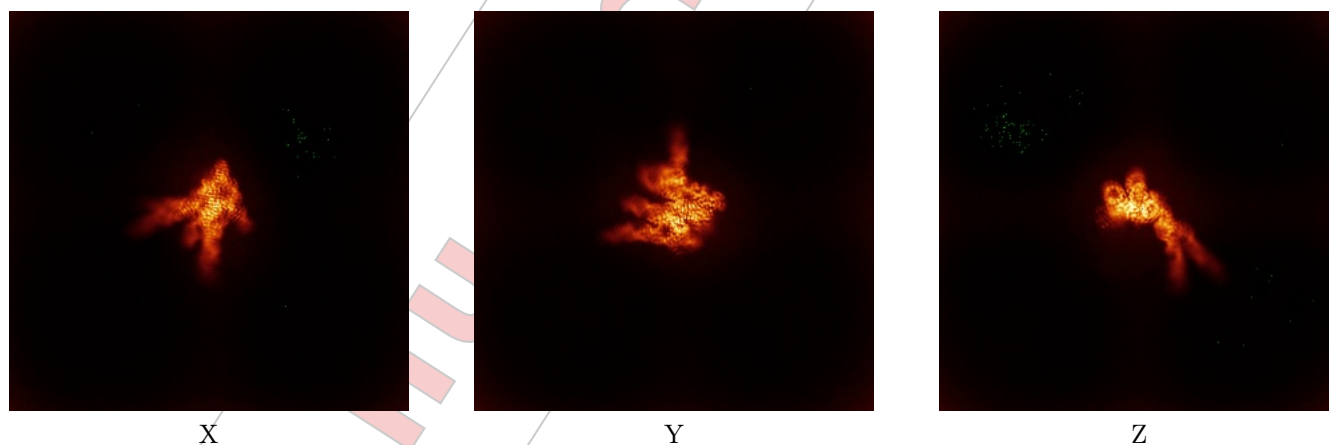

The images above show the map standard deviation projections with false color in three orthogonal directions. Minimum values are shown in green, max in blue, and dark to light orange shades represent small to large values respectively.

## 6.5 Orthogonal surface views [i](#)

### 6.5.1 Primary map

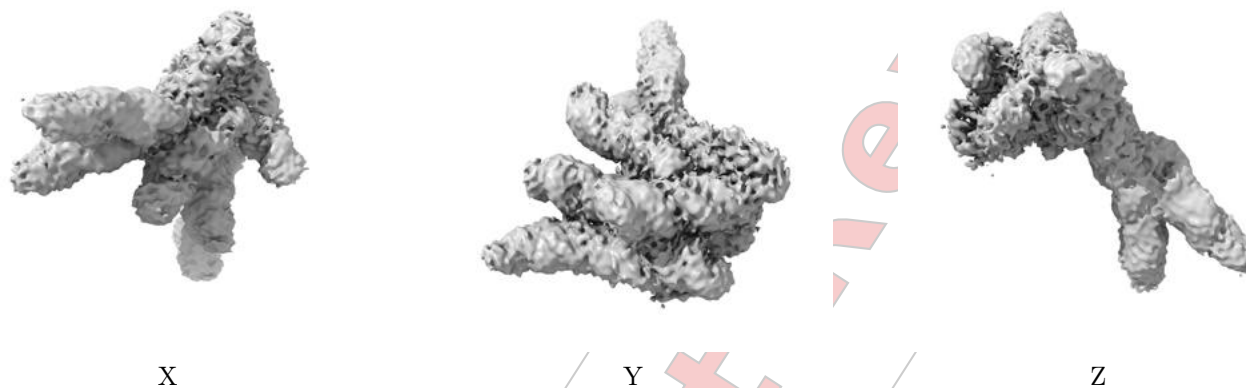

The images above show the 3D surface view of the map at the recommended contour level 0.04. These images, in conjunction with the slice images, may facilitate assessment of whether an appropriate contour level has been provided.

### 6.5.2 Raw map

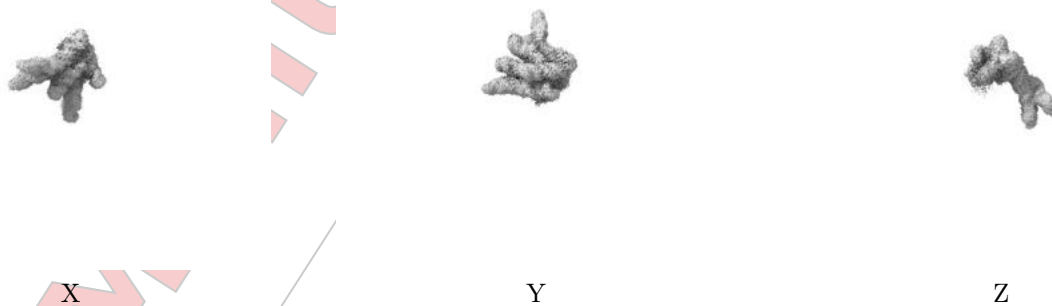

These images show the 3D surface of the raw map. The raw map's contour level was selected so that its surface encloses the same volume as the primary map does at its recommended contour level.

## 6.6 Mask visualisation [i](#)

This section was not generated. No masks/segmentation were deposited.

## 7 Map analysis [i](#)

This section contains the results of statistical analysis of the map.

### 7.1 Map-value distribution [i](#)

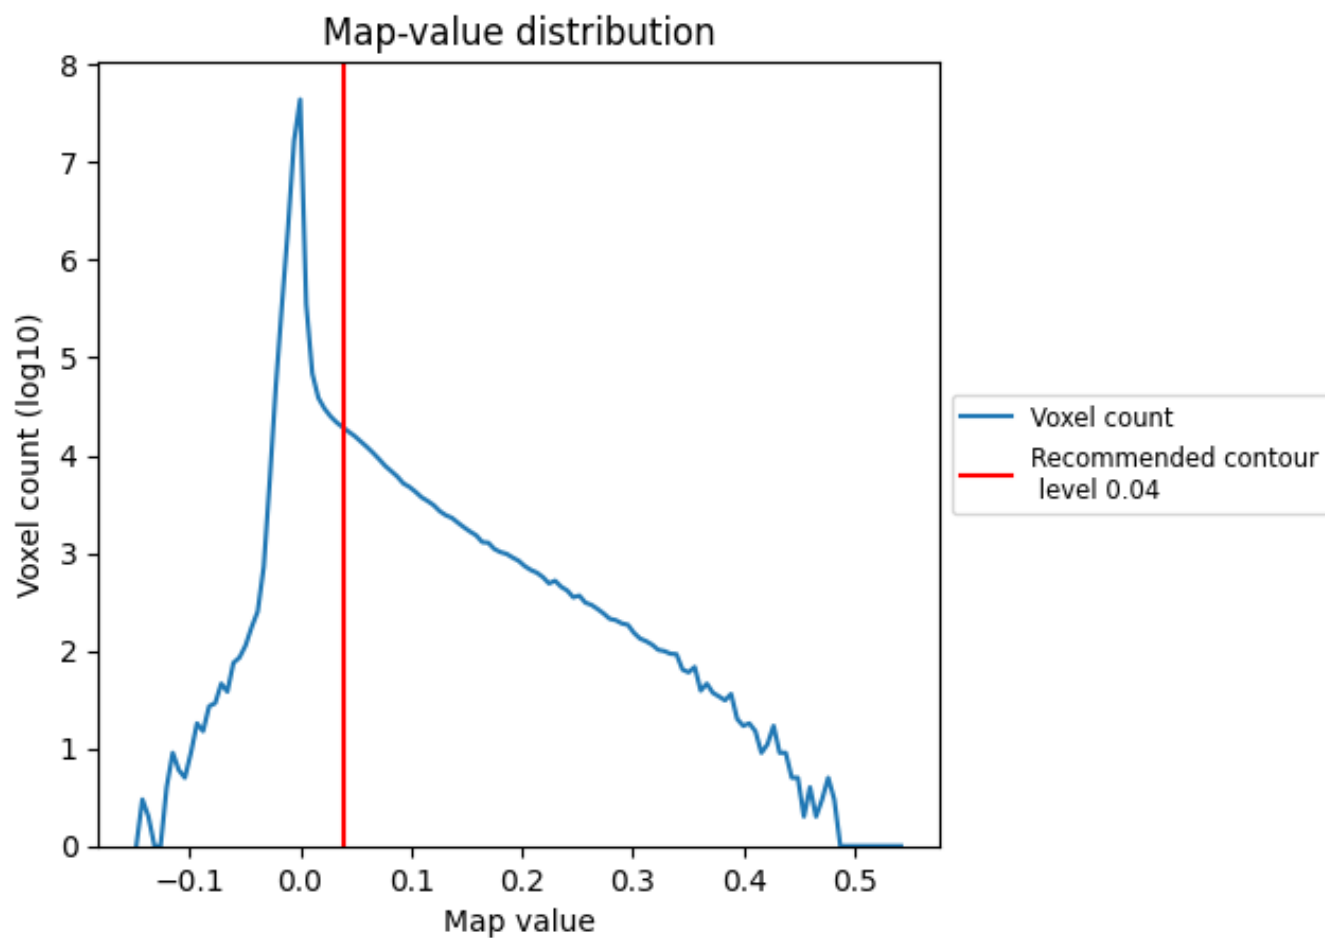

The map-value distribution is plotted in 128 intervals along the x-axis. The y-axis is logarithmic. A spike in this graph at zero usually indicates that the volume has been masked.

## 7.2 Volume estimate [i](#)

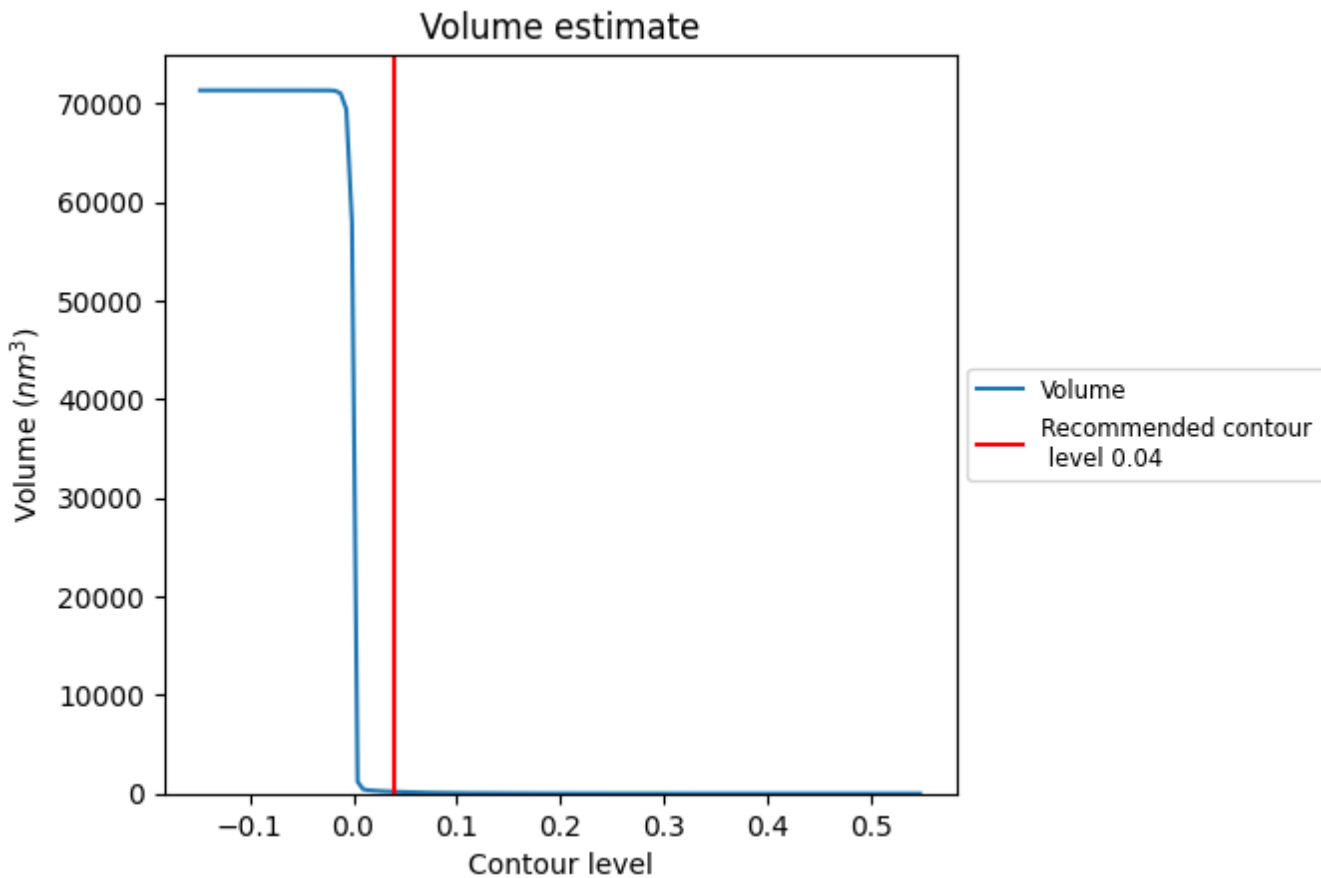

The volume at the recommended contour level is 187  $\text{nm}^3$ ; this corresponds to an approximate mass of 169 kDa.

The volume estimate graph shows how the enclosed volume varies with the contour level. The recommended contour level is shown as a vertical line and the intersection between the line and the curve gives the volume of the enclosed surface at the given level.

7.3 Rotationally averaged power spectrum 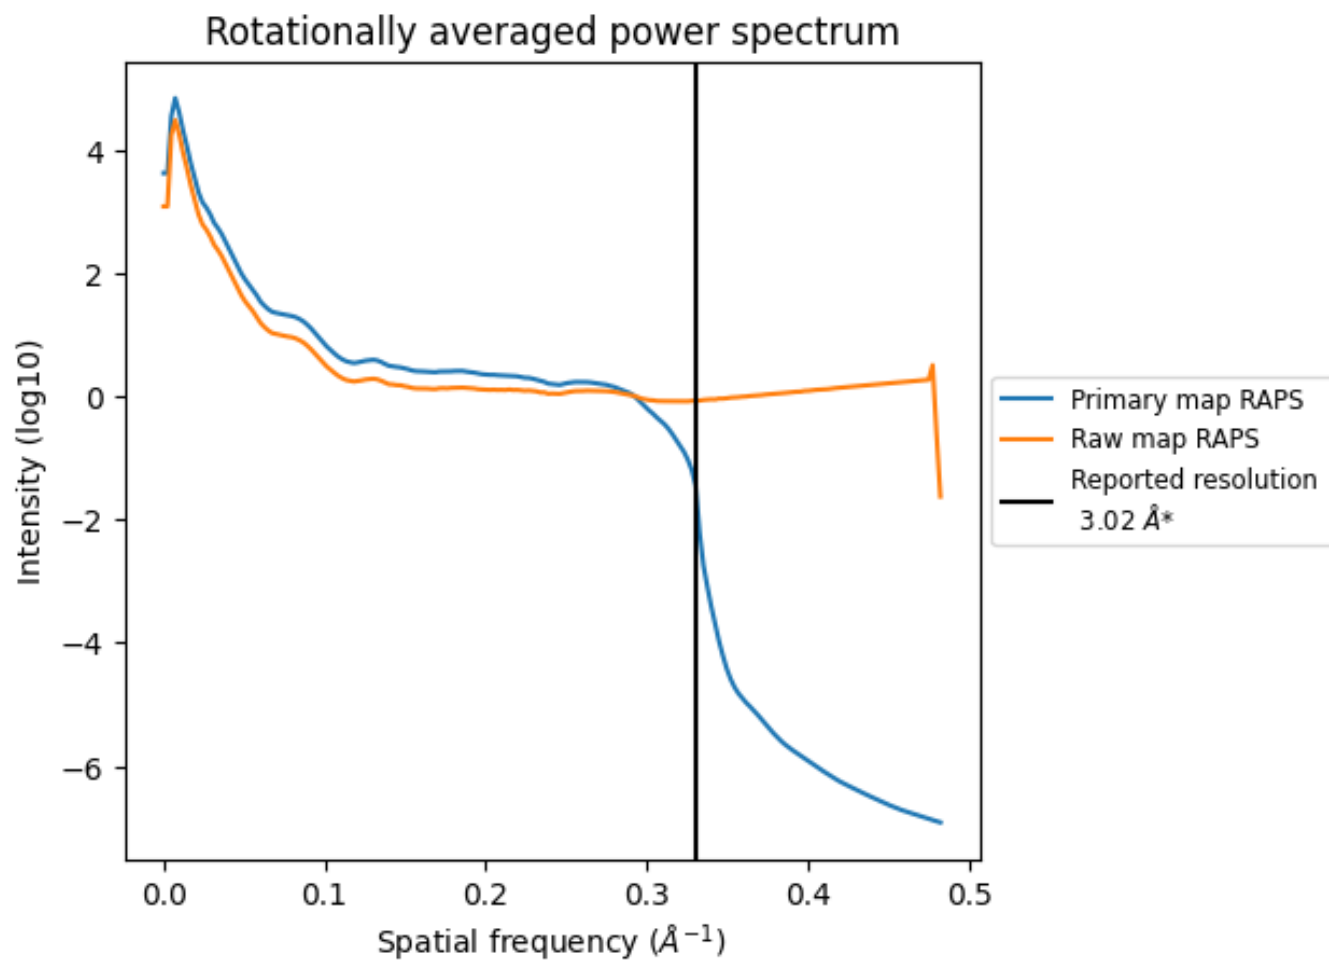

\*Reported resolution corresponds to spatial frequency of 0.331 Å<sup>-1</sup>

## 8 Fourier-Shell correlation [\(i\)](#)

Fourier-Shell Correlation (FSC) is the most commonly used method to estimate the resolution of single-particle and subtomogram-averaged maps. The shape of the curve depends on the imposed symmetry, mask and whether or not the two 3D reconstructions used were processed from a common reference. The reported resolution is shown as a black line. A curve is displayed for the half-bit criterion in addition to lines showing the 0.143 gold standard cut-off and 0.5 cut-off.

### 8.1 FSC [\(i\)](#)

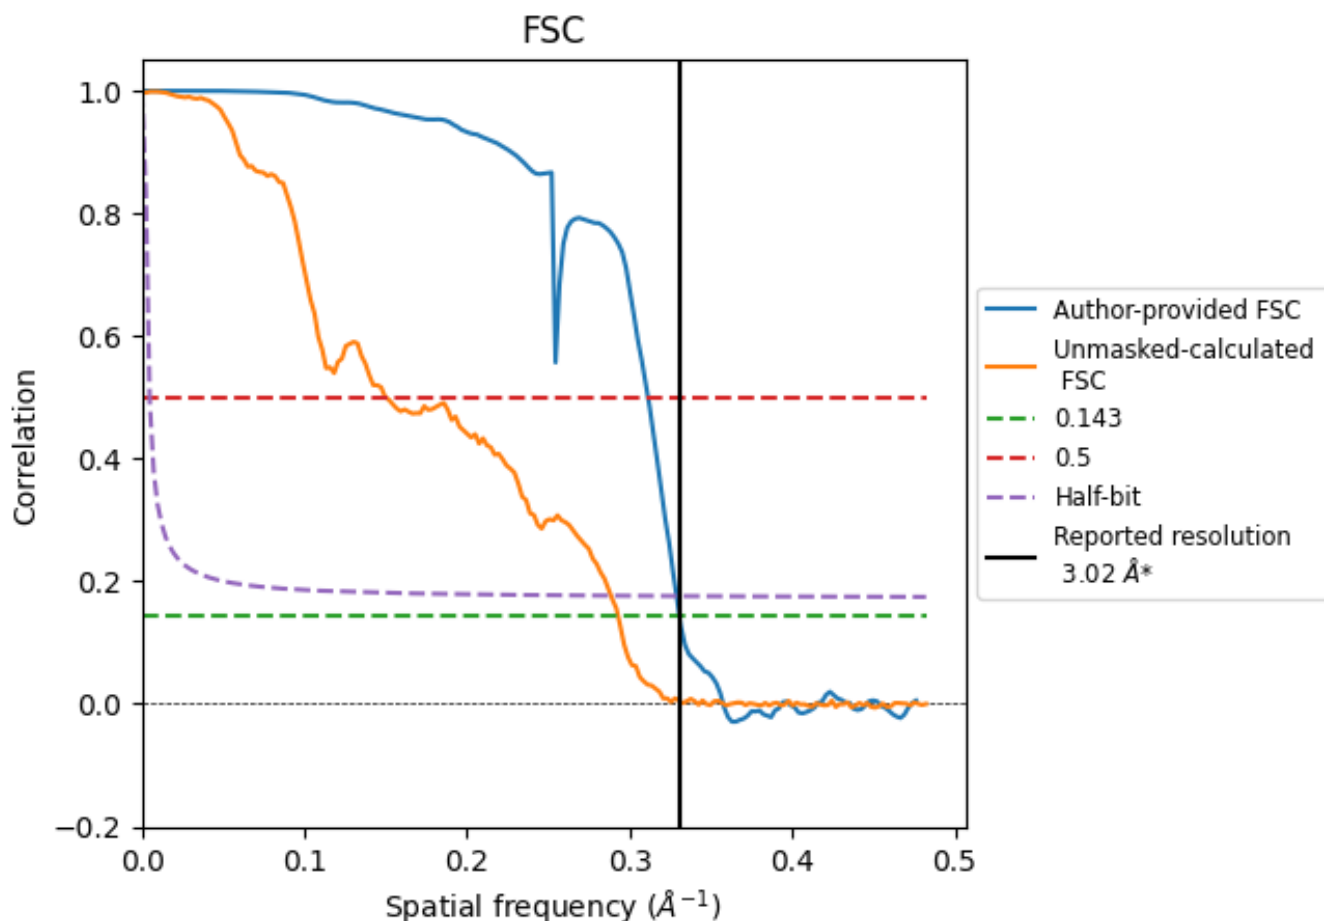

\*Reported resolution corresponds to spatial frequency of 0.331 Å<sup>-1</sup>

## 8.2 Resolution estimates [i](#)

| Resolution estimate (Å)   | Estimation criterion (FSC cut-off) |      |          |
|---------------------------|------------------------------------|------|----------|
|                           | 0.143                              | 0.5  | Half-bit |
| Reported by author        | 3.02                               | -    | -        |
| Author-provided FSC curve | 3.02                               | 3.21 | 3.04     |
| Unmasked-calculated*      | 3.42                               | 6.67 | 3.47     |

\*Resolution estimate based on FSC curve calculated by comparison of deposited half-maps. The value from deposited half-maps intersecting FSC 0.143 CUT-OFF 3.42 differs from the reported value 3.02 by more than 10 %

## 9 Map-model fit [i](#)

This section contains information regarding the fit between EMDB map EMD-70997 and PDB model 9OY5. Per-residue inclusion information can be found in section 3 on page 4.

### 9.1 Map-model overlay [i](#)

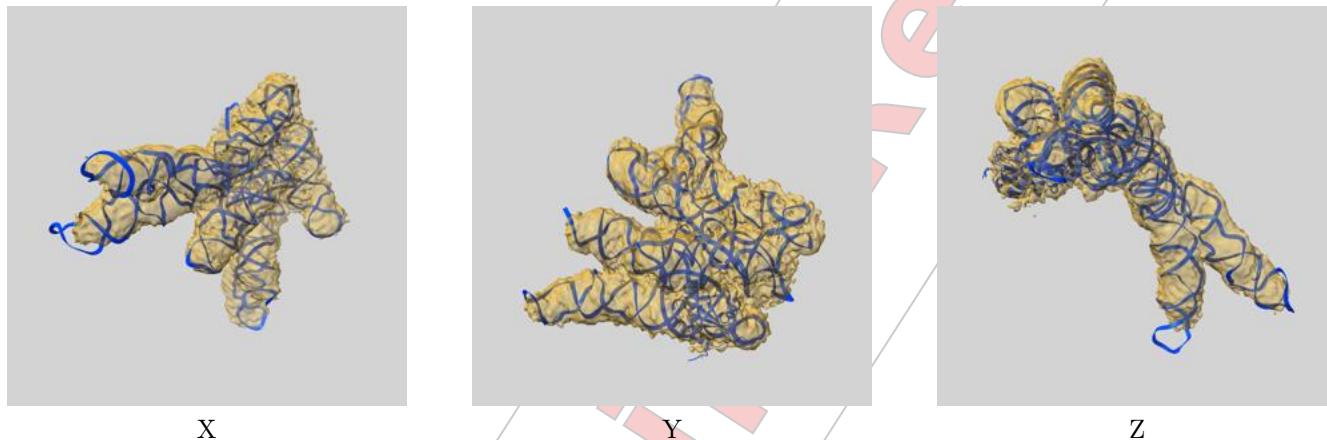

The images above show the 3D surface view of the map at the recommended contour level 0.04 at 50% transparency in yellow overlaid with a ribbon representation of the model coloured in blue. These images allow for the visual assessment of the quality of fit between the atomic model and the map.

## 9.2 Q-score mapped to coordinate model [i](#)

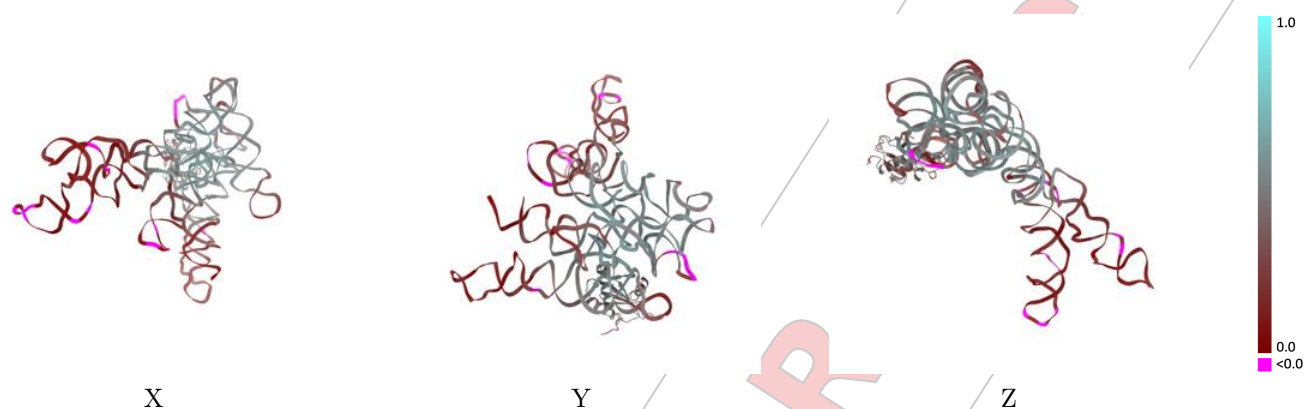

The images above show the model with each residue coloured according to its Q-score. This shows their resolvability in the map with higher Q-score values reflecting better resolvability. Please note: Q-score is calculating the resolvability of atoms, and thus high values are only expected at resolutions at which atoms can be resolved. Low Q-score values may therefore be expected for many entries.

## 9.3 Atom inclusion mapped to coordinate model [i](#)

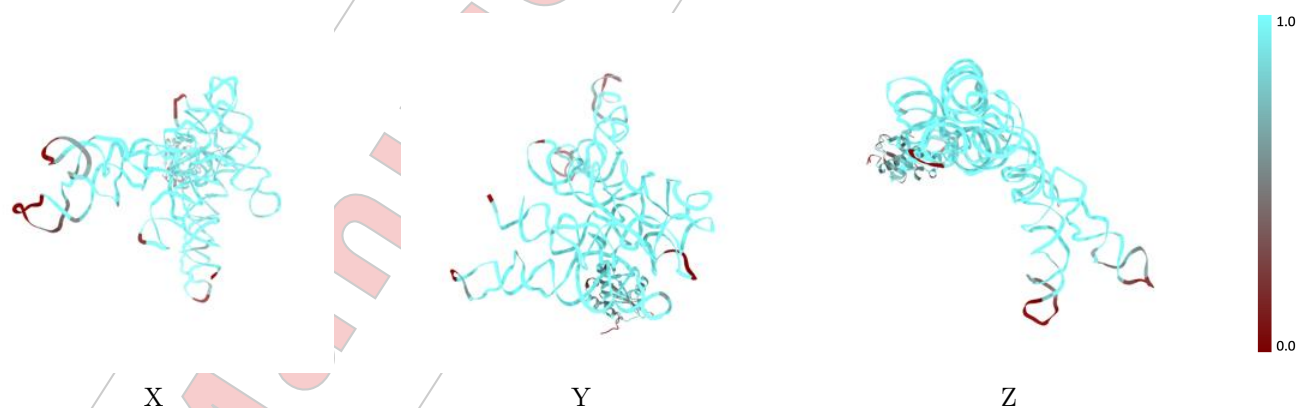

The images above show the model with each residue coloured according to its atom inclusion. This shows to what extent they are inside the map at the recommended contour level (0.04).

9.4 Atom inclusion [i](#)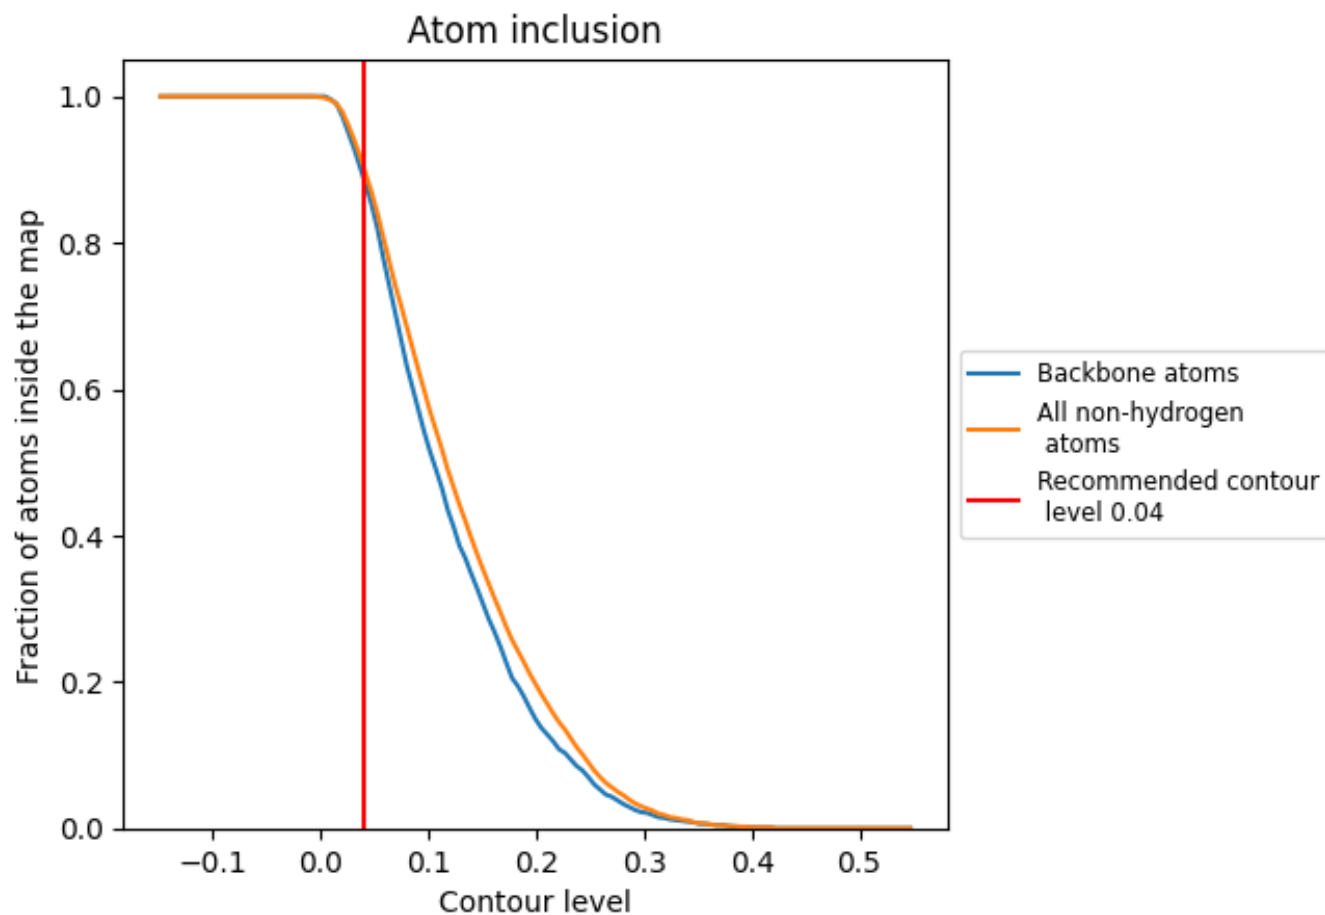

At the recommended contour level, 89% of all backbone atoms, 90% of all non-hydrogen atoms, are inside the map.

## 9.5 Map-model fit summary [i](#)

The table lists the average atom inclusion at the recommended contour level (0.04) and Q-score for the entire model and for each chain.

| Chain | Atom inclusion                                                                           | Q-score                                                                                  |
|-------|------------------------------------------------------------------------------------------|------------------------------------------------------------------------------------------|
| All   |  0.9050 |  0.3520 |
| A     |  0.9210 |  0.3440 |
| B     |  0.7530 |  0.4260 |

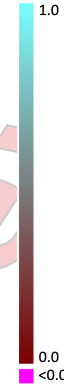



# Full wwPDB EM Validation Report ⓘ

Jun 6, 2025 – 12:13 PM EDT

PDB ID : 9OY6 / pdb\_00009oy6  
EMDB ID : EMD-70998  
Title : Structure of Geobacillus stearotherophilus RNase P holoenzyme tetraloop mutant (sub-conformation 2)  
Deposited on : 2025-06-04  
Resolution : 2.96 Å (reported)  
Based on initial model : 2A64

**This wwPDB validation report is for manuscript review**

This is a Full wwPDB EM Validation Report.

This report is produced by the wwPDB biocuration pipeline after annotation of the structure.

We welcome your comments at [validation@mail.wwpdb.org](mailto:validation@mail.wwpdb.org)

A user guide is available at

<https://www.wwpdb.org/validation/2017/EMValidationReportHelp>

with specific help available everywhere you see the ⓘ symbol.

The types of validation reports are described at

<http://www.wwpdb.org/validation/2017/FAQs#types>.

---

The following versions of software and data (see [references ⓘ](#)) were used in the production of this report:

EMDB validation analysis : 0.0.1.dev118  
MolProbity : 4-5-2 with Phenix2.0rc1  
Percentile statistics : 20231227.v01 (using entries in the PDB archive December 27th 2023)  
MapQ : 1.9.13  
Ideal geometry (proteins) : Engh & Huber (2001)  
Ideal geometry (DNA, RNA) : Parkinson et al. (1996)  
Validation Pipeline (wwPDB-VP) : 2.43.1

# 1 Overall quality at a glance i

The following experimental techniques were used to determine the structure:  
*ELECTRON MICROSCOPY*

The reported resolution of this entry is 2.96 Å.

Percentile scores (ranging between 0-100) for global validation metrics of the entry are shown in the following graphic. The table shows the number of entries on which the scores are based.

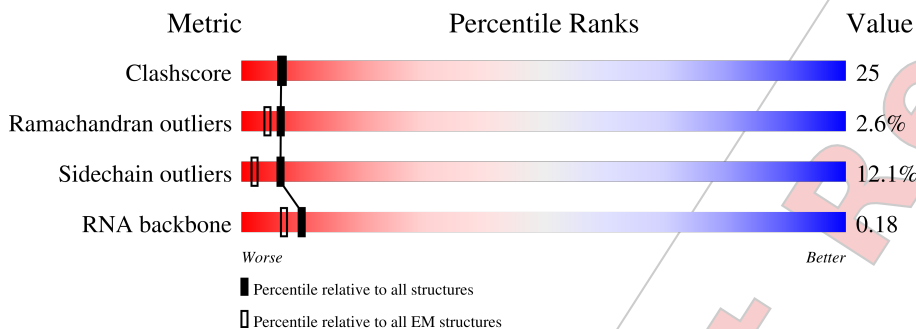

| Metric                | Whole archive (#Entries) | EM structures (#Entries) |
|-----------------------|--------------------------|--------------------------|
| Clashscore            | 210492                   | 15764                    |
| Ramachandran outliers | 207382                   | 16835                    |
| Sidechain outliers    | 206894                   | 16415                    |
| RNA backbone          | 6643                     | 2191                     |

The table below summarises the geometric issues observed across the polymeric chains and their fit to the map. The red, orange, yellow and green segments of the bar indicate the fraction of residues that contain outliers for  $\geq 3$ , 2, 1 and 0 types of geometric quality criteria respectively. A grey segment represents the fraction of residues that are not modelled. The numeric value for each fraction is indicated below the corresponding segment, with a dot representing fractions  $\leq 5\%$ . The upper red bar (where present) indicates the fraction of residues that have poor fit to the EM map (all-atom inclusion  $< 40\%$ ). The numeric value is given above the bar.

| Mol | Chain | Length | Quality of chain |
|-----|-------|--------|------------------|
| 1   | A     | 417    |                  |
| 2   | B     | 116    |                  |

The following table lists non-polymeric compounds, carbohydrate monomers and non-standard residues in protein, DNA, RNA chains that are outliers for geometric or electron-density-fit criteria:

| Mol | Type | Chain | Res | Chirality | Geometry | Clashes | Electron density |
|-----|------|-------|-----|-----------|----------|---------|------------------|
| 3   | CA   | A     | 517 | -         | -        | X       | -                |

For Manuscript Review

## 2 Entry composition i

There are 3 unique types of molecules in this entry. The entry contains 9925 atoms, of which 0 are hydrogens and 0 are deuteriums.

In the tables below, the AltConf column contains the number of residues with at least one atom in alternate conformation and the Trace column contains the number of residues modelled with at most 2 atoms.

- Molecule 1 is a RNA chain called RNase P RNA tetraloop mutant.

| Mol | Chain | Residues | Atoms |      |      |      |     | AltConf | Trace |
|-----|-------|----------|-------|------|------|------|-----|---------|-------|
|     |       |          | Total | C    | N    | O    | P   |         |       |
| 1   | A     | 417      | 8953  | 3992 | 1648 | 2896 | 417 | 0       | 0     |

There are 6 discrepancies between the modelled and reference sequences:

| Chain | Residue | Modelled | Actual | Comment             | Reference |
|-------|---------|----------|--------|---------------------|-----------|
| A     | 126     | U        | C      | conflict            | GB 143442 |
| A     | 215     | U        | G      | engineered mutation | GB 143442 |
| A     | 216     | U        | A      | engineered mutation | GB 143442 |
| A     | 217     | U        | A      | engineered mutation | GB 143442 |
| A     | 218     | U        | A      | engineered mutation | GB 143442 |
| A     | 417     | C        | G      | conflict            | GB 143442 |

- Molecule 2 is a protein called Ribonuclease P protein component.

| Mol | Chain | Residues | Atoms |     |     |     |   | AltConf | Trace |
|-----|-------|----------|-------|-----|-----|-----|---|---------|-------|
|     |       |          | Total | C   | N   | O   | S |         |       |
| 2   | B     | 116      | 947   | 608 | 174 | 162 | 3 | 0       | 0     |

There are 2 discrepancies between the modelled and reference sequences:

| Chain | Residue | Modelled | Actual | Comment        | Reference      |
|-------|---------|----------|--------|----------------|----------------|
| B     | 0       | GLY      | -      | expression tag | UNP A0A150N245 |
| B     | 64      | ILE      | VAL    | conflict       | UNP A0A150N245 |

- Molecule 3 is CALCIUM ION (CCD ID: CA) (formula: Ca) (labeled as "Ligand of Interest" by depositor).

| Mol | Chain | Residues | Atoms |    | AltConf |
|-----|-------|----------|-------|----|---------|
| 3   | A     | 25       | Total | Ca | 0       |
|     |       |          | 25    | 25 |         |

### 3 Residue-property plots

These plots are drawn for all protein, RNA, DNA and oligosaccharide chains in the entry. The first graphic for a chain summarises the proportions of the various outlier classes displayed in the second graphic. The second graphic shows the sequence view annotated by issues in geometry and atom inclusion in map density. Residues are color-coded according to the number of geometric quality criteria for which they contain at least one outlier: green = 0, yellow = 1, orange = 2 and red = 3 or more. A red diamond above a residue indicates a poor fit to the EM map for this residue (all-atom inclusion < 40%). Stretches of 2 or more consecutive residues without any outlier are shown as a green connector. Residues present in the sample, but not in the model, are shown in grey.

- Molecule 1: RNase P RNA tetraloop mutant

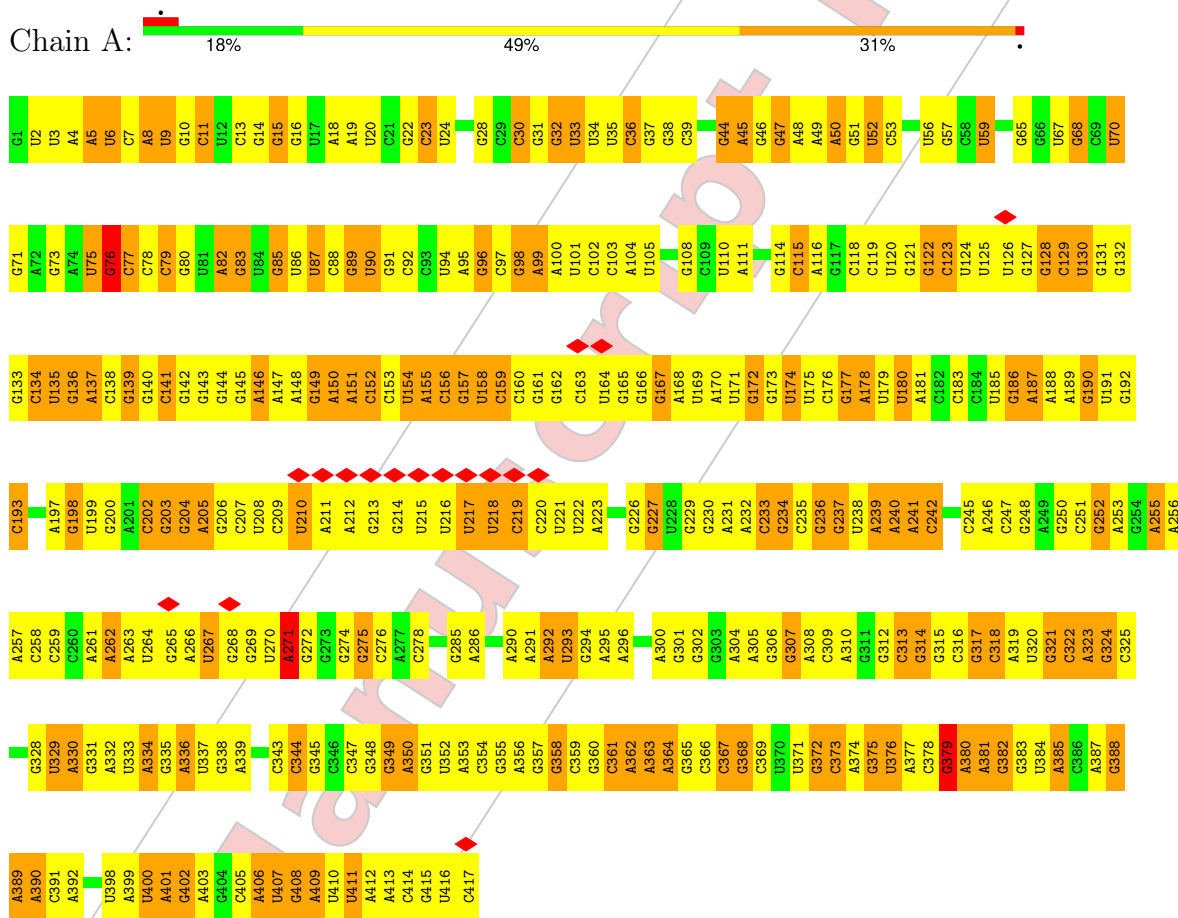

- Molecule 2: Ribonuclease P protein component

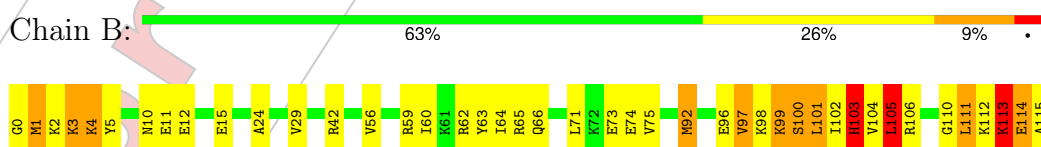

## 4 Experimental information i

| Property                             | Value                                   | Source    |
|--------------------------------------|-----------------------------------------|-----------|
| EM reconstruction method             | SINGLE PARTICLE                         | Depositor |
| Imposed symmetry                     | POINT, Not provided                     |           |
| Number of particles used             | 157466                                  | Depositor |
| Resolution determination method      | FSC 0.143 CUT-OFF                       | Depositor |
| CTF correction method                | PHASE FLIPPING AND AMPLITUDE CORRECTION | Depositor |
| Microscope                           | FEI TALOS ARCTICA                       | Depositor |
| Voltage (kV)                         | 200                                     | Depositor |
| Electron dose ( $e^-/\text{\AA}^2$ ) | 57                                      | Depositor |
| Minimum defocus (nm)                 | 500                                     | Depositor |
| Maximum defocus (nm)                 | 1500                                    | Depositor |
| Magnification                        | Not provided                            |           |
| Image detector                       | GATAN K3 BIOQUANTUM (6k x 4k)           | Depositor |
| Maximum map value                    | 0.567                                   | Depositor |
| Minimum map value                    | -0.191                                  | Depositor |
| Average map value                    | -0.000                                  | Depositor |
| Map value standard deviation         | 0.006                                   | Depositor |
| Recommended contour level            | 0.033                                   | Depositor |
| Map size (Å)                         | 414.72, 414.72, 414.72                  | wwPDB     |
| Map dimensions                       | 400, 400, 400                           | wwPDB     |
| Map angles (°)                       | 90.0, 90.0, 90.0                        | wwPDB     |
| Pixel spacing (Å)                    | 1.0368, 1.0368, 1.0368                  | Depositor |

## 5 Model quality [i](#)

### 5.1 Standard geometry [i](#)

Bond lengths and bond angles in the following residue types are not validated in this section: CA

The Z score for a bond length (or angle) is the number of standard deviations the observed value is removed from the expected value. A bond length (or angle) with  $|Z| > 5$  is considered an outlier worth inspection. RMSZ is the root-mean-square of all Z scores of the bond lengths (or angles).

| Mol | Chain | Bond lengths |                | Bond angles |                 |
|-----|-------|--------------|----------------|-------------|-----------------|
|     |       | RMSZ         | # Z  >5        | RMSZ        | # Z  >5         |
| 1   | A     | 0.65         | 2/10025 (0.0%) | 1.01        | 9/15639 (0.1%)  |
| 2   | B     | 0.52         | 1/962 (0.1%)   | 0.83        | 4/1281 (0.3%)   |
| All | All   | 0.64         | 3/10987 (0.0%) | 1.00        | 13/16920 (0.1%) |

Chiral center outliers are detected by calculating the chiral volume of a chiral center and verifying if the center is modelled as a planar moiety or with the opposite hand. A planarity outlier is detected by checking planarity of atoms in a peptide group, atoms in a mainchain group or atoms of a sidechain that are expected to be planar.

| Mol | Chain | #Chirality outliers | #Planarity outliers |
|-----|-------|---------------------|---------------------|
| 2   | B     | 0                   | 1                   |

All (3) bond length outliers are listed below:

| Mol | Chain | Res | Type | Atoms  | Z     | Observed(Å) | Ideal(Å) |
|-----|-------|-----|------|--------|-------|-------------|----------|
| 2   | B     | 100 | SER  | CA-CB  | -5.19 | 1.44        | 1.53     |
| 1   | A     | 218 | U    | C1'-N1 | 5.04  | 1.56        | 1.48     |
| 1   | A     | 217 | U    | C1'-N1 | 5.00  | 1.55        | 1.48     |

All (13) bond angle outliers are listed below:

| Mol | Chain | Res | Type | Atoms       | Z     | Observed(°) | Ideal(°) |
|-----|-------|-----|------|-------------|-------|-------------|----------|
| 1   | A     | 77  | C    | O3'-P-O5'   | -8.27 | 91.60       | 104.00   |
| 1   | A     | 388 | G    | C2'-C3'-O3' | -6.92 | 103.31      | 113.70   |
| 1   | A     | 379 | G    | O3'-P-O5'   | -6.16 | 94.76       | 104.00   |
| 2   | B     | 4   | LYS  | CA-C-N      | -6.12 | 112.94      | 122.37   |
| 2   | B     | 4   | LYS  | C-N-CA      | -6.12 | 112.94      | 122.37   |
| 1   | A     | 390 | A    | O3'-P-O5'   | 6.00  | 113.00      | 104.00   |
| 1   | A     | 258 | C    | C1'-C2'-O2' | -5.67 | 99.90       | 108.40   |
| 1   | A     | 44  | G    | O3'-P-O5'   | 5.35  | 112.03      | 104.00   |

Continued on next page...

Continued from previous page...

| Mol | Chain | Res | Type | Atoms       | Z     | Observed(°) | Ideal(°) |
|-----|-------|-----|------|-------------|-------|-------------|----------|
| 2   | B     | 103 | HIS  | CB-CA-C     | -5.34 | 99.80       | 110.42   |
| 1   | A     | 271 | A    | C4'-C3'-C2' | -5.18 | 97.42       | 102.60   |
| 1   | A     | 262 | A    | C3'-C2'-C1' | -5.16 | 96.14       | 101.30   |
| 2   | B     | 105 | LEU  | N-CA-C      | -5.12 | 105.39      | 111.69   |
| 1   | A     | 76  | G    | O3'-P-O5'   | -5.07 | 96.40       | 104.00   |

There are no chirality outliers.

All (1) planarity outliers are listed below:

| Mol | Chain | Res | Type | Group     |
|-----|-------|-----|------|-----------|
| 2   | B     | 59  | ARG  | Sidechain |

## 5.2 Too-close contacts [i](#)

In the following table, the Non-H and H(model) columns list the number of non-hydrogen atoms and hydrogen atoms in the chain respectively. The H(added) column lists the number of hydrogen atoms added and optimized by MolProbity. The Clashes column lists the number of clashes within the asymmetric unit, whereas Symm-Clashes lists symmetry-related clashes.

| Mol | Chain | Non-H | H(model) | H(added) | Clashes | Symm-Clashes |
|-----|-------|-------|----------|----------|---------|--------------|
| 1   | A     | 8953  | 0        | 4505     | 314     | 0            |
| 2   | B     | 947   | 0        | 1008     | 44      | 0            |
| 3   | A     | 25    | 0        | 0        | 3       | 0            |
| All | All   | 9925  | 0        | 5513     | 352     | 0            |

The all-atom clashscore is defined as the number of clashes found per 1000 atoms (including hydrogen atoms). The all-atom clashscore for this structure is 25.

All (352) close contacts within the same asymmetric unit are listed below, sorted by their clash magnitude.

| Atom-1        | Atom-2        | Interatomic distance (Å) | Clash overlap (Å) |
|---------------|---------------|--------------------------|-------------------|
| 1:A:158:U:H2' | 1:A:159:C:C6  | 1.59                     | 1.37              |
| 1:A:158:U:O2' | 1:A:159:C:O5' | 1.63                     | 1.15              |
| 1:A:155:A:H8  | 1:A:155:A:O5' | 1.30                     | 1.11              |
| 1:A:141:C:H5' | 1:A:239:A:H61 | 1.17                     | 1.05              |
| 1:A:157:G:OP2 | 1:A:158:U:O4  | 1.76                     | 1.03              |
| 1:A:158:U:H2' | 1:A:159:C:C5  | 1.93                     | 1.02              |
| 1:A:156:C:O2  | 1:A:156:C:H2' | 1.57                     | 1.02              |
| 1:A:293:U:P   | 3:A:517:CA:CA | 1.77                     | 1.01              |

Continued on next page...

Continued from previous page...

| Atom-1          | Atom-2           | Interatomic distance (Å) | Clash overlap (Å) |
|-----------------|------------------|--------------------------|-------------------|
| 1:A:158:U:H2'   | 1:A:159:C:H6     | 1.21                     | 0.96              |
| 1:A:155:A:O5'   | 1:A:155:A:C8     | 2.21                     | 0.93              |
| 1:A:262:A:H2    | 1:A:270:U:H3     | 1.15                     | 0.92              |
| 1:A:157:G:OP2   | 1:A:158:U:C4     | 2.22                     | 0.92              |
| 1:A:215:U:H2'   | 1:A:217:U:H5     | 1.35                     | 0.91              |
| 1:A:155:A:H2'   | 1:A:156:C:H1'    | 1.50                     | 0.91              |
| 1:A:155:A:H2'   | 1:A:156:C:C1'    | 2.01                     | 0.91              |
| 1:A:236:G:H2'   | 1:A:237:G:C8     | 2.08                     | 0.88              |
| 1:A:141:C:H5'   | 1:A:239:A:N6     | 1.89                     | 0.88              |
| 1:A:371:U:H5''  | 1:A:372:G:H5'    | 1.57                     | 0.87              |
| 1:A:158:U:C2'   | 1:A:159:C:O5'    | 2.24                     | 0.86              |
| 1:A:349:G:N2    | 1:A:379:G:H1'    | 1.89                     | 0.85              |
| 1:A:215:U:O2'   | 1:A:217:U:O4     | 1.97                     | 0.82              |
| 1:A:293:U:OP2   | 3:A:517:CA:CA    | 0.41                     | 0.82              |
| 1:A:262:A:H2'   | 1:A:263:A:H5'    | 1.60                     | 0.81              |
| 1:A:157:G:OP2   | 1:A:158:U:C5     | 2.33                     | 0.81              |
| 1:A:215:U:H2'   | 1:A:217:U:C5     | 2.17                     | 0.80              |
| 1:A:349:G:H22   | 1:A:379:G:H1'    | 1.44                     | 0.80              |
| 1:A:156:C:O2    | 1:A:156:C:C2'    | 2.28                     | 0.78              |
| 1:A:367:C:H2'   | 1:A:368:G:C8     | 2.19                     | 0.78              |
| 2:B:64:ILE:HG23 | 2:B:101:LEU:HD21 | 1.68                     | 0.76              |
| 1:A:158:U:HO2'  | 1:A:159:C:C5'    | 1.99                     | 0.75              |
| 1:A:158:U:C2'   | 1:A:159:C:C6     | 2.55                     | 0.74              |
| 1:A:350:A:H1'   | 1:A:380:A:N1     | 2.02                     | 0.74              |
| 1:A:157:G:H3'   | 1:A:158:U:C5     | 2.24                     | 0.73              |
| 1:A:3:U:H2'     | 1:A:4:A:C8       | 2.24                     | 0.72              |
| 1:A:414:C:H2'   | 1:A:415:G:H8     | 1.53                     | 0.71              |
| 1:A:313:C:H2'   | 1:A:314:G:C8     | 2.25                     | 0.71              |
| 1:A:36:C:C4     | 1:A:37:G:N7      | 2.59                     | 0.71              |
| 1:A:7:C:H2'     | 1:A:8:A:C8       | 2.25                     | 0.71              |
| 1:A:158:U:H6    | 1:A:158:U:O5'    | 1.74                     | 0.70              |
| 1:A:215:U:O2    | 1:A:218:U:O4     | 2.09                     | 0.70              |
| 1:A:36:C:C2     | 1:A:37:G:C8      | 2.80                     | 0.69              |
| 2:B:63:TYR:HB3  | 2:B:97:VAL:HG11  | 1.73                     | 0.69              |
| 1:A:363:A:C8    | 1:A:363:A:H5''   | 2.28                     | 0.69              |
| 2:B:0:GLY:HA3   | 2:B:65:ARG:HB3   | 1.75                     | 0.68              |
| 1:A:45:A:C2     | 1:A:388:G:H2'    | 2.28                     | 0.68              |
| 1:A:155:A:H2'   | 1:A:156:C:C4'    | 2.24                     | 0.68              |
| 1:A:414:C:H2'   | 1:A:415:G:C8     | 2.28                     | 0.68              |
| 1:A:52:U:C6     | 1:A:52:U:H5''    | 2.30                     | 0.67              |
| 1:A:350:A:H1'   | 1:A:380:A:C6     | 2.28                     | 0.67              |

Continued on next page...

Continued from previous page...

| Atom-1          | Atom-2           | Interatomic distance (Å) | Clash overlap (Å) |
|-----------------|------------------|--------------------------|-------------------|
| 1:A:130:U:H2'   | 1:A:131:G:C8     | 2.29                     | 0.67              |
| 1:A:155:A:C2'   | 1:A:156:C:H4'    | 2.24                     | 0.66              |
| 1:A:334:A:H62   | 2:B:10:ASN:HD22  | 1.42                     | 0.66              |
| 1:A:180:U:H2'   | 1:A:181:A:H8     | 1.60                     | 0.66              |
| 1:A:206:G:H1    | 1:A:227:G:H22    | 1.42                     | 0.66              |
| 1:A:155:A:C4    | 1:A:156:C:H1'    | 2.32                     | 0.65              |
| 2:B:101:LEU:O   | 2:B:105:LEU:HB2  | 1.97                     | 0.65              |
| 1:A:274:G:H2'   | 1:A:275:G:H5'    | 1.78                     | 0.65              |
| 1:A:381:A:C2    | 1:A:382:G:H1'    | 2.33                     | 0.64              |
| 1:A:180:U:H2'   | 1:A:181:A:C8     | 2.33                     | 0.64              |
| 1:A:262:A:C2'   | 1:A:263:A:H5'    | 2.27                     | 0.64              |
| 1:A:274:G:C2'   | 1:A:275:G:H5'    | 2.28                     | 0.64              |
| 1:A:380:A:C2    | 1:A:381:A:H1'    | 2.33                     | 0.64              |
| 2:B:110:GLY:O   | 2:B:111:LEU:HD23 | 1.99                     | 0.63              |
| 1:A:236:G:H2'   | 1:A:237:G:H8     | 1.59                     | 0.62              |
| 1:A:316:C:H2'   | 1:A:317:G:C8     | 2.35                     | 0.62              |
| 1:A:159:C:O5'   | 1:A:159:C:H6     | 1.83                     | 0.62              |
| 1:A:148:A:H61   | 1:A:177:G:H1'    | 1.64                     | 0.62              |
| 1:A:270:U:C2'   | 1:A:271:A:H5'    | 2.30                     | 0.61              |
| 1:A:158:U:C2'   | 1:A:159:C:H6     | 2.05                     | 0.61              |
| 1:A:157:G:H3'   | 1:A:158:U:C6     | 2.36                     | 0.61              |
| 2:B:56:VAL:O    | 2:B:60:ILE:HG13  | 2.00                     | 0.61              |
| 1:A:71:G:O2'    | 1:A:73:G:N7      | 2.31                     | 0.61              |
| 1:A:141:C:C5'   | 1:A:239:A:H61    | 2.03                     | 0.61              |
| 1:A:349:G:H21   | 1:A:350:A:H62    | 1.48                     | 0.61              |
| 1:A:390:A:OP2   | 3:A:520:CA:CA    | 1.78                     | 0.61              |
| 1:A:71:G:H1'    | 1:A:291:A:H61    | 1.66                     | 0.60              |
| 1:A:82:A:H2'    | 1:A:83:G:O4'     | 2.01                     | 0.60              |
| 1:A:85:G:O2'    | 1:A:87:U:O4      | 2.19                     | 0.60              |
| 1:A:140:G:O6    | 1:A:239:A:H2'    | 1.99                     | 0.60              |
| 1:A:198:G:H1    | 1:A:235:C:H1'    | 1.65                     | 0.60              |
| 1:A:161:G:H3'   | 1:A:162:G:H8     | 1.67                     | 0.60              |
| 1:A:155:A:H2'   | 1:A:156:C:H4'    | 1.84                     | 0.60              |
| 2:B:112:LYS:HB2 | 2:B:114:GLU:HG2  | 1.83                     | 0.60              |
| 1:A:38:G:H2'    | 1:A:39:C:C6      | 2.37                     | 0.59              |
| 2:B:12:GLU:HG2  | 2:B:42:ARG:HH22  | 1.67                     | 0.59              |
| 1:A:32:G:H22    | 1:A:34:U:H1'     | 1.67                     | 0.59              |
| 1:A:360:G:H22   | 1:A:363:A:H5''   | 1.67                     | 0.59              |
| 1:A:219:C:H2'   | 1:A:220:C:C6     | 2.37                     | 0.59              |
| 1:A:158:U:C2'   | 1:A:159:C:C5     | 2.77                     | 0.59              |
| 1:A:158:U:O5'   | 1:A:158:U:C6     | 2.56                     | 0.59              |

Continued on next page...

Continued from previous page...

| Atom-1          | Atom-2          | Interatomic distance (Å) | Clash overlap (Å) |
|-----------------|-----------------|--------------------------|-------------------|
| 1:A:158:U:C2    | 1:A:159:C:C5    | 2.90                     | 0.59              |
| 1:A:334:A:H62   | 2:B:10:ASN:ND2  | 2.01                     | 0.58              |
| 1:A:9:U:H2'     | 1:A:10:G:C8     | 2.39                     | 0.58              |
| 1:A:360:G:N2    | 1:A:363:A:H5''  | 2.18                     | 0.58              |
| 1:A:130:U:H2'   | 1:A:131:G:H8    | 1.67                     | 0.58              |
| 1:A:36:C:N3     | 1:A:37:G:N7     | 2.52                     | 0.58              |
| 1:A:114:G:H3'   | 1:A:115:C:H6    | 1.69                     | 0.58              |
| 1:A:251:C:C2'   | 1:A:252:G:H5'   | 2.34                     | 0.58              |
| 1:A:158:U:O2'   | 1:A:159:C:C5'   | 2.48                     | 0.58              |
| 1:A:10:G:N1     | 1:A:405:C:O2    | 2.30                     | 0.57              |
| 1:A:114:G:H3'   | 1:A:115:C:C6    | 2.40                     | 0.57              |
| 1:A:315:G:H2'   | 1:A:316:C:C6    | 2.40                     | 0.57              |
| 2:B:3:LYS:C     | 2:B:5:TYR:H     | 2.12                     | 0.57              |
| 1:A:47:G:H1     | 1:A:385:A:H62   | 1.52                     | 0.57              |
| 1:A:110:U:H2'   | 1:A:111:A:C8    | 2.40                     | 0.56              |
| 2:B:105:LEU:HB3 | 2:B:111:LEU:HG  | 1.87                     | 0.56              |
| 1:A:18:A:H2'    | 1:A:19:A:C8     | 2.42                     | 0.56              |
| 1:A:141:C:N4    | 1:A:238:U:H3'   | 2.21                     | 0.56              |
| 1:A:349:G:H1'   | 1:A:350:A:C8    | 2.41                     | 0.56              |
| 1:A:14:G:C2'    | 1:A:401:A:H61   | 2.18                     | 0.55              |
| 1:A:267:U:H2'   | 1:A:268:G:C8    | 2.41                     | 0.55              |
| 1:A:217:U:H3'   | 1:A:218:U:C5    | 2.41                     | 0.55              |
| 1:A:378:C:H3'   | 1:A:379:G:H8    | 1.70                     | 0.55              |
| 1:A:360:G:H22   | 1:A:363:A:C5'   | 2.19                     | 0.55              |
| 1:A:374:A:H2'   | 1:A:375:G:C8    | 2.41                     | 0.55              |
| 1:A:186:G:H5'   | 1:A:187:A:OP2   | 2.06                     | 0.55              |
| 1:A:236:G:C2'   | 1:A:237:G:C8    | 2.86                     | 0.55              |
| 1:A:115:C:H2'   | 1:A:116:A:C8    | 2.41                     | 0.55              |
| 1:A:241:A:H2'   | 1:A:242:C:C5    | 2.41                     | 0.55              |
| 1:A:308:A:H2'   | 1:A:309:C:C6    | 2.41                     | 0.55              |
| 1:A:136:G:H2'   | 1:A:138:C:C5    | 2.42                     | 0.55              |
| 1:A:176:C:H2'   | 1:A:177:G:H5'   | 1.88                     | 0.55              |
| 1:A:159:C:H2'   | 1:A:160:C:C6    | 2.42                     | 0.54              |
| 1:A:308:A:N1    | 1:A:329:U:H5    | 2.06                     | 0.54              |
| 2:B:92:MET:HB3  | 2:B:97:VAL:HG23 | 1.88                     | 0.54              |
| 2:B:100:SER:O   | 2:B:101:LEU:C   | 2.47                     | 0.54              |
| 1:A:10:G:H2'    | 1:A:11:C:C6     | 2.43                     | 0.54              |
| 1:A:154:U:H3'   | 1:A:155:A:C8    | 2.43                     | 0.54              |
| 1:A:146:A:H3'   | 1:A:178:A:H61   | 1.73                     | 0.54              |
| 1:A:360:G:O2'   | 1:A:364:A:N6    | 2.42                     | 0.53              |
| 1:A:155:A:C2'   | 1:A:156:C:C4'   | 2.86                     | 0.53              |

Continued on next page...

Continued from previous page...

| Atom-1         | Atom-2          | Interatomic distance (Å) | Clash overlap (Å) |
|----------------|-----------------|--------------------------|-------------------|
| 1:A:198:G:H2'  | 1:A:198:G:N3    | 2.24                     | 0.53              |
| 1:A:270:U:H2'  | 1:A:271:A:H5'   | 1.88                     | 0.53              |
| 1:A:378:C:H3'  | 1:A:379:G:C8    | 2.44                     | 0.53              |
| 1:A:136:G:O2'  | 1:A:137:A:H5'   | 2.09                     | 0.53              |
| 1:A:203:G:H1   | 1:A:229:G:H22   | 1.55                     | 0.53              |
| 1:A:236:G:C2'  | 1:A:237:G:H8    | 2.20                     | 0.53              |
| 2:B:102:ILE:O  | 2:B:103:HIS:C   | 2.52                     | 0.53              |
| 1:A:85:G:H4'   | 1:A:85:G:OP1    | 2.09                     | 0.53              |
| 1:A:222:U:H2'  | 1:A:223:A:C8    | 2.43                     | 0.53              |
| 1:A:262:A:H2   | 1:A:270:U:N3    | 1.97                     | 0.52              |
| 2:B:3:LYS:C    | 2:B:5:TYR:N     | 2.67                     | 0.52              |
| 1:A:350:A:C2   | 1:A:380:A:H1'   | 2.45                     | 0.51              |
| 1:A:38:G:H2'   | 1:A:39:C:H6     | 1.75                     | 0.51              |
| 1:A:158:U:C2   | 1:A:159:C:C4    | 2.99                     | 0.51              |
| 1:A:292:A:C8   | 1:A:292:A:H5''  | 2.44                     | 0.51              |
| 1:A:134:C:H2'  | 1:A:135:U:O4'   | 2.10                     | 0.51              |
| 1:A:363:A:H5'' | 1:A:363:A:H8    | 1.74                     | 0.51              |
| 1:A:157:G:O5'  | 1:A:157:G:H8    | 1.93                     | 0.51              |
| 1:A:9:U:H2'    | 1:A:10:G:H8     | 1.75                     | 0.51              |
| 1:A:16:G:C2    | 1:A:344:C:C2    | 2.99                     | 0.51              |
| 1:A:233:C:H2'  | 1:A:234:G:C8    | 2.46                     | 0.51              |
| 1:A:307:G:C2   | 1:A:308:A:C5    | 2.99                     | 0.51              |
| 1:A:70:U:H2'   | 1:A:71:G:O4'    | 2.10                     | 0.50              |
| 1:A:71:G:N2    | 1:A:73:G:H3'    | 2.26                     | 0.50              |
| 1:A:155:A:C2'  | 1:A:156:C:H1'   | 2.31                     | 0.50              |
| 2:B:113:LYS:NZ | 2:B:115:ALA:OXT | 2.44                     | 0.50              |
| 1:A:148:A:N6   | 1:A:177:G:H1'   | 2.26                     | 0.50              |
| 1:A:305:A:H2'  | 1:A:306:G:O4'   | 2.11                     | 0.50              |
| 1:A:14:G:H1'   | 1:A:402:G:N2    | 2.26                     | 0.50              |
| 1:A:6:U:H2'    | 1:A:7:C:C6      | 2.47                     | 0.50              |
| 1:A:358:G:N2   | 1:A:367:C:O2    | 2.45                     | 0.50              |
| 1:A:155:A:N3   | 1:A:156:C:H1'   | 2.27                     | 0.49              |
| 1:A:348:G:H3'  | 1:A:349:G:C8    | 2.46                     | 0.49              |
| 1:A:23:C:H5''  | 2:B:1:MET:HA    | 1.94                     | 0.49              |
| 1:A:317:G:N1   | 1:A:321:G:C2    | 2.79                     | 0.49              |
| 1:A:155:A:H2'  | 1:A:156:C:O4'   | 2.13                     | 0.49              |
| 1:A:122:G:H3'  | 1:A:123:C:H5''  | 1.94                     | 0.49              |
| 1:A:371:U:H4'  | 1:A:373:C:H5    | 1.78                     | 0.49              |
| 1:A:193:C:N4   | 1:A:237:G:C6    | 2.72                     | 0.49              |
| 1:A:15:G:N2    | 1:A:345:G:H1'   | 2.28                     | 0.49              |
| 1:A:161:G:H3'  | 1:A:162:G:C8    | 2.45                     | 0.49              |

Continued on next page...

Continued from previous page...

| Atom-1           | Atom-2           | Interatomic distance (Å) | Clash overlap (Å) |
|------------------|------------------|--------------------------|-------------------|
| 2:B:75:VAL:HG22  | 2:B:111:LEU:CD2  | 2.42                     | 0.49              |
| 1:A:263:A:O5'    | 1:A:263:A:H8     | 1.96                     | 0.49              |
| 1:A:56:U:H2'     | 1:A:57:G:O4'     | 2.13                     | 0.49              |
| 1:A:75:U:HO2'    | 1:A:76:G:P       | 2.36                     | 0.49              |
| 1:A:241:A:HO2'   | 1:A:242:C:H6     | 1.61                     | 0.49              |
| 1:A:361:C:O2'    | 1:A:362:A:H3'    | 2.12                     | 0.49              |
| 2:B:112:LYS:O    | 2:B:114:GLU:N    | 2.46                     | 0.49              |
| 1:A:240:A:N3     | 1:A:240:A:H2'    | 2.26                     | 0.48              |
| 1:A:412:A:H2'    | 1:A:413:A:C8     | 2.47                     | 0.48              |
| 1:A:4:A:H2'      | 1:A:5:A:C8       | 2.48                     | 0.48              |
| 1:A:216:U:H3'    | 1:A:217:U:C6     | 2.47                     | 0.48              |
| 1:A:411:U:H2'    | 1:A:412:A:C8     | 2.47                     | 0.48              |
| 2:B:96:GLU:HA    | 2:B:99:LYS:HE2   | 1.94                     | 0.48              |
| 1:A:398:U:O5'    | 1:A:398:U:H6     | 1.96                     | 0.48              |
| 1:A:5:A:C2       | 1:A:411:U:C2     | 3.02                     | 0.48              |
| 1:A:376:U:H2'    | 1:A:377:A:C8     | 2.47                     | 0.48              |
| 1:A:380:A:C6     | 1:A:381:A:C4     | 3.00                     | 0.48              |
| 1:A:331:G:H4'    | 1:A:332:A:H5'    | 1.95                     | 0.48              |
| 1:A:124:U:H2'    | 1:A:125:U:O4'    | 2.13                     | 0.48              |
| 1:A:190:G:H2'    | 1:A:191:U:O4'    | 2.13                     | 0.48              |
| 1:A:30:C:H2'     | 1:A:31:G:C8      | 2.49                     | 0.47              |
| 1:A:89:G:H2'     | 1:A:90:U:C6      | 2.49                     | 0.47              |
| 1:A:313:C:H2'    | 1:A:314:G:H8     | 1.74                     | 0.47              |
| 2:B:75:VAL:HG22  | 2:B:111:LEU:HD21 | 1.95                     | 0.47              |
| 1:A:187:A:H8     | 1:A:187:A:OP1    | 1.98                     | 0.47              |
| 1:A:167:G:H2'    | 1:A:168:A:C8     | 2.50                     | 0.47              |
| 1:A:352:U:H2'    | 1:A:353:A:C8     | 2.49                     | 0.47              |
| 1:A:356:A:H1'    | 1:A:373:C:H42    | 1.80                     | 0.47              |
| 1:A:13:C:C2      | 1:A:403:A:C2     | 3.03                     | 0.47              |
| 1:A:210:U:H2'    | 1:A:211:A:C8     | 2.50                     | 0.47              |
| 1:A:216:U:H3'    | 1:A:217:U:H6     | 1.79                     | 0.47              |
| 2:B:113:LYS:HE3  | 2:B:113:LYS:HB3  | 1.54                     | 0.47              |
| 1:A:406:A:C6     | 1:A:407:U:C4     | 3.04                     | 0.46              |
| 2:B:105:LEU:HD12 | 2:B:105:LEU:HA   | 1.76                     | 0.46              |
| 1:A:119:C:H2'    | 1:A:120:U:C6     | 2.51                     | 0.46              |
| 1:A:8:A:H3'      | 1:A:9:U:H6       | 1.80                     | 0.46              |
| 1:A:203:G:H1     | 1:A:229:G:N2     | 2.13                     | 0.46              |
| 1:A:71:G:H1'     | 1:A:291:A:N6     | 2.29                     | 0.46              |
| 1:A:239:A:O2'    | 1:A:242:C:H5     | 1.99                     | 0.46              |
| 1:A:319:A:H1'    | 1:A:320:U:C5     | 2.51                     | 0.46              |
| 2:B:103:HIS:O    | 2:B:105:LEU:N    | 2.48                     | 0.46              |

Continued on next page...

Continued from previous page...

| Atom-1         | Atom-2           | Interatomic distance (Å) | Clash overlap (Å) |
|----------------|------------------|--------------------------|-------------------|
| 2:B:113:LYS:O  | 2:B:115:ALA:N    | 2.49                     | 0.46              |
| 1:A:45:A:H62   | 2:B:62:ARG:NH2   | 2.12                     | 0.46              |
| 1:A:206:G:H1   | 1:A:227:G:N2     | 2.11                     | 0.46              |
| 1:A:261:A:C2   | 1:A:272:G:C6     | 3.04                     | 0.46              |
| 1:A:240:A:H4'  | 1:A:241:A:OP2    | 2.16                     | 0.46              |
| 1:A:149:G:H3'  | 1:A:150:A:H8     | 1.81                     | 0.45              |
| 1:A:241:A:H2'  | 1:A:242:C:C6     | 2.50                     | 0.45              |
| 1:A:217:U:H3'  | 1:A:218:U:C6     | 2.52                     | 0.45              |
| 1:A:308:A:N1   | 1:A:329:U:C5     | 2.83                     | 0.45              |
| 1:A:408:G:C2   | 1:A:409:A:C4     | 3.04                     | 0.45              |
| 1:A:143:G:C2   | 1:A:144:G:C8     | 3.04                     | 0.45              |
| 1:A:164:U:H2'  | 1:A:165:G:O4'    | 2.16                     | 0.45              |
| 1:A:36:C:N3    | 1:A:37:G:C5      | 2.85                     | 0.45              |
| 1:A:239:A:H1'  | 1:A:242:C:H41    | 1.81                     | 0.45              |
| 1:A:77:C:H2'   | 1:A:78:C:O4'     | 2.16                     | 0.45              |
| 1:A:157:G:OP2  | 1:A:158:U:H5     | 1.96                     | 0.45              |
| 1:A:97:C:C2'   | 1:A:98:G:H5'     | 2.47                     | 0.45              |
| 2:B:12:GLU:HG2 | 2:B:42:ARG:NH2   | 2.32                     | 0.45              |
| 2:B:24:ALA:HB2 | 2:B:29:VAL:HG13  | 1.98                     | 0.45              |
| 1:A:79:C:H2'   | 1:A:80:G:O4'     | 2.17                     | 0.45              |
| 1:A:68:G:N3    | 1:A:68:G:H2'     | 2.31                     | 0.45              |
| 1:A:157:G:O5'  | 1:A:157:G:C8     | 2.69                     | 0.45              |
| 1:A:238:U:H2'  | 1:A:241:A:N7     | 2.32                     | 0.45              |
| 2:B:98:LYS:O   | 2:B:99:LYS:C     | 2.59                     | 0.45              |
| 1:A:37:G:N1    | 1:A:38:G:C5      | 2.85                     | 0.44              |
| 1:A:150:A:H3'  | 1:A:151:A:H8     | 1.82                     | 0.44              |
| 1:A:204:G:H2'  | 1:A:205:A:C8     | 2.52                     | 0.44              |
| 1:A:416:U:H2'  | 1:A:417:C:O4'    | 2.17                     | 0.44              |
| 2:B:74:GLU:CD  | 2:B:111:LEU:HD22 | 2.42                     | 0.44              |
| 2:B:112:LYS:C  | 2:B:114:GLU:N    | 2.74                     | 0.44              |
| 1:A:99:A:H2'   | 1:A:100:A:C8     | 2.52                     | 0.44              |
| 1:A:193:C:N4   | 1:A:237:G:H1     | 2.15                     | 0.44              |
| 2:B:74:GLU:OE1 | 2:B:111:LEU:HD22 | 2.18                     | 0.44              |
| 1:A:197:A:O3'  | 1:A:198:G:H3'    | 2.18                     | 0.44              |
| 1:A:377:A:H3'  | 1:A:378:C:C6     | 2.52                     | 0.44              |
| 1:A:32:G:H2'   | 1:A:32:G:N3      | 2.32                     | 0.44              |
| 1:A:115:C:H2'  | 1:A:116:A:H8     | 1.83                     | 0.44              |
| 1:A:251:C:H2'  | 1:A:252:G:H5'    | 1.99                     | 0.44              |
| 1:A:309:C:O2'  | 1:A:310:A:H5'    | 2.18                     | 0.44              |
| 2:B:103:HIS:O  | 2:B:104:VAL:C    | 2.60                     | 0.44              |
| 1:A:301:G:H2'  | 1:A:302:G:H5'    | 2.00                     | 0.44              |

Continued on next page...

Continued from previous page...

| Atom-1         | Atom-2         | Interatomic distance (Å) | Clash overlap (Å) |
|----------------|----------------|--------------------------|-------------------|
| 1:A:36:C:N3    | 1:A:37:G:C8    | 2.86                     | 0.44              |
| 1:A:52:U:H6    | 1:A:52:U:H2'   | 1.62                     | 0.44              |
| 1:A:193:C:N4   | 1:A:237:G:N1   | 2.64                     | 0.44              |
| 1:A:202:C:H2'  | 1:A:203:G:C8   | 2.52                     | 0.44              |
| 1:A:275:G:OP2  | 1:A:276:C:O2'  | 2.36                     | 0.44              |
| 1:A:360:G:H3'  | 1:A:361:C:H6   | 1.82                     | 0.44              |
| 1:A:385:A:H8   | 1:A:400:U:O2'  | 1.99                     | 0.44              |
| 1:A:187:A:N3   | 1:A:245:C:O2'  | 2.41                     | 0.44              |
| 1:A:19:A:H2'   | 1:A:20:U:C6    | 2.52                     | 0.43              |
| 1:A:301:G:C2'  | 1:A:302:G:H5'  | 2.48                     | 0.43              |
| 1:A:14:G:C2    | 1:A:402:G:C6   | 3.06                     | 0.43              |
| 1:A:161:G:N2   | 1:A:164:U:H3'  | 2.33                     | 0.43              |
| 1:A:408:G:H2'  | 1:A:409:A:O4'  | 2.18                     | 0.43              |
| 1:A:409:A:C8   | 1:A:409:A:H5'' | 2.52                     | 0.43              |
| 1:A:23:C:H5''  | 2:B:1:MET:CA   | 2.48                     | 0.43              |
| 1:A:169:U:H2'  | 1:A:170:A:C8   | 2.53                     | 0.43              |
| 1:A:239:A:O2'  | 1:A:242:C:OP2  | 2.35                     | 0.43              |
| 1:A:399:A:H2'  | 1:A:400:U:H5'  | 2.01                     | 0.43              |
| 2:B:99:LYS:HE2 | 2:B:99:LYS:HB2 | 1.52                     | 0.43              |
| 2:B:103:HIS:C  | 2:B:105:LEU:N  | 2.71                     | 0.43              |
| 1:A:317:G:C5   | 1:A:318:C:N3   | 2.86                     | 0.43              |
| 1:A:401:A:H2'  | 1:A:402:G:O4'  | 2.18                     | 0.43              |
| 1:A:7:C:H2'    | 1:A:8:A:H8     | 1.79                     | 0.43              |
| 1:A:50:A:H5'   | 1:A:388:G:H5'' | 2.00                     | 0.43              |
| 1:A:314:G:C5   | 1:A:315:G:N7   | 2.87                     | 0.43              |
| 1:A:339:A:H1'  | 2:B:66:GLN:NE2 | 2.32                     | 0.43              |
| 1:A:377:A:H3'  | 1:A:378:C:H6   | 1.84                     | 0.43              |
| 1:A:123:C:H2'  | 1:A:124:U:O4'  | 2.18                     | 0.43              |
| 1:A:356:A:H3'  | 1:A:357:G:H8   | 1.83                     | 0.43              |
| 1:A:4:A:C2     | 1:A:412:A:C2   | 3.06                     | 0.43              |
| 1:A:32:G:N2    | 1:A:34:U:H1'   | 2.32                     | 0.43              |
| 1:A:157:G:N2   | 1:A:170:A:H1'  | 2.34                     | 0.43              |
| 1:A:45:A:H5''  | 1:A:389:A:N6   | 2.33                     | 0.43              |
| 1:A:177:G:C6   | 1:A:178:A:C6   | 3.07                     | 0.43              |
| 1:A:89:G:C2    | 1:A:248:G:C2   | 3.06                     | 0.42              |
| 1:A:94:U:H2'   | 1:A:95:A:C8    | 2.55                     | 0.42              |
| 1:A:110:U:H2'  | 1:A:111:A:H8   | 1.84                     | 0.42              |
| 1:A:139:G:H21  | 1:A:188:A:H2   | 1.67                     | 0.42              |
| 1:A:221:U:H2'  | 1:A:222:U:C6   | 2.53                     | 0.42              |
| 1:A:363:A:H2'  | 1:A:364:A:C8   | 2.54                     | 0.42              |
| 2:B:1:MET:HE3  | 2:B:1:MET:HB3  | 1.69                     | 0.42              |

Continued on next page...

Continued from previous page...

| Atom-1         | Atom-2           | Interatomic distance (Å) | Clash overlap (Å) |
|----------------|------------------|--------------------------|-------------------|
| 1:A:59:U:H1'   | 1:A:257:A:N3     | 2.34                     | 0.42              |
| 1:A:174:U:H2'  | 1:A:175:U:C6     | 2.54                     | 0.42              |
| 1:A:373:C:H2'  | 1:A:374:A:C8     | 2.54                     | 0.42              |
| 2:B:11:GLU:O   | 2:B:15:GLU:HG3   | 2.19                     | 0.42              |
| 2:B:74:GLU:OE2 | 2:B:111:LEU:HD22 | 2.19                     | 0.42              |
| 1:A:255:A:OP1  | 1:A:256:A:O2'    | 2.34                     | 0.42              |
| 1:A:385:A:C8   | 1:A:400:U:O2'    | 2.73                     | 0.42              |
| 1:A:217:U:H3'  | 1:A:218:U:H5     | 1.84                     | 0.42              |
| 1:A:8:A:N6     | 1:A:406:A:H61    | 2.18                     | 0.42              |
| 1:A:330:A:O2'  | 1:A:336:A:N1     | 2.50                     | 0.42              |
| 1:A:14:G:H2'   | 1:A:385:A:N1     | 2.34                     | 0.42              |
| 1:A:136:G:H2'  | 1:A:138:C:H5     | 1.82                     | 0.42              |
| 1:A:235:C:H2'  | 1:A:236:G:O4'    | 2.20                     | 0.42              |
| 1:A:321:G:H2'  | 1:A:322:C:C6     | 2.55                     | 0.42              |
| 1:A:322:C:H2'  | 1:A:323:A:C8     | 2.55                     | 0.42              |
| 1:A:236:G:C3'  | 1:A:237:G:H8     | 2.33                     | 0.42              |
| 1:A:354:C:H2'  | 1:A:355:G:O4'    | 2.20                     | 0.42              |
| 1:A:353:A:H62  | 1:A:371:U:H3     | 1.68                     | 0.41              |
| 2:B:73:GLU:N   | 2:B:73:GLU:OE1   | 2.52                     | 0.41              |
| 1:A:153:C:H2'  | 1:A:154:U:C6     | 2.55                     | 0.41              |
| 1:A:186:G:N2   | 1:A:189:A:C4     | 2.88                     | 0.41              |
| 2:B:75:VAL:CG2 | 2:B:111:LEU:HD21 | 2.50                     | 0.41              |
| 1:A:172:G:H2'  | 1:A:173:G:C8     | 2.55                     | 0.41              |
| 1:A:353:A:H3'  | 1:A:354:C:C6     | 2.55                     | 0.41              |
| 1:A:149:G:C6   | 1:A:177:G:C2     | 3.08                     | 0.41              |
| 1:A:262:A:H8   | 1:A:262:A:O5'    | 2.02                     | 0.41              |
| 1:A:158:U:H2'  | 1:A:159:C:O5'    | 2.15                     | 0.41              |
| 1:A:263:A:H1'  | 1:A:269:G:O6     | 2.20                     | 0.41              |
| 1:A:324:G:H2'  | 1:A:325:C:H6     | 1.84                     | 0.41              |
| 1:A:408:G:C4   | 1:A:409:A:C8     | 3.08                     | 0.41              |
| 1:A:16:G:N2    | 1:A:344:C:H1'    | 2.35                     | 0.41              |
| 1:A:37:G:C2    | 1:A:38:G:C5      | 3.09                     | 0.41              |
| 1:A:154:U:O5'  | 1:A:155:A:OP2    | 2.38                     | 0.41              |
| 1:A:234:G:H2'  | 1:A:235:C:C6     | 2.56                     | 0.41              |
| 1:A:350:A:C4   | 1:A:380:A:C5     | 3.08                     | 0.41              |
| 2:B:103:HIS:O  | 2:B:106:ARG:N    | 2.54                     | 0.41              |
| 1:A:165:G:C4   | 1:A:166:G:H1'    | 2.55                     | 0.41              |
| 1:A:246:A:H2'  | 1:A:247:C:O4'    | 2.21                     | 0.41              |
| 1:A:300:A:H2'  | 1:A:301:G:O4'    | 2.20                     | 0.41              |
| 1:A:262:A:H3'  | 1:A:262:A:C8     | 2.55                     | 0.41              |
| 1:A:128:G:H2'  | 1:A:129:C:C6     | 2.56                     | 0.41              |

Continued on next page...

Continued from previous page...

| Atom-1        | Atom-2        | Interatomic distance (Å) | Clash overlap (Å) |
|---------------|---------------|--------------------------|-------------------|
| 1:A:215:U:C2' | 1:A:217:U:C5  | 2.98                     | 0.41              |
| 1:A:314:G:C6  | 1:A:315:G:N7  | 2.89                     | 0.41              |
| 1:A:380:A:C6  | 1:A:381:A:C5  | 3.09                     | 0.41              |
| 1:A:385:A:H1' | 1:A:401:A:C8  | 2.56                     | 0.41              |
| 1:A:408:G:H2' | 1:A:409:A:C8  | 2.56                     | 0.41              |
| 1:A:229:G:H2' | 1:A:230:G:C8  | 2.56                     | 0.40              |
| 1:A:355:G:H2' | 1:A:356:A:C8  | 2.56                     | 0.40              |
| 1:A:95:A:H2'  | 1:A:96:G:O4'  | 2.21                     | 0.40              |
| 1:A:338:G:H2' | 1:A:339:A:C8  | 2.56                     | 0.40              |
| 1:A:349:G:H1' | 1:A:350:A:H8  | 1.85                     | 0.40              |
| 1:A:32:G:H3'  | 1:A:33:U:C6   | 2.57                     | 0.40              |
| 1:A:151:A:H2' | 1:A:152:C:O4' | 2.21                     | 0.40              |
| 1:A:157:G:H3' | 1:A:158:U:H5  | 1.81                     | 0.40              |
| 1:A:381:A:C6  | 1:A:382:G:C4  | 3.09                     | 0.40              |
| 1:A:218:U:C5  | 1:A:219:C:H1' | 2.56                     | 0.40              |
| 1:A:338:G:H2' | 1:A:339:A:H8  | 1.87                     | 0.40              |

There are no symmetry-related clashes.

## 5.3 Torsion angles [i](#)

### 5.3.1 Protein backbone [i](#)

In the following table, the Percentiles column shows the percent Ramachandran outliers of the chain as a percentile score with respect to all PDB entries followed by that with respect to all EM entries.

The Analysed column shows the number of residues for which the backbone conformation was analysed, and the total number of residues.

| Mol | Chain | Analysed      | Favoured  | Allowed | Outliers | Percentiles        |
|-----|-------|---------------|-----------|---------|----------|--------------------|
| 2   | B     | 114/116 (98%) | 102 (90%) | 9 (8%)  | 3 (3%)   | <b>4</b> <b>13</b> |

All (3) Ramachandran outliers are listed below:

| Mol | Chain | Res | Type |
|-----|-------|-----|------|
| 2   | B     | 103 | HIS  |
| 2   | B     | 114 | GLU  |
| 2   | B     | 113 | LYS  |

### 5.3.2 Protein sidechains [i](#)

In the following table, the Percentiles column shows the percent sidechain outliers of the chain as a percentile score with respect to all PDB entries followed by that with respect to all EM entries.

The Analysed column shows the number of residues for which the sidechain conformation was analysed, and the total number of residues.

| Mol | Chain | Analysed     | Rotameric | Outliers | Percentiles |
|-----|-------|--------------|-----------|----------|-------------|
| 2   | B     | 99/99 (100%) | 87 (88%)  | 12 (12%) | 4 12        |

All (12) residues with a non-rotameric sidechain are listed below:

| Mol | Chain | Res | Type |
|-----|-------|-----|------|
| 2   | B     | 1   | MET  |
| 2   | B     | 2   | LYS  |
| 2   | B     | 3   | LYS  |
| 2   | B     | 4   | LYS  |
| 2   | B     | 71  | LEU  |
| 2   | B     | 92  | MET  |
| 2   | B     | 97  | VAL  |
| 2   | B     | 99  | LYS  |
| 2   | B     | 101 | LEU  |
| 2   | B     | 105 | LEU  |
| 2   | B     | 111 | LEU  |
| 2   | B     | 113 | LYS  |

Sometimes sidechains can be flipped to improve hydrogen bonding and reduce clashes. All (2) such sidechains are listed below:

| Mol | Chain | Res | Type |
|-----|-------|-----|------|
| 2   | B     | 10  | ASN  |
| 2   | B     | 14  | GLN  |

### 5.3.3 RNA [i](#)

| Mol | Chain | Analysed      | Backbone Outliers | Pucker Outliers |
|-----|-------|---------------|-------------------|-----------------|
| 1   | A     | 416/417 (99%) | 205 (49%)         | 15 (3%)         |

All (205) RNA backbone outliers are listed below:

| Mol | Chain | Res | Type |
|-----|-------|-----|------|
| 1   | A     | 2   | U    |
| 1   | A     | 5   | A    |
| 1   | A     | 6   | U    |
| 1   | A     | 8   | A    |
| 1   | A     | 9   | U    |
| 1   | A     | 11  | C    |
| 1   | A     | 15  | G    |
| 1   | A     | 22  | G    |
| 1   | A     | 23  | C    |
| 1   | A     | 24  | U    |
| 1   | A     | 28  | G    |
| 1   | A     | 30  | C    |
| 1   | A     | 32  | G    |
| 1   | A     | 33  | U    |
| 1   | A     | 35  | U    |
| 1   | A     | 36  | C    |
| 1   | A     | 44  | G    |
| 1   | A     | 45  | A    |
| 1   | A     | 46  | G    |
| 1   | A     | 47  | G    |
| 1   | A     | 48  | A    |
| 1   | A     | 49  | A    |
| 1   | A     | 50  | A    |
| 1   | A     | 51  | G    |
| 1   | A     | 53  | C    |
| 1   | A     | 59  | U    |
| 1   | A     | 65  | G    |
| 1   | A     | 67  | U    |
| 1   | A     | 68  | G    |
| 1   | A     | 70  | U    |
| 1   | A     | 76  | G    |
| 1   | A     | 79  | C    |
| 1   | A     | 82  | A    |
| 1   | A     | 83  | G    |
| 1   | A     | 85  | G    |
| 1   | A     | 86  | U    |
| 1   | A     | 87  | U    |
| 1   | A     | 88  | C    |
| 1   | A     | 89  | G    |
| 1   | A     | 90  | U    |
| 1   | A     | 91  | G    |
| 1   | A     | 92  | C    |
| 1   | A     | 96  | G    |

*Continued on next page...*

*Continued from previous page...*

| Mol | Chain | Res | Type |
|-----|-------|-----|------|
| 1   | A     | 98  | G    |
| 1   | A     | 99  | A    |
| 1   | A     | 101 | U    |
| 1   | A     | 102 | C    |
| 1   | A     | 103 | C    |
| 1   | A     | 104 | A    |
| 1   | A     | 105 | U    |
| 1   | A     | 108 | G    |
| 1   | A     | 115 | C    |
| 1   | A     | 118 | C    |
| 1   | A     | 121 | G    |
| 1   | A     | 122 | G    |
| 1   | A     | 123 | C    |
| 1   | A     | 126 | U    |
| 1   | A     | 127 | G    |
| 1   | A     | 128 | G    |
| 1   | A     | 129 | C    |
| 1   | A     | 130 | U    |
| 1   | A     | 132 | G    |
| 1   | A     | 133 | G    |
| 1   | A     | 134 | C    |
| 1   | A     | 135 | U    |
| 1   | A     | 136 | G    |
| 1   | A     | 137 | A    |
| 1   | A     | 139 | G    |
| 1   | A     | 141 | C    |
| 1   | A     | 142 | G    |
| 1   | A     | 145 | G    |
| 1   | A     | 146 | A    |
| 1   | A     | 147 | A    |
| 1   | A     | 149 | G    |
| 1   | A     | 150 | A    |
| 1   | A     | 151 | A    |
| 1   | A     | 152 | C    |
| 1   | A     | 154 | U    |
| 1   | A     | 155 | A    |
| 1   | A     | 156 | C    |
| 1   | A     | 157 | G    |
| 1   | A     | 159 | C    |
| 1   | A     | 163 | C    |
| 1   | A     | 167 | G    |
| 1   | A     | 171 | U    |

*Continued on next page...*

*Continued from previous page...*

| Mol | Chain | Res | Type |
|-----|-------|-----|------|
| 1   | A     | 172 | G    |
| 1   | A     | 174 | U    |
| 1   | A     | 177 | G    |
| 1   | A     | 178 | A    |
| 1   | A     | 179 | U    |
| 1   | A     | 180 | U    |
| 1   | A     | 183 | C    |
| 1   | A     | 185 | U    |
| 1   | A     | 186 | G    |
| 1   | A     | 187 | A    |
| 1   | A     | 190 | G    |
| 1   | A     | 192 | G    |
| 1   | A     | 193 | C    |
| 1   | A     | 198 | G    |
| 1   | A     | 199 | U    |
| 1   | A     | 200 | G    |
| 1   | A     | 202 | C    |
| 1   | A     | 203 | G    |
| 1   | A     | 204 | G    |
| 1   | A     | 205 | A    |
| 1   | A     | 207 | C    |
| 1   | A     | 208 | U    |
| 1   | A     | 209 | C    |
| 1   | A     | 210 | U    |
| 1   | A     | 212 | A    |
| 1   | A     | 213 | G    |
| 1   | A     | 214 | G    |
| 1   | A     | 219 | C    |
| 1   | A     | 226 | G    |
| 1   | A     | 227 | G    |
| 1   | A     | 231 | A    |
| 1   | A     | 232 | A    |
| 1   | A     | 233 | C    |
| 1   | A     | 234 | G    |
| 1   | A     | 236 | G    |
| 1   | A     | 237 | G    |
| 1   | A     | 239 | A    |
| 1   | A     | 240 | A    |
| 1   | A     | 241 | A    |
| 1   | A     | 242 | C    |
| 1   | A     | 250 | G    |
| 1   | A     | 252 | G    |

*Continued on next page...*

*Continued from previous page...*

| Mol | Chain | Res | Type |
|-----|-------|-----|------|
| 1   | A     | 253 | A    |
| 1   | A     | 255 | A    |
| 1   | A     | 259 | C    |
| 1   | A     | 264 | U    |
| 1   | A     | 265 | G    |
| 1   | A     | 266 | A    |
| 1   | A     | 267 | U    |
| 1   | A     | 271 | A    |
| 1   | A     | 275 | G    |
| 1   | A     | 278 | C    |
| 1   | A     | 285 | G    |
| 1   | A     | 286 | A    |
| 1   | A     | 290 | A    |
| 1   | A     | 292 | A    |
| 1   | A     | 293 | U    |
| 1   | A     | 294 | G    |
| 1   | A     | 295 | A    |
| 1   | A     | 296 | A    |
| 1   | A     | 304 | A    |
| 1   | A     | 307 | G    |
| 1   | A     | 312 | G    |
| 1   | A     | 313 | C    |
| 1   | A     | 314 | G    |
| 1   | A     | 317 | G    |
| 1   | A     | 318 | C    |
| 1   | A     | 321 | G    |
| 1   | A     | 322 | C    |
| 1   | A     | 323 | A    |
| 1   | A     | 324 | G    |
| 1   | A     | 328 | G    |
| 1   | A     | 329 | U    |
| 1   | A     | 330 | A    |
| 1   | A     | 333 | U    |
| 1   | A     | 334 | A    |
| 1   | A     | 335 | G    |
| 1   | A     | 336 | A    |
| 1   | A     | 337 | U    |
| 1   | A     | 343 | C    |
| 1   | A     | 344 | C    |
| 1   | A     | 347 | C    |
| 1   | A     | 349 | G    |
| 1   | A     | 350 | A    |

*Continued on next page...*

Continued from previous page...

| Mol | Chain | Res | Type |
|-----|-------|-----|------|
| 1   | A     | 351 | G    |
| 1   | A     | 358 | G    |
| 1   | A     | 359 | C    |
| 1   | A     | 361 | C    |
| 1   | A     | 362 | A    |
| 1   | A     | 363 | A    |
| 1   | A     | 364 | A    |
| 1   | A     | 365 | G    |
| 1   | A     | 366 | C    |
| 1   | A     | 367 | C    |
| 1   | A     | 368 | G    |
| 1   | A     | 369 | C    |
| 1   | A     | 372 | G    |
| 1   | A     | 373 | C    |
| 1   | A     | 375 | G    |
| 1   | A     | 376 | U    |
| 1   | A     | 379 | G    |
| 1   | A     | 380 | A    |
| 1   | A     | 381 | A    |
| 1   | A     | 382 | G    |
| 1   | A     | 383 | G    |
| 1   | A     | 384 | U    |
| 1   | A     | 385 | A    |
| 1   | A     | 387 | A    |
| 1   | A     | 389 | A    |
| 1   | A     | 391 | C    |
| 1   | A     | 392 | A    |
| 1   | A     | 400 | U    |
| 1   | A     | 401 | A    |
| 1   | A     | 402 | G    |
| 1   | A     | 406 | A    |
| 1   | A     | 407 | U    |
| 1   | A     | 408 | G    |
| 1   | A     | 409 | A    |
| 1   | A     | 410 | U    |
| 1   | A     | 411 | U    |

All (15) RNA pucker outliers are listed below:

| Mol | Chain | Res | Type |
|-----|-------|-----|------|
| 1   | A     | 45  | A    |
| 1   | A     | 52  | U    |

Continued on next page...

*Continued from previous page...*

| Mol | Chain | Res | Type |
|-----|-------|-----|------|
| 1   | A     | 67  | U    |
| 1   | A     | 75  | U    |
| 1   | A     | 126 | U    |
| 1   | A     | 136 | G    |
| 1   | A     | 158 | U    |
| 1   | A     | 232 | A    |
| 1   | A     | 240 | A    |
| 1   | A     | 255 | A    |
| 1   | A     | 292 | A    |
| 1   | A     | 334 | A    |
| 1   | A     | 349 | G    |
| 1   | A     | 363 | A    |
| 1   | A     | 383 | G    |

#### 5.4 Non-standard residues in protein, DNA, RNA chains [i](#)

There are no non-standard protein/DNA/RNA residues in this entry.

#### 5.5 Carbohydrates [i](#)

There are no oligosaccharides in this entry.

#### 5.6 Ligand geometry [i](#)

Of 25 ligands modelled in this entry, 25 are monoatomic - leaving 0 for Mogul analysis.

There are no bond length outliers.

There are no bond angle outliers.

There are no chirality outliers.

There are no torsion outliers.

There are no ring outliers.

No monomer is involved in short contacts.

#### 5.7 Other polymers [i](#)

There are no such residues in this entry.

## 5.8 Polymer linkage issues

There are no chain breaks in this entry.

For Manuscript Review

## 6 Map visualisation [i](#)

This section contains visualisations of the EMDB entry EMD-70998. These allow visual inspection of the internal detail of the map and identification of artifacts.

Images derived from a raw map, generated by summing the deposited half-maps, are presented below the corresponding image components of the primary map to allow further visual inspection and comparison with those of the primary map.

### 6.1 Orthogonal projections [i](#)

#### 6.1.1 Primary map

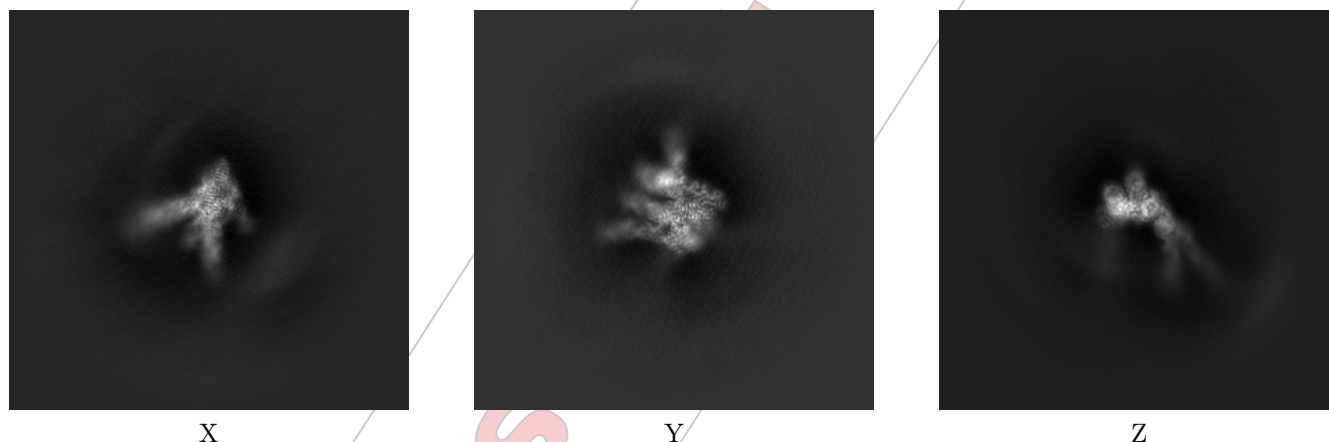

#### 6.1.2 Raw map

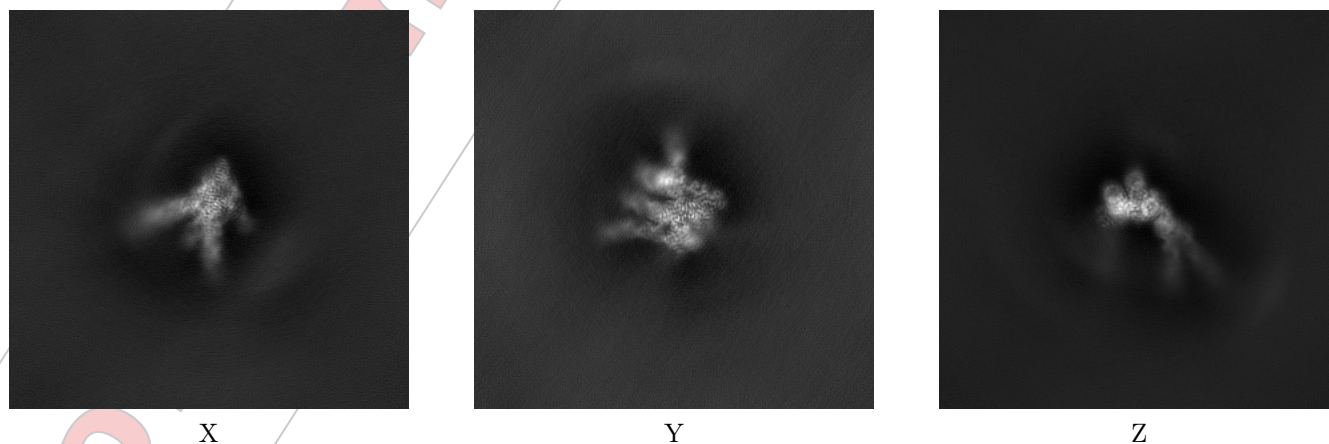

The images above show the map projected in three orthogonal directions.

## 6.2 Central slices [i](#)

### 6.2.1 Primary map

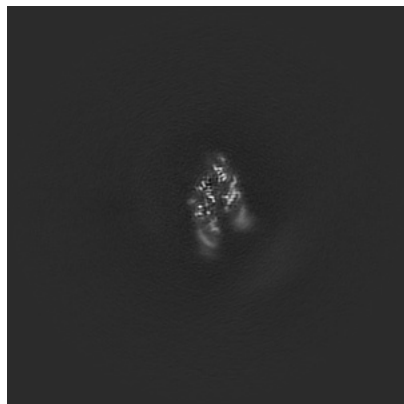

X Index: 200

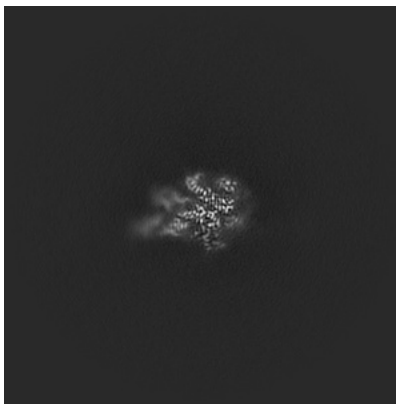

Y Index: 200

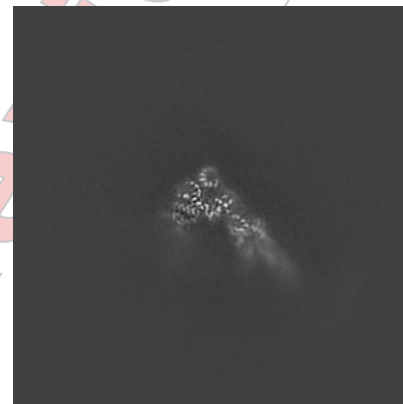

Z Index: 200

### 6.2.2 Raw map

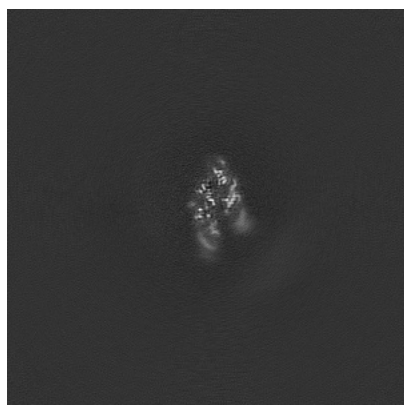

X Index: 200

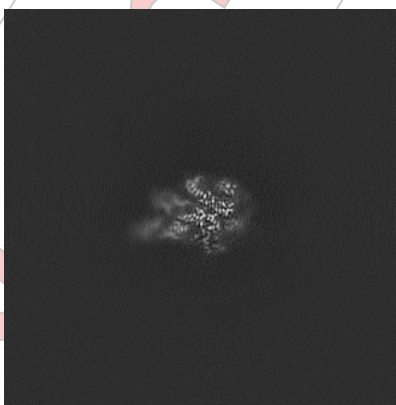

Y Index: 200

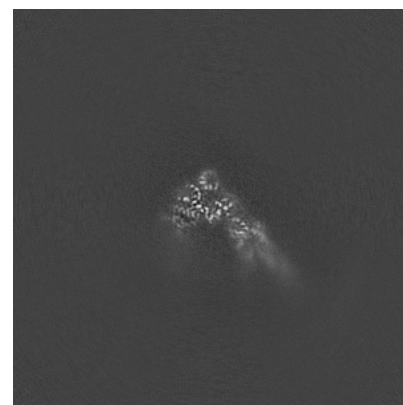

Z Index: 200

The images above show central slices of the map in three orthogonal directions.

## 6.3 Largest variance slices [i](#)

### 6.3.1 Primary map

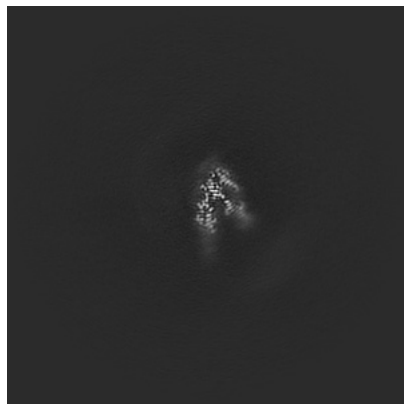

X Index: 193



Y Index: 200

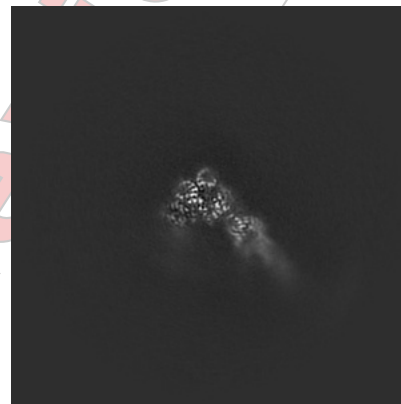

Z Index: 202

### 6.3.2 Raw map

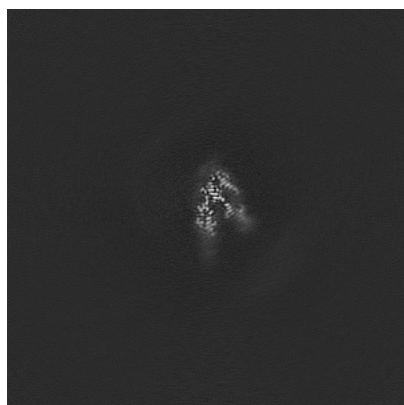

X Index: 193



Y Index: 200

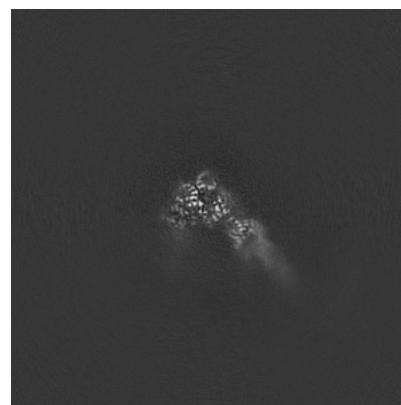

Z Index: 202

The images above show the largest variance slices of the map in three orthogonal directions.

## 6.4 Orthogonal standard-deviation projections (False-color) [i](#)

### 6.4.1 Primary map

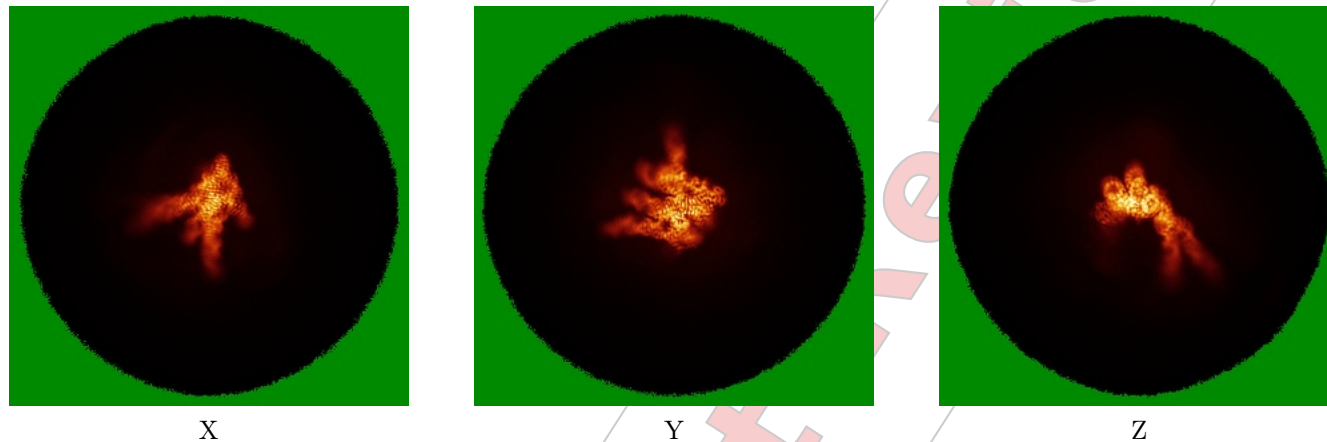

### 6.4.2 Raw map

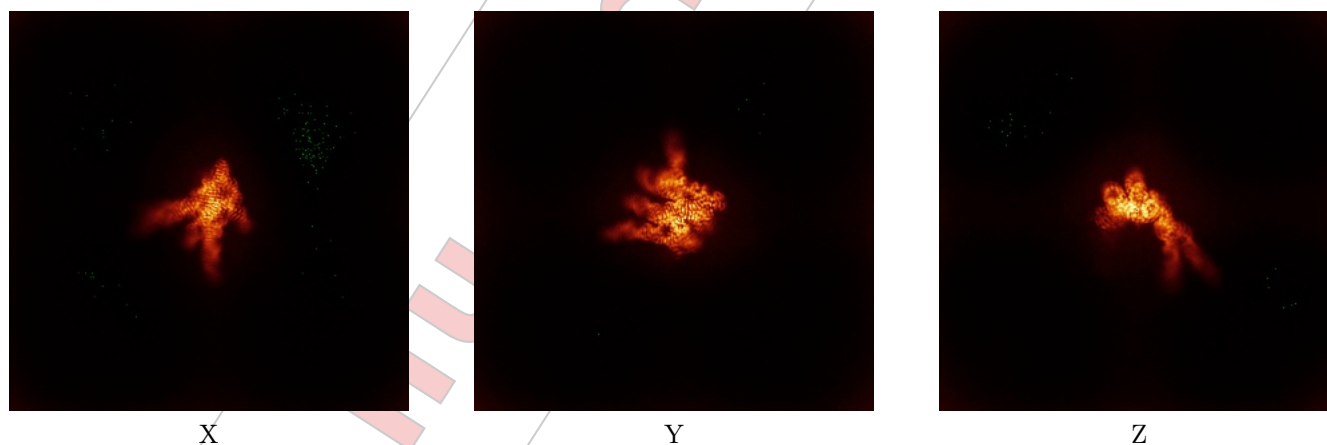

The images above show the map standard deviation projections with false color in three orthogonal directions. Minimum values are shown in green, max in blue, and dark to light orange shades represent small to large values respectively.

## 6.5 Orthogonal surface views [i](#)

### 6.5.1 Primary map

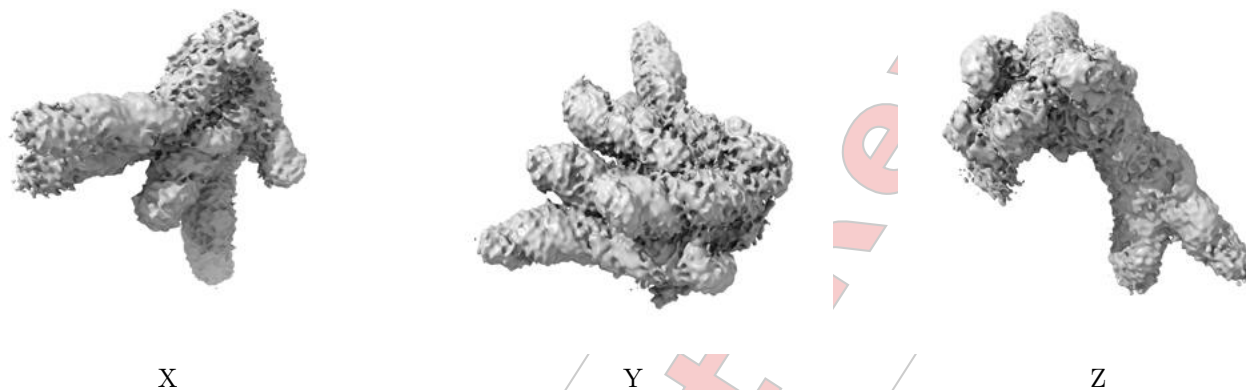

The images above show the 3D surface view of the map at the recommended contour level 0.033. These images, in conjunction with the slice images, may facilitate assessment of whether an appropriate contour level has been provided.

### 6.5.2 Raw map

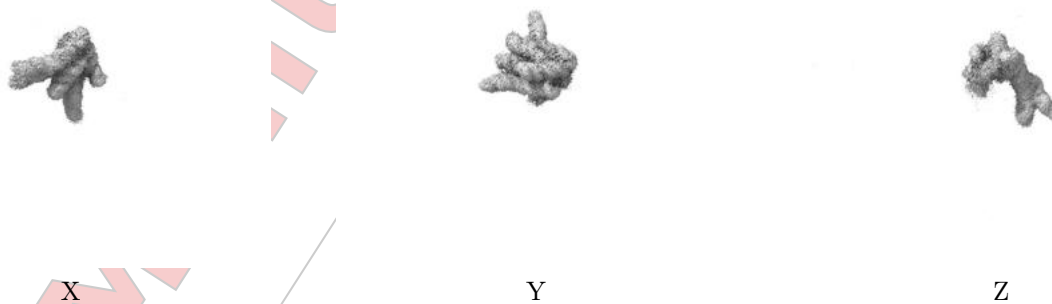

These images show the 3D surface of the raw map. The raw map's contour level was selected so that its surface encloses the same volume as the primary map does at its recommended contour level.

## 6.6 Mask visualisation [i](#)

This section was not generated. No masks/segmentation were deposited.

## 7 Map analysis [i](#)

This section contains the results of statistical analysis of the map.

### 7.1 Map-value distribution [i](#)

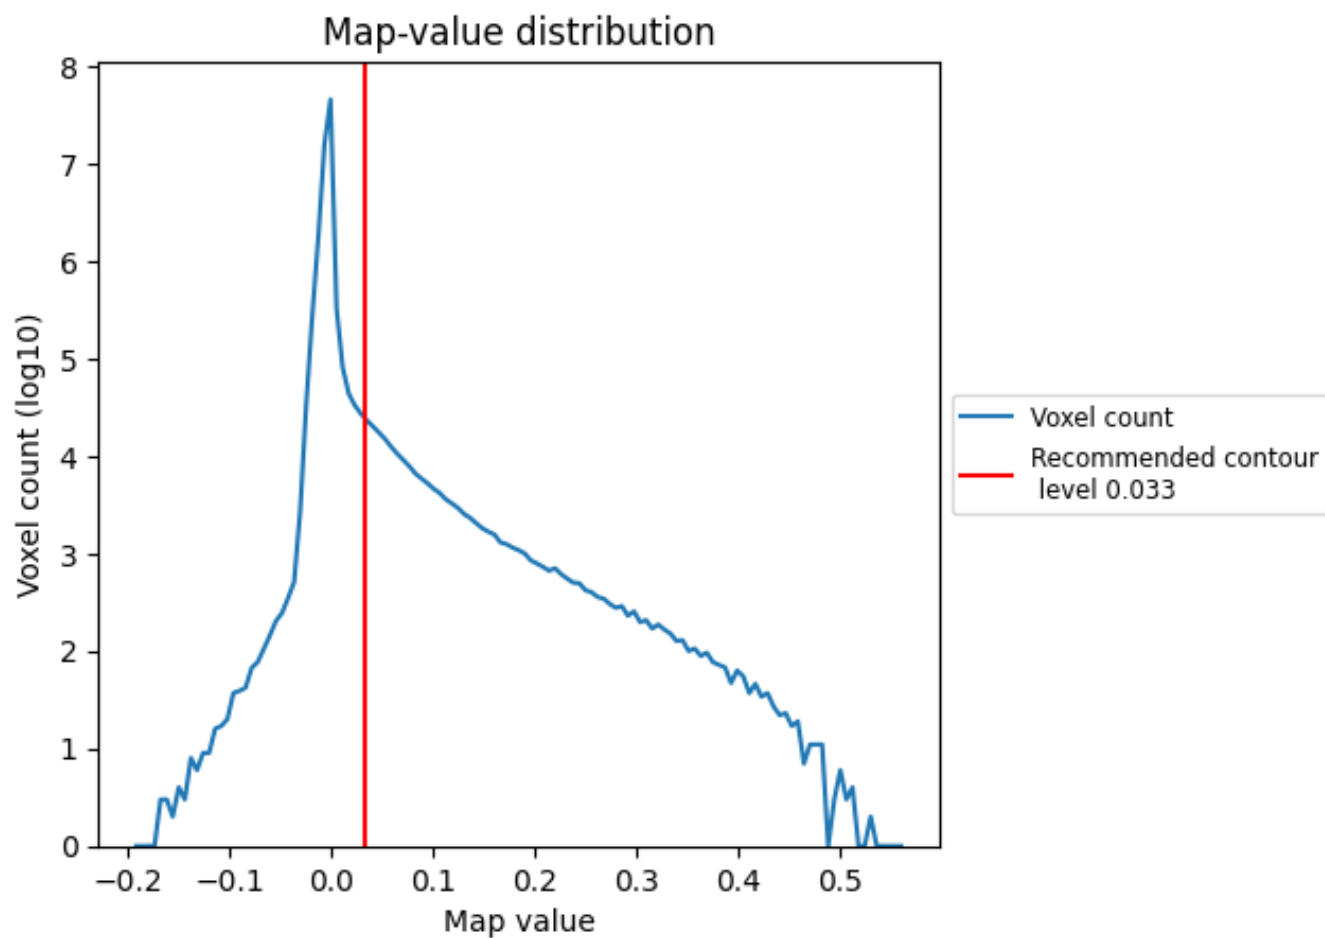

The map-value distribution is plotted in 128 intervals along the x-axis. The y-axis is logarithmic. A spike in this graph at zero usually indicates that the volume has been masked.

## 7.2 Volume estimate [i](#)

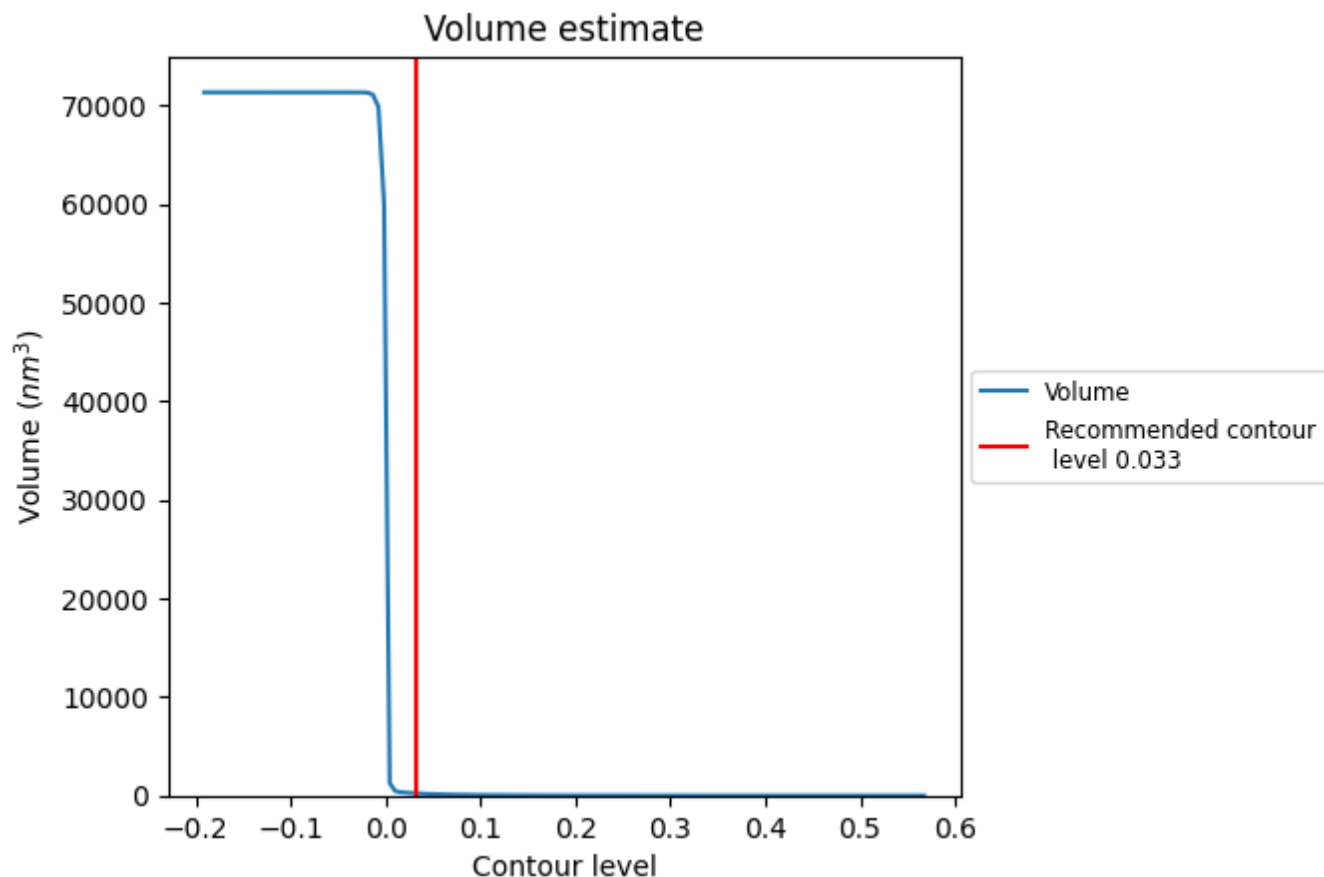

The volume at the recommended contour level is 215 nm<sup>3</sup>; this corresponds to an approximate mass of 194 kDa.

The volume estimate graph shows how the enclosed volume varies with the contour level. The recommended contour level is shown as a vertical line and the intersection between the line and the curve gives the volume of the enclosed surface at the given level.

7.3 Rotationally averaged power spectrum 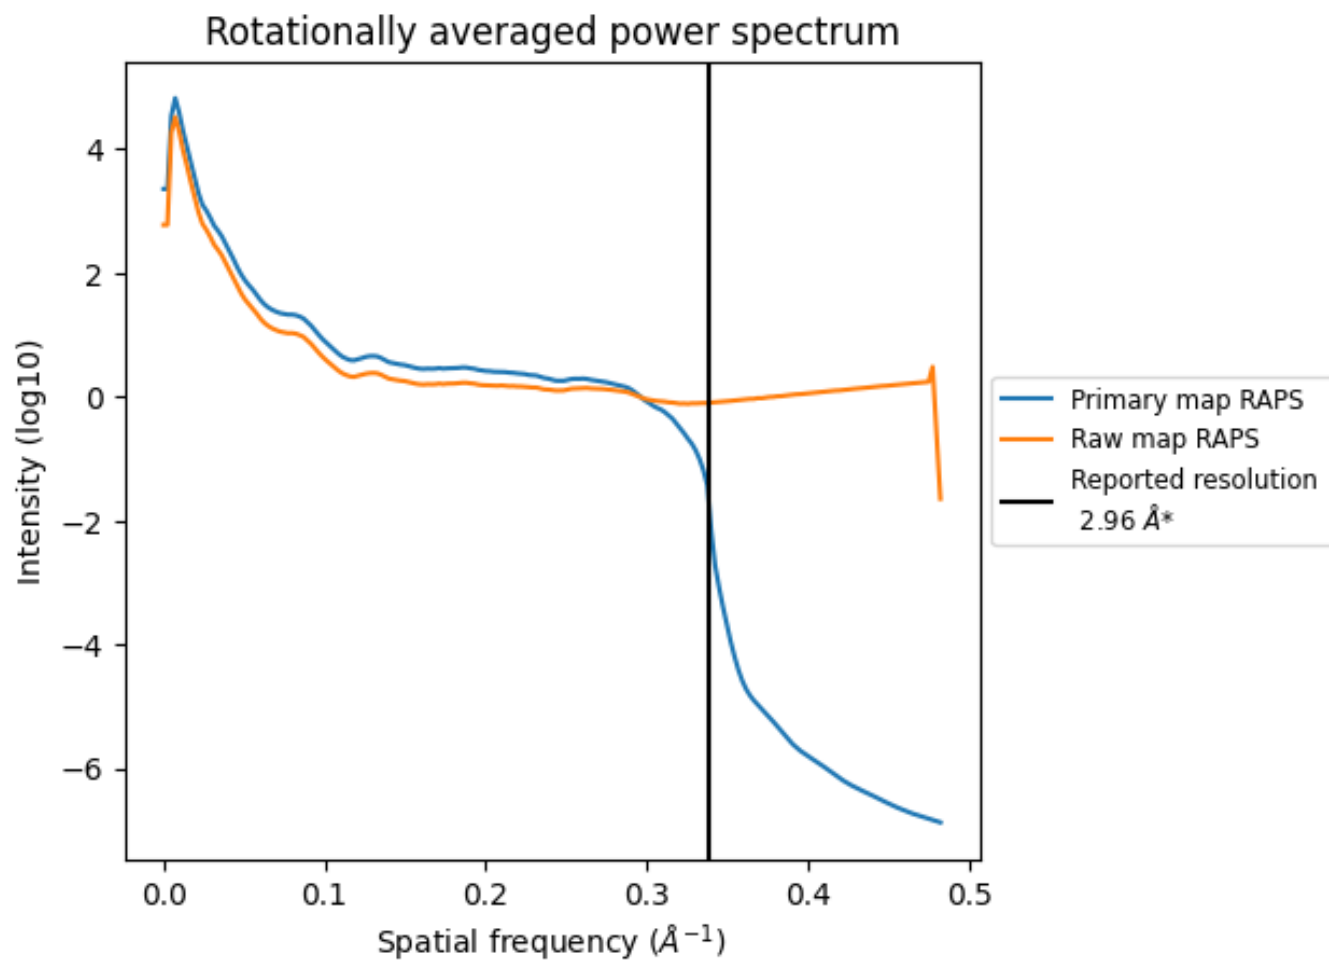

\*Reported resolution corresponds to spatial frequency of 0.338 Å<sup>-1</sup>

## 8 Fourier-Shell correlation [\(i\)](#)

Fourier-Shell Correlation (FSC) is the most commonly used method to estimate the resolution of single-particle and subtomogram-averaged maps. The shape of the curve depends on the imposed symmetry, mask and whether or not the two 3D reconstructions used were processed from a common reference. The reported resolution is shown as a black line. A curve is displayed for the half-bit criterion in addition to lines showing the 0.143 gold standard cut-off and 0.5 cut-off.

### 8.1 FSC [\(i\)](#)

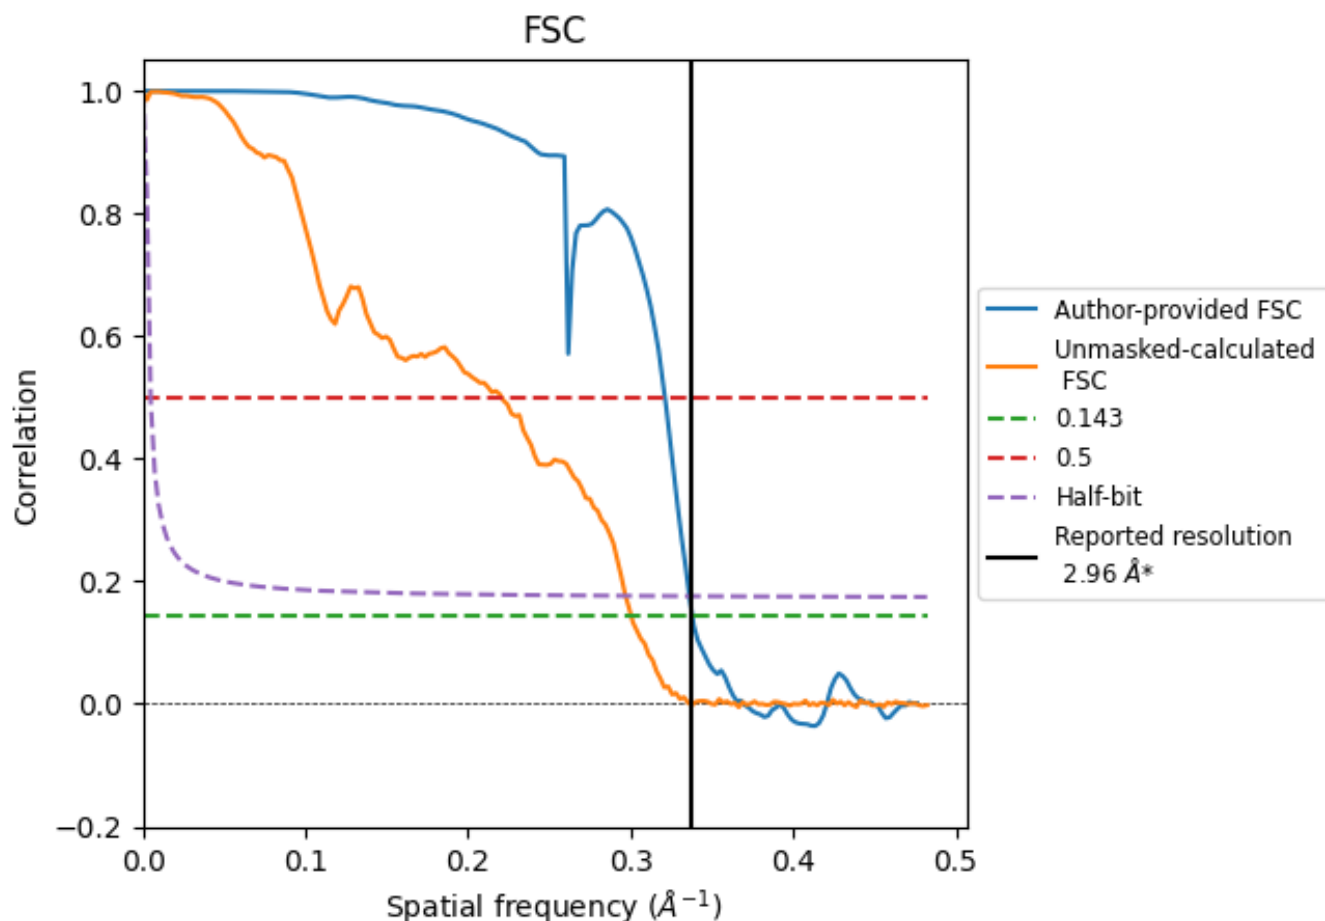

\*Reported resolution corresponds to spatial frequency of 0.338 Å<sup>-1</sup>

## 8.2 Resolution estimates [i](#)

| Resolution estimate (Å)   | Estimation criterion (FSC cut-off) |      |          |
|---------------------------|------------------------------------|------|----------|
|                           | 0.143                              | 0.5  | Half-bit |
| Reported by author        | 2.96                               | -    | -        |
| Author-provided FSC curve | 2.96                               | 3.11 | 2.98     |
| Unmasked-calculated*      | 3.33                               | 4.53 | 3.37     |

\*Resolution estimate based on FSC curve calculated by comparison of deposited half-maps. The value from deposited half-maps intersecting FSC 0.143 CUT-OFF 3.33 differs from the reported value 2.96 by more than 10 %

## 9 Map-model fit [i](#)

This section contains information regarding the fit between EMDB map EMD-70998 and PDB model 9OY6. Per-residue inclusion information can be found in section 3 on page 5.

### 9.1 Map-model overlay [i](#)

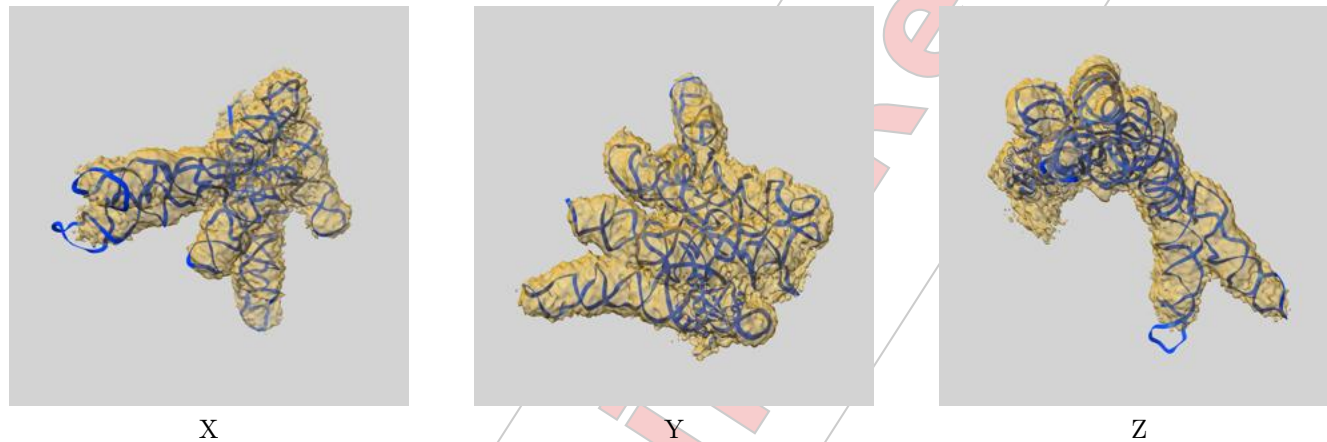

The images above show the 3D surface view of the map at the recommended contour level 0.033 at 50% transparency in yellow overlaid with a ribbon representation of the model coloured in blue. These images allow for the visual assessment of the quality of fit between the atomic model and the map.

## 9.2 Q-score mapped to coordinate model [\(i\)](#)

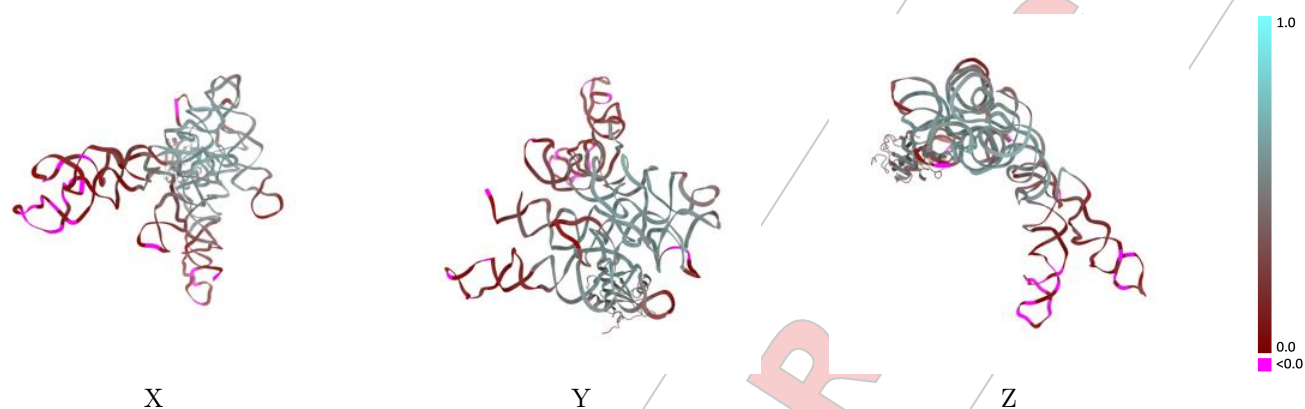

The images above show the model with each residue coloured according to its Q-score. This shows their resolvability in the map with higher Q-score values reflecting better resolvability. Please note: Q-score is calculating the resolvability of atoms, and thus high values are only expected at resolutions at which atoms can be resolved. Low Q-score values may therefore be expected for many entries.

## 9.3 Atom inclusion mapped to coordinate model [\(i\)](#)

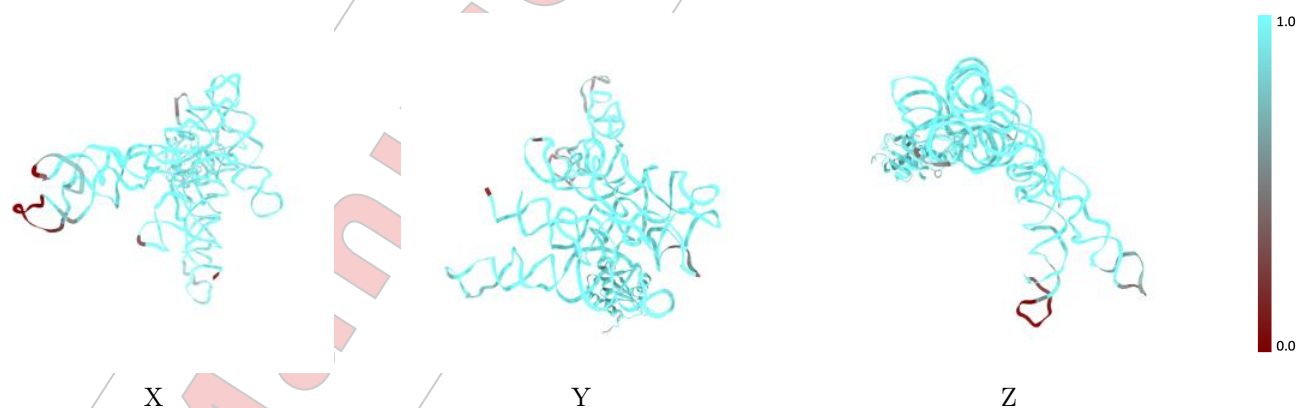

The images above show the model with each residue coloured according to its atom inclusion. This shows to what extent they are inside the map at the recommended contour level (0.033).

## 9.4 Atom inclusion [i](#)

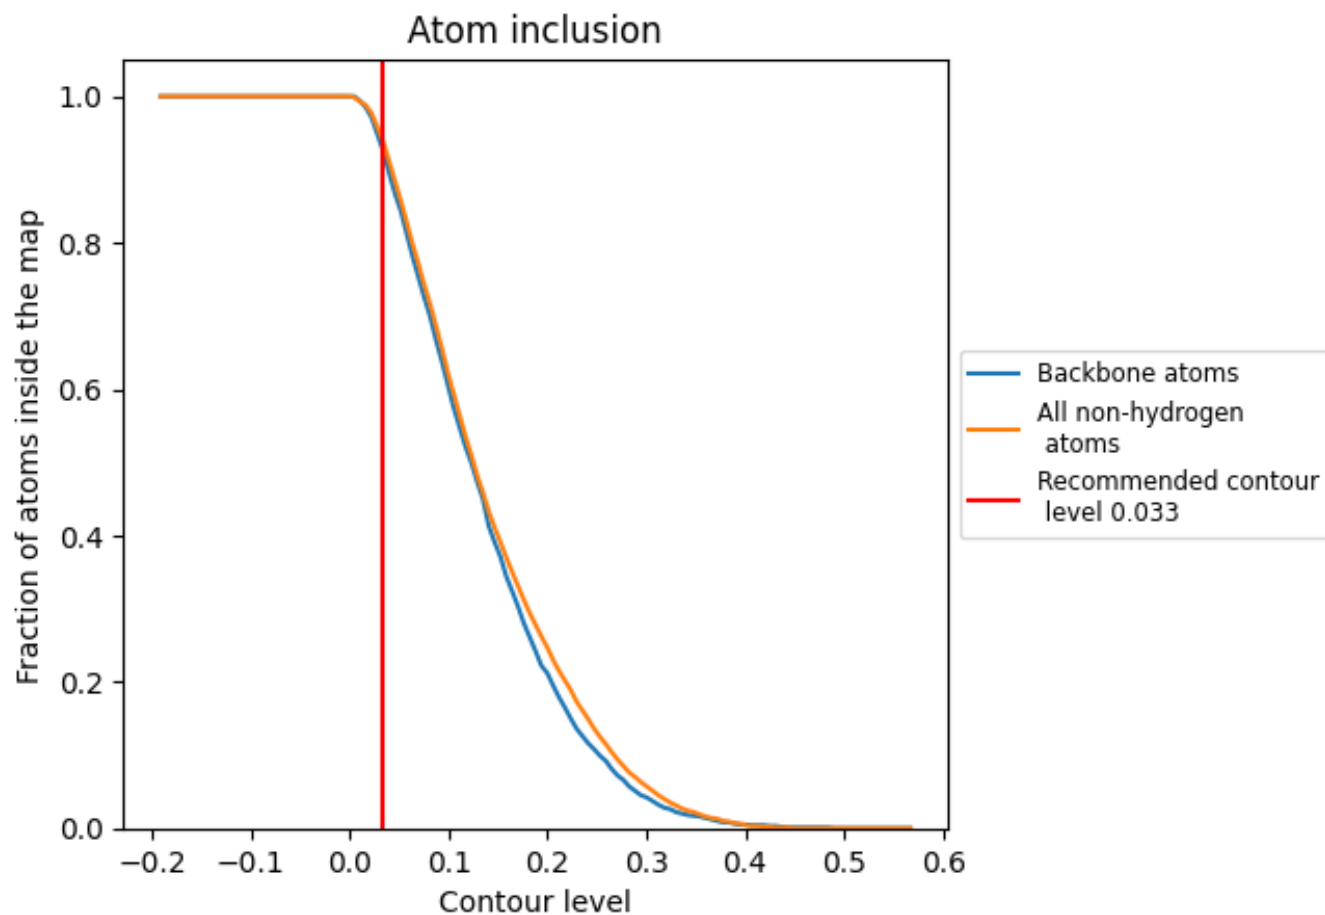

At the recommended contour level, 93% of all backbone atoms, 94% of all non-hydrogen atoms, are inside the map.

## 9.5 Map-model fit summary [i](#)

The table lists the average atom inclusion at the recommended contour level (0.033) and Q-score for the entire model and for each chain.

| Chain | Atom inclusion                                                                           | Q-score                                                                                  |
|-------|------------------------------------------------------------------------------------------|------------------------------------------------------------------------------------------|
| All   |  0.9410 |  0.3670 |
| A     |  0.9400 |  0.3580 |
| B     |  0.9460 |  0.4500 |





# Full wwPDB EM Validation Report ⓘ

Jun 8, 2025 – 04:05 PM EDT

PDB ID : 9OY7 / pdb\_00009oy7  
EMDB ID : EMD-71000  
Title : Structure of Geobacillus stearothermophilus RNase P holoenzyme tetraloop mutant in complex with precursor tRNA  
Deposited on : 2025-06-04  
Resolution : 2.94 Å (reported)  
Based on initial model : 2A64

**This wwPDB validation report is for manuscript review**

This is a Full wwPDB EM Validation Report.

This report is produced by the wwPDB biocuration pipeline after annotation of the structure.

We welcome your comments at [validation@mail.wwpdb.org](mailto:validation@mail.wwpdb.org)

A user guide is available at

<https://www.wwpdb.org/validation/2017/EMValidationReportHelp>

with specific help available everywhere you see the ⓘ symbol.

The types of validation reports are described at

<http://www.wwpdb.org/validation/2017/FAQs#types>.

---

The following versions of software and data (see [references ⓘ](#)) were used in the production of this report:

EMDB validation analysis : 0.0.1.dev118  
MolProbity : 4-5-2 with Phenix2.0rc1  
Percentile statistics : 20231227.v01 (using entries in the PDB archive December 27th 2023)  
MapQ : 1.9.13  
Ideal geometry (proteins) : Engh & Huber (2001)  
Ideal geometry (DNA, RNA) : Parkinson et al. (1996)  
Validation Pipeline (wwPDB-VP) : 2.43.1

# 1 Overall quality at a glance i

The following experimental techniques were used to determine the structure:  
*ELECTRON MICROSCOPY*

The reported resolution of this entry is 2.94 Å.

Percentile scores (ranging between 0-100) for global validation metrics of the entry are shown in the following graphic. The table shows the number of entries on which the scores are based.

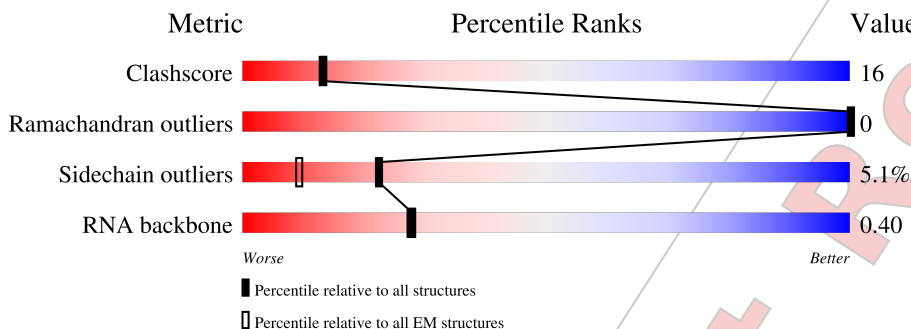

| Metric                | Whole archive (#Entries) | EM structures (#Entries) |
|-----------------------|--------------------------|--------------------------|
| Clashscore            | 210492                   | 15764                    |
| Ramachandran outliers | 207382                   | 16835                    |
| Sidechain outliers    | 206894                   | 16415                    |
| RNA backbone          | 6643                     | 2191                     |

The table below summarises the geometric issues observed across the polymeric chains and their fit to the map. The red, orange, yellow and green segments of the bar indicate the fraction of residues that contain outliers for  $\geq 3$ , 2, 1 and 0 types of geometric quality criteria respectively. A grey segment represents the fraction of residues that are not modelled. The numeric value for each fraction is indicated below the corresponding segment, with a dot representing fractions  $\leq 5\%$ . The upper red bar (where present) indicates the fraction of residues that have poor fit to the EM map (all-atom inclusion  $< 40\%$ ). The numeric value is given above the bar.

| Mol | Chain | Length | Quality of chain |
|-----|-------|--------|------------------|
| 1   | A     | 417    | <br>29% 52% 18%  |
| 2   | B     | 116    | <br>75% 24%      |
| 3   | C     | 92     | <br>38% 46% 12%  |
| 3   | E     | 92     | <br>90%          |

## 2 Entry composition [i](#)

There are 4 unique types of molecules in this entry. The entry contains 12001 atoms, of which 0 are hydrogens and 0 are deuteriums.

In the tables below, the AltConf column contains the number of residues with at least one atom in alternate conformation and the Trace column contains the number of residues modelled with at most 2 atoms.

- Molecule 1 is a RNA chain called RNase P RNA component tetraloop mutant.

| Mol | Chain | Residues | Atoms |      |      |      |     | AltConf | Trace |
|-----|-------|----------|-------|------|------|------|-----|---------|-------|
|     |       |          | Total | C    | N    | O    | P   |         |       |
| 1   | A     | 417      | 8953  | 3992 | 1649 | 2895 | 417 | 0       | 0     |

There are 5 discrepancies between the modelled and reference sequences:

| Chain | Residue | Modelled | Actual | Comment             | Reference |
|-------|---------|----------|--------|---------------------|-----------|
| A     | 215     | U        | G      | engineered mutation | GB 143442 |
| A     | 216     | U        | A      | engineered mutation | GB 143442 |
| A     | 217     | U        | A      | engineered mutation | GB 143442 |
| A     | 218     | U        | A      | engineered mutation | GB 143442 |
| A     | 417     | C        | G      | conflict            | GB 143442 |

- Molecule 2 is a protein called Ribonuclease P protein component.

| Mol | Chain | Residues | Atoms |     |     |     |   | AltConf | Trace |
|-----|-------|----------|-------|-----|-----|-----|---|---------|-------|
|     |       |          | Total | C   | N   | O   | S |         |       |
| 2   | B     | 116      | 947   | 608 | 174 | 162 | 3 | 0       | 0     |

There are 2 discrepancies between the modelled and reference sequences:

| Chain | Residue | Modelled | Actual | Comment        | Reference      |
|-------|---------|----------|--------|----------------|----------------|
| B     | 0       | GLY      | -      | expression tag | UNP A0A150N245 |
| B     | 64      | ILE      | VAL    | conflict       | UNP A0A150N245 |

- Molecule 3 is a RNA chain called precursor RNA (89-MER).

| Mol | Chain | Residues | Atoms |     |     |     |    | AltConf | Trace |
|-----|-------|----------|-------|-----|-----|-----|----|---------|-------|
|     |       |          | Total | C   | N   | O   | P  |         |       |
| 3   | C     | 89       | 1889  | 842 | 326 | 632 | 89 | 0       | 0     |
| 3   | E     | 9        | 188   | 84  | 29  | 66  | 9  | 0       | 0     |

There are 20 discrepancies between the modelled and reference sequences:

| Chain | Residue | Modelled | Actual | Comment  | Reference     |
|-------|---------|----------|--------|----------|---------------|
| C     | -12     | G        | C      | conflict | GB 1919315002 |
| C     | -9      | U        | A      | conflict | GB 1919315002 |
| C     | -8      | U        | A      | conflict | GB 1919315002 |
| C     | -6      | C        | G      | conflict | GB 1919315002 |
| C     | -5      | C        | A      | conflict | GB 1919315002 |
| C     | -4      | C        | U      | conflict | GB 1919315002 |
| C     | -1      | U        | G      | conflict | GB 1919315002 |
| C     | 0       | C        | G      | conflict | GB 1919315002 |
| C     | 76      | A        | U      | conflict | GB 1919315002 |
| C     | 78      | A        | U      | conflict | GB 1919315002 |
| E     | -12     | G        | C      | conflict | GB 1919315002 |
| E     | -9      | U        | A      | conflict | GB 1919315002 |
| E     | -8      | U        | A      | conflict | GB 1919315002 |
| E     | -6      | C        | G      | conflict | GB 1919315002 |
| E     | -5      | C        | A      | conflict | GB 1919315002 |
| E     | -4      | C        | U      | conflict | GB 1919315002 |
| E     | -1      | U        | G      | conflict | GB 1919315002 |
| E     | 0       | C        | G      | conflict | GB 1919315002 |
| E     | 76      | A        | U      | conflict | GB 1919315002 |
| E     | 78      | A        | U      | conflict | GB 1919315002 |

- Molecule 4 is CALCIUM ION (CCD ID: CA) (formula: Ca) (labeled as "Ligand of Interest" by depositor).

| Mol | Chain | Residues | Atoms             | AltConf |
|-----|-------|----------|-------------------|---------|
| 4   | A     | 23       | Total Ca<br>23 23 | 0       |
| 4   | C     | 1        | Total Ca<br>1 1   | 0       |

### 3 Residue-property plots

These plots are drawn for all protein, RNA, DNA and oligosaccharide chains in the entry. The first graphic for a chain summarises the proportions of the various outlier classes displayed in the second graphic. The second graphic shows the sequence view annotated by issues in geometry and atom inclusion in map density. Residues are color-coded according to the number of geometric quality criteria for which they contain at least one outlier: green = 0, yellow = 1, orange = 2 and red = 3 or more. A red diamond above a residue indicates a poor fit to the EM map for this residue (all-atom inclusion < 40%). Stretches of 2 or more consecutive residues without any outlier are shown as a green connector. Residues present in the sample, but not in the model, are shown in grey.

- Molecule 1: RNase P RNA component tetraloop mutant

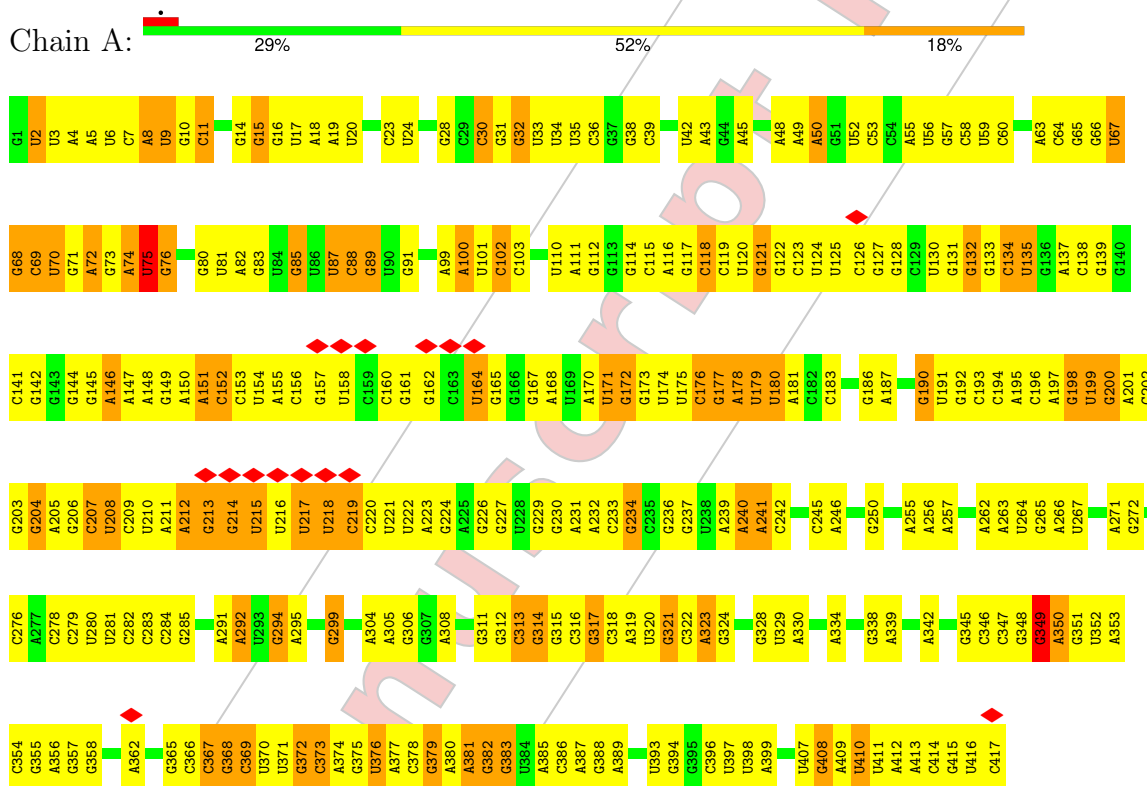

- Molecule 2: Ribonuclease P protein component

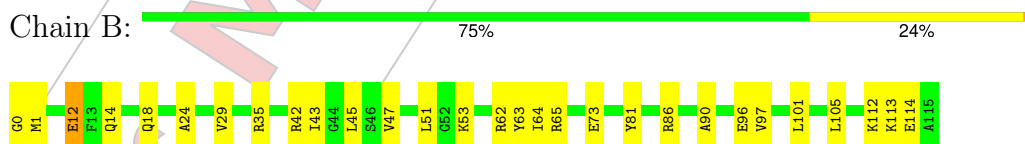

- Molecule 3: precursor RNA (89-MER)

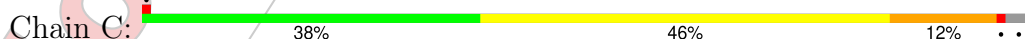

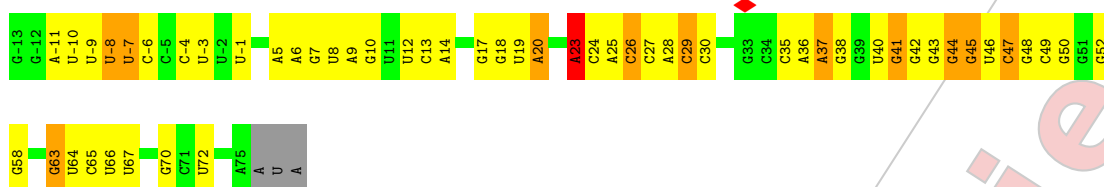

- Molecule 3: precursor RNA (89-MER)

Chain E: . . . 90%

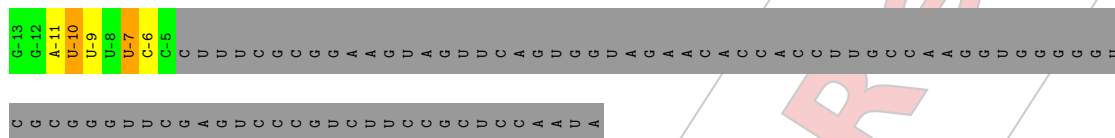

For Manuscript Review

## 4 Experimental information i

| Property                             | Value                                   | Source    |
|--------------------------------------|-----------------------------------------|-----------|
| EM reconstruction method             | SINGLE PARTICLE                         | Depositor |
| Imposed symmetry                     | POINT, Not provided                     |           |
| Number of particles used             | 309996                                  | Depositor |
| Resolution determination method      | FSC 0.143 CUT-OFF                       | Depositor |
| CTF correction method                | PHASE FLIPPING AND AMPLITUDE CORRECTION | Depositor |
| Microscope                           | FEI TALOS ARCTICA                       | Depositor |
| Voltage (kV)                         | 200                                     | Depositor |
| Electron dose ( $e^-/\text{\AA}^2$ ) | 57                                      | Depositor |
| Minimum defocus (nm)                 | 500                                     | Depositor |
| Maximum defocus (nm)                 | 1500                                    | Depositor |
| Magnification                        | Not provided                            |           |
| Image detector                       | GATAN K3 BIOQUANTUM (6k x 4k)           | Depositor |
| Maximum map value                    | 0.503                                   | Depositor |
| Minimum map value                    | -0.143                                  | Depositor |
| Average map value                    | -0.000                                  | Depositor |
| Map value standard deviation         | 0.007                                   | Depositor |
| Recommended contour level            | 0.035                                   | Depositor |
| Map size (Å)                         | 414.72, 414.72, 414.72                  | wwPDB     |
| Map dimensions                       | 400, 400, 400                           | wwPDB     |
| Map angles (°)                       | 90.0, 90.0, 90.0                        | wwPDB     |
| Pixel spacing (Å)                    | 1.0368, 1.0368, 1.0368                  | Depositor |

## 5 Model quality [i](#)

### 5.1 Standard geometry [i](#)

Bond lengths and bond angles in the following residue types are not validated in this section: CA

The Z score for a bond length (or angle) is the number of standard deviations the observed value is removed from the expected value. A bond length (or angle) with  $|Z| > 5$  is considered an outlier worth inspection. RMSZ is the root-mean-square of all Z scores of the bond lengths (or angles).

| Mol | Chain | Bond lengths |                | Bond angles |                |
|-----|-------|--------------|----------------|-------------|----------------|
|     |       | RMSZ         | # Z  >5        | RMSZ        | # Z  >5        |
| 1   | A     | 0.30         | 4/10025 (0.0%) | 0.53        | 2/15639 (0.0%) |
| 2   | B     | 0.18         | 0/962          | 0.42        | 0/1281         |
| 3   | C     | 0.36         | 0/2107         | 0.63        | 1/3281 (0.0%)  |
| 3   | E     | 0.08         | 0/208          | 0.19        | 0/321          |
| All | All   | 0.30         | 4/13302 (0.0%) | 0.53        | 3/20522 (0.0%) |

All (4) bond length outliers are listed below:

| Mol | Chain | Res | Type | Atoms  | Z    | Observed(Å) | Ideal(Å) |
|-----|-------|-----|------|--------|------|-------------|----------|
| 1   | A     | 216 | U    | C1'-N1 | 6.38 | 1.58        | 1.48     |
| 1   | A     | 218 | U    | C1'-N1 | 6.36 | 1.57        | 1.48     |
| 1   | A     | 217 | U    | C1'-N1 | 6.34 | 1.57        | 1.48     |
| 1   | A     | 215 | U    | C1'-N1 | 5.53 | 1.56        | 1.48     |

All (3) bond angle outliers are listed below:

| Mol | Chain | Res | Type | Atoms       | Z     | Observed(°) | Ideal(°) |
|-----|-------|-----|------|-------------|-------|-------------|----------|
| 1   | A     | 75  | U    | C2'-C3'-O3' | 6.64  | 119.46      | 109.50   |
| 1   | A     | 349 | G    | O3'-P-O5'   | -6.48 | 94.28       | 104.00   |
| 3   | C     | 23  | A    | C4'-C3'-C2' | -5.13 | 97.47       | 102.60   |

There are no chirality outliers.

There are no planarity outliers.

### 5.2 Too-close contacts [i](#)

In the following table, the Non-H and H(model) columns list the number of non-hydrogen atoms and hydrogen atoms in the chain respectively. The H(added) column lists the number of hydrogen atoms added and optimized by MolProbity. The Clashes column lists the number of clashes within

the asymmetric unit, whereas Symm-Clashes lists symmetry-related clashes.

| Mol | Chain | Non-H | H(model) | H(added) | Clashes | Symm-Clashes |
|-----|-------|-------|----------|----------|---------|--------------|
| 1   | A     | 8953  | 0        | 4507     | 231     | 0            |
| 2   | B     | 947   | 0        | 1008     | 17      | 0            |
| 3   | C     | 1889  | 0        | 957      | 44      | 0            |
| 3   | E     | 188   | 0        | 96       | 2       | 0            |
| 4   | A     | 23    | 0        | 0        | 0       | 0            |
| 4   | C     | 1     | 0        | 0        | 0       | 0            |
| All | All   | 12001 | 0        | 6568     | 291     | 0            |

The all-atom clashscore is defined as the number of clashes found per 1000 atoms (including hydrogen atoms). The all-atom clashscore for this structure is 16.

All (291) close contacts within the same asymmetric unit are listed below, sorted by their clash magnitude.

| Atom-1         | Atom-2          | Interatomic distance (Å) | Clash overlap (Å) |
|----------------|-----------------|--------------------------|-------------------|
| 3:C:43:G:H3'   | 3:C:44:G:H3'    | 1.56                     | 0.84              |
| 1:A:349:G:H22  | 1:A:379:G:H1'   | 1.45                     | 0.82              |
| 1:A:371:U:H5'' | 1:A:372:G:H5'   | 1.60                     | 0.81              |
| 1:A:349:G:H21  | 1:A:350:A:H62   | 1.30                     | 0.79              |
| 1:A:313:C:H2'  | 1:A:314:G:C8    | 2.19                     | 0.77              |
| 3:C:-11:A:H2'  | 3:C:-10:U:C6    | 2.21                     | 0.74              |
| 1:A:316:C:H2'  | 1:A:317:G:C8    | 2.22                     | 0.73              |
| 2:B:0:GLY:HA3  | 2:B:65:ARG:HB3  | 1.72                     | 0.72              |
| 1:A:158:U:H3   | 1:A:168:A:H61   | 1.38                     | 0.72              |
| 1:A:199:U:H2'  | 1:A:200:G:C8    | 2.28                     | 0.69              |
| 1:A:180:U:H2'  | 1:A:181:A:H8    | 1.59                     | 0.68              |
| 3:C:41:G:H2'   | 3:C:42:G:C8     | 2.27                     | 0.68              |
| 1:A:115:C:H2'  | 1:A:116:A:H8    | 1.59                     | 0.67              |
| 2:B:12:GLU:HG2 | 2:B:42:ARG:HH22 | 1.60                     | 0.67              |
| 1:A:215:U:H2'  | 1:A:217:U:H5    | 1.59                     | 0.66              |
| 1:A:313:C:H2'  | 1:A:314:G:H8    | 1.60                     | 0.65              |
| 1:A:195:A:H2'  | 1:A:196:C:C6    | 2.32                     | 0.64              |
| 1:A:197:A:H61  | 1:A:233:C:H42   | 1.45                     | 0.64              |
| 1:A:308:A:N1   | 1:A:329:U:H5    | 1.95                     | 0.64              |
| 1:A:130:U:H2'  | 1:A:131:G:H8    | 1.62                     | 0.64              |
| 3:C:43:G:H3'   | 3:C:44:G:C3'    | 2.27                     | 0.63              |
| 1:A:212:A:H2'  | 1:A:213:G:C8    | 2.33                     | 0.62              |
| 3:C:9:A:N3     | 3:C:44:G:H1'    | 2.14                     | 0.62              |
| 1:A:146:A:H3'  | 1:A:178:A:H61   | 1.65                     | 0.62              |
| 1:A:72:A:H2'   | 1:A:73:G:C8     | 2.35                     | 0.61              |
| 1:A:374:A:H2'  | 1:A:375:G:C8    | 2.36                     | 0.60              |

Continued on next page...

Continued from previous page...

| Atom-1          | Atom-2          | Interatomic distance (Å) | Clash overlap (Å) |
|-----------------|-----------------|--------------------------|-------------------|
| 1:A:316:C:H2'   | 1:A:317:G:N7    | 2.16                     | 0.60              |
| 1:A:115:C:H2'   | 1:A:116:A:C8    | 2.35                     | 0.60              |
| 1:A:314:G:H1    | 1:A:323:A:H61   | 1.48                     | 0.60              |
| 2:B:47:VAL:HG13 | 2:B:51:LEU:HD12 | 1.83                     | 0.60              |
| 1:A:9:U:H2'     | 1:A:10:G:H8     | 1.66                     | 0.60              |
| 1:A:338:G:H2'   | 1:A:339:A:H8    | 1.67                     | 0.59              |
| 1:A:315:G:H2'   | 1:A:316:C:C6    | 2.38                     | 0.59              |
| 1:A:411:U:H2'   | 1:A:412:A:C8    | 2.38                     | 0.59              |
| 1:A:71:G:N2     | 1:A:73:G:H3'    | 2.17                     | 0.59              |
| 1:A:211:A:H2'   | 1:A:212:A:C8    | 2.38                     | 0.59              |
| 3:C:9:A:C2      | 3:C:44:G:H1'    | 2.38                     | 0.58              |
| 1:A:411:U:H2'   | 1:A:412:A:H8    | 1.67                     | 0.58              |
| 1:A:233:C:H2'   | 1:A:234:G:C8    | 2.38                     | 0.58              |
| 3:C:-11:A:H2'   | 3:C:-10:U:H6    | 1.68                     | 0.58              |
| 3:C:27:C:H2'    | 3:C:28:A:H8     | 1.68                     | 0.58              |
| 1:A:172:G:H2'   | 1:A:173:G:H8    | 1.69                     | 0.58              |
| 1:A:110:U:H2'   | 1:A:111:A:H8    | 1.68                     | 0.58              |
| 3:C:43:G:C3'    | 3:C:44:G:H3'    | 2.31                     | 0.58              |
| 1:A:352:U:H2'   | 1:A:353:A:H8    | 1.69                     | 0.57              |
| 3:C:27:C:H2'    | 3:C:28:A:C8     | 2.39                     | 0.57              |
| 1:A:204:G:H2'   | 1:A:205:A:H8    | 1.69                     | 0.57              |
| 1:A:210:U:H2'   | 1:A:211:A:C8    | 2.39                     | 0.57              |
| 1:A:204:G:H2'   | 1:A:205:A:C8    | 2.40                     | 0.57              |
| 1:A:69:C:H2'    | 1:A:70:U:C6     | 2.39                     | 0.56              |
| 1:A:130:U:H2'   | 1:A:131:G:C8    | 2.39                     | 0.56              |
| 1:A:50:A:H5'    | 1:A:388:G:H5''  | 1.87                     | 0.56              |
| 1:A:240:A:H4'   | 1:A:241:A:OP2   | 2.06                     | 0.56              |
| 1:A:3:U:H2'     | 1:A:4:A:H8      | 1.71                     | 0.55              |
| 1:A:352:U:H2'   | 1:A:353:A:C8    | 2.40                     | 0.55              |
| 1:A:378:C:H3'   | 1:A:379:G:H8    | 1.72                     | 0.55              |
| 1:A:215:U:O2'   | 1:A:217:U:O4    | 2.17                     | 0.55              |
| 1:A:120:U:H3    | 1:A:131:G:H1    | 1.53                     | 0.55              |
| 1:A:256:A:H1'   | 3:C:72:U:H5'    | 1.88                     | 0.55              |
| 3:C:-8:U:HO2'   | 3:C:-7:U:H6     | 1.55                     | 0.55              |
| 1:A:42:U:H2'    | 1:A:43:A:C8     | 2.41                     | 0.55              |
| 1:A:215:U:H2'   | 1:A:217:U:C5    | 2.41                     | 0.55              |
| 1:A:245:C:H2'   | 1:A:246:A:H8    | 1.71                     | 0.55              |
| 1:A:17:U:H2'    | 1:A:18:A:H8     | 1.72                     | 0.54              |
| 2:B:51:LEU:HD22 | 2:B:90:ALA:HB2  | 1.89                     | 0.54              |
| 1:A:18:A:H2'    | 1:A:19:A:H8     | 1.72                     | 0.54              |
| 1:A:211:A:H2'   | 1:A:212:A:H8    | 1.71                     | 0.54              |

Continued on next page...

Continued from previous page...

| Atom-1         | Atom-2          | Interatomic distance (Å) | Clash overlap (Å) |
|----------------|-----------------|--------------------------|-------------------|
| 1:A:373:C:H2'  | 1:A:374:A:H8    | 1.70                     | 0.54              |
| 1:A:5:A:H2'    | 1:A:6:U:C6      | 2.42                     | 0.54              |
| 1:A:367:C:H2'  | 1:A:368:G:C8    | 2.42                     | 0.54              |
| 1:A:124:U:H2'  | 1:A:125:U:O4'   | 2.08                     | 0.54              |
| 1:A:102:C:H2'  | 1:A:103:C:O4'   | 2.07                     | 0.54              |
| 1:A:232:A:H2'  | 1:A:233:C:C6    | 2.43                     | 0.54              |
| 1:A:280:U:H2'  | 1:A:281:U:H6    | 1.73                     | 0.54              |
| 1:A:194:C:H2'  | 1:A:195:A:C8    | 2.43                     | 0.53              |
| 1:A:208:U:H2'  | 1:A:209:C:C6    | 2.43                     | 0.53              |
| 3:C:26:C:H2'   | 3:C:27:C:C6     | 2.43                     | 0.53              |
| 1:A:196:C:H2'  | 1:A:197:A:C8    | 2.43                     | 0.53              |
| 1:A:347:C:C2   | 1:A:383:G:N2    | 2.77                     | 0.53              |
| 1:A:200:G:O6   | 1:A:231:A:N1    | 2.42                     | 0.53              |
| 1:A:32:G:H1    | 1:A:34:U:H1'    | 1.73                     | 0.52              |
| 1:A:241:A:H2'  | 1:A:242:C:C6    | 2.44                     | 0.52              |
| 1:A:73:G:N2    | 1:A:291:A:H2'   | 2.25                     | 0.52              |
| 1:A:215:U:O2   | 1:A:218:U:O4    | 2.27                     | 0.52              |
| 1:A:378:C:H3'  | 1:A:379:G:C8    | 2.45                     | 0.52              |
| 1:A:172:G:H2'  | 1:A:173:G:C8    | 2.44                     | 0.52              |
| 1:A:15:G:N2    | 1:A:345:G:H1'   | 2.25                     | 0.52              |
| 1:A:218:U:O5'  | 1:A:218:U:H6    | 1.93                     | 0.52              |
| 1:A:3:U:H2'    | 1:A:4:A:C8      | 2.44                     | 0.52              |
| 1:A:14:G:H2'   | 1:A:385:A:C6    | 2.44                     | 0.52              |
| 1:A:18:A:H2'   | 1:A:19:A:C8     | 2.45                     | 0.52              |
| 1:A:285:G:H22  | 1:A:299:G:H1'   | 1.75                     | 0.52              |
| 3:C:24:C:H2'   | 3:C:25:A:H8     | 1.74                     | 0.52              |
| 1:A:233:C:H2'  | 1:A:234:G:H8    | 1.74                     | 0.52              |
| 3:C:42:G:H2'   | 3:C:43:G:C8     | 2.44                     | 0.52              |
| 1:A:9:U:H2'    | 1:A:10:G:C8     | 2.44                     | 0.51              |
| 1:A:219:C:H2'  | 1:A:220:C:C6    | 2.45                     | 0.51              |
| 1:A:280:U:H2'  | 1:A:281:U:C6    | 2.45                     | 0.51              |
| 1:A:175:U:H2'  | 1:A:176:C:C6    | 2.46                     | 0.51              |
| 1:A:180:U:H2'  | 1:A:181:A:C8    | 2.43                     | 0.51              |
| 1:A:374:A:H2'  | 1:A:375:G:H8    | 1.75                     | 0.51              |
| 3:C:24:C:H2'   | 3:C:25:A:C8     | 2.46                     | 0.51              |
| 1:A:208:U:H2'  | 1:A:209:C:H6    | 1.76                     | 0.51              |
| 1:A:373:C:H2'  | 1:A:374:A:C8    | 2.46                     | 0.51              |
| 1:A:338:G:H2'  | 1:A:339:A:C8    | 2.45                     | 0.51              |
| 1:A:17:U:H2'   | 1:A:18:A:C8     | 2.46                     | 0.51              |
| 1:A:230:G:H2'  | 1:A:231:A:C8    | 2.46                     | 0.51              |
| 2:B:24:ALA:HB2 | 2:B:29:VAL:HG13 | 1.94                     | 0.50              |

Continued on next page...

Continued from previous page...

| Atom-1         | Atom-2          | Interatomic distance (Å) | Clash overlap (Å) |
|----------------|-----------------|--------------------------|-------------------|
| 1:A:197:A:O3'  | 1:A:198:G:H3'   | 2.12                     | 0.50              |
| 1:A:408:G:H2'  | 1:A:409:A:H8    | 1.76                     | 0.50              |
| 1:A:45:A:H62   | 2:B:62:ARG:NH2  | 2.10                     | 0.49              |
| 1:A:206:G:H3'  | 1:A:207:C:H5''  | 1.93                     | 0.49              |
| 1:A:30:C:H2'   | 1:A:31:G:C8     | 2.47                     | 0.49              |
| 1:A:279:C:H2'  | 1:A:280:U:H6    | 1.77                     | 0.49              |
| 1:A:153:C:H2'  | 1:A:154:U:C6    | 2.47                     | 0.49              |
| 3:C:5:A:H2'    | 3:C:6:A:C8      | 2.47                     | 0.49              |
| 1:A:147:A:H2'  | 1:A:148:A:H8    | 1.78                     | 0.49              |
| 1:A:200:G:H2'  | 1:A:201:A:C8    | 2.47                     | 0.49              |
| 1:A:67:U:H4'   | 1:A:68:G:OP1    | 2.10                     | 0.49              |
| 1:A:223:A:H2'  | 1:A:224:G:C8    | 2.47                     | 0.49              |
| 1:A:85:G:O2'   | 1:A:87:U:O4     | 2.23                     | 0.49              |
| 1:A:190:G:H2'  | 1:A:191:U:O4'   | 2.13                     | 0.49              |
| 3:C:-9:U:H2'   | 3:C:-8:U:C6     | 2.48                     | 0.49              |
| 3:C:23:A:H2'   | 3:C:24:C:O4'    | 2.13                     | 0.49              |
| 1:A:118:C:H2'  | 1:A:119:C:C6    | 2.48                     | 0.49              |
| 2:B:14:GLN:O   | 2:B:18:GLN:HG2  | 2.13                     | 0.49              |
| 1:A:147:A:H2'  | 1:A:148:A:C8    | 2.47                     | 0.49              |
| 1:A:167:G:H2'  | 1:A:168:A:C8    | 2.47                     | 0.49              |
| 1:A:30:C:H2'   | 1:A:31:G:H8     | 1.78                     | 0.48              |
| 3:C:5:A:H2'    | 3:C:6:A:H8      | 1.79                     | 0.48              |
| 3:C:37:A:H2'   | 3:C:38:G:C8     | 2.48                     | 0.48              |
| 1:A:319:A:H1'  | 1:A:320:U:C5    | 2.49                     | 0.48              |
| 1:A:5:A:H2'    | 1:A:6:U:H6      | 1.78                     | 0.48              |
| 1:A:74:A:O2'   | 1:A:76:G:N7     | 2.44                     | 0.48              |
| 1:A:179:U:C4   | 1:A:233:C:H5'   | 2.49                     | 0.48              |
| 3:C:20:A:N7    | 3:C:45:G:C5     | 2.82                     | 0.48              |
| 1:A:85:G:H4'   | 1:A:85:G:OP1    | 2.14                     | 0.47              |
| 2:B:63:TYR:HB3 | 2:B:97:VAL:HG11 | 1.97                     | 0.47              |
| 3:C:40:U:H2'   | 3:C:41:G:C8     | 2.49                     | 0.47              |
| 1:A:201:A:H2'  | 1:A:202:C:C6    | 2.49                     | 0.47              |
| 3:C:-10:U:H2'  | 3:C:-9:U:C6     | 2.48                     | 0.47              |
| 1:A:209:C:H2'  | 1:A:210:U:C6    | 2.48                     | 0.47              |
| 1:A:212:A:H2'  | 1:A:213:G:H8    | 1.79                     | 0.47              |
| 1:A:110:U:H2'  | 1:A:111:A:C8    | 2.47                     | 0.47              |
| 1:A:197:A:H2'  | 1:A:199:U:C6    | 2.49                     | 0.47              |
| 1:A:220:C:H2'  | 1:A:221:U:C6    | 2.49                     | 0.47              |
| 1:A:349:G:H8   | 1:A:349:G:OP2   | 1.98                     | 0.47              |
| 1:A:386:C:H2'  | 1:A:387:A:O4'   | 2.15                     | 0.47              |
| 1:A:10:G:H2'   | 1:A:11:C:C6     | 2.50                     | 0.47              |

Continued on next page...

Continued from previous page...

| Atom-1          | Atom-2           | Interatomic distance (Å) | Clash overlap (Å) |
|-----------------|------------------|--------------------------|-------------------|
| 1:A:23:C:H2'    | 1:A:24:U:C6      | 2.50                     | 0.47              |
| 1:A:245:C:H2'   | 1:A:246:A:C8     | 2.49                     | 0.47              |
| 1:A:281:U:H2'   | 1:A:282:C:H6     | 1.80                     | 0.47              |
| 1:A:196:C:H2'   | 1:A:197:A:H8     | 1.80                     | 0.47              |
| 1:A:279:C:H2'   | 1:A:280:U:C6     | 2.50                     | 0.47              |
| 1:A:2:U:H2'     | 1:A:3:U:C6       | 2.50                     | 0.47              |
| 1:A:10:G:H2'    | 1:A:11:C:H6      | 1.80                     | 0.47              |
| 1:A:157:G:H1    | 1:A:170:A:H1'    | 1.80                     | 0.47              |
| 1:A:114:G:H2'   | 1:A:115:C:C6     | 2.51                     | 0.46              |
| 1:A:59:U:H1'    | 1:A:257:A:N3     | 2.30                     | 0.46              |
| 1:A:294:G:H2'   | 1:A:295:A:C8     | 2.50                     | 0.46              |
| 1:A:2:U:H2'     | 1:A:3:U:H6       | 1.81                     | 0.46              |
| 1:A:19:A:H2'    | 1:A:20:U:C6      | 2.50                     | 0.46              |
| 1:A:398:U:H2'   | 1:A:399:A:H8     | 1.80                     | 0.46              |
| 2:B:43:ILE:HD12 | 2:B:45:LEU:HD21  | 1.98                     | 0.46              |
| 1:A:32:G:N1     | 1:A:34:U:H1'     | 2.30                     | 0.46              |
| 1:A:42:U:H2'    | 1:A:43:A:H8      | 1.79                     | 0.46              |
| 1:A:355:G:H21   | 1:A:373:C:H42    | 1.64                     | 0.46              |
| 1:A:407:U:H2'   | 1:A:408:G:C8     | 2.51                     | 0.46              |
| 1:A:111:A:H2'   | 1:A:112:G:H8     | 1.81                     | 0.46              |
| 1:A:133:G:H2'   | 1:A:134:C:C6     | 2.51                     | 0.46              |
| 1:A:263:A:H2'   | 1:A:264:U:C6     | 2.51                     | 0.46              |
| 1:A:134:C:H2'   | 1:A:135:U:O4'    | 2.15                     | 0.46              |
| 1:A:376:U:C2    | 1:A:377:A:C8     | 3.04                     | 0.46              |
| 3:C:20:A:C2     | 3:C:47:C:C2      | 3.04                     | 0.46              |
| 1:A:71:G:N1     | 1:A:74:A:OP2     | 2.49                     | 0.46              |
| 1:A:195:A:H2'   | 1:A:196:C:H6     | 1.80                     | 0.45              |
| 2:B:64:ILE:HG23 | 2:B:101:LEU:HD21 | 1.98                     | 0.45              |
| 1:A:121:G:C6    | 1:A:131:G:C6     | 3.05                     | 0.45              |
| 1:A:214:G:H2'   | 1:A:215:U:H6     | 1.82                     | 0.45              |
| 1:A:144:G:H2'   | 1:A:145:G:O4'    | 2.17                     | 0.45              |
| 1:A:264:U:H2'   | 1:A:265:G:O4'    | 2.16                     | 0.45              |
| 1:A:356:A:H3'   | 1:A:357:G:H8     | 1.81                     | 0.45              |
| 3:C:64:U:H2'    | 3:C:65:C:C6      | 2.51                     | 0.45              |
| 1:A:6:U:H2'     | 1:A:7:C:C6       | 2.52                     | 0.45              |
| 1:A:57:G:H2'    | 1:A:58:C:O4'     | 2.17                     | 0.44              |
| 1:A:70:U:H2'    | 1:A:71:G:O4'     | 2.16                     | 0.44              |
| 1:A:164:U:H2'   | 1:A:165:G:O4'    | 2.17                     | 0.44              |
| 1:A:315:G:C2    | 1:A:316:C:C4     | 3.06                     | 0.44              |
| 3:C:65:C:H2'    | 3:C:66:U:C6      | 2.53                     | 0.44              |
| 1:A:118:C:H2'   | 1:A:119:C:H6     | 1.83                     | 0.44              |

Continued on next page...

Continued from previous page...

| Atom-1           | Atom-2         | Interatomic distance (Å) | Clash overlap (Å) |
|------------------|----------------|--------------------------|-------------------|
| 1:A:283:C:H2'    | 1:A:284:C:H6   | 1.82                     | 0.44              |
| 3:C:24:C:C2'     | 3:C:25:A:H8    | 2.30                     | 0.44              |
| 3:C:49:C:H2'     | 3:C:50:G:C8    | 2.52                     | 0.44              |
| 1:A:210:U:H2'    | 1:A:211:A:H8   | 1.82                     | 0.44              |
| 1:A:214:G:C4     | 1:A:215:U:C5   | 3.05                     | 0.44              |
| 2:B:51:LEU:HD21  | 2:B:86:ARG:O   | 2.18                     | 0.44              |
| 1:A:155:A:H2'    | 1:A:156:C:O4'  | 2.18                     | 0.44              |
| 1:A:179:U:H1'    | 1:A:234:G:OP1  | 2.17                     | 0.44              |
| 1:A:132:G:H2'    | 1:A:133:G:C8   | 2.53                     | 0.43              |
| 1:A:175:U:H2'    | 1:A:176:C:H6   | 1.82                     | 0.43              |
| 1:A:214:G:H2'    | 1:A:215:U:C6   | 2.53                     | 0.43              |
| 1:A:412:A:H2'    | 1:A:413:A:C8   | 2.53                     | 0.43              |
| 3:C:63:G:H2'     | 3:C:64:U:O4'   | 2.17                     | 0.43              |
| 1:A:314:G:C2     | 1:A:315:G:N7   | 2.86                     | 0.43              |
| 1:A:82:A:H2'     | 1:A:83:G:O4'   | 2.18                     | 0.43              |
| 1:A:102:C:O5'    | 1:A:102:C:H6   | 2.02                     | 0.43              |
| 1:A:393:U:H2'    | 1:A:394:G:C8   | 2.53                     | 0.43              |
| 1:A:63:A:H2'     | 1:A:64:C:O4'   | 2.18                     | 0.43              |
| 1:A:148:A:H61    | 1:A:177:G:H1'  | 1.83                     | 0.43              |
| 3:E:-7:U:H2'     | 3:E:-6:C:C6    | 2.53                     | 0.43              |
| 1:A:55:A:H2'     | 1:A:56:U:C6    | 2.53                     | 0.43              |
| 1:A:221:U:H2'    | 1:A:222:U:C6   | 2.53                     | 0.43              |
| 1:A:416:U:H2'    | 1:A:417:C:O4'  | 2.19                     | 0.43              |
| 1:A:321:G:H2'    | 1:A:322:C:O4'  | 2.19                     | 0.43              |
| 1:A:119:C:H2'    | 1:A:120:U:H6   | 1.84                     | 0.43              |
| 1:A:314:G:H1     | 1:A:323:A:N6   | 2.15                     | 0.43              |
| 1:A:173:G:H2'    | 1:A:174:U:H6   | 1.84                     | 0.42              |
| 3:E:-10:U:H2'    | 3:E:-9:U:C6    | 2.54                     | 0.42              |
| 1:A:7:C:H2'      | 1:A:8:A:C8     | 2.54                     | 0.42              |
| 2:B:105:LEU:HD23 | 2:B:105:LEU:HA | 1.80                     | 0.42              |
| 1:A:32:G:H2'     | 1:A:32:G:N3    | 2.35                     | 0.42              |
| 3:C:29:C:H2'     | 3:C:30:C:C6    | 2.54                     | 0.42              |
| 3:C:40:U:H2'     | 3:C:41:G:O4'   | 2.20                     | 0.42              |
| 1:A:6:U:H2'      | 1:A:7:C:H6     | 1.83                     | 0.42              |
| 1:A:167:G:H2'    | 1:A:168:A:H8   | 1.84                     | 0.42              |
| 3:C:43:G:H3'     | 3:C:44:G:C2'   | 2.49                     | 0.42              |
| 1:A:151:A:H2'    | 1:A:152:C:O4'  | 2.20                     | 0.42              |
| 1:A:156:C:O2'    | 1:A:157:G:H8   | 2.02                     | 0.42              |
| 1:A:197:A:N6     | 1:A:233:C:H42  | 2.14                     | 0.42              |
| 1:A:354:C:C2     | 1:A:355:G:C8   | 3.07                     | 0.42              |
| 2:B:73:GLU:C     | 2:B:73:GLU:OE1 | 2.63                     | 0.42              |

Continued on next page...

Continued from previous page...

| Atom-1          | Atom-2          | Interatomic distance (Å) | Clash overlap (Å) |
|-----------------|-----------------|--------------------------|-------------------|
| 3:C:42:G:H2'    | 3:C:43:G:C1'    | 2.49                     | 0.42              |
| 1:A:68:G:N3     | 1:A:68:G:H2'    | 2.35                     | 0.42              |
| 1:A:174:U:H2'   | 1:A:175:U:C6    | 2.53                     | 0.42              |
| 1:A:393:U:H2'   | 1:A:394:G:H8    | 1.84                     | 0.42              |
| 1:A:356:A:H3'   | 1:A:357:G:C8    | 2.55                     | 0.42              |
| 1:A:410:U:C2    | 1:A:411:U:C5    | 3.08                     | 0.42              |
| 1:A:201:A:H61   | 1:A:230:G:H1    | 1.67                     | 0.42              |
| 1:A:315:G:C6    | 1:A:316:C:N4    | 2.87                     | 0.42              |
| 3:C:37:A:H2'    | 3:C:38:G:H8     | 1.85                     | 0.42              |
| 3:C:44:G:H3'    | 3:C:44:G:P      | 2.60                     | 0.42              |
| 1:A:45:A:C2     | 1:A:388:G:H2'   | 2.54                     | 0.42              |
| 3:C:41:G:H2'    | 3:C:42:G:O4'    | 2.19                     | 0.42              |
| 1:A:292:A:H2'   | 1:A:292:A:N3    | 2.34                     | 0.41              |
| 1:A:369:C:H2'   | 1:A:370:U:C6    | 2.55                     | 0.41              |
| 1:A:16:G:H2'    | 1:A:17:U:H6     | 1.85                     | 0.41              |
| 1:A:75:U:O2'    | 1:A:76:G:P      | 2.78                     | 0.41              |
| 1:A:170:A:O2'   | 1:A:171:U:H5'   | 2.19                     | 0.41              |
| 1:A:313:C:C2    | 1:A:314:G:N7    | 2.88                     | 0.41              |
| 1:A:408:G:H2'   | 1:A:409:A:C8    | 2.54                     | 0.41              |
| 2:B:112:LYS:HB2 | 2:B:114:GLU:HG2 | 2.02                     | 0.41              |
| 3:C:24:C:C3'    | 3:C:25:A:H8     | 2.33                     | 0.41              |
| 3:C:49:C:H2'    | 3:C:50:G:H8     | 1.85                     | 0.41              |
| 1:A:59:U:O4'    | 1:A:257:A:H2    | 2.03                     | 0.41              |
| 1:A:161:G:H2'   | 1:A:162:G:O4'   | 2.20                     | 0.41              |
| 1:A:387:A:H5''  | 2:B:53:LYS:HD3  | 2.01                     | 0.41              |
| 1:A:120:U:H2'   | 1:A:121:G:C8    | 2.55                     | 0.41              |
| 1:A:380:A:C2    | 1:A:381:A:H1'   | 2.55                     | 0.41              |
| 1:A:193:C:H2'   | 1:A:194:C:C6    | 2.55                     | 0.41              |
| 1:A:262:A:H2'   | 1:A:263:A:C8    | 2.56                     | 0.41              |
| 1:A:56:U:O2'    | 1:A:100:A:N1    | 2.51                     | 0.41              |
| 1:A:193:C:H2'   | 1:A:194:C:H6    | 1.85                     | 0.41              |
| 1:A:198:G:N3    | 1:A:198:G:H2'   | 2.35                     | 0.41              |
| 1:A:305:A:H2'   | 1:A:306:G:O4'   | 2.21                     | 0.41              |
| 3:C:35:C:H2'    | 3:C:36:A:O4'    | 2.20                     | 0.41              |
| 1:A:88:C:H2'    | 1:A:89:G:C8     | 2.56                     | 0.41              |
| 3:C:66:U:H2'    | 3:C:67:U:C6     | 2.55                     | 0.41              |
| 1:A:4:A:H2'     | 1:A:5:A:C8      | 2.56                     | 0.41              |
| 1:A:131:G:H2'   | 1:A:132:G:O4'   | 2.20                     | 0.41              |
| 1:A:197:A:C6    | 1:A:199:U:C4    | 3.09                     | 0.41              |
| 3:C:20:A:N7     | 3:C:45:G:N7     | 2.68                     | 0.41              |
| 1:A:119:C:H2'   | 1:A:120:U:C6    | 2.55                     | 0.41              |

Continued on next page...

Continued from previous page...

| Atom-1          | Atom-2        | Interatomic distance (Å) | Clash overlap (Å) |
|-----------------|---------------|--------------------------|-------------------|
| 1:A:219:C:H2'   | 1:A:220:C:H6  | 1.84                     | 0.41              |
| 1:A:229:G:H2'   | 1:A:230:G:C8  | 2.56                     | 0.41              |
| 1:A:315:G:H2'   | 1:A:316:C:C5  | 2.56                     | 0.41              |
| 1:A:412:A:H2'   | 1:A:413:A:H8  | 1.86                     | 0.41              |
| 1:A:38:G:H2'    | 1:A:39:C:C6   | 2.56                     | 0.41              |
| 2:B:51:LEU:HD23 | 2:B:51:LEU:HA | 1.92                     | 0.41              |
| 3:C:9:A:C2      | 3:C:45:G:C6   | 3.08                     | 0.41              |
| 3:C:40:U:H2'    | 3:C:41:G:H8   | 1.86                     | 0.41              |
| 1:A:282:C:H2'   | 1:A:283:C:H6  | 1.86                     | 0.40              |
| 1:A:357:G:H21   | 1:A:368:G:H1  | 1.69                     | 0.40              |
| 1:A:160:C:C2    | 1:A:161:G:C8  | 3.09                     | 0.40              |
| 1:A:222:U:H2'   | 1:A:223:A:C8  | 2.56                     | 0.40              |
| 1:A:381:A:C2    | 1:A:382:G:H1' | 2.57                     | 0.40              |
| 2:B:43:ILE:HA   | 2:B:81:TYR:O  | 2.21                     | 0.40              |
| 1:A:357:G:H2'   | 1:A:358:G:H8  | 1.86                     | 0.40              |
| 1:A:414:C:C2    | 1:A:415:G:C8  | 3.09                     | 0.40              |
| 1:A:31:G:C2     | 1:A:32:G:C8   | 3.09                     | 0.40              |
| 1:A:173:G:H2'   | 1:A:174:U:C6  | 2.56                     | 0.40              |
| 1:A:396:C:H2'   | 1:A:397:U:C6  | 2.56                     | 0.40              |

There are no symmetry-related clashes.

## 5.3 Torsion angles [i](#)

### 5.3.1 Protein backbone [i](#)

In the following table, the Percentiles column shows the percent Ramachandran outliers of the chain as a percentile score with respect to all PDB entries followed by that with respect to all EM entries.

The Analysed column shows the number of residues for which the backbone conformation was analysed, and the total number of residues.

| Mol | Chain | Analysed      | Favoured  | Allowed | Outliers | Percentiles           |
|-----|-------|---------------|-----------|---------|----------|-----------------------|
| 2   | B     | 114/116 (98%) | 113 (99%) | 1 (1%)  | 0        | <b>100</b> <b>100</b> |

There are no Ramachandran outliers to report.

### 5.3.2 Protein sidechains [i](#)

In the following table, the Percentiles column shows the percent sidechain outliers of the chain as a percentile score with respect to all PDB entries followed by that with respect to all EM entries.

The Analysed column shows the number of residues for which the sidechain conformation was analysed, and the total number of residues.

| Mol | Chain | Analysed     | Rotameric | Outliers | Percentiles |
|-----|-------|--------------|-----------|----------|-------------|
| 2   | B     | 99/99 (100%) | 94 (95%)  | 5 (5%)   | 20 42       |

All (5) residues with a non-rotameric sidechain are listed below:

| Mol | Chain | Res | Type |
|-----|-------|-----|------|
| 2   | B     | 1   | MET  |
| 2   | B     | 12  | GLU  |
| 2   | B     | 35  | ARG  |
| 2   | B     | 96  | GLU  |
| 2   | B     | 113 | LYS  |

Sometimes sidechains can be flipped to improve hydrogen bonding and reduce clashes. There are no such sidechains identified.

### 5.3.3 RNA [i](#)

| Mol | Chain | Analysed      | Backbone Outliers | Pucker Outliers |
|-----|-------|---------------|-------------------|-----------------|
| 1   | A     | 416/417 (99%) | 135 (32%)         | 10 (2%)         |
| 3   | C     | 88/92 (95%)   | 30 (34%)          | 3 (3%)          |
| 3   | E     | 8/92 (8%)     | 3 (37%)           | 0               |
| All | All   | 512/601 (85%) | 168 (32%)         | 13 (2%)         |

All (168) RNA backbone outliers are listed below:

| Mol | Chain | Res | Type |
|-----|-------|-----|------|
| 1   | A     | 2   | U    |
| 1   | A     | 8   | A    |
| 1   | A     | 9   | U    |
| 1   | A     | 11  | C    |
| 1   | A     | 15  | G    |
| 1   | A     | 28  | G    |
| 1   | A     | 30  | C    |
| 1   | A     | 32  | G    |

*Continued on next page...*

*Continued from previous page...*

| Mol | Chain | Res | Type |
|-----|-------|-----|------|
| 1   | A     | 33  | U    |
| 1   | A     | 35  | U    |
| 1   | A     | 36  | C    |
| 1   | A     | 48  | A    |
| 1   | A     | 49  | A    |
| 1   | A     | 50  | A    |
| 1   | A     | 52  | U    |
| 1   | A     | 53  | C    |
| 1   | A     | 60  | C    |
| 1   | A     | 65  | G    |
| 1   | A     | 66  | G    |
| 1   | A     | 67  | U    |
| 1   | A     | 68  | G    |
| 1   | A     | 69  | C    |
| 1   | A     | 70  | U    |
| 1   | A     | 72  | A    |
| 1   | A     | 74  | A    |
| 1   | A     | 75  | U    |
| 1   | A     | 76  | G    |
| 1   | A     | 80  | G    |
| 1   | A     | 81  | U    |
| 1   | A     | 85  | G    |
| 1   | A     | 87  | U    |
| 1   | A     | 88  | C    |
| 1   | A     | 89  | G    |
| 1   | A     | 91  | G    |
| 1   | A     | 99  | A    |
| 1   | A     | 100 | A    |
| 1   | A     | 101 | U    |
| 1   | A     | 102 | C    |
| 1   | A     | 117 | G    |
| 1   | A     | 118 | C    |
| 1   | A     | 121 | G    |
| 1   | A     | 122 | G    |
| 1   | A     | 123 | C    |
| 1   | A     | 126 | C    |
| 1   | A     | 127 | G    |
| 1   | A     | 128 | G    |
| 1   | A     | 132 | G    |
| 1   | A     | 134 | C    |
| 1   | A     | 135 | U    |
| 1   | A     | 137 | A    |

*Continued on next page...*

*Continued from previous page...*

| Mol | Chain | Res | Type |
|-----|-------|-----|------|
| 1   | A     | 138 | C    |
| 1   | A     | 139 | G    |
| 1   | A     | 141 | C    |
| 1   | A     | 142 | G    |
| 1   | A     | 146 | A    |
| 1   | A     | 149 | G    |
| 1   | A     | 150 | A    |
| 1   | A     | 151 | A    |
| 1   | A     | 152 | C    |
| 1   | A     | 164 | U    |
| 1   | A     | 171 | U    |
| 1   | A     | 172 | G    |
| 1   | A     | 177 | G    |
| 1   | A     | 178 | A    |
| 1   | A     | 179 | U    |
| 1   | A     | 180 | U    |
| 1   | A     | 183 | C    |
| 1   | A     | 186 | G    |
| 1   | A     | 187 | A    |
| 1   | A     | 190 | G    |
| 1   | A     | 192 | G    |
| 1   | A     | 198 | G    |
| 1   | A     | 199 | U    |
| 1   | A     | 200 | G    |
| 1   | A     | 203 | G    |
| 1   | A     | 204 | G    |
| 1   | A     | 207 | C    |
| 1   | A     | 208 | U    |
| 1   | A     | 213 | G    |
| 1   | A     | 214 | G    |
| 1   | A     | 219 | C    |
| 1   | A     | 226 | G    |
| 1   | A     | 227 | G    |
| 1   | A     | 234 | G    |
| 1   | A     | 236 | G    |
| 1   | A     | 237 | G    |
| 1   | A     | 239 | A    |
| 1   | A     | 240 | A    |
| 1   | A     | 241 | A    |
| 1   | A     | 250 | G    |
| 1   | A     | 255 | A    |
| 1   | A     | 266 | A    |

*Continued on next page...*

*Continued from previous page...*

| Mol | Chain | Res | Type |
|-----|-------|-----|------|
| 1   | A     | 267 | U    |
| 1   | A     | 271 | A    |
| 1   | A     | 272 | G    |
| 1   | A     | 276 | C    |
| 1   | A     | 278 | C    |
| 1   | A     | 292 | A    |
| 1   | A     | 294 | G    |
| 1   | A     | 299 | G    |
| 1   | A     | 304 | A    |
| 1   | A     | 311 | G    |
| 1   | A     | 312 | G    |
| 1   | A     | 313 | C    |
| 1   | A     | 314 | G    |
| 1   | A     | 317 | G    |
| 1   | A     | 318 | C    |
| 1   | A     | 321 | G    |
| 1   | A     | 323 | A    |
| 1   | A     | 324 | G    |
| 1   | A     | 328 | G    |
| 1   | A     | 330 | A    |
| 1   | A     | 334 | A    |
| 1   | A     | 342 | A    |
| 1   | A     | 346 | C    |
| 1   | A     | 348 | G    |
| 1   | A     | 349 | G    |
| 1   | A     | 350 | A    |
| 1   | A     | 351 | G    |
| 1   | A     | 362 | A    |
| 1   | A     | 365 | G    |
| 1   | A     | 366 | C    |
| 1   | A     | 367 | C    |
| 1   | A     | 368 | G    |
| 1   | A     | 369 | C    |
| 1   | A     | 372 | G    |
| 1   | A     | 373 | C    |
| 1   | A     | 376 | U    |
| 1   | A     | 379 | G    |
| 1   | A     | 381 | A    |
| 1   | A     | 382 | G    |
| 1   | A     | 383 | G    |
| 1   | A     | 389 | A    |
| 1   | A     | 408 | G    |

*Continued on next page...*

Continued from previous page...

| Mol | Chain | Res | Type |
|-----|-------|-----|------|
| 1   | A     | 410 | U    |
| 3   | C     | -8  | U    |
| 3   | C     | -7  | U    |
| 3   | C     | -6  | C    |
| 3   | C     | -4  | C    |
| 3   | C     | -3  | U    |
| 3   | C     | -1  | U    |
| 3   | C     | 7   | G    |
| 3   | C     | 8   | U    |
| 3   | C     | 10  | G    |
| 3   | C     | 12  | U    |
| 3   | C     | 13  | C    |
| 3   | C     | 14  | A    |
| 3   | C     | 17  | G    |
| 3   | C     | 18  | G    |
| 3   | C     | 19  | U    |
| 3   | C     | 20  | A    |
| 3   | C     | 23  | A    |
| 3   | C     | 26  | C    |
| 3   | C     | 29  | C    |
| 3   | C     | 37  | A    |
| 3   | C     | 41  | G    |
| 3   | C     | 44  | G    |
| 3   | C     | 45  | G    |
| 3   | C     | 46  | U    |
| 3   | C     | 47  | C    |
| 3   | C     | 48  | G    |
| 3   | C     | 52  | G    |
| 3   | C     | 58  | G    |
| 3   | C     | 63  | G    |
| 3   | C     | 70  | G    |
| 3   | E     | -11 | A    |
| 3   | E     | -10 | U    |
| 3   | E     | -7  | U    |

All (13) RNA pucker outliers are listed below:

| Mol | Chain | Res | Type |
|-----|-------|-----|------|
| 1   | A     | 67  | U    |
| 1   | A     | 75  | U    |
| 1   | A     | 122 | G    |
| 1   | A     | 126 | C    |

Continued on next page...

*Continued from previous page...*

| Mol | Chain | Res | Type |
|-----|-------|-----|------|
| 1   | A     | 137 | A    |
| 1   | A     | 176 | C    |
| 1   | A     | 212 | A    |
| 1   | A     | 239 | A    |
| 1   | A     | 240 | A    |
| 1   | A     | 349 | G    |
| 3   | C     | -4  | C    |
| 3   | C     | 19  | U    |
| 3   | C     | 46  | U    |

#### 5.4 Non-standard residues in protein, DNA, RNA chains [i](#)

There are no non-standard protein/DNA/RNA residues in this entry.

#### 5.5 Carbohydrates [i](#)

There are no oligosaccharides in this entry.

#### 5.6 Ligand geometry [i](#)

Of 24 ligands modelled in this entry, 24 are monoatomic - leaving 0 for Mogul analysis.

There are no bond length outliers.

There are no bond angle outliers.

There are no chirality outliers.

There are no torsion outliers.

There are no ring outliers.

No monomer is involved in short contacts.

#### 5.7 Other polymers [i](#)

There are no such residues in this entry.

#### 5.8 Polymer linkage issues [i](#)

There are no chain breaks in this entry.

## 6 Map visualisation [i](#)

This section contains visualisations of the EMDB entry EMD-71000. These allow visual inspection of the internal detail of the map and identification of artifacts.

Images derived from a raw map, generated by summing the deposited half-maps, are presented below the corresponding image components of the primary map to allow further visual inspection and comparison with those of the primary map.

### 6.1 Orthogonal projections [i](#)

#### 6.1.1 Primary map

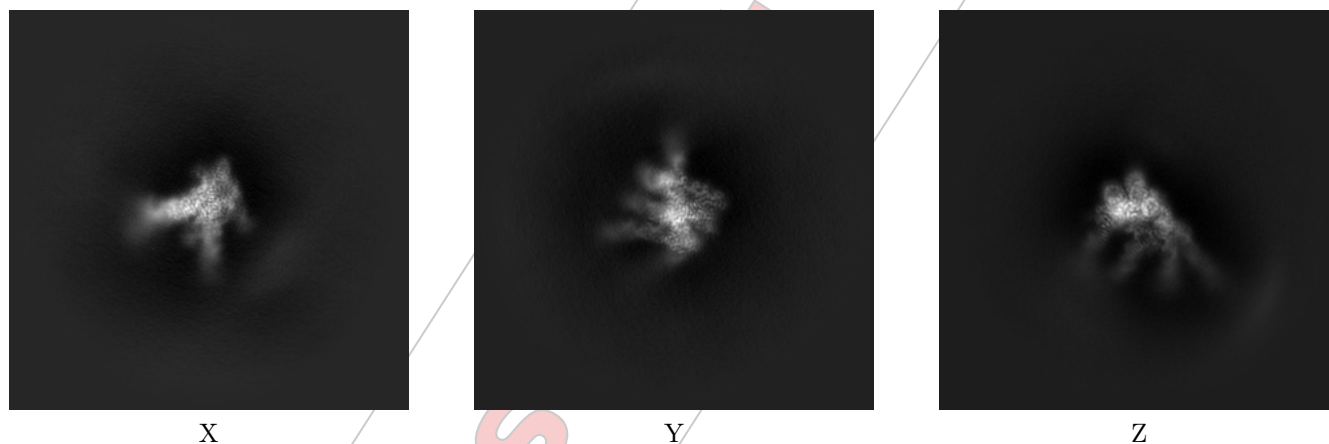

#### 6.1.2 Raw map

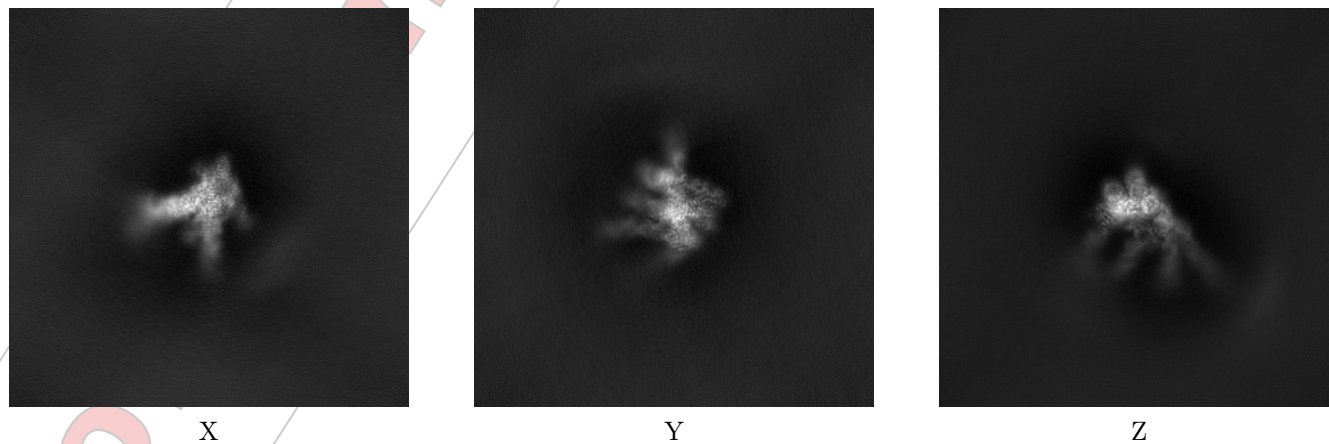

The images above show the map projected in three orthogonal directions.

## 6.2 Central slices [i](#)

### 6.2.1 Primary map

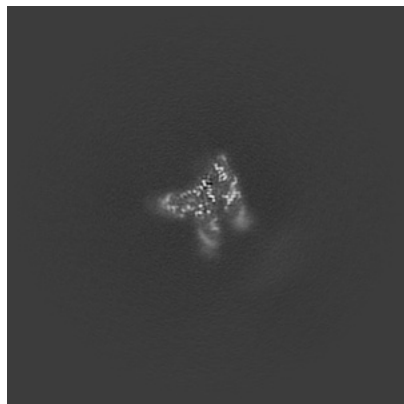

X Index: 200

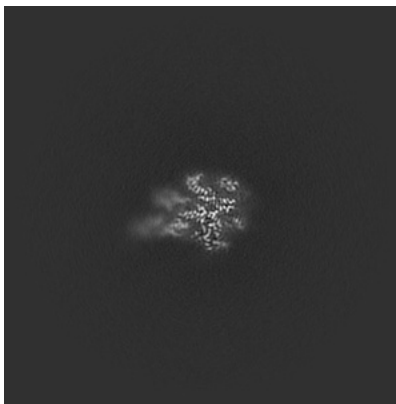

Y Index: 200

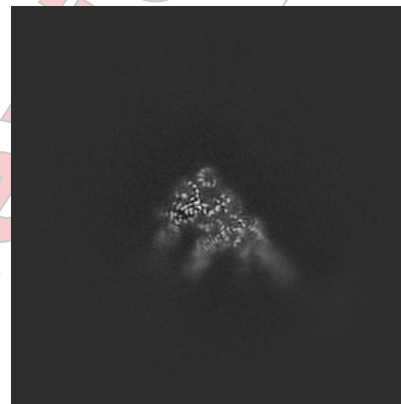

Z Index: 200

### 6.2.2 Raw map

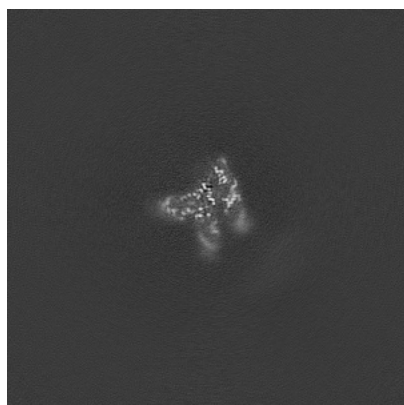

X Index: 200

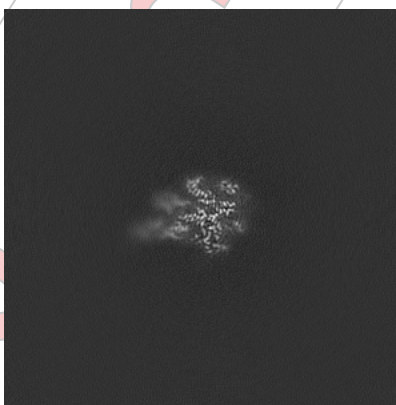

Y Index: 200

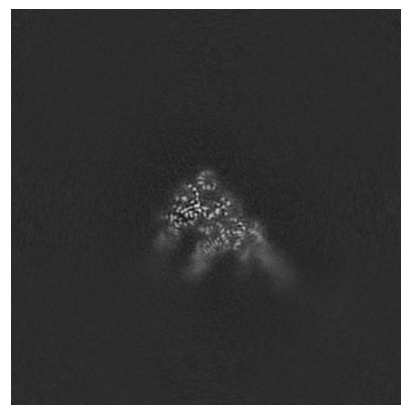

Z Index: 200

The images above show central slices of the map in three orthogonal directions.

## 6.3 Largest variance slices [i](#)

### 6.3.1 Primary map

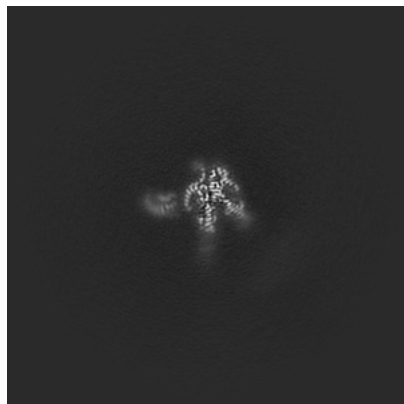

X Index: 192



Y Index: 200

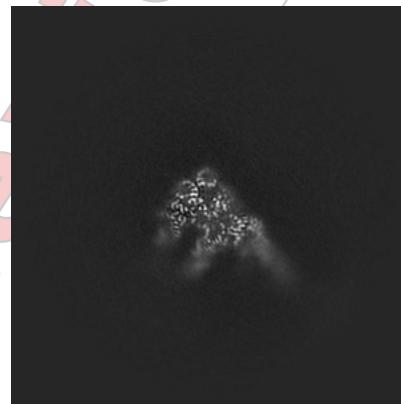

Z Index: 202

### 6.3.2 Raw map

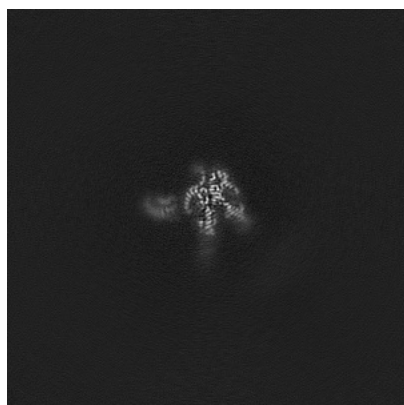

X Index: 192



Y Index: 200

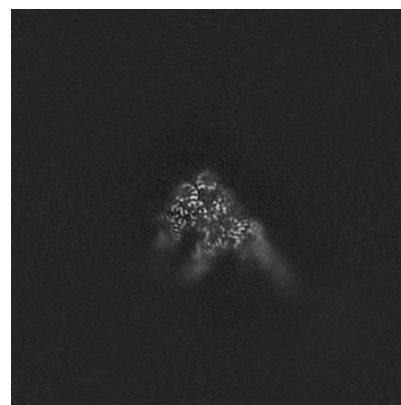

Z Index: 202

The images above show the largest variance slices of the map in three orthogonal directions.

## 6.4 Orthogonal standard-deviation projections (False-color) [i](#)

### 6.4.1 Primary map

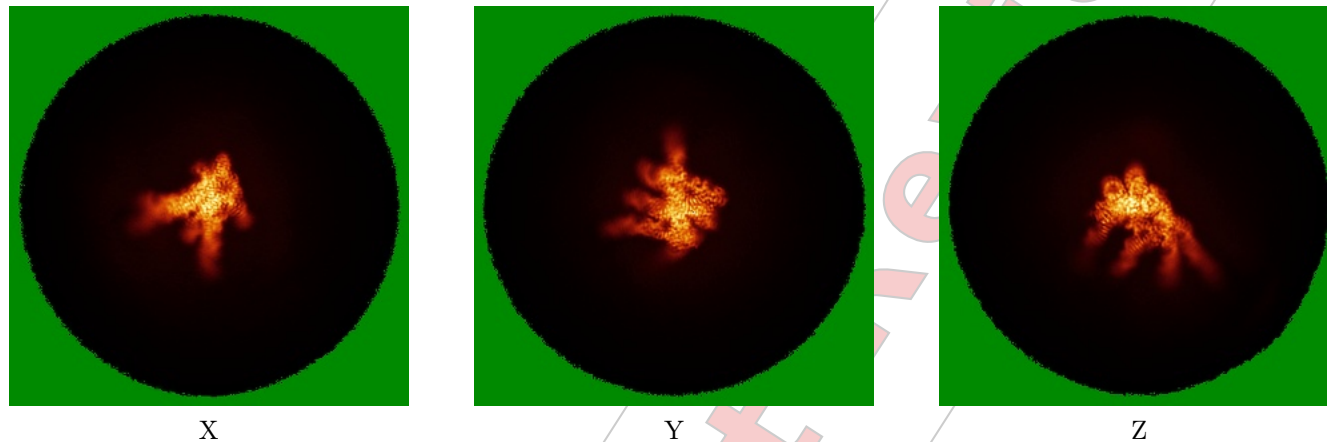

### 6.4.2 Raw map

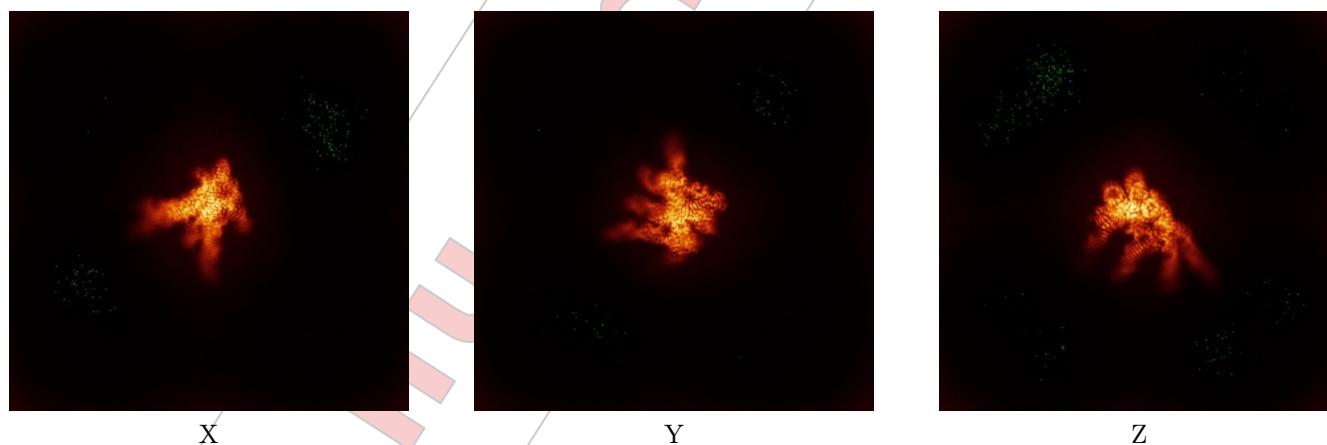

The images above show the map standard deviation projections with false color in three orthogonal directions. Minimum values are shown in green, max in blue, and dark to light orange shades represent small to large values respectively.

## 6.5 Orthogonal surface views [i](#)

### 6.5.1 Primary map

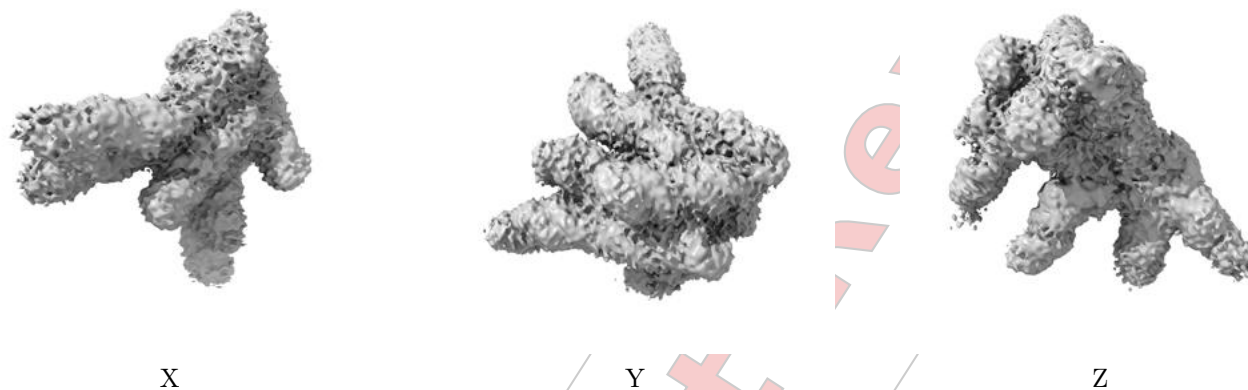

The images above show the 3D surface view of the map at the recommended contour level 0.035. These images, in conjunction with the slice images, may facilitate assessment of whether an appropriate contour level has been provided.

### 6.5.2 Raw map

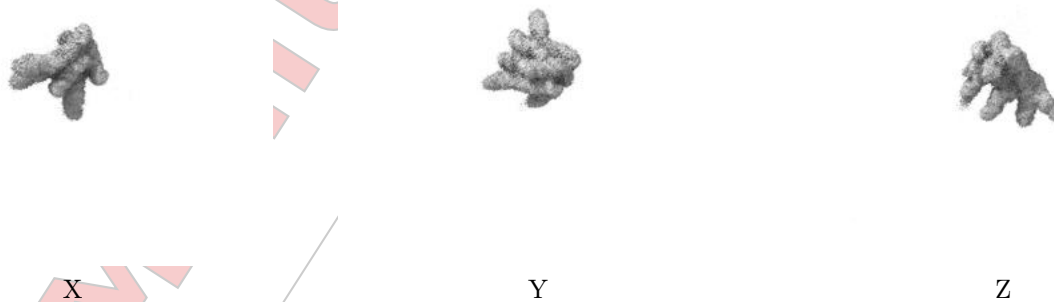

These images show the 3D surface of the raw map. The raw map's contour level was selected so that its surface encloses the same volume as the primary map does at its recommended contour level.

## 6.6 Mask visualisation [i](#)

This section was not generated. No masks/segmentation were deposited.

## 7 Map analysis [i](#)

This section contains the results of statistical analysis of the map.

### 7.1 Map-value distribution [i](#)

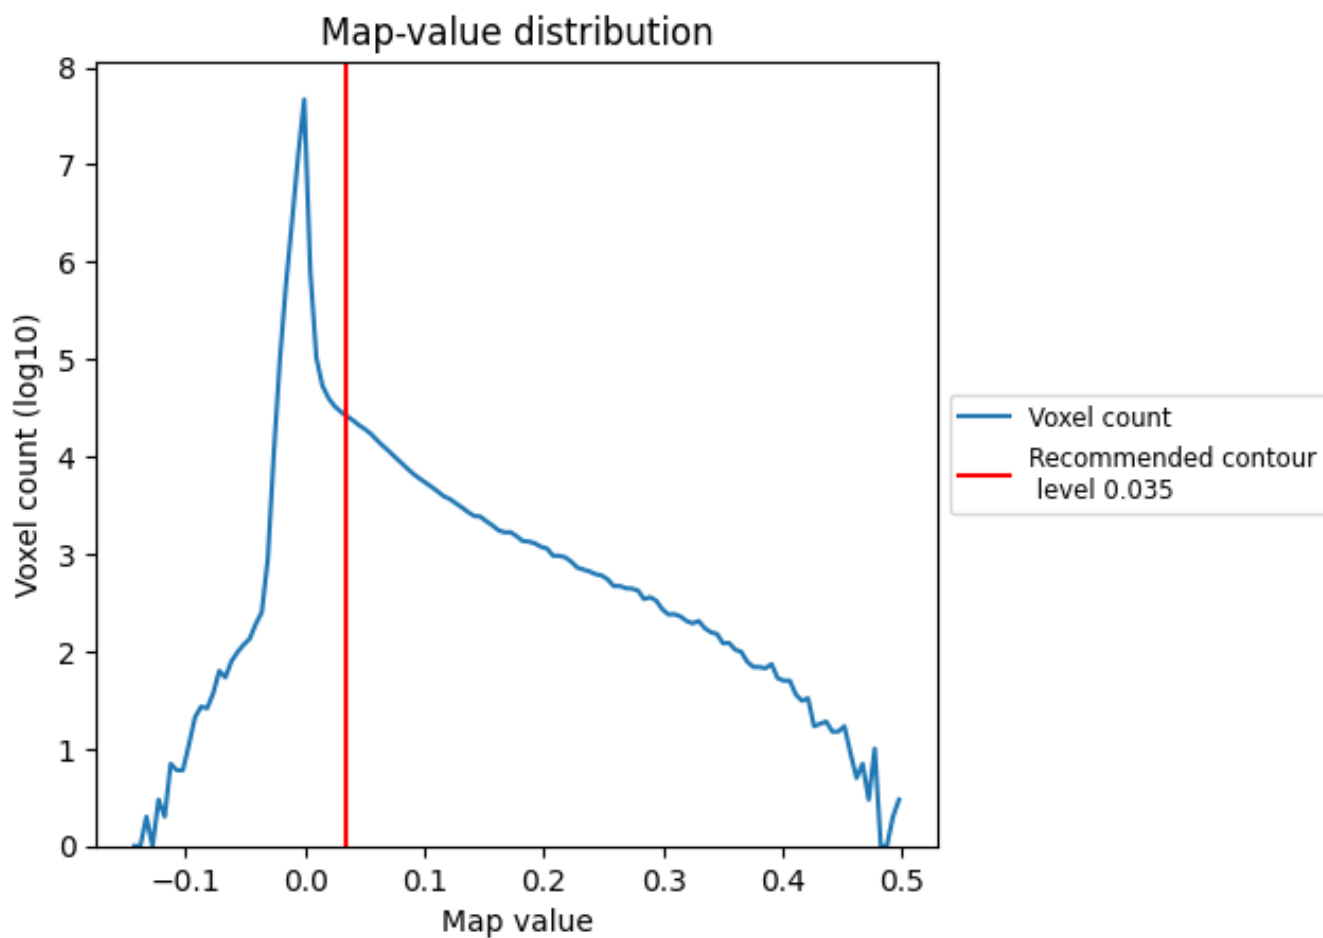

The map-value distribution is plotted in 128 intervals along the x-axis. The y-axis is logarithmic. A spike in this graph at zero usually indicates that the volume has been masked.

## 7.2 Volume estimate [i](#)

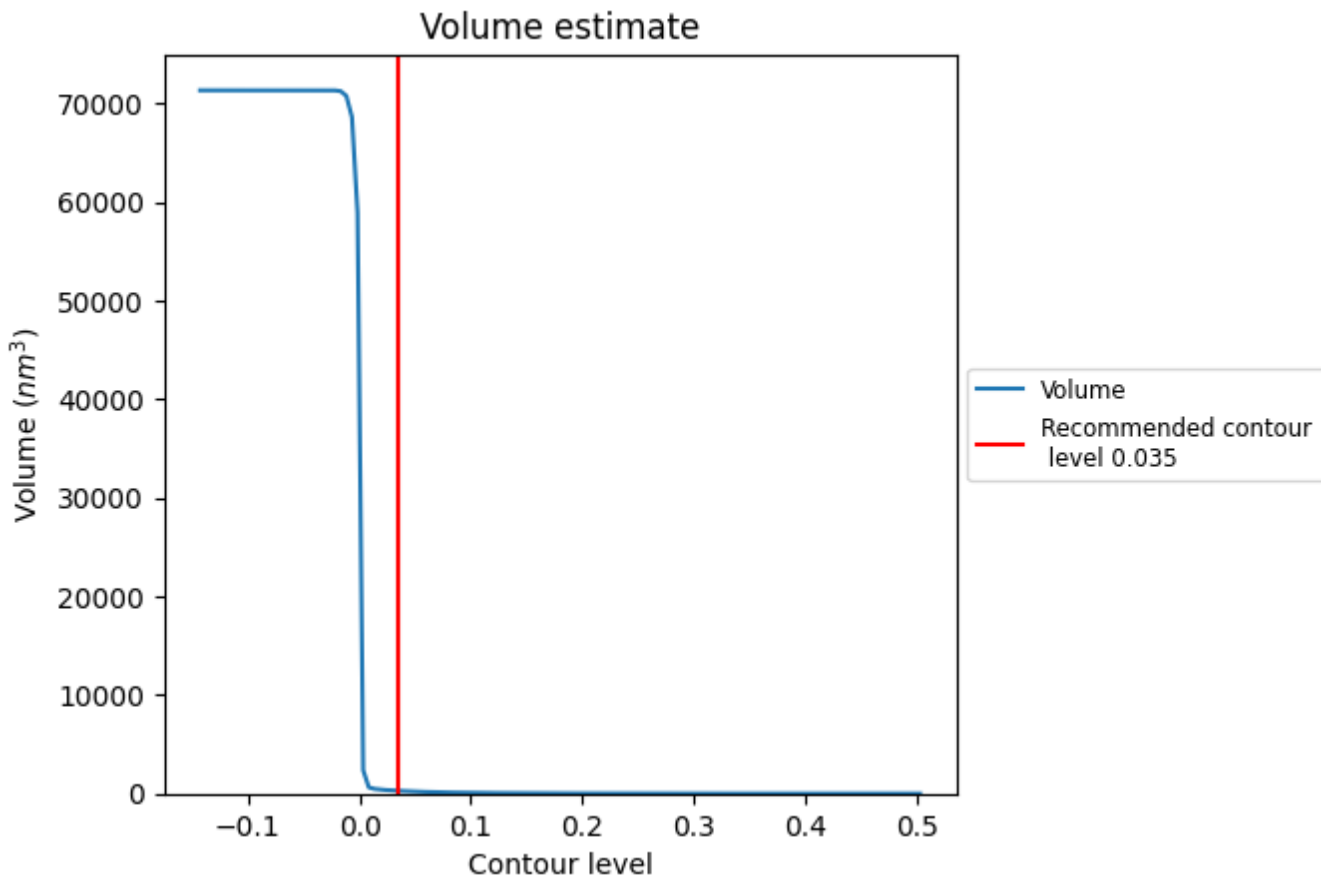

The volume at the recommended contour level is 282  $\text{nm}^3$ ; this corresponds to an approximate mass of 255 kDa.

The volume estimate graph shows how the enclosed volume varies with the contour level. The recommended contour level is shown as a vertical line and the intersection between the line and the curve gives the volume of the enclosed surface at the given level.

7.3 Rotationally averaged power spectrum 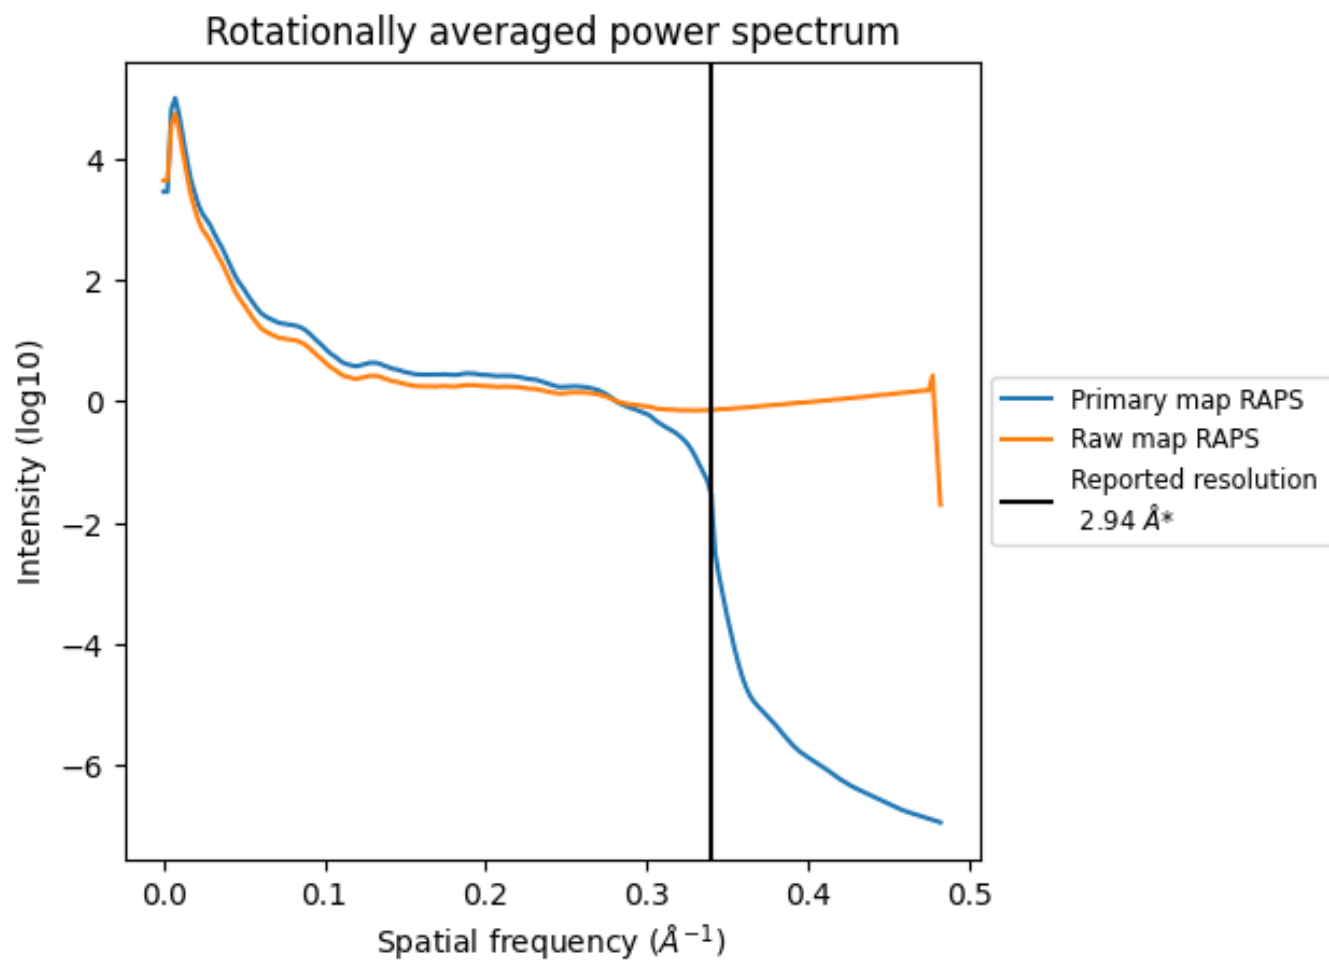

\*Reported resolution corresponds to spatial frequency of 0.340 Å<sup>-1</sup>

## 8 Fourier-Shell correlation [\(i\)](#)

Fourier-Shell Correlation (FSC) is the most commonly used method to estimate the resolution of single-particle and subtomogram-averaged maps. The shape of the curve depends on the imposed symmetry, mask and whether or not the two 3D reconstructions used were processed from a common reference. The reported resolution is shown as a black line. A curve is displayed for the half-bit criterion in addition to lines showing the 0.143 gold standard cut-off and 0.5 cut-off.

### 8.1 FSC [\(i\)](#)

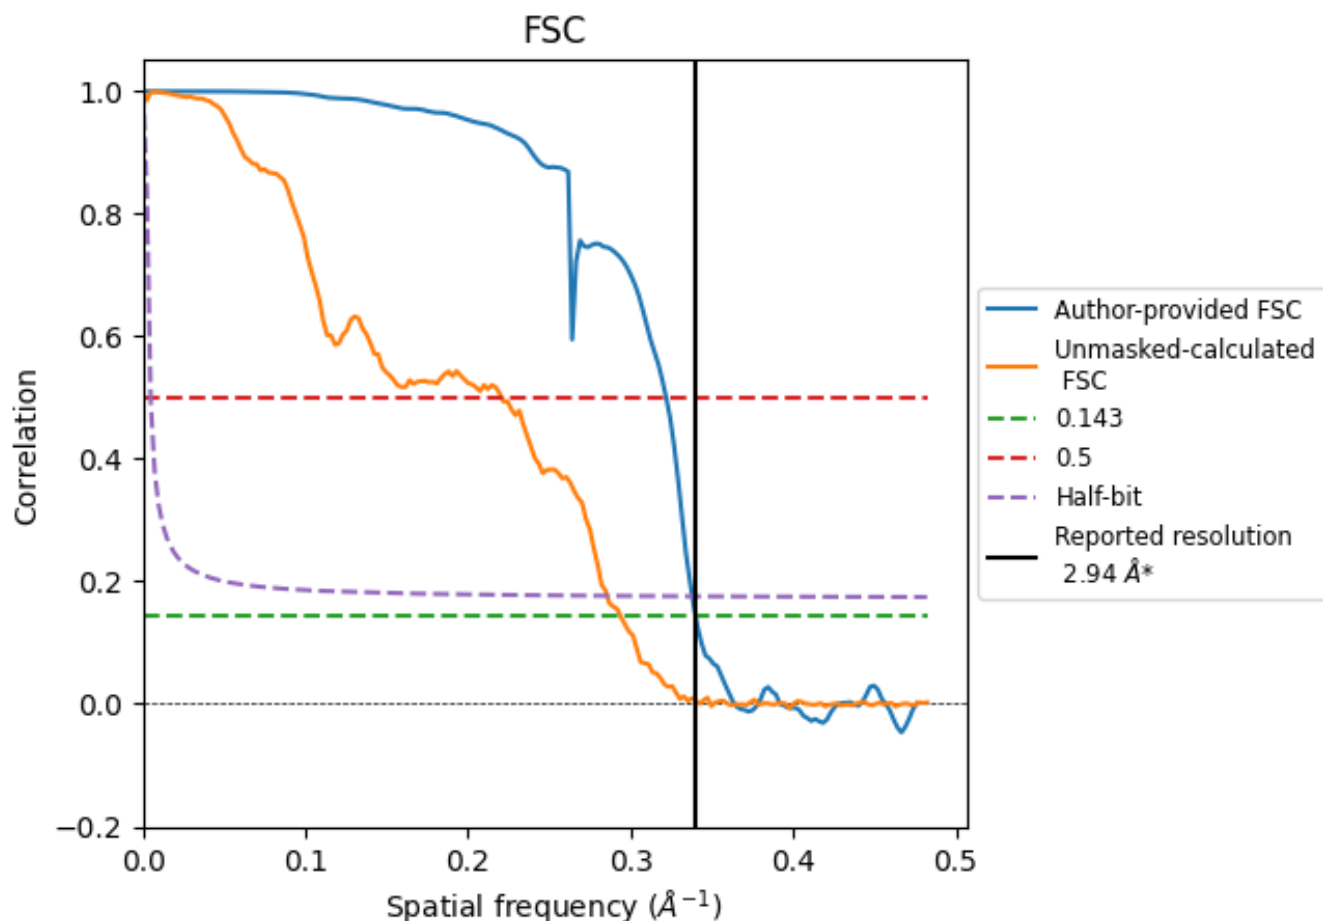

\*Reported resolution corresponds to spatial frequency of 0.340 Å<sup>-1</sup>

## 8.2 Resolution estimates [i](#)

| Resolution estimate (Å)   | Estimation criterion (FSC cut-off) |      |          |
|---------------------------|------------------------------------|------|----------|
|                           | 0.143                              | 0.5  | Half-bit |
| Reported by author        | 2.94                               | -    | -        |
| Author-provided FSC curve | 2.94                               | 3.11 | 2.96     |
| Unmasked-calculated*      | 3.40                               | 4.53 | 3.50     |

\*Resolution estimate based on FSC curve calculated by comparison of deposited half-maps. The value from deposited half-maps intersecting FSC 0.143 CUT-OFF 3.40 differs from the reported value 2.94 by more than 10 %

## 9 Map-model fit [i](#)

This section contains information regarding the fit between EMDB map EMD-71000 and PDB model 9OY7. Per-residue inclusion information can be found in section 3 on page 5.

### 9.1 Map-model overlay [i](#)

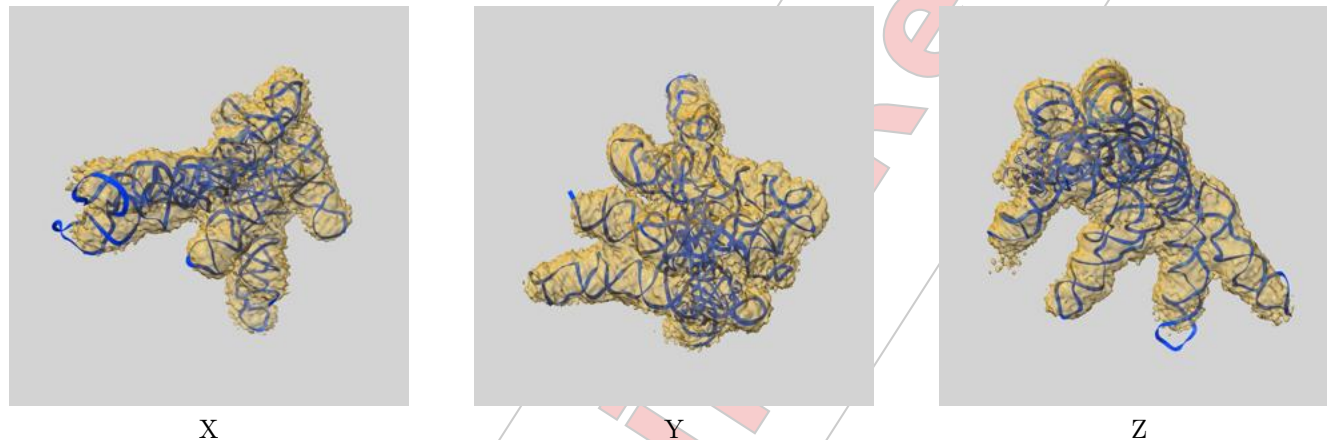

The images above show the 3D surface view of the map at the recommended contour level 0.035 at 50% transparency in yellow overlaid with a ribbon representation of the model coloured in blue. These images allow for the visual assessment of the quality of fit between the atomic model and the map.

## 9.2 Q-score mapped to coordinate model [\(i\)](#)

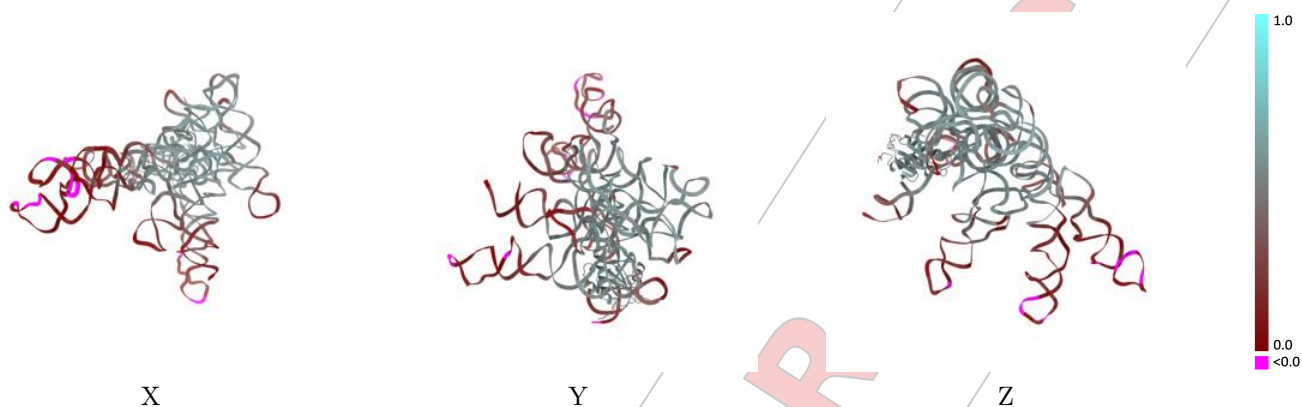

The images above show the model with each residue coloured according to its Q-score. This shows their resolvability in the map with higher Q-score values reflecting better resolvability. Please note: Q-score is calculating the resolvability of atoms, and thus high values are only expected at resolutions at which atoms can be resolved. Low Q-score values may therefore be expected for many entries.

## 9.3 Atom inclusion mapped to coordinate model [\(i\)](#)

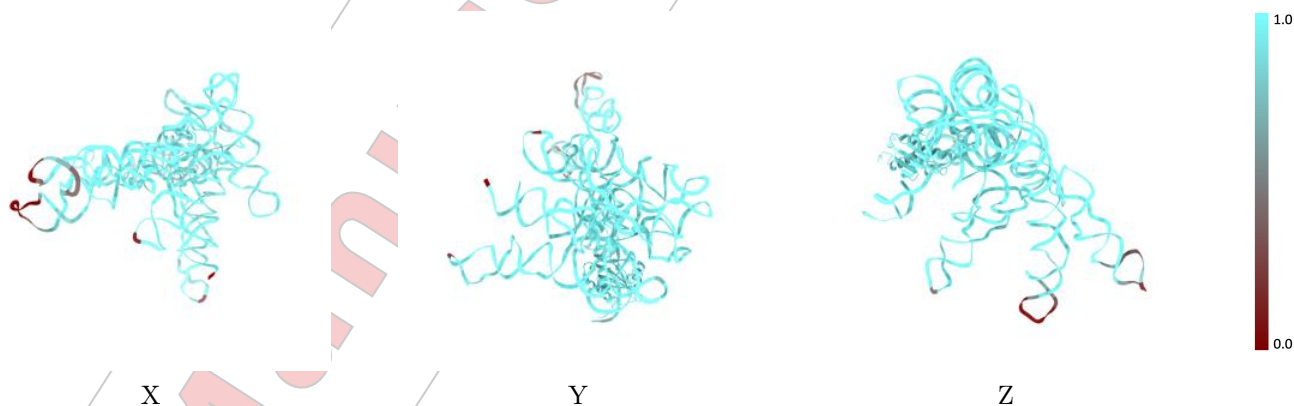

The images above show the model with each residue coloured according to its atom inclusion. This shows to what extent they are inside the map at the recommended contour level (0.035).

## 9.4 Atom inclusion (i)

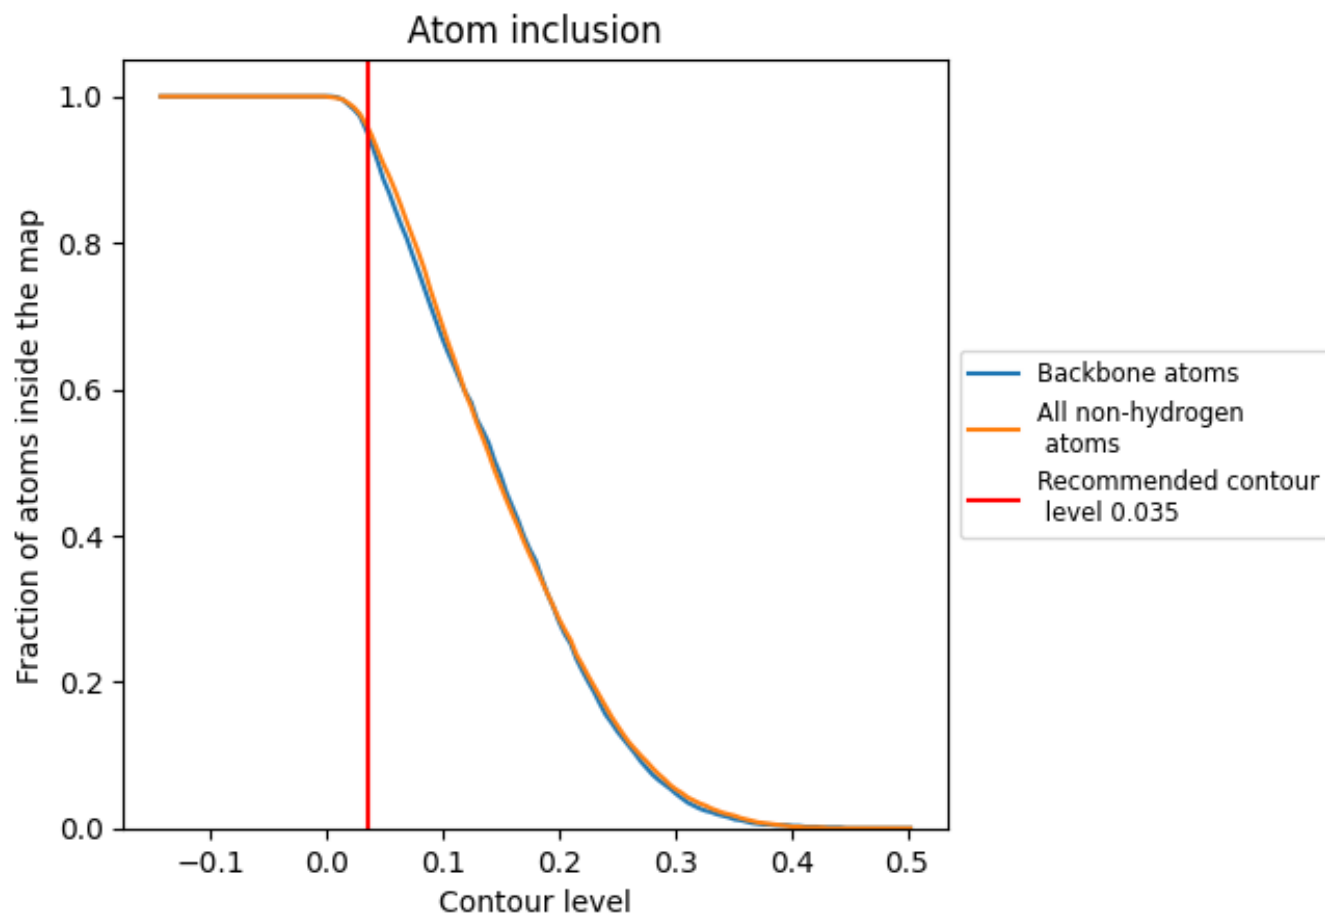

At the recommended contour level, 95% of all backbone atoms, 96% of all non-hydrogen atoms, are inside the map.

## 9.5 Map-model fit summary

The table lists the average atom inclusion at the recommended contour level (0.035) and Q-score for the entire model and for each chain.

| Chain | Atom inclusion                                                                           | Q-score                                                                                  |
|-------|------------------------------------------------------------------------------------------|------------------------------------------------------------------------------------------|
| All   |  0.9590 |  0.3880 |
| A     |  0.9510 |  0.3730 |
| B     |  0.9960 |  0.5390 |
| C     |  0.9830 |  0.3920 |
| E     |  0.9250 |  0.2820 |



Supplement: Supplementary file 4 [file b0a3b1282a60227a84f03415.pdf]
