# Supplementary material for: Three-metal-ion catalysis by ribonuclease P holoenzyme: a new mechanistic insight into transfer RNA maturation
Source: Research Square preprint supplement (doi:10.21203/rs.3.rs-9187222/v1), 2026-05-14
Supplement: Supplementary file 1 [file 1c21cac4bce64c99534e750d.pdf]

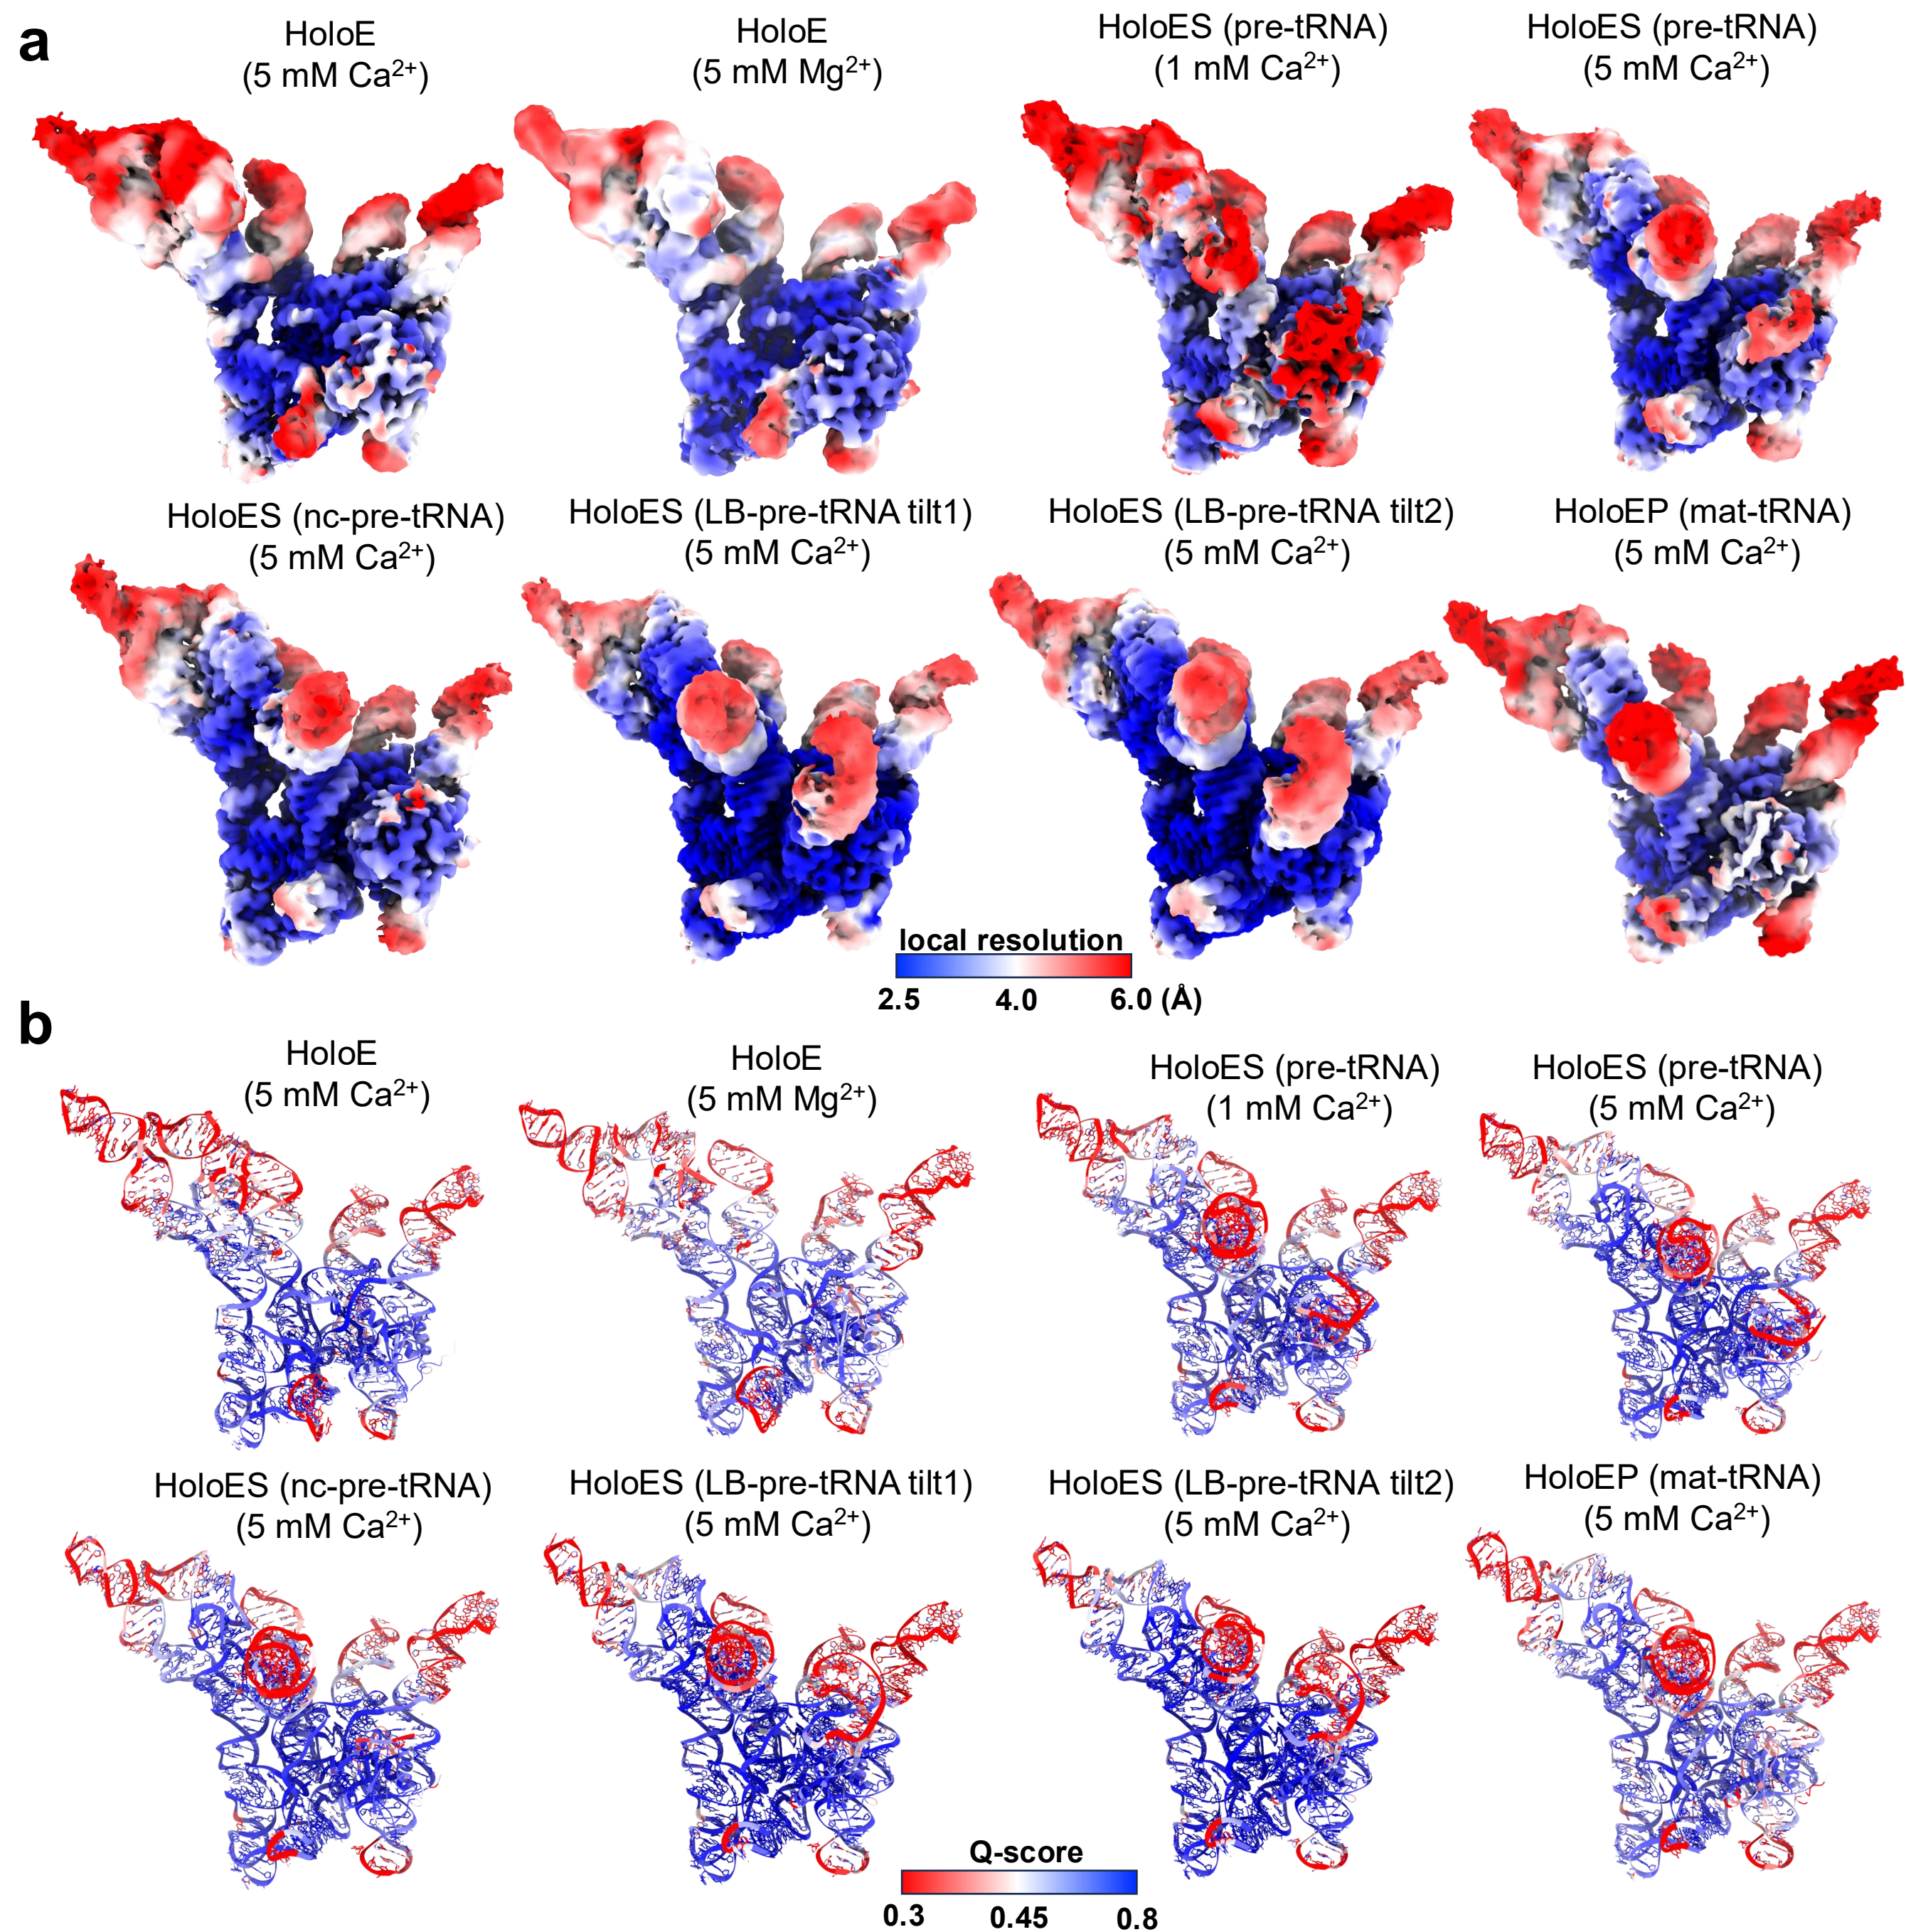

**Extended Data Fig. 1 | Local structural resolution of cryo-EM volumes and Q-score assessments for corresponding all-atom models. a**, Local resolution estimation and **b**, per-nucleotide Q-score mapping of the cryo-EM consensus volumes of the 8 wild-type RNase P holoenzymes in this study. The local resolution and Q-score were mapped on all volumes from blue, white, and red in an ascending and descending manner on the scale bar, respectively.

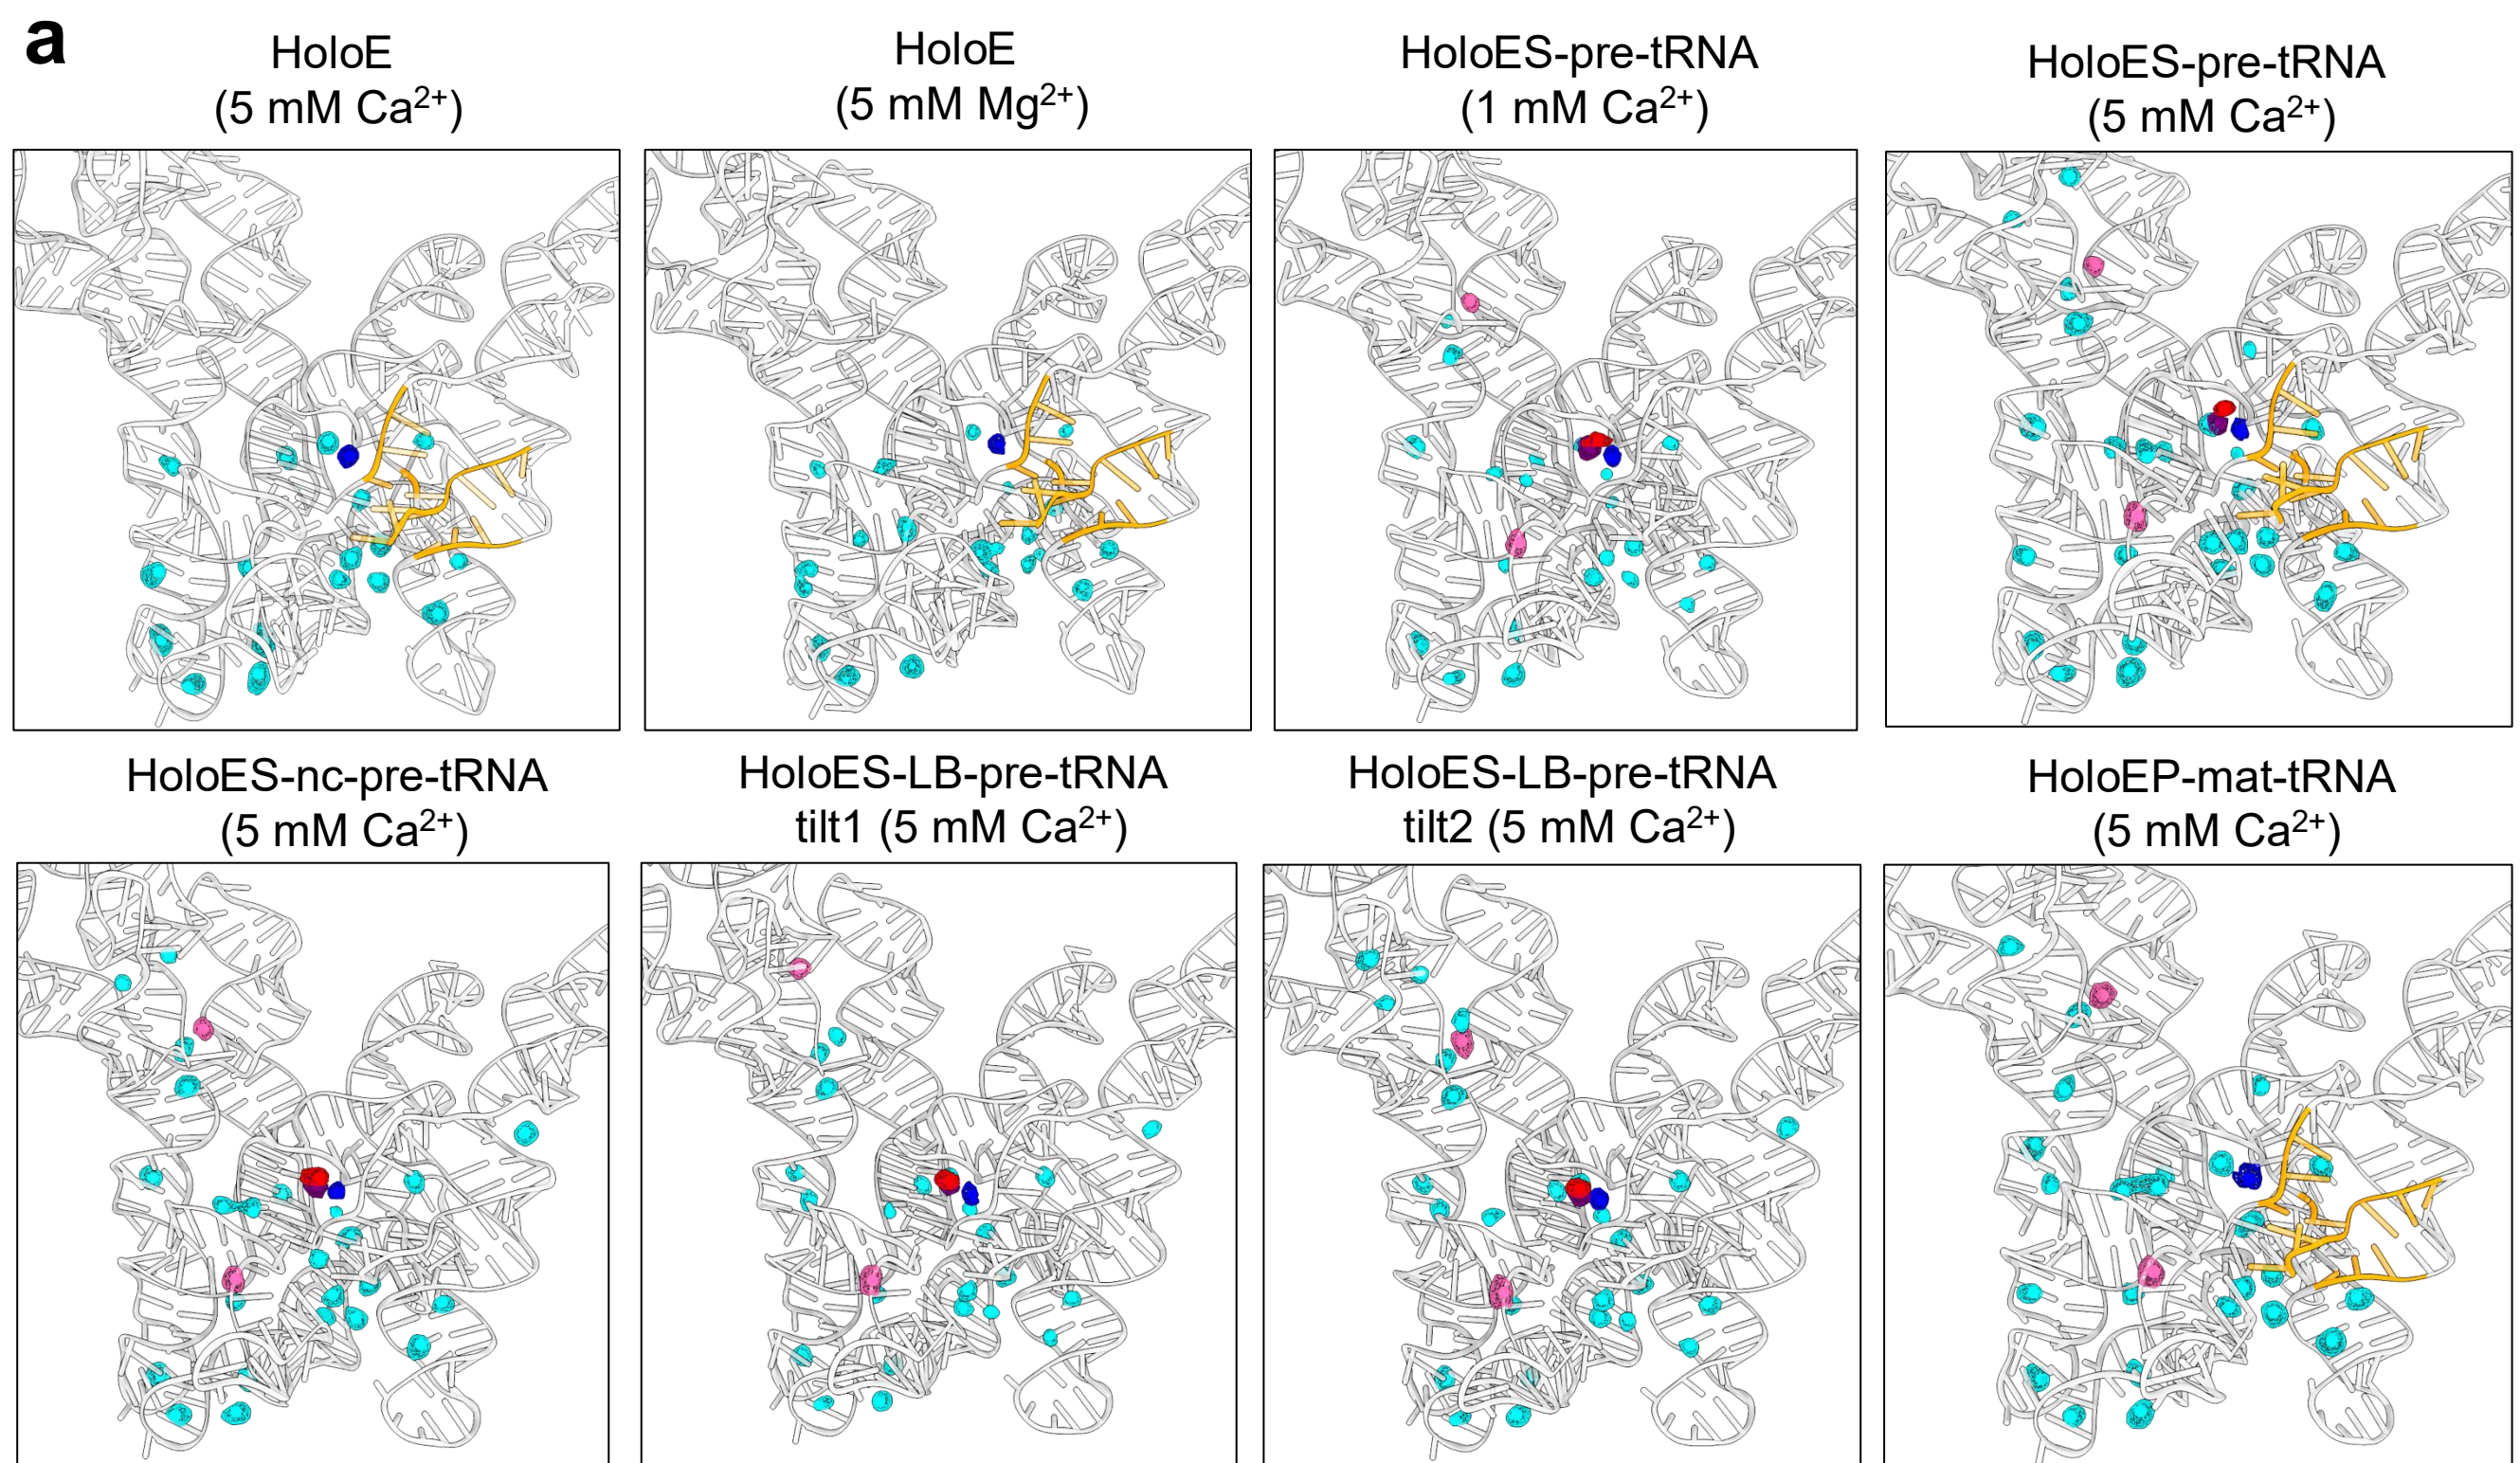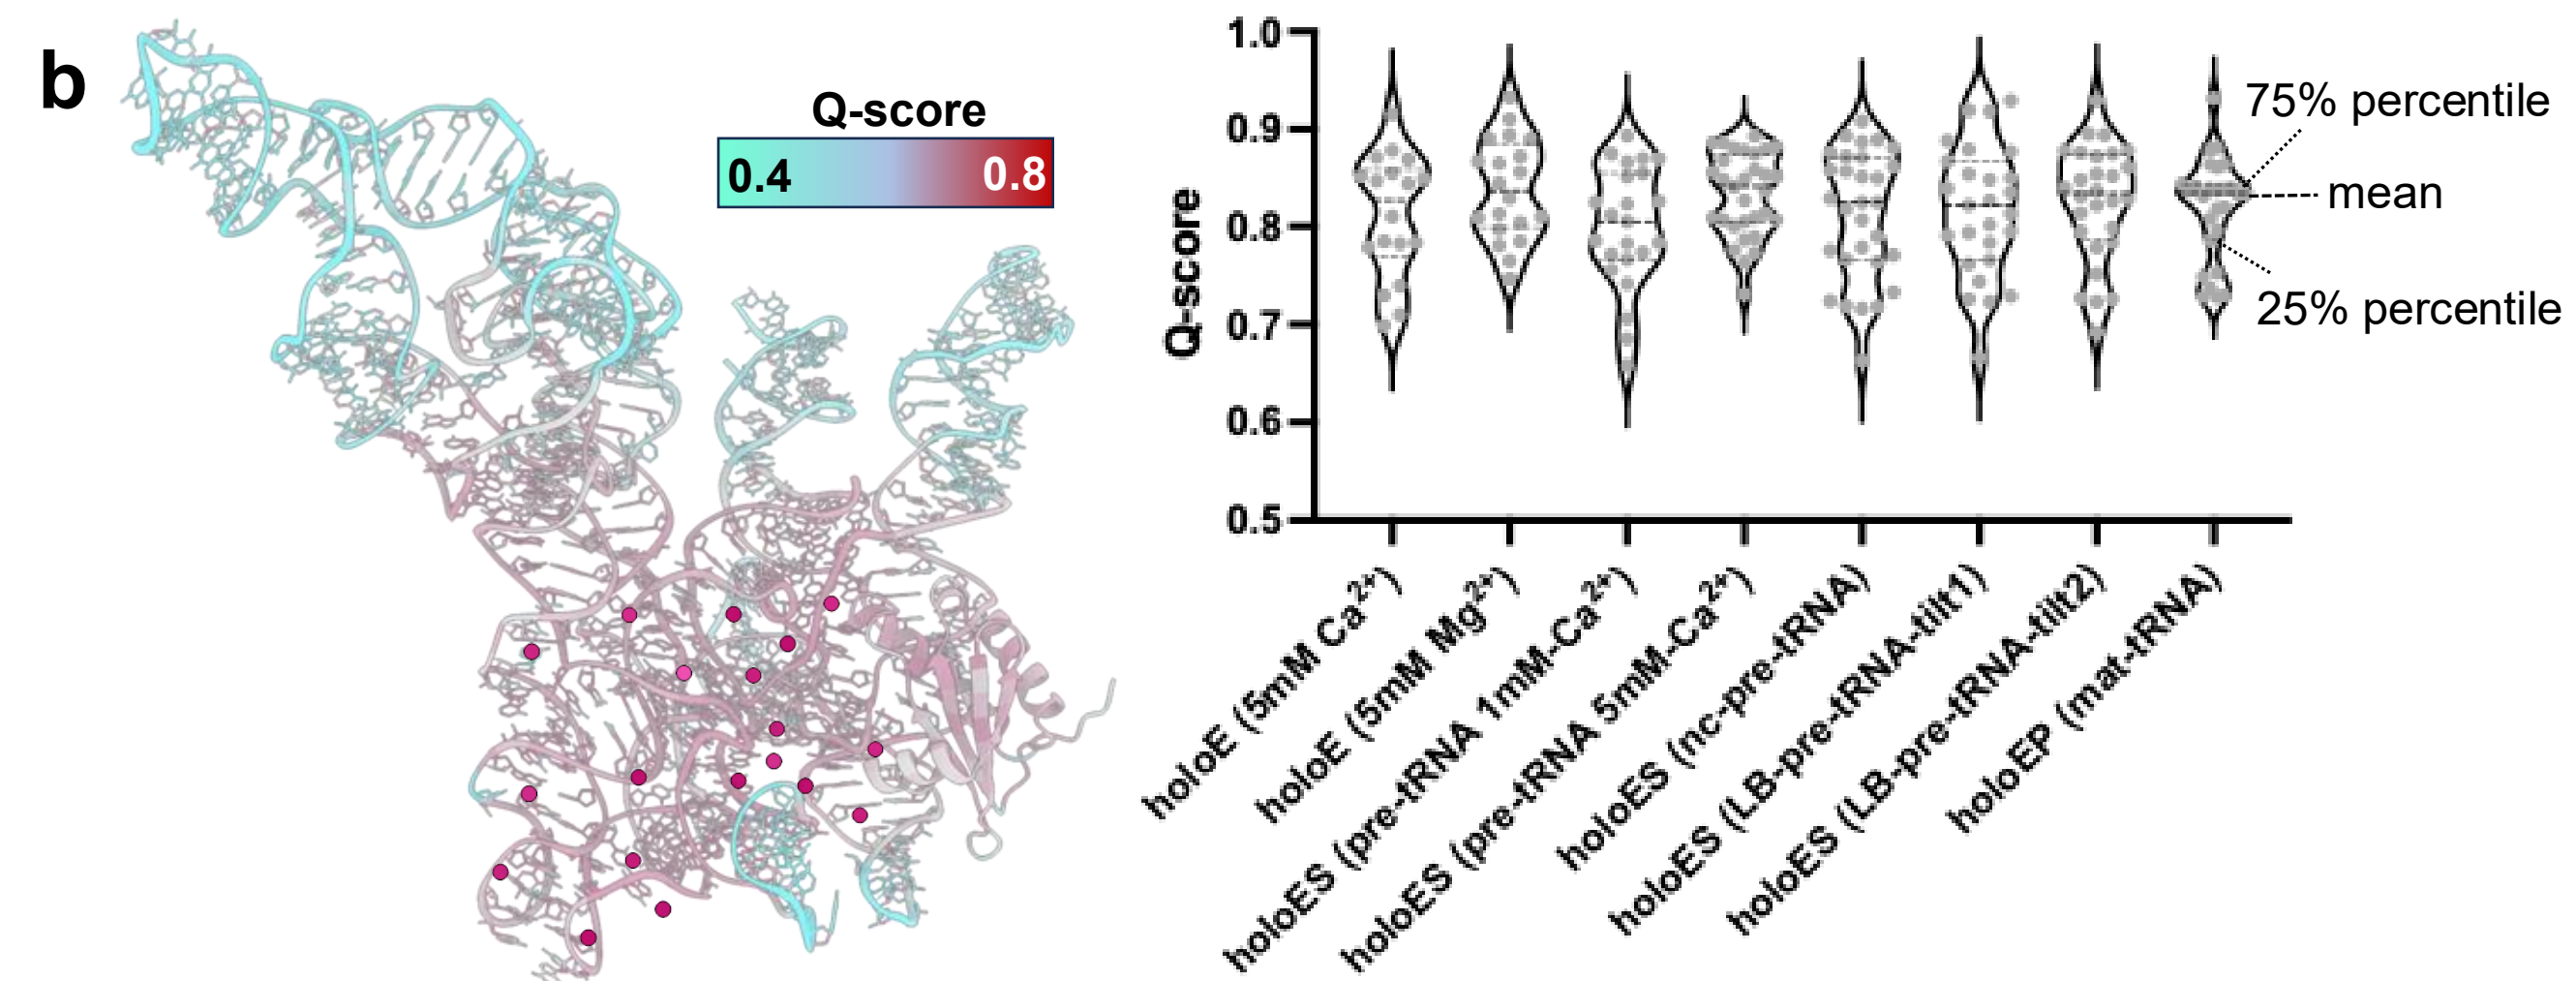

**Extended Data Fig. 2 | Divalent metal ion density maps and Q-scores in the cryo-EM structures. a,** Divalent metal ions of all the wild-type RNase P holoenzyme structures, and the ions are superimposed with their cryo-EM maps at a contour level threshold of 10 standard deviation ( $\sigma$ ). The RNase P protein component, rnpA binding site, is colored in orange. **b,** Q-score assessment and mapping of the metal ions on holoE structure. Statistics of Q-score distribution of all structures displayed in a Violin plot.

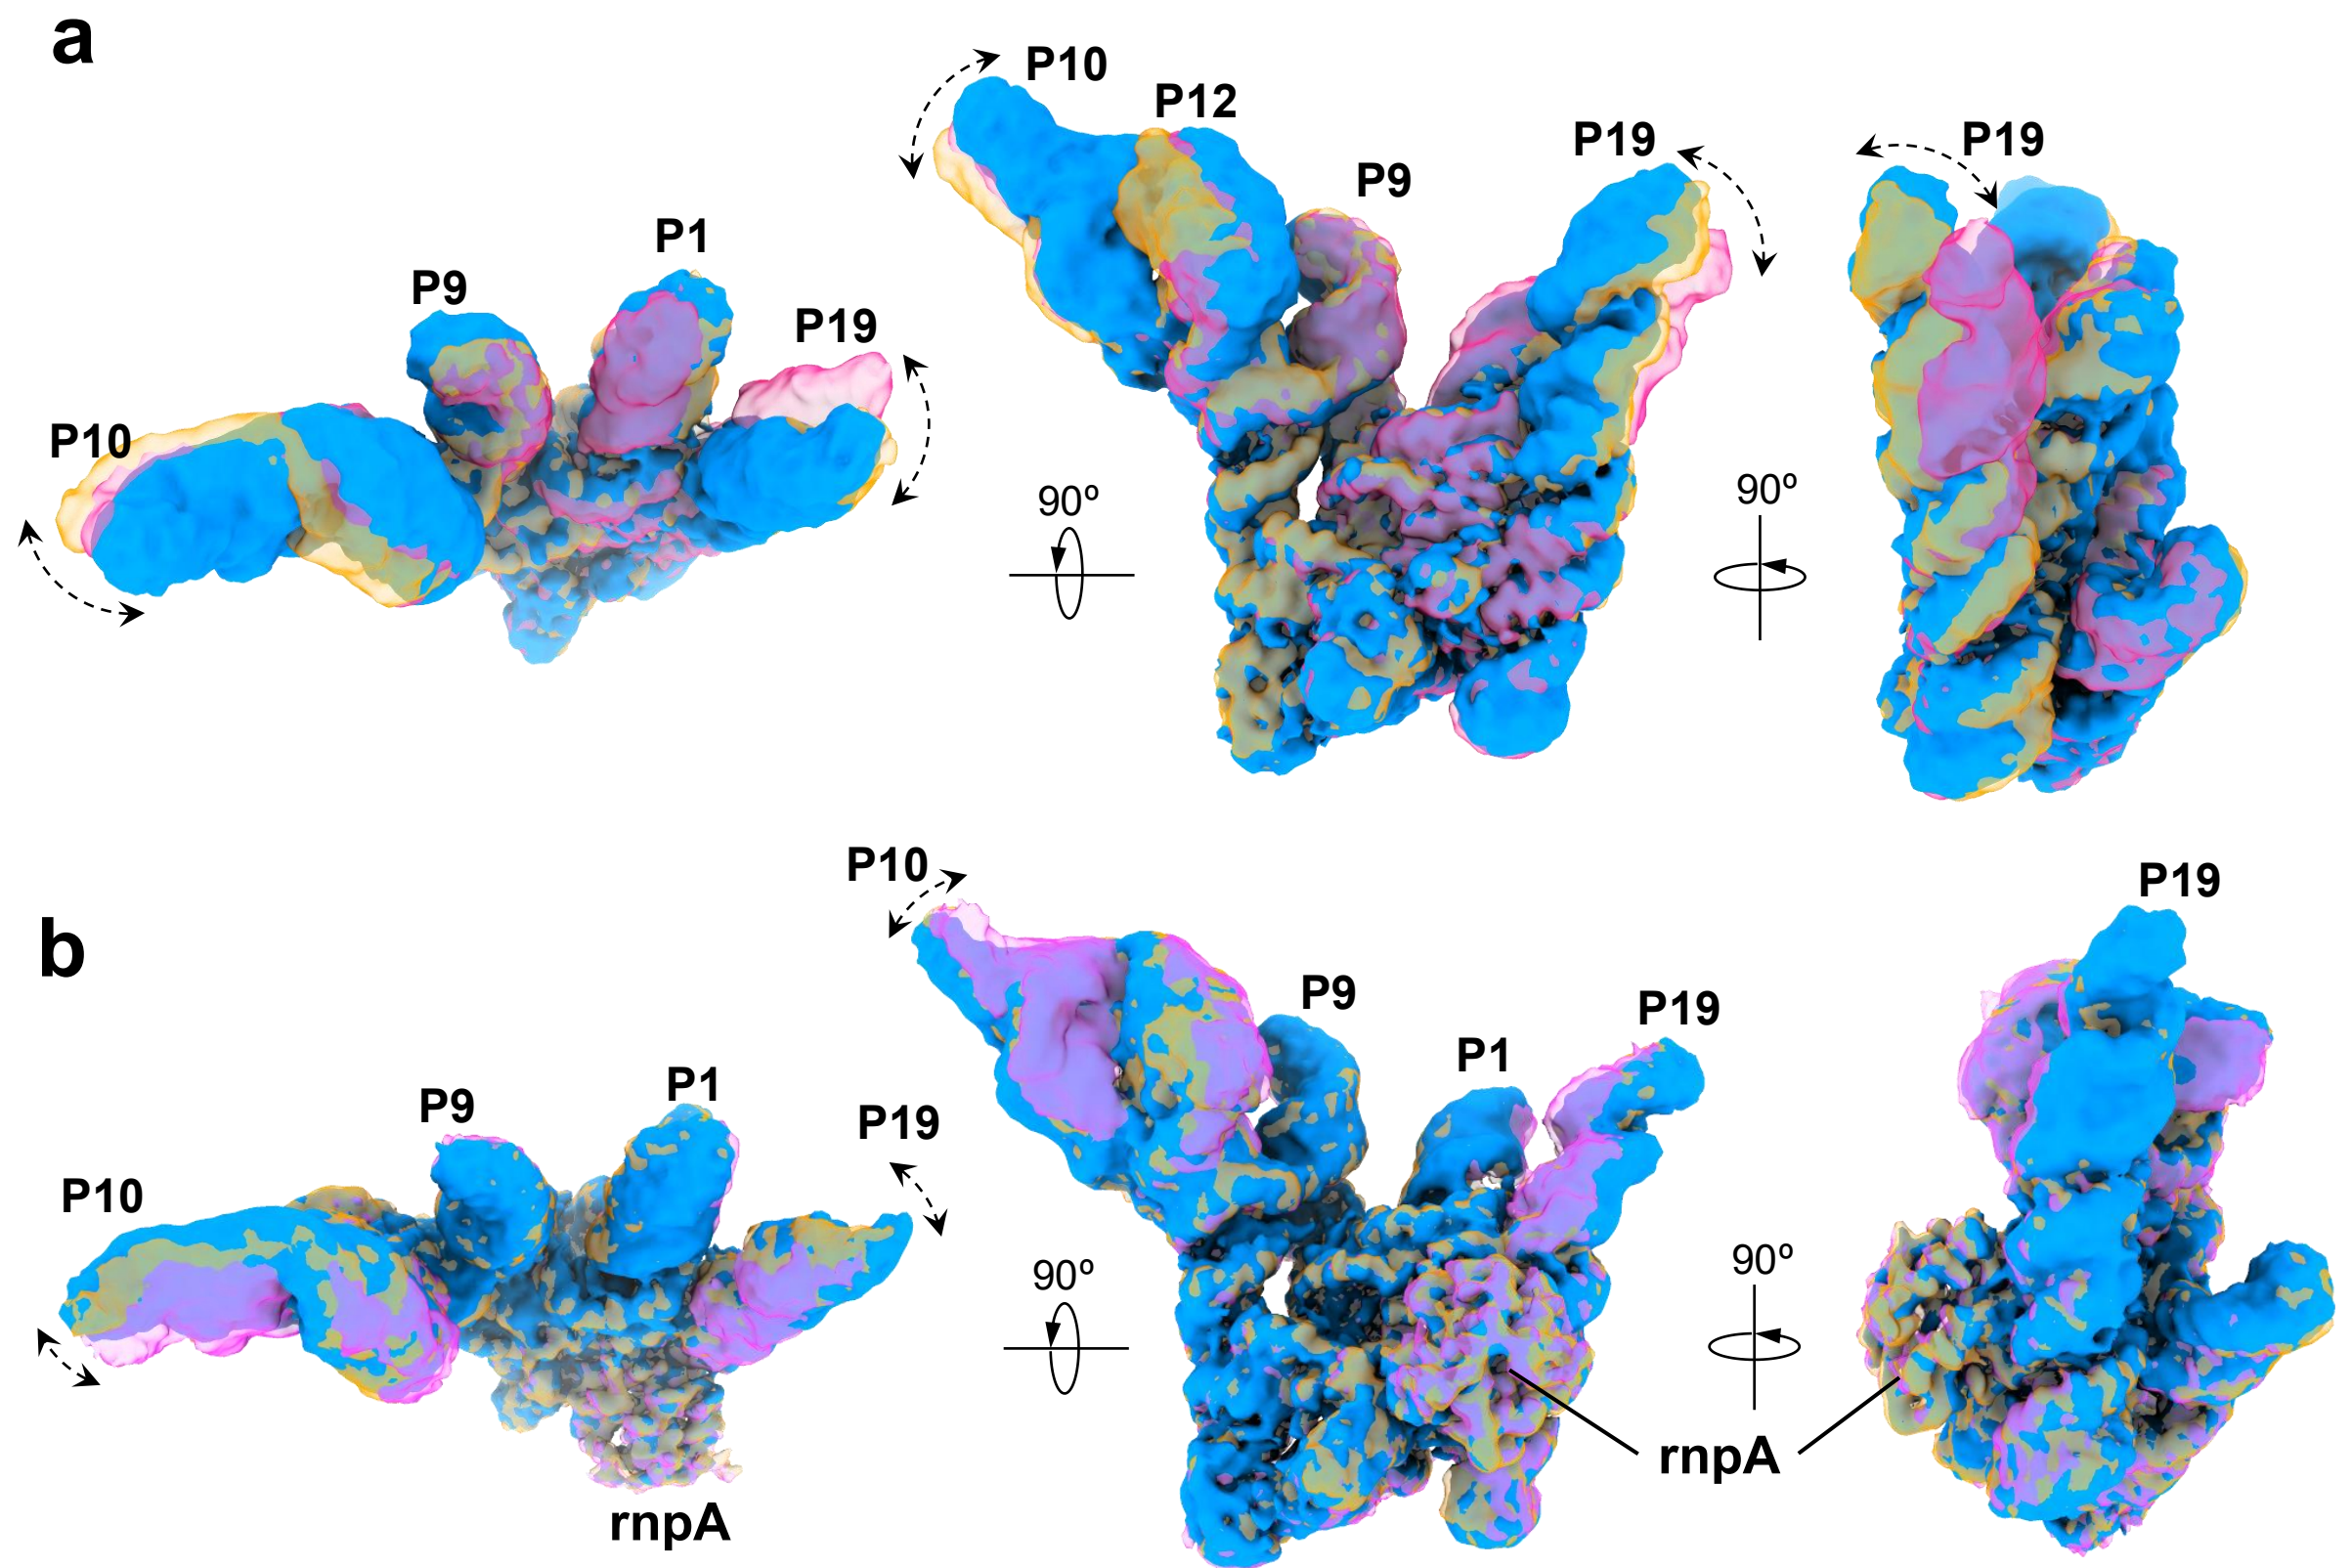

**Extended Data Fig. 3 | Structural variability of RNase P apoenzyme (apoE) and holoenzyme (holoE).** The three distinct conformations of the **a.**, apoE and **b.**, holoE, with different molecular surface colors, were subclassified and determined using three-dimensional classification in cryoSPARC (**Method**). The two conformations of apoE and holoE (magenta and orange), aligned against the structure, generated from the majority of particles (blue).

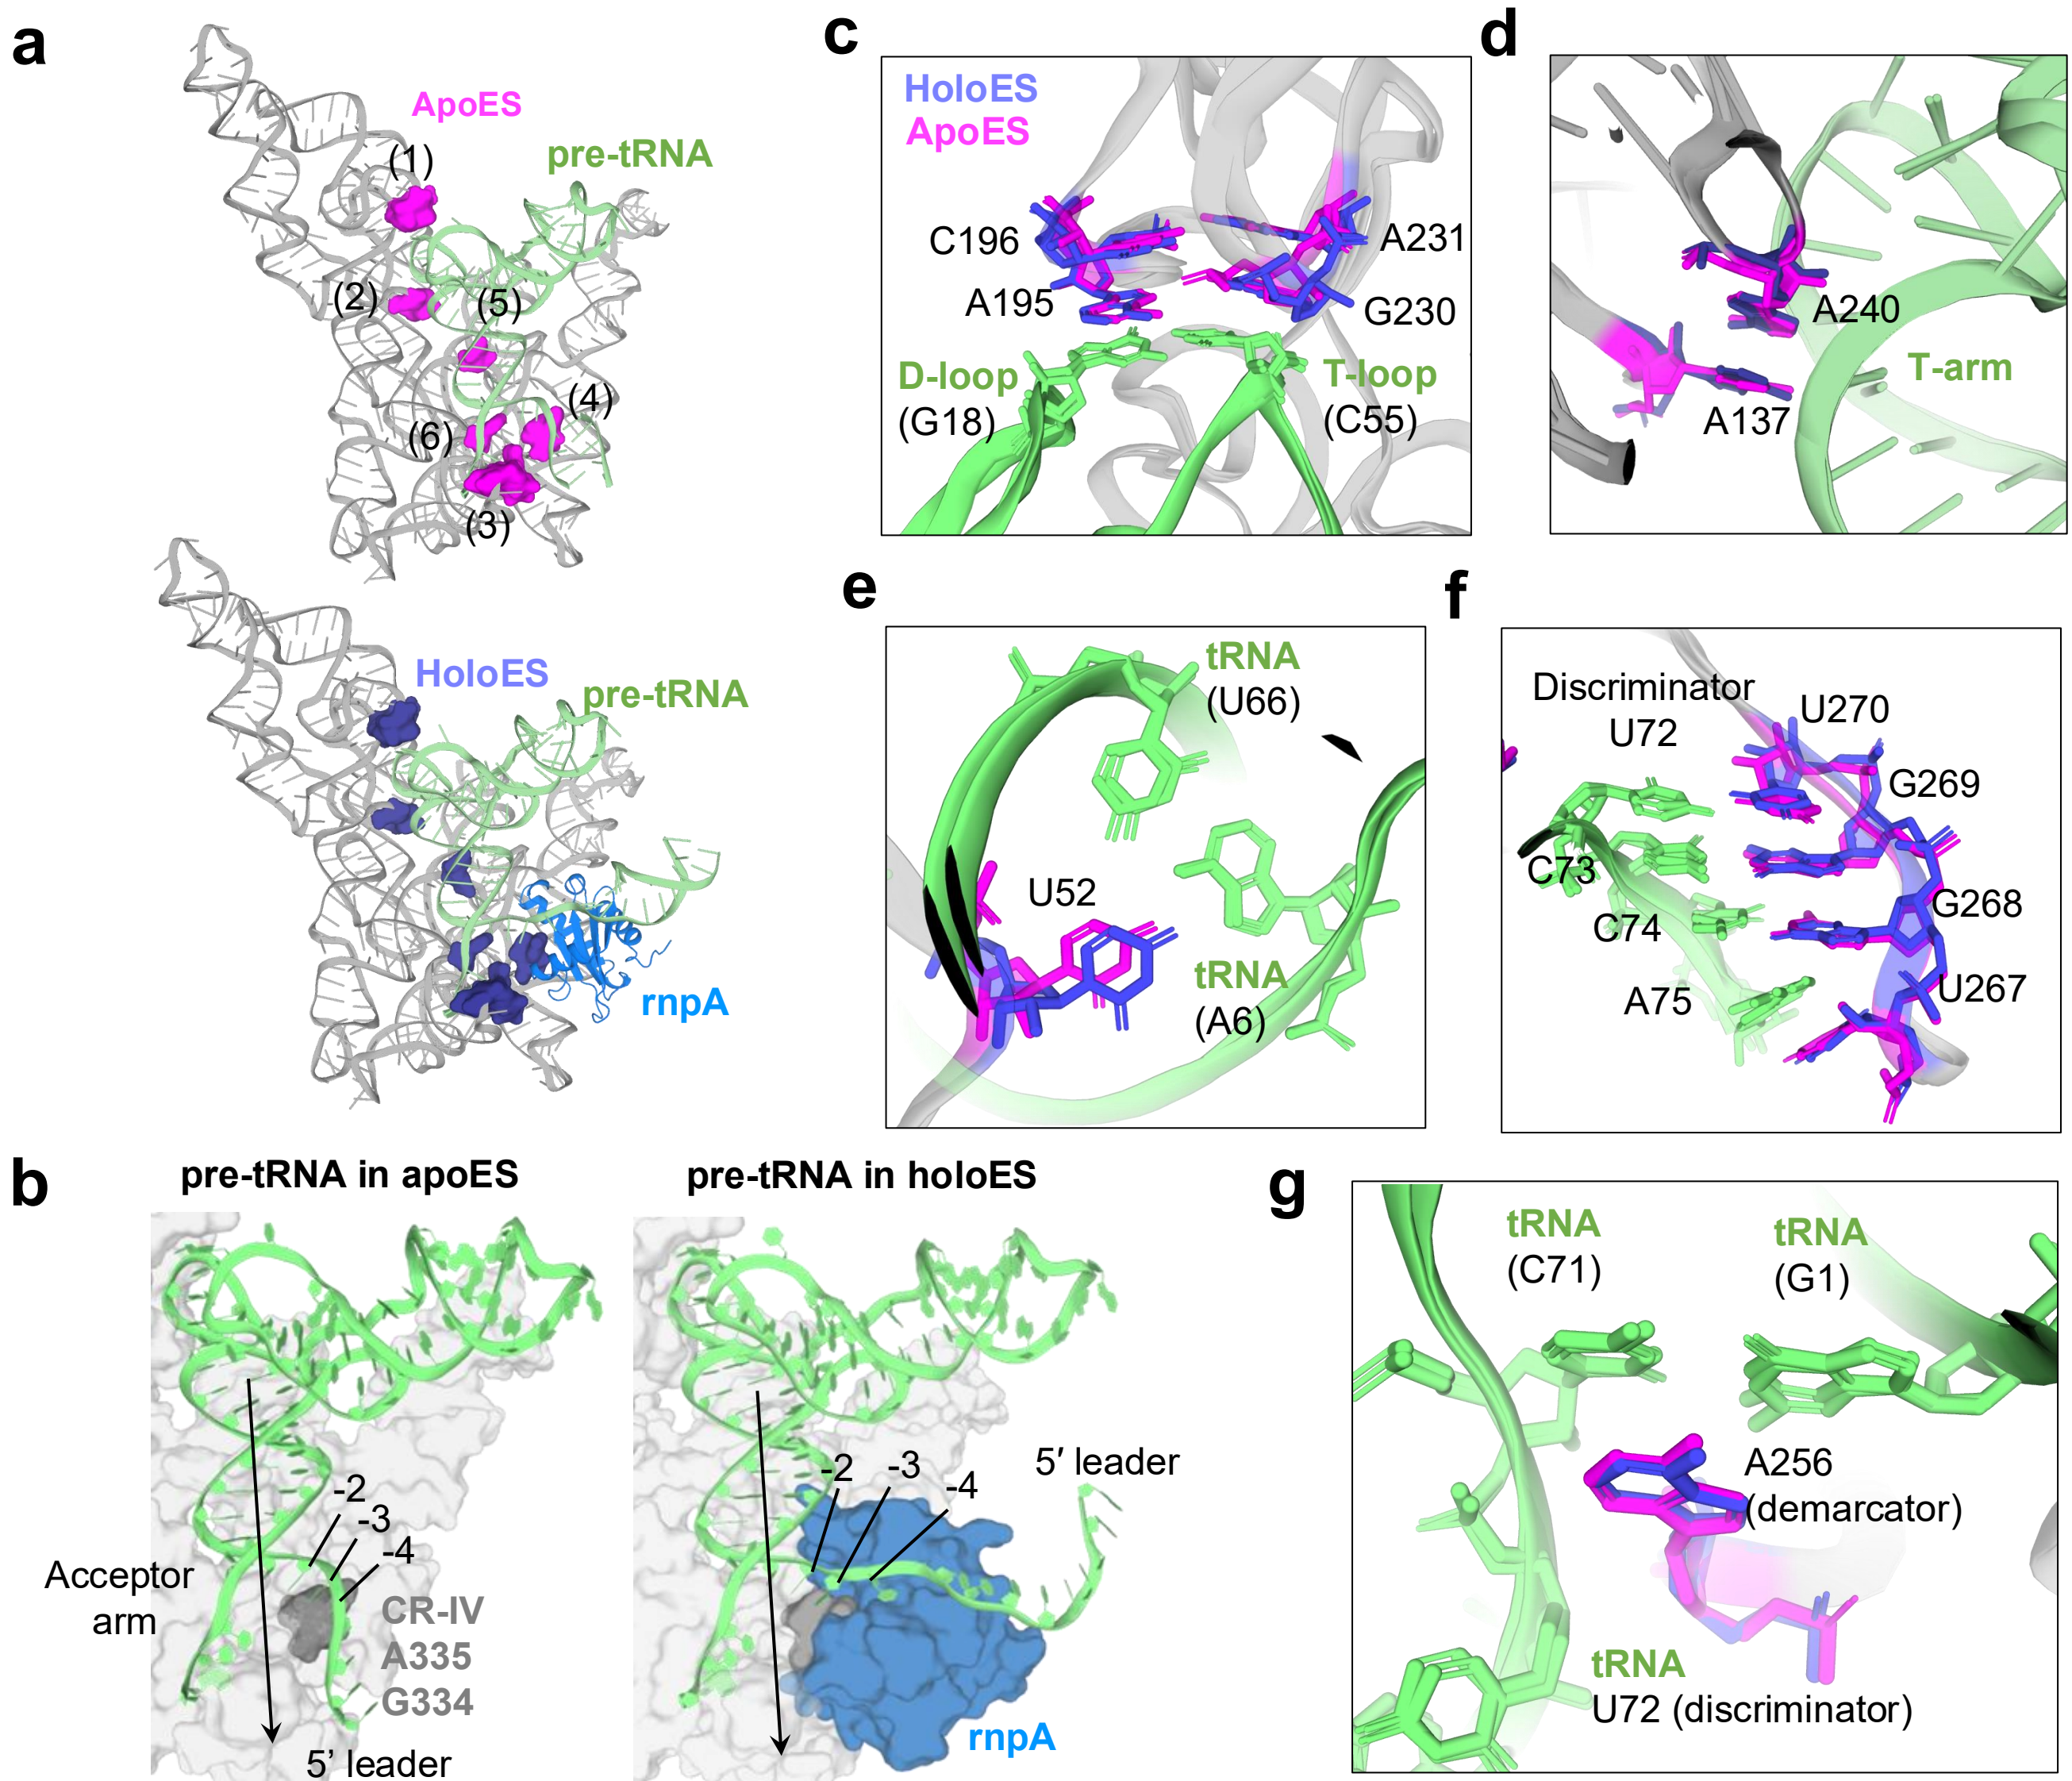

**Extended Data Fig. 4 | Local structural comparison of the six toeholds for pre-tRNA recognition between RNase P apo and holoenzymes. a**, Structures of apoES (top) and holoES (bottom) with the five toeholds shown with the molecular surface, colored with magenta and blue, respectively. **b**, 5' leader interactions in apoES and holoES. **c**, Base stacking interaction between RNase P RNA (RPR) IDTM and tRNA elbow region. **d**, RPR bulge interactions (A137 and A240) with the minor groove of the T arm of pre-tRNA. **e**, RPR U52 forms a base triplet with an AU base pair in the tRNA acceptor arm. **f**, RPR L15 interaction with the 3'-CCA trailer of pre-tRNA. **g**, The discriminator and demarcator nucleobases of pre-tRNA and RPR, respectively.



**a**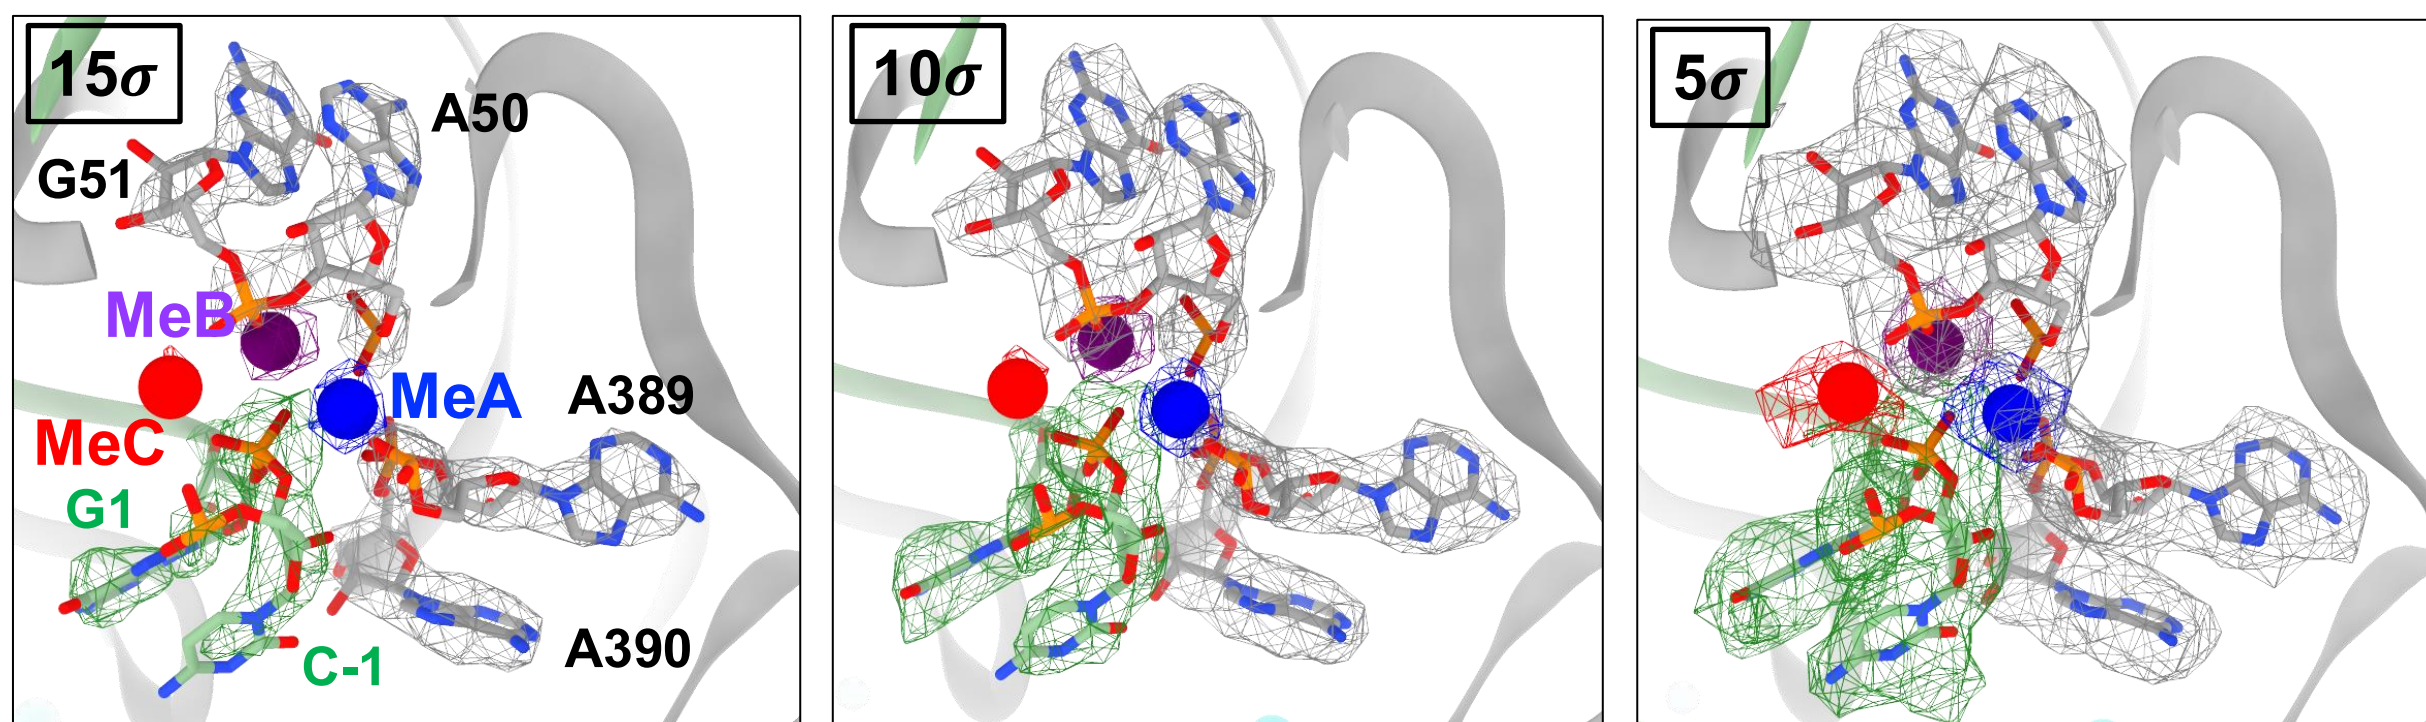**b**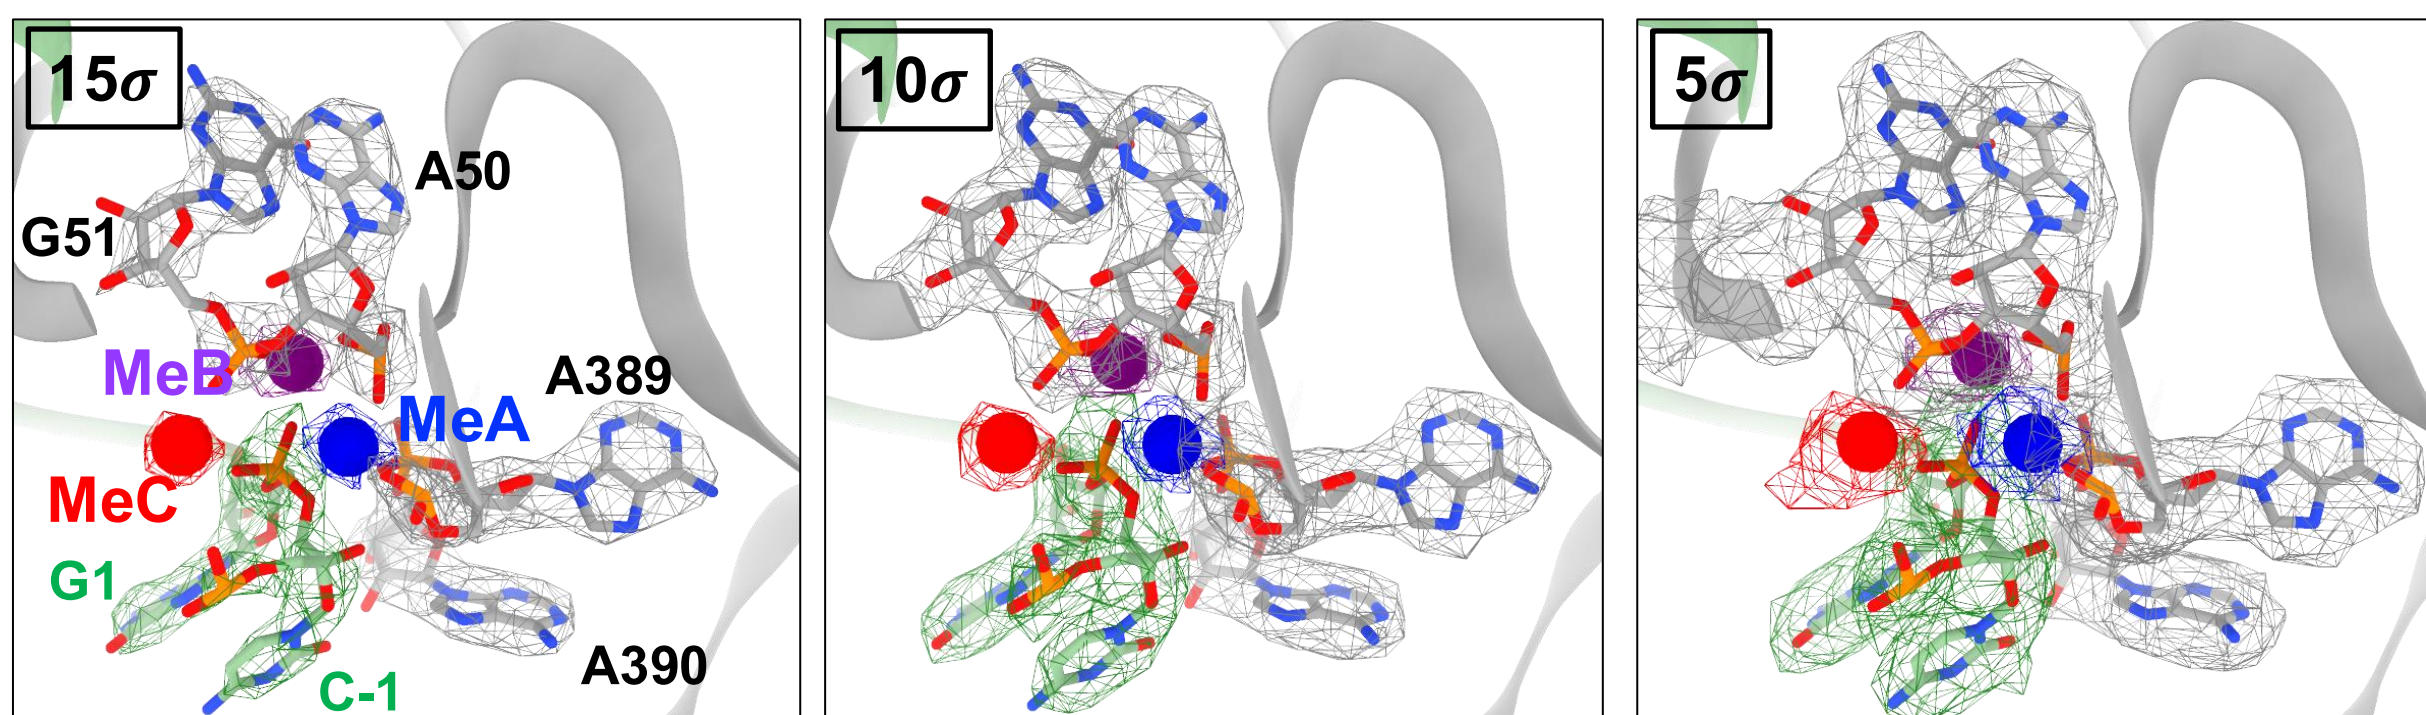

**Extended Data Fig. 6 | The catalytic metal ions in RNase P holoES complexes determined at 1 and 5 mM Ca<sup>2+</sup>.** Structures of the catalytic nucleotides and the three divalent metal ions (MeA-C), superimposed with cryo-EM maps with a decreasing contour level threshold (from left to right) that were determined **a**, at a physiologically relevant concentration of 1 mM Ca<sup>2+</sup> and **b**, at an elevated concentration of 5 mM Ca<sup>2+</sup>.

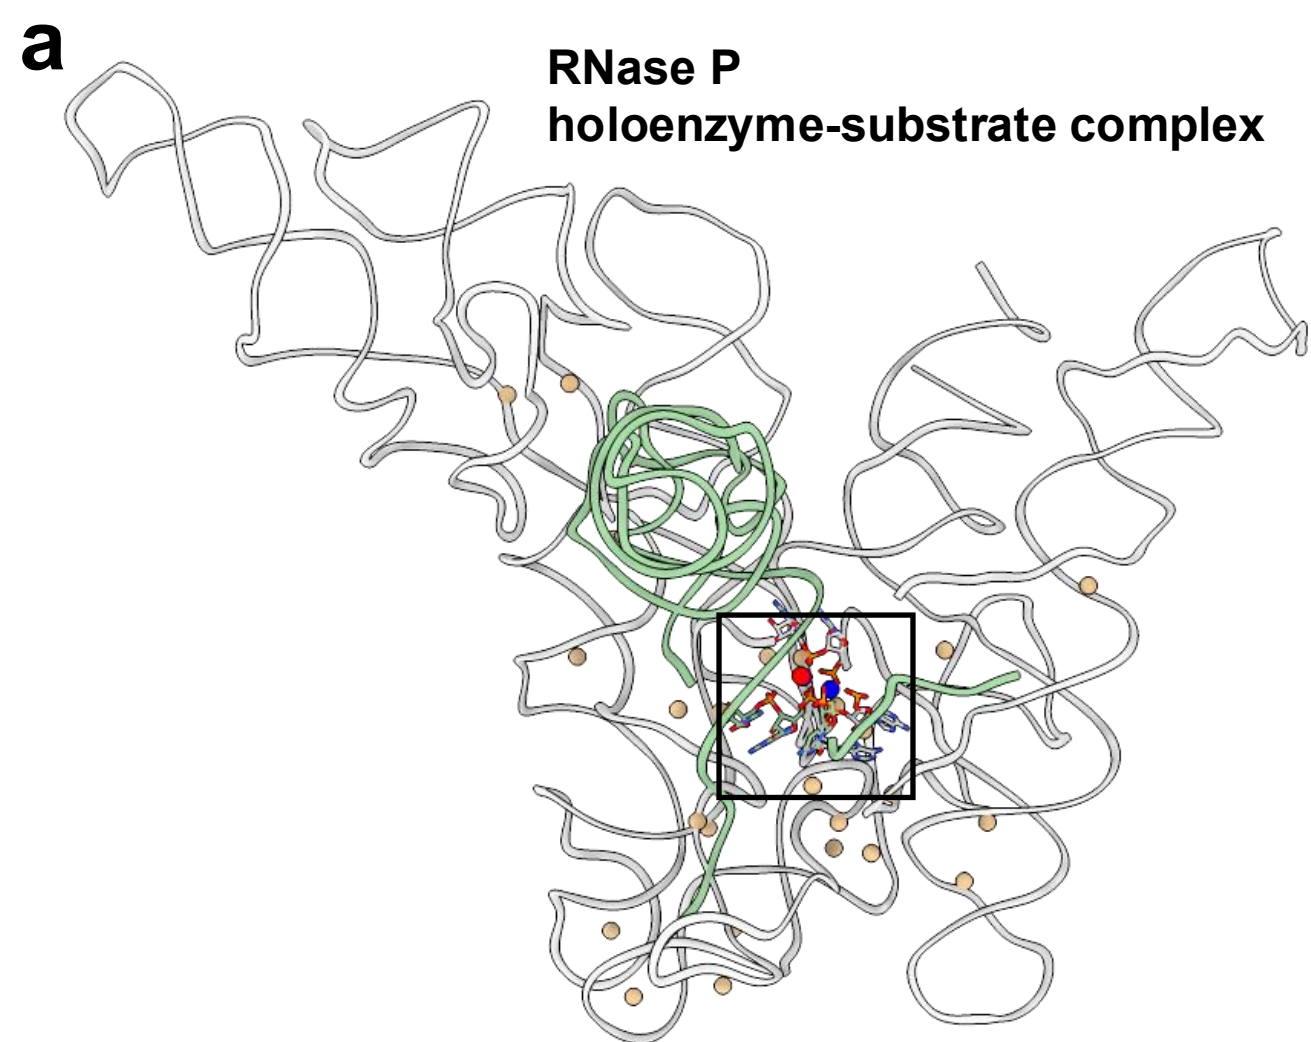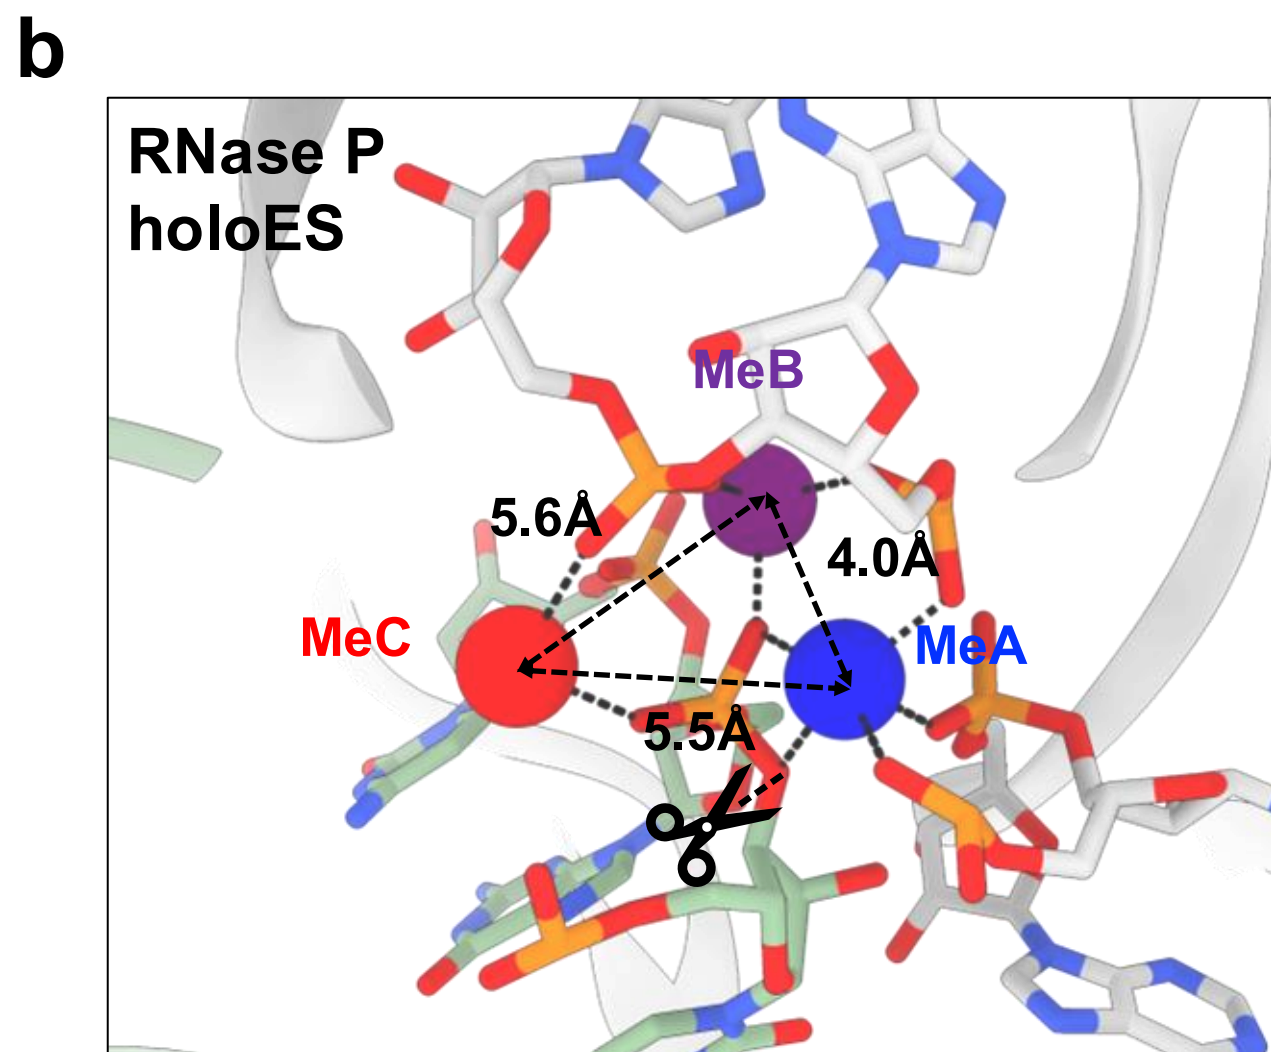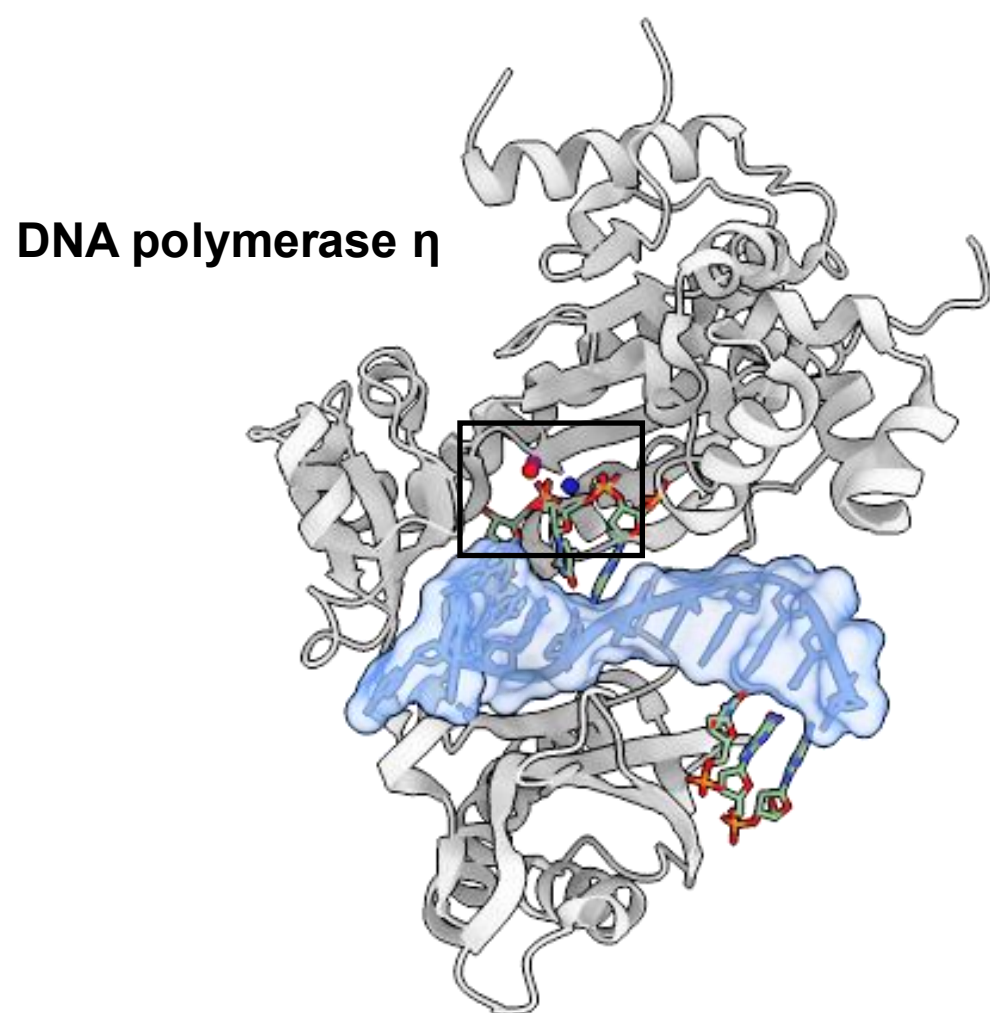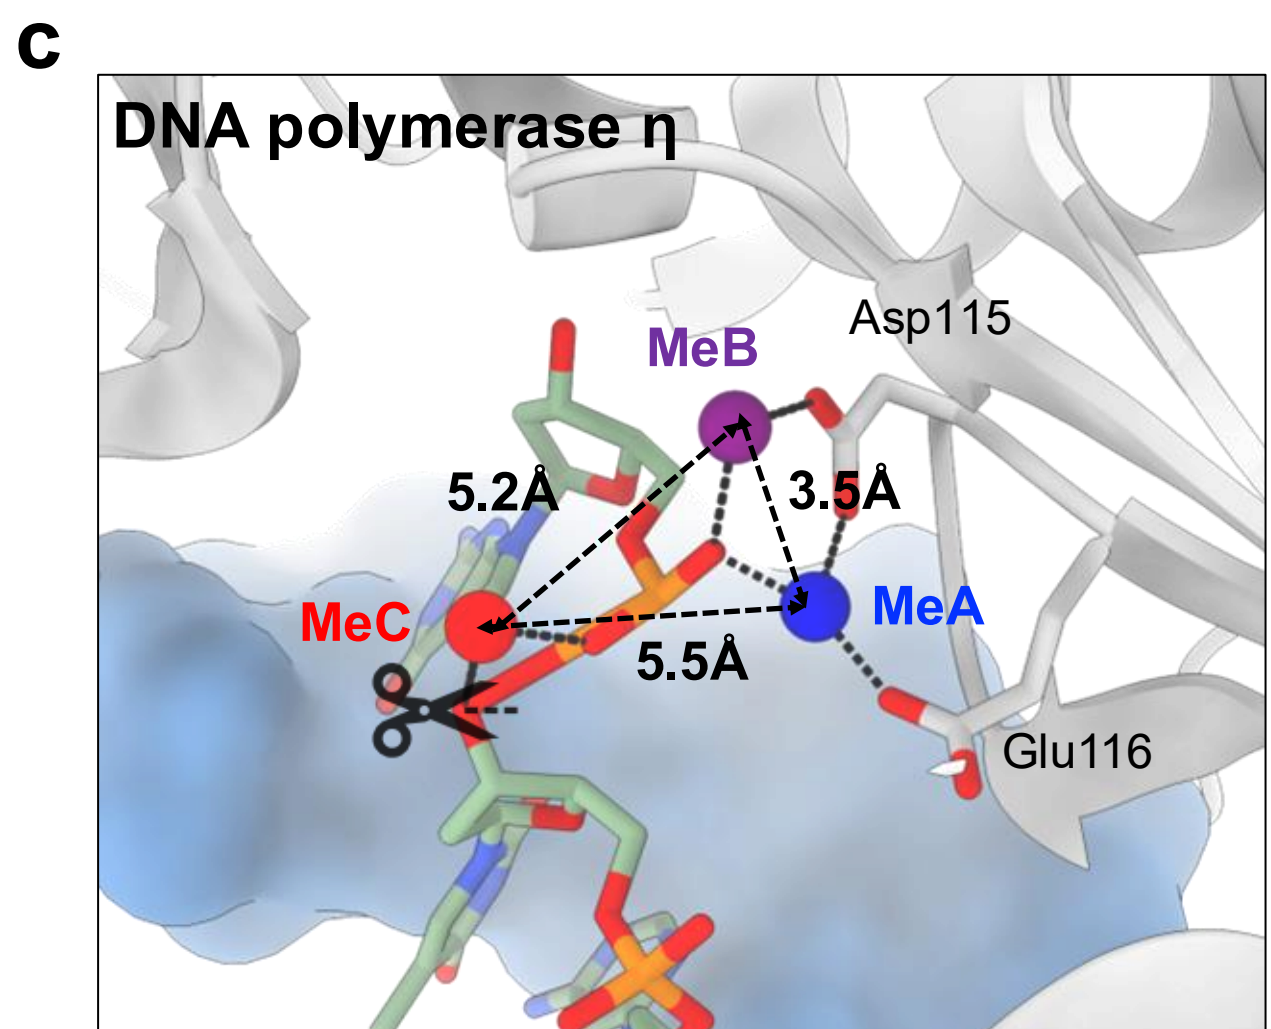

**Extended Data Fig. 7 | Catalytic metal ion triad in RNase P holoenzyme and human DNA polymerase  $\eta$  | a**, Structures of RNase P holoenzyme-pre-tRNA substrate complex (PDB: 9OWT in this study) and human DNA polymerase  $\eta$  in complex with double-stranded DNA (PDB: 7U79). The catalytic metal ion triad in **b**, RNase P-substrate complex and **c**, human DNA polymerase are highlighted and zoomed out on the right two panels.

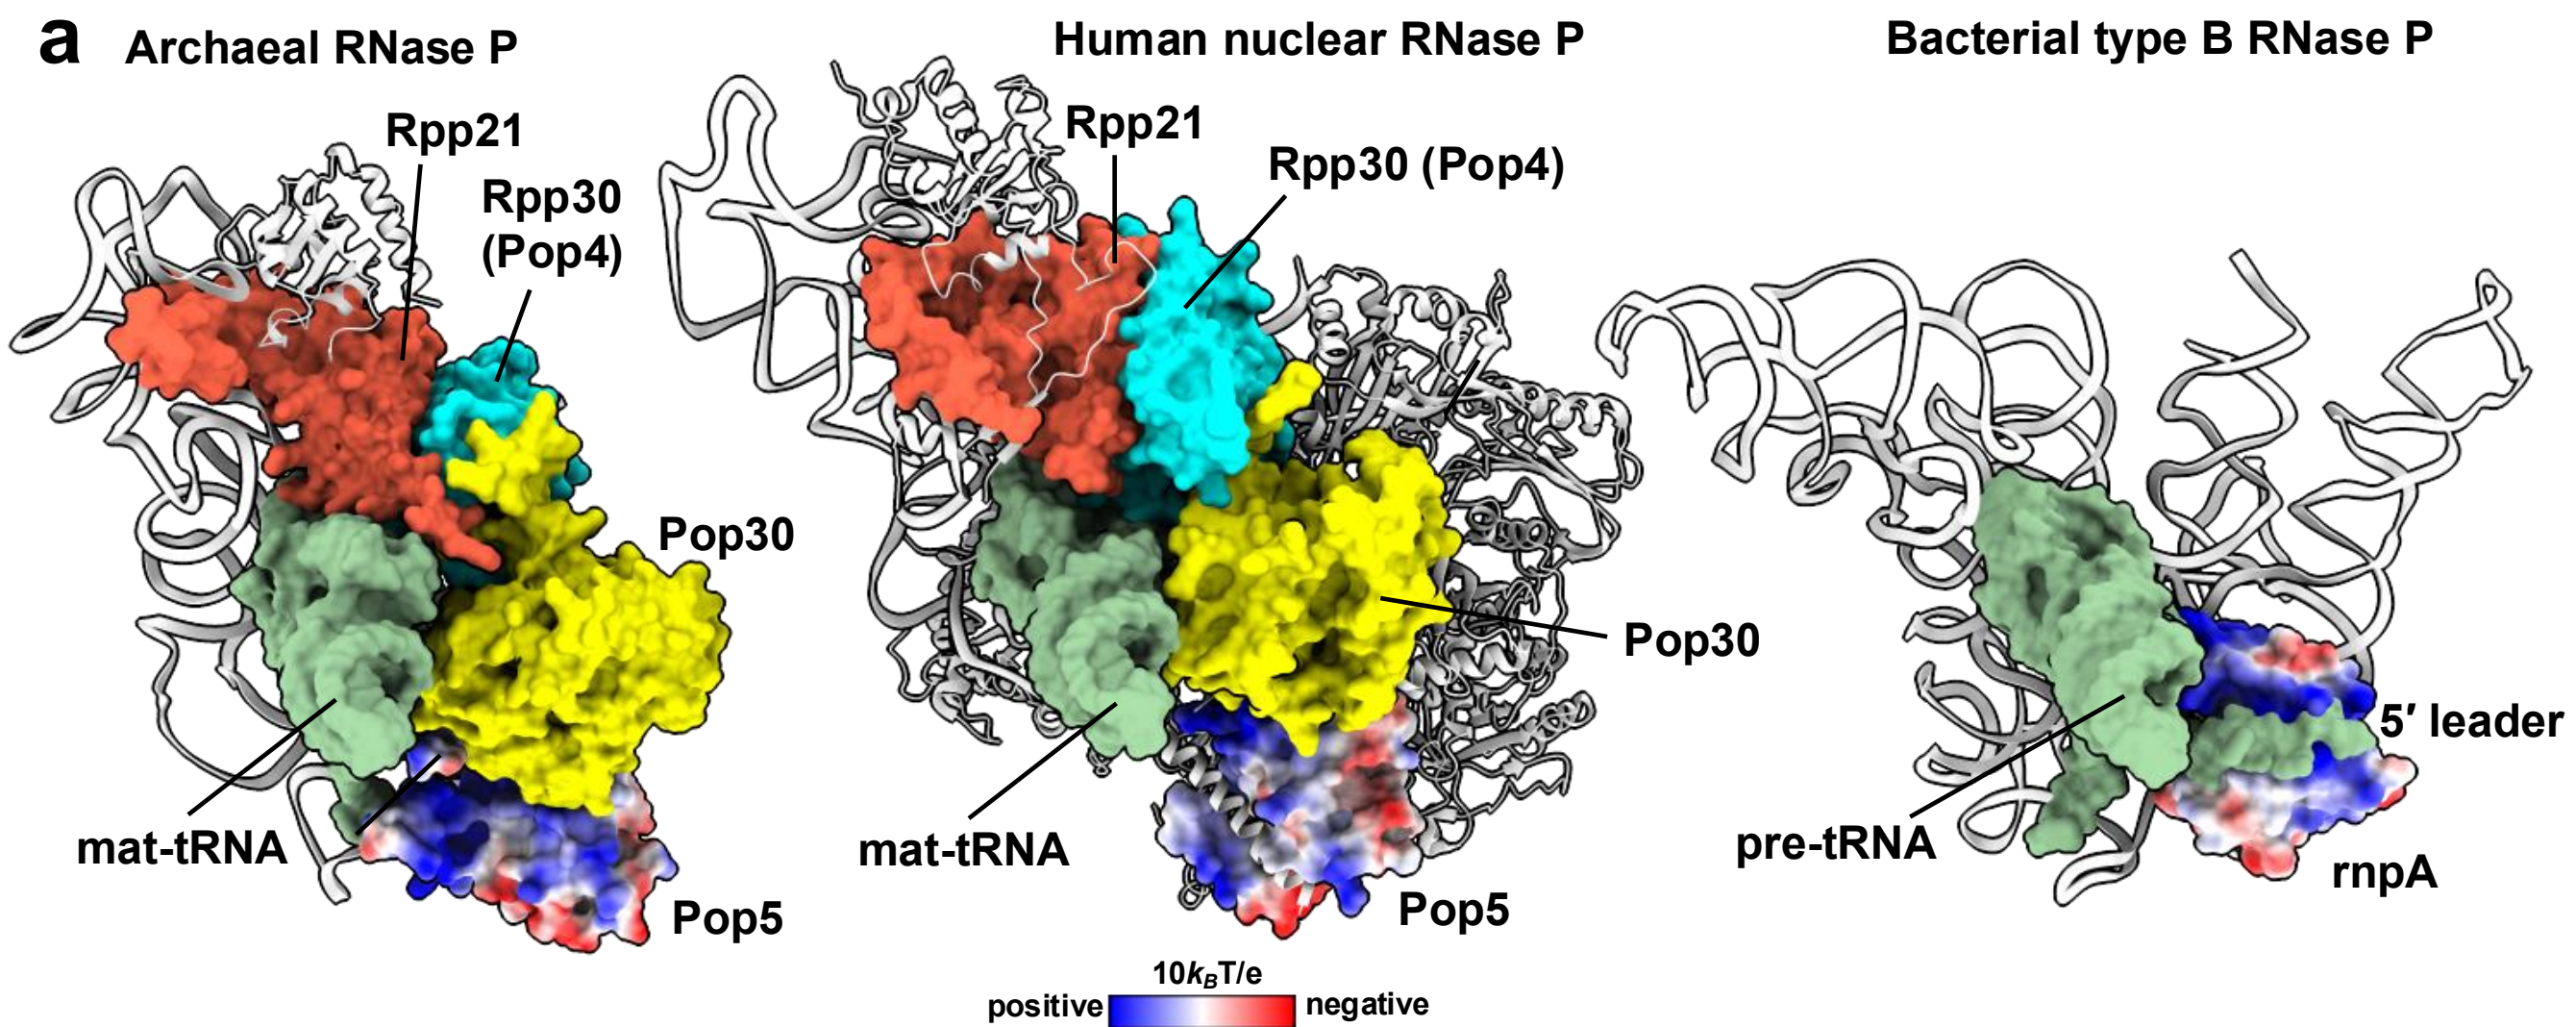

**b**

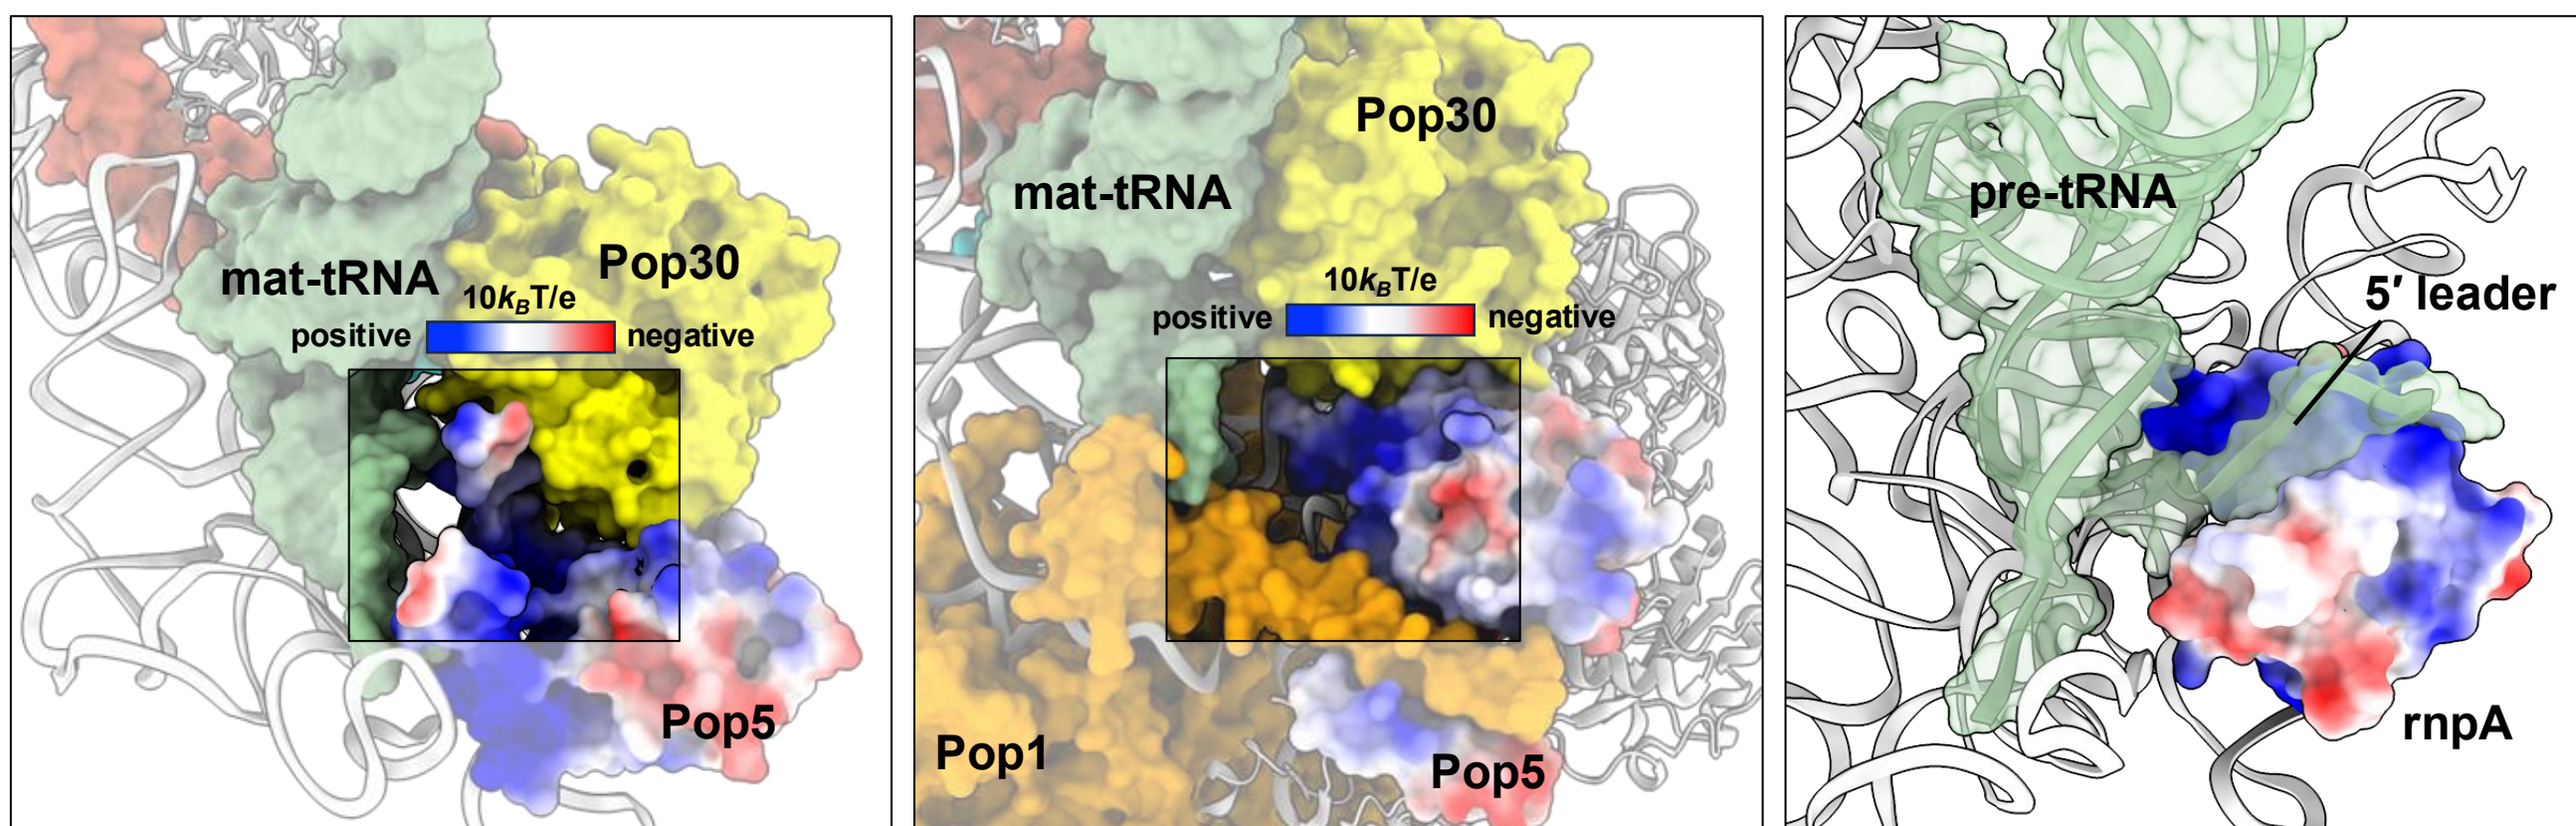

**Extended Data Fig. 8 | Comparative structural analysis for archaeal, human nuclear and bacterial RNase Ps.** **a**, RNase P structures of archaeal, human nuclear and bacterial RNase Ps (PDBs: 6K0B, 6AHU, 9OWT from left to right). The protein components of the archaeal, human nuclear RNase Ps showed in molecular surface with distinct colors. **b**, The protein component Pop5 in archaeal RNase P (left), human nuclear RNase P (middle) and rnpA of bacterial RNase P (far-right) are coloring with a color-ramp surface by the values of the electrostatic potential.
