# Supplementary material for: Three-metal-ion catalysis by ribonuclease P holoenzyme: a new mechanistic insight into transfer RNA maturation
Source: Research Square preprint supplement (doi:10.21203/rs.3.rs-9187222/v1), 2026-05-14
Supplement: Supplementary file 2 [file 6544c78591dacb218cdcf8ab.pdf]

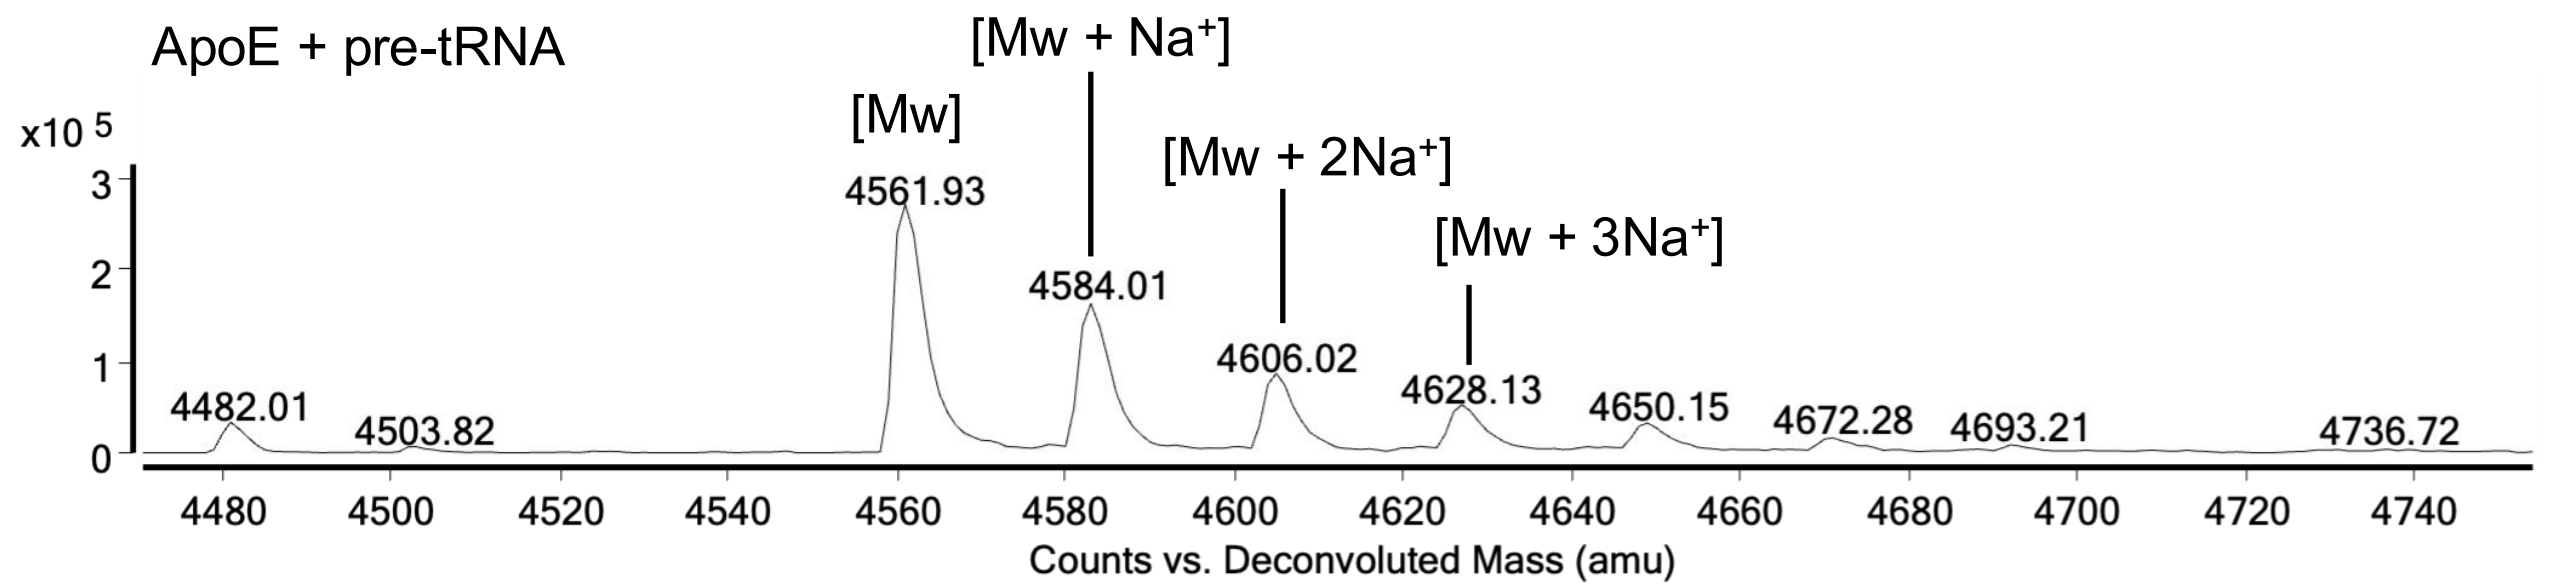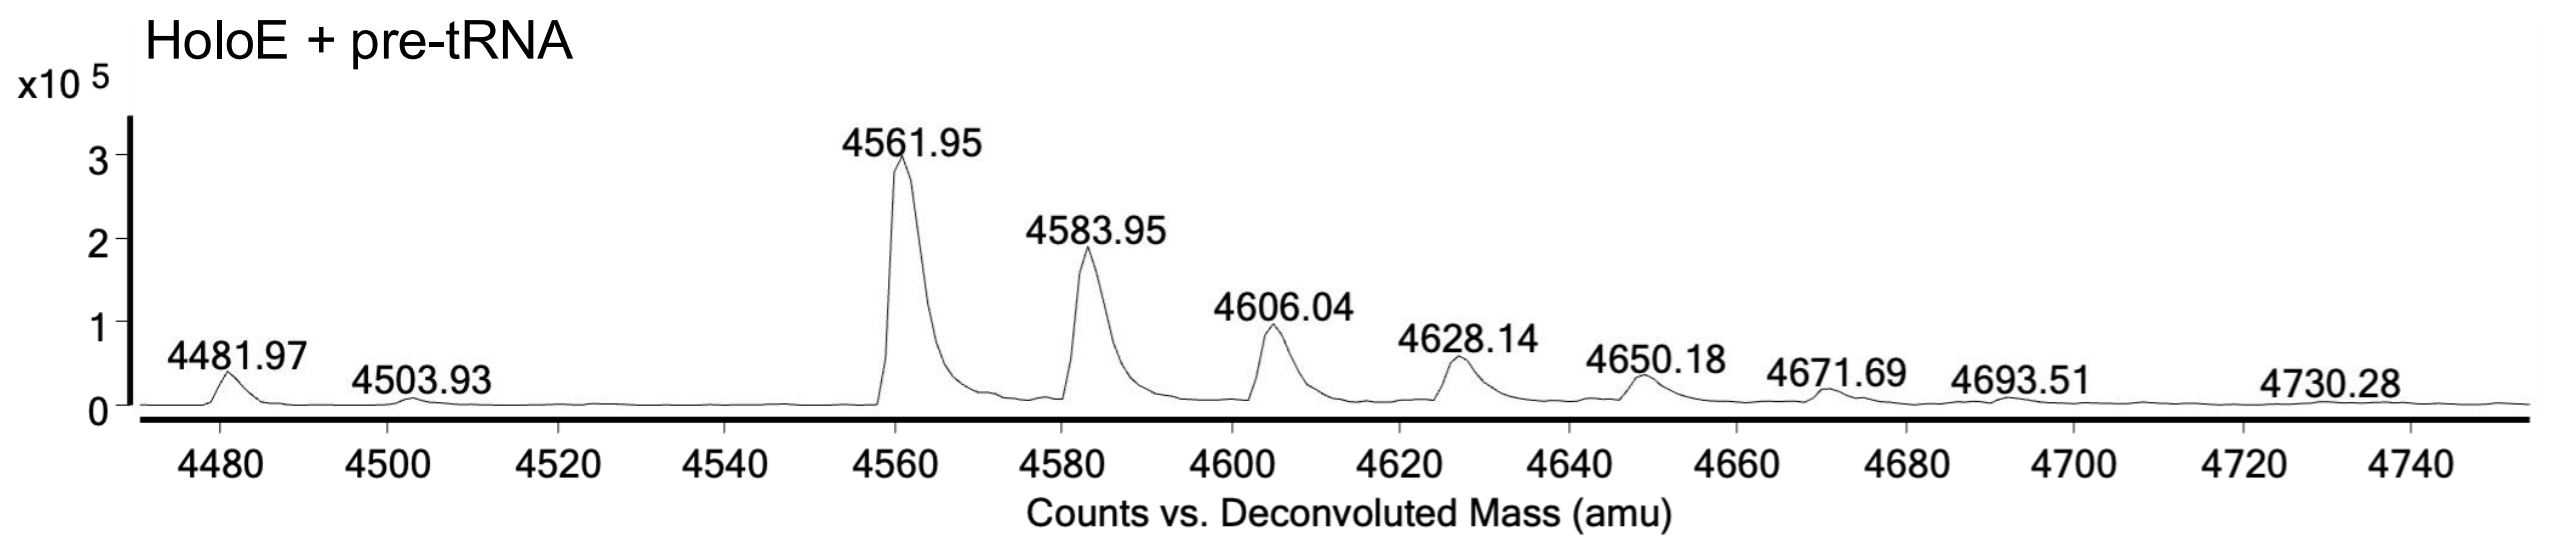

**Supplementary Fig. 1 | Mass spectrometry assessment to confirm the molecular mass of the 5'-leader product of pre-tRNA, produced by RNase P apo and holoenzyme. Ionization states and deconvoluted molecular mass distributions of the 5' cleavage product of pre-tRNA by apoE (top) and holoE (bottom).**

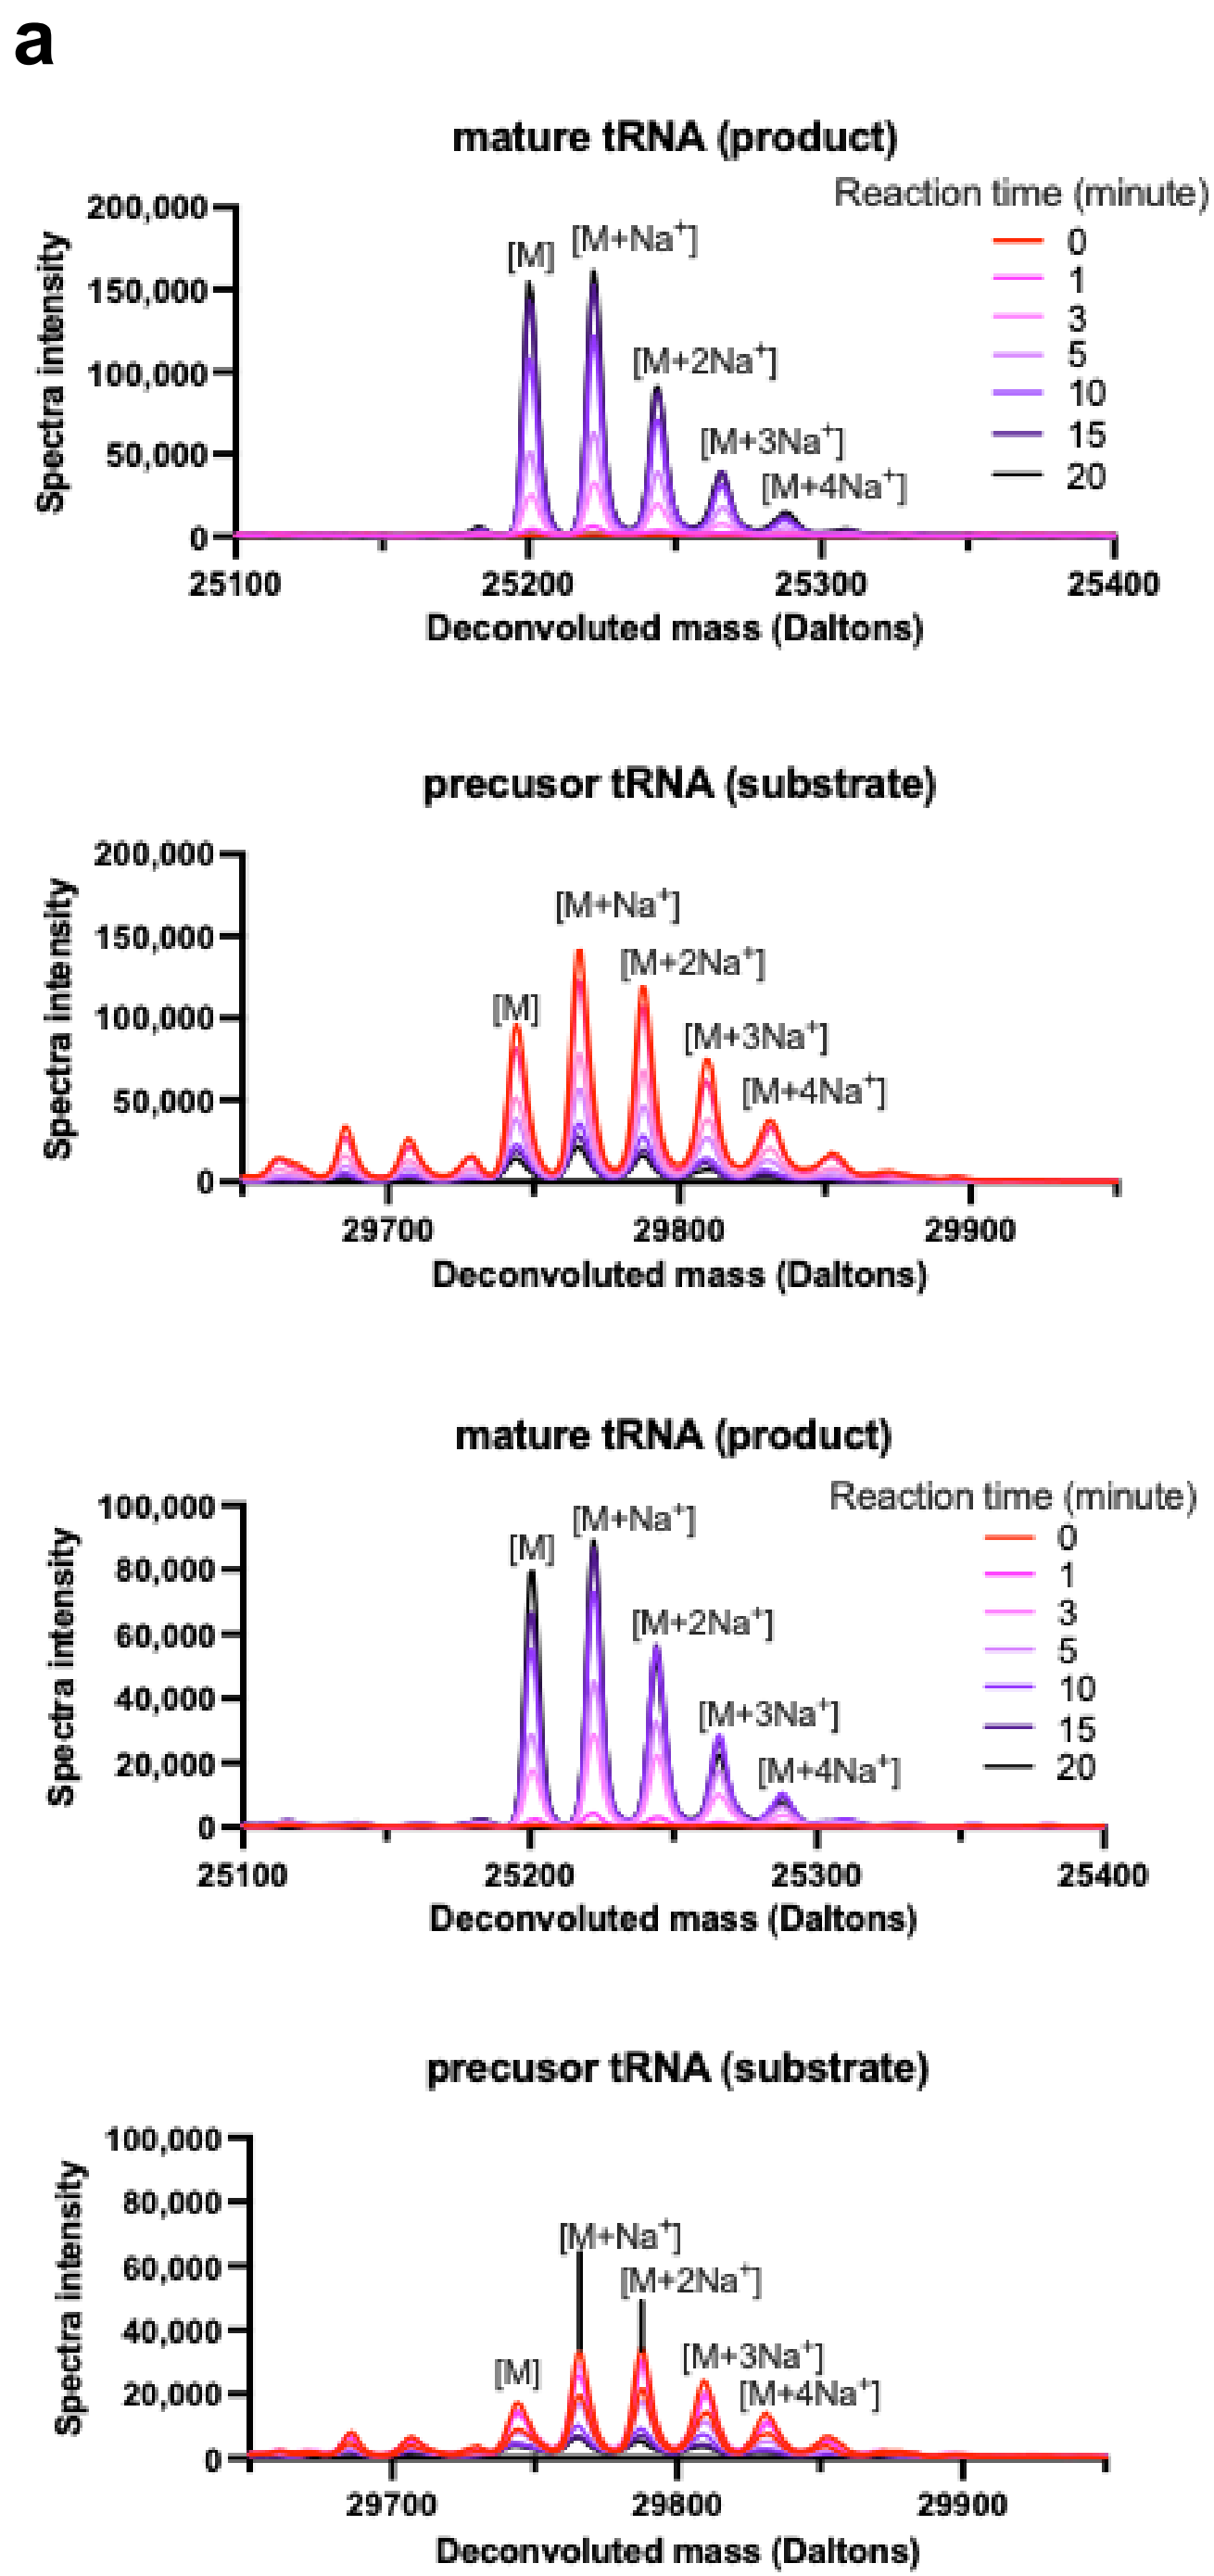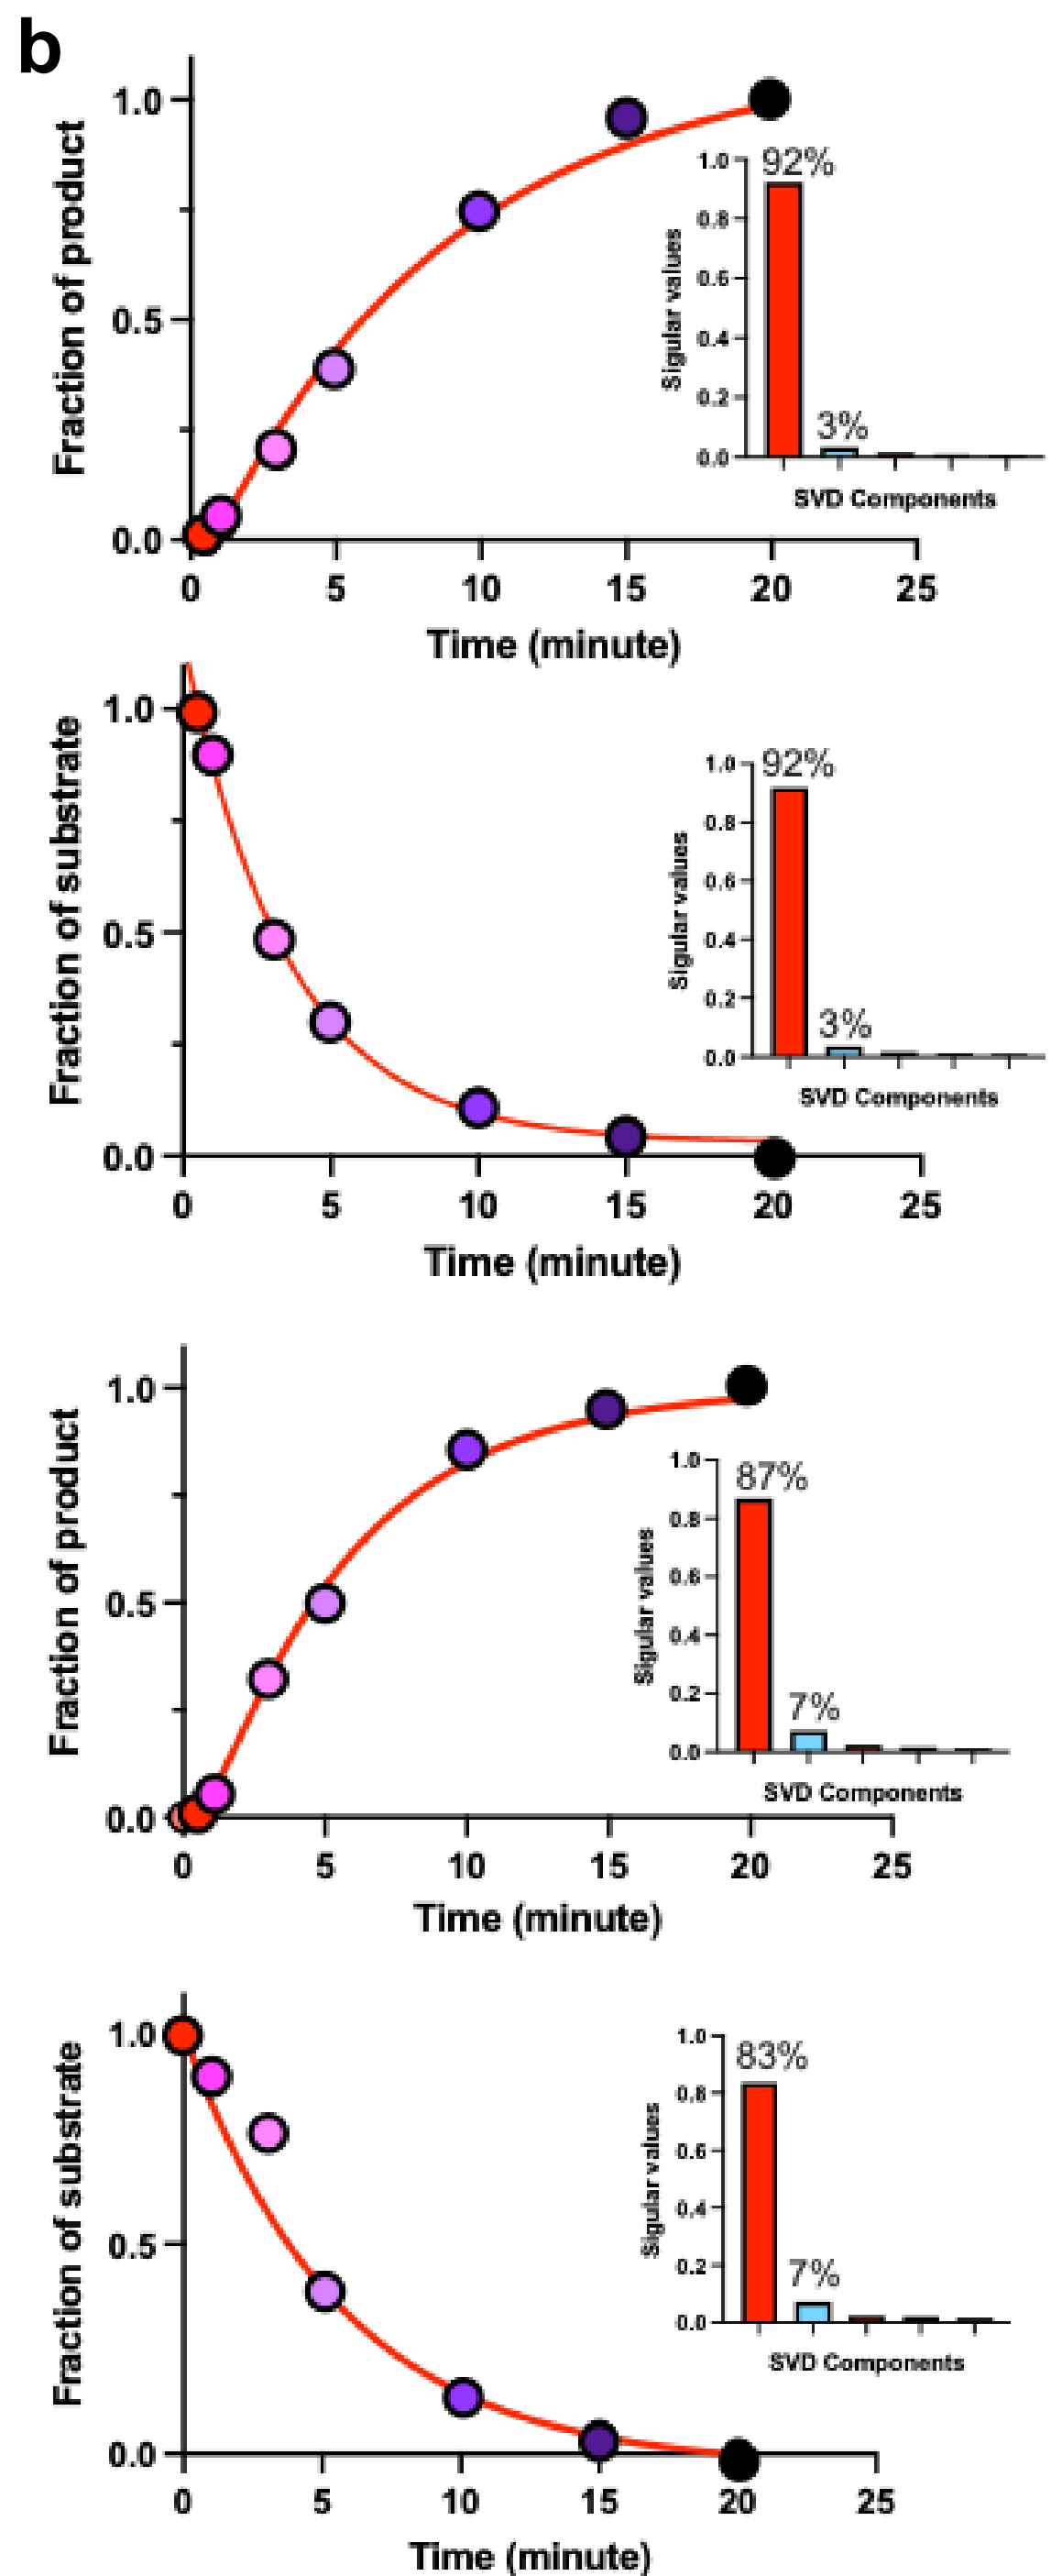

**Supplementary Fig. 2 | Time-course experiments of precursor tRNA hydrolysis by RNase P holoE through quantitative mass-based analysis.** **a**, Time-dependent mass distributions of product formation (mature tRNA) and depletion of substrate (pre-tRNA) from experimental duplicate,  $n=2$ . **b**, Fraction of product (top) and substrate (bottom) as a function of time derived from singular value decomposition (SVD) analysis of the time-course mass signals fit by the kinetic model (**Methods**).

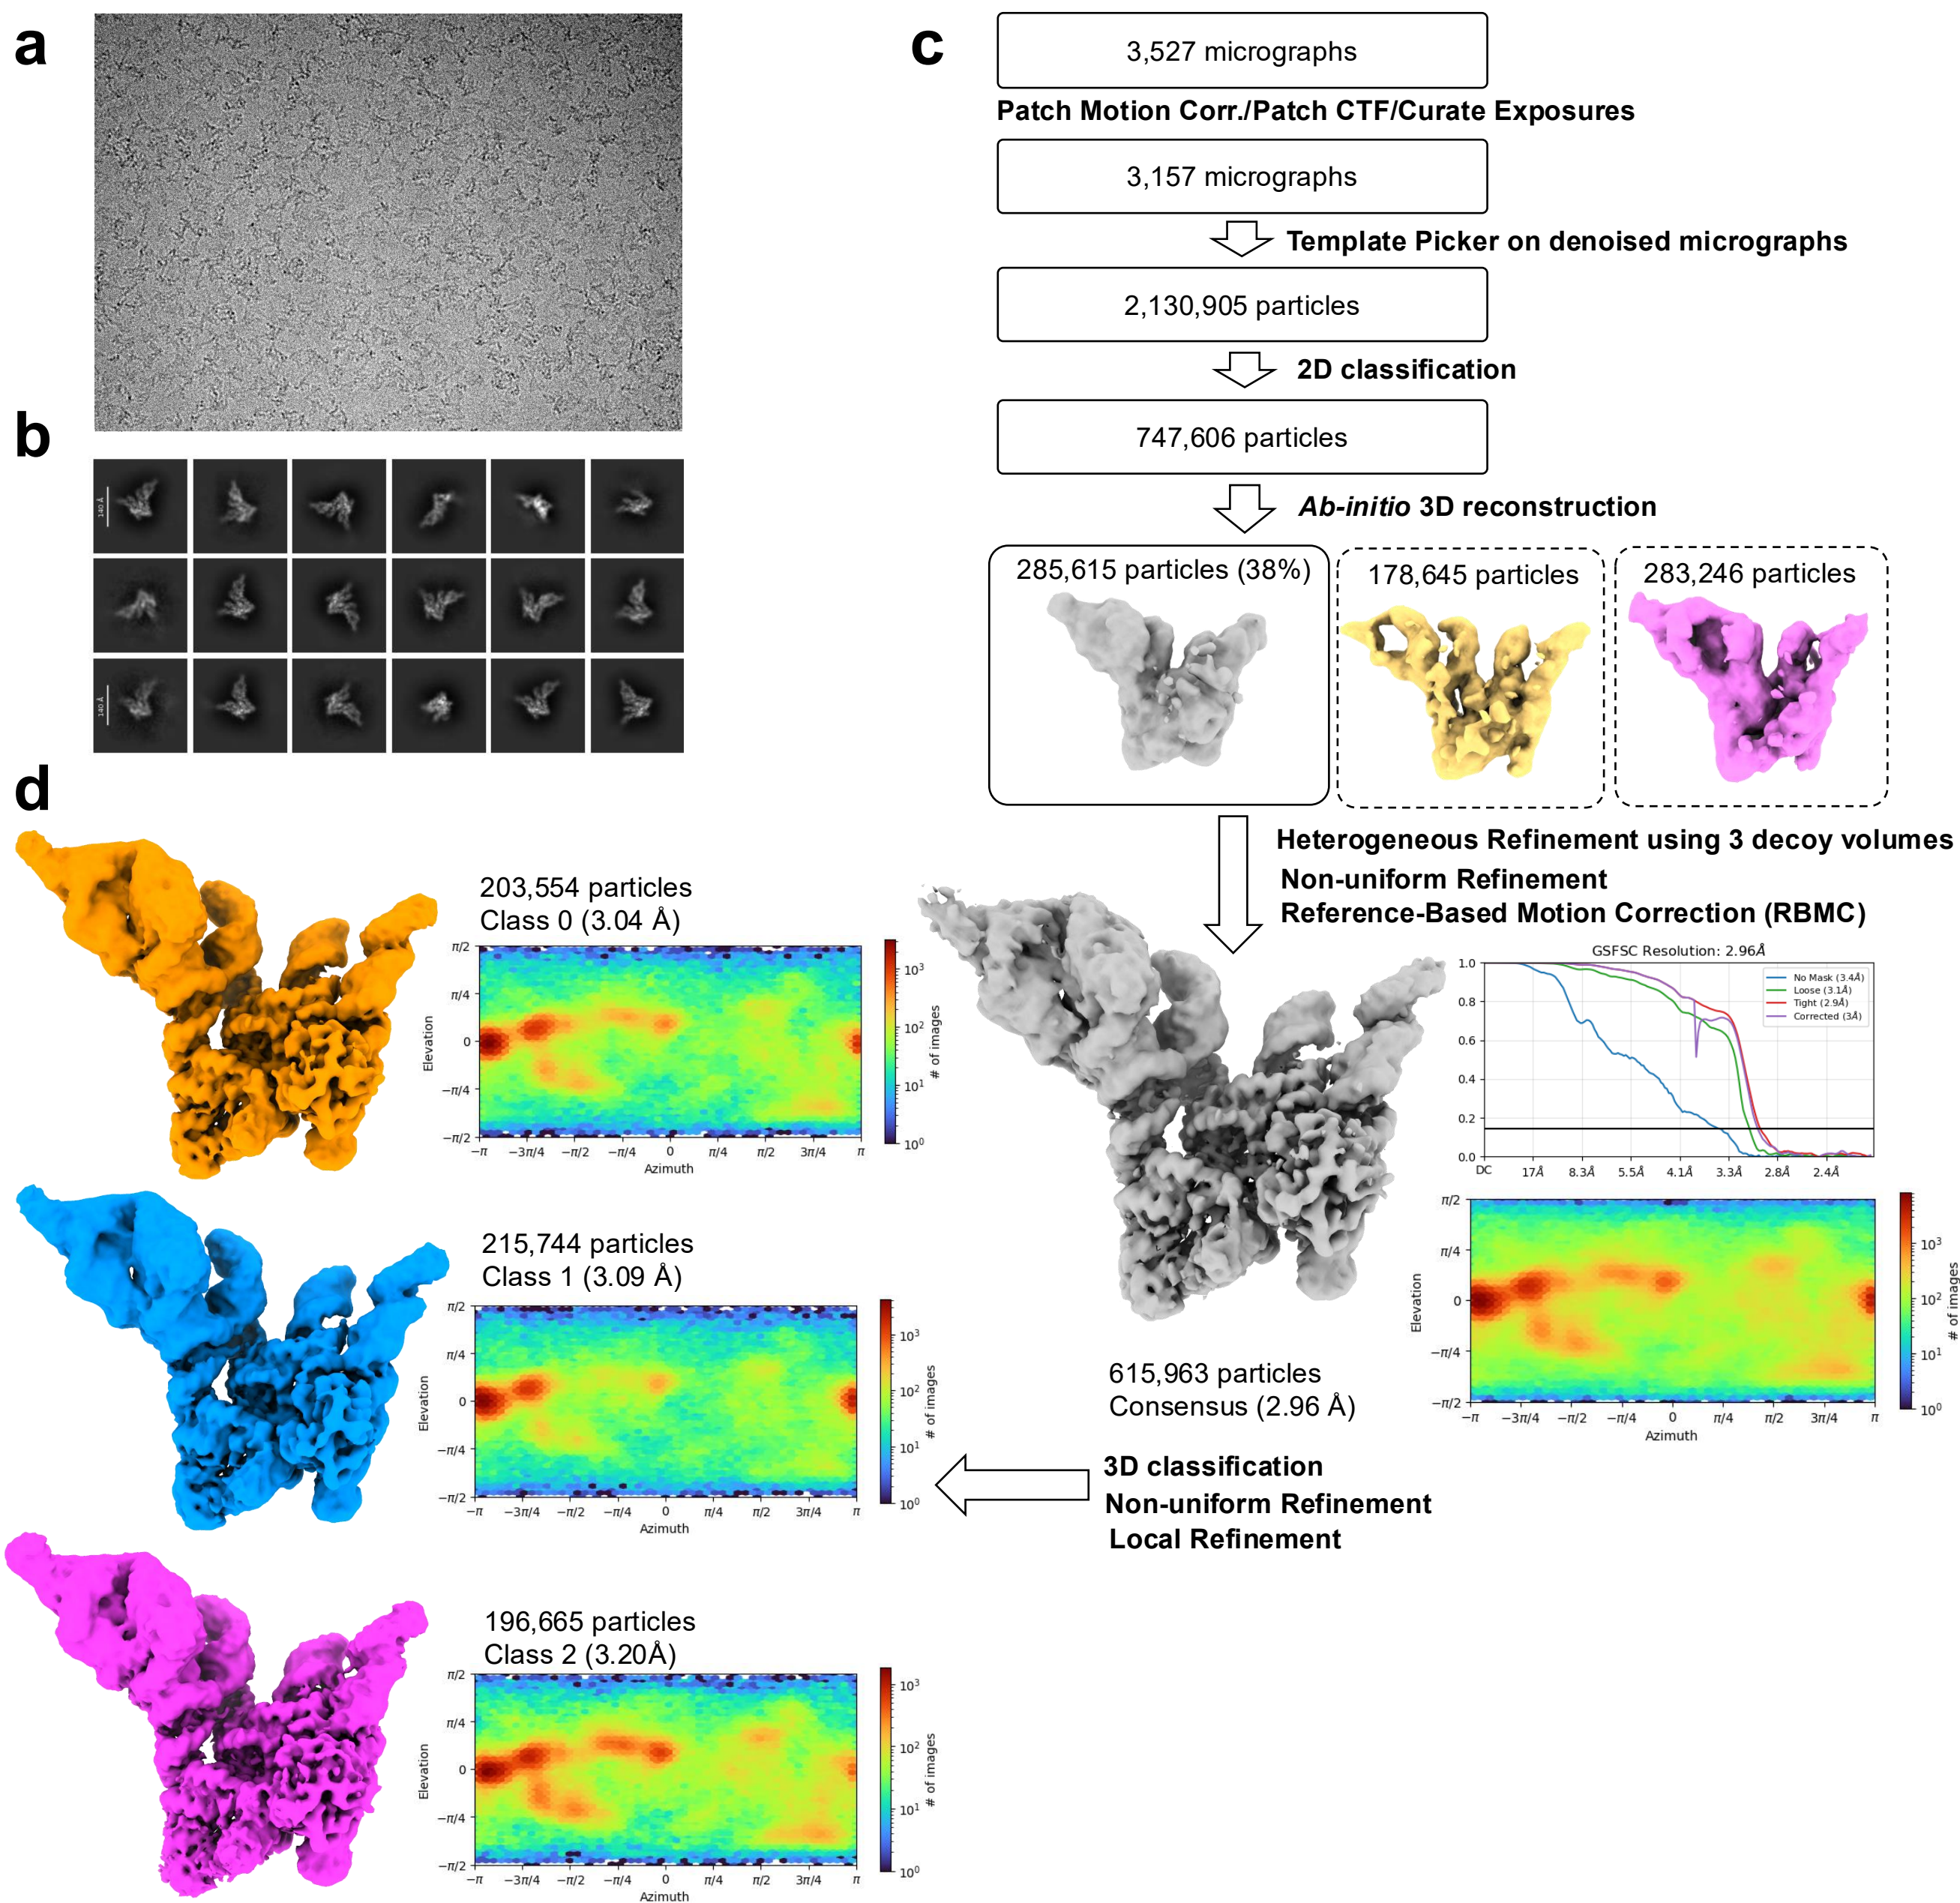

**Supplementary Fig. 3 | Cryo-EM workflow and analysis of RNase P RNA holoenzyme (holoE), related to Figure S3B. (A)** Representative cryo-EM micrograph after motion correction. **(B)** Representative 2D class averages of extracted particles. **(C)** CryoSPARC workflow from image processing to 3D reconstruction and refinement, including reference-based motion correction (RBMC). **(D)** The consensus volume of holoE was sub-classified into three distinct volumes. The Euler angle distribution of the particle images for the three cryo-EM maps is shown on the right.

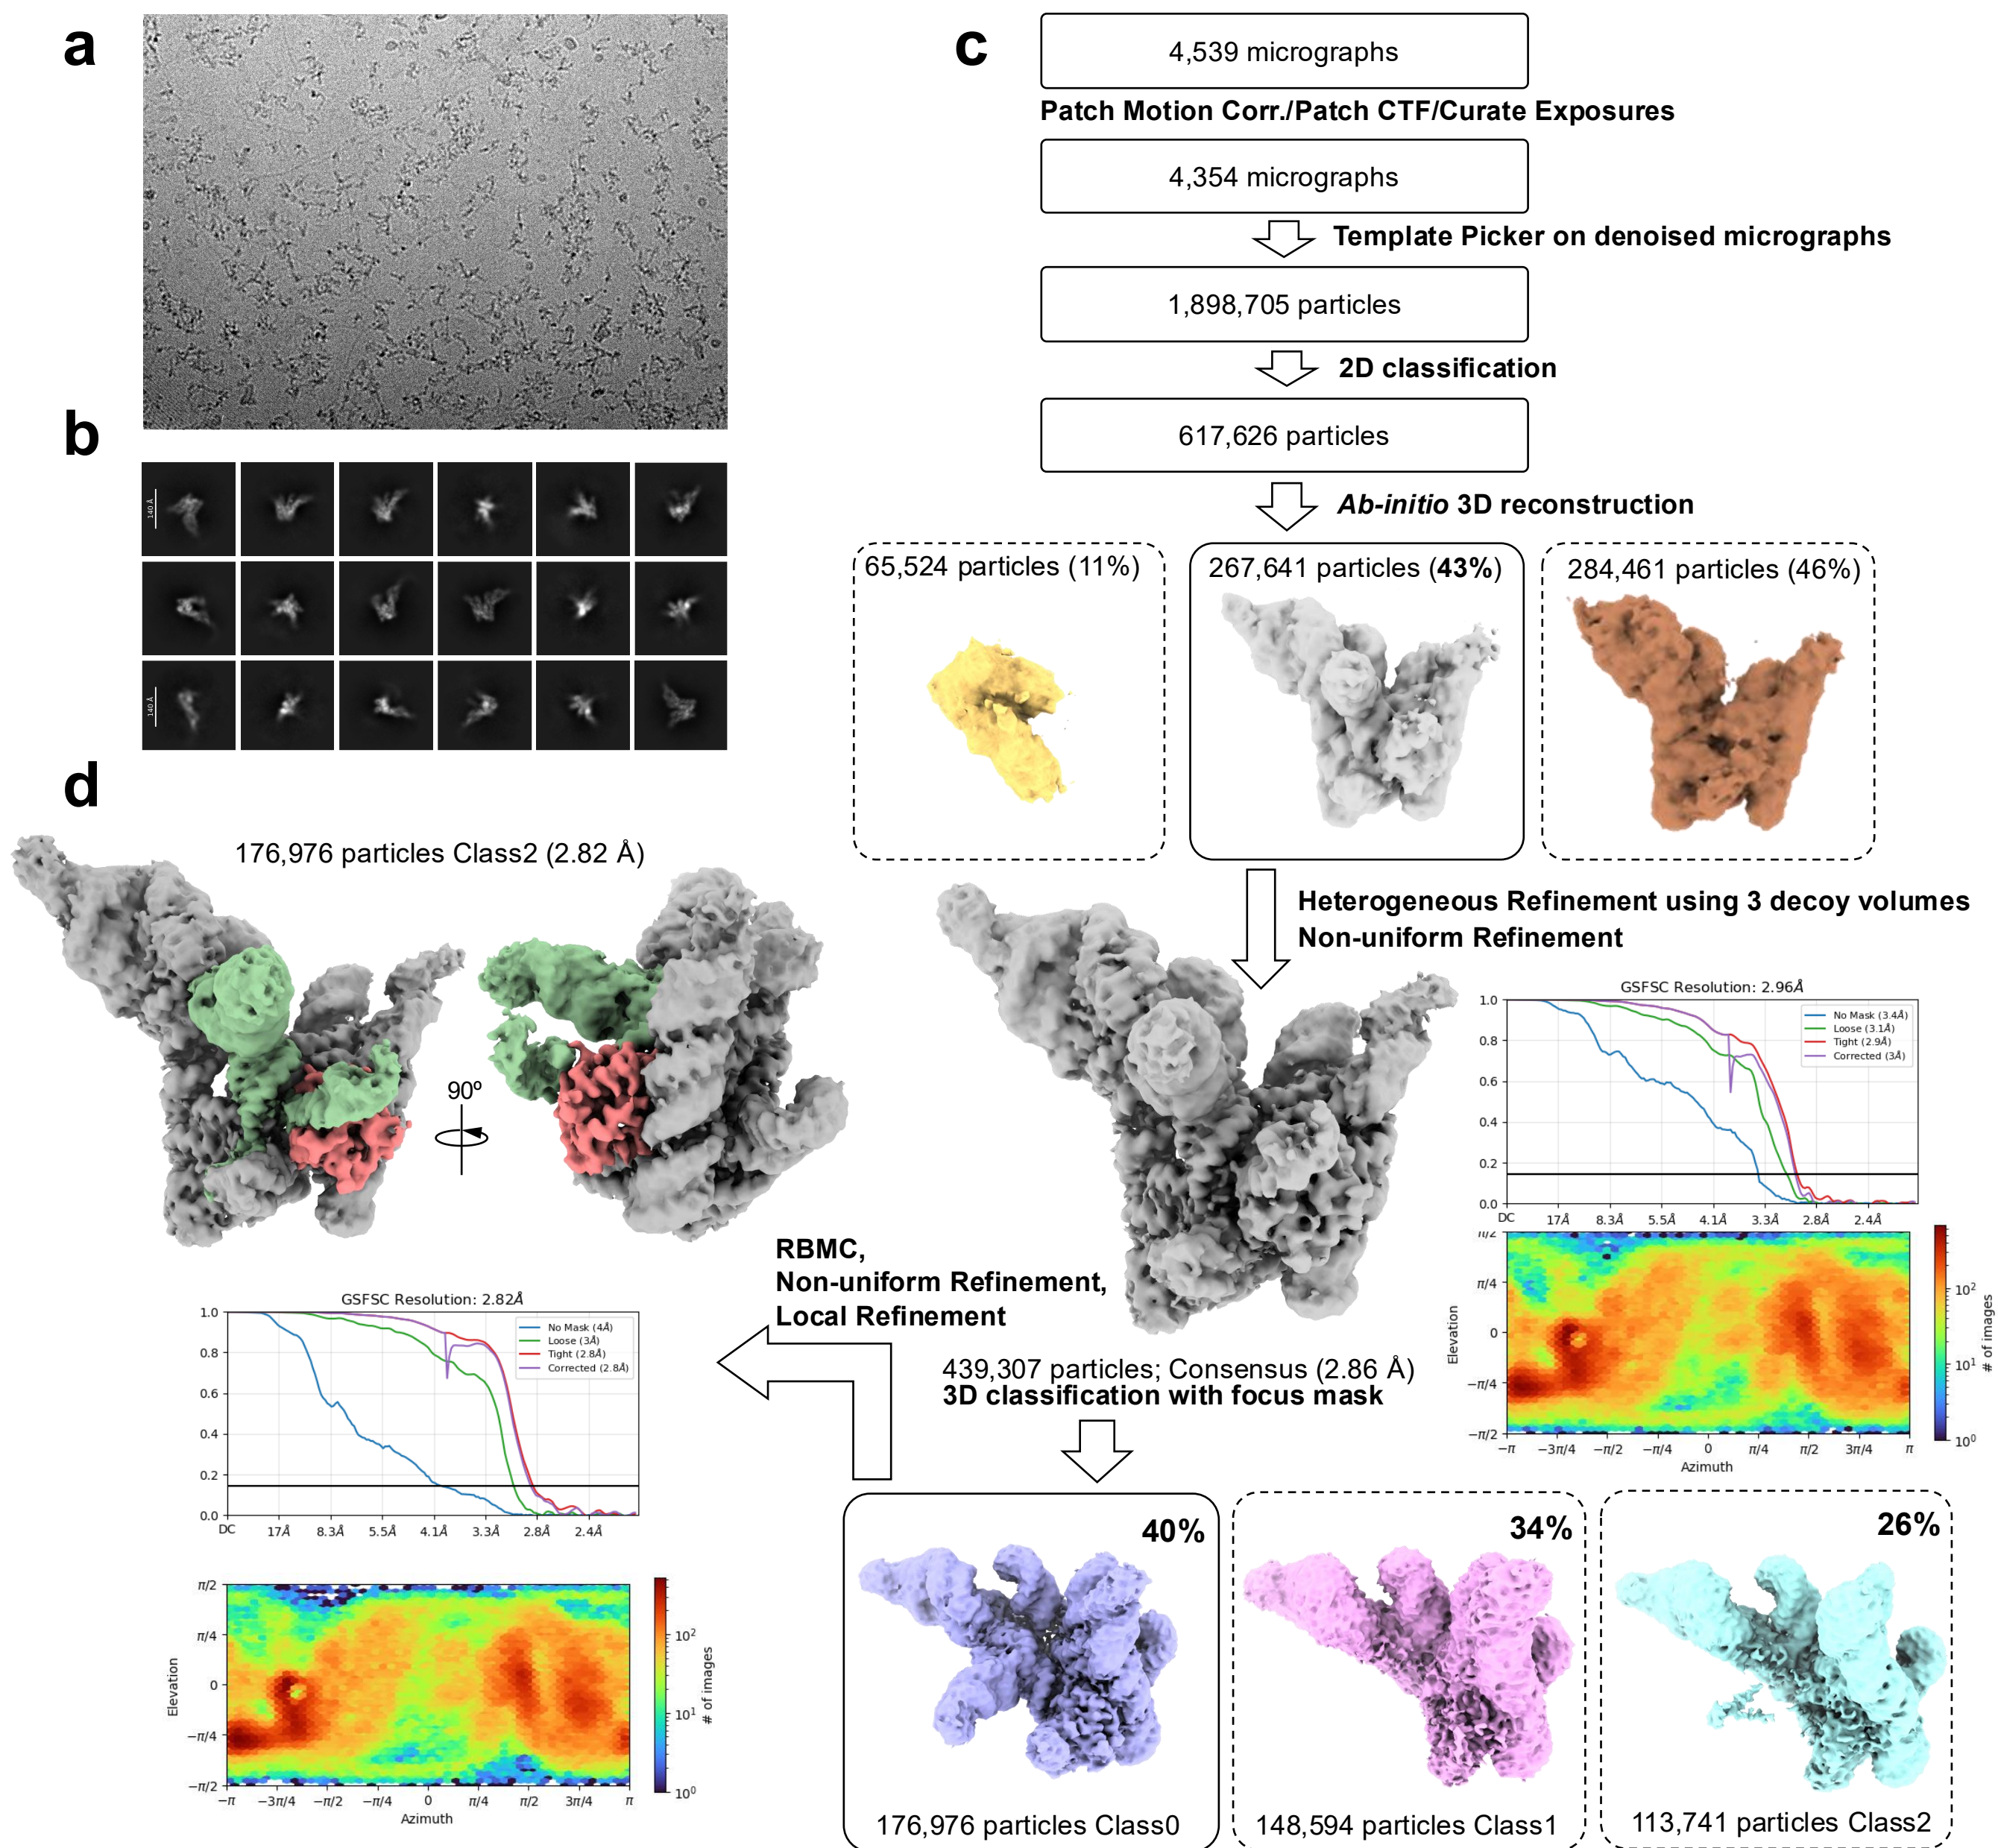

**Supplementary Fig. 4 | Cryo-EM workflow and analysis of RNase P holoenzyme in complex with pre-tRNA (holoES). (A)** Representative cryo-EM micrograph after motion correction. **(B)** Representative 2D class averages of extracted particles. **(C)** CryoSPARC workflow from image processing to 3D reconstruction and refinement. The consensus volume particle stack was subclassified by 3D classification using a focus mask around the tRNA to purify the particles containing substrate. **(D)** The purified stack of holoES particles was polished by reference-based motion correction (RBMC), followed by non-uniform and local refinement. Euler angle distribution of the particle images for the cryo-EM map is shown at the bottom.

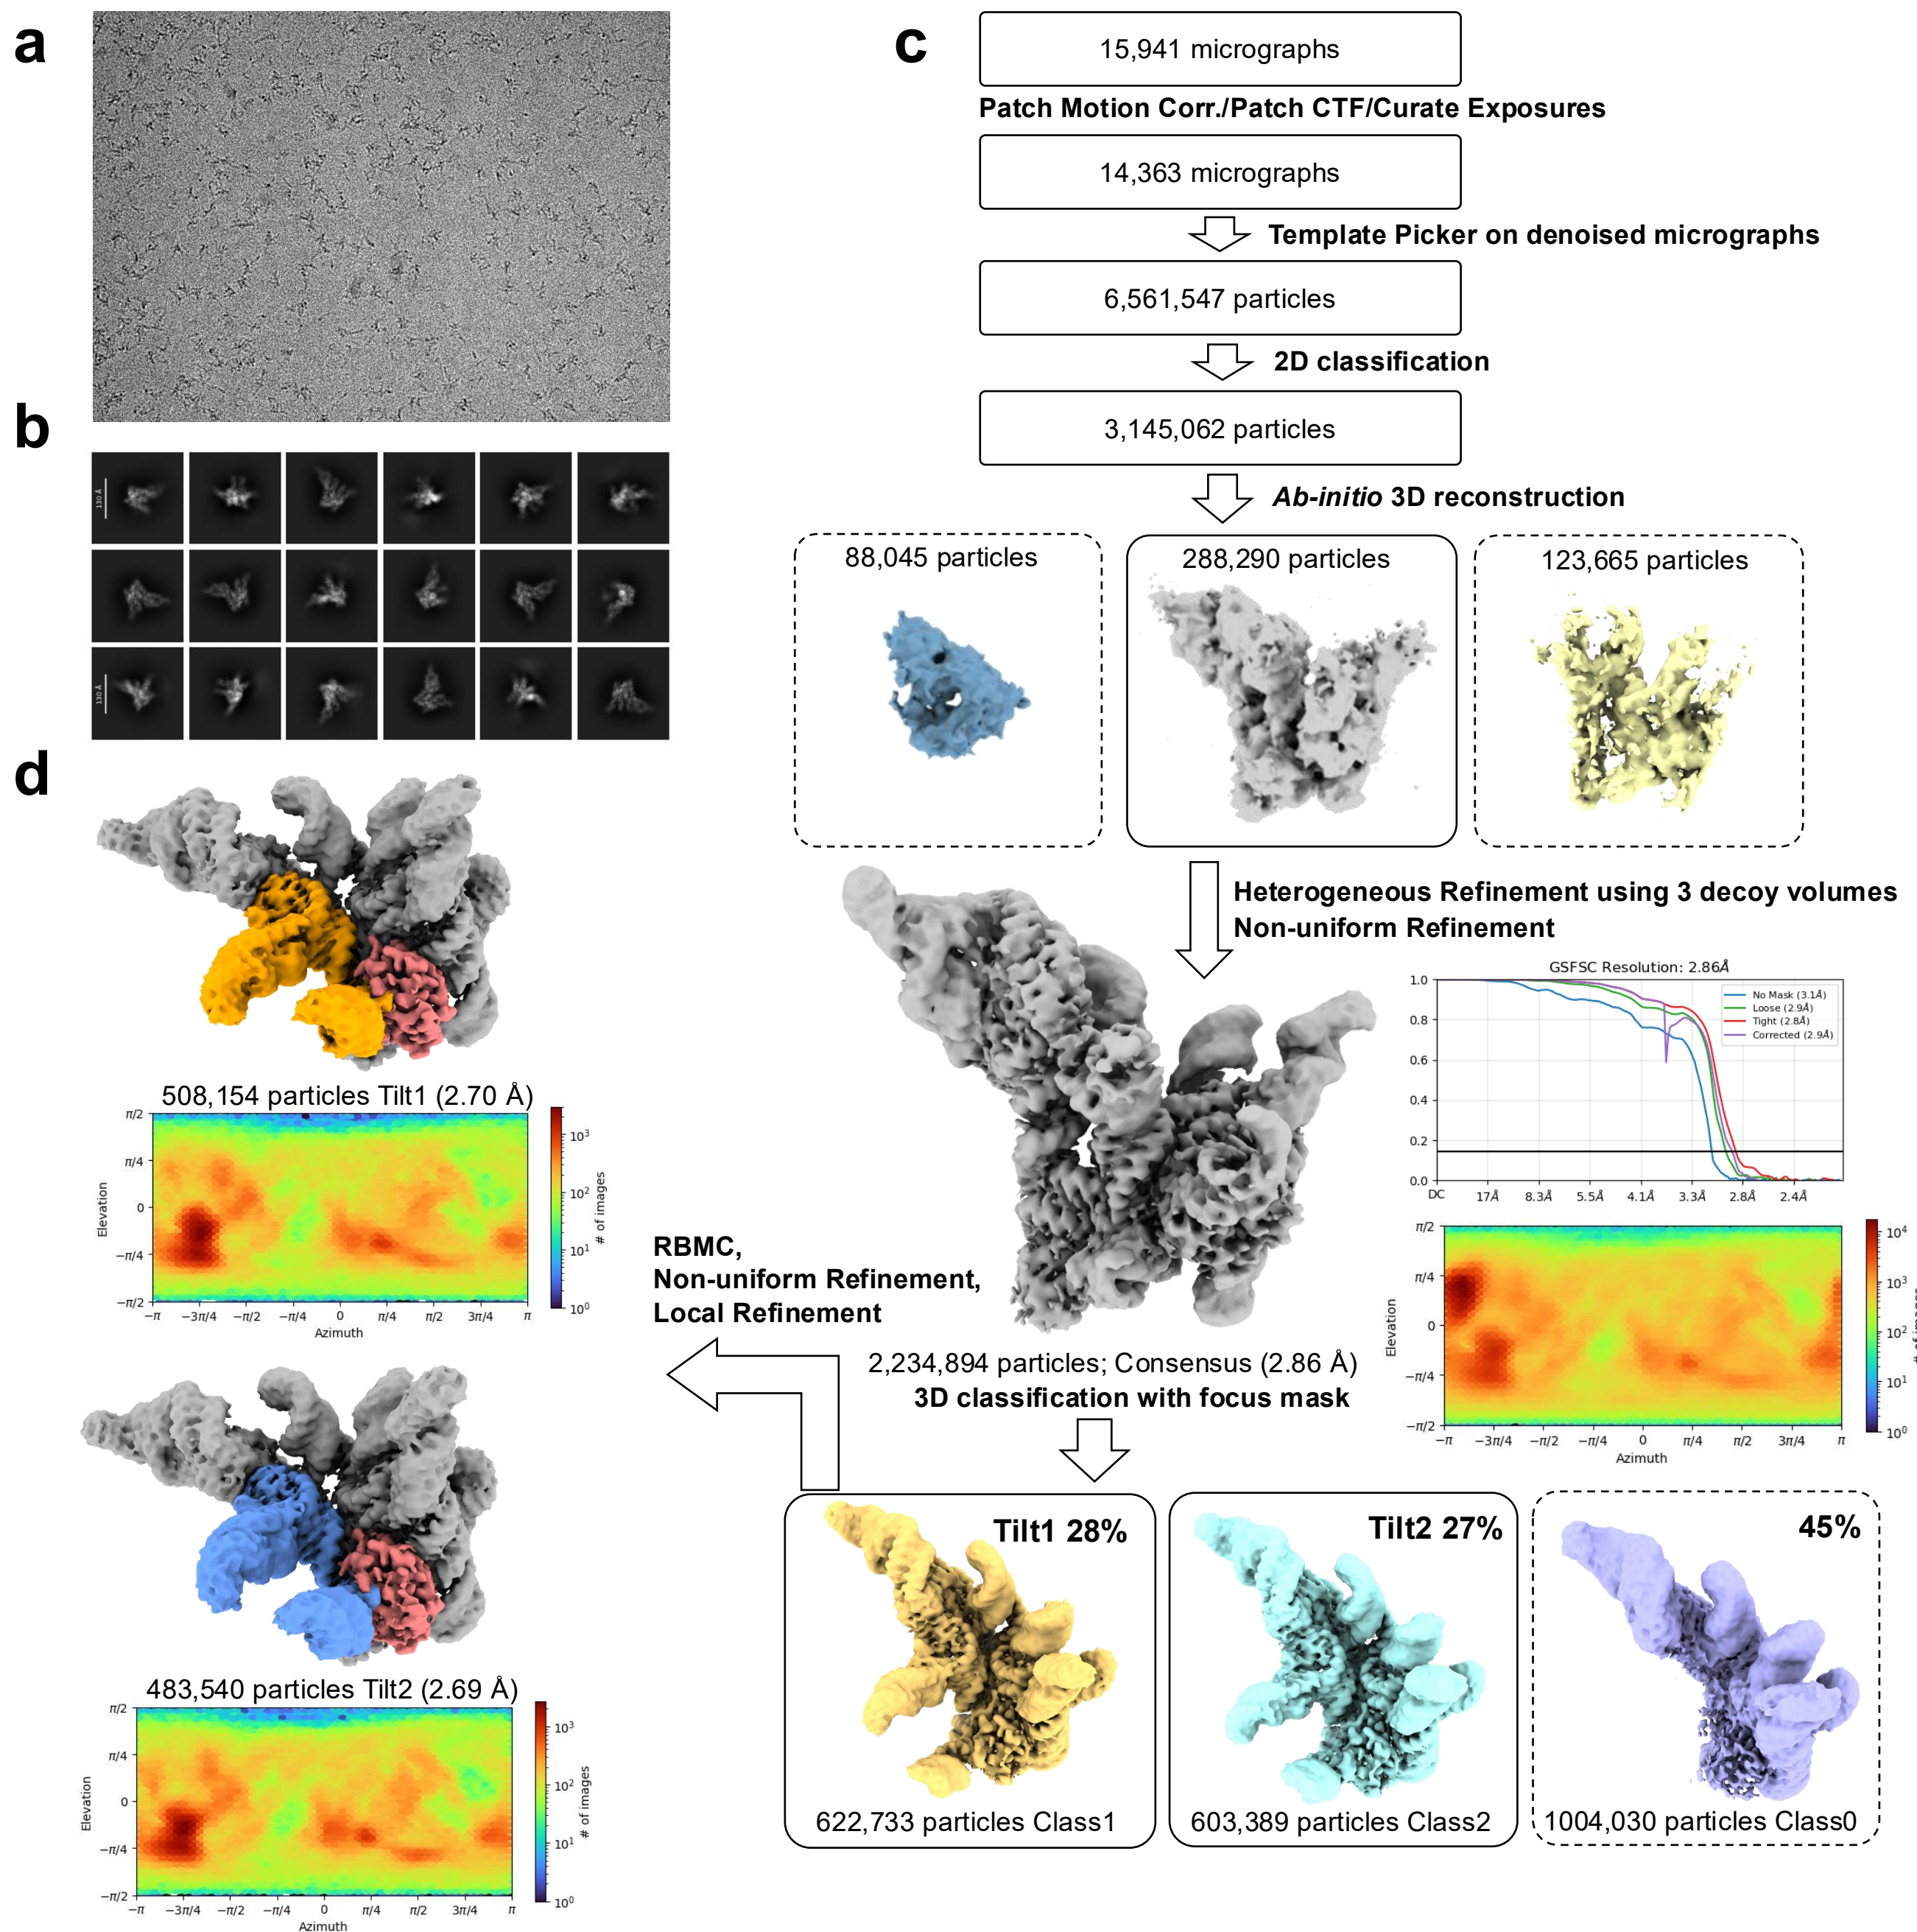

**Supplementary Fig. 5 | Cryo-EM workflow and analysis of RNase P holoenzyme in complex with loop-back (LB) pre-tRNA. (A)** Representative cryo-EM micrograph after motion correction. **(B)** Representative 2D class averages of extracted particles. **(C)** CryoSPARC workflow from image processing to 3D reconstruction and refinement. The consensus volume particle stack was subclassified by 3D classification using a focus mask around the tRNA to purify the particles containing substrate, which resulted in the two volumes with different tRNA tilt angles **(D)** The purified stacks of particles were polished by reference-based motion correction (RBMC), followed by non-uniform and local refinement. Euler angle distribution of the particle stacks for the two cryo-EM maps of holoES-LB-pre-tRNA is shown at the bottom.

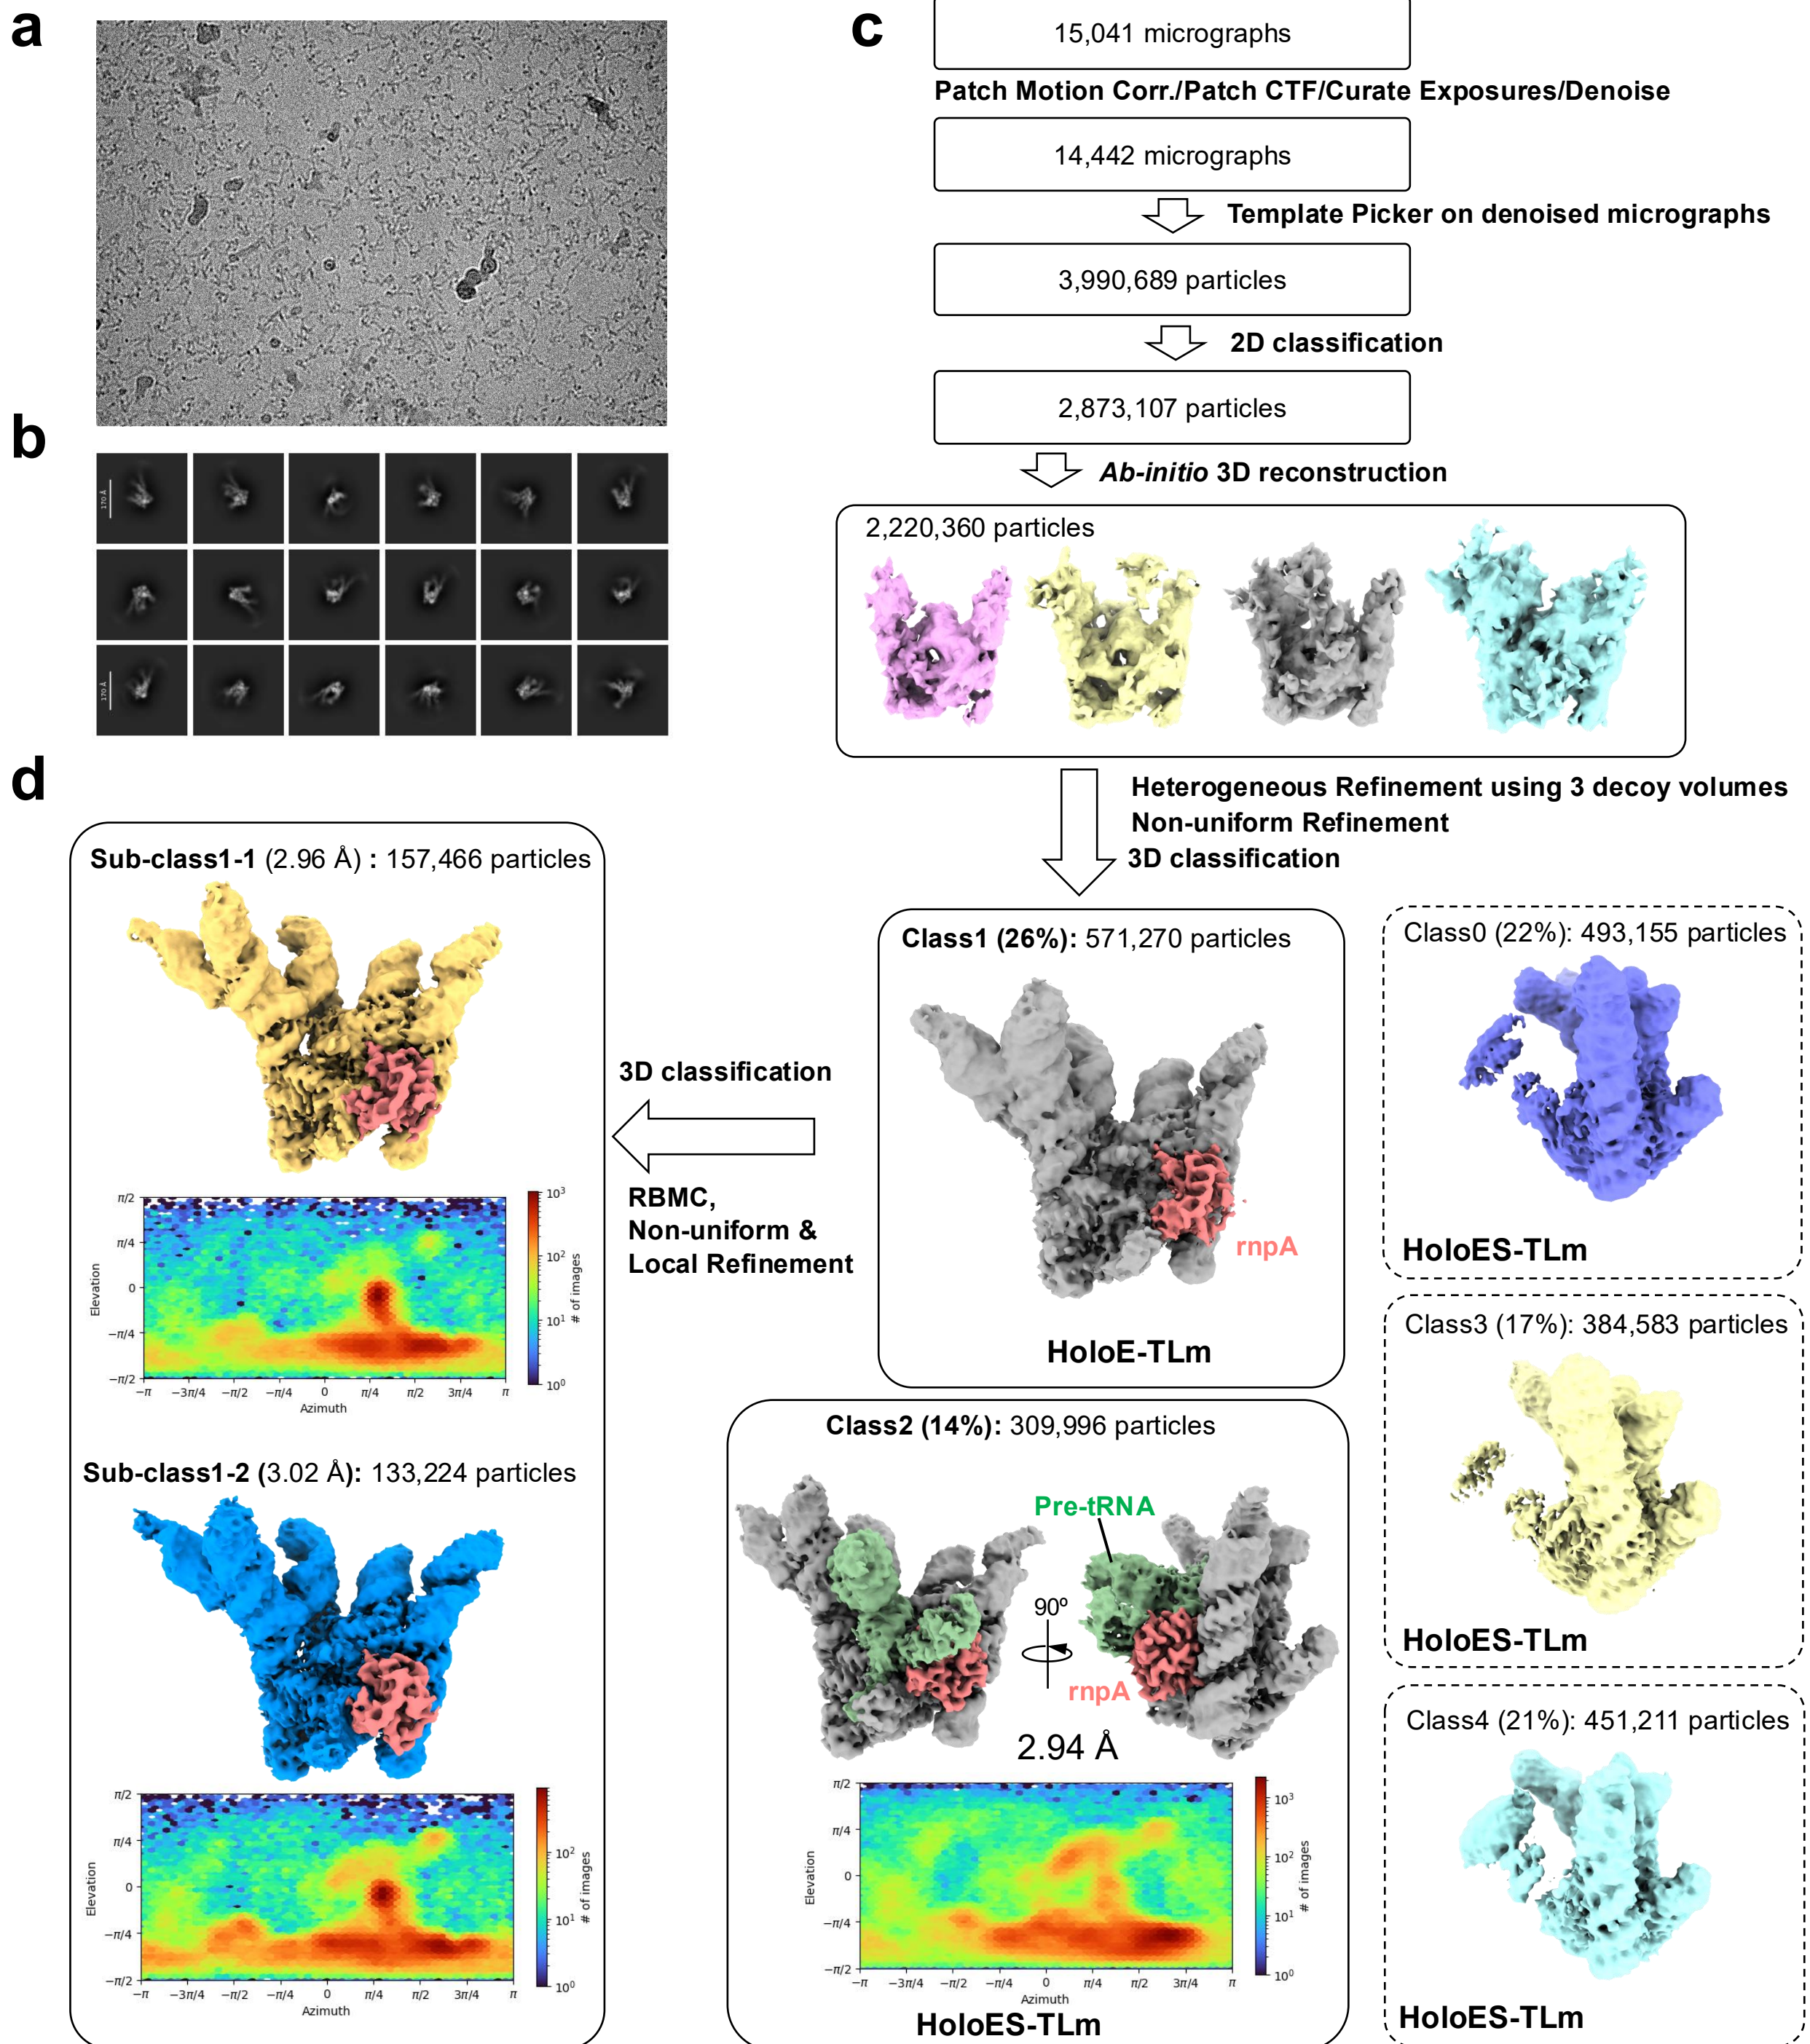

**Supplementary Fig. 6 | Cryo-EM workflow and analysis of RNase P tetraloop mutant holoenzyme (TLm-holoE) and its complex with pre-tRNA (TLm-holoES).** (A) Representative cryo-EM micrograph after motion correction. (B) Representative 2D class averages of extracted particles. (C) CryoSPARC workflow from image processing to 3D reconstruction and refinement. The consensus volume particle stack was subclassified by 3D classification into five distinct sub-volumes. Three of these volumes (Classes 0, 3, and 4) showed partial density for pre-tRNA in a location different from the catalytic position. One volume (Class 2) showed the complete ternary complex (holoES-TLm), and one volume (Class 1) showed no bound substrate (holoE-TLm). (D) The holoE-TLm volume was further classified into two sub-volumes based on the differences in the S-domain. The final volumes of holoE-TLm and holoES-TLm were polished by reference-based motion correction (RBMC), followed by non-uniform and local refinement. Euler angle distribution of the particle images for the three cryo-EM maps is shown at the bottom.
