# Supplementary material for: Three-metal-ion catalysis by ribonuclease P holoenzyme: a new mechanistic insight into transfer RNA maturation
Source: Research Square preprint supplement (doi:10.21203/rs.3.rs-9187222/v1), 2026-05-14
Supplement: Supplementary file 3 [file a60c9d986f94efb80c347cfc.pdf]

**Supplementary Table 1. Cryo-EM data collection, processing, structural refinement, and validation statistics of wild-type RNase P in the catalytic cycle.**

|                                                            | holoE<br>(consensus)<br>5 mM Ca <sup>2+</sup> | holoE<br>(consensus)<br>5 mM Mg <sup>2+</sup> | holoES<br>pre-tRNA<br>5 mM Ca <sup>2+</sup> | holoES<br>pre-tRNA<br>1 mM Ca <sup>2+</sup> | holoES<br>(nc)<br>pre-tRNA | holoES<br>(LB) tilt1<br>pre-tRNA | holoES<br>(LB) tilt2<br>pre-tRNA | holoEP<br>mat-tRNA |
|------------------------------------------------------------|-----------------------------------------------|-----------------------------------------------|---------------------------------------------|---------------------------------------------|----------------------------|----------------------------------|----------------------------------|--------------------|
| <b>Magnification</b>                                       | 150,000                                       | 150,000                                       | 150,000                                     | 150,000                                     | 150,000                    | 150,000                          | 150,000                          | 150,000            |
| <b>Voltage (keV)</b>                                       | 200                                           | 200                                           | 200                                         | 200                                         | 200                        | 200                              | 200                              | 200                |
| <b>Electron exposure<br/>(e<sup>-</sup>/Å<sup>2</sup>)</b> | 57                                            | 57                                            | 57                                          | 57                                          | 57                         | 57                               | 57                               | 57                 |
| <b>Defocus range (μm)</b>                                  | -0.5 to -1.5                                  | -0.5 to -1.5                                  | -0.5 to -1.5                                | -0.5 to -1.5                                | -0.5 to -1.5               | -0.5 to -1.5                     | -0.5 to -1.5                     | -0.5 to -1.5       |
| <b>Pixel size (Å)</b>                                      | 1.038                                         | 1.038                                         | 1.038                                       | 1.038                                       | 1.038                      | 1.038                            | 1.038                            | 1.038              |
| <b>Particle numbers</b>                                    | 615,963                                       | 998,359                                       | 176,972                                     | 229,735                                     | 113,818                    | 508,154                          | 483,540                          | 50,839             |
| <b>Map resolution (Å)</b>                                  | 2.96                                          | 2.87                                          | 2.82                                        | 2.93                                        | 2.83                       | 2.70                             | 2.69                             | 3.02               |
| <b>FSC threshold</b>                                       | 0.143                                         | 0.143                                         | 0.143                                       | 0.143                                       | 0.143                      | 0.143                            | 0.143                            | 0.143              |
| <b>EMDB</b>                                                | EMD-70941                                     | EMD-70942                                     | EMD-70943                                   | EMD-70944                                   | EMD-70946                  | EMD-70947                        | EMD-70948                        | EMD-70945          |
| <b>Model composition</b>                                   |                                               |                                               |                                             |                                             |                            |                                  |                                  |                    |
| <b>Non-hydrogen atoms</b>                                  | 9,928                                         | 9,931                                         | 12,017                                      | 12,012                                      | 11,704                     | 12,230                           | 12,233                           | 11,538             |
| <b>Protein residue</b>                                     | 116                                           | 116                                           | 116                                         | 116                                         | 116                        | 116                              | 116                              | 116                |
| <b>RNA residue</b>                                         | 417                                           | 417                                           | 515                                         | 515                                         | 500                        | 525                              | 525                              | 492                |
| <b>Mg<sup>2+</sup> or Ca<sup>2+</sup></b>                  | 19                                            | 22                                            | 31                                          | 26                                          | 30                         | 28                               | 31                               | 28                 |
| <b>B factors (Å<sup>2</sup>) mean</b>                      |                                               |                                               |                                             |                                             |                            |                                  |                                  |                    |
| <b>Protein</b>                                             | 99.27                                         | 96.53                                         | 84.09                                       | 103.05                                      | 85.92                      | 48.84                            | 68.58                            | 166.39             |
| <b>RNA</b>                                                 | 227.70                                        | 210.10                                        | 172.66                                      | 217.28                                      | 178.64                     | 131.80                           | 137.27                           | 174.08             |
| <b>Mg<sup>2+</sup> or Ca<sup>2+</sup></b>                  | 71.42                                         | 74.55                                         | 74.41                                       | 110.77                                      | 97.35                      | 64.02                            | 81.03                            | 91.75              |
| <b>R.m.s. deviations</b>                                   |                                               |                                               |                                             |                                             |                            |                                  |                                  |                    |
| <b>Bond lengths (Å)</b>                                    | 0.003                                         | 0.003                                         | 0.003                                       | 0.003                                       | 0.003                      | 0.003                            | 0.004                            | 0.003              |
| <b>Bond angles (°)</b>                                     | 0.672                                         | 0.703                                         | 0.634                                       | 0.661                                       | 0.629                      | 0.642                            | 0.645                            | 0.672              |
| <b>Validation</b>                                          |                                               |                                               |                                             |                                             |                            |                                  |                                  |                    |
| <b>MolProbity score</b>                                    | 2.40                                          | 2.13                                          | 2.06                                        | 2.10                                        | 1.78                       | 1.77                             | 1.39                             | 1.64               |
| <b>Clashscore</b>                                          | 8.35                                          | 8.35                                          | 7.53                                        | 7.86                                        | 7.45                       | 7.51                             | 6.93                             | 7.44               |
| <b>CC<sub>Mask</sub></b>                                   | 0.84                                          | 0.88                                          | 0.89                                        | 0.84                                        | 0.88                       | 0.89                             | 0.88                             | 0.86               |
| <b>CC<sub>Box</sub></b>                                    | 0.90                                          | 0.91                                          | 0.91                                        | 0.89                                        | 0.90                       | 0.91                             | 0.91                             | 0.90               |
| <b>Rotamer outliers (%)</b>                                | 4.04                                          | 2.02                                          | 7.07                                        | 3.03                                        | 3.03                       | 2.02                             | 1.01                             | 2.02               |
| <b>Ramachandran outliers (%)</b>                           | 0                                             | 0                                             | 0                                           | 0                                           | 0                          | 0                                | 0                                | 0                  |
| <b>PDB</b>                                                 | 9OWR                                          | 9OWS                                          | 9OWT                                        | 9OWU                                        | 9OWW                       | 9OWX                             | 9OWY                             | 9OWV               |

Footnote: Holoenzyme (holoE), holoenzyme-substrate complex (holoES), holoenzyme-product complex (holoEP), correlation coefficient (CC), Fourier shell correlation (FSC), loop-back (LB), non-complementary (nc).

**Supplementary Table 2. Cryo-EM data collection, processing, structural refinement, and validation statistics of RNase P tetraloop mutant (TLm) in the catalytic cycle.**

|                                                            | TLm holoE<br>(subclass 1) | TLm holoE<br>(subclass 2) | TLm holoES<br>(consensus) |
|------------------------------------------------------------|---------------------------|---------------------------|---------------------------|
| <b>Magnification</b>                                       | 150,000                   | 150,000                   | 150,000                   |
| <b>Voltage (kV)</b>                                        | 200                       | 200                       | 200                       |
| <b>Electron exposure<br/>(e<sup>-</sup>/Å<sup>2</sup>)</b> | 57                        | 57                        | 57                        |
| <b>Defocus range (μm)</b>                                  | -0.5 to -1.5              | -0.5 to -1.5              | -0.5 to -1.5              |
| <b>Pixel size (Å)</b>                                      | 1.038                     | 1.038                     | 1.038                     |
| <b>Particle numbers</b>                                    | 133,224                   | 157,466                   | 309,996                   |
| <b>Map resolution (Å)</b>                                  | 3.02                      | 2.96                      | 2.94                      |
| <b>FSC threshold</b>                                       | 0.143                     | 0.143                     | 0.143                     |
| <b>EMDB</b>                                                | EMD-70997                 | EMD-70998                 | EMD-71000                 |
| <b>Model composition</b>                                   |                           |                           |                           |
| <b>Non-hydrogen atoms</b>                                  | 9,924                     | 9,925                     | 12,002                    |
| <b>Protein residue</b>                                     | 116                       | 116                       | 116                       |
| <b>RNA residue</b>                                         | 417                       | 417                       | 515                       |
| <b>Mg<sup>2+</sup> or Ca<sup>2+</sup></b>                  | 24                        | 25                        | 25                        |
| <b><i>B</i> factors (Å<sup>2</sup>) mean</b>               |                           |                           |                           |
| <b>Protein</b>                                             | 147.72                    | 106.01                    | 80.63                     |
| <b>RNA</b>                                                 | 213.96                    | 197.81                    | 189.46                    |
| <b>Mg<sup>2+</sup> or Ca<sup>2+</sup></b>                  | 75.51                     | 74.12                     | 89.42                     |
| <b>R.m.s. deviations</b>                                   |                           |                           |                           |
| <b>Bond lengths (Å)</b>                                    | 0.003                     | 0.004                     | 0.003                     |
| <b>Bond angles (°)</b>                                     | 0.673                     | 0.703                     | 0.663                     |
| <b>Validation</b>                                          |                           |                           |                           |
| <b>MolProbity score</b>                                    | 1.84                      | 2.03                      | 1.51                      |
| <b>Clashscore</b>                                          | 6.80                      | 7.97                      | 6.86                      |
| <b>CC<sub>Mask</sub></b>                                   | 0.82                      | 0.85                      | 0.86                      |
| <b>CC<sub>Box</sub></b>                                    | 0.88                      | 0.88                      | 0.89                      |
| <b>Rotamer outliers (%)</b>                                | 4.04                      | 3.03                      | 1.01                      |
| <b>Ramachandran outliers (%)</b>                           | 0                         | 0                         | 0                         |
| <b>PDB</b>                                                 | 9OY5                      | 9OY6                      | 9OY7                      |

Footnote: Holoenzyme (holoE), holoenzyme-substrate complex (holoES), correlation coefficient (CC), Fourier shell correlation (FSC), Tetraloop mutant (TLm).

**Supplementary Table 3. Metal ion binding site validation.**

| holoE (consensus) in 5 mM Ca <sup>2+</sup> ; PBD ID: 9OWR; EMDB: EMD-70941 |           |                            |                               |                      |                      |                             |                       |                      |                      |
|----------------------------------------------------------------------------|-----------|----------------------------|-------------------------------|----------------------|----------------------|-----------------------------|-----------------------|----------------------|----------------------|
| Metal ID                                                                   | Occupancy | Bfactor(env.) <sup>1</sup> | Atomic contacts               | Valence <sup>2</sup> | nVECSUM <sup>3</sup> | Geometry <sup>1,4</sup>     | gRMSD(°) <sup>1</sup> | Vacancy <sup>1</sup> | Ranking (points)     |
| Ca1                                                                        | 1.0       | <u>80.3 (0.0)</u>          |                               | N/A                  | N/A                  | <u>Free</u>                 | N/A                   | N/A                  | Ca(0), Na(0), Mg(0)  |
| Ca3                                                                        | 1.0       | <u>61.7 (40.4)</u>         | O <sub>2</sub>                | <u>0.3</u>           | <u>0.87</u>          | Octahedral                  | 11.0°                 | <u>66%</u>           | Na(3), Mg(3), Ca(3)  |
| Ca4                                                                        | 1.0       | <u>72.9 (43.7)</u>         | O <sub>1</sub> N <sub>1</sub> | <u>0.15</u>          | <u>0.76</u>          | Octahedral                  | 8.6°                  | <u>66%</u>           | Na(2), Mg(2), Ca(2), |
| Ca5                                                                        | 1.0       | 40.6 (41.5)                | O <sub>3</sub>                | <u>0.18</u>          | <u>0.59</u>          | Octahedral                  | <u>14.0°</u>          | <u>50%</u>           | Ca(4), Na(4), Mg(4)  |
| Ca6                                                                        | 1.0       | <u>79.5 (103.2)</u>        | O <sub>1</sub>                | <u>0.03</u>          | <u>1.0</u>           | <u>Poorly Coordinated</u>   | N/A                   | N/A                  | Ca(0), Na(0), Mg(0)  |
| Ca7                                                                        | 1.0       | <u>51.5 (82.1)</u>         | O <sub>2</sub>                | <u>0.4</u>           | <u>0.94</u>          | Octahedral                  | <u>27.4°</u>          | <u>66%</u>           | Na(3), Mg(3), Ca(3)  |
| Ca8                                                                        | 1.0       | <u>102.3 (74.5)</u>        |                               | N/A                  | N/A                  | <u>Free</u>                 | N/A                   | N/A                  | Ca(0), Na(0), Mg(0)  |
| Ca9 (MeA)                                                                  | 1.0       | 47.4 (43.4)                | O <sub>3</sub>                | <u>0.8</u>           | <u>0.72</u>          | Octahedral                  | 11.0°                 | <u>50%</u>           | Na(5), Mg(4), Ca(4)  |
| Ca10                                                                       | 1.0       | <u>36.4 (28.9)</u>         | O <sub>2</sub>                | <u>0.2</u>           | <u>0.83</u>          | Octahedral                  | <u>20.3°</u>          | <u>66%</u>           | Ca(3), Na(3), Mg(3)  |
| Ca11                                                                       | 1.0       | <u>101.1 (76.9)</u>        | O <sub>2</sub>                | <u>0.5</u>           | <u>0.86</u>          | Octahedral                  | <u>22.0°</u>          | <u>66%</u>           | Na(3), Mg(3), Ca(3)  |
| Ca12                                                                       | 1.0       | 60.1 (53.7)                | O <sub>2</sub> N <sub>2</sub> | <u>0.4</u>           | <u>0.41</u>          | <u>Tetrahedral</u>          | <u>24.4°</u>          | 0                    | Na(1), Mg(0), Ca(0)  |
| Ca13                                                                       | 1.0       | <u>78.7 (0.0)</u>          |                               | N/A                  | N/A                  | <u>Free</u>                 | N/A                   | N/A                  | Ca(0), Na(0), Mg(0)  |
| Ca14                                                                       | 1.0       | 42.9 (39.6)                | O <sub>4</sub>                | <u>0.7</u>           | <u>0.6</u>           | Octahedral                  | 8.8°                  | <u>66%</u>           | Na(5), Mg(4), Ca(4)  |
| Ca15                                                                       | 1.0       | <u>98.3 (53.4)</u>         |                               | N/A                  | N/A                  | <u>Free</u>                 | N/A                   | N/A                  | Ca(0), Na(0), Mg(0)  |
| Ca16                                                                       | 1.0       | <u>81.3 (0.0)</u>          |                               | N/A                  | N/A                  | <u>Free</u>                 | N/A                   | N/A                  | Ca(0), Na(0), Mg(0)  |
| Ca17                                                                       | 1.0       | <u>47.4 (40.5)</u>         | O <sub>4</sub>                | <u>1.2</u>           | <u>0.31</u>          | <u>Trigonal Bipyramidal</u> | 11.3°                 | <u>20%</u>           | Na(5), Mg(2), Ca(2)  |
| Ca18                                                                       | 1.0       | <u>67.9 (90.0)</u>         | O <sub>3</sub> N <sub>1</sub> | <u>0.7</u>           | <u>0.57</u>          | Octahedral                  | <u>18.4°</u>          | <u>33%</u>           | Na(5), Mg(4), Ca(2)  |
| Ca19                                                                       | 1.0       | 89.9 (100.4)               | O <sub>1</sub>                | <u>0.05</u>          | <u>1.0</u>           | <u>Poorly Coordinated</u>   | N/A                   | N/A                  | Ca(0), Na(0), Mg(0)  |
| holoE (consensus) in 5 mM Mg <sup>2+</sup> ; PBD ID: 9OWS; EMDB: EMD-70942 |           |                            |                               |                      |                      |                             |                       |                      |                      |
| Metal ID                                                                   | Occupancy | Bfactor(env.) <sup>1</sup> | Atomic contacts               | Valence <sup>2</sup> | nVECSUM <sup>3</sup> | Geometry <sup>1,4</sup>     | gRMSD(°) <sup>1</sup> | Vacancy <sup>1</sup> | Ranking (Points)     |
| Mg1                                                                        | 1.0       | 75.1 (75.6)                |                               | N/A                  | N/A                  | <u>Free</u>                 | N/A                   | N/A                  | Mg(0), Na(0)         |
| Mg2                                                                        | 1.0       | <u>70.4 (83.3)</u>         | N <sub>1</sub>                | <u>0.02</u>          | <u>1.0</u>           | <u>Poorly Coordinated</u>   | N/A                   | N/A                  | Mg(0), Na(0)         |
| Mg3                                                                        | 1.0       | 74.5 (64.2)                |                               | N/A                  | N/A                  | <u>Free</u>                 | N/A                   | N/A                  | Mg(0), Na(0)         |
| Mg4                                                                        | 1.0       | <u>51.1 (59.5)</u>         |                               | N/A                  | N/A                  | <u>Free</u>                 | N/A                   | N/A                  | Mg(0), Na(0)         |

| Mg5                                                                             | 1.0       | 83.0 (77.4)                |                                   | N/A                  | N/A                  | <u>Free</u>               | N/A                   | N/A                  | <b>Mg(0)</b> , Na(0)        |
|---------------------------------------------------------------------------------|-----------|----------------------------|-----------------------------------|----------------------|----------------------|---------------------------|-----------------------|----------------------|-----------------------------|
| Mg6                                                                             | 1.0       | 83.9 (79.1)                |                                   | N/A                  | N/A                  | <u>Free</u>               | N/A                   | N/A                  | <b>Mg(0)</b> , Na(0)        |
| Mg7                                                                             | 1.0       | 66.8 (64.6)                | <u>O<sub>1</sub></u>              | <u>0.03</u>          | <u>1.0</u>           | <u>Poorly Coordinated</u> | N/A                   | N/A                  | <b>Mg(0)</b> , Na(0)        |
| Mg8                                                                             | 1.0       | <u>50.6 (59.6)</u>         | <u>O<sub>2</sub></u>              | <u>0.7</u>           | <u>0.71</u>          | Octahedral                | 0.9°                  | <u>66%</u>           | Na(5), <b>Mg(3)</b>         |
| Mg9                                                                             | 1.0       | <u>78.1 (0.0)</u>          |                                   | N/A                  | N/A                  | <u>Free</u>               | N/A                   | N/A                  | <b>Mg(0)</b> , Na(0)        |
| Mg10                                                                            | 1.0       | 53.7 (55.4)                | O <sub>3</sub>                    | <u>0.9</u>           | <u>0.31</u>          | Octahedral                | 11.9°                 | <u>50%</u>           | Na(6), <b>Mg(4)</b>         |
| Mg11                                                                            | 1.0       | <u>72.1 (92.3)</u>         | <u>O<sub>1</sub>N<sub>1</sub></u> | <u>0.5</u>           | <u>0.72</u>          | Octahedral                | 0.5°                  | <u>66%</u>           | Na(4), <b>Mg(3)</b>         |
| Mg12                                                                            | 1.0       | 64.5 (62.4)                |                                   | N/A                  | N/A                  | <u>Free</u>               | N/A                   | N/A                  | <b>Mg(0)</b> , Na(0)        |
| Mg13                                                                            | 1.0       | <u>69.9 (0.0)</u>          |                                   | N/A                  | N/A                  | <u>Free</u>               | N/A                   | N/A                  | <b>Mg(0)</b> , Na(0)        |
| Mg14                                                                            | 1.0       | <u>84.1 (0.0)</u>          |                                   | N/A                  | N/A                  | <u>Free</u>               | N/A                   | N/A                  | <b>Mg(0)</b> , Na(0)        |
| Mg15 (MeA)                                                                      | 1.0       | 58.0 (61.3)                | O <sub>3</sub>                    | <u>0.5</u>           | <u>0.56</u>          | <u>Tetrahedral</u>        | 9.7°                  | <u>25%</u>           | Na(5), <b>Mg(2)</b>         |
| Mg17                                                                            | 1.0       | 87.4 (84.9)                |                                   | N/A                  | N/A                  | <u>Free</u>               | N/A                   | N/A                  | <b>Mg(0)</b> , Na(0)        |
| Mg18                                                                            | 1.0       | 86.2 (97.6)                |                                   | N/A                  | N/A                  | <u>Free</u>               | N/A                   | N/A                  | <b>Mg(0)</b> , Na(0)        |
| Mg19                                                                            | 1.0       | <u>71.4 (0.0)</u>          |                                   | N/A                  | N/A                  | <u>Free</u>               | N/A                   | N/A                  | <b>Mg(0)</b> , Na(0)        |
| Mg20                                                                            | 1.0       | 75.8 (76.9)                | <u>O<sub>2</sub></u>              | <u>0.8</u>           | <u>0.7</u>           | Octahedral                | 0.8°                  | <u>66%</u>           | Na(5), <b>Mg(3)</b>         |
| Mg21                                                                            | 1.0       | <u>98.2 (84.3)</u>         | <u>N<sub>1</sub></u>              | <u>0.03</u>          | <u>1.0</u>           | <u>Poorly Coordinated</u> | N/A                   | N/A                  | <b>Mg(0)</b> , Na(0)        |
| Mg22                                                                            | 1.0       | 108.7 (117.0)              | <u>O<sub>1</sub></u>              | <u>0.3</u>           | <u>1.0</u>           | <u>Poorly Coordinated</u> | N/A                   | N/A                  | Na(1), <b>Mg(0)</b>         |
| <b>holoES (pre-tRNA) in 5 mM Ca<sup>2+</sup>; PBD ID: 9OWT; EMDB: EMD-70943</b> |           |                            |                                   |                      |                      |                           |                       |                      |                             |
| Metal ID                                                                        | Occupancy | Bfactor(env.) <sup>1</sup> | Atomic contacts                   | Valence <sup>2</sup> | nVECSUM <sup>3</sup> | Geometry <sup>1,4</sup>   | gRMSD(°) <sup>1</sup> | Vacancy <sup>1</sup> | Ranking (Points)            |
| Ca1                                                                             | 1.0       | <u>70.8 (0.0)</u>          |                                   | N/A                  | N/A                  | <u>Free</u>               | N/A                   | N/A                  | <b>Ca(0)</b> , Na(0), Mg(0) |
| Ca2                                                                             | 1.0       | <u>96.1 (0.0)</u>          |                                   | N/A                  | N/A                  | <u>Free</u>               | N/A                   | N/A                  | <b>Ca(0)</b> , Na(0), Mg(0) |
| Ca3                                                                             | 1.0       | <u>72.3 (0.0)</u>          |                                   | N/A                  | N/A                  | <u>Free</u>               | N/A                   | N/A                  | <b>Ca(0)</b> , Na(0), Mg(0) |
| Ca4                                                                             | 1.0       | <u>70.9 (52.6)</u>         | <u>O<sub>1</sub></u>              | <u>0.09</u>          | <u>1.0</u>           | <u>Poorly Coordinated</u> | N/A                   | N/A                  | <b>Ca(0)</b> , Na(0), Mg(0) |
| Ca5 (MeB)                                                                       | 1.0       | 48.6 (45.5)                | O <sub>3</sub>                    | <u>1.0</u>           | <u>0.66</u>          | Octahedral                | 10.7°                 | <u>50%</u>           | Na(6), Mg(4), <b>Ca(4)</b>  |
| Ca6                                                                             | 1.0       | <u>69.4 (38.1)</u>         | <u>O<sub>1</sub></u>              | <u>0.08</u>          | <u>1.0</u>           | <u>Poorly Coordinated</u> | N/A                   | N/A                  | <b>Ca(0)</b> , Na(0), Mg(0) |
| Ca7 (MeC)                                                                       | 1.0       | <u>76.2 (57.7)</u>         | <u>O<sub>2</sub></u>              | <u>0.4</u>           | <u>0.81</u>          | Octahedral                | 1.6°                  | <u>66%</u>           | Na(3), Mg(3), <b>Ca(3)</b>  |
| Ca8                                                                             | 1.0       | <u>70.1 (46.9)</u>         | <u>O<sub>2</sub></u>              | <u>0.3</u>           | <u>0.78</u>          | Octahedral                | 13.1°                 | <u>66%</u>           | Na(3), Mg(3), <b>Ca(3)</b>  |

| Ca9                                                                             | 1.0       | <u>73.6 (43.6)</u>         |                               | N/A                  | N/A                  | <u>Free</u>                 | N/A                   | N/A                  | Ca(0), Na(0), Mg(0) |
|---------------------------------------------------------------------------------|-----------|----------------------------|-------------------------------|----------------------|----------------------|-----------------------------|-----------------------|----------------------|---------------------|
| Ca10                                                                            | 1.0       | <u>72.9 (49.0)</u>         | O <sub>2</sub>                | <u>0.11</u>          | <u>0.79</u>          | Octahedral                  | 9.7°                  | <u>66%</u>           | Ca(3), Na(3), Mg(3) |
| Ca11                                                                            | 1.0       | <u>83.1 (54.6)</u>         |                               | N/A                  | N/A                  | <u>Free</u>                 | N/A                   | N/A                  | Ca(0), Na(0), Mg(0) |
| Ca12                                                                            | 1.0       | <u>91.0 (62.4)</u>         |                               | N/A                  | N/A                  | <u>Free</u>                 | N/A                   | N/A                  | Ca(0), Na(0), Mg(0) |
| Ca13                                                                            | 1.0       | 54.7 (51.4)                | O <sub>3</sub>                | <u>1.2</u>           | <u>0.43</u>          | Octahedral                  | <u>19.1°</u>          | <u>50%</u>           | Na(6), Mg(4), Ca(4) |
| Ca14                                                                            | 1.0       | <u>86.8 (72.0)</u>         | O <sub>2</sub>                | <u>0.6</u>           | <u>0.76</u>          | Octahedral                  | 9.2°                  | <u>66%</u>           | Na(4), Mg(3), Ca(3) |
| Ca15                                                                            | 1.0       | <u>57.2 (39.7)</u>         | O <sub>2</sub>                | <u>0.3</u>           | <u>0.81</u>          | Octahedral                  | <u>16.3°</u>          | <u>66%</u>           | Na(3), Mg(3), Ca(3) |
| Ca16                                                                            | 1.0       | 78.7 (74.2)                | O <sub>1</sub>                | <u>0.3</u>           | <u>1.0</u>           | <u>Poorly Coordinated</u>   | N/A                   | N/A                  | Na(0), Mg(0), Ca(0) |
| Ca17                                                                            | 1.0       | 36.4 (36.0)                | O <sub>4</sub>                | <u>1.1</u>           | <u>0.46</u>          | <u>Tetrahedral</u>          | <u>34.6°</u>          | 0                    | Na(5), Mg(2), Ca(2) |
| Ca18                                                                            | 1.0       | <u>83.5 (67.0)</u>         | O <sub>2</sub>                | <u>0.6</u>           | <u>0.75</u>          | Octahedral                  | 7.9°                  | <u>66%</u>           | Na(4), Mg(3), Ca(3) |
| Ca19                                                                            | 1.0       | 57.0 (50.6)                | O <sub>3</sub>                | <u>0.7</u>           | <u>0.69</u>          | Octahedral                  | <u>14.7°</u>          | <u>50%</u>           | Na(5), Mg(4), Ca(4) |
| Ca20                                                                            | 1.0       | <b>81.7 (0.0)</b>          |                               | N/A                  | N/A                  | <u>Free</u>                 | N/A                   | N/A                  | Ca(0), Na(0), Mg(0) |
| Ca21                                                                            | 1.0       | 65.8 (63.6)                | O <sub>2</sub>                | <u>0.5</u>           | <u>0.66</u>          | <u>Tetrahedral</u>          | 7.1°                  | <u>50%</u>           | Na(2), Mg(1), Ca(1) |
| Ca22                                                                            | 1.0       | <u>87.3 (60.5)</u>         | N <sub>1</sub>                | <u>0.12</u>          | <u>1.0</u>           | <u>Poorly Coordinated</u>   | N/A                   | N/A                  | Ca(0), Na(0), Mg(0) |
| Ca23                                                                            | 1.0       | 97.5 (92.7)                | O <sub>2</sub>                | <u>0.6</u>           | <u>0.61</u>          | <u>Tetrahedral</u>          | 4.0°                  | <u>50%</u>           | Na(3), Mg(1), Ca(1) |
| Ca24                                                                            | 1.0       | 80.2 (74.5)                | O <sub>2</sub> N <sub>1</sub> | <u>0.3</u>           | <u>0.76</u>          | <u>Trigonal Bipyramidal</u> | <u>14.3°</u>          | <u>40%</u>           | Na(1), Mg(0), Ca(0) |
| Ca25                                                                            | 1.0       | 81.3 (72.5)                | O <sub>1</sub>                | <u>0.03</u>          | <u>1.0</u>           | <u>Poorly Coordinated</u>   | N/A                   | N/A                  | Ca(0), Na(0), Mg(0) |
| Ca26                                                                            | 1.0       | <u>70.2 (57.7)</u>         | O <sub>1</sub>                | <u>0.15</u>          | <u>1.0</u>           | <u>Poorly Coordinated</u>   | N/A                   | N/A                  | Ca(0), Na(0), Mg(0) |
| Ca27                                                                            | 1.0       | 66.6 (64.4)                | O <sub>3</sub> N <sub>1</sub> | <u>0.4</u>           | <u>0.7</u>           | Octahedral                  | <u>29.1°</u>          | <u>33%</u>           | Na(2), Mg(2), Ca(2) |
| Ca28                                                                            | 1.0       | <b>84.7 (45.1)</b>         | O <sub>1</sub>                | <u>0.04</u>          | <u>1.0</u>           | <u>Poorly Coordinated</u>   | N/A                   | N/A                  | Ca(0), Na(0), Mg(0) |
| Ca29                                                                            | 1.0       | <b>101.3 (0.0)</b>         |                               | N/A                  | N/A                  | <u>Free</u>                 | N/A                   | N/A                  | Ca(0), Na(0), Mg(0) |
| Ca30 (MeA)                                                                      | 1.0       | <u>51.8 (39.9)</u>         | O <sub>5</sub>                | 1.7                  | <u>0.24</u>          | Octahedral                  | <u>19.8°</u>          | <u>16%</u>           | Ca(6), Na(6), Mg(4) |
| Ca31                                                                            | 1.0       | <u>88.9 (60.5)</u>         |                               | N/A                  | N/A                  | <u>Free</u>                 | N/A                   | N/A                  | Ca(0), Na(0), Mg(0) |
| <b>holoES (pre-tRNA) in 1 mM Ca<sup>2+</sup>; PBD ID: 9OWU; EMDB: EMD-70944</b> |           |                            |                               |                      |                      |                             |                       |                      |                     |
| Metal ID                                                                        | Occupancy | Bfactor(env.) <sup>1</sup> | Atomic contacts               | Valence <sup>2</sup> | nVECSUM <sup>3</sup> | Geometry <sup>1,4</sup>     | gRMSD(°) <sup>1</sup> | Vacancy <sup>1</sup> | Ranking (Points)    |
| Ca1                                                                             | 1.0       | <b>102.2 (0.0)</b>         |                               | N/A                  | N/A                  | <u>Free</u>                 | N/A                   | N/A                  | Ca(0), Na(0), Mg(0) |
| Ca2                                                                             | 1.0       | <u>121.0 (95.3)</u>        | N <sub>1</sub>                | <u>0.03</u>          | <u>1.0</u>           | <u>Poorly Coordinated</u>   | N/A                   | N/A                  | Ca(0), Na(0), Mg(0) |

|                                                                                    |                  |                                  |                                   |                            |                            |                               |                             |                            |                         |
|------------------------------------------------------------------------------------|------------------|----------------------------------|-----------------------------------|----------------------------|----------------------------|-------------------------------|-----------------------------|----------------------------|-------------------------|
| Ca3                                                                                | 1.0              | <u>112.2 (0.0)</u>               |                                   | N/A                        | N/A                        | <u>Free</u>                   | N/A                         | N/A                        | Ca(0), Na(0), Mg(0)     |
| Ca4                                                                                | 1.0              | <u>118.0 (89.5)</u>              | <u>O<sub>1</sub></u>              | <u>0.05</u>                | <u>1.0</u>                 | <u>Poorly Coordinated</u>     | N/A                         | N/A                        | Ca(0), Na(0), Mg(0)     |
| Ca5 (MeB)                                                                          | 1.0              | 113.0 (97.2)                     | O <sub>3</sub>                    | <u>1.0</u>                 | <u>0.65</u>                | Octahedral                    | 9.6°                        | <u>50%</u>                 | Na(5), Mg(4), Ca(4)     |
| Ca6                                                                                | 1.0              | <u>100.5 (81.8)</u>              | <u>O<sub>1</sub></u>              | <u>0.07</u>                | <u>1.0</u>                 | <u>Poorly Coordinated</u>     | N/A                         | N/A                        | Ca(0), Na(0), Mg(0)     |
| Ca7 (MeC)                                                                          | 1.0              | <u>130.4 (108.5)</u>             | <u>O<sub>1</sub></u>              | <u>0.3</u>                 | <u>1.0</u>                 | <u>Poorly Coordinated</u>     | N/A                         | N/A                        | Na(0), Mg(0), Ca(0)     |
| Ca8                                                                                | 1.0              | <u>97.6 (83.9)</u>               | <u>O<sub>1</sub></u>              | <u>0.3</u>                 | <u>1.0</u>                 | <u>Poorly Coordinated</u>     | N/A                         | N/A                        | Na(0), Mg(0), Ca(0)     |
| Ca9                                                                                | 1.0              | <u>105.8 (75.3)</u>              | <u>O<sub>1</sub></u>              | <u>0.03</u>                | <u>1.0</u>                 | <u>Poorly Coordinated</u>     | N/A                         | N/A                        | Ca(0), Na(0), Mg(0)     |
| Ca10                                                                               | 1.0              | 95.3 (82.6)                      | O <sub>4</sub>                    | <u>0.2</u>                 | <u>0.59</u>                | Octahedral                    | <u>14.5°</u>                | <u>33%</u>                 | Na(4), Mg(4), Ca(4)     |
| Ca11                                                                               | 1.0              | 111.9 (116.1)                    | <u>O<sub>1</sub></u>              | <u>0.07</u>                | <u>1.0</u>                 | <u>Poorly Coordinated</u>     | N/A                         | N/A                        | Ca(0), Na(0), Mg(0)     |
| Ca12                                                                               | 1.0              | 125.9 (116.4)                    |                                   | N/A                        | N/A                        | <u>Free</u>                   | N/A                         | N/A                        | Ca(0), Na(0), Mg(0)     |
| Ca13                                                                               | 1.0              | 112.2 (110.2)                    | O <sub>3</sub>                    | <u>1.0</u>                 | <u>0.48</u>                | Octahedral                    | <u>23.2°</u>                | <u>50%</u>                 | Na(6), Mg(4), Ca(4)     |
| Ca14                                                                               | 1.0              | 115.1 (107.3)                    | <u>O<sub>2</sub></u>              | <u>0.5</u>                 | <u>0.8</u>                 | Octahedral                    | 13.3°                       | <u>66%</u>                 | Na(3), Mg(3), Ca(3)     |
| Ca15                                                                               | 1.0              | <u>102.5 (78.2)</u>              | O <sub>3</sub>                    | <u>0.19</u>                | <u>0.63</u>                | Octahedral                    | <u>24.2°</u>                | <u>50%</u>                 | Ca(4), Na(4), Mg(4)     |
| Ca16                                                                               | 1.0              | 63.2 (71.2)                      | O <sub>4</sub>                    | <u>1.3</u>                 | <u>0.37</u>                | Octahedral                    | <u>14.8°</u>                | <u>33%</u>                 | Na(6), Ca(5), Mg(4)     |
| Ca17                                                                               | 1.0              | 118.2 (119.0)                    | <u>O<sub>2</sub></u>              | <u>0.5</u>                 | <u>0.83</u>                | Octahedral                    | <u>18.2°</u>                | <u>66%</u>                 | Na(3), Mg(3), Ca(3)     |
| Ca18                                                                               | 1.0              | 87.5 (85.1)                      | <u>O<sub>2</sub></u>              | <u>0.6</u>                 | <u>0.78</u>                | Octahedral                    | 12.5°                       | <u>66%</u>                 | Na(4), Mg(3), Ca(3)     |
| Ca19                                                                               | 1.0              | <u>123.4 (0.0)</u>               |                                   | N/A                        | N/A                        | <u>Free</u>                   | N/A                         | N/A                        | Ca(0), Na(0), Mg(0)     |
| Ca20                                                                               | 1.0              | 140.2 (142.1)                    | <u>O<sub>1</sub></u>              | <u>0.3</u>                 | <u>1.0</u>                 | <u>Poorly Coordinated</u>     | N/A                         | N/A                        | Na(0), Mg(0), Ca(0)     |
| Ca21                                                                               | 1.0              | <u>130.9 (106.6)</u>             | <u>N<sub>1</sub></u>              | <u>0.4</u>                 | <u>1.0</u>                 | <u>Poorly Coordinated</u>     | N/A                         | N/A                        | Na(0), Mg(0), Ca(0)     |
| Ca22                                                                               | 1.0              | <u>101.7 (119.8)</u>             | <u>O<sub>2</sub>N<sub>1</sub></u> | <u>0.15</u>                | <u>0.61</u>                | <u>Trigonal Bipyramidal</u>   | <u>16.0°</u>                | <u>40%</u>                 | Na(1), Mg(0), Ca(0)     |
| Ca23                                                                               | 1.0              | <u>124.2 (105.3)</u>             |                                   | N/A                        | N/A                        | <u>Free</u>                   | N/A                         | N/A                        | Ca(0), Na(0), Mg(0)     |
| Ca24                                                                               | 1.0              | 104.5 (93.2)                     | <u>O<sub>1</sub></u>              | <u>0.3</u>                 | <u>1.0</u>                 | <u>Poorly Coordinated</u>     | N/A                         | N/A                        | Na(0), Mg(0), Ca(0)     |
| Ca25                                                                               | 1.0              | <u>123.6 (0.0)</u>               |                                   | N/A                        | N/A                        | <u>Free</u>                   | N/A                         | N/A                        | Ca(0), Na(0), Mg(0)     |
| Ca26 (MeA)                                                                         | 1.0              | 99.2 (93.0)                      | O <sub>5</sub>                    | <u>1.2</u>                 | <u>0.25</u>                | <u>Tetrahedral</u>            | 8.2°                        | <u>25%</u>                 | Na(5), Mg(2), Ca(2)     |
| <b>holoES (nc-pre-tRNA) in 5 mM Ca<sup>2+</sup>; PBD ID: 9OWW; EMDB: EMD-70946</b> |                  |                                  |                                   |                            |                            |                               |                             |                            |                         |
| <b>Metal ID</b>                                                                    | <b>Occupancy</b> | <b>Bfactor(env.)<sup>1</sup></b> | <b>Atomic contacts</b>            | <b>Valence<sup>2</sup></b> | <b>nVECSUM<sup>3</sup></b> | <b>Geometry<sup>1,4</sup></b> | <b>gRMSD(°)<sup>1</sup></b> | <b>Vacancy<sup>1</sup></b> | <b>Ranking (Points)</b> |
| Ca1                                                                                | 1.0              | <u>85.4 (71.1)</u>               |                                   | N/A                        | N/A                        | <u>Free</u>                   | N/A                         | N/A                        | Ca(0), Na(0), Mg(0)     |

|           |     |                     |                                   |             |             |                             |              |            |                     |
|-----------|-----|---------------------|-----------------------------------|-------------|-------------|-----------------------------|--------------|------------|---------------------|
| Ca2       | 1.0 | <u>106.7 (89.5)</u> |                                   | N/A         | N/A         | <u>Free</u>                 | N/A          | N/A        | Ca(0), Na(0), Mg(0) |
| Ca3       | 1.0 | <b>99.0 (0.0)</b>   |                                   | N/A         | N/A         | <u>Free</u>                 | N/A          | N/A        | Ca(0), Na(0), Mg(0) |
| Ca4       | 1.0 | <u>94.3 (76.1)</u>  | <u>O<sub>1</sub></u>              | <b>0.11</b> | <b>1.0</b>  | <u>Poorly Coordinated</u>   | N/A          | N/A        | Ca(0), Na(0), Mg(0) |
| Ca5 (MeB) | 1.0 | 71.6 (69.4)         | O <sub>3</sub>                    | <b>0.9</b>  | <b>0.65</b> | Octahedral                  | 11.4°        | <b>50%</b> | Na(5), Mg(4), Ca(4) |
| Ca6       | 1.0 | <u>96.5 (60.0)</u>  | <u>O<sub>1</sub></u>              | <b>0.04</b> | <b>1.0</b>  | <u>Poorly Coordinated</u>   | N/A          | N/A        | Ca(0), Na(0), Mg(0) |
| Ca7 (MeC) | 1.0 | <u>99.4 (76.2)</u>  | <u>O<sub>2</sub></u>              | <b>0.3</b>  | <b>0.7</b>  | Octahedral                  | 6.5°         | <b>66%</b> | Na(3), Mg(3), Ca(3) |
| Ca8       | 1.0 | <u>110.6 (72.6)</u> | <u>O<sub>2</sub></u>              | <b>0.3</b>  | <b>0.8</b>  | Octahedral                  | <u>14.6°</u> | <b>66%</b> | Na(3), Mg(3), Ca(3) |
| Ca9       | 1.0 | <u>109.6 (68.4)</u> | <u>O<sub>1</sub></u>              | <b>0.03</b> | <b>1.0</b>  | <u>Poorly Coordinated</u>   | N/A          | N/A        | Ca(0), Na(0), Mg(0) |
| Ca10      | 1.0 | <u>86.1 (70.0)</u>  | O <sub>3</sub>                    | <b>0.13</b> | <b>0.7</b>  | Octahedral                  | <u>16.3°</u> | <b>50%</b> | Ca(4), Na(4), Mg(4) |
| Ca11      | 1.0 | 97.8 (95.4)         | <u>O<sub>1</sub></u>              | <b>0.04</b> | <b>1.0</b>  | <u>Poorly Coordinated</u>   | N/A          | N/A        | Ca(0), Na(0), Mg(0) |
| Ca12      | 1.0 | <u>107.9 (73.5)</u> |                                   | N/A         | N/A         | <u>Free</u>                 | N/A          | N/A        | Ca(0), Na(0), Mg(0) |
| Ca13      | 1.0 | 77.2 (78.6)         | O <sub>3</sub>                    | <b>1.2</b>  | <b>0.4</b>  | Octahedral                  | <u>15.2°</u> | <b>50%</b> | Na(6), Mg(4), Ca(4) |
| Ca14      | 1.0 | 113.4 (98.7)        | <u>O<sub>2</sub></u>              | <b>0.6</b>  | <b>0.8</b>  | Octahedral                  | <u>16.2°</u> | <b>66%</b> | Na(4), Mg(3), Ca(3) |
| Ca15      | 1.0 | <u>89.5 (62.0)</u>  | <u>O<sub>2</sub></u>              | <b>0.2</b>  | <b>0.82</b> | Octahedral                  | <u>19.4°</u> | <b>66%</b> | Ca(3), Na(3), Mg(3) |
| Ca16      | 1.0 | 56.0 (60.9)         | O <sub>4</sub>                    | <b>1.2</b>  | <b>0.44</b> | Octahedral                  | <u>21.5°</u> | <b>33%</b> | Na(6), Mg(4), Ca(4) |
| Ca17      | 1.0 | 105.6 (94.2)        | <u>O<sub>2</sub></u>              | <b>0.6</b>  | <b>0.78</b> | Octahedral                  | 13.4°        | <b>66%</b> | Na(4), Mg(3), Ca(3) |
| Ca18      | 1.0 | 79.7 (78.4)         | O <sub>4</sub>                    | <b>0.8</b>  | <b>0.49</b> | Octahedral                  | 10.3°        | <b>66%</b> | Na(5), Mg(4), Ca(4) |
| Ca19      | 1.0 | <b>100.6 (0.0)</b>  |                                   | N/A         | N/A         | <u>Free</u>                 | N/A          | N/A        | Ca(0), Na(0), Mg(0) |
| Ca20      | 1.0 | 91.3 (90.7)         | <u>O<sub>2</sub></u>              | <b>0.4</b>  | <b>0.71</b> | Octahedral                  | 9.2°         | <b>66%</b> | Na(3), Mg(3), Ca(3) |
| Ca21      | 1.0 | <u>117.9 (94.9)</u> | <u>N<sub>1</sub></u>              | <b>0.06</b> | <b>1.0</b>  | <u>Poorly Coordinated</u>   | N/A          | N/A        | Ca(0), Na(0), Mg(0) |
| Ca22      | 1.0 | 125.0 (117.1)       | O <sub>3</sub>                    | <b>0.17</b> | <b>0.31</b> | <u>Tetrahedral</u>          | <u>29.2°</u> | <u>25%</u> | Na(3), Mg(2), Ca(2) |
| Ca23      | 1.0 | 95.9 (111.3)        | <u>O<sub>2</sub>N<sub>1</sub></u> | <b>0.7</b>  | <b>0.5</b>  | <u>Trigonal Bipyramidal</u> | 11.5°        | <b>40%</b> | Na(4), Mg(2), Ca(0) |
| Ca24      | 1.0 | 104.3 (95.8)        |                                   | N/A         | N/A         | <u>Free</u>                 | N/A          | N/A        | Ca(0), Na(0), Mg(0) |
| Ca25      | 1.0 | <u>94.8 (78.8)</u>  | <u>O<sub>1</sub></u>              | <b>0.08</b> | <b>1.0</b>  | <u>Poorly Coordinated</u>   | N/A          | N/A        | Ca(0), Na(0), Mg(0) |
| Ca26      | 1.0 | <b>119.5 (0.0)</b>  |                                   | N/A         | N/A         | <u>Free</u>                 | N/A          | N/A        | Ca(0), Na(0), Mg(0) |
| Ca27      | 1.0 | <u>97.6 (78.3)</u>  | <u>O<sub>1</sub></u>              | <b>0.18</b> | <b>1.0</b>  | <u>Poorly Coordinated</u>   | N/A          | N/A        | Ca(0), Na(0), Mg(0) |
| Ca28      | 1.0 | <b>120.3 (0.0)</b>  |                                   | N/A         | N/A         | <u>Free</u>                 | N/A          | N/A        | Ca(0), Na(0), Mg(0) |

| Ca29                                                                                     | 1.0       | 104.7 (96.5)               | <u>O<sub>4</sub>N<sub>1</sub></u> | <u>0.9</u>           | <u>0.34</u>          | Octahedral                  | <u>27.4°</u>          | <u>16%</u>           | Na(3), Mg(2), <b>Ca(2)</b>  |
|------------------------------------------------------------------------------------------|-----------|----------------------------|-----------------------------------|----------------------|----------------------|-----------------------------|-----------------------|----------------------|-----------------------------|
| Ca30 (MeA)                                                                               | 1.0       | 62.3 (61.4)                | O <sub>5</sub>                    | 1.7                  | <u>0.24</u>          | Octahedral                  | <u>18.9°</u>          | <u>16%</u>           | <b>Ca(6)</b> , Na(6), Mg(4) |
| <b>holoES (LB-pre-tRNA-tilt1) in 5 mM Ca<sup>2+</sup>; PBD ID: 9OWX; EMDB: EMD-70947</b> |           |                            |                                   |                      |                      |                             |                       |                      |                             |
| Metal ID                                                                                 | Occupancy | Bfactor(env.) <sup>1</sup> | Atomic contacts                   | Valence <sup>2</sup> | nVECSUM <sup>3</sup> | Geometry <sup>1,4</sup>     | gRMSD(°) <sup>1</sup> | Vacancy <sup>1</sup> | Ranking (Points)            |
| Ca1                                                                                      | 1.0       | <u>60.9 (0.0)</u>          |                                   | N/A                  | N/A                  | <u>Free</u>                 | N/A                   | N/A                  | <b>Ca(0)</b> , Na(0), Mg(0) |
| Ca2                                                                                      | 1.0       | <u>79.8 (0.0)</u>          |                                   | N/A                  | N/A                  | <u>Free</u>                 | N/A                   | N/A                  | <b>Ca(0)</b> , Na(0), Mg(0) |
| Ca3                                                                                      | 1.0       | <u>60.8 (23.0)</u>         |                                   | N/A                  | N/A                  | <u>Free</u>                 | N/A                   | N/A                  | <b>Ca(0)</b> , Na(0), Mg(0) |
| Ca4                                                                                      | 1.0       | <u>65.5 (44.9)</u>         | <u>O<sub>1</sub></u>              | <u>0.08</u>          | <u>1.0</u>           | <u>Poorly Coordinated</u>   | N/A                   | N/A                  | <b>Ca(0)</b> , Na(0), Mg(0) |
| Ca5 (MeB)                                                                                | 1.0       | <u>41.4 (35.4)</u>         | O <sub>3</sub>                    | <u>1.0</u>           | <u>0.65</u>          | Octahedral                  | 12.3°                 | <u>50%</u>           | Na(5), Mg(4), <b>Ca(4)</b>  |
| Ca6                                                                                      | 1.0       | <u>51.4 (31.6)</u>         |                                   | N/A                  | N/A                  | <u>Free</u>                 | N/A                   | N/A                  | <b>Ca(0)</b> , Na(0), Mg(0) |
| Ca7 (MeC)                                                                                | 1.0       | <u>59.6 (42.5)</u>         | <u>O<sub>2</sub></u>              | <u>0.5</u>           | <u>0.72</u>          | Octahedral                  | 3.0°                  | <u>66%</u>           | Na(3), Mg(3), <b>Ca(3)</b>  |
| Ca8                                                                                      | 1.0       | <u>75.1 (30.4)</u>         | <u>O<sub>2</sub></u>              | <u>0.2</u>           | <u>0.81</u>          | Octahedral                  | <u>17.2°</u>          | <u>66%</u>           | Na(3), Mg(3), <b>Ca(3)</b>  |
| Ca9                                                                                      | 1.0       | <u>70.5 (31.1)</u>         | <u>O<sub>1</sub></u>              | <u>0.06</u>          | <u>1.0</u>           | <u>Poorly Coordinated</u>   | N/A                   | N/A                  | <b>Ca(0)</b> , Na(0), Mg(0) |
| Ca10                                                                                     | 1.0       | <u>64.6 (38.4)</u>         | <u>O<sub>1</sub></u>              | <u>0.05</u>          | <u>1.0</u>           | <u>Poorly Coordinated</u>   | N/A                   | N/A                  | <b>Ca(0)</b> , Na(0), Mg(0) |
| Ca11                                                                                     | 1.0       | 68.5 (64.7)                | <u>O<sub>1</sub></u>              | <u>0.03</u>          | <u>1.0</u>           | <u>Poorly Coordinated</u>   | N/A                   | N/A                  | <b>Ca(0)</b> , Na(0), Mg(0) |
| Ca12                                                                                     | 1.0       | <u>77.0 (0.0)</u>          |                                   | N/A                  | N/A                  | <u>Free</u>                 | N/A                   | N/A                  | <b>Ca(0)</b> , Na(0), Mg(0) |
| Ca13                                                                                     | 1.0       | 48.3 (43.2)                | O <sub>3</sub>                    | <u>1.1</u>           | <u>0.41</u>          | Octahedral                  | <u>15.7°</u>          | <u>50%</u>           | Na(6), Mg(4), <b>Ca(4)</b>  |
| Ca14                                                                                     | 1.0       | <u>72.0 (57.8)</u>         | <u>O<sub>2</sub></u>              | <u>0.5</u>           | <u>0.75</u>          | Octahedral                  | 2.2°                  | <u>66%</u>           | Na(3), Mg(3), <b>Ca(3)</b>  |
| Ca15                                                                                     | 1.0       | <u>51.0 (33.1)</u>         | <u>O<sub>2</sub></u>              | <u>0.3</u>           | <u>0.81</u>          | Octahedral                  | <u>17.8°</u>          | <u>66%</u>           | Na(3), Mg(3), <b>Ca(3)</b>  |
| Ca16                                                                                     | 1.0       | 29.0 (28.3)                | O <sub>4</sub>                    | <u>1.4</u>           | <u>0.34</u>          | Octahedral                  | 9.7°                  | <u>33%</u>           | Na(6), <b>Ca(5)</b> , Mg(4) |
| Ca17                                                                                     | 1.0       | <u>74.4 (52.7)</u>         | <u>O<sub>2</sub></u>              | <u>0.5</u>           | <u>0.79</u>          | Octahedral                  | 10.8°                 | <u>66%</u>           | Na(3), Mg(3), <b>Ca(3)</b>  |
| Ca18                                                                                     | 1.0       | 47.5 (41.7)                | O <sub>4</sub>                    | <u>0.8</u>           | <u>0.55</u>          | Octahedral                  | 13.4°                 | <u>66%</u>           | Na(5), Mg(4), <b>Ca(4)</b>  |
| Ca19                                                                                     | 1.0       | <u>85.3 (33.2)</u>         |                                   | N/A                  | N/A                  | <u>Free</u>                 | N/A                   | N/A                  | <b>Ca(0)</b> , Na(0), Mg(0) |
| Ca20                                                                                     | 1.0       | <u>65.7 (55.3)</u>         | <u>O<sub>2</sub></u>              | <u>0.5</u>           | <u>0.61</u>          | <u>Tetrahedral</u>          | 1.0°                  | <u>50%</u>           | Na(2), Mg(1), <b>Ca(1)</b>  |
| Ca21                                                                                     | 1.0       | <u>76.5 (56.5)</u>         | <u>O<sub>1</sub></u>              | <u>0.1</u>           | <u>1.0</u>           | <u>Poorly Coordinated</u>   | N/A                   | N/A                  | <b>Ca(0)</b> , Na(0), Mg(0) |
| Ca22                                                                                     | 1.0       | 64.9 (65.3)                | <u>O<sub>2</sub>N<sub>1</sub></u> | <u>0.5</u>           | <u>0.6</u>           | <u>Trigonal Bipyramidal</u> | 10.0°                 | <u>40%</u>           | Na(3), Mg(2), <b>Ca(0)</b>  |
| Ca23                                                                                     | 1.0       | <u>78.8 (54.4)</u>         |                                   | N/A                  | N/A                  | <u>Free</u>                 | N/A                   | N/A                  | <b>Ca(0)</b> , Na(0), Mg(0) |

| Ca24                                                                                    | 1.0       | <u>65.9 (38.9)</u>         | <u>O<sub>1</sub></u>              | <u>0.2</u>           | <u>1.0</u>           | <u>Poorly Coordinated</u> | N/A                   | N/A                  | Ca(0), Na(0), Mg(0) |
|-----------------------------------------------------------------------------------------|-----------|----------------------------|-----------------------------------|----------------------|----------------------|---------------------------|-----------------------|----------------------|---------------------|
| Ca25                                                                                    | 1.0       | <u>92.8 (0.0)</u>          |                                   | N/A                  | N/A                  | <u>Free</u>               | N/A                   | N/A                  | Ca(0), Na(0), Mg(0) |
| Ca26                                                                                    | 1.0       | 56.2 (54.6)                | <u>O<sub>3</sub>N<sub>1</sub></u> | <u>0.6</u>           | <u>0.16</u>          | Octahedral                | <u>29.1°</u>          | <u>33%</u>           | Na(4), Mg(4), Ca(2) |
| Ca27                                                                                    | 1.0       | 61.3 (60.5)                | O <sub>3</sub>                    | <u>0.8</u>           | <u>0.6</u>           | Octahedral                | <u>20.8°</u>          | <u>50%</u>           | Na(5), Mg(4), Ca(4) |
| Ca28 (MeA)                                                                              | 1.0       | <u>48.0 (31.9)</u>         | O <sub>5</sub>                    | <u>1.4</u>           | <u>0.24</u>          | Octahedral                | <u>21.9°</u>          | <u>16%</u>           | Na(6), Ca(5), Mg(4) |
| <b>holoES (LB-pre-tRNA-tilt2) in 5 mM Ca<sup>2+</sup>; PBD ID: 9OWY; EMD: EMD-70948</b> |           |                            |                                   |                      |                      |                           |                       |                      |                     |
| Metal ID                                                                                | Occupancy | Bfactor(env.) <sup>1</sup> | Atomic contacts                   | Valence <sup>2</sup> | nVECSUM <sup>3</sup> | Geometry <sup>1,4</sup>   | gRMSD(°) <sup>1</sup> | Vacancy <sup>1</sup> | Ranking (Points)    |
| Ca1                                                                                     | 1.0       | <u>78.0 (53.1)</u>         |                                   | N/A                  | N/A                  | <u>Free</u>               | N/A                   | N/A                  | Ca(0), Na(0), Mg(0) |
| Ca2                                                                                     | 1.0       | <u>86.1 (0.0)</u>          |                                   | N/A                  | N/A                  | <u>Free</u>               | N/A                   | N/A                  | Ca(0), Na(0), Mg(0) |
| Ca3                                                                                     | 1.0       | <u>80.1 (43.1)</u>         |                                   | N/A                  | N/A                  | <u>Free</u>               | N/A                   | N/A                  | Ca(0), Na(0), Mg(0) |
| Ca4                                                                                     | 1.0       | <u>74.6 (61.3)</u>         | <u>O<sub>1</sub></u>              | <u>0.07</u>          | <u>1.0</u>           | <u>Poorly Coordinated</u> | N/A                   | N/A                  | Ca(0), Na(0), Mg(0) |
| Ca5 (MeB)                                                                               | 1.0       | 56.1 (55.5)                | O <sub>3</sub>                    | <u>1.1</u>           | <u>0.64</u>          | Octahedral                | 12.2°                 | <u>50%</u>           | Na(6), Mg(4), Ca(4) |
| Ca6                                                                                     | 1.0       | <u>78.6 (51.7)</u>         | <u>O<sub>1</sub></u>              | <u>0.03</u>          | <u>1.0</u>           | <u>Poorly Coordinated</u> | N/A                   | N/A                  | Ca(0), Na(0), Mg(0) |
| Ca7 (MeC)                                                                               | 1.0       | <u>76.4 (62.6)</u>         | <u>O<sub>2</sub></u>              | <u>0.5</u>           | <u>0.69</u>          | Octahedral                | 5.7°                  | <u>66%</u>           | Na(4), Mg(3), Ca(3) |
| Ca8                                                                                     | 1.0       | <u>85.3 (43.2)</u>         | <u>O<sub>2</sub></u>              | <u>0.2</u>           | <u>0.87</u>          | Octahedral                | <u>22.2°</u>          | <u>66%</u>           | Ca(3), Na(3), Mg(3) |
| Ca9                                                                                     | 1.0       | <u>82.3 (49.9)</u>         | <u>O<sub>1</sub></u>              | <u>0.07</u>          | <u>1.0</u>           | <u>Poorly Coordinated</u> | N/A                   | N/A                  | Ca(0), Na(0), Mg(0) |
| Ca10                                                                                    | 1.0       | <u>88.6 (70.2)</u>         |                                   | N/A                  | N/A                  | <u>Free</u>               | N/A                   | N/A                  | Ca(0), Na(0), Mg(0) |
| Ca11                                                                                    | 1.0       | <u>83.8 (0.0)</u>          |                                   | N/A                  | N/A                  | <u>Free</u>               | N/A                   | N/A                  | Ca(0), Na(0), Mg(0) |
| Ca12                                                                                    | 1.0       | 58.6 (61.0)                | O <sub>3</sub>                    | <u>1.1</u>           | <u>0.39</u>          | Octahedral                | <u>16.5°</u>          | <u>50%</u>           | Na(6), Mg(4), Ca(4) |
| Ca13                                                                                    | 1.0       | <u>87.7 (72.8)</u>         | <u>O<sub>2</sub></u>              | <u>0.3</u>           | <u>0.82</u>          | Octahedral                | <u>18.7°</u>          | <u>66%</u>           | Na(3), Mg(3), Ca(3) |
| Ca14                                                                                    | 1.0       | <u>69.8 (51.7)</u>         | <u>O<sub>2</sub></u>              | <u>0.3</u>           | <u>0.84</u>          | Octahedral                | <u>18.1°</u>          | <u>66%</u>           | Na(3), Mg(3), Ca(3) |
| Ca15                                                                                    | 1.0       | 45.3 (48.6)                | O <sub>4</sub>                    | <u>1.3</u>           | <u>0.42</u>          | Octahedral                | <u>14.6°</u>          | <u>33%</u>           | Na(6), Ca(5), Mg(4) |
| Ca16                                                                                    | 1.0       | <u>85.5 (69.6)</u>         | <u>O<sub>2</sub></u>              | <u>0.5</u>           | <u>0.76</u>          | Octahedral                | 7.6°                  | <u>66%</u>           | Na(3), Mg(3), Ca(3) |
| Ca17                                                                                    | 1.0       | 61.5 (64.0)                | O <sub>4</sub>                    | <u>0.8</u>           | <u>0.53</u>          | Octahedral                | 13.3°                 | <u>66%</u>           | Na(5), Mg(4), Ca(4) |
| Ca18                                                                                    | 1.0       | <u>92.8 (59.3)</u>         |                                   | N/A                  | N/A                  | <u>Free</u>               | N/A                   | N/A                  | Ca(0), Na(0), Mg(0) |
| Ca19                                                                                    | 1.0       | 76.3 (72.2)                | <u>O<sub>2</sub></u>              | <u>0.4</u>           | <u>0.73</u>          | <u>Tetrahedral</u>        | 6.1°                  | <u>50%</u>           | Na(2), Mg(1), Ca(1) |
| Ca20                                                                                    | 1.0       | <u>99.4 (64.9)</u>         | <u>N<sub>1</sub></u>              | <u>0.14</u>          | <u>1.0</u>           | <u>Poorly Coordinated</u> | N/A                   | N/A                  | Ca(0), Na(0), Mg(0) |

| Ca21                                                                            | 1.0       | 101.9 (98.6)               | O <sub>2</sub>                | <u>0.6</u>           | <u>0.55</u>          | <u>Tetrahedral</u>          | 4.3°                  | <u>50%</u>           | Na(3), Mg(1), Ca(1) |
|---------------------------------------------------------------------------------|-----------|----------------------------|-------------------------------|----------------------|----------------------|-----------------------------|-----------------------|----------------------|---------------------|
| Ca22                                                                            | 1.0       | 79.3 (83.9)                | O <sub>2</sub> N <sub>1</sub> | <u>0.6</u>           | <u>0.61</u>          | <u>Trigonal Bipyramidal</u> | 10.5°                 | <u>40%</u>           | Na(2), Mg(0), Ca(0) |
| Ca23                                                                            | 1.0       | <u>87.2 (0.0)</u>          |                               | N/A                  | N/A                  | <u>Free</u>                 | N/A                   | N/A                  | Ca(0), Na(0), Mg(0) |
| Ca24                                                                            | 1.0       | <u>76.0 (59.3)</u>         | O <sub>1</sub>                | <u>0.3</u>           | <u>1.0</u>           | <u>Poorly Coordinated</u>   | N/A                   | N/A                  | Na(0), Mg(0), Ca(0) |
| Ca25                                                                            | 1.0       | <u>107.8 (0.0)</u>         |                               | N/A                  | N/A                  | <u>Free</u>                 | N/A                   | N/A                  | Ca(0), Na(0), Mg(0) |
| Ca26                                                                            | 1.0       | 103.6 (90.7)               | O <sub>2</sub>                | <u>0.7</u>           | <u>0.29</u>          | <u>Linear</u>               | <u>33.8°</u>          | 0                    | Na(2), Mg(1), Ca(1) |
| Ca27                                                                            | 1.0       | 95.5 (91.3)                | O <sub>2</sub>                | <u>0.4</u>           | <u>0.72</u>          | <u>Tetrahedral</u>          | 0.7°                  | <u>50%</u>           | Na(2), Mg(1), Ca(1) |
| Ca28                                                                            | 1.0       | 76.3 (70.7)                | O <sub>3</sub> N <sub>1</sub> | <u>0.5</u>           | <u>0.37</u>          | Octahedral                  | <u>30.2°</u>          | <u>33%</u>           | Na(2), Mg(2), Ca(2) |
| Ca29                                                                            | 1.0       | 77.9 (77.1)                | O <sub>3</sub>                | <u>0.8</u>           | <u>0.6</u>           | Octahedral                  | <u>21.6°</u>          | <u>50%</u>           | Na(5), Mg(4), Ca(4) |
| Ca30                                                                            | 1.0       | <u>93.2 (0.0)</u>          |                               | N/A                  | N/A                  | <u>Free</u>                 | N/A                   | N/A                  | Ca(0), Na(0), Mg(0) |
| Ca31 (MeA)                                                                      | 1.0       | <u>66.6 (52.7)</u>         | O <sub>5</sub>                | <u>1.4</u>           | <u>0.23</u>          | Octahedral                  | <u>20.7°</u>          | <u>16%</u>           | Na(6), Ca(5), Mg(4) |
| <b>holoEP (mat-tRNA) in 5 mM Ca<sup>2+</sup>; PBD ID: 9OWV; EMDB: EMD-70945</b> |           |                            |                               |                      |                      |                             |                       |                      |                     |
| Metal ID                                                                        | Occupancy | Bfactor(env.) <sup>1</sup> | Atomic contacts               | Valence <sup>2</sup> | nVECSUM <sup>3</sup> | Geometry <sup>1,4</sup>     | gRMSD(°) <sup>1</sup> | Vacancy <sup>1</sup> | Ranking (Points)    |
| Ca1                                                                             | 1.0       | <u>80.0 (0.0)</u>          |                               | N/A                  | N/A                  | <u>Free</u>                 | N/A                   | N/A                  | Ca(0), Na(0), Mg(0) |
| Ca2                                                                             | 1.0       | <u>117.5 (0.0)</u>         |                               | N/A                  | N/A                  | <u>Free</u>                 | N/A                   | N/A                  | Ca(0), Na(0), Mg(0) |
| Ca3                                                                             | 1.0       | 87.7 (76.3)                | O <sub>1</sub>                | <u>0.04</u>          | <u>1.0</u>           | <u>Poorly Coordinated</u>   | N/A                   | N/A                  | Ca(0), Na(0), Mg(0) |
| Ca4 (MeA)                                                                       | 1.0       | 66.4 (67.4)                | O <sub>5</sub>                | <u>1.5</u>           | <u>0.17</u>          | <u>Tetrahedral</u>          | 11.6°                 | <u>25%</u>           | Na(5), Ca(3), Mg(2) |
| Ca5                                                                             | 1.0       | <u>93.7 (70.5)</u>         | O <sub>2</sub>                | <u>0.3</u>           | <u>0.94</u>          | Octahedral                  | <u>17.2°</u>          | <u>66%</u>           | Na(3), Mg(3), Ca(3) |
| Ca6                                                                             | 1.0       | 82.1 (79.5)                |                               | N/A                  | N/A                  | <u>Free</u>                 | N/A                   | N/A                  | Ca(0), Na(0), Mg(0) |
| Ca7                                                                             | 1.0       | 89.3 (82.3)                |                               | N/A                  | N/A                  | <u>Free</u>                 | N/A                   | N/A                  | Ca(0), Na(0), Mg(0) |
| Ca8                                                                             | 1.0       | 67.6 (71.9)                | O <sub>3</sub>                | <u>1.0</u>           | <u>0.31</u>          | Octahedral                  | <u>21.8°</u>          | <u>50%</u>           | Na(6), Mg(4), Ca(4) |
| Ca9                                                                             | 1.0       | 96.7 (91.1)                | O <sub>2</sub>                | <u>0.7</u>           | <u>0.73</u>          | Octahedral                  | 3.1°                  | <u>66%</u>           | Na(4), Mg(3), Ca(3) |
| Ca10                                                                            | 1.0       | 55.7 (58.7)                | O <sub>2</sub>                | <u>0.3</u>           | <u>0.82</u>          | Octahedral                  | <u>20.3°</u>          | <u>66%</u>           | Na(3), Mg(3), Ca(3) |
| Ca11                                                                            | 1.0       | <u>109.7 (90.3)</u>        | O <sub>1</sub>                | <u>0.2</u>           | <u>1.0</u>           | <u>Poorly Coordinated</u>   | N/A                   | N/A                  | Ca(0), Na(0), Mg(0) |
| Ca12                                                                            | 1.0       | 88.9 (95.7)                | O <sub>3</sub>                | <u>0.6</u>           | <u>0.71</u>          | Octahedral                  | <u>20.0°</u>          | <u>50%</u>           | Na(5), Mg(4), Ca(4) |
| Ca13                                                                            | 1.0       | 59.1 (63.2)                | O <sub>4</sub>                | <u>1.4</u>           | <u>0.34</u>          | Octahedral                  | <u>14.3°</u>          | <u>33%</u>           | Na(6), Ca(5), Mg(4) |
| Ca14                                                                            | 1.0       | 90.8 (88.8)                | O <sub>2</sub>                | <u>0.7</u>           | <u>0.78</u>          | Octahedral                  | 11.6°                 | <u>66%</u>           | Na(4), Mg(3), Ca(3) |

| Ca15                                                                                | 1.0       | 69.6 (71.7)                | O <sub>4</sub>                    | <b>0.8</b>           | <b>0.48</b>          | Octahedral                  | 9.6°                  | <b>66%</b>           | Na(5), Mg(4), <b>Ca(4)</b>  |
|-------------------------------------------------------------------------------------|-----------|----------------------------|-----------------------------------|----------------------|----------------------|-----------------------------|-----------------------|----------------------|-----------------------------|
| Ca16                                                                                | 1.0       | <b>85.7 (0.0)</b>          |                                   | N/A                  | N/A                  | <b>Free</b>                 | N/A                   | N/A                  | <b>Ca(0)</b> , Na(0), Mg(0) |
| Ca17                                                                                | 1.0       | 85.8 (93.6)                | <b>O<sub>1</sub></b>              | <b>0.17</b>          | <b>1.0</b>           | <b>Poorly Coordinated</b>   | N/A                   | N/A                  | <b>Ca(0)</b> , Na(0), Mg(0) |
| Ca18                                                                                | 1.0       | 101.3 (91.6)               | <b>O<sub>1</sub>N<sub>1</sub></b> | <b>0.16</b>          | <b>0.61</b>          | <b>Tetrahedral</b>          | 3.5°                  | <b>50%</b>           | Na(1), Mg(0), <b>Ca(0)</b>  |
| Ca19                                                                                | 1.0       | 113.2 (107.1)              | <b>O<sub>2</sub></b>              | <b>0.3</b>           | <b>0.8</b>           | <b>Linear</b>               | 12.4°                 | 0                    | Na(1), Mg(1), <b>Ca(1)</b>  |
| Ca20                                                                                | 1.0       | 90.5 (97.7)                | <b>O<sub>2</sub>N<sub>1</sub></b> | <b>0.3</b>           | <b>0.82</b>          | <b>Trigonal Bipyramidal</b> | 11.5°                 | <b>40%</b>           | Na(1), Mg(0), <b>Ca(0)</b>  |
| Ca22                                                                                | 1.0       | 88.4 (78.6)                | <b>O<sub>1</sub></b>              | <b>0.3</b>           | <b>1.0</b>           | <b>Poorly Coordinated</b>   | N/A                   | N/A                  | Na(0), Mg(0), <b>Ca(0)</b>  |
| Ca23                                                                                | 1.0       | 118.1 (109.3)              |                                   | N/A                  | N/A                  | <b>Free</b>                 | N/A                   | N/A                  | <b>Ca(0)</b> , Na(0), Mg(0) |
| Ca24                                                                                | 1.0       | 103.7 (98.1)               | <b>O<sub>1</sub></b>              | <b>0.03</b>          | <b>1.0</b>           | <b>Poorly Coordinated</b>   | N/A                   | N/A                  | <b>Ca(0)</b> , Na(0), Mg(0) |
| Ca25                                                                                | 1.0       | <u>96.3 (82.3)</u>         |                                   | N/A                  | N/A                  | <b>Free</b>                 | N/A                   | N/A                  | <b>Ca(0)</b> , Na(0), Mg(0) |
| Ca26                                                                                | 1.0       | <b>102.2 (0.0)</b>         |                                   | N/A                  | N/A                  | <b>Free</b>                 | N/A                   | N/A                  | <b>Ca(0)</b> , Na(0), Mg(0) |
| Ca27                                                                                | 1.0       | <u>121.3 (85.4)</u>        |                                   | N/A                  | N/A                  | <b>Free</b>                 | N/A                   | N/A                  | <b>Ca(0)</b> , Na(0), Mg(0) |
| Ca28                                                                                | 1.0       | <u>92.2 (67.8)</u>         |                                   | N/A                  | N/A                  | <b>Free</b>                 | N/A                   | N/A                  | <b>Ca(0)</b> , Na(0), Mg(0) |
| <b>Tlm holoE (subclass 1) in 5 mM Ca<sup>2+</sup>; PBD ID: 9OY5; EMD: EMD-70997</b> |           |                            |                                   |                      |                      |                             |                       |                      |                             |
| Metal ID                                                                            | Occupancy | Bfactor(env.) <sup>1</sup> | Atomic contacts                   | Valence <sup>2</sup> | nVECSUM <sup>3</sup> | Geometry <sup>1,4</sup>     | gRMSD(°) <sup>1</sup> | Vacancy <sup>1</sup> | Ranking (Points)            |
| Ca1                                                                                 | 1.0       | <b>63.3 (0.0)</b>          |                                   | N/A                  | N/A                  | <b>Free</b>                 | N/A                   | N/A                  | <b>Ca(0)</b> , Na(0), Mg(0) |
| Ca2                                                                                 | 1.0       | <b>74.5 (0.0)</b>          |                                   | N/A                  | N/A                  | <b>Free</b>                 | N/A                   | N/A                  | <b>Ca(0)</b> , Na(0), Mg(0) |
| Ca3                                                                                 | 1.0       | <b>77.0 (0.0)</b>          |                                   | N/A                  | N/A                  | <b>Free</b>                 | N/A                   | N/A                  | <b>Ca(0)</b> , Na(0), Mg(0) |
| Ca4                                                                                 | 1.0       | <u>89.4 (50.8)</u>         | <b>O<sub>1</sub></b>              | <b>0.05</b>          | <b>1.0</b>           | <b>Poorly Coordinated</b>   | N/A                   | N/A                  | <b>Ca(0)</b> , Na(0), Mg(0) |
| Ca5                                                                                 | 1.0       | 57.4 (58.1)                | <b>O<sub>2</sub></b>              | <b>0.3</b>           | <b>0.96</b>          | Octahedral                  | <u>19.7°</u>          | <b>66%</b>           | Na(3), Mg(3), <b>Ca(3)</b>  |
| Ca6                                                                                 | 1.0       | <u>67.5 (49.8)</u>         | <b>O<sub>1</sub></b>              | <b>0.02</b>          | <b>1.0</b>           | <b>Poorly Coordinated</b>   | N/A                   | N/A                  | <b>Ca(0)</b> , Na(0), Mg(0) |
| Ca7                                                                                 | 1.0       | 79.9 (78.6)                | <b>O<sub>1</sub></b>              | <b>0.04</b>          | <b>1.0</b>           | <b>Poorly Coordinated</b>   | N/A                   | N/A                  | <b>Ca(0)</b> , Na(0), Mg(0) |
| Ca8                                                                                 | 1.0       | <u>79.3 (61.5)</u>         | <b>O<sub>2</sub></b>              | <b>0.4</b>           | <b>0.85</b>          | Octahedral                  | 12.7°                 | <b>66%</b>           | Na(3), Mg(3), <b>Ca(3)</b>  |
| Ca9                                                                                 | 1.0       | 84.1 (75.8)                | <b>O<sub>2</sub></b>              | <b>0.6</b>           | <b>0.72</b>          | Octahedral                  | 1.9°                  | <b>66%</b>           | Na(4), Mg(3), <b>Ca(3)</b>  |
| Ca10                                                                                | 1.0       | <u>46.7 (38.3)</u>         | <b>O<sub>2</sub></b>              | <b>0.5</b>           | <b>0.79</b>          | Octahedral                  | <u>14.4°</u>          | <b>66%</b>           | Na(3), Mg(3), <b>Ca(3)</b>  |
| Ca11                                                                                | 1.0       | 74.8 (68.3)                | <b>O<sub>1</sub></b>              | <b>0.12</b>          | <b>1.0</b>           | <b>Poorly Coordinated</b>   | N/A                   | N/A                  | <b>Ca(0)</b> , Na(0), Mg(0) |
| Ca12                                                                                | 1.0       | <u>25.4 (33.0)</u>         | O <sub>4</sub>                    | <u>1.6</u>           | <b>0.37</b>          | Octahedral                  | 6.0°                  | <b>33%</b>           | Na(6), <b>Ca(5)</b> , Mg(4) |

| Ca13                                                                                 | 1.0       | 99.9 (109.2)               | O <sub>2</sub>  | <b>0.3</b>           | <b>0.93</b>          | Octahedral                | 4.0°                  | <b>66%</b>           | Na(3), Mg(3), Ca(3)  |
|--------------------------------------------------------------------------------------|-----------|----------------------------|-----------------|----------------------|----------------------|---------------------------|-----------------------|----------------------|----------------------|
| Ca14                                                                                 | 1.0       | 46.9 (47.7)                | O <sub>3</sub>  | <b>0.7</b>           | <b>0.58</b>          | Octahedral                | <u>13.7°</u>          | <b>50%</b>           | Na(5), Mg(4), Ca(4)  |
| Ca15                                                                                 | 1.0       | <b>83.6 (39.0)</b>         |                 | N/A                  | N/A                  | <b>Free</b>               | N/A                   | N/A                  | Ca(0), Na(0), Mg(0)  |
| Ca16                                                                                 | 1.0       | 91.4 (98.0)                | O <sub>2</sub>  | <b>0.2</b>           | <b>0.89</b>          | Octahedral                | 7.6°                  | <b>66%</b>           | Na(3), Mg(3), Ca(3)  |
| Ca17                                                                                 | 1.0       | <u>95.3 (80.5)</u>         |                 | N/A                  | N/A                  | <b>Free</b>               | N/A                   | N/A                  | Ca(0), Na(0), Mg(0)  |
| Ca18                                                                                 | 1.0       | <u>79.8 (58.7)</u>         | O <sub>1</sub>  | <b>0.3</b>           | <b>1.0</b>           | <b>Poorly Coordinated</b> | N/A                   | N/A                  | Na(0), Mg(0), Ca(0)  |
| Ca19 (MeA)                                                                           | 1.0       | 48.3 (46.5)                | O <sub>3</sub>  | <b>1.0</b>           | <b>0.6</b>           | Octahedral                | <u>13.7°</u>          | <b>50%</b>           | Na(5), Mg(4), Ca(4)  |
| Ca20                                                                                 | 1.0       | <u>86.9 (66.3)</u>         |                 | N/A                  | N/A                  | <b>Free</b>               | N/A                   | N/A                  | Ca(0), Na(0), Mg(0)  |
| Ca21                                                                                 | 1.0       | <u>132.5 (175.0)</u>       |                 | N/A                  | N/A                  | <b>Free</b>               | N/A                   | N/A                  | Ca(0), Na(0), Mg(0)  |
| Ca22                                                                                 | 1.0       | <u>79.4 (59.8)</u>         | O <sub>1</sub>  | <b>0.09</b>          | <b>1.0</b>           | <b>Poorly Coordinated</b> | N/A                   | N/A                  | Ca(0), Na(0), Mg(0)  |
| Ca23                                                                                 | 1.0       | <u>70.9 (58.6)</u>         | O <sub>1</sub>  | <b>0.02</b>          | <b>1.0</b>           | <b>Poorly Coordinated</b> | N/A                   | N/A                  | Ca(0), Na(0), Mg(0)  |
| Ca24                                                                                 | 1.0       | 77.9 (87.9)                | O <sub>3</sub>  | <b>0.6</b>           | <b>0.58</b>          | Octahedral                | <u>24.2°</u>          | <b>50%</b>           | Na(5), Mg(4), Ca(4)  |
| <b>TLm holoE (subclass 2) in 5 mM Ca<sup>2+</sup>; PBD ID: 9OY6; EMDB: EMD-70998</b> |           |                            |                 |                      |                      |                           |                       |                      |                      |
| Metal ID                                                                             | Occupancy | Bfactor(env.) <sup>1</sup> | Atomic contacts | Valence <sup>2</sup> | nVECSUM <sup>3</sup> | Geometry <sup>1,4</sup>   | gRMSD(°) <sup>1</sup> | Vacancy <sup>1</sup> | Ranking (Points)     |
| Ca1                                                                                  | 1.0       | <b>68.7 (0.0)</b>          |                 | N/A                  | N/A                  | <b>Free</b>               | N/A                   | N/A                  | Ca(0), Na(0), Mg(0)  |
| Ca2                                                                                  | 1.0       | <u>76.5 (59.1)</u>         |                 | N/A                  | N/A                  | <b>Free</b>               | N/A                   | N/A                  | Ca(0), Na(0), Mg(0)  |
| Ca3                                                                                  | 1.0       | <b>74.6 (0.0)</b>          |                 | N/A                  | N/A                  | <b>Free</b>               | N/A                   | N/A                  | Ca(0), Na(0), Mg(0)  |
| Ca4                                                                                  | 1.0       | <u>81.2 (48.8)</u>         | O <sub>1</sub>  | <b>0.06</b>          | <b>1.0</b>           | <b>Poorly Coordinated</b> | N/A                   | N/A                  | Ca(0), Na(0), Mg(0)  |
| Ca5                                                                                  | 1.0       | <u>74.7 (57.0)</u>         | O <sub>2</sub>  | <b>0.3</b>           | <b>0.76</b>          | Octahedral                | 6.8°                  | <b>66%</b>           | Na(3), Mg(3), Ca(3)  |
| Ca6                                                                                  | 1.0       | <u>67.7 (47.6)</u>         |                 | N/A                  | N/A                  | <b>Free</b>               | N/A                   | N/A                  | Ca(0), Na(0), Mg(0)  |
| Ca7                                                                                  | 1.0       | 67.9 (68.8)                | O <sub>1</sub>  | <b>0.06</b>          | <b>1.0</b>           | <b>Poorly Coordinated</b> | N/A                   | N/A                  | Ca(0), Na(0), Mg(0)  |
| Ca8                                                                                  | 1.0       | 104.2 (109.0)              |                 | N/A                  | N/A                  | <b>Free</b>               | N/A                   | N/A                  | Ca(0), Na(0), Mg(0)  |
| Ca9                                                                                  | 1.0       | <u>81.8 (59.4)</u>         | O <sub>2</sub>  | <b>0.4</b>           | <b>0.95</b>          | Octahedral                | <u>20.6°</u>          | <b>66%</b>           | Na(3), Mg(3), Ca(3), |
| Ca10                                                                                 | 1.0       | <u>84.5 (67.9)</u>         | O <sub>2</sub>  | <b>0.5</b>           | <b>0.82</b>          | Octahedral                | <u>13.9°</u>          | <b>66%</b>           | Na(3), Mg(3), Ca(3)  |
| Ca11                                                                                 | 1.0       | <u>39.7 (33.6)</u>         | O <sub>2</sub>  | <b>0.5</b>           | <b>0.8</b>           | Octahedral                | <u>15.9°</u>          | <b>66%</b>           | Na(3), Mg(3), Ca(3)  |
| Ca12                                                                                 | 1.0       | 76.5 (66.7)                | O <sub>1</sub>  | <b>0.3</b>           | <b>1.0</b>           | <b>Poorly Coordinated</b> | N/A                   | N/A                  | Na(0), Mg(0), Ca(0)  |
| Ca13                                                                                 | 1.0       | 28.0 (32.4)                | O <sub>4</sub>  | <u>1.4</u>           | <b>0.4</b>           | Octahedral                | 10.2°                 | <b>33%</b>           | Na(6), Ca(5), Mg(4)  |

| Ca14                                                                                | 1.0       | 95.1 (96.2)                | O <sub>2</sub>  | <b>0.4</b>           | <b>0.76</b>          | Octahedral                | 2.0°                  | <b>66%</b>           | Na(3), Mg(3), Ca(3) |
|-------------------------------------------------------------------------------------|-----------|----------------------------|-----------------|----------------------|----------------------|---------------------------|-----------------------|----------------------|---------------------|
| Ca15                                                                                | 1.0       | 39.9 (41.9)                | O <sub>4</sub>  | <b>0.8</b>           | <b>0.55</b>          | Octahedral                | 13.3°                 | <b>66%</b>           | Na(5), Mg(4), Ca(4) |
| Ca16                                                                                | 1.0       | <u>62.7 (41.5)</u>         |                 | N/A                  | N/A                  | <b>Free</b>               | N/A                   | N/A                  | Ca(0), Na(0), Mg(0) |
| Ca17                                                                                | 1.0       | 104.5 (113.1)              | O <sub>2</sub>  | <b>0.7</b>           | <b>0.67</b>          | Octahedral                | 6.3°                  | <b>66%</b>           | Na(4), Mg(3), Ca(3) |
| Ca18                                                                                | 1.0       | <b>90.0 (0.0)</b>          |                 | N/A                  | N/A                  | <b>Free</b>               | N/A                   | N/A                  | Ca(0), Na(0), Mg(0) |
| Ca19                                                                                | 1.0       | 66.4 (58.4)                | O <sub>1</sub>  | <b>0.3</b>           | <b>1.0</b>           | <b>Poorly Coordinated</b> | N/A                   | N/A                  | Na(0), Mg(0), Ca(0) |
| Ca20 (MeA)                                                                          | 1.0       | <u>45.9 (36.1)</u>         | O <sub>3</sub>  | <b>0.9</b>           | <b>0.65</b>          | Octahedral                | 10.4°                 | <b>50%</b>           | Na(5), Mg(4), Ca(4) |
| Ca21                                                                                | 1.0       | <u>82.5 (46.2)</u>         |                 | N/A                  | N/A                  | <b>Free</b>               | N/A                   | N/A                  | Ca(0), Na(0), Mg(0) |
| Ca22                                                                                | 1.0       | <b>108.3 (0.0)</b>         |                 | N/A                  | N/A                  | <b>Free</b>               | N/A                   | N/A                  | Ca(0), Na(0), Mg(0) |
| Ca23                                                                                | 1.0       | <u>76.8 (54.4)</u>         | O <sub>1</sub>  | <b>0.3</b>           | <b>1.0</b>           | <b>Poorly Coordinated</b> | N/A                   | N/A                  | Na(0), Mg(0), Ca(0) |
| Ca24                                                                                | 1.0       | <u>77.2 (52.1)</u>         | O <sub>1</sub>  | <b>0.04</b>          | <b>1.0</b>           | <b>Poorly Coordinated</b> | N/A                   | N/A                  | Ca(0), Na(0), Mg(0) |
| Ca25                                                                                | 1.0       | 77.4 (81.5)                | O <sub>3</sub>  | <b>0.7</b>           | <b>0.29</b>          | Octahedral                | <u>16.5°</u>          | <b>50%</b>           | Na(5), Mg(4), Ca(4) |
| <b>TLm holoES (pre-tRNA) in 5 mM Ca<sup>2+</sup>; PBD ID: 9OY7; EMDB: EMD-71000</b> |           |                            |                 |                      |                      |                           |                       |                      |                     |
| Metal ID                                                                            | Occupancy | Bfactor(env.) <sup>1</sup> | Atomic contacts | Valence <sup>2</sup> | nVECSUM <sup>3</sup> | Geometry <sup>1,4</sup>   | gRMSD(°) <sup>1</sup> | Vacancy <sup>1</sup> | Ranking (Points)    |
| Ca1                                                                                 | 1.0       | <b>86.2 (0.0)</b>          |                 | N/A                  | N/A                  | <b>Free</b>               | N/A                   | N/A                  | Ca(0), Na(0), Mg(0) |
| Ca2                                                                                 | 1.0       | <b>86.1 (0.0)</b>          |                 | N/A                  | N/A                  | <b>Free</b>               | N/A                   | N/A                  | Ca(0), Na(0), Mg(0) |
| Ca3                                                                                 | 1.0       | <b>86.7 (0.0)</b>          |                 | N/A                  | N/A                  | <b>Free</b>               | N/A                   | N/A                  | Ca(0), Na(0), Mg(0) |
| Ca4                                                                                 | 1.0       | <u>99.3 (78.8)</u>         | O <sub>1</sub>  | <b>0.09</b>          | <b>1.0</b>           | <b>Poorly Coordinated</b> | N/A                   | N/A                  | Ca(0), Na(0), Mg(0) |
| Ca5                                                                                 | 1.0       | 70.9 (70.9)                | O <sub>3</sub>  | <b>0.9</b>           | <b>0.67</b>          | Octahedral                | 12.9°                 | <b>50%</b>           | Na(5), Mg(4), Ca(4) |
| Ca6                                                                                 | 1.0       | <u>100.1 (82.8)</u>        | O <sub>1</sub>  | <b>0.3</b>           | <b>1.0</b>           | <b>Poorly Coordinated</b> | N/A                   | N/A                  | Na(0), Mg(0), Ca(0) |
| Ca7                                                                                 | 1.0       | <u>81.6 (66.4)</u>         |                 | N/A                  | N/A                  | <b>Free</b>               | N/A                   | N/A                  | Ca(0), Na(0), Mg(0) |
| Ca8                                                                                 | 1.0       | 94.6 (95.1)                |                 | N/A                  | N/A                  | <b>Free</b>               | N/A                   | N/A                  | Ca(0), Na(0), Mg(0) |
| Ca9                                                                                 | 1.0       | <u>98.3 (79.0)</u>         |                 | N/A                  | N/A                  | <b>Free</b>               | N/A                   | N/A                  | Ca(0), Na(0), Mg(0) |
| Ca10                                                                                | 1.0       | 84.1 (74.2)                | O <sub>4</sub>  | <b>1.2</b>           | <b>0.25</b>          | <b>Linear</b>             | 12.9°                 | 0                    | Na(4), Mg(2), Ca(2) |
| Ca11                                                                                | 1.0       | 99.3 (90.9)                | O <sub>2</sub>  | <b>0.5</b>           | <b>0.81</b>          | Octahedral                | <u>17.3°</u>          | <b>66%</b>           | Na(4), Mg(3), Ca(3) |
| Ca12                                                                                | 1.0       | 70.6 (63.2)                | O <sub>3</sub>  | <b>0.3</b>           | <b>0.7</b>           | Octahedral                | <u>20.5°</u>          | <b>50%</b>           | Na(4), Mg(4), Ca(4) |
| Ca13                                                                                | 1.0       | <u>107.5 (85.9)</u>        | O <sub>1</sub>  | <b>0.3</b>           | <b>1.0</b>           | <b>Poorly Coordinated</b> | N/A                   | N/A                  | Na(0), Mg(0), Ca(0) |

|      |     |                     |                                   |            |             |                             |              |            |                             |
|------|-----|---------------------|-----------------------------------|------------|-------------|-----------------------------|--------------|------------|-----------------------------|
| Ca14 | 1.0 | <u>52.1</u> (61.0)  | O <sub>4</sub>                    | <u>1.2</u> | <u>0.37</u> | Octahedral                  | <u>13.9°</u> | <u>33%</u> | Na(6), Mg(4), <b>Ca(4)</b>  |
| Ca15 | 1.0 | 90.4 (87.5)         | <u>O<sub>2</sub></u>              | <u>0.6</u> | <u>0.76</u> | Octahedral                  | 8.0°         | <u>66%</u> | Na(4), Mg(3), <b>Ca(3)</b>  |
| Ca16 | 1.0 | 78.6 (75.3)         | O <sub>4</sub>                    | <u>0.8</u> | <u>0.45</u> | Octahedral                  | 12.7°        | <u>66%</u> | Na(5), Mg(4), <b>Ca(4)</b>  |
| Ca17 | 1.0 | <u>102.0</u> (0.0)  |                                   | N/A        | N/A         | <u>Free</u>                 | N/A          | N/A        | <b>Ca(0)</b> , Na(0), Mg(0) |
| Ca18 | 1.0 | 101.8 (103.7)       | <u>O<sub>2</sub></u>              | <u>0.5</u> | <u>0.59</u> | <u>Tetrahedral</u>          | 2.3°         | <u>50%</u> | Na(2), Mg(1), <b>Ca(1)</b>  |
| Ca19 | 1.0 | <u>97.1</u> (119.2) | <u>O<sub>2</sub>N<sub>1</sub></u> | <u>0.3</u> | <u>0.68</u> | <u>Trigonal Bipyramidal</u> | <u>13.7°</u> | <u>40%</u> | Na(1), Mg(0), <b>Ca(0)</b>  |
| Ca20 | 1.0 | 90.7 (81.7)         | <u>O<sub>1</sub></u>              | <u>0.3</u> | <u>1.0</u>  | <u>Poorly Coordinated</u>   | N/A          | N/A        | Na(0), Mg(0), <b>Ca(0)</b>  |
| Ca21 | 1.0 | <u>105.6</u> (0.0)  |                                   | N/A        | N/A         | <u>Free</u>                 | N/A          | N/A        | <b>Ca(0)</b> , Na(0), Mg(0) |
| Ca22 | 1.0 | <u>92.8</u> (76.9)  | <u>O<sub>2</sub></u>              | <u>0.4</u> | <u>0.83</u> | Octahedral                  | 2.9°         | <u>66%</u> | Na(3), Mg(3), <b>Ca(3)</b>  |
| Ca23 | 1.0 | <u>83.8</u> (62.8)  |                                   | N/A        | N/A         | <u>Free</u>                 | N/A          | N/A        | <b>Ca(0)</b> , Na(0), Mg(0) |
| Ca24 | 1.0 | 85.4 (95.2)         | O <sub>3</sub>                    | <u>0.8</u> | <u>0.56</u> | Octahedral                  | <u>21.6°</u> | <u>50%</u> | Na(5), Mg(4), <b>Ca(4)</b>  |
| Ca25 | 1.0 | <u>90.0</u> (67.6)  | O <sub>5</sub>                    | <u>1.5</u> | <u>0.24</u> | <u>Trigonal Bipyramidal</u> | <u>17.5°</u> | 0          | Na(5), <b>Ca(3)</b> , Mg(2) |

**Supplementary Table 4. Kinetic rate constants of pre-tRNA hydrolysis by RNase P holoenzyme derived from quantitative mass analysis.**

|                | $k_{on}$ ( $\mu\text{M}^{-1} \text{min}^{-1}$ ) | $k_{cat}$ ( $\text{min}^{-1}$ ) | [holoE] ( $\mu\text{M}$ ) | [pre-tRNA] ( $\mu\text{M}$ ) | Percentage of singular value |
|----------------|-------------------------------------------------|---------------------------------|---------------------------|------------------------------|------------------------------|
| Experimental 1 | $3.55 \pm 0.20$                                 | $1.05 \pm 0.059$                | 0.2*                      | 2*                           | 87 %                         |
| Experimental 2 | $2.17 \pm 0.26$                                 | $0.95 \pm 0.11$                 | 0.2*                      | 2*                           | 92 %                         |

Footnote: \*fixed constant during the nonlinear regression fit.
